# Supplementary material
Source: MDPI journal article supplement (https://www.mdpi.com/2073-4344/12/12/1516)

## Supplementary Materials

### Synthesis of Polysubstituted 1,2-dihydro-3*H*-pyrrolo[1,2-*a*]indol-3-ones through Domino Palladium-Catalyzed Reactions of Indol-2-ylmethyl acetates with 1,3- Dicarboxyl Derivatives

Antonia Iazzetti,<sup>1</sup> Antonio Arcadi,<sup>1</sup> Stefano Dessalvi,<sup>3</sup> Giancarlo Fabrizi,<sup>3</sup> Antonella Goggiamani,<sup>3,\*</sup> Federico Marrone,<sup>3</sup> Andrea Serraiocco,<sup>3</sup> Alessio Sferrazza,<sup>3,\*</sup> Karim Ullah<sup>3</sup>

<sup>1</sup> Dipartimento di Scienze Biotechnologiche di base, Cliniche Intensivologiche e Perioperatorie, Università Cattolica del Sacro Cuore, L.go Francesco Vito 1, 00168 Rome, Italy. A.I: antonia.iazzetti@unicatt.it

<sup>2</sup> Dipartimento di Ingegneria e Scienze dell'Informazione e Matematica, Università degli Studi di L'Aquila; Via Vetoio, 67100 Coppito (AQ), Italy. A. A antonio.arcadi@univaq.it

<sup>3</sup> Dipartimento di Chimica e Tecnologie del Farmaco, Sapienza, Università di Roma, P.le A. Moro 5, 00185 Rome, Italy. E-mail: S. D. stefano.dessalvi@uniroma1.it; G. F.

Giancarlo.fabrizi@uniroma1.it; A. G. antonella.goggiamani@uniroma1.it; F. M.

Federico.mrrone@uniroma1.it; A. S. andrea.serraiocco@uniroma1.it; A. S.

a.sferrazza@irbm.com. Alessio Sferrazza is currently a research scientist in IRBM S.p.A.,

Medicinal Chemistry Department, Pomezia, Roma, Italy; K. U. karim.ullah@uniroma1.it

\* Correspondence: A.G. antonella.goggiamani@uniroma1.it; A.S. a.sferrazza@irbm.com

#### Contents

|                                                                                                                                   |     |
|-----------------------------------------------------------------------------------------------------------------------------------|-----|
| 1. SYNTHETIC PROCEDURES .....                                                                                                     | 2   |
| 1.1. General procedure for the preparation of (1 <i>H</i> -indol-2-yl)methyl acetates ( <b>1a</b> , <b>1c</b> , <b>1d</b> ) ..... | 2   |
| 1.1.a Typical procedure for the preparation of (1 <i>H</i> -indol-2-yl)methyl acetate ( <b>1a</b> ) .....                         | 2   |
| 1.2. General procedure for the preparation of (3-aryl-1 <i>H</i> -indol-2-yl)methyl acetate <b>1g</b> , <b>1h</b> .....           | 3   |
| 1.2.a Typical procedure for the preparation of (3-phenyl-1 <i>H</i> -phenyl-2-yl)methyl acetate ( <b>1g</b> ) .....               | 3   |
| 1.3 General procedure for the synthesis of 5-aryl-1 <i>H</i> -indol-2-yl)methyl acetate ( <b>1e</b> , <b>1f</b> ) .....           | 4   |
| 1.3.a Typical procedure for the preparation of (5-( <i>p</i> -tolyl)-1 <i>H</i> -indol-2-yl)methyl acetate ( <b>1e</b> ) .....    | 5   |
| 1.4. General procedure for the preparation of (1 <i>H</i> -indol-2-yl)methyl acetates ( <b>4a</b> , <b>4b</b> ) .....             | 6   |
| 1.4.a Typical procedure for the preparation of 1-(1 <i>H</i> -indol-2-yl)methyl acetate ( <b>4b</b> ) .....                       | 6   |
| 1.5. General procedure for the preparation of (1 <i>H</i> -indol-2-yl)methyl ethyl carbonate ( <b>1b</b> ) .....                  | 7   |
| 1.5.a Typical procedure for the preparation of (1 <i>H</i> -indol-2-yl)methyl ethyl carbonate ( <b>1b</b> ) .....                 | 7   |
| 2. CHARACTERIZATION DATA OF STARTING MATERIALS .....                                                                              | 8   |
| 2.1. Characterization data of ethyl 3 and 5 aryl 1 <i>H</i> -indole-2-carboxylate .....                                           | 8   |
| 2.2. Characterization data of (1 <i>H</i> -indol-2-yl)methanols .....                                                             | 9   |
| 3. HF CALCULATION ON DIASTEREOMERS <b>5a</b> and <b>5'a</b> .....                                                                 | 12  |
| 4. REFERENCES .....                                                                                                               | 253 |
| 5. COPIES OF NMR SPECTRA .....                                                                                                    | 254 |

## 1. SYNTHETIC PROCEDURES

### 1.1. General procedure for the preparation of (1*H*-indol-2-yl)methyl acetates (1a, 1c, 1d)

(1*H*-indol-2-yl)methyl acetates (**1a**, **1c**, **1d**) were prepared according to the two-step sequence outlined in Scheme 1 and previously optimized in our laboratory.

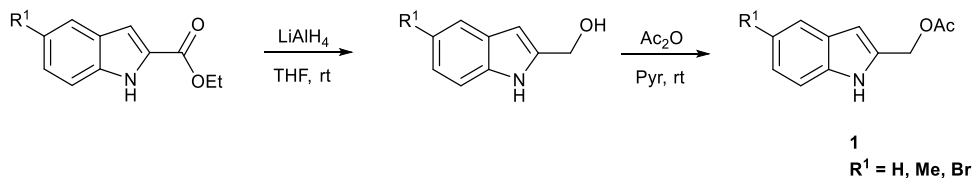

**Scheme 1**

#### 1.1.a Typical procedure for the preparation of (1*H*-indol-2-yl)methyl acetate (**1a**)

##### **STEP 1: synthesis of (1*H*-indol-2-yl)methanol**

A flame dried three-necked round bottom flask, equipped with a magnetic stirring bar, was charged with ethyl 1*H*-indole-2-carboxylate (1.50 g, 7.93 mmol, 1.0 equiv) dissolved in anhydrous THF (20 mL) under argon. Then, a solution of LiAlH<sub>4</sub> in THF (2 M, 4.4 mL, 8.72 mmol, 1.1 equiv) was added dropwise at 0°C and the mixture was stirred for 1 hour. After this time, the mixture was allowed to warm to room temperature and stirred until the disappearance of the starting material, monitoring by TLC (*n*-hexane-EtOAc, 80:20). The reaction was cooled down to 0°C and quenched with an 80 percent aqueous MeOH solution. The mixture was extracted with CH<sub>2</sub>Cl<sub>2</sub>, washed with a solution of KHSO<sub>4</sub> (10% w/w) and with brine. The organic layer was dried over Na<sub>2</sub>SO<sub>4</sub>, filtered, and concentrated under reduced pressure. The resulting crude product (1*H*-indol-2-yl)methanol) was used in the next step without further purification (1.11 g, 95% yield).

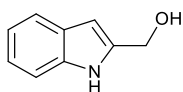

**(1*H*-indol-2-yl)methanol**: known compound; 95% yield (7.93 mmol scale, 1.11 g); yellow solid; mp: 72-74 °C; lit.<sup>1</sup> mp: 72-73 °C;  $R_f = 0.23$  (*n*-hexane-EtOAc, 80:20); IR (neat): 3373, 2856, 1617, 1453, 1289, 1004 cm<sup>-1</sup>; <sup>1</sup>H NMR: (400.13 MHz) (DMSO-*d*<sub>6</sub>): δ 11.0 (s, 1 H), 7.46 (d,  $J = 7.8$  Hz, 1 H), 7.33 (dd,  $J_1 = 7.8$  Hz,  $J_2 = 0.7$  Hz, 1 H), 7.03 (td,  $J_1 = 8.0$  Hz,  $J_2 = 1.2$  Hz, 1 H), 6.94 (td,  $J_1 = 8.0$  Hz,  $J_2 = 1.2$  Hz, 1 H), 6.27 (d,  $J = 1.2$  Hz, 1 H), 5.22 (t,  $J = 5.6$  Hz, 1 H), 4.61 (d,  $J = 5.6$  Hz, 2 H); <sup>13</sup>C NMR (100.6 MHz) (DMSO-*d*<sub>6</sub>): δ 140.6 (C), 136.7 (C), 128.3 (C), 121.0 (CH), 120.1 (CH), 119.1 (CH), 111.5 (CH), 98.9 (CH), 57.4 (CH<sub>2</sub>); HRMS:  $m/z$  [M + H]<sup>+</sup> calcd for C<sub>9</sub>H<sub>10</sub>NO: 146.0611; found: 146.0599.

##### **STEP 2: synthesis of (1*H*-indol-2-yl)methyl acetate (**1a**)**

To a stirred solution of (1*H*-indol-2-yl)methanol (1.10 g, 7.47 mmol, 1.0 equiv.) in pyridine (3.0 mL) acetic anhydride (918 μL, 9.72 mmol, 1.3 equiv.) was added at 0°C and the reaction mixture was stirred for 1.5 hours. Then, the reaction was diluted with CH<sub>2</sub>Cl<sub>2</sub>, washed with a solution of KHSO<sub>4</sub> (10% w/w), saturated solution of NaHCO<sub>3</sub>, and with brine. The organic layer was dried over Na<sub>2</sub>SO<sub>4</sub>, filtered, and concentrated under reduced pressure. The resulting crude product **1a** was used in the next step without further purification (1.34 g, 95% yield).

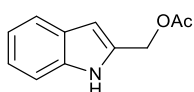

**(1*H*-indol-2-yl)methyl acetate (**1a**)**: known compound; 95% yield (7.47 mmol scale, 1.34 g); yellow solid; mp: 104-106 °C; lit.<sup>1</sup> mp: 112 °C;  $R_f = 0.27$  (*n*-hexane-EtOAc, 80:20); IR (neat): 3303, 1726, 1454, 1274, 1045, 805

cm<sup>-1</sup>; <sup>1</sup>H (400.13 MHz) (CDCl<sub>3</sub>): δ = 8.51 (br s, 1 H), 7.52 (d, *J* = 8.0 Hz, 1 H), 7.27 (d, *J* = 8.0 Hz, 1 H), 7.13 (t, *J* = 7.6 Hz, 1 H), 7.00 (t, *J*<sub>1</sub> = 7.6 Hz, 1 H), 6.46 (s, 1 H), 5.15 (s, 2 H), 2.03 (s, 3 H); <sup>13</sup>C NMR (100.6 MHz) (CDCl<sub>3</sub>): δ = 172.3 (C), 136.6 (C), 133.0 (C), 127.5 (C), 122.8 (CH), 120.9 (CH), 120.1 (CH), 111.1 (CH), 103.9 (CH), 59.8 (CH<sub>2</sub>), 21.0 (CH<sub>3</sub>); HRMS: *m/z* [M + H]<sup>+</sup> calcd for C<sub>11</sub>H<sub>10</sub>NO<sub>2</sub>: 188.0717; found: 188.0705.

**1.2. General procedure for the preparation of (3-aryl-1*H*-indol-2-yl)methyl acetate **1g**, **1h****  
 (3-aryl-1*H*-indol-2-yl)methyl acetate **1g**, **1h** were prepared according to the four-steps sequence outlined in Scheme 2.

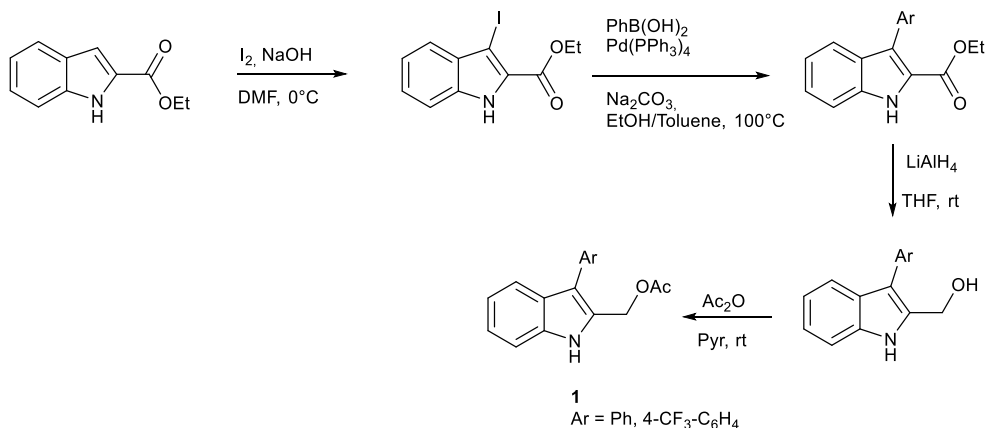

**Scheme 2**

**1.2.a Typical procedure for the preparation of (3-phenyl-1*H*-phenyl-2-yl)methyl acetate (**1g**)**

**STEP 1: synthesis of ethyl 3-iodo-1*H*-indole-2-carboxylate**

To a solution of ethyl 1*H*-indole-2-carboxylate (1.50 g, 7.92 mmol, 1.0 equiv.) in DMF (9.0 mL) KOH (2.22 g, 39.6 mmol, 5.0 equiv.) was added at 0°C and the resulting mixture was stirred for 10 minutes before a solution of iodine (1.02g, 8.03 mmol, 1.05 equiv.) in DMF (10.0 mL) was added dropwise over 5 minutes. After 3h, the mixture was poured into a saturated solution of NH<sub>4</sub>Cl and Na<sub>2</sub>S<sub>2</sub>O<sub>3</sub> to precipitate the product. The solid material was filtered off, solubilized in Et<sub>2</sub>O, washed with water and dried over Na<sub>2</sub>SO<sub>4</sub>. After filtration, the mixture was concentrated under reduced pressure to give ethyl 3-iodo-1*H*-indole-2-carboxylate as an off-white powder (2.37 g, 95% yield).

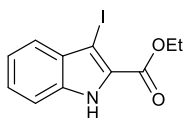

**ethyl 3-iodo-1*H*-indole-2-carboxylate**: known compound; 85% yield (7.92 mmol scale, 2.37 g); white solid; mp: 133-135 °C; lit.<sup>2</sup> mp: 137-139 °C; *R*<sub>f</sub> = 0.23 (*n*-hexane-EtOAc, 80:20); IR (neat): 3289, 2896, 1686, 1505, 1255, 859 cm<sup>-1</sup>; <sup>1</sup>H NMR: (400.13 MHz) (CDCl<sub>3</sub>): δ 9.42 (br s, 1 H), 7.60 (d, *J* = 8.4 Hz, 1 H), 7.43-7.38 (m, 2 H), 7.28-7.24 (m, 1 H), 4.50 (q, *J* = 6.9 Hz, 2 H), 1.50 (t, *J* = 6.9 Hz, 3 H); <sup>13</sup>C NMR (100.6 MHz) (CDCl<sub>3</sub>): δ 161.1 (C), 136.3 (C), 131.6 (C), 127.3 (C), 126.7 (CH), 123.6 (CH), 121.8 (CH), 112.2 (CH), 66.2 (C), 61.7 (CH<sub>2</sub>), 14.5 (CH<sub>3</sub>); HRMS: *m/z* [M + H]<sup>+</sup> calcd for C<sub>11</sub>H<sub>10</sub>INO<sub>2</sub>Na: 337.9648; found: 337.9644.

**STEP 2: synthesis of ethyl 3-phenyl-1*H*-indole-2-carboxylate**

In a three-necked round bottom flask, equipped with a condenser and magnetic stirring bar, [Pd(PPh<sub>3</sub>)<sub>4</sub>] (439.2 mg, 0.38 mmol, 0.05 equiv) was dissolved at room temperature in 25,0 mL of EtOH/Toluene (2:1) under argon; then, ethyl 3-iodo-1*H*-indole-2-carboxylate (2.37 g, 7.52 mmol, 1.0 equiv), phenylboronic acid (2.76 g, 22.6 mmol, 3.0 equiv), and Na<sub>2</sub>CO<sub>3</sub> (2.39 g, 22.6 mmol, 3.0 equiv) were added and the mixture was refluxed for 16 hours. After this time, the mixture was cooled to room temperature, diluted with CH<sub>2</sub>Cl<sub>2</sub> and washed with brine. The organic layer was dried over Na<sub>2</sub>SO<sub>4</sub>, filtered, and concentrated under reduced

pressure. The residue was purified by chromatography on SiO<sub>2</sub> (25-40  $\mu$ m), eluting with an 80/20 (v/v) *n*-hexane-AcOEt mixture (*R<sub>f</sub>* = 0.22) to obtain the ethyl 3-phenyl-1*H*-indole-2-carboxylate (1.69 g, 85% yield).

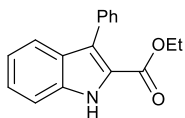

**ethyl 3-phenyl-1*H*-indole-2-carboxylate:** known compound; 85% yield (7.52 mmol scale, 1.69 g); yellow solid; mp: 133-135 °C; lit.<sup>3</sup> mp: 133-135 °C; *R<sub>f</sub>* = 0.23 (*n*-hexane-EtOAc, 80:20); IR (neat): 3331, 2916, 1675, 1383, 1254 cm<sup>-1</sup>; <sup>1</sup>H NMR (400.13 MHz) (CDCl<sub>3</sub>):  $\delta$  9.04 (br s, 1 H), 7.65 (d, *J* = 8.4 Hz, 1 H), 7.58-7.55 (m, 2 H), 7.48-7.44 (m, 3 H), 7.41-7.35 (m, 2 H), 7.18-7.14 (m, 1 H), 4.30 (q, *J* = 7.2 Hz, 2 H), 1.24 (t, *J* = 7.2 Hz, 3 H); <sup>13</sup>C NMR (100.6 MHz) (CDCl<sub>3</sub>):  $\delta$  162.1 (C), 135.8 (C), 130.8 (C), 128.1 (CH), 127.9 (CH), 127.3 (CH), 125.9, 124.4, 122.9, 121.9, 121.0, 111.8 (CH), 61.0 (CH), 14.2 (CH<sub>2</sub>); HRMS: *m/z* [M + Na]<sup>+</sup> calcd for C<sub>17</sub>H<sub>15</sub>NO<sub>2</sub>Na: 288.0995; found: 288.0991.

### STEP 3: synthesis of (3-phenyl-1*H*-indol-2-yl)methanol

(3-phenyl-1*H*-indol-2-yl)methanol was synthesized according to the typical procedures outlined for (1*H*-indol-2-yl)methanol.

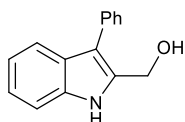

**(3-phenyl-1*H*-indol-2-yl)methanol:** known compound; 81% yield (6.37 mmol scale, 1.15 g); brown solid; mp: 88-90 °C; lit.<sup>4</sup> mp: *R<sub>f</sub>* = 0.25 (*n*-hexane-EtOAc, 70:30); IR (neat): 3391, 2917, 1730, 1456, 1384, 1231 cm<sup>-1</sup>; <sup>1</sup>H NMR (400.13 MHz) (CDCl<sub>3</sub>):  $\delta$  8.56 (br s, 1 H), 7.73 (d, *J* = 8.4 Hz, 1 H), 7.48-7.46 (m, 4 H), 7.37-7.33 (m, 2 H), 7.24 (dt, *J*<sub>1</sub> = 8.0 Hz, *J*<sub>2</sub> = 1.1 Hz, 1 H), 7.16 (dt, *J*<sub>1</sub> = 8.0 Hz, *J*<sub>2</sub> = 1.1 Hz, 1 H), 4.89 (s, 2 H); <sup>13</sup>C NMR (100.6 MHz) (CDCl<sub>3</sub>):  $\delta$  135.7 (C), 134.6 (C), 133.7 (C), 129.5 (CH), 128.8 (CH), 127.4 (C), 126.5 (CH), 122.7 (CH), 120.4 (CH), 119.7 (CH), 115.4 (C), 111.2 (CH), 57.2 (CH<sub>2</sub>); HRMS: *m/z* [M + H]<sup>+</sup> calcd for C<sub>15</sub>H<sub>12</sub>NO: 222.0924; found: 222.0917.

### STEP 4: synthesis of (3-phenyl-1*H*-indol-2-yl)methyl acetate (**1g**)

3-phenyl-1*H*-indol-2-yl)methyl acetate **1g** was synthesized according to the typical procedures outlined for **1a**, step 3.

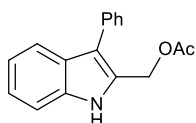

**(3-phenyl-1*H*-indol-2-yl)methyl acetate (**1g**):** quantitative yield (5.15 mmol scale, 1.37 g); yellow solid; mp: 133-135 °C; *R<sub>f</sub>* = 0.25 (*n*-hexane-EtOAc, 80:20); IR (neat): 3391, 2917, 1730, 1456, 1384, 1231 cm<sup>-1</sup>; <sup>1</sup>H NMR (400.13 MHz) (CDCl<sub>3</sub>):  $\delta$  8.71 (br s, 1 H), 7.65 (d, *J* = 8.0 Hz, 1 H), 7.47 (d, *J* = 7.5 Hz, 2 H), 7.41 (t, *J* = 7.5 Hz, 2 H), 7.30 (t, *J* = 8.3 Hz, 2 H), 7.17 (d, *J* = 7.0 Hz, 1 H), 7.06 (t, *J* = 7.5 Hz, 1 H), 5.19 (s, 2 H), 2.06 (s, 3 H); <sup>13</sup>C NMR (100.6 MHz) (CDCl<sub>3</sub>):  $\delta$  172.8 (C), 135.8 (C), 134.2 (C), 129.8 (CH), 129.4 (C), 128.8 (CH), 126.8 (CH), 126.7 (C), 123.5 (CH), 120.4 (CH), 120.2 (CH), 118.8 (C), 111.4 (CH), 58.5 (CH<sub>2</sub>), 21.2 (CH<sub>3</sub>); HRMS: *m/z* [M + H]<sup>+</sup> calcd for C<sub>17</sub>H<sub>14</sub>NO<sub>2</sub>: 288.0995; found: 288.0997.

## 1.3 General procedure for the synthesis of 5-aryl-1*H*-indol-2-yl)methyl acetate (**1e**, **1f**)

The (5-aryl-1*H*-indol-2-yl)methyl acetate (**1e**, **1f**) were synthesized according to the following scheme 3.



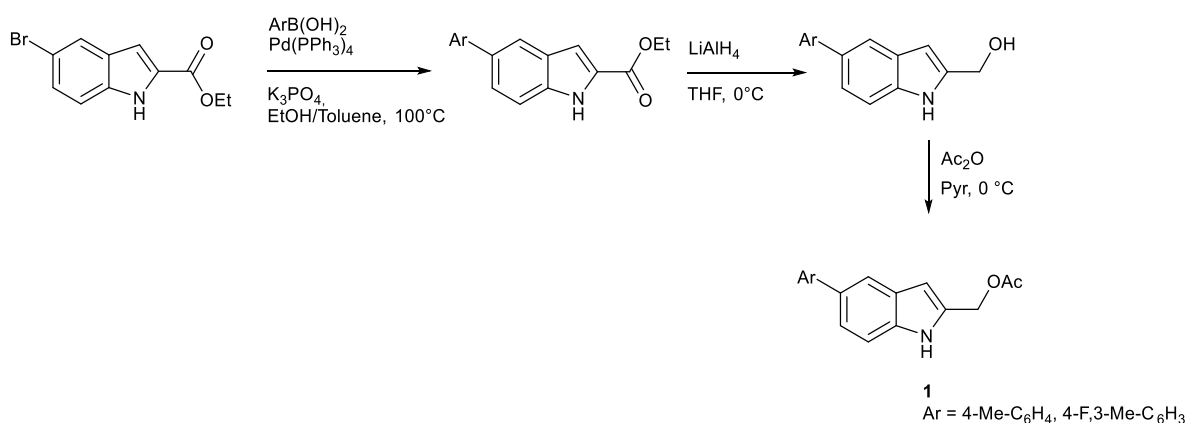

### Scheme 3

#### 1.3.a Typical procedure for the preparation of (5-(*p*-tolyl)-1*H*-indol-2-yl)methyl acetate (1e)

##### STEP 1: synthesis of ethyl 5-(*p*-tolyl)-1*H*-indole-2-carboxylate

In a three-necked round bottom flask, equipped with a condenser and magnetic stirring bar, [Pd(PPh<sub>3</sub>)<sub>4</sub>] (288.75 mg, 0.25 mmol, 0.05 equiv) was dissolved at room temperature in 15,0 mL of EtOH/Toluene (2:1) under argon; then, ethyl 5-bromo-1*H*-indole-2-carboxylate (1.34 g, 5.0 mmol, 1.0 equiv), phenylboronic acid (1.83 g, 15.0 mmol, 3.0 equiv), and K<sub>3</sub>PO<sub>4</sub> (3.18 g, 15.0 mmol, 3.0 equiv) were added and the mixture was refluxed for 16 hours. After this time, the mixture was cooled to room temperature, diluted with CH<sub>2</sub>Cl<sub>2</sub> and washed with brine. The organic layer was dried over Na<sub>2</sub>SO<sub>4</sub>, filtered, and concentrated under reduced pressure. The residue was purified by chromatography on SiO<sub>2</sub> (25-40 μm), eluting with an 80/20 (v/v) *n*-hexane-AcOEt mixture (*R*<sub>f</sub> = 0.23) to obtain the ethyl 3-phenyl-1*H*-indole-2-carboxylate (1.12 g, 80% yield).

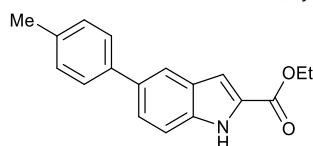

**ethyl 5-(*p*-tolyl)-1*H*-indole-2-carboxylate:** 80% yield (5.0 mmol scale, 1.12 g), yellow solid; mp: 178-180 °C; *R*<sub>f</sub> = 0.23 (*n*-hexane-EtOAc, 80:20); IR (KBr): 3321.8, 2903.5, 1692.2, 1383.7, 1186.1; <sup>1</sup>H NMR (400.13 MHz) (CDCl<sub>3</sub>): δ = 9.32 (bs, 1 H), 7.90 (s, 1 H), 7.63-7.58 (m, 3 H), 7.52 (d, *J* = 8.8 Hz, 1 H), 7.31-7.29 (m, 3 H), 4.50 (q, *J* = 6.8 Hz, 2 H), 2.45 (s, 3 H), 1.49 (d, *J* = 7.2 Hz, 3 H); <sup>13</sup>C NMR (100.6 MHz) (CDCl<sub>3</sub>): δ = 162.3 (C), 139.1 (C), 136.4 (C), 134.3 (C), 129.5 (CH), 128.1 (C), 127.2 (CH), 125.4 (CH), 120.5 (CH), 112.1 (CH), 108.9 (CH), 61.1 (CH<sub>2</sub>), 21.1 (CH<sub>3</sub>), 14.4 (CH<sub>3</sub>). HRMS: *m/z* [M + H]<sup>+</sup> calcd for C<sub>18</sub>H<sub>18</sub>NO<sub>2</sub>: 280.1332; found: 280.1317.

##### STEP 2: (5-(*p*-tolyl)-1*H*-indol-2-yl)methanol

(5-(*p*-tolyl)-1*H*-indol-2-yl)methanol was synthesized according to the typical procedures outlined for (1*H*-indol-2-yl)methanol, *step 1*.

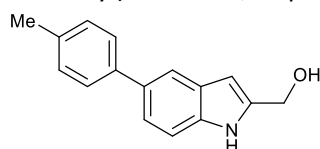

**(5-(*p*-tolyl)-1*H*-indol-2-yl)methanol:** 75% yield (4.0 mmol scale, 713.0 mg); brown solid; mp: 126-128 °C; *R*<sub>f</sub> = 0.25 (*n*-hexane-EtOAc, 75:25); IR (KBr): 3258.1, 2917.8, 1580.4, 1384.6, 1088.6; <sup>1</sup>H NMR (400.13 MHz) (DMSO-*d*<sub>6</sub>): δ = 11.04 (s, 1 H), 7.71 (t, *J* = 0.6 Hz, 1 H), 7.54 (d, *J* = 8.1 Hz, 2 H), 7.41-7.37 (m, 1 H), 7.34-7.30 (m, 1 H), 7.23 (d, *J* = 8.0 Hz, 2 H), 6.32 (d, *J* = 1.1 Hz, 1 H), 5.26 (t, *J* = 5.5 Hz, 1 H), 4.62 (d, *J* = 5.6 Hz, 2 H), 2.34 (s, 3 H); <sup>13</sup>C NMR (100.6 MHz) (DMSO-*d*<sub>6</sub>): δ = 141.4, 139.6, 136.2, 135.6 (CH), 131.6, 129.8 (CH), 128.5 (CH),

126.9 (CH), 120.3 (CH), 117.9 (CH), 111.9 (CH), 99.4 (CH), 57.4 (CH<sub>2</sub>), 21.1 (CH<sub>3</sub>). HRMS:  $m/z$  [M + Na]<sup>+</sup> calcd for C<sub>16</sub>H<sub>15</sub>NONa: 260.1046; found: 260.1050.

### STEP 3: synthesis of (5-(*p*-tolyl)-1*H*-indol-2-yl)methyl acetate (**1e**)

(5-(*p*-tolyl)-1*H*-indol-2-yl)methyl acetate (**1e**) was synthesized according to the typical procedures outlined for **1a**, step 3.

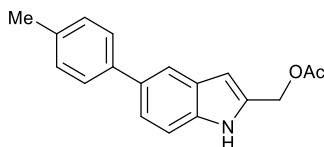

**(5-(*p*-tolyl)-1*H*-indol-2-yl)methyl acetate (**1e**):** 98% yield (3.92 mmol scale, 1.10 g); yellow solid; mp: 178-180 °C; IR (KBr): 3398.9, 2918.7, 1727.9, 1384.6, 1235.2; <sup>1</sup>H NMR (400.13 MHz) (CDCl<sub>3</sub>): δ = 8.62 (bs, 1 H), 7.79 (s, 1 H), 7.55-7.53 (m, 2 H), 7.45 (dd,  $J_1$  = 8.50 Hz,  $J_2$  = 1.62, 1 H), 7.39 (d,  $J$  = 8.50 Hz, 1 H), 7.25 (m, 2 H), 6.58 (d,  $J$  = 1.17 Hz, 1 H), 5.24 (s, 2 H), 2.40 (s, 3 H), 2.11 (s, 3 H); <sup>13</sup>C NMR (100.6 MHz) (CDCl<sub>3</sub>): δ = 172.5 (C), 139.6 (C), 136.1 (C), 136.0 (C), 133.8 (C), 133.7 (C), 129.5 (CH), 128.2 (C), 127.3 (CH), 122.8 (CH), 119.2 (CH), 111.4 (CH), 104.3 (CH), 59.9 (CH<sub>2</sub>), 21.2 (CH<sub>3</sub>), 21.1 (CH<sub>3</sub>); HRMS:  $m/z$  [M + Na]<sup>+</sup> calcd for C<sub>18</sub>H<sub>17</sub>NO<sub>2</sub>Na: 302.1152; found: 302.1153.

## 1.4. General procedure for the preparation of (1*H*-indol-2-yl)methyl acetates (**4a**, **4b**)

Compounds **4a** and **4b** were prepared according to the two-steps sequence outlined in Scheme 4.

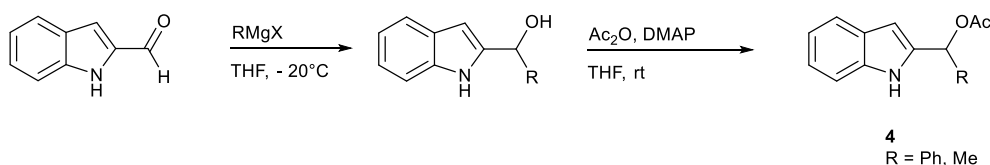

**Scheme 4**

### 1.4.a Typical procedure for the preparation of 1-(1*H*-indol-2-yl)ethan-1-ol (**4b**)

#### STEP 1: synthesis of 1-(1*H*-indol-2-yl)ethan-1-ol

A flame dried three-necked round bottom flask, equipped with a magnetic stirring bar, was charged with 1*H*-indole-2-carbaldehyde (1.00 g, 6.89 mmol, 1.0 equiv) dissolved in anhydrous THF (20 mL) under argon. Then, a solution of MeMgBr in THF (3 M, 9.2 mL, 27.56 mmol, 4.0 equiv) was added dropwise at -78 °C and the mixture was stirred for 1 hour at -20 °C until the disappearance of the starting material, monitoring by TLC (*n*-hexane-EtOAc, 85:15). After this time, the mixture was allowed to warm to room temperature and quenched with a solution of NH<sub>4</sub>Cl. Then, the mixture was extracted with CH<sub>2</sub>Cl<sub>2</sub>, washed with a solution of KHSO<sub>4</sub> (10 % w/w), and with brine. The organic layer was dried over Na<sub>2</sub>SO<sub>4</sub>, filtered, and concentrated under reduced pressure. The resulting crude product 1-(1*H*-indol-2-yl)ethan-1-ol was used in the next step without further purification (1.00 g, 90% yield).

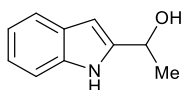

**1-(1*H*-indol-2-yl)ethan-1-ol:** known compound;<sup>5</sup> 85% yield (6.89 mmol scale, 1.00 g); brown solid; mp: 187-189 °C;  $R_f$  = 0.23 (*n*-hexane-EtOAc, 85:15); IR (neat): 3384, 2918, 1456, 1384, 1293 cm<sup>-1</sup>; <sup>1</sup>H NMR (400.13 MHz) (CDCl<sub>3</sub>): δ 8.43 (br s, 1 H), 7.58 (d,  $J$  = 8.0 Hz, 1 H), 7.33 (dd,  $J_1$  = 8.0 Hz,  $J_2$  = 0.5 Hz, 1 H), 7.17 (td,  $J_1$  = 7.3 Hz,  $J_2$  = 1.1 Hz, 1 H), 7.10 (td,  $J_1$  = 7.3 Hz,  $J_2$  = 1.1 Hz, 1 H), 6.35-6.34 (m, 1 H), 5.07 (q,  $J$  = 6.4 Hz, 1 H), 2.12 (br s, 1 H),

1.63 (d,  $J = 6.4$  Hz, 3 H);  $^{13}\text{C}$  NMR (100.6 MHz) ( $\text{CDCl}_3$ ):  $\delta$  142.2 (C), 136.0 (C), 128.3 (C), 122.1 (CH), 120.6 (CH), 120.0 (CH), 111.0 (CH), 98.5 (CH), 64.7 (CH), 23.4 ( $\text{CH}_3$ ); HRMS:  $m/z$   $[\text{M} - \text{H}]^-$  calcd for  $\text{C}_{10}\text{H}_{10}\text{NO}$ : 160.0768; found: 160.0763.

#### STEP 2: synthesis of 1-(1*H*-indol-2-yl)ethyl acetate (**4b**)

To a stirred solution of 1-(1*H*-indol-2-yl)ethan-1-ol (1.00 g, 6.20 mmol, 1.0 equiv) and DMAP (75.7 mg, 0.62 mmol, 0.1 equiv) in THF (10 mL) acetic anhydride (935  $\mu\text{L}$ , 9.33 mmol, 1.5 equiv) was added at 0 °C and the resulting mixture was allowed to warm to rt. After 1 hour, the reaction was diluted with  $\text{Et}_2\text{O}$ , washed with a saturated  $\text{NaHCO}_3$  solution and with brine. The combined organic layer was dried over  $\text{Na}_2\text{SO}_4$ , filtered, and concentrated under reduced pressure. The resulting compound **4b** was used in the next step without further purification (2.09 g, 98% yield).

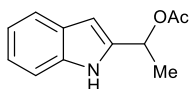

**1-(1*H*-indol-2-yl)ethyl acetate (**4b**):** 96% yield (6.20 mmol scale, 1.18 g); brown solid; mp: 209-211 °C;  $R_f = 0.23$  ( $n$ -hexane-EtOAc, 80:20); IR (neat): 3330, 2918, 1713, 1455, 1384  $\text{cm}^{-1}$ ;  $^1\text{H}$  NMR (400.13 MHz) ( $\text{CDCl}_3$ ):  $\delta$  = 8.60 (br s, 1 H), 7.60 (d,  $J = 8.0$  Hz, 1 H), 7.35 (dd,  $J_1 = 8.2$  Hz,  $J_2 = 0.7$  Hz, 1 H), 7.19 (td,  $J_1 = 7.2$  Hz,  $J_2 = 1.1$  Hz, 1 H), 7.10 (td,  $J_1 = 7.2$  Hz,  $J_2 = 1.1$  Hz, 1 H), 6.53-6.53 (m, 1 H), 6.07 (q,  $J = 6.4$  Hz, 1 H), 2.09 (s, 3 H), 1.74 (d,  $J = 6.4$  Hz, 3 H);  $^{13}\text{C}$  NMR (100.6 MHz) ( $\text{CDCl}_3$ ):  $\delta$  172.1 (C), 138.0 (C), 136.1 (C), 127.5 (CH), 122.7 (CH), 121.0 (CH), 120.1, 111.2 (CH), 100.7, 66.5 (CH), 21.4 ( $\text{CH}_3$ ), 18.7 ( $\text{CH}_3$ ); HRMS:  $m/z$   $[\text{M} + \text{H}]^+$  calcd for  $\text{C}_{12}\text{H}_{14}\text{NO}_2$ : 226.0838; found: 226.0838.

#### 1.5. General procedure for the preparation of (1*H*-indol-2-yl)methyl ethyl carbonate (**1b**)

(1*H*-indol-2-yl)methyl ethyl carbonate **1b** is prepared according to the two-step sequence outlined in Scheme 5 and previously optimized in our laboratory.

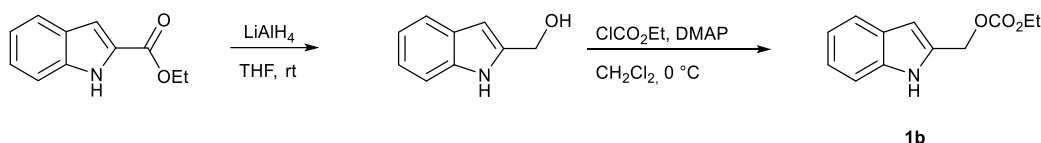

Scheme 5

##### 1.5.a Typical procedure for the preparation of (1*H*-indol-2-yl)methyl ethyl carbonate (**1b**)

###### STEP 1: synthesis of (1*H*-indol-2-yl)methanol

(1*H*-indol-2-yl)methanol was synthesized according to the typical procedures outlined for **1a**, step 1.

###### STEP 2: synthesis of (1*H*-indol-2-yl)methyl ethyl carbonate (**1b**)

To a stirred solution of 1-(1*H*-indol-2-yl)ethan-1-ol (700.0 mg, 4.76 mmol, 1.0 equiv) and DMAP (581.0 mg, 4.76 mmol, 1.0 equiv) in  $\text{CH}_2\text{Cl}_2$  (10 mL) ethyl chloroformate (455  $\mu\text{L}$ , 4.76 mmol, 1.0 equiv) was added at 0 °C and the resulting mixture was allowed to warm to rt. After 4 hours, the reaction was diluted with  $\text{CH}_2\text{Cl}_2$ , washed with a solution of  $\text{KHSO}_4$  (10% w/w) and with brine. The organic phase was dried over  $\text{Na}_2\text{SO}_4$ , filtered, and concentrated under reduced pressure. The residue was purified by chromatography on neutral  $\text{Al}_2\text{O}_3$  (Brockmann activity I) (60 Å pore size), eluting with a 90/10 (v/v)  $n$ -hexane/EtOAc mixture ( $R_f = 0.17$ ) to obtain 490.0 mg (47% yield) of (1*H*-indol-2-yl)methyl ethyl carbonate (**1b**).

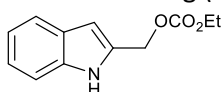

**(1*H*-indol-2-yl)methyl ethyl carbonate (**1b**):** 47% yield (4.76 mmol scale, 700.0 mg); yellow oil;  $R_f = 0.17$  ( $n$ -hexane-EtOAc, 90:10); IR (neat):  $\nu$ : 3353, 1778, 1454, 1235, 1032, 815  $\text{cm}^{-1}$ ;  $^1\text{H}$  (400.13 MHz) ( $\text{CDCl}_3$ ):  $\delta$  = 8.67 (br s, 1 H), 7.64 (dd,  $J_1 = 7.97$  Hz,  $J_2 = 1.0$  Hz, 1 H), 7.39 (dd,  $J_1 = 8.1$  Hz,  $J_2 = 0.9$  Hz, 1 H), 7.24 (td,  $J_1 = 7.51$  Hz,

$J_2 = 1.1$  Hz, 1 H), 7.14 (td,  $J_1 = 7.6$  Hz,  $J_2 = 1.0$  Hz, 1 H), 6.60 (d,  $J = 1.54$  Hz, 1 H), 5.30 (s, 2 H), 4.27 (q,  $J = 7.18$  Hz, 2 H), 1.34 (t,  $J = 7.18$  Hz, 3 H);  $^{13}\text{C}$  NMR (100.6 MHz) ( $\text{CDCl}_3$ ):  $\delta = 156.3$  (C), 136.7 (C), 132.4 (C), 127.7 (C), 123.0 (CH), 121.2 (CH), 120.2 (CH), 111.3 (CH), 104.5 (CH), 64.7 ( $\text{CH}_2$ ), 62.7 ( $\text{CH}_2$ ), 14.4 ( $\text{CH}_3$ ).

## 2. CHARACTERIZATION DATA OF STARTING MATERIALS

### 2.1. Characterization data of ethyl 3-and 5-aryl 1H-indole-2-carboxylate

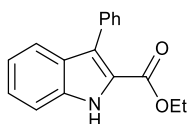

**ethyl 3-phenyl-1H-indole-2-carboxylate:** known compound; 85% yield (7.52 mmol scale, 1.69 g); yellow solid; mp: 133-135 °C; lit.<sup>3</sup> mp: 133-135 °C;  $R_f = 0.23$  (*n*-hexane-EtOAc, 80:20); IR (neat): 3331, 2916, 1675, 1383, 1254  $\text{cm}^{-1}$ ;  $^1\text{H}$  NMR (400.13 MHz) ( $\text{CDCl}_3$ ):  $\delta = 9.04$  (br s, 1 H), 7.65 (d,  $J = 8.4$  Hz, 1 H), 7.58-7.55 (m, 2 H), 7.48-7.44 (m, 3 H), 7.41-7.35 (m, 2 H), 7.18-7.14 (m, 1 H), 4.30 (q,  $J = 7.2$  Hz, 2 H), 1.24 (t,  $J = 7.2$  Hz, 3 H);  $^{13}\text{C}$  NMR (100.6 MHz) ( $\text{CDCl}_3$ ):  $\delta = 162.1$  (C), 135.8 (C), 130.8 (C), 128.1 (CH), 127.9 (CH), 127.3 (CH), 125.9, 124.4, 122.9, 121.9, 121.0, 111.8 (CH), 61.0 (CH), 14.2 ( $\text{CH}_2$ ); HRMS:  $m/z$  [ $\text{M} + \text{Na}$ ] $^+$  calcd for  $\text{C}_{17}\text{H}_{15}\text{NO}_2\text{Na}$ : 288.0995; found: 288.0991.

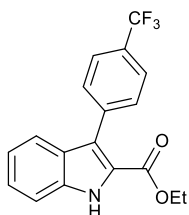

**ethyl 3-(4-(trifluoromethyl)phenyl)-1H-indole-2-carboxylate:** 70% yield (7.52 mmol scale, 1.75 g); brown solid; mp: 133-135 °C;  $R_f = 0.21$  (*n*-hexane-EtOAc, 80:20); IR (neat): 3328, 2933, 1676, 1384, 1255  $\text{cm}^{-1}$ ;  $^1\text{H}$  NMR (400.13 MHz) ( $\text{CDCl}_3$ ):  $\delta = 9.21$  (br s, 1 H), 7.73-7.68 (m, 4 H), 7.60 (d,  $J = 8.1$  Hz, 1 H), 7.48 (d,  $J = 8.1$  Hz, 1 H), 7.41-7.37 (m, 1 H), 7.21-7.17 (m, 2 H), 4.30 (q,  $J = 7.2$  Hz, 2 H), 1.24 (t,  $J = 7.2$  Hz, 3 H);  $^{13}\text{C}$  NMR (100.6 MHz) ( $\text{CDCl}_3$ ):  $\delta = 161.7$  (C), 137.5 (C), 135.7 (C), 131.0 (CH), 129.2 (q,  $J_{\text{CF}} = 31.9$  Hz, C), 127.6 (C), 126.1 (CH), 124.6 (q,  $J_{\text{CF}} = 3.7$  Hz, CH), 124.4 (q,  $J_{\text{CF}} = 272.3$  Hz, C), 123.1 (C), 122.6 (C), 121.33 (CH), 121.28 (CH), 111.9 (CH), 61.2 ( $\text{CH}_2$ ), 14.1 ( $\text{CH}_3$ );  $^{19}\text{F}$  NMR (376.5 MHz) ( $\text{CDCl}_3$ ):  $\delta = -62.4$ ; HRMS:  $m/z$  [ $\text{M} + \text{Na}$ ] $^+$  calcd for  $\text{C}_{18}\text{H}_{14}\text{F}_3\text{NO}_2\text{Na}$ : 356.0869; found: 356.0871.

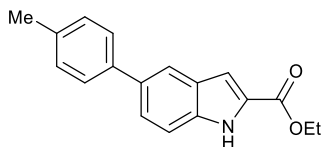

**ethyl 5-(p-tolyl)-1H-indole-2-carboxylate:** 80% yield (5.0 mmol scale, 1.12 g), yellow solid; mp: 178-180 °C;  $R_f = 0.23$  (*n*-hexane-EtOAc, 80:20); IR (KBr): 3321.8, 2903.5, 1692.2, 1383.7, 1186.1;  $^1\text{H}$  NMR (400.13 MHz) ( $\text{CDCl}_3$ ):  $\delta = 9.32$  (bs, 1 H), 7.90 (s, 1 H), 7.63-7.58 (m, 3 H), 7.52 (d,  $J = 8.8$  Hz, 1 H), 7.31-7.29 (m, 3 H), 4.50 (q,  $J = 6.8$  Hz, 2 H), 2.45 (s, 3 H), 1.49 (d,  $J = 7.2$  Hz, 3 H);  $^{13}\text{C}$  NMR (100.6 MHz) ( $\text{CDCl}_3$ ):  $\delta = 162.3$  (C), 139.1 (C), 136.4 (C), 134.3 (C), 129.5 (CH), 128.1 (C), 127.2 (CH), 125.4 (CH), 120.5 (CH), 112.1 (CH), 108.9 (CH), 61.1 ( $\text{CH}_2$ ), 21.1 ( $\text{CH}_3$ ), 14.4 ( $\text{CH}_3$ ). HRMS:  $m/z$  [ $\text{M} + \text{H}$ ] $^+$  calcd for  $\text{C}_{18}\text{H}_{18}\text{NO}_2$ : 280.1332; found: 280.1317.

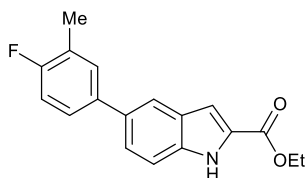

**ethyl 5-(4-fluoro-3-methylphenyl)-1H-indole-2-carboxylate:** 83% yield (5.2 mmol scale, 1.28 g), yellow solid; mp: 98-100 °C;  $R_f$  = 0.21 (*n*-hexane-EtOAc, 80:20); IR (KBr): 3366.1, 2918.7, 1712.5, 1472.4, 1384.6, 1265.1;  $^1\text{H}$  NMR (400.13 MHz) (DMSO- $d_6$ ):  $\delta$  = 11.95 (s, 1 H), 7.89 (s, 1 H), 7.59-7.46 (m, 4 H), 7.21-7.17 (m, 2 H), 4.36 (q,  $J$  = 7.08 Hz, 2 H), 2.31 (d,  $J$  = 1.4 Hz, 3 H), 1.36 (t,  $J$  = 7.08 Hz, 3 H);  $^{13}\text{C}$  NMR (100.6 MHz) (DMSO- $d_6$ ):  $\delta$  = 161.2, 159.9 (d,  $J$  = 241.5 Hz) (C), 158.8, 137.3 (d, 3.2 Hz), 136.8, 131.8, 129.9 (d,  $J$  = 5.0 Hz) (CH), 128.0, 127.2, 125.8 (d,  $J$  = 7.9 Hz) (CH), 124.4 (d,  $J$  = 17.0 Hz) (C), 124.1 (CH), 119.8 (CH), 115.5 (d,  $J$  = 22.0 Hz) (CH), 113.0 (CH), 108.0 (CH), 60.5 (CH<sub>2</sub>), 14.3 (CH<sub>3</sub>), 14.3 (CH<sub>3</sub>);  $^1\text{H}$ -coupled  $^{19}\text{F}$  (376.5 MHz) (CDCl<sub>3</sub>):  $\delta$  = -121.0 (hept,  $J$  = 3.0 Hz). HRMS:  $m/z$  [M + Na]<sup>+</sup> calcd for C<sub>18</sub>H<sub>16</sub>FN<sub>2</sub>O<sub>2</sub>Na: 320.1057; found: 320.1051.

## 2.2. Characterization data of (1H-indol-2-yl)methanols

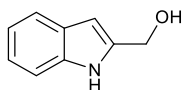

**(1H-indol-2-yl)methanol:** known compound; 95% yield (7.93 mmol scale, 1.11 g); yellow solid; lit.<sup>1</sup> mp: 70-72 °C; mp: 72.5-73.5 °C;  $R_f$  = 0.23 (*n*-hexane-EtOAc, 80:20); IR (neat): 3373, 2856, 1617, 1453, 1289, 1004 cm<sup>-1</sup>;  $^1\text{H}$  NMR: (400.13 MHz) (DMSO- $d_6$ ):  $\delta$  11.0 (s, 1 H), 7.46 (d,  $J$  = 7.8 Hz, 1 H), 7.33 (dd,  $J_1$  = 7.8 Hz,  $J_2$  = 0.7 Hz, 1 H), 7.03 (td,  $J_1$  = 8.0 Hz,  $J_2$  = 1.2 Hz, 1 H), 6.94 (td,  $J_1$  = 8.0 Hz,  $J_2$  = 1.2 Hz, 1 H), 6.27 (d,  $J$  = 1.2 Hz, 1 H), 5.22 (t,  $J$  = 5.6 Hz, 1 H), 4.61 (d,  $J$  = 5.6 Hz, 2 H);  $^{13}\text{C}$  NMR (100.6 MHz) (DMSO- $d_6$ ):  $\delta$  140.6 (C), 136.7 (C), 128.3 (C), 121.0 (CH), 120.1 (CH), 119.1 (CH), 111.5 (CH), 98.9 (CH), 57.4 (CH<sub>2</sub>); HRMS:  $m/z$  [M + H]<sup>+</sup> calcd for C<sub>9</sub>H<sub>10</sub>NO: 146.0611; found: 146.0599.

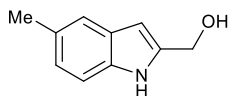

**(5-methyl-1H-indol-2-yl)methanol:** known compound; 98% yield (7.93 mmol scale, 1.25 g); orange solid; lit.<sup>1</sup> mp: 77-79 °C; mp: 77-79 °C;  $R_f$  = 0.25 (*n*-hexane-EtOAc, 75:25); IR (neat): 3346, 2932, 1623, 1487, 1197, 1025 cm<sup>-1</sup>;  $^1\text{H}$  NMR (400.13 MHz) (CDCl<sub>3</sub>):  $\delta$  8.15 (bs, 1 H), 7.28 (s, 1 H), 7.12 (d,  $J$  = 8.3 Hz, 1 H), 6.93 (d,  $J$  = 8.3 Hz, 1 H), 6.23 (br s, 1 H), 4.67 (s, 2 H), 2.36 (s, 3 H), 1.94 (bs, 1 H);  $^{13}\text{C}$  NMR (100.6 MHz) (CDCl<sub>3</sub>):  $\delta$  137.6 (C), 134.7 (C), 129.2 (C), 128.4 (C), 123.8 (CH), 120.3 (CH), 110.6 (CH), 100.1 (CH), 58.8 (CH<sub>2</sub>), 21.4 (CH<sub>3</sub>); HRMS:  $m/z$  [M + H]<sup>+</sup> calcd for C<sub>10</sub>H<sub>12</sub>NO: 162.0913; found: 162.0917.

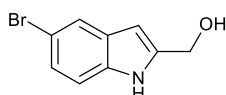

**(5-bromo-1H-indol-2-yl)methanol:** known compound; 98% yield (7.93 mmol scale, 1.76 g); brown solid; lit.<sup>2</sup> mp: 115-117 °C; mp: 113-114 °C;  $R_f$  = 0.23 (*n*-hexane-EtOAc, 75:25); IR (neat): 3317, 2892, 1699, 1522, 1383, 1197 cm<sup>-1</sup>;  $^1\text{H}$  NMR (400.13 MHz) (DMSO- $d_6$ ):  $\delta$  11.3 (br s, 1 H), 7.67 (d,  $J$  = 1.7 Hz, 1 H), 7.32 (d,  $J$  = 8.7 Hz, 1 H), 7.17 (dd,  $J_1$  = 8.7 Hz,  $J_2$  = 1.7 Hz, 1 H), 6.30 (s, 1 H), 5.35 (t,  $J$  = 5.5 Hz, 1 H), 4.65 (d,  $J$  = 5.5 Hz, 2 H);  $^{13}\text{C}$  NMR (100.6 MHz) (DMSO- $d_6$ ):  $\delta$  142.0 (C), 134.9 (C), 129.8 (C), 122.9 (CH), 121.8 (CH), 113.0 (CH), 111.2 (C), 98.1 (CH), 56.8 (CH<sub>2</sub>); HRMS:  $m/z$  [M + H]<sup>+</sup> calcd for C<sub>9</sub>H<sub>9</sub>BrNO: 223.9716; found: 223.9710.

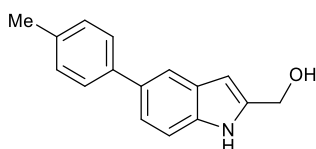

**(5-(p-tolyl)-1H-indol-2-yl)methanol:** 75% yield (5.8 mmol scale, 1.03 g); brown solid; mp: 126-128 °C;  $R_f$  = 0.25 (*n*-hexane-EtOAc, 75:25); IR (KBr): 3258.1, 2917.8, 1580.4, 1384.6, 1088.6;  $^1\text{H}$  NMR (400.13 MHz) (DMSO- $d_6$ ):  $\delta$  = 11.04 (s, 1 H), 7.71 (t,  $J$  = 0.6 Hz, 1 H), 7.54 (d,  $J$  = 8.1 Hz, 2 H), 7.41-7.37 (m, 1 H), 7.34-7.30 (m, 1 H), 7.23 (d,  $J$  = 8.0 Hz, 2 H), 6.32 (d,  $J$  = 1.1 Hz, 1 H), 5.26 (t,  $J$  = 5.5 Hz, 1 H), 4.62 (d,  $J$  = 5.6 Hz, 2 H), 2.34 (s, 3 H);  $^{13}\text{C}$  NMR (100.6 MHz) (DMSO- $d_6$ ):  $\delta$  = 141.4, 139.6, 136.2, 135.6 (CH), 131.6, 129.8 (CH), 128.5 (CH), 126.9 (CH), 120.3 (CH), 117.9 (CH), 111.9 (CH), 99.4 (CH), 57.4 (CH<sub>2</sub>), 21.1 (CH<sub>3</sub>). HRMS:  $m/z$  [M + Na]<sup>+</sup> calcd for C<sub>16</sub>H<sub>15</sub>NONa: 260.1046; found: 260.1050.

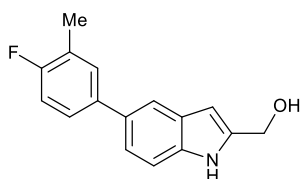

**(5-(4-fluoro-3-methylphenyl)-1H-indol-2-yl)methanol:** 73% yield (4.3 mmol scale, 1.04 g); yellow solid; mp: 123-125 °C;  $R_f$  = 0.22 (*n*-hexane-EtOAc, 75:25); IR (KBr): 3361.0, 3361.7, 3033.1, 2921.4,  $^1\text{H}$  NMR (400.13 MHz) (CDCl<sub>3</sub>):  $\delta$  = 8.40 (bs, 1 H), 7.72 (s, 1 H), 7.44-7.35 (m, 4 H), 7.05 (t,  $J$  = 8.77 Hz, 1 H), 6.44 (d,  $J$  = 1.25 Hz, 1 H), 4.85 (s, 2 H), 2.35 (d,  $J$  = 1.58 Hz, 3 H);  $^{13}\text{C}$  NMR (100.6 MHz) (CDCl<sub>3</sub>):  $\delta$  = 161.0 (d,  $J$  = 241.5 Hz) (C), 138.5, 138.4 (d,  $J$  = 3.2 Hz) (C), 135.9 (C), 132.9 (C), 130.5 (d,  $J$  = 5.0 Hz), 128.8 (C), 126.2 (d,  $J$  = 8.0 Hz) (CH), 124.9 (d,  $J$  = 17.5 Hz) (C), 122.0 (CH), 119.1 (CH), 115.19 (d,  $J$  = 22.0 Hz) (C), 111.2 (CH), 100.9 (CH), 58.9 (CH<sub>2</sub>), 21.2 (CH<sub>3</sub>), 14.9 (d,  $J$  = 3.5 Hz);  $^1\text{H}$ -coupled  $^{19}\text{F}$  (376.5 MHz) (CDCl<sub>3</sub>):  $\delta$  = -121.7 (hept,  $J$  = 3.0 Hz). HRMS:  $m/z$  [M - H]<sup>-</sup> calcd for C<sub>16</sub>H<sub>13</sub>FNO: 254.0984; found: 254.0982.

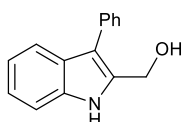

**(3-phenyl-1H-indol-2-yl)methanol:** known compound; 81% yield (6.37 mmol scale, 1.15 g); brown solid; lit. <sup>3</sup> mp: 98-100 °C; mp: 99-100 °C;  $R_f$  = 0.25 (*n*-hexane-EtOAc, 70:30); IR (neat): 3391, 2917, 1730, 1456, 1384, 1231 cm<sup>-1</sup>;  $^1\text{H}$  NMR: (400.13 MHz) (CDCl<sub>3</sub>):  $\delta$  8.56 (br s, 1 H), 7.73 (d,  $J$  = 8.4 Hz, 1 H), 7.48-7.46 (m, 4 H), 7.37-7.33 (m, 2 H), 7.24 (dt,  $J_1$  = 8.0 Hz,  $J_2$  = 1.1 Hz, 1 H), 7.16 (dt,  $J_1$  = 8.0 Hz,  $J_2$  = 1.1 Hz, 1 H), 4.89 (s, 2 H);  $^{13}\text{C}$  NMR (100.6 MHz) (CDCl<sub>3</sub>):  $\delta$  135.7 (C), 134.6 (C), 133.7 (C), 129.5 (CH), 128.8 (CH), 127.4 (C), 126.5 (CH), 122.7 (CH), 120.4 (CH), 119.7 (CH), 115.4 (C), 111.2 (CH), 57.2 (CH<sub>2</sub>); HRMS:  $m/z$  [M + H]<sup>+</sup> calcd for C<sub>15</sub>H<sub>13</sub>NO: 222.0924; found: 222.0917.

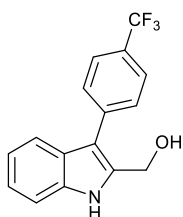

**(3-(4-(trifluoromethyl)phenyl)-1H-indol-2-yl)methanol:** 98% yield (6.37 mmol scale, 1.57 g); yellow solid; mp: 141 – 143 °C;  $R_f$  = 0.21 (*n*-hexane-EtOAc, 75:25); IR (neat): 3365, 2917, 1703, 1484, 1385 cm<sup>-1</sup>;  $^1\text{H}$  NMR

(400.13 MHz) (DMSO-*d*<sub>6</sub>):  $\delta$  11.5 (br s, 1 H), 7.81 (d, *J* = 8.3 Hz, 2 H), 7.76 (d, *J* = 8.3 Hz, 2 H), 7.66 (d, *J* = 7.9 Hz, 1 H), 7.45 (d, *J* = 7.9 Hz, 1 H), 7.15 (dt, *J*<sub>1</sub> = 7.5 Hz, *J*<sub>2</sub> = 1.2 Hz, 1 H), 7.07 (dt, *J*<sub>1</sub> = 7.5 Hz, *J*<sub>2</sub> = 1.2 Hz, 1 H), 5.47 (t, *J* = 5.42 Hz, 1 H), 4.69 (d, *J* = 5.42 Hz, 2 H), <sup>13</sup>C NMR (100.6 MHz) (DMSO-*d*<sub>6</sub>):  $\delta$  139.6 (C), 137.2 (C), 135.6 (C), 129.1 (C), 126.1 (CH), 125.9 (q, *J*<sub>CF</sub> = 8.3 Hz, C), 125.4 (q, *J*<sub>CF</sub> = 3.2 Hz, CH), 124.3 (q, *J*<sub>CF</sub> = 232.5 Hz, C), 121.6 (CH), 119.7 (CH), 118.2 (CH), 111.7 (CH), 111.3 (C), 55.2 (CH<sub>2</sub>); <sup>19</sup>F NMR (376.5 MHz) (DMSO-*d*<sub>6</sub>):  $\delta$  -60.5; HRMS: *m/z* [M + H]<sup>+</sup> calcd for C<sub>16</sub>H<sub>12</sub>F<sub>3</sub>NO: 290.0798; found: 290.0793.

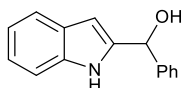

**(1*H*-indol-2-yl)(phenyl)methanol**: known compound;<sup>4</sup> 90% yield (6.89 mmol scale, 1.38 g); brown solid; mp: 80-82 °C; *R*<sub>f</sub> = 0.24 (*n*-hexane-EtOAc, 80:20); IR (neat): 3391, 2917, 1454, 1384 cm<sup>-1</sup>; <sup>1</sup>H NMR (400.13 MHz) (CDCl<sub>3</sub>):  $\delta$  8.45 (br s, 1 H), 7.67 (d, *J* = 8.4 Hz, 1 H), 7.43 (br s, 5 H), 7.29-7.22 (m, 3 H), 6.32 (d, *J* = 1.7 Hz, 1 H), 5.85 (s, 1 H), 3.80 (br s 1 H); <sup>13</sup>C NMR (100.6 MHz) (CDCl<sub>3</sub>):  $\delta$  141.5 (C), 140.1 (C), 136.2 (C), 128.6 (CH), 128.1 (CH), 127.9 (C), 126.6 (CH), 122.1 (CH), 120.6 (CH), 119.9 (CH), 111.2 (CH), 101.0 (CH), 70.6 (CH HRMS: *m/z* [M + H]<sup>+</sup> calcd for C<sub>15</sub>H<sub>13</sub>NO: 222.0924; found: 222.0920.

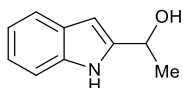

**1-(1*H*-indol-2-yl)ethan-1-ol**: known compound;<sup>5</sup> 85% yield (6.89 mmol scale, 1.00 g); brown solid; mp: 187-189 °C; *R*<sub>f</sub> = 0.23 (*n*-hexane-EtOAc, 85:15); IR (neat): 3384, 2918, 1456, 1384, 1293 cm<sup>-1</sup>; <sup>1</sup>H NMR (400.13 MHz) (CDCl<sub>3</sub>):  $\delta$  8.43 (br s, 1 H), 7.58 (d, *J* = 8.0 Hz, 1 H), 7.33 (dd, *J*<sub>1</sub> = 8.0 Hz, *J*<sub>2</sub> = 0.5 Hz, 1 H), 7.17 (td, *J*<sub>1</sub> = 7.3 Hz, *J*<sub>2</sub> = 1.1 Hz, 1 H), 7.10 (td, *J*<sub>1</sub> = 7.3 Hz, *J*<sub>2</sub> = 1.1 Hz, 1 H), 6.35-6.34 (m, 1 H), 5.07 (q, *J* = 6.4 Hz, 1 H), 2.12 (br s, 1 H), 1.63 (d, *J* = 6.4 Hz, 3 H); <sup>13</sup>C NMR (100.6 MHz) (CDCl<sub>3</sub>):  $\delta$  142.2 (C), 136.0 (C), 128.3 (C), 122.1 (CH), 120.6 (CH), 120.0 (CH), 111.0 (CH), 98.5 (CH), 64.7 (CH), 23.4 (CH<sub>3</sub>); HRMS: *m/z* [M + H]<sup>+</sup> calcd for C<sub>10</sub>H<sub>12</sub>NO: 160.0768; found: 160.0763.



### 3. HF CALCULATION ON DIASTEREISOMERS 5a and 5'a

Stereoisomer trans **5a**

```
+-----+
| Jaguar version 3.5, release 42 |
|                               |
| Copyright 1991-1998 Schrodinger, Inc. |
| All Rights Reserved. |
|                               |
| Use of this program should be acknowledged in publications as: |
| Jaguar 3.5, Schrodinger, Inc., Portland, Oregon, 1998. |
+-----+
```

start of program pre

Job name: WF22711

Executables used: C:\USERS\GIANCARLO\DOCUMENTS\1.

Temporary files : LAVORO\C.

Input file comments:

Molecule001

This file created by Spartan

basis set: 3-21g\*

net molecular charge: 0

multiplicity: 1

number of basis functions.... 210

Input geometry:

|      | angstroms     |               |               |
|------|---------------|---------------|---------------|
| atom | x             | y             | z             |
| H25  | 1.4305660000  | -4.1002650000 | -1.7682800000 |
| C1   | 1.7700830000  | -3.0769040000 | -1.8989670000 |
| C2   | 2.6834000000  | -0.4226530000 | -2.2679760000 |
| C3   | 1.3067540000  | -2.0562360000 | -1.0459710000 |
| C4   | 2.6617890000  | -2.7592810000 | -2.9307910000 |
| C5   | 3.0982300000  | -1.4495770000 | -3.1191010000 |
| C6   | 1.7955430000  | -0.7532560000 | -1.2361580000 |
| C7   | 0.3695020000  | -2.0264770000 | 0.0382450000  |
| H27  | 3.0110100000  | -3.5439180000 | -3.5976230000 |
| H28  | 3.7771430000  | -1.2204340000 | -3.9375210000 |
| H30  | 3.0319160000  | 0.5969730000  | -2.4085260000 |
| C8   | 0.3110510000  | -0.7248790000 | 0.4542730000  |
| H32  | -0.2073950000 | -2.8584000000 | 0.4208600000  |
| C10  | -0.3976590000 | 0.1542770000  | 1.4065070000  |
| N2   | 1.2434290000  | 0.0050510000  | -0.2385740000 |
| C9   | 1.3934880000  | 1.3060500000  | 0.2091370000  |
| O1   | 2.1352170000  | 2.1153060000  | -0.3169060000 |
| H43  | -0.4734580000 | -0.3350340000 | 2.3854890000  |
| C12  | -1.7863570000 | 0.5666440000  | 0.9317860000  |
| C11  | 0.5494920000  | 1.4038750000  | 1.4736160000  |
| C18  | 1.4733880000  | 1.3487920000  | 2.6887000000  |
| H48  | -0.0079500000 | 2.3470800000  | 1.4746980000  |
| C13  | -3.3041190000 | 1.4274480000  | -0.7748770000 |
| C14  | -4.1123880000 | 1.0546210000  | 1.4633490000  |
| C15  | -4.3403640000 | 1.4665450000  | 0.1522890000  |
| C16  | -2.8455660000 | 0.6093050000  | 1.8517350000  |
| C17  | -2.0384750000 | 0.9812200000  | -0.3898970000 |
| H51  | -5.3236280000 | 1.8190210000  | -0.1462460000 |
| H52  | -2.6949690000 | 0.3062060000  | 2.8836370000  |
| H55  | -3.4749370000 | 1.7484370000  | -1.7984360000 |
| H56  | -4.9199500000 | 1.0865410000  | 2.1868960000  |
| H59  | -1.2571140000 | 0.9704440000  | -1.1443360000 |

|     |              |              |              |
|-----|--------------|--------------|--------------|
| H60 | 2.0921750000 | 0.4437910000 | 2.6861280000 |
| H61 | 0.8954860000 | 1.3633680000 | 3.6180520000 |
| H62 | 2.1546680000 | 2.2063210000 | 2.6947870000 |

Molecular weight: 261.12 amu

Stoichiometry: C18NH15O

Molecular Point Group: C1

Point Group used: C1

nuclear repulsion energy..... 1452.357863535 hartrees

Non-default options chosen:

Geometry will be optimized in redundant internal coordinates

Initial Hessian: from previous calculation

end of program pre

start of program onee

smallest eigenvalue of S: 1.277E-03

number of canonical orbitals..... 210

end of program onee

start of program hfig

initial wavefunction generated automatically from atomic wavefunctions

| Irreducible representation | Total no orbitals | No of occupied orbitals |
|----------------------------|-------------------|-------------------------|
|                            |                   | Shell_1 Shell_2 ...     |
| No Symm                    | 210               | 69                      |

-----  
Orbital occupation/shell 1.000

end of program hfig

start of program probe

end of program probe

start of program grid

number of gridpoints:

| atom     | H25 | C1  | C2  | C3  | C4  | C5  | C6  | C7  |
|----------|-----|-----|-----|-----|-----|-----|-----|-----|
| grid # 1 | 73  | 89  | 89  | 91  | 87  | 87  | 84  | 87  |
| grid # 2 | 106 | 100 | 100 | 100 | 100 | 100 | 95  | 93  |
| grid # 3 | 224 | 186 | 186 | 195 | 184 | 184 | 190 | 182 |
| grid # 4 | 223 | 382 | 381 | 401 | 380 | 379 | 374 | 382 |

number of gridpoints:

| atom     | H27 | H28 | H30 | C8  | H32 | C10 | N2  | C9  |
|----------|-----|-----|-----|-----|-----|-----|-----|-----|
| grid # 1 | 73  | 73  | 73  | 82  | 73  | 81  | 98  | 77  |
| grid # 2 | 106 | 106 | 105 | 91  | 106 | 88  | 106 | 81  |
| grid # 3 | 224 | 224 | 220 | 191 | 224 | 169 | 221 | 165 |
| grid # 4 | 224 | 224 | 219 | 377 | 229 | 350 | 400 | 329 |

number of gridpoints:

| atom     | O1  | H43 | C12 | C11 | C18 | H48 | C13 | C14 |
|----------|-----|-----|-----|-----|-----|-----|-----|-----|
| grid # 1 | 112 | 69  | 92  | 82  | 72  | 71  | 88  | 89  |
| grid # 2 | 127 | 99  | 106 | 92  | 75  | 101 | 100 | 100 |
| grid # 3 | 270 | 209 | 194 | 176 | 143 | 217 | 184 | 185 |
| grid # 4 | 473 | 207 | 405 | 352 | 306 | 210 | 380 | 380 |

number of gridpoints:

|          |     |     |     |     |     |     |     |     |
|----------|-----|-----|-----|-----|-----|-----|-----|-----|
| atom     | C15 | C16 | C17 | H51 | H52 | H55 | H56 | H59 |
| grid # 1 | 89  | 87  | 86  | 73  | 73  | 73  | 73  | 73  |
| grid # 2 | 100 | 99  | 98  | 106 | 104 | 106 | 106 | 101 |
| grid # 3 | 185 | 183 | 182 | 224 | 216 | 224 | 224 | 217 |
| grid # 4 | 380 | 380 | 381 | 224 | 215 | 224 | 224 | 214 |

number of gridpoints:

|          |     |     |     |       |
|----------|-----|-----|-----|-------|
| atom     | H60 | H61 | H62 | total |
| grid # 1 | 72  | 71  | 72  | 2834  |
| grid # 2 | 98  | 99  | 98  | 3498  |
| grid # 3 | 217 | 217 | 220 | 7056  |
| grid # 4 | 223 | 223 | 226 | 10881 |

end of program grid

start of program rwr

recomputing RwR matrix 15 grid: 4

end of program rwr

start of program scf

|                               |     |
|-------------------------------|-----|
| number of electrons.....      | 138 |
| number of alpha electrons.... | 69  |
| number of beta electrons..... | 69  |
| number of orbitals, total.... | 210 |
| number of core orbitals.....  | 69  |
| number of open shell orbs.... | 0   |
| number of occupied orbitals.. | 69  |
| number of virtual orbitals... | 141 |
| number of hamiltonians.....   | 1   |
| number of shells.....         | 1   |

SCF type: HF

|      | i  | u | d | i | g |                  |          | RMS     | maximum |
|------|----|---|---|---|---|------------------|----------|---------|---------|
|      | t  | p | i | c | r |                  |          | density | DIIS    |
|      | e  | d | i | u | i |                  | energy   | change  | error   |
|      | r  | t | s | t | d | total energy     | change   |         |         |
| etot | 1  | N | N | 5 | M | -812.70807322606 |          | 1.1E-01 | 1.6E-01 |
| etot | 2  | Y | Y | 6 | M | -814.63609558920 | 1.9E+00  | 1.2E-02 | 9.5E-02 |
| etot | 3  | Y | Y | 6 | M | -814.96677516606 | 3.3E-01  | 3.7E-02 | 6.2E-02 |
| etot | 4  | N | Y | 2 | U | -814.18471009137 | -7.8E-01 | 3.4E-02 | 2.3E-01 |
| etot | 5  | N | Y | 2 | U | -814.42871209538 | 2.4E-01  | 2.1E-02 | 1.9E-01 |
| etot | 6  | Y | Y | 6 | M | -814.56019712972 | 1.3E-01  | 5.1E-03 | 1.8E-01 |
| etot | 7  | N | Y | 2 | U | -814.60294150320 | 4.3E-02  | 2.6E-02 | 1.7E-01 |
| etot | 8  | Y | Y | 6 | M | -814.77132966764 | 1.7E-01  | 2.4E-02 | 1.4E-01 |
| etot | 9  | N | Y | 2 | U | -814.94917594918 | 1.8E-01  | 2.4E-02 | 9.5E-02 |
| etot | 10 | Y | Y | 6 | M | -815.09158938124 | 1.4E-01  | 6.6E-03 | 4.8E-02 |
| etot | 11 | N | Y | 2 | U | -815.12806521763 | 3.6E-02  | 1.8E-03 | 1.3E-02 |
| etot | 12 | Y | Y | 6 | M | -815.12961784473 | 1.6E-03  | 1.2E-04 | 9.6E-04 |
| etot | 13 | Y | Y | 6 | M | -815.12967580265 | 5.8E-05  | 4.3E-05 | 4.1E-04 |
| etot | 14 | N | Y | 2 | U | -815.13078749106 | 1.1E-03  | 1.5E-05 | 1.8E-04 |
| etot | 15 | Y | Y | 6 | M | -815.13078613640 | -1.4E-06 | 1.0E-05 | 9.1E-05 |
| etot | 16 | Y | Y | 6 | M | -815.13078432059 | -1.8E-06 | 1.4E-06 | 2.7E-05 |
| etot | 17 | Y | N | 6 | M | -815.13078342452 | -9.0E-07 | 0.0E+00 | 0.0E+00 |

Energy components, in hartrees:

(A) Nuclear repulsion..... 1452.35786353549

(E) Total one-electron terms..... -3990.21675173626  
 (I) Total two-electron terms..... 1722.72810477625  
 (L) Electronic energy..... -2267.48864696001 (E+I)  
 (N) Total energy..... -815.13078342452 (A+L)

SCFE: SCF energy: HF -815.13078342452 hartrees iterations: 17

HOMO energy: -0.28879  
 LUMO energy: 0.11151

Orbital energies:

|           |           |           |           |           |           |
|-----------|-----------|-----------|-----------|-----------|-----------|
| -20.45677 | -15.55469 | -11.32558 | -11.23562 | -11.22365 | -11.21575 |
| -11.21192 | -11.20765 | -11.19144 | -11.18992 | -11.18963 | -11.18893 |
| -11.18698 | -11.18664 | -11.18354 | -11.18296 | -11.18198 | -11.17820 |
| -11.17761 | -11.17541 | -1.42360  | -1.34244  | -1.17799  | -1.15691  |
| -1.11684  | -1.08521  | -1.03960  | -1.02214  | -1.01586  | -0.99456  |
| -0.94492  | -0.90832  | -0.85691  | -0.84027  | -0.82871  | -0.80532  |
| -0.79385  | -0.75915  | -0.71616  | -0.68597  | -0.67827  | -0.67105  |
| -0.65804  | -0.64193  | -0.63545  | -0.62291  | -0.60637  | -0.60517  |
| -0.59865  | -0.59409  | -0.58703  | -0.57764  | -0.56508  | -0.55696  |
| -0.54334  | -0.52608  | -0.51383  | -0.50745  | -0.49721  | -0.49452  |
| -0.49177  | -0.48535  | -0.45707  | -0.42549  | -0.39058  | -0.34684  |
| -0.33964  | -0.31403  | -0.28879  | 0.11151   | 0.12858   | 0.13914   |
| 0.14162   | 0.20288   | 0.22529   | 0.25715   | 0.26624   | 0.27025   |
| 0.29633   |           |           |           |           |           |

end of program scf

start of program derla  
 end of program derla

start of program rwr  
 recomputing RwR matrix 15 grid: 4  
 recomputing RwR matrix 20 grid: 4  
 end of program rwr

start of program derlb

forces (hartrees/bohr) : total

| atom | label | x             | y             | z             |
|------|-------|---------------|---------------|---------------|
| 1    | H25   | 2.710098E-03  | 9.931418E-03  | -1.083884E-03 |
| 2    | C1    | 1.235714E-03  | 1.840851E-03  | -4.397112E-03 |
| 3    | C2    | 1.408141E-03  | -2.342416E-03 | -1.320422E-03 |
| 4    | C3    | 1.822657E-02  | -1.445978E-02 | -2.727377E-02 |
| 5    | C4    | -1.069457E-02 | -1.220304E-02 | 9.670448E-03  |
| 6    | C5    | 1.976768E-03  | 1.564055E-02  | 3.180745E-03  |
| 7    | C6    | 2.502822E-02  | -4.654627E-03 | -1.629752E-02 |
| 8    | C7    | -2.298166E-02 | 1.568919E-02  | 2.159439E-02  |
| 9    | H27   | -3.962868E-03 | 8.036541E-03  | 7.320379E-03  |
| 10   | H28   | -7.285149E-03 | -2.059189E-03 | 9.150942E-03  |
| 11   | H30   | -5.228705E-03 | -1.143621E-02 | 5.249053E-03  |
| 12   | C8    | 5.310940E-03  | -4.607515E-02 | -2.723222E-03 |
| 13   | H32   | 5.612024E-03  | 1.003896E-02  | -5.494555E-03 |
| 14   | C10   | -8.285301E-03 | 5.084932E-03  | 2.083598E-02  |
| 15   | N2    | -9.058734E-03 | 2.295617E-02  | -9.589230E-03 |
| 16   | C9    | 1.978109E-02  | 6.704711E-03  | -1.785745E-02 |

|       |       |               |               |               |
|-------|-------|---------------|---------------|---------------|
| 17    | O1    | -1.183584E-02 | -6.856242E-03 | 1.084779E-02  |
| 18    | H43   | -7.914041E-04 | 8.057044E-03  | -8.165723E-03 |
| 19    | C12   | -1.747783E-02 | 4.303977E-03  | -3.829222E-03 |
| 20    | C11   | -1.112166E-02 | 1.051317E-02  | -5.926035E-04 |
| 21    | C18   | 1.505426E-02  | 5.905996E-04  | 1.322731E-02  |
| 22    | H48   | 4.307911E-03  | -1.103483E-02 | -4.529152E-04 |
| 23    | C13   | 4.888378E-03  | -1.733156E-03 | 3.083228E-03  |
| 24    | C14   | 2.448243E-03  | 2.215522E-04  | -1.371246E-03 |
| 25    | C15   | -3.837606E-03 | 3.052164E-04  | 1.637162E-03  |
| 26    | C16   | -8.432890E-04 | 1.767656E-03  | -4.749515E-03 |
| 27    | C17   | 4.349286E-04  | 1.609504E-04  | 3.479221E-04  |
| 28    | H51   | 9.476532E-03  | -3.761478E-03 | 3.273882E-03  |
| 29    | H52   | 8.450141E-04  | 1.629853E-03  | -9.740699E-03 |
| 30    | H55   | 2.183926E-03  | -3.537752E-03 | 1.011807E-02  |
| 31    | H56   | 7.500918E-03  | -7.431302E-04 | -5.950180E-03 |
| 32    | H59   | -4.820475E-03 | -2.401999E-03 | 1.002720E-02  |
| 33    | H60   | -6.455812E-03 | 5.156628E-03  | -1.263196E-03 |
| 34    | H61   | 2.991080E-03  | 5.728372E-04  | -7.238317E-03 |
| 35    | H62   | -5.834737E-03 | -5.494128E-03 | -6.172088E-04 |
| ----- |       |               |               |               |
|       | total | 9.050991E-04  | 4.096720E-04  | -4.434826E-04 |

end of program derlb

start of program geopt 1

geometry optimization step 1  
 reading input hessian of dimension 105  
 in five columns format

Hessian eigenvalues:

|              |             |             |             |             |
|--------------|-------------|-------------|-------------|-------------|
| -1.30831E-03 | 0.00000E+00 | 0.00000E+00 | 0.00000E+00 | 0.00000E+00 |
| 0.00000E+00  | 0.00000E+00 | 0.00000E+00 | 0.00000E+00 | 0.00000E+00 |
| 0.00000E+00  | 0.00000E+00 | 0.00000E+00 | 0.00000E+00 | 0.00000E+00 |
| 0.00000E+00  | 0.00000E+00 | 0.00000E+00 | 0.00000E+00 | 0.00000E+00 |
| 0.00000E+00  | 0.00000E+00 | 0.00000E+00 | 0.00000E+00 | 0.00000E+00 |
| 0.00000E+00  | 0.00000E+00 | 1.44330E-02 | 1.82052E-02 | 2.22167E-02 |
| 2.61081E-02  | 2.83536E-02 | 2.92815E-02 | 3.00321E-02 | 3.13894E-02 |
| 3.27109E-02  | 3.72510E-02 | 3.79844E-02 | 4.41294E-02 | 4.80993E-02 |
| 7.12060E-02  | 7.24566E-02 | 7.29137E-02 | 7.73630E-02 | 7.79599E-02 |
| 8.71620E-02  | 9.52773E-02 | 1.15259E-01 | 1.21583E-01 | 1.27472E-01 |
| 1.33198E-01  | 1.37133E-01 | 1.45100E-01 | 1.45303E-01 | 1.52229E-01 |
| 1.56516E-01  | 1.59979E-01 | 1.61878E-01 | 1.72414E-01 | 1.73955E-01 |
| 1.80855E-01  | 2.04857E-01 | 2.08572E-01 | 2.13930E-01 | 2.17342E-01 |
| 2.25082E-01  | 2.28259E-01 | 2.33199E-01 | 2.34478E-01 | 2.38673E-01 |
| 2.39778E-01  | 2.45721E-01 | 2.56615E-01 | 2.61083E-01 | 2.71596E-01 |
| 2.83850E-01  | 2.90715E-01 | 2.90805E-01 | 2.92642E-01 | 2.95997E-01 |
| 2.99359E-01  | 3.01632E-01 | 3.03480E-01 | 3.04220E-01 | 3.09861E-01 |
| 3.18892E-01  | 3.27308E-01 | 3.28988E-01 | 3.29382E-01 | 3.30352E-01 |
| 3.33234E-01  | 3.34412E-01 | 3.34841E-01 | 3.36230E-01 | 3.36819E-01 |
| 3.39099E-01  | 3.43853E-01 | 3.49434E-01 | 3.50836E-01 | 3.51003E-01 |
| 3.52695E-01  | 3.55023E-01 | 3.58703E-01 | 3.79455E-01 | 3.80724E-01 |
| 3.85382E-01  | 3.88914E-01 | 4.00754E-01 | 4.09155E-01 | 4.18006E-01 |
| 4.27093E-01  | 4.35040E-01 | 4.42023E-01 | 4.50378E-01 | 4.53940E-01 |
| 4.59273E-01  | 4.60092E-01 | 4.83221E-01 | 5.12605E-01 | 5.26775E-01 |
| 5.81318E-01  | 6.62785E-01 | 7.12908E-01 | 8.98293E-01 | 9.98019E-01 |

WARNING: Hessian has wrong number of negative eigenvalues

Level shifts adjusted to satisfy step-size constraints

Step size: 0.3001598  
Cos(theta): 0.8403107

Final level shift: -6.5067957E-02

gradient maximum: 2.2292E-02 . ( 4.5000E-04 )  
gradient rms: 7.9695E-03 . ( 3.0000E-04 )  
step size: 0.30011 trust radius: 0.30000  
displacement maximum: 1.1042E-01 . ( 1.8000E-03 )  
displacement rms: 2.6842E-02 . ( 1.2000E-03 )  
predicted energy change: -1.4167E-02 geom step: 3.0011E-01 full step:  
3.0011E-01  
molecular structure not yet converged...

center of mass moved by:  
x: -5.5950E-03 y: 7.6968E-03 z: -4.4494E-03

new geometry:

|      | angstroms     |               |               |
|------|---------------|---------------|---------------|
| atom | x             | y             | z             |
| H25  | 1.3000057341  | -4.0446715404 | -1.8727338343 |
| C1   | 1.7026939373  | -3.0552926996 | -1.9574406747 |
| C2   | 2.7925937972  | -0.4454117717 | -2.1864623609 |
| C3   | 1.2756367979  | -2.0396021592 | -1.1162682346 |
| C4   | 2.6510739254  | -2.7537778402 | -2.9028014140 |
| C5   | 3.1850745284  | -1.4624565025 | -3.0204944936 |
| C6   | 1.8389560512  | -0.7573766749 | -1.2459451927 |
| C7   | 0.2746601898  | -1.9802721238 | -0.0472431354 |
| H27  | 2.9921020618  | -3.5205509309 | -3.5709850587 |
| H28  | 3.9180556351  | -1.2653155134 | -3.7781348023 |
| H30  | 3.1967520295  | 0.5414840374  | -2.2539666965 |
| C8   | 0.2859364622  | -0.7201748586 | 0.4186213510  |
| H32  | -0.3509002982 | -2.7839149072 | 0.2684123225  |
| C10  | -0.4068794516 | 0.1748148641  | 1.4115178091  |
| N2   | 1.2283706441  | 0.0277582731  | -0.2839807543 |
| C9   | 1.3926480395  | 1.3238941298  | 0.1687100607  |
| O1   | 2.1502915712  | 2.1320278797  | -0.3146471116 |
| H43  | -0.4840730528 | -0.2976550039 | 2.3806825465  |
| C12  | -1.8056401415 | 0.5803435977  | 0.9522133665  |
| C11  | 0.5521666204  | 1.4174770968  | 1.4500145694  |
| C18  | 1.5154311962  | 1.3618881050  | 2.6517390944  |
| H48  | -0.0010786736 | 2.3434826850  | 1.4616137164  |
| C13  | -3.3245042383 | 1.3499713474  | -0.7328881690 |
| C14  | -4.1026214042 | 1.0418530975  | 1.4984843844  |
| C15  | -4.3506035749 | 1.4042975786  | 0.1931790739  |
| C16  | -2.8386979422 | 0.6314940493  | 1.8731142946  |
| C17  | -2.0623843801 | 0.9412705690  | -0.3591057341 |
| H51  | -5.3299578141 | 1.7238608156  | -0.1036299762 |
| H52  | -2.6610473470 | 0.3439091297  | 2.8921391173  |
| H55  | -3.5072558167 | 1.6255227631  | -1.7530350708 |
| H56  | -4.8897581808 | 1.0755516404  | 2.2257683902  |
| H59  | -1.2881829644 | 0.8900692830  | -1.0982983159 |
| H60  | 2.0921999335  | 0.4437520187  | 2.6374524446  |
| H61  | 0.9572822454  | 1.4126318968  | 3.5786387383  |
| H62  | 2.2052787472  | 2.1965661297  | 2.6181661050  |

nuclear repulsion energy..... 1456.501220668 hartrees

/ end of geometry optimization iteration 1 /

end of program geopt

```

start of program onee
smallest eigenvalue of S:    1.204E-03
number of canonical orbitals.....    210
end of program onee

```

```

start of program probe
end of program probe

```

```

start of program grid

```

```

number of gridpoints:
  atom      H25      C1      C2      C3      C4      C5      C6      C7
grid # 1      73      89      89      90      87      87      83      85
grid # 2     106      99      98      99      98      98      90      92
grid # 3     224     183     182     195     182     182     187     181
grid # 4     223     379     381     405     379     379     371     378

```

```

number of gridpoints:
  atom      H27      H28      H30      C8      H32      C10      N2      C9
grid # 1      73      73      73      85      73      81      98      77
grid # 2     106     106     105      91     106      91     107      81
grid # 3     224     224     220     189     223     175     222     167
grid # 4     224     224     219     373     229     350     401     331

```

```

number of gridpoints:
  atom      O1      H43      C12      C11      C18      H48      C13      C14
grid # 1     112      70      91      82      71      70      85      87
grid # 2     127      98     106      92      77     101      99      99
grid # 3     271     208     190     176     150     217     181     182
grid # 4     474     202     399     353     305     206     378     380

```

```

number of gridpoints:
  atom      C15      C16      C17      H51      H52      H55      H56      H59
grid # 1      89      85      86      73      73      73      73      71
grid # 2     100      98      98     106     104     106     106     101
grid # 3     182     181     179     224     215     224     224     216
grid # 4     379     377     378     224     215     224     224     211

```

```

number of gridpoints:
  atom      H60      H61      H62      total
grid # 1      71      71      72     2821
grid # 2      99      99      99     3488
grid # 3     217     217     220     7034
grid # 4     218     219     222    10834

```

```

end of program grid

```

```

start of program rwr
recomputing RwR matrix 8      grid: 4
recomputing RwR matrix 15     grid: 4
end of program rwr

```

```

start of program scf

```

```

  i   u   d   i   g
  t   p   i   c   r
                                     RMS      maximum

```



|      | e | d | i | u | i |                  | energy   | density | DIIS    |
|------|---|---|---|---|---|------------------|----------|---------|---------|
|      | r | t | s | t | d | total energy     | change   | change  | error   |
| etot | 1 | N | N | 2 | U | -815.11300452463 |          | 8.2E-04 | 2.4E-02 |
| etot | 2 | Y | Y | 6 | M | -815.13845554450 | 2.5E-02  | 3.0E-04 | 1.0E-02 |
| etot | 3 | N | Y | 2 | U | -815.14064468767 | 2.2E-03  | 1.3E-04 | 3.4E-03 |
| etot | 4 | Y | Y | 6 | M | -815.14102231127 | 3.8E-04  | 5.8E-05 | 1.5E-03 |
| etot | 5 | Y | Y | 6 | M | -815.14107516429 | 5.3E-05  | 1.8E-05 | 3.8E-04 |
| etot | 6 | Y | Y | 6 | M | -815.14108493230 | 9.8E-06  | 8.9E-06 | 1.2E-04 |
| etot | 7 | Y | Y | 6 | M | -815.14108642610 | 1.5E-06  | 2.6E-06 | 3.0E-05 |
| etot | 8 | N | N | 2 | U | -815.14107666406 | -9.8E-06 | 0.0E+00 | 0.0E+00 |

Energy components, in hartrees:

|     |                               |                   |       |
|-----|-------------------------------|-------------------|-------|
| (A) | Nuclear repulsion.....        | 1456.50122066823  |       |
| (E) | Total one-electron terms..... | -3998.50139176955 |       |
| (I) | Total two-electron terms..... | 1726.85909443726  |       |
| (L) | Electronic energy.....        | -2271.64229733229 | (E+I) |
| (N) | Total energy.....             | -815.14107666406  | (A+L) |

SCFE: SCF energy: HF -815.14107666406 hartrees iterations: 8

HOMO energy: -0.29670

LUMO energy: 0.11667

Orbital energies:

|           |           |           |           |           |           |
|-----------|-----------|-----------|-----------|-----------|-----------|
| -20.45440 | -15.55145 | -11.32294 | -11.23506 | -11.22252 | -11.21370 |
| -11.20786 | -11.19918 | -11.18706 | -11.18355 | -11.18293 | -11.18211 |
| -11.18043 | -11.18027 | -11.17843 | -11.17777 | -11.17714 | -11.17579 |
| -11.17475 | -11.17146 | -1.42428  | -1.33289  | -1.18223  | -1.16413  |
| -1.11718  | -1.08655  | -1.04178  | -1.02774  | -1.02055  | -1.00081  |
| -0.94644  | -0.90533  | -0.85641  | -0.84329  | -0.82973  | -0.81198  |
| -0.79403  | -0.76366  | -0.72150  | -0.68662  | -0.67955  | -0.66894  |
| -0.65944  | -0.64133  | -0.63812  | -0.62648  | -0.61384  | -0.60708  |
| -0.60310  | -0.59819  | -0.59138  | -0.57931  | -0.56391  | -0.55409  |
| -0.54280  | -0.53022  | -0.51760  | -0.51023  | -0.49799  | -0.49658  |
| -0.49102  | -0.48668  | -0.45894  | -0.42231  | -0.39422  | -0.34896  |
| -0.34152  | -0.31515  | -0.29670  | 0.11667   | 0.13464   | 0.14410   |
| 0.14610   | 0.20391   | 0.22899   | 0.26095   | 0.27143   | 0.27236   |
| 0.30261   |           |           |           |           |           |

end of program scf

start of program derla

end of program derla

start of program rwr

recomputing RwR matrix 8 grid: 4

recomputing RwR matrix 15 grid: 4

end of program rwr

start of program der1b

forces (hartrees/bohr) : total

| atom | label | x             | y             | z             |
|------|-------|---------------|---------------|---------------|
| 1    | H25   | -2.575654E-04 | -1.377957E-05 | -4.102216E-04 |

|       |     |               |               |               |
|-------|-----|---------------|---------------|---------------|
| 2     | C1  | -2.921206E-03 | 1.937730E-04  | 2.822312E-03  |
| 3     | C2  | 1.858833E-03  | 1.772500E-03  | -3.957725E-04 |
| 4     | C3  | -2.790645E-03 | 3.008666E-03  | 1.631593E-03  |
| 5     | C4  | 6.819097E-03  | 7.895586E-04  | -7.404351E-03 |
| 6     | C5  | 3.991034E-03  | -6.501846E-03 | -5.765574E-03 |
| 7     | C6  | -8.295094E-03 | -2.212359E-03 | 7.216076E-03  |
| 8     | C7  | 1.134323E-03  | 3.532668E-03  | 1.054047E-03  |
| 9     | H27 | 2.780910E-04  | 8.549838E-04  | 3.853479E-05  |
| 10    | H28 | -1.323298E-04 | -9.603221E-04 | 3.619389E-04  |
| 11    | H30 | -8.635922E-04 | 9.383658E-04  | 9.517932E-04  |
| 12    | C8  | -1.441258E-03 | -6.390285E-03 | -2.555182E-03 |
| 13    | H32 | 4.945037E-04  | 4.862599E-04  | 5.846434E-04  |
| 14    | C10 | -1.702306E-03 | 3.493569E-03  | -2.132366E-03 |
| 15    | N2  | -8.173328E-04 | 5.735054E-03  | 1.045233E-03  |
| 16    | C9  | 7.079861E-03  | -6.565176E-03 | 9.773937E-04  |
| 17    | O1  | -2.761746E-03 | 1.033521E-03  | 6.809743E-04  |
| 18    | H43 | 2.463391E-03  | 1.201338E-03  | 3.951064E-04  |
| 19    | C12 | 3.528471E-03  | -3.033739E-03 | 4.214148E-03  |
| 20    | C11 | -3.632064E-03 | 9.135875E-04  | -5.108017E-04 |
| 21    | C18 | 2.612744E-03  | 8.745695E-04  | 1.275877E-04  |
| 22    | H48 | -2.940717E-04 | -7.509783E-05 | -5.318336E-05 |
| 23    | C13 | -2.184273E-03 | 2.031700E-03  | -5.345485E-03 |
| 24    | C14 | -3.952667E-03 | 1.126668E-04  | 3.661182E-03  |
| 25    | C15 | -2.890876E-03 | 1.817066E-03  | -3.261519E-03 |
| 26    | C16 | 2.790241E-03  | -1.902126E-03 | 4.155119E-03  |
| 27    | C17 | 2.128329E-03  | -4.447950E-04 | -3.503469E-03 |
| 28    | H51 | 3.556837E-04  | -2.003766E-04 | -9.353409E-05 |
| 29    | H52 | 5.628224E-04  | 2.813238E-04  | -3.052406E-04 |
| 30    | H55 | -3.578681E-04 | -9.991860E-05 | 3.182582E-04  |
| 31    | H56 | 1.870887E-04  | -1.910249E-04 | 5.330263E-06  |
| 32    | H59 | 7.351639E-04  | -2.014384E-04 | 9.823533E-04  |
| 33    | H60 | -9.407576E-04 | -3.966907E-04 | 2.070924E-04  |
| 34    | H61 | -1.014150E-04 | -2.044374E-04 | 2.377736E-05  |
| 35    | H62 | -3.394196E-04 | -1.491331E-05 | -4.819000E-04 |
| ----- |     | -----         | -----         | -----         |
| total |     | 3.431898E-04  | -3.371549E-04 | -7.641063E-04 |

end of program derlb

start of program geopt 2

geometry optimization step 2  
reading input hessian of dimension 105  
in five columns format

Hessian eigenvalues:

|              |              |              |              |              |
|--------------|--------------|--------------|--------------|--------------|
| -1.26376E-03 | 0.000000E+00 | 0.000000E+00 | 0.000000E+00 | 0.000000E+00 |
| 0.000000E+00 | 0.000000E+00 | 0.000000E+00 | 0.000000E+00 | 0.000000E+00 |
| 0.000000E+00 | 0.000000E+00 | 0.000000E+00 | 0.000000E+00 | 0.000000E+00 |
| 0.000000E+00 | 0.000000E+00 | 0.000000E+00 | 0.000000E+00 | 0.000000E+00 |
| 0.000000E+00 | 0.000000E+00 | 0.000000E+00 | 0.000000E+00 | 0.000000E+00 |
| 0.000000E+00 | 0.000000E+00 | 1.38656E-02  | 1.79374E-02  | 2.24197E-02  |
| 2.60907E-02  | 2.81363E-02  | 2.95248E-02  | 2.99439E-02  | 3.06786E-02  |
| 3.26181E-02  | 3.71148E-02  | 3.85611E-02  | 4.35651E-02  | 4.79685E-02  |
| 6.76648E-02  | 6.97388E-02  | 7.15610E-02  | 7.45320E-02  | 7.53942E-02  |
| 8.25495E-02  | 9.73693E-02  | 1.12991E-01  | 1.17826E-01  | 1.20233E-01  |
| 1.31245E-01  | 1.33445E-01  | 1.37395E-01  | 1.41868E-01  | 1.49829E-01  |
| 1.53534E-01  | 1.57146E-01  | 1.59863E-01  | 1.69710E-01  | 1.71296E-01  |
| 1.77100E-01  | 2.00128E-01  | 2.04359E-01  | 2.10738E-01  | 2.13691E-01  |
| 2.18355E-01  | 2.24566E-01  | 2.29455E-01  | 2.31275E-01  | 2.33813E-01  |
| 2.35404E-01  | 2.41291E-01  | 2.45137E-01  | 2.54251E-01  | 2.59919E-01  |

|             |             |             |             |             |
|-------------|-------------|-------------|-------------|-------------|
| 2.78636E-01 | 2.81173E-01 | 2.87824E-01 | 2.89736E-01 | 2.96503E-01 |
| 2.99863E-01 | 3.01550E-01 | 3.02446E-01 | 3.03185E-01 | 3.08887E-01 |
| 3.10192E-01 | 3.20066E-01 | 3.26595E-01 | 3.26861E-01 | 3.29242E-01 |
| 3.32715E-01 | 3.33177E-01 | 3.34949E-01 | 3.36171E-01 | 3.39071E-01 |
| 3.41807E-01 | 3.44186E-01 | 3.46277E-01 | 3.48363E-01 | 3.52291E-01 |
| 3.58215E-01 | 3.66951E-01 | 3.74359E-01 | 3.76156E-01 | 3.82285E-01 |
| 3.87801E-01 | 4.03253E-01 | 4.07438E-01 | 4.17467E-01 | 4.28253E-01 |
| 4.35391E-01 | 4.37442E-01 | 4.43209E-01 | 4.51325E-01 | 4.57444E-01 |
| 4.68068E-01 | 4.75730E-01 | 4.88499E-01 | 5.09972E-01 | 5.23383E-01 |
| 5.81922E-01 | 6.54065E-01 | 6.99931E-01 | 9.27449E-01 | 1.01232E+00 |

WARNING: Hessian has wrong number of negative eigenvalues

```

energy change:      -1.0293E-02 . ( 5.0000E-05 )
gradient maximum:   9.0587E-03 . ( 4.5000E-04 )
gradient rms:       2.4046E-03 . ( 3.0000E-04 )
step size:    0.29345  trust radius:  0.30000
displacement maximum: 9.9604E-02 . ( 1.8000E-03 )
displacement rms:    2.6247E-02 . ( 1.2000E-03 )
predicted energy change: -1.6638E-03  geom step:  2.9345E-01  full step:
2.9345E-01
molecular structure not yet converged...
```

```

center of mass moved by:
  x:    6.1612E-03    y:   -6.4057E-03    z:   -4.0606E-03
```

new geometry:

|      | angstroms     |               |               |
|------|---------------|---------------|---------------|
| atom | x             | y             | z             |
| H25  | 1.1518606918  | -4.0098168429 | -1.9778502480 |
| C1   | 1.6213334988  | -3.0412378065 | -2.0198094544 |
| C2   | 2.8854945661  | -0.5061674774 | -2.1375642472 |
| C3   | 1.2106916162  | -2.0237954044 | -1.1655115623 |
| C4   | 2.6572180524  | -2.7892002183 | -2.9132967886 |
| C5   | 3.2840693794  | -1.5321531013 | -2.9725294884 |
| C6   | 1.8498186945  | -0.7716072417 | -1.2458480733 |
| C7   | 0.1942594179  | -1.9359342141 | -0.1091129346 |
| H27  | 2.9857473521  | -3.5649096486 | -3.5726003392 |
| H28  | 4.0801549607  | -1.3620817681 | -3.6763623200 |
| H30  | 3.3461240517  | 0.4646787114  | -2.1568798680 |
| C8   | 0.2618553297  | -0.6883215287 | 0.3821991922  |
| H32  | -0.4681638696 | -2.7172745500 | 0.1901386333  |
| C10  | -0.3975941615 | 0.2237999717  | 1.3918814693  |
| N2   | 1.2380037561  | 0.0371308184  | -0.3021743921 |
| C9   | 1.4521852626  | 1.3156189960  | 0.1616775535  |
| O1   | 2.2343198160  | 2.1086661210  | -0.3070199295 |
| H43  | -0.4258590119 | -0.2337511833 | 2.3689489433  |
| C12  | -1.8107959507 | 0.6020767984  | 0.9735434286  |
| C11  | 0.5660949612  | 1.4604984734  | 1.4059534484  |
| C18  | 1.5050815780  | 1.4495699586  | 2.6314972653  |
| H48  | 0.0195675120  | 2.3870243908  | 1.3648102645  |
| C13  | -3.3661198293 | 1.4033105312  | -0.6804601314 |
| C14  | -4.1304614559 | 0.9236093394  | 1.5325150118  |
| C15  | -4.3956846103 | 1.3521476600  | 0.2443536745  |
| C16  | -2.8435084195 | 0.5508352241  | 1.8928334718  |
| C17  | -2.0838903192 | 1.0297839732  | -0.3191628233 |
| H51  | -5.3894948227 | 1.6371262915  | -0.0361671987 |
| H52  | -2.6501748807 | 0.2107839874  | 2.8903083998  |
| H55  | -3.5615758548 | 1.7281930898  | -1.6791037066 |
| H56  | -4.9200189160 | 0.8719163607  | 2.2537100009  |
| H59  | -1.2975036389 | 1.0562731973  | -1.0405498146 |

|     |              |              |              |
|-----|--------------|--------------|--------------|
| H60 | 2.0234153991 | 0.4989957046 | 2.6957845223 |
| H61 | 0.9267575216 | 1.5940760071 | 3.5380412645 |
| H62 | 2.2363036985 | 2.2462236996 | 2.5514206148 |

nuclear repulsion energy..... 1451.691619179 hartrees

-----

/ end of geometry optimization iteration 2 /

-----

end of program geopt

start of program onee

smallest eigenvalue of S: 1.267E-03

number of canonical orbitals..... 210

end of program onee

start of program probe

end of program probe

start of program grid

number of gridpoints:

| atom     | H25 | C1  | C2  | C3  | C4  | C5  | C6  | C7  |
|----------|-----|-----|-----|-----|-----|-----|-----|-----|
| grid # 1 | 73  | 89  | 87  | 90  | 87  | 87  | 84  | 85  |
| grid # 2 | 106 | 100 | 98  | 100 | 99  | 99  | 90  | 92  |
| grid # 3 | 224 | 184 | 184 | 195 | 183 | 183 | 192 | 182 |
| grid # 4 | 224 | 382 | 383 | 405 | 377 | 381 | 378 | 378 |

number of gridpoints:

| atom     | H27 | H28 | H30 | C8  | H32 | C10 | N2  | C9  |
|----------|-----|-----|-----|-----|-----|-----|-----|-----|
| grid # 1 | 73  | 73  | 73  | 85  | 73  | 81  | 99  | 77  |
| grid # 2 | 106 | 106 | 105 | 91  | 106 | 92  | 109 | 81  |
| grid # 3 | 224 | 224 | 220 | 189 | 223 | 175 | 223 | 165 |
| grid # 4 | 224 | 224 | 219 | 373 | 229 | 349 | 402 | 325 |

number of gridpoints:

| atom     | O1  | H43 | C12 | C11 | C18 | H48 | C13 | C14 |
|----------|-----|-----|-----|-----|-----|-----|-----|-----|
| grid # 1 | 112 | 69  | 90  | 80  | 71  | 70  | 87  | 87  |
| grid # 2 | 123 | 98  | 105 | 91  | 75  | 101 | 100 | 100 |
| grid # 3 | 271 | 208 | 190 | 174 | 149 | 217 | 184 | 183 |
| grid # 4 | 474 | 202 | 401 | 349 | 305 | 209 | 376 | 379 |

number of gridpoints:

| atom     | C15 | C16 | C17 | H51 | H52 | H55 | H56 | H59 |
|----------|-----|-----|-----|-----|-----|-----|-----|-----|
| grid # 1 | 89  | 86  | 86  | 73  | 73  | 73  | 73  | 71  |
| grid # 2 | 100 | 100 | 96  | 106 | 104 | 106 | 106 | 101 |
| grid # 3 | 182 | 181 | 181 | 224 | 214 | 224 | 224 | 216 |
| grid # 4 | 380 | 376 | 374 | 224 | 214 | 224 | 224 | 211 |

number of gridpoints:

| atom     | H60 | H61 | H62 | total |
|----------|-----|-----|-----|-------|
| grid # 1 | 70  | 71  | 71  | 2818  |
| grid # 2 | 99  | 99  | 99  | 3489  |
| grid # 3 | 216 | 218 | 220 | 7046  |
| grid # 4 | 218 | 220 | 221 | 10834 |

end of program grid

```

start of program rwr
recomputing RwR matrix 15    grid: 4
end of program rwr

```

```

start of program scf

```

|      | i | u | d | i | g |                  | energy  | RMS     | maximum |
|------|---|---|---|---|---|------------------|---------|---------|---------|
|      | t | p | i | c | r |                  | change  | density | DIIS    |
|      | e | d | i | u | i |                  |         | change  | error   |
|      | r | t | s | t | d | total energy     |         |         |         |
| etot | 1 | N | N | 2 | U | -815.10856900978 |         | 7.3E-04 | 2.3E-02 |
| etot | 2 | Y | Y | 6 | M | -815.13699415616 | 2.8E-02 | 3.3E-04 | 9.5E-03 |
| etot | 3 | N | Y | 2 | U | -815.14103578522 | 4.0E-03 | 1.2E-04 | 2.9E-03 |
| etot | 4 | Y | Y | 6 | M | -815.14134795057 | 3.1E-04 | 3.2E-05 | 7.1E-04 |
| etot | 5 | Y | Y | 6 | M | -815.14137251641 | 2.5E-05 | 1.6E-05 | 2.0E-04 |
| etot | 6 | Y | Y | 6 | M | -815.14138057381 | 8.1E-06 | 5.0E-06 | 6.2E-05 |
| etot | 7 | Y | N | 6 | M | -815.14138192640 | 1.4E-06 | 0.0E+00 | 0.0E+00 |

Energy components, in hartrees:

```

(A) Nuclear repulsion..... 1451.69161917946
(E) Total one-electron terms..... -3988.89311720062
(I) Total two-electron terms..... 1722.06011609476
(L) Electronic energy..... -2266.83300110586 (E+I)
(N) Total energy..... -815.14138192640 (A+L)

```

```

SCFE: SCF energy: HF      -815.14138192640 hartrees    iterations: 7

```

```

HOMO energy:      -0.29734
LUMO energy:       0.11639

```

Orbital energies:

|           |           |           |           |           |           |
|-----------|-----------|-----------|-----------|-----------|-----------|
| -20.45321 | -15.55299 | -11.32204 | -11.23694 | -11.22491 | -11.21375 |
| -11.20682 | -11.19934 | -11.18918 | -11.18469 | -11.18424 | -11.18329 |
| -11.18180 | -11.18146 | -11.18132 | -11.17931 | -11.17887 | -11.17874 |
| -11.17783 | -11.17454 | -1.42407  | -1.33298  | -1.18018  | -1.16024  |
| -1.11545  | -1.08682  | -1.04120  | -1.02619  | -1.01647  | -0.99987  |
| -0.94624  | -0.90518  | -0.85586  | -0.84416  | -0.82958  | -0.80997  |
| -0.79405  | -0.76187  | -0.72165  | -0.68702  | -0.67958  | -0.66835  |
| -0.65921  | -0.64273  | -0.63751  | -0.62652  | -0.61049  | -0.60653  |
| -0.60301  | -0.59843  | -0.59123  | -0.57758  | -0.56225  | -0.55362  |
| -0.54320  | -0.53048  | -0.51753  | -0.50912  | -0.49826  | -0.49630  |
| -0.49000  | -0.48671  | -0.45834  | -0.42141  | -0.39308  | -0.34800  |
| -0.34190  | -0.31344  | -0.29734  | 0.11639   | 0.13296   | 0.14186   |
| 0.14452   | 0.20313   | 0.22808   | 0.26208   | 0.27120   | 0.27206   |
| 0.30290   |           |           |           |           |           |

```

end of program scf

```

```

start of program derla
end of program derla

```

```

start of program rwr
recomputing RwR matrix 15    grid: 4
end of program rwr

```

start of program derlb

forces (hartrees/bohr) : total

| atom  | label | x             | y             | z             |
|-------|-------|---------------|---------------|---------------|
| 1     | H25   | 2.098872E-03  | 3.380861E-03  | -1.168343E-03 |
| 2     | C1    | 5.496099E-03  | -6.956917E-04 | -2.974951E-03 |
| 3     | C2    | -3.983874E-03 | 1.177321E-03  | 4.738758E-03  |
| 4     | C3    | 3.388157E-03  | 3.089239E-03  | -1.574441E-03 |
| 5     | C4    | -4.182380E-03 | 4.182366E-03  | 4.655928E-03  |
| 6     | C5    | -4.144667E-03 | -3.482909E-03 | 2.243977E-03  |
| 7     | C6    | 1.359420E-03  | -1.580591E-03 | -7.157283E-03 |
| 8     | C7    | 2.484529E-03  | 2.864738E-03  | -2.743071E-04 |
| 9     | H27   | 1.798075E-04  | -1.251287E-03 | -7.909477E-04 |
| 10    | H28   | -2.625419E-03 | -1.542959E-03 | 2.332376E-03  |
| 11    | H30   | -2.633713E-03 | -3.094521E-03 | 5.034015E-04  |
| 12    | C8    | -3.169504E-03 | -5.212712E-04 | -2.036196E-03 |
| 13    | H32   | 8.089568E-04  | 1.220704E-03  | 7.917000E-05  |
| 14    | C10   | 7.296106E-04  | 6.268588E-04  | -1.962084E-03 |
| 15    | N2    | 5.964268E-03  | -2.540358E-03 | 1.592548E-03  |
| 16    | C9    | -2.374178E-03 | 1.824113E-04  | -1.409597E-03 |
| 17    | O1    | 9.993823E-04  | -8.270370E-04 | 9.655266E-04  |
| 18    | H43   | 1.993385E-04  | -1.075655E-03 | 8.894052E-04  |
| 19    | C12   | 2.012208E-04  | 1.192534E-04  | 1.749012E-04  |
| 20    | C11   | 2.185718E-03  | -9.823637E-04 | -7.319136E-04 |
| 21    | C18   | -2.016583E-03 | 5.400820E-04  | 1.711031E-03  |
| 22    | H48   | -6.955556E-04 | 1.601647E-03  | -5.279066E-04 |
| 23    | C13   | 2.965739E-03  | -8.569035E-04 | 1.179894E-03  |
| 24    | C14   | 3.168776E-04  | -3.917690E-04 | -4.258883E-04 |
| 25    | C15   | 4.633616E-04  | -7.064301E-04 | 2.447394E-03  |
| 26    | C16   | -2.482101E-03 | 4.777271E-05  | -2.748550E-04 |
| 27    | C17   | -2.722128E-03 | 3.488933E-04  | 1.071938E-03  |
| 28    | H51   | -1.516382E-04 | 1.280466E-04  | -1.255269E-04 |
| 29    | H52   | -1.087607E-04 | 7.888498E-05  | 1.344865E-03  |
| 30    | H55   | -2.157401E-04 | 7.831934E-04  | -2.685911E-03 |
| 31    | H56   | -6.246669E-04 | 8.224659E-05  | 8.782099E-04  |
| 32    | H59   | 1.864034E-03  | 2.618714E-04  | -2.910454E-03 |
| 33    | H60   | 5.295714E-04  | 7.486976E-04  | 2.328120E-04  |
| 34    | H61   | 1.255871E-03  | -1.451449E-04 | -3.410125E-04 |
| 35    | H62   | -8.772592E-04 | -1.152230E-03 | -1.981717E-04 |
| total |       | 4.826672E-04  | 6.179652E-04  | -5.276526E-04 |

end of program derlb

start of program geopt 3

geometry optimization step 3

reading input hessian of dimension 105

in five columns format

reading input hessian of dimension 105

in five columns format

Hessian eigenvalues:

|              |             |             |             |             |
|--------------|-------------|-------------|-------------|-------------|
| -1.25351E-03 | 0.00000E+00 | 0.00000E+00 | 0.00000E+00 | 0.00000E+00 |
| 0.00000E+00  | 0.00000E+00 | 0.00000E+00 | 0.00000E+00 | 0.00000E+00 |
| 0.00000E+00  | 0.00000E+00 | 0.00000E+00 | 0.00000E+00 | 0.00000E+00 |
| 0.00000E+00  | 0.00000E+00 | 0.00000E+00 | 0.00000E+00 | 0.00000E+00 |
| 0.00000E+00  | 0.00000E+00 | 0.00000E+00 | 0.00000E+00 | 0.00000E+00 |
| 0.00000E+00  | 0.00000E+00 | 1.37059E-02 | 1.66291E-02 | 2.21695E-02 |

|             |             |             |             |             |
|-------------|-------------|-------------|-------------|-------------|
| 2.77894E-02 | 2.83298E-02 | 3.00506E-02 | 3.08218E-02 | 3.09428E-02 |
| 3.39351E-02 | 3.73791E-02 | 4.36431E-02 | 4.52120E-02 | 5.02468E-02 |
| 6.51205E-02 | 6.63929E-02 | 7.16219E-02 | 7.39902E-02 | 7.44288E-02 |
| 8.00691E-02 | 8.70548E-02 | 1.12362E-01 | 1.13663E-01 | 1.15425E-01 |
| 1.21478E-01 | 1.28463E-01 | 1.33270E-01 | 1.39046E-01 | 1.42773E-01 |
| 1.53576E-01 | 1.54190E-01 | 1.60954E-01 | 1.64182E-01 | 1.67932E-01 |
| 1.72504E-01 | 1.88954E-01 | 1.98079E-01 | 1.98956E-01 | 2.05932E-01 |
| 2.11946E-01 | 2.18216E-01 | 2.23191E-01 | 2.24917E-01 | 2.30268E-01 |
| 2.32960E-01 | 2.35368E-01 | 2.42611E-01 | 2.51571E-01 | 2.53253E-01 |
| 2.62848E-01 | 2.70566E-01 | 2.79141E-01 | 2.86243E-01 | 2.89671E-01 |
| 2.97269E-01 | 2.98703E-01 | 3.00485E-01 | 3.07995E-01 | 3.12061E-01 |
| 3.17593E-01 | 3.26409E-01 | 3.29871E-01 | 3.32476E-01 | 3.33981E-01 |
| 3.34117E-01 | 3.36861E-01 | 3.38562E-01 | 3.41939E-01 | 3.45258E-01 |
| 3.47091E-01 | 3.49729E-01 | 3.53065E-01 | 3.56418E-01 | 3.57719E-01 |
| 3.64812E-01 | 3.76133E-01 | 3.77832E-01 | 3.81172E-01 | 3.89131E-01 |
| 3.98627E-01 | 4.15068E-01 | 4.18376E-01 | 4.30353E-01 | 4.39375E-01 |
| 4.41786E-01 | 4.43884E-01 | 4.59399E-01 | 4.67508E-01 | 4.78749E-01 |
| 4.82375E-01 | 4.96998E-01 | 5.06373E-01 | 5.41864E-01 | 5.99703E-01 |
| 6.20995E-01 | 6.77213E-01 | 7.24138E-01 | 9.41540E-01 | 1.05694E+00 |

WARNING: Hessian has wrong number of negative eigenvalues

Level shifts adjusted to satisfy step-size constraints

Step size: 0.3000211

Cos(theta): 0.3699691

Final level shift: -3.3930890E-03

energy change: -3.0526E-04 . ( 5.0000E-05 )

gradient maximum: 1.1892E-02 . ( 4.5000E-04 )

gradient rms: 2.1714E-03 . ( 3.0000E-04 )

step size: 0.30001 trust radius: 0.30000

displacement maximum: 1.7324E-01 . ( 1.8000E-03 )

displacement rms: 2.6834E-02 . ( 1.2000E-03 )

predicted energy change: -1.5000E-03 geom step: 3.0001E-01 full step:  
3.0001E-01

molecular structure not yet converged...

center of mass moved by:

x: 1.1701E-02 y: -8.4875E-03 z: 5.3236E-03

new geometry:

|      | angstroms     |               |               |
|------|---------------|---------------|---------------|
| atom | x             | y             | z             |
| H25  | 1.1614190570  | -4.0152533188 | -1.9128485587 |
| C1   | 1.6086208687  | -3.0522794650 | -1.9818314055 |
| C2   | 2.7984426018  | -0.5348705802 | -2.1771022069 |
| C3   | 1.2043923931  | -2.0257717304 | -1.1339854821 |
| C4   | 2.5939478766  | -2.8242005058 | -2.9131348386 |
| C5   | 3.1802412861  | -1.5761633223 | -3.0100641781 |
| C6   | 1.8162588474  | -0.7819033370 | -1.2494263537 |
| C7   | 0.2187483558  | -1.9169086228 | -0.0521484347 |
| H27  | 2.9072186891  | -3.6085404749 | -3.5673537360 |
| H28  | 3.9311282709  | -1.4195666234 | -3.7399785897 |
| H30  | 3.2224166237  | 0.4345780682  | -2.2252236816 |
| C8   | 0.2669567905  | -0.6672699906 | 0.3993876946  |
| H32  | -0.4201025246 | -2.6898731188 | 0.2844525025  |
| C10  | -0.3819054453 | 0.2698931957  | 1.3980122901  |
| N2   | 1.2569609330  | 0.0390282117  | -0.2892173015 |
| C9   | 1.5093626556  | 1.3052147892  | 0.1764075879  |
| O1   | 2.3133717921  | 2.0816116198  | -0.2820004538 |



|     |               |               |               |
|-----|---------------|---------------|---------------|
| H43 | -0.3916406892 | -0.1634111567 | 2.3860214399  |
| C12 | -1.7964244935 | 0.6228627455  | 0.9746968558  |
| C11 | 0.5901251536  | 1.4982564148  | 1.3929861846  |
| C18 | 1.4993549390  | 1.5232151999  | 2.6444438604  |
| H48 | 0.0507622990  | 2.4265078689  | 1.3049029716  |
| C13 | -3.3105468126 | 1.5463894150  | -0.6593153947 |
| C14 | -4.1637618973 | 0.7431335580  | 1.4469962012  |
| C15 | -4.3847212370 | 1.3203164828  | 0.2039478302  |
| C16 | -2.8716913116 | 0.3986341852  | 1.8298430292  |
| C17 | -2.0276768548 | 1.1945164398  | -0.2769447225 |
| H51 | -5.3792592923 | 1.5836177829  | -0.0906898094 |
| H52 | -2.7085231988 | -0.0541893670 | 2.7881336586  |
| H55 | -3.4743324151 | 1.9857927272  | -1.6185445974 |
| H56 | -4.9889142419 | 0.5537702489  | 2.1127342653  |
| H59 | -1.1993483024 | 1.3535275563  | -0.9396952544 |
| H60 | 1.9945919384  | 0.5664206563  | 2.7608144602  |
| H61 | 0.9045486745  | 1.7140557085  | 3.5308675162  |
| H62 | 2.2427731320  | 2.3021460902  | 2.5438716690  |

nuclear repulsion energy..... 1453.210759158 hartrees

-----  
 / end of geometry optimization iteration 3 /  
 -----

end of program geopt

start of program onee  
 smallest eigenvalue of S: 1.167E-03  
 number of canonical orbitals..... 210  
 end of program onee

start of program probe  
 end of program probe

start of program grid

number of gridpoints:

| atom     | H25 | C1  | C2  | C3  | C4  | C5  | C6  | C7  |
|----------|-----|-----|-----|-----|-----|-----|-----|-----|
| grid # 1 | 73  | 89  | 87  | 85  | 87  | 86  | 84  | 86  |
| grid # 2 | 106 | 99  | 97  | 98  | 98  | 97  | 91  | 93  |
| grid # 3 | 224 | 183 | 182 | 197 | 182 | 183 | 185 | 182 |
| grid # 4 | 224 | 376 | 378 | 406 | 375 | 374 | 367 | 376 |

number of gridpoints:

| atom     | H27 | H28 | H30 | C8  | H32 | C10 | N2  | C9  |
|----------|-----|-----|-----|-----|-----|-----|-----|-----|
| grid # 1 | 73  | 73  | 73  | 85  | 73  | 82  | 100 | 75  |
| grid # 2 | 106 | 106 | 105 | 91  | 106 | 92  | 108 | 80  |
| grid # 3 | 224 | 224 | 220 | 185 | 223 | 172 | 222 | 164 |
| grid # 4 | 224 | 222 | 216 | 376 | 227 | 350 | 401 | 332 |

number of gridpoints:

| atom     | O1  | H43 | C12 | C11 | C18 | H48 | C13 | C14 |
|----------|-----|-----|-----|-----|-----|-----|-----|-----|
| grid # 1 | 111 | 69  | 90  | 81  | 71  | 69  | 89  | 88  |
| grid # 2 | 123 | 99  | 106 | 91  | 75  | 101 | 99  | 100 |
| grid # 3 | 272 | 208 | 195 | 175 | 148 | 217 | 183 | 184 |
| grid # 4 | 473 | 202 | 400 | 353 | 305 | 208 | 377 | 380 |

number of gridpoints:

| atom | C15 | C16 | C17 | H51 | H52 | H55 | H56 | H59 |
|------|-----|-----|-----|-----|-----|-----|-----|-----|
|------|-----|-----|-----|-----|-----|-----|-----|-----|

|          |     |     |     |     |     |     |     |     |
|----------|-----|-----|-----|-----|-----|-----|-----|-----|
| grid # 1 | 89  | 87  | 86  | 73  | 73  | 73  | 73  | 70  |
| grid # 2 | 100 | 100 | 97  | 106 | 103 | 106 | 106 | 102 |
| grid # 3 | 184 | 182 | 180 | 224 | 215 | 224 | 224 | 216 |
| grid # 4 | 378 | 377 | 377 | 224 | 214 | 224 | 224 | 210 |

number of gridpoints:

|          |     |     |     |       |
|----------|-----|-----|-----|-------|
| atom     | H60 | H61 | H62 | total |
| grid # 1 | 70  | 71  | 71  | 2815  |
| grid # 2 | 99  | 99  | 99  | 3484  |
| grid # 3 | 215 | 218 | 220 | 7036  |
| grid # 4 | 217 | 220 | 221 | 10808 |

end of program grid

start of program rwr

recomputing RwR matrix 15 grid: 4

end of program rwr

start of program scf

|      | i | u | d | i | g |                  |               | RMS     | maximum |
|------|---|---|---|---|---|------------------|---------------|---------|---------|
|      | t | p | i | c | r |                  |               | energy  | DIIS    |
|      | e | d | i | u | i |                  |               | density | error   |
|      | r | t | s | t | d | total energy     | energy change | change  |         |
| etot | 1 | N | N | 2 | U | -815.08897379247 |               | 9.1E-04 | 3.7E-02 |
| etot | 2 | Y | Y | 6 | M | -815.13304471310 | 4.4E-02       | 4.1E-04 | 1.5E-02 |
| etot | 3 | N | Y | 2 | U | -815.13889498757 | 5.9E-03       | 1.5E-04 | 4.9E-03 |
| etot | 4 | Y | Y | 6 | M | -815.13944528947 | 5.5E-04       | 3.9E-05 | 1.2E-03 |
| etot | 5 | Y | Y | 6 | M | -815.13949633447 | 5.1E-05       | 2.0E-05 | 3.2E-04 |
| etot | 6 | N | Y | 2 | U | -815.13952013096 | 2.4E-05       | 5.3E-06 | 6.3E-05 |
| etot | 7 | Y | Y | 6 | M | -815.13952466940 | 4.5E-06       | 2.2E-06 | 2.4E-05 |
| etot | 8 | Y | N | 6 | M | -815.13952532202 | 6.5E-07       | 0.0E+00 | 0.0E+00 |

Energy components, in hartrees:

|     |                               |                   |       |
|-----|-------------------------------|-------------------|-------|
| (A) | Nuclear repulsion.....        | 1453.21075915848  |       |
| (E) | Total one-electron terms..... | -3991.88769772517 |       |
| (I) | Total two-electron terms..... | 1723.53741324468  |       |
| (L) | Electronic energy.....        | -2268.35028448050 | (E+I) |
| (N) | Total energy.....             | -815.13952532202  | (A+L) |

SCFE: SCF energy: HF -815.13952532202 hartrees iterations: 8

HOMO energy: -0.29699

LUMO energy: 0.11697

Orbital energies:

|           |           |           |           |           |           |
|-----------|-----------|-----------|-----------|-----------|-----------|
| -20.45183 | -15.55125 | -11.32116 | -11.23526 | -11.22007 | -11.21339 |
| -11.20644 | -11.20145 | -11.18720 | -11.18662 | -11.18656 | -11.18592 |
| -11.18430 | -11.18410 | -11.17796 | -11.17701 | -11.17561 | -11.17435 |
| -11.17280 | -11.16972 | -1.42361  | -1.33462  | -1.17965  | -1.16296  |
| -1.11681  | -1.08978  | -1.03943  | -1.02605  | -1.02232  | -0.99931  |
| -0.94810  | -0.90555  | -0.85859  | -0.84189  | -0.83058  | -0.81460  |
| -0.79459  | -0.76410  | -0.72058  | -0.68822  | -0.68142  | -0.67000  |
| -0.65944  | -0.64364  | -0.63883  | -0.62952  | -0.61294  | -0.60633  |
| -0.60343  | -0.60022  | -0.59242  | -0.57452  | -0.56289  | -0.55300  |
| -0.54417  | -0.53162  | -0.51796  | -0.50808  | -0.49960  | -0.49698  |
| -0.49014  | -0.48760  | -0.46005  | -0.42007  | -0.39285  | -0.34847  |

```

-0.34051  -0.31842  -0.29699   0.11697   0.13273   0.14110
 0.14535   0.20646   0.22923   0.26364   0.27133   0.27373
 0.29976

```

end of program scf

```

start of program derla
end of program derla

```

```

start of program rwr
recomputing RwR matrix 15      grid: 4
end of program rwr

```

start of program derlb

forces (hartrees/bohr) : total

| atom  | label | x             | y             | z             |
|-------|-------|---------------|---------------|---------------|
| 1     | H25   | -3.806402E-03 | -5.536656E-03 | 1.423983E-03  |
| 2     | C1    | -7.595509E-03 | -2.805998E-03 | 6.852796E-03  |
| 3     | C2    | 3.269989E-03  | -4.374206E-03 | -5.495096E-03 |
| 4     | C3    | -1.302549E-03 | -6.804802E-03 | 3.353788E-04  |
| 5     | C4    | -3.482803E-03 | -1.274686E-03 | 2.553103E-03  |
| 6     | C5    | -7.617634E-04 | 1.344370E-02  | 5.614457E-03  |
| 7     | C6    | 6.044798E-03  | 2.062297E-03  | -1.730929E-03 |
| 8     | C7    | -2.609308E-03 | -8.869214E-03 | -5.177161E-03 |
| 9     | H27   | 2.187307E-04  | -2.077622E-03 | -1.030189E-03 |
| 10    | H28   | 7.669363E-03  | 3.818581E-03  | -6.174422E-03 |
| 11    | H30   | 6.067677E-03  | 6.892154E-03  | -2.173920E-03 |
| 12    | C8    | 4.710461E-03  | 1.145895E-02  | 7.546522E-03  |
| 13    | H32   | -4.569118E-03 | -4.635587E-03 | 1.271004E-03  |
| 14    | C10   | 3.032770E-03  | -2.481664E-03 | 9.472803E-04  |
| 15    | N2    | -1.307554E-03 | -2.043169E-04 | -2.272438E-03 |
| 16    | C9    | -8.582600E-03 | 4.373520E-03  | -2.774170E-03 |
| 17    | O1    | 3.396909E-03  | -1.139413E-03 | -3.619326E-05 |
| 18    | H43   | -1.821274E-03 | -2.496712E-03 | 8.146571E-04  |
| 19    | C12   | -5.927197E-03 | 2.304126E-03  | 3.638865E-04  |
| 20    | C11   | 4.598454E-03  | -2.795029E-03 | 1.859308E-04  |
| 21    | C18   | -5.101998E-03 | -9.268442E-05 | 2.163241E-04  |
| 22    | H48   | 1.203985E-04  | 1.499553E-03  | -8.116444E-04 |
| 23    | C13   | -1.379697E-03 | -4.009225E-03 | 8.690672E-03  |
| 24    | C14   | 1.813768E-03  | 8.633659E-04  | -4.308969E-03 |
| 25    | C15   | 6.202003E-03  | -1.624962E-03 | 1.343779E-03  |
| 26    | C16   | 1.850168E-03  | 1.397592E-03  | -5.846259E-03 |
| 27    | C17   | -3.224399E-03 | -8.897936E-04 | 5.478460E-03  |
| 28    | H51   | -6.269819E-04 | 7.851819E-04  | -1.123054E-03 |
| 29    | H52   | 7.635297E-04  | 4.240073E-04  | 4.500045E-04  |
| 30    | H55   | -1.245965E-03 | 1.191251E-03  | -2.529247E-03 |
| 31    | H56   | 3.007047E-03  | 1.231123E-03  | -2.432805E-03 |
| 32    | H59   | -1.662959E-03 | 1.369248E-04  | -9.669580E-04 |
| 33    | H60   | 1.476641E-03  | 4.277060E-04  | -3.849825E-06 |
| 34    | H61   | 8.023828E-04  | 3.074340E-04  | -2.156559E-04 |
| 35    | H62   | 7.657863E-04  | -3.469971E-05 | 1.554486E-04  |
| total |       | 8.028000E-04  | 4.701943E-04  | -8.592716E-04 |

end of program derlb

```

start of program geopt      4

geometry optimization step  4
reading input hessian of dimension    105
  in five columns format
reading input hessian of dimension    105
  in five columns format
** restarting optimization from step      3 **

```

Hessian eigenvalues:

|              |              |              |              |              |
|--------------|--------------|--------------|--------------|--------------|
| -1.31575E-03 | 0.000000E+00 | 0.000000E+00 | 0.000000E+00 | 0.000000E+00 |
| 0.000000E+00 | 0.000000E+00 | 0.000000E+00 | 0.000000E+00 | 0.000000E+00 |
| 0.000000E+00 | 0.000000E+00 | 0.000000E+00 | 0.000000E+00 | 0.000000E+00 |
| 0.000000E+00 | 0.000000E+00 | 0.000000E+00 | 0.000000E+00 | 0.000000E+00 |
| 0.000000E+00 | 0.000000E+00 | 0.000000E+00 | 0.000000E+00 | 0.000000E+00 |
| 0.000000E+00 | 0.000000E+00 | 1.25399E-02  | 1.59841E-02  | 2.15622E-02  |
| 2.69414E-02  | 2.81926E-02  | 2.94072E-02  | 3.02705E-02  | 3.13298E-02  |
| 3.31282E-02  | 3.56779E-02  | 3.82925E-02  | 4.63961E-02  | 5.85155E-02  |
| 6.28471E-02  | 6.81911E-02  | 6.92904E-02  | 7.30826E-02  | 7.66931E-02  |
| 8.16257E-02  | 8.52811E-02  | 1.05202E-01  | 1.07786E-01  | 1.14336E-01  |
| 1.21140E-01  | 1.25371E-01  | 1.31747E-01  | 1.34925E-01  | 1.42338E-01  |
| 1.45462E-01  | 1.51031E-01  | 1.59358E-01  | 1.61852E-01  | 1.63352E-01  |
| 1.81227E-01  | 1.83381E-01  | 1.91528E-01  | 1.97941E-01  | 2.00319E-01  |
| 2.08863E-01  | 2.17701E-01  | 2.21787E-01  | 2.24603E-01  | 2.26075E-01  |
| 2.28541E-01  | 2.34873E-01  | 2.39879E-01  | 2.43922E-01  | 2.46885E-01  |
| 2.53047E-01  | 2.62363E-01  | 2.65660E-01  | 2.77464E-01  | 2.80394E-01  |
| 2.89462E-01  | 2.91191E-01  | 3.01568E-01  | 3.05497E-01  | 3.08922E-01  |
| 3.18556E-01  | 3.24224E-01  | 3.25649E-01  | 3.34348E-01  | 3.35552E-01  |
| 3.41032E-01  | 3.42347E-01  | 3.42809E-01  | 3.47773E-01  | 3.48073E-01  |
| 3.49132E-01  | 3.53173E-01  | 3.57944E-01  | 3.63668E-01  | 3.64657E-01  |
| 3.71424E-01  | 3.71912E-01  | 3.83748E-01  | 3.90436E-01  | 3.91986E-01  |
| 4.08519E-01  | 4.18330E-01  | 4.29417E-01  | 4.32770E-01  | 4.43347E-01  |
| 4.43695E-01  | 4.56224E-01  | 4.61820E-01  | 4.80189E-01  | 4.92057E-01  |
| 4.97869E-01  | 5.08854E-01  | 5.73496E-01  | 5.99870E-01  | 6.25465E-01  |
| 6.75695E-01  | 7.33012E-01  | 8.86780E-01  | 9.21955E-01  | 1.03946E+00  |

WARNING: Hessian has wrong number of negative eigenvalues

Level shifts adjusted to satisfy step-size constraints

Step size: 0.3003077  
Cos(theta): 0.2681660

Final level shift: -4.0869655E-03

energy change: 1.8566E-03 . ( 5.0000E-05 )  
 gradient maximum: 1.1892E-02 . ( 4.5000E-04 )  
 gradient rms: 2.1714E-03 . ( 3.0000E-04 )  
 step size: 0.30028 trust radius: 0.30000  
 displacement maximum: 9.9534E-02 . ( 1.8000E-03 )  
 displacement rms: 2.6858E-02 . ( 1.2000E-03 )  
 predicted energy change: -1.1617E-03 geom step: 3.0028E-01 full step:  
 3.0028E-01  
 molecular structure not yet converged...

center of mass moved by:

x: 8.3267E-16 y: 1.5005E-16 z: 5.5511E-16

new geometry:

angstroms  
 atom x y z

|     |               |               |               |
|-----|---------------|---------------|---------------|
| H25 | 1.2043005006  | -4.0177275246 | -1.9824602028 |
| C1  | 1.6461683306  | -3.0412613553 | -2.0263296897 |
| C2  | 2.8157294014  | -0.4844828084 | -2.1756613164 |
| C3  | 1.2391572476  | -2.0321210806 | -1.1548460996 |
| C4  | 2.6207549813  | -2.7668515878 | -2.9626563370 |
| C5  | 3.1965160839  | -1.5041533843 | -3.0361944423 |
| C6  | 1.8414130481  | -0.7752501759 | -1.2474890014 |
| C7  | 0.2555901030  | -1.9603197428 | -0.0841142447 |
| H27 | 2.9367812303  | -3.5378106365 | -3.6430836510 |
| H28 | 3.9502502530  | -1.3184381309 | -3.7705770606 |
| H30 | 3.2403721099  | 0.4973471024  | -2.2106264468 |
| C8  | 0.2901559215  | -0.7071386810 | 0.3940886584  |
| H32 | -0.3894912994 | -2.7485350389 | 0.2361511970  |
| C10 | -0.3811065047 | 0.1950873568  | 1.3905290944  |
| N2  | 1.2848088368  | 0.0095097503  | -0.2632877246 |
| C9  | 1.5115807017  | 1.2737451115  | 0.2235131931  |
| O1  | 2.3393875286  | 2.0533846317  | -0.2056237943 |
| H43 | -0.4006450301 | -0.2786758531 | 2.3664442759  |
| C12 | -1.7941142920 | 0.5654501017  | 0.9725603429  |
| C11 | 0.5666942627  | 1.4394494551  | 1.4219023295  |
| C18 | 1.4220368495  | 1.4748383266  | 2.7057167408  |
| H48 | 0.0116770276  | 2.3691264107  | 1.3155501008  |
| C13 | -3.3557685473 | 1.3421305392  | -0.6951159099 |
| C14 | -4.0760400048 | 0.9942226112  | 1.4953952766  |
| C15 | -4.3532183072 | 1.3696462381  | 0.2140381847  |
| C16 | -2.7987439255 | 0.5970491151  | 1.8737207117  |
| C17 | -2.0865926408 | 0.9394764816  | -0.3186370519 |
| H51 | -5.3362859848 | 1.6829292210  | -0.0793750969 |
| H52 | -2.5862011020 | 0.3249022895  | 2.8679202982  |
| H55 | -3.5670310417 | 1.6335748207  | -1.6900741223 |
| H56 | -4.8405281490 | 1.0189687292  | 2.1972271293  |
| H59 | -1.3179262930 | 0.9147403706  | -1.0302545291 |
| H60 | 1.9819450175  | 0.5533315242  | 2.8232761175  |
| H61 | 0.7971142817  | 1.6057123093  | 3.5820267895  |
| H62 | 2.1207731973  | 2.2942329172  | 2.6539595437  |

nuclear repulsion energy..... 1456.799458232 hartrees

-----  
 / end of geometry optimization iteration 4 /  
 -----

end of program geopt

start of program onee  
 smallest eigenvalue of S: 1.190E-03  
 number of canonical orbitals..... 210  
 end of program onee

start of program probe  
 end of program probe

start of program grid

number of gridpoints:

| atom     | H25 | C1  | C2  | C3  | C4  | C5  | C6  | C7  |
|----------|-----|-----|-----|-----|-----|-----|-----|-----|
| grid # 1 | 73  | 89  | 87  | 89  | 87  | 85  | 83  | 85  |
| grid # 2 | 106 | 99  | 99  | 98  | 99  | 99  | 88  | 92  |
| grid # 3 | 224 | 183 | 183 | 196 | 183 | 183 | 190 | 183 |
| grid # 4 | 224 | 380 | 383 | 407 | 380 | 374 | 372 | 377 |

number of gridpoints:

| atom     | H27 | H28 | H30 | C8  | H32 | C10 | N2  | C9  |
|----------|-----|-----|-----|-----|-----|-----|-----|-----|
| grid # 1 | 73  | 73  | 73  | 85  | 73  | 81  | 99  | 76  |
| grid # 2 | 106 | 106 | 105 | 91  | 106 | 91  | 108 | 81  |
| grid # 3 | 224 | 224 | 220 | 188 | 223 | 175 | 220 | 164 |
| grid # 4 | 224 | 224 | 219 | 372 | 228 | 351 | 399 | 331 |

number of gridpoints:

| atom     | O1  | H43 | C12 | C11 | C18 | H48 | C13 | C14 |
|----------|-----|-----|-----|-----|-----|-----|-----|-----|
| grid # 1 | 111 | 70  | 87  | 82  | 72  | 70  | 85  | 85  |
| grid # 2 | 127 | 97  | 99  | 92  | 75  | 100 | 96  | 95  |
| grid # 3 | 272 | 207 | 192 | 175 | 142 | 217 | 180 | 177 |
| grid # 4 | 473 | 200 | 395 | 351 | 308 | 208 | 375 | 373 |

number of gridpoints:

| atom     | C15 | C16 | C17 | H51 | H52 | H55 | H56 | H59 |
|----------|-----|-----|-----|-----|-----|-----|-----|-----|
| grid # 1 | 87  | 85  | 84  | 73  | 73  | 73  | 73  | 71  |
| grid # 2 | 97  | 95  | 93  | 106 | 104 | 106 | 106 | 100 |
| grid # 3 | 181 | 178 | 177 | 224 | 215 | 223 | 224 | 216 |
| grid # 4 | 377 | 371 | 372 | 224 | 214 | 222 | 222 | 212 |

number of gridpoints:

| atom     | H60 | H61 | H62 | total |
|----------|-----|-----|-----|-------|
| grid # 1 | 71  | 71  | 71  | 2805  |
| grid # 2 | 99  | 99  | 99  | 3459  |
| grid # 3 | 217 | 218 | 220 | 7018  |
| grid # 4 | 217 | 219 | 221 | 10799 |

end of program grid

start of program rwr

```
recomputing RwR matrix 14    grid: 4
recomputing RwR matrix 15    grid: 4
end of program rwr
```

start of program scf

|      | i | u | d | i | g |                  |         | RMS     | maximum |
|------|---|---|---|---|---|------------------|---------|---------|---------|
|      | t | p | i | c | r |                  |         | energy  | density |
|      | e | d | i | u | i |                  |         | change  | DIIS    |
|      | r | t | s | t | d | total energy     | energy  | change  | error   |
| etot | 1 | N | N | 2 | U | -815.04407421317 |         | 1.2E-03 | 4.3E-02 |
| etot | 2 | Y | Y | 6 | M | -815.12312641991 | 7.9E-02 | 5.6E-04 | 1.6E-02 |
| etot | 3 | N | Y | 2 | U | -815.13340222471 | 1.0E-02 | 2.0E-04 | 5.1E-03 |
| etot | 4 | Y | Y | 6 | M | -815.13433913117 | 9.4E-04 | 5.4E-05 | 1.2E-03 |
| etot | 5 | Y | Y | 6 | M | -815.13445674667 | 1.2E-04 | 2.7E-05 | 3.6E-04 |
| etot | 6 | N | Y | 2 | U | -815.13449646689 | 4.0E-05 | 8.9E-06 | 1.5E-04 |
| etot | 7 | Y | Y | 6 | M | -815.13449765058 | 1.2E-06 | 2.5E-06 | 2.3E-05 |
| etot | 8 | Y | N | 6 | M | -815.13449768154 | 3.1E-08 | 0.0E+00 | 0.0E+00 |

Energy components, in hartrees:

```
(A) Nuclear repulsion..... 1456.79945823214
(E) Total one-electron terms..... -3998.96497185383
(I) Total two-electron terms..... 1727.03101594015
(L) Electronic energy..... -2271.93395591368 (E+I)
(N) Total energy..... -815.13449768154 (A+L)
```

SCFE: SCF energy: HF -815.13449768154 hartrees iterations: 8

HOMO energy: -0.29545

LUMO energy: 0.11597

Orbital energies:

|           |           |           |           |           |           |
|-----------|-----------|-----------|-----------|-----------|-----------|
| -20.45267 | -15.55305 | -11.32297 | -11.23537 | -11.22122 | -11.21329 |
| -11.20891 | -11.19297 | -11.18712 | -11.17918 | -11.17820 | -11.17782 |
| -11.17730 | -11.17704 | -11.17667 | -11.17658 | -11.17558 | -11.17481 |
| -11.17461 | -11.17194 | -1.42054  | -1.33686  | -1.18932  | -1.16645  |
| -1.11951  | -1.09032  | -1.04955  | -1.02674  | -1.02137  | -1.00162  |
| -0.94991  | -0.90787  | -0.85782  | -0.85510  | -0.82975  | -0.81275  |
| -0.79688  | -0.76315  | -0.72917  | -0.68720  | -0.68069  | -0.67304  |
| -0.65972  | -0.64560  | -0.64187  | -0.62768  | -0.61291  | -0.60886  |
| -0.60417  | -0.59780  | -0.59270  | -0.58074  | -0.56261  | -0.55668  |
| -0.54407  | -0.53172  | -0.51797  | -0.51161  | -0.49986  | -0.49822  |
| -0.49190  | -0.48868  | -0.45878  | -0.42261  | -0.39364  | -0.35194  |
| -0.34317  | -0.31761  | -0.29545  | 0.11597   | 0.13523   | 0.14319   |
| 0.14993   | 0.20515   | 0.22854   | 0.26421   | 0.27158   | 0.27366   |
| 0.30332   |           |           |           |           |           |

end of program scf

start of program derla

end of program derla

start of program rwr

recomputing RWR matrix 14 grid: 4

recomputing RWR matrix 15 grid: 4

end of program rwr

start of program derlb

forces (hartrees/bohr) : total

| atom | label | x             | y             | z             |
|------|-------|---------------|---------------|---------------|
| 1    | H25   | -5.446600E-04 | 7.880534E-04  | 1.297253E-03  |
| 2    | C1    | -5.435400E-03 | -1.049776E-03 | 2.999012E-03  |
| 3    | C2    | 4.478573E-03  | -2.835526E-03 | -6.031144E-03 |
| 4    | C3    | 3.212665E-03  | -7.577126E-03 | -5.571894E-03 |
| 5    | C4    | -1.826432E-03 | -4.195605E-03 | 7.457676E-04  |
| 6    | C5    | 2.102396E-03  | 1.035963E-02  | 2.255916E-03  |
| 7    | C6    | 9.634430E-03  | -4.229946E-04 | -2.295816E-03 |
| 8    | C7    | -9.737597E-03 | 5.699590E-05  | 4.582115E-03  |
| 9    | H27   | -6.248824E-04 | 2.543975E-03  | 1.906953E-03  |
| 10   | H28   | 1.605915E-03  | 1.513637E-03  | -1.527714E-03 |
| 11   | H30   | 1.225194E-03  | -1.083930E-03 | -7.954251E-05 |
| 12   | C8    | 3.371075E-03  | -5.926179E-03 | 2.093759E-03  |
| 13   | H32   | 3.287684E-04  | 1.124982E-03  | -1.461798E-03 |
| 14   | C10   | -1.169200E-03 | -2.882014E-03 | 4.949229E-03  |
| 15   | N2    | -5.817599E-03 | 5.154640E-03  | -3.396375E-03 |
| 16   | C9    | 6.715913E-03  | 8.767624E-03  | -5.829239E-03 |
| 17   | O1    | -7.752344E-03 | -7.262822E-03 | 4.632863E-03  |
| 18   | H43   | -1.695549E-03 | 2.055091E-03  | -1.453159E-03 |
| 19   | C12   | 1.774907E-02  | 2.108244E-04  | -1.368592E-02 |
| 20   | C11   | -3.571170E-04 | 4.062189E-03  | 1.119940E-03  |
| 21   | C18   | -2.722761E-04 | -5.816456E-05 | 8.495130E-04  |

|       |       |               |               |               |
|-------|-------|---------------|---------------|---------------|
| 22    | H48   | 2.842508E-03  | -5.378488E-03 | 8.125043E-04  |
| 23    | C13   | 2.695179E-02  | -3.128174E-03 | -1.536489E-02 |
| 24    | C14   | 1.303056E-02  | -4.343415E-03 | 8.254450E-03  |
| 25    | C15   | -2.218065E-02 | 3.224380E-03  | 8.018107E-03  |
| 26    | C16   | -2.539191E-02 | 3.994415E-03  | 1.021359E-02  |
| 27    | C17   | -5.081644E-03 | 4.352504E-03  | -1.069758E-02 |
| 28    | H51   | -3.566703E-04 | -7.982258E-04 | 3.141351E-03  |
| 29    | H52   | -3.004852E-03 | -4.070973E-03 | 1.737877E-02  |
| 30    | H55   | 3.587132E-03  | 1.806803E-03  | -1.207281E-02 |
| 31    | H56   | -1.913011E-02 | -8.545229E-04 | 2.213306E-02  |
| 32    | H59   | 1.303493E-02  | -4.972567E-05 | -1.594403E-02 |
| 33    | H60   | -4.745138E-04 | -2.246115E-04 | -1.371216E-03 |
| 34    | H61   | -8.771957E-04 | 5.493146E-04  | -1.386751E-03 |
| 35    | H62   | 2.483237E-03  | 2.514453E-03  | 1.692826E-04  |
| ----- |       |               |               |               |
|       | total | 6.235645E-04  | 9.372408E-04  | -6.164639E-04 |

end of program derlb

start of program geopt 5

geometry optimization step 5  
 [ turning on trust-radius adjustment ]  
 reading input hessian of dimension 105  
 in five columns format  
 reading input hessian of dimension 105  
 in five columns format  
 reading input hessian of dimension 105  
 in five columns format  
 \*\* restarting optimization from step 3 \*\*

Hessian eigenvalues:

|              |             |             |             |             |
|--------------|-------------|-------------|-------------|-------------|
| -1.32449E-03 | 0.00000E+00 | 0.00000E+00 | 0.00000E+00 | 0.00000E+00 |
| 0.00000E+00  | 0.00000E+00 | 0.00000E+00 | 0.00000E+00 | 0.00000E+00 |
| 0.00000E+00  | 0.00000E+00 | 0.00000E+00 | 0.00000E+00 | 0.00000E+00 |
| 0.00000E+00  | 0.00000E+00 | 0.00000E+00 | 0.00000E+00 | 0.00000E+00 |
| 0.00000E+00  | 0.00000E+00 | 0.00000E+00 | 0.00000E+00 | 0.00000E+00 |
| 0.00000E+00  | 0.00000E+00 | 1.25045E-02 | 1.73061E-02 | 2.16834E-02 |
| 2.72948E-02  | 2.76707E-02 | 2.96060E-02 | 3.01889E-02 | 3.06678E-02 |
| 3.36791E-02  | 3.64777E-02 | 4.38813E-02 | 4.64837E-02 | 5.68619E-02 |
| 6.65191E-02  | 7.04141E-02 | 7.11481E-02 | 7.37975E-02 | 7.50855E-02 |
| 8.17991E-02  | 9.72929E-02 | 1.11692E-01 | 1.15875E-01 | 1.19094E-01 |
| 1.28909E-01  | 1.34189E-01 | 1.35981E-01 | 1.38896E-01 | 1.44744E-01 |
| 1.53977E-01  | 1.58229E-01 | 1.60966E-01 | 1.64169E-01 | 1.70004E-01 |
| 1.82336E-01  | 1.92159E-01 | 1.95751E-01 | 1.99271E-01 | 2.07429E-01 |
| 2.12606E-01  | 2.15941E-01 | 2.20481E-01 | 2.21728E-01 | 2.29545E-01 |
| 2.31196E-01  | 2.38891E-01 | 2.47233E-01 | 2.49505E-01 | 2.54425E-01 |
| 2.65228E-01  | 2.75089E-01 | 2.81418E-01 | 2.83117E-01 | 2.89231E-01 |
| 2.96249E-01  | 2.97967E-01 | 3.05576E-01 | 3.09674E-01 | 3.13737E-01 |
| 3.16549E-01  | 3.20642E-01 | 3.29019E-01 | 3.30652E-01 | 3.33851E-01 |
| 3.34377E-01  | 3.35924E-01 | 3.36984E-01 | 3.38274E-01 | 3.40689E-01 |
| 3.45686E-01  | 3.49765E-01 | 3.51771E-01 | 3.57347E-01 | 3.62244E-01 |
| 3.65372E-01  | 3.70015E-01 | 3.76615E-01 | 3.86323E-01 | 3.97235E-01 |
| 4.00359E-01  | 4.13350E-01 | 4.20937E-01 | 4.25994E-01 | 4.31167E-01 |
| 4.36495E-01  | 4.48196E-01 | 4.57905E-01 | 4.67971E-01 | 4.77903E-01 |
| 4.93926E-01  | 5.17783E-01 | 5.36830E-01 | 5.62052E-01 | 6.01832E-01 |
| 6.21762E-01  | 6.78905E-01 | 7.07511E-01 | 9.55830E-01 | 1.05330E+00 |

WARNING: Hessian has wrong number of negative eigenvalues



Level shifts adjusted to satisfy step-size constraints

Step size: 0.1500346

Cos(theta): 0.4789360

Final level shift: -1.0201793E-02

energy change: 6.8842E-03 . ( 5.0000E-05 )

gradient maximum: 1.1892E-02 . ( 4.5000E-04 )

gradient rms: 2.1714E-03 . ( 3.0000E-04 )

step size: 0.15003 trust radius: 0.15000

displacement maximum: 5.7121E-02 . ( 1.8000E-03 )

displacement rms: 1.3419E-02 . ( 1.2000E-03 )

predicted energy change: -9.8703E-04 geom step: 1.5003E-01 full step:  
1.5003E-01

molecular structure not yet converged...

center of mass moved by:

x: -1.1102E-16 y: 1.4311E-16 z: -4.4409E-16

new geometry:

|      | angstroms     |               |               |
|------|---------------|---------------|---------------|
| atom | x             | y             | z             |
| H25  | 1.1319148883  | -3.9952023943 | -2.0201534455 |
| C1   | 1.6079073375  | -3.0322747334 | -2.0460887098 |
| C2   | 2.8767942829  | -0.5008728346 | -2.1380186353 |
| C3   | 1.2154586647  | -2.0198748680 | -1.1806074836 |
| C4   | 2.6239721541  | -2.7736024371 | -2.9427220071 |
| C5   | 3.2535561867  | -1.5219392622 | -2.9868950915 |
| C6   | 1.8585563093  | -0.7735507468 | -1.2494420811 |
| C7   | 0.2049904068  | -1.9321922082 | -0.1208563513 |
| H27  | 2.9388530842  | -3.5439899735 | -3.6185506418 |
| H28  | 4.0422896680  | -1.3540954933 | -3.6917786088 |
| H30  | 3.3374145292  | 0.4663934420  | -2.1457755513 |
| C8   | 0.2749769944  | -0.6907197285 | 0.3773695844  |
| H32  | -0.4658126767 | -2.7076886336 | 0.1732915850  |
| C10  | -0.3858147706 | 0.2182821505  | 1.3888253953  |
| N2   | 1.2708329236  | 0.0293390265  | -0.2887105241 |
| C9   | 1.4984390506  | 1.2975833189  | 0.1913462254  |
| O1   | 2.3211273174  | 2.0783670041  | -0.2403101446 |
| H43  | -0.4101933121 | -0.2512601125 | 2.3625103070  |
| C12  | -1.8006500292 | 0.5897401563  | 0.9735563977  |
| C11  | 0.5724399823  | 1.4566684287  | 1.4095955328  |
| C18  | 1.4637981101  | 1.4747267378  | 2.6753465127  |
| H48  | 0.0210232667  | 2.3844395070  | 1.3273763949  |
| C13  | -3.3599914883 | 1.3436124963  | -0.7031044180 |
| C14  | -4.1094011645 | 0.9537823114  | 1.5413821162  |
| C15  | -4.3798588447 | 1.3368575422  | 0.2369986575  |
| C16  | -2.8236048606 | 0.5831930164  | 1.9069252016  |
| C17  | -2.0811501906 | 0.9710896558  | -0.3374331337 |
| H51  | -5.3716412401 | 1.6235152351  | -0.0471983799 |
| H52  | -2.6214655456 | 0.2916479169  | 2.9236197431  |
| H55  | -3.5635633466 | 1.6319577298  | -1.7180613134 |
| H56  | -4.8910870142 | 0.9444022877  | 2.2757250750  |
| H59  | -1.2995748955 | 0.9598940697  | -1.0730616392 |
| H60  | 1.9996171174  | 0.5359392808  | 2.7735200907  |
| H61  | 0.8574946359  | 1.6233019043  | 3.5623098190  |
| H62  | 2.1818653741  | 2.2786190415  | 2.6066830579  |

nuclear repulsion energy..... 1452.008131448 hartrees

/ end of geometry optimization iteration 5 /

end of program geopt

start of program onee  
smallest eigenvalue of S: 1.220E-03  
number of canonical orbitals..... 210  
end of program onee

start of program probe  
end of program probe

start of program grid

number of gridpoints:

| atom     | H25 | C1  | C2  | C3  | C4  | C5  | C6  | C7  |
|----------|-----|-----|-----|-----|-----|-----|-----|-----|
| grid # 1 | 73  | 89  | 87  | 90  | 87  | 87  | 85  | 85  |
| grid # 2 | 106 | 100 | 98  | 98  | 98  | 99  | 90  | 92  |
| grid # 3 | 224 | 183 | 183 | 194 | 182 | 182 | 187 | 182 |
| grid # 4 | 224 | 380 | 383 | 404 | 379 | 379 | 372 | 378 |

number of gridpoints:

| atom     | H27 | H28 | H30 | C8  | H32 | C10 | N2  | C9  |
|----------|-----|-----|-----|-----|-----|-----|-----|-----|
| grid # 1 | 73  | 73  | 73  | 85  | 73  | 81  | 100 | 77  |
| grid # 2 | 106 | 106 | 105 | 91  | 106 | 92  | 108 | 80  |
| grid # 3 | 224 | 224 | 220 | 189 | 223 | 175 | 223 | 167 |
| grid # 4 | 224 | 224 | 218 | 376 | 229 | 350 | 402 | 331 |

number of gridpoints:

| atom     | O1  | H43 | C12 | C11 | C18 | H48 | C13 | C14 |
|----------|-----|-----|-----|-----|-----|-----|-----|-----|
| grid # 1 | 111 | 69  | 90  | 81  | 71  | 70  | 89  | 87  |
| grid # 2 | 127 | 98  | 105 | 91  | 75  | 100 | 100 | 99  |
| grid # 3 | 271 | 208 | 191 | 174 | 141 | 217 | 183 | 183 |
| grid # 4 | 474 | 201 | 404 | 352 | 308 | 208 | 380 | 380 |

number of gridpoints:

| atom     | C15 | C16 | C17 | H51 | H52 | H55 | H56 | H59 |
|----------|-----|-----|-----|-----|-----|-----|-----|-----|
| grid # 1 | 89  | 87  | 86  | 73  | 73  | 73  | 73  | 71  |
| grid # 2 | 100 | 100 | 97  | 106 | 104 | 106 | 106 | 100 |
| grid # 3 | 183 | 181 | 181 | 224 | 215 | 224 | 224 | 216 |
| grid # 4 | 380 | 378 | 376 | 224 | 214 | 224 | 224 | 212 |

number of gridpoints:

| atom     | H60 | H61 | H62 | total |
|----------|-----|-----|-----|-------|
| grid # 1 | 71  | 71  | 71  | 2824  |
| grid # 2 | 99  | 99  | 99  | 3486  |
| grid # 3 | 216 | 218 | 220 | 7032  |
| grid # 4 | 217 | 220 | 221 | 10850 |

end of program grid

start of program rwr  
recomputing RwR matrix 15 grid: 4  
end of program rwr

start of program scf

i u d i g

|      | t | p | i | c | r |                  | energy   | RMS     | maximum |
|------|---|---|---|---|---|------------------|----------|---------|---------|
|      | e | d | i | u | i |                  | change   | density | DIIS    |
|      | r | t | s | t | d | total energy     |          | change  | error   |
| etot | 1 | N | N | 2 | U | -815.13249458025 |          | 5.4E-04 | 1.3E-02 |
| etot | 2 | Y | Y | 6 | M | -815.14037000515 | 7.9E-03  | 1.6E-04 | 5.4E-03 |
| etot | 3 | N | Y | 2 | U | -815.14179494739 | 1.4E-03  | 6.4E-05 | 1.9E-03 |
| etot | 4 | Y | Y | 6 | M | -815.14193779473 | 1.4E-04  | 2.7E-05 | 7.7E-04 |
| etot | 5 | Y | Y | 6 | M | -815.14193886741 | 1.1E-06  | 1.0E-05 | 2.3E-04 |
| etot | 6 | Y | Y | 6 | M | -815.14194207983 | 3.2E-06  | 4.7E-06 | 6.5E-05 |
| etot | 7 | Y | N | 6 | M | -815.14194132284 | -7.6E-07 | 0.0E+00 | 0.0E+00 |

Energy components, in hartrees:

|     |                               |                   |       |
|-----|-------------------------------|-------------------|-------|
| (A) | Nuclear repulsion.....        | 1452.00813144791  |       |
| (E) | Total one-electron terms..... | -3989.53425604140 |       |
| (I) | Total two-electron terms..... | 1722.38418327065  |       |
| (L) | Electronic energy.....        | -2267.15007277075 | (E+I) |
| (N) | Total energy.....             | -815.14194132284  | (A+L) |

SCFE: SCF energy: HF -815.14194132284 hartrees iterations: 7

HOMO energy: -0.29727

LUMO energy: 0.11654

Orbital energies:

|           |           |           |           |           |           |
|-----------|-----------|-----------|-----------|-----------|-----------|
| -20.45247 | -15.55277 | -11.32255 | -11.23604 | -11.22291 | -11.21325 |
| -11.20784 | -11.20010 | -11.18842 | -11.18572 | -11.18522 | -11.18427 |
| -11.18258 | -11.18244 | -11.17966 | -11.17827 | -11.17805 | -11.17711 |
| -11.17619 | -11.17304 | -1.42035  | -1.33268  | -1.18004  | -1.16230  |
| -1.11570  | -1.08827  | -1.04029  | -1.02650  | -1.01978  | -0.99961  |
| -0.94625  | -0.90563  | -0.85601  | -0.84304  | -0.82941  | -0.81235  |
| -0.79374  | -0.76273  | -0.72048  | -0.68641  | -0.67937  | -0.66874  |
| -0.65881  | -0.64143  | -0.63752  | -0.62643  | -0.61237  | -0.60559  |
| -0.60404  | -0.59846  | -0.59123  | -0.57782  | -0.56109  | -0.55337  |
| -0.54153  | -0.53030  | -0.51715  | -0.50859  | -0.49804  | -0.49706  |
| -0.49052  | -0.48653  | -0.45833  | -0.42146  | -0.39424  | -0.34883  |
| -0.34076  | -0.31562  | -0.29727  | 0.11654   | 0.13318   | 0.14260   |
| 0.14376   | 0.20396   | 0.22821   | 0.26206   | 0.27075   | 0.27176   |
| 0.30311   |           |           |           |           |           |

end of program scf

start of program derla

end of program derla

start of program rwr

recomputing RwR matrix 15 grid: 4

end of program rwr

start of program derlb

forces (hartrees/bohr) : total

| atom | label | x             | y             | z            |
|------|-------|---------------|---------------|--------------|
| 1    | H25   | 7.747019E-04  | 1.904519E-03  | 2.594765E-04 |
| 2    | C1    | -1.208524E-03 | -8.124640E-04 | 8.118747E-04 |

|       |     |               |               |               |
|-------|-----|---------------|---------------|---------------|
| 3     | C2  | 1.354522E-03  | -3.515997E-04 | -1.207683E-03 |
| 4     | C3  | -5.754820E-04 | 1.298334E-03  | 1.713634E-03  |
| 5     | C4  | 2.288511E-03  | 2.179123E-03  | -1.252558E-03 |
| 6     | C5  | -1.744485E-04 | -1.804911E-03 | -6.397508E-04 |
| 7     | C6  | -1.227053E-03 | -5.478507E-04 | 1.747031E-04  |
| 8     | C7  | -6.840593E-04 | 4.288574E-04  | -4.824150E-04 |
| 9     | H27 | 4.289887E-04  | 6.674360E-04  | -6.510642E-05 |
| 10    | H28 | 1.380576E-04  | -3.597287E-04 | -5.461356E-04 |
| 11    | H30 | -3.763603E-04 | -1.376703E-03 | -1.991947E-04 |
| 12    | C8  | -2.047190E-05 | 2.600972E-03  | 3.093738E-04  |
| 13    | H32 | 5.516610E-04  | 6.393803E-04  | -2.433821E-04 |
| 14    | C10 | 3.965256E-04  | -2.348018E-03 | -1.487111E-03 |
| 15    | N2  | -2.167766E-04 | -2.238442E-03 | 9.730863E-04  |
| 16    | C9  | 3.844545E-03  | 4.398095E-03  | -1.067445E-03 |
| 17    | O1  | -5.680797E-03 | -5.926880E-03 | 2.913074E-03  |
| 18    | H43 | -2.309548E-06 | 4.456487E-04  | 1.810999E-04  |
| 19    | C12 | -1.030944E-04 | 9.254577E-04  | -2.595683E-03 |
| 20    | C11 | 1.877877E-03  | 1.845650E-03  | 1.187967E-03  |
| 21    | C18 | -2.172053E-03 | -3.357024E-04 | -1.213236E-03 |
| 22    | H48 | 1.317023E-03  | -1.923954E-03 | 3.201899E-04  |
| 23    | C13 | 4.242615E-05  | -2.335291E-04 | 1.994640E-05  |
| 24    | C14 | -8.646975E-04 | 1.247493E-03  | -1.858395E-03 |
| 25    | C15 | 4.461087E-04  | -9.802746E-04 | 3.081836E-03  |
| 26    | C16 | -2.991888E-04 | 3.397447E-04  | 7.103576E-04  |
| 27    | C17 | 1.798212E-03  | -1.036384E-03 | 1.436318E-03  |
| 28    | H51 | -7.577919E-04 | 5.017058E-05  | 2.884158E-04  |
| 29    | H52 | -6.447834E-04 | 4.260149E-04  | -2.830483E-03 |
| 30    | H55 | 4.425220E-04  | -4.616190E-04 | 2.115918E-03  |
| 31    | H56 | -1.373898E-04 | 3.560104E-05  | -8.699426E-04 |
| 32    | H59 | -7.445995E-04 | 5.800883E-05  | 9.968819E-04  |
| 33    | H60 | -4.061800E-04 | 7.724796E-04  | -3.832955E-04 |
| 34    | H61 | 3.921711E-05  | -1.043718E-04 | -1.052892E-03 |
| 35    | H62 | 1.411908E-03  | 1.184403E-03  | -1.346527E-04 |
| ----- |     | -----         | -----         | -----         |
| total |     | 8.567458E-04  | 6.049555E-04  | -6.352097E-04 |

end of program derlb

start of program geopt 6

geometry optimization step 6  
 reading input hessian of dimension 105  
 in five columns format  
 reading input hessian of dimension 105  
 in five columns format  
 reading input hessian of dimension 105  
 in five columns format

Hessian eigenvalues:

|              |             |             |             |             |
|--------------|-------------|-------------|-------------|-------------|
| -1.75629E-03 | 0.00000E+00 | 0.00000E+00 | 0.00000E+00 | 0.00000E+00 |
| 0.00000E+00  | 0.00000E+00 | 0.00000E+00 | 0.00000E+00 | 0.00000E+00 |
| 0.00000E+00  | 0.00000E+00 | 0.00000E+00 | 0.00000E+00 | 0.00000E+00 |
| 0.00000E+00  | 0.00000E+00 | 0.00000E+00 | 0.00000E+00 | 0.00000E+00 |
| 0.00000E+00  | 0.00000E+00 | 0.00000E+00 | 0.00000E+00 | 0.00000E+00 |
| 0.00000E+00  | 0.00000E+00 | 1.25210E-02 | 1.69275E-02 | 2.22577E-02 |
| 2.76729E-02  | 2.83528E-02 | 2.98744E-02 | 3.05711E-02 | 3.11340E-02 |
| 3.35441E-02  | 3.75558E-02 | 4.42658E-02 | 4.56072E-02 | 5.72854E-02 |
| 6.53778E-02  | 7.05571E-02 | 7.19937E-02 | 7.33143E-02 | 7.56005E-02 |
| 8.05529E-02  | 9.78298E-02 | 1.11669E-01 | 1.13692E-01 | 1.18946E-01 |
| 1.26842E-01  | 1.31223E-01 | 1.37120E-01 | 1.43005E-01 | 1.43950E-01 |
| 1.54000E-01  | 1.57856E-01 | 1.62747E-01 | 1.64286E-01 | 1.76643E-01 |

|             |             |             |             |             |
|-------------|-------------|-------------|-------------|-------------|
| 1.83652E-01 | 1.92910E-01 | 1.95417E-01 | 2.00500E-01 | 2.08382E-01 |
| 2.08947E-01 | 2.17425E-01 | 2.21502E-01 | 2.25092E-01 | 2.29146E-01 |
| 2.34610E-01 | 2.38731E-01 | 2.43569E-01 | 2.47642E-01 | 2.54524E-01 |
| 2.66049E-01 | 2.73272E-01 | 2.81773E-01 | 2.83327E-01 | 2.89158E-01 |
| 2.97259E-01 | 2.99377E-01 | 3.04732E-01 | 3.10406E-01 | 3.17168E-01 |
| 3.20911E-01 | 3.22358E-01 | 3.29467E-01 | 3.30684E-01 | 3.33661E-01 |
| 3.34442E-01 | 3.35906E-01 | 3.38650E-01 | 3.40429E-01 | 3.45705E-01 |
| 3.47062E-01 | 3.52498E-01 | 3.59094E-01 | 3.59497E-01 | 3.65692E-01 |
| 3.67622E-01 | 3.75160E-01 | 3.81210E-01 | 3.89566E-01 | 4.01901E-01 |
| 4.12641E-01 | 4.20371E-01 | 4.22796E-01 | 4.30466E-01 | 4.38909E-01 |
| 4.42857E-01 | 4.59071E-01 | 4.60990E-01 | 4.77834E-01 | 4.86711E-01 |
| 5.00035E-01 | 5.36259E-01 | 5.40626E-01 | 5.83078E-01 | 6.03741E-01 |
| 6.17135E-01 | 6.74308E-01 | 7.17611E-01 | 9.83182E-01 | 1.07888E+00 |

WARNING: Hessian has wrong number of negative eigenvalues

Level shifts adjusted to satisfy step-size constraints

Step size: 0.0750400

Cos(theta): 0.6554389

Final level shift: -2.9129815E-02

energy change: -5.5940E-04 . ( 5.0000E-05 )

gradient maximum: 8.7402E-03 . ( 4.5000E-04 )

gradient rms: 1.4782E-03 . ( 3.0000E-04 )

step size: 0.07504 trust radius: 0.07500

displacement maximum: 2.6578E-02 . ( 1.8000E-03 )

displacement rms: 6.7118E-03 . ( 1.2000E-03 )

predicted energy change: -4.8845E-04 geom step: 7.5040E-02 full step:  
7.5040E-02

molecular structure not yet converged...

center of mass moved by:

x: -4.0348E-03 y: -1.8733E-03 z: -3.5063E-03

new geometry:

|      | angstroms     |               |               |
|------|---------------|---------------|---------------|
| atom | x             | y             | z             |
| H25  | 1.1560329223  | -3.9972038998 | -2.0044562312 |
| C1   | 1.6272786794  | -3.0369148798 | -2.0364735734 |
| C2   | 2.8958510944  | -0.5173544999 | -2.1388127943 |
| C3   | 1.2158803634  | -2.0217859397 | -1.1845242374 |
| C4   | 2.6622322427  | -2.7865641372 | -2.9235101750 |
| C5   | 3.2899885671  | -1.5407776708 | -2.9751501301 |
| C6   | 1.8609166934  | -0.7795119672 | -1.2569835230 |
| C7   | 0.1905468410  | -1.9282325128 | -0.1386831431 |
| H27  | 2.9923294849  | -3.5608649346 | -3.5857702898 |
| H28  | 4.0898167324  | -1.3796167796 | -3.6724541898 |
| H30  | 3.3566831296  | 0.4471980857  | -2.1490926784 |
| C8   | 0.2655736872  | -0.6884272487 | 0.3632969120  |
| H32  | -0.4825753148 | -2.7014887488 | 0.1527406400  |
| C10  | -0.3903931990 | 0.2177451769  | 1.3768801718  |
| N2   | 1.2654786297  | 0.0245953099  | -0.3003898058 |
| C9   | 1.4923485416  | 1.2929298421  | 0.1776985656  |
| O1   | 2.3068647038  | 2.0681855882  | -0.2615666360 |
| H43  | -0.4118518307 | -0.2479845041 | 2.3523491537  |
| C12  | -1.8074994974 | 0.5954454466  | 0.9713218842  |
| C11  | 0.5732111375  | 1.4560970852  | 1.3958454979  |
| C18  | 1.4663958511  | 1.4828942571  | 2.6535863635  |
| H48  | 0.0244131452  | 2.3808417223  | 1.3146866819  |
| C13  | -3.3712112003 | 1.3910387723  | -0.6650920049 |

|     |               |              |               |
|-----|---------------|--------------|---------------|
| C14 | -4.1241345771 | 0.9347014188 | 1.5573642450  |
| C15 | -4.3948203852 | 1.3534191201 | 0.2727318205  |
| C16 | -2.8345998460 | 0.5593610209 | 1.9032497415  |
| C17 | -2.0882223209 | 1.0127543995 | -0.3197327670 |
| H51 | -5.3889952411 | 1.6440309849 | -0.0015676919 |
| H52 | -2.6333451649 | 0.2322706236 | 2.9043495310  |
| H55 | -3.5756674855 | 1.7114247886 | -1.6657628759 |
| H56 | -4.9072762347 | 0.8958720068 | 2.2885914013  |
| H59 | -1.3090154970 | 1.0298008285 | -1.0538280362 |
| H60 | 2.0000025899  | 0.5447709259 | 2.7538154741  |
| H61 | 0.8618012429  | 1.6365620858 | 3.5391552487  |
| H62 | 2.1902032380  | 2.2855731881 | 2.5787426072  |

nuclear repulsion energy..... 1451.863060005 hartrees

-----  
 / end of geometry optimization iteration 6 /  
 -----

end of program geopt

start of program onee  
 smallest eigenvalue of S: 1.220E-03  
 number of canonical orbitals..... 210  
 end of program onee

start of program probe  
 end of program probe

start of program grid

number of gridpoints:

| atom     | H25 | C1  | C2  | C3  | C4  | C5  | C6  | C7  |
|----------|-----|-----|-----|-----|-----|-----|-----|-----|
| grid # 1 | 73  | 89  | 87  | 90  | 87  | 87  | 84  | 85  |
| grid # 2 | 106 | 100 | 97  | 98  | 98  | 98  | 90  | 92  |
| grid # 3 | 224 | 183 | 183 | 194 | 182 | 182 | 187 | 183 |
| grid # 4 | 224 | 378 | 380 | 406 | 379 | 379 | 372 | 377 |

number of gridpoints:

| atom     | H27 | H28 | H30 | C8  | H32 | C10 | N2  | C9  |
|----------|-----|-----|-----|-----|-----|-----|-----|-----|
| grid # 1 | 73  | 73  | 73  | 85  | 73  | 81  | 100 | 76  |
| grid # 2 | 106 | 106 | 105 | 91  | 106 | 91  | 108 | 81  |
| grid # 3 | 224 | 224 | 220 | 189 | 223 | 176 | 223 | 165 |
| grid # 4 | 224 | 224 | 219 | 375 | 229 | 352 | 402 | 326 |

number of gridpoints:

| atom     | O1  | H43 | C12 | C11 | C18 | H48 | C13 | C14 |
|----------|-----|-----|-----|-----|-----|-----|-----|-----|
| grid # 1 | 111 | 69  | 91  | 82  | 71  | 70  | 85  | 87  |
| grid # 2 | 123 | 98  | 106 | 91  | 78  | 101 | 100 | 99  |
| grid # 3 | 271 | 208 | 191 | 175 | 150 | 217 | 183 | 183 |
| grid # 4 | 474 | 203 | 398 | 352 | 305 | 209 | 379 | 379 |

number of gridpoints:

| atom     | C15 | C16 | C17 | H51 | H52 | H55 | H56 | H59 |
|----------|-----|-----|-----|-----|-----|-----|-----|-----|
| grid # 1 | 88  | 86  | 86  | 73  | 73  | 73  | 73  | 71  |
| grid # 2 | 99  | 99  | 98  | 106 | 104 | 106 | 106 | 101 |
| grid # 3 | 183 | 182 | 181 | 224 | 214 | 224 | 224 | 216 |
| grid # 4 | 379 | 377 | 376 | 224 | 214 | 224 | 224 | 213 |

number of gridpoints:

|          |     |     |     |       |
|----------|-----|-----|-----|-------|
| atom     | H60 | H61 | H62 | total |
| grid # 1 | 71  | 71  | 71  | 2818  |
| grid # 2 | 99  | 99  | 99  | 3485  |
| grid # 3 | 216 | 218 | 220 | 7042  |
| grid # 4 | 217 | 220 | 221 | 10834 |

end of program grid

```

start of program rwr
recomputing RwR matrix   8      grid:  4
recomputing RwR matrix  14      grid:  4
recomputing RwR matrix  15      grid:  4
end of program rwr

```

start of program scf

|      | i | u | d | i | g |                  |          | RMS     | maximum |
|------|---|---|---|---|---|------------------|----------|---------|---------|
|      | t | p | i | c | r |                  |          | density | DIIS    |
|      | e | d | i | u | i |                  | energy   | change  | error   |
|      | r | t | s | t | d | total energy     | change   |         |         |
| etot | 1 | N | N | 1 | U | -815.13894652292 |          | 2.4E-04 | 7.4E-03 |
| etot | 2 | Y | Y | 4 | M | -815.14148871686 | 2.5E-03  | 1.0E-04 | 3.1E-03 |
| etot | 3 | Y | Y | 4 | M | -815.14180626252 | 3.2E-04  | 3.5E-05 | 1.0E-03 |
| etot | 4 | N | Y | 1 | U | -815.14183282696 | 2.7E-05  | 1.3E-05 | 3.1E-04 |
| etot | 5 | Y | Y | 4 | M | -815.14183897215 | 6.1E-06  | 5.9E-06 | 8.9E-05 |
| etot | 6 | Y | Y | 4 | M | -815.14183714495 | -1.8E-06 | 2.0E-06 | 2.9E-05 |
| etot | 7 | Y | N | 4 | M | -815.14183878410 | 1.6E-06  | 0.0E+00 | 0.0E+00 |

Energy components, in hartrees:

|     |                               |                   |       |
|-----|-------------------------------|-------------------|-------|
| (A) | Nuclear repulsion.....        | 1451.86306000473  |       |
| (E) | Total one-electron terms..... | -3989.21962866864 |       |
| (I) | Total two-electron terms..... | 1722.21472987980  |       |
| (L) | Electronic energy.....        | -2267.00489878883 | (E+I) |
| (N) | Total energy.....             | -815.14183878410  | (A+L) |

SCFE: SCF energy: HF        -815.14183878410 hartrees    iterations:    7

HOMO energy:        -0.29759  
LUMO energy:         0.11735

Orbital energies:

|           |           |           |           |           |           |
|-----------|-----------|-----------|-----------|-----------|-----------|
| -20.45239 | -15.55202 | -11.32125 | -11.23602 | -11.22309 | -11.21352 |
| -11.20676 | -11.19963 | -11.18787 | -11.18502 | -11.18435 | -11.18373 |
| -11.18187 | -11.18161 | -11.17928 | -11.17794 | -11.17770 | -11.17707 |
| -11.17569 | -11.17257 | -1.42458  | -1.33340  | -1.18087  | -1.16250  |
| -1.11623  | -1.08803  | -1.04122  | -1.02673  | -1.01859  | -1.00091  |
| -0.94724  | -0.90523  | -0.85680  | -0.84369  | -0.83042  | -0.81114  |
| -0.79427  | -0.76289  | -0.72142  | -0.68760  | -0.67960  | -0.66938  |
| -0.65920  | -0.64205  | -0.63831  | -0.62741  | -0.61136  | -0.60668  |
| -0.60285  | -0.59976  | -0.59215  | -0.57736  | -0.56219  | -0.55442  |
| -0.54290  | -0.53061  | -0.51733  | -0.50898  | -0.49853  | -0.49682  |
| -0.49057  | -0.48686  | -0.45902  | -0.42126  | -0.39338  | -0.34851  |
| -0.34197  | -0.31489  | -0.29759  | 0.11735   | 0.13410   | 0.14275   |
| 0.14361   | 0.20495   | 0.22793   | 0.26272   | 0.27164   | 0.27219   |
| 0.30312   |           |           |           |           |           |

end of program scf

```
start of program derla
end of program derla
```

```
start of program rwr
recomputing Rwr matrix 8 grid: 4
recomputing Rwr matrix 14 grid: 4
recomputing Rwr matrix 15 grid: 4
end of program rwr
```

```
start of program derlb
```

```
forces (hartrees/bohr) : total
```

| atom  | label | x             | y             | z             |
|-------|-------|---------------|---------------|---------------|
| 1     | H25   | -3.549107E-04 | -1.312481E-03 | -4.654371E-04 |
| 2     | C1    | 2.948128E-03  | 3.125256E-05  | -2.393555E-03 |
| 3     | C2    | -2.191822E-03 | 1.414811E-03  | 2.699114E-03  |
| 4     | C3    | 9.566401E-05  | 1.682390E-04  | -1.107856E-03 |
| 5     | C4    | -3.138413E-03 | -2.127188E-03 | 1.662089E-03  |
| 6     | C5    | -7.521934E-05 | 5.915997E-04  | 4.453554E-04  |
| 7     | C6    | 2.166193E-03  | 1.016054E-03  | -1.178001E-03 |
| 8     | C7    | 5.389452E-04  | -9.207757E-04 | 4.121693E-04  |
| 9     | H27   | -4.009994E-04 | -9.243191E-04 | -6.372168E-05 |
| 10    | H28   | -1.113595E-03 | -8.504971E-05 | 9.129198E-04  |
| 11    | H30   | 3.161922E-05  | 5.313021E-04  | 2.126557E-04  |
| 12    | C8    | -4.153228E-04 | 2.334546E-04  | -2.032891E-03 |
| 13    | H32   | 9.796271E-05  | 5.056365E-05  | -2.010776E-04 |
| 14    | C10   | 1.580185E-04  | 1.271610E-04  | 7.776333E-04  |
| 15    | N2    | 1.005126E-03  | -5.311359E-04 | 5.106032E-04  |
| 16    | C9    | -1.633117E-03 | -9.966820E-04 | 1.329665E-04  |
| 17    | O1    | 2.531581E-03  | 1.943990E-03  | -3.737449E-04 |
| 18    | H43   | 2.803865E-04  | -3.453601E-04 | 1.793967E-05  |
| 19    | C12   | -6.795762E-04 | -5.949400E-04 | 4.767986E-03  |
| 20    | C11   | 3.256853E-04  | 2.705185E-04  | -2.340315E-04 |
| 21    | C18   | 7.037454E-05  | 2.066673E-04  | -1.018867E-04 |
| 22    | H48   | -3.852887E-04 | 5.383440E-04  | -4.154939E-04 |
| 23    | C13   | -1.125490E-03 | 3.415054E-04  | -4.621396E-04 |
| 24    | C14   | 1.646764E-03  | -1.019525E-03 | 2.303743E-03  |
| 25    | C15   | 6.057403E-04  | 9.784646E-04  | -4.082322E-03 |
| 26    | C16   | 1.406231E-03  | -8.081192E-04 | 5.681943E-04  |
| 27    | C17   | -2.291026E-03 | 1.044472E-03  | -1.566749E-03 |
| 28    | H51   | 8.434672E-05  | 1.534609E-04  | -5.228658E-04 |
| 29    | H52   | 4.621364E-04  | -1.711185E-04 | 6.174486E-04  |
| 30    | H55   | -4.334671E-04 | 3.206865E-04  | -1.050266E-03 |
| 31    | H56   | 4.839442E-04  | -5.399322E-05 | 1.468778E-04  |
| 32    | H59   | 2.006905E-04  | 1.296257E-04  | -1.021161E-03 |
| 33    | H60   | 3.005795E-04  | -1.594849E-04 | 3.052648E-04  |
| 34    | H61   | 6.570786E-05  | 1.872377E-04  | 9.834622E-05  |
| 35    | H62   | -5.966926E-04 | -2.459358E-04 | -8.745436E-05 |
| total |       | 6.708852E-04  | -1.669732E-05 | -7.693460E-04 |

```
end of program derlb
```

```
start of program geopt 7
```



```

geometry optimization step 7
reading input hessian of dimension 105
in five columns format
reading input hessian of dimension 105
in five columns format
reading input hessian of dimension 105
in five columns format

```

Hessian eigenvalues:

|              |             |             |             |             |
|--------------|-------------|-------------|-------------|-------------|
| -2.87940E-03 | 0.00000E+00 | 0.00000E+00 | 0.00000E+00 | 0.00000E+00 |
| 0.00000E+00  | 0.00000E+00 | 0.00000E+00 | 0.00000E+00 | 0.00000E+00 |
| 0.00000E+00  | 0.00000E+00 | 0.00000E+00 | 0.00000E+00 | 0.00000E+00 |
| 0.00000E+00  | 0.00000E+00 | 0.00000E+00 | 0.00000E+00 | 0.00000E+00 |
| 0.00000E+00  | 0.00000E+00 | 0.00000E+00 | 0.00000E+00 | 0.00000E+00 |
| 0.00000E+00  | 0.00000E+00 | 1.28498E-02 | 1.68181E-02 | 2.22253E-02 |
| 2.76269E-02  | 2.82155E-02 | 2.99068E-02 | 3.05349E-02 | 3.09858E-02 |
| 3.52391E-02  | 3.75216E-02 | 4.39536E-02 | 4.75793E-02 | 5.71716E-02 |
| 6.50410E-02  | 7.14085E-02 | 7.16572E-02 | 7.46379E-02 | 7.60955E-02 |
| 8.34621E-02  | 9.73583E-02 | 1.13165E-01 | 1.13620E-01 | 1.18176E-01 |
| 1.26811E-01  | 1.30701E-01 | 1.36730E-01 | 1.42882E-01 | 1.48172E-01 |
| 1.53443E-01  | 1.58627E-01 | 1.62482E-01 | 1.68776E-01 | 1.74496E-01 |
| 1.82894E-01  | 1.90762E-01 | 1.94003E-01 | 1.99691E-01 | 2.01869E-01 |
| 2.14197E-01  | 2.17131E-01 | 2.21420E-01 | 2.24942E-01 | 2.28435E-01 |
| 2.34003E-01  | 2.37765E-01 | 2.42714E-01 | 2.47213E-01 | 2.53769E-01 |
| 2.64928E-01  | 2.71708E-01 | 2.77723E-01 | 2.81706E-01 | 2.91395E-01 |
| 2.98189E-01  | 3.00932E-01 | 3.07917E-01 | 3.10045E-01 | 3.17239E-01 |
| 3.19863E-01  | 3.26661E-01 | 3.28139E-01 | 3.32109E-01 | 3.33026E-01 |
| 3.34130E-01  | 3.36906E-01 | 3.40298E-01 | 3.40774E-01 | 3.44926E-01 |
| 3.49462E-01  | 3.56288E-01 | 3.59335E-01 | 3.66036E-01 | 3.67857E-01 |
| 3.75477E-01  | 3.80370E-01 | 3.87294E-01 | 3.95558E-01 | 4.05120E-01 |
| 4.09901E-01  | 4.19847E-01 | 4.26548E-01 | 4.33150E-01 | 4.42557E-01 |
| 4.51023E-01  | 4.51733E-01 | 4.73814E-01 | 4.78411E-01 | 4.97484E-01 |
| 5.16876E-01  | 5.33545E-01 | 5.52741E-01 | 5.84148E-01 | 5.93832E-01 |
| 6.06656E-01  | 6.98813E-01 | 7.20989E-01 | 9.78238E-01 | 1.05514E+00 |

WARNING: Hessian has wrong number of negative eigenvalues

Level shifts adjusted to satisfy step-size constraints

```

Step size: 0.0379720
Cos(theta): 0.7137646

```

Final level shift: -5.5871828E-02

```

energy change: 1.0254E-04 . ( 5.0000E-05 )
gradient maximum: 4.9000E-03 . ( 4.5000E-04 )
gradient rms: 1.2789E-03 . ( 3.0000E-04 )
step size: 0.03797 trust radius: 0.03750
displacement maximum: 1.2543E-02 . ( 1.8000E-03 )
displacement rms: 3.3963E-03 . ( 1.2000E-03 )
predicted energy change: -2.3405E-04 geom step: 3.7972E-02 full step:
3.7972E-02
molecular structure not yet converged...

```

center of mass moved by:

```

x: 5.0912E-03 y: -1.3135E-03 z: 2.5471E-03

```

new geometry:

|      | angstroms    |               |               |
|------|--------------|---------------|---------------|
| atom | x            | y             | z             |
| H25  | 1.1304575483 | -3.9921035851 | -2.0223686483 |
| Cl   | 1.6103546161 | -3.0340223526 | -2.0479919874 |

|     |               |               |               |
|-----|---------------|---------------|---------------|
| C2  | 2.8956938390  | -0.5173166812 | -2.1328629754 |
| C3  | 1.2107530960  | -2.0192079694 | -1.1878484086 |
| C4  | 2.6403057120  | -2.7853816590 | -2.9355106972 |
| C5  | 3.2763198195  | -1.5408089242 | -2.9777529598 |
| C6  | 1.8642016527  | -0.7793227516 | -1.2524394351 |
| C7  | 0.1884690164  | -1.9244233447 | -0.1395088531 |
| H27 | 2.9602461201  | -3.5583927620 | -3.6047953603 |
| H28 | 4.0724961332  | -1.3804314230 | -3.6765582871 |
| H30 | 3.3635227961  | 0.4449102599  | -2.1381457079 |
| C8  | 0.2673971942  | -0.6849857375 | 0.3633679125  |
| H32 | -0.4899649017 | -2.6948834938 | 0.1480698793  |
| C10 | -0.3871247045 | 0.2217244711  | 1.3780689010  |
| N2  | 1.2733971810  | 0.0250112506  | -0.2941141098 |
| C9  | 1.5052068394  | 1.2915174966  | 0.1870810776  |
| O1  | 2.3290656544  | 2.0634864919  | -0.2439244126 |
| H43 | -0.4059057206 | -0.2450768510 | 2.3531839185  |
| C12 | -1.8049107586 | 0.5967079428  | 0.9729449283  |
| C11 | 0.5764813534  | 1.4606745919  | 1.3973271674  |
| C18 | 1.4584461100  | 1.4976634528  | 2.6623521684  |
| H48 | 0.0265433002  | 2.3842861566  | 1.3063064802  |
| C13 | -3.3717927552 | 1.3800084771  | -0.6758632669 |
| C14 | -4.1197352771 | 0.9286289624  | 1.5519935533  |
| C15 | -4.3934752658 | 1.3414062776  | 0.2619192622  |
| C16 | -2.8299413023 | 0.5589892031  | 1.9042785285  |
| C17 | -2.0882920786 | 1.0086508593  | -0.3236899923 |
| H51 | -5.3894168668 | 1.6255825028  | -0.0141532133 |
| H52 | -2.6280396446 | 0.2346686876  | 2.9061398439  |
| H55 | -3.5778302639 | 1.6942319322  | -1.6787475128 |
| H56 | -4.9034454704 | 0.8890892561  | 2.2823975416  |
| H59 | -1.3084314624 | 1.0236122911  | -1.0581471708 |
| H60 | 1.9926736480  | 0.5611298974  | 2.7758150110  |
| H61 | 0.8458662596  | 1.6582721173  | 3.5416060184  |
| H62 | 2.1803557495  | 2.3012179601  | 2.5869501030  |

nuclear repulsion energy..... 1451.630424855 hartrees

/ end of geometry optimization iteration 7 /

end of program geopt

start of program onee

smallest eigenvalue of S: 1.220E-03

number of canonical orbitals..... 210

end of program onee

start of program probe

end of program probe

start of program grid

number of gridpoints:

| atom     | H25 | C1  | C2  | C3  | C4  | C5  | C6  | C7  |
|----------|-----|-----|-----|-----|-----|-----|-----|-----|
| grid # 1 | 73  | 89  | 87  | 90  | 87  | 87  | 85  | 85  |
| grid # 2 | 106 | 100 | 97  | 98  | 98  | 99  | 90  | 92  |
| grid # 3 | 224 | 183 | 183 | 194 | 182 | 182 | 187 | 183 |
| grid # 4 | 224 | 379 | 382 | 406 | 379 | 379 | 373 | 377 |

number of gridpoints:

|          |     |     |     |     |     |     |     |     |
|----------|-----|-----|-----|-----|-----|-----|-----|-----|
| atom     | H27 | H28 | H30 | C8  | H32 | C10 | N2  | C9  |
| grid # 1 | 73  | 73  | 73  | 85  | 73  | 81  | 100 | 76  |
| grid # 2 | 106 | 106 | 105 | 91  | 106 | 92  | 108 | 81  |
| grid # 3 | 224 | 224 | 220 | 189 | 223 | 176 | 223 | 165 |
| grid # 4 | 224 | 224 | 219 | 374 | 229 | 351 | 401 | 327 |

number of gridpoints:

|          |     |     |     |     |     |     |     |     |
|----------|-----|-----|-----|-----|-----|-----|-----|-----|
| atom     | O1  | H43 | C12 | C11 | C18 | H48 | C13 | C14 |
| grid # 1 | 111 | 69  | 90  | 82  | 72  | 70  | 88  | 87  |
| grid # 2 | 123 | 98  | 105 | 91  | 74  | 101 | 100 | 100 |
| grid # 3 | 272 | 208 | 191 | 175 | 141 | 217 | 183 | 183 |
| grid # 4 | 474 | 201 | 400 | 353 | 306 | 209 | 379 | 379 |

number of gridpoints:

|          |     |     |     |     |     |     |     |     |
|----------|-----|-----|-----|-----|-----|-----|-----|-----|
| atom     | C15 | C16 | C17 | H51 | H52 | H55 | H56 | H59 |
| grid # 1 | 89  | 87  | 86  | 73  | 73  | 73  | 73  | 71  |
| grid # 2 | 100 | 100 | 97  | 106 | 104 | 106 | 106 | 101 |
| grid # 3 | 183 | 182 | 181 | 224 | 214 | 224 | 224 | 216 |
| grid # 4 | 379 | 377 | 376 | 224 | 214 | 224 | 224 | 213 |

number of gridpoints:

|          |     |     |     |       |
|----------|-----|-----|-----|-------|
| atom     | H60 | H61 | H62 | total |
| grid # 1 | 71  | 71  | 71  | 2824  |
| grid # 2 | 99  | 99  | 99  | 3484  |
| grid # 3 | 217 | 218 | 220 | 7035  |
| grid # 4 | 217 | 220 | 221 | 10838 |

end of program grid

start of program rwr

recomputing RwR matrix 8 grid: 4

recomputing RwR matrix 15 grid: 4

end of program rwr

start of program scf

|      | i | u | d | i | g |                  |          | RMS     | maximum |
|------|---|---|---|---|---|------------------|----------|---------|---------|
|      | t | p | i | c | r |                  |          | density | DIIS    |
|      | e | d | i | u | i |                  | energy   | change  | error   |
|      | r | t | s | t | d | total energy     | change   |         |         |
| etot | 1 | N | N | 1 | U | -815.14145440966 |          | 1.2E-04 | 2.5E-03 |
| etot | 2 | Y | Y | 4 | M | -815.14195316309 | 5.0E-04  | 4.2E-05 | 8.6E-04 |
| etot | 3 | Y | Y | 4 | M | -815.14201092146 | 5.8E-05  | 1.4E-05 | 3.0E-04 |
| etot | 4 | Y | Y | 4 | M | -815.14201703015 | 6.1E-06  | 4.9E-06 | 8.7E-05 |
| etot | 5 | Y | N | 4 | M | -815.14201598780 | -1.0E-06 | 0.0E+00 | 0.0E+00 |

Energy components, in hartrees:

|     |                               |                   |       |
|-----|-------------------------------|-------------------|-------|
| (A) | Nuclear repulsion.....        | 1451.63042485522  |       |
| (E) | Total one-electron terms..... | -3988.76080780577 |       |
| (I) | Total two-electron terms..... | 1721.98836696276  |       |
| (L) | Electronic energy.....        | -2266.77244084302 | (E+I) |
| (N) | Total energy.....             | -815.14201598780  | (A+L) |

SCFE: SCF energy: HF -815.14201598780 hartrees iterations: 5

HOMO energy: -0.29705

LUMO energy: 0.11717

Orbital energies:

|           |           |           |           |           |           |
|-----------|-----------|-----------|-----------|-----------|-----------|
| -20.45246 | -15.55228 | -11.32161 | -11.23593 | -11.22288 | -11.21347 |
| -11.20686 | -11.19990 | -11.18803 | -11.18516 | -11.18468 | -11.18390 |
| -11.18226 | -11.18207 | -11.17923 | -11.17786 | -11.17761 | -11.17704 |
| -11.17571 | -11.17252 | -1.42383  | -1.33339  | -1.18044  | -1.16235  |
| -1.11604  | -1.08798  | -1.04101  | -1.02669  | -1.01949  | -1.00018  |
| -0.94682  | -0.90544  | -0.85640  | -0.84360  | -0.83008  | -0.81170  |
| -0.79418  | -0.76269  | -0.72113  | -0.68763  | -0.67952  | -0.66924  |
| -0.65909  | -0.64197  | -0.63817  | -0.62708  | -0.61186  | -0.60637  |
| -0.60360  | -0.59929  | -0.59188  | -0.57736  | -0.56180  | -0.55417  |
| -0.54247  | -0.53056  | -0.51726  | -0.50880  | -0.49842  | -0.49675  |
| -0.49058  | -0.48676  | -0.45896  | -0.42142  | -0.39357  | -0.34852  |
| -0.34165  | -0.31535  | -0.29705  | 0.11717   | 0.13380   | 0.14261   |
| 0.14385   | 0.20469   | 0.22800   | 0.26291   | 0.27131   | 0.27218   |
| 0.30303   |           |           |           |           |           |

end of program scf

start of program derla

end of program derla

start of program rwr

recomputing RwR matrix 8 grid: 4

recomputing RwR matrix 14 grid: 4

recomputing RwR matrix 15 grid: 4

end of program rwr

start of program derlb

forces (hartrees/bohr) : total

| atom | label | x             | y             | z             |
|------|-------|---------------|---------------|---------------|
| 1    | H25   | 1.359723E-05  | -3.466478E-05 | -9.627447E-05 |
| 2    | C1    | 6.984586E-05  | -8.738348E-05 | 1.093295E-04  |
| 3    | C2    | -1.319643E-04 | -1.656861E-04 | -1.037726E-05 |
| 4    | C3    | 2.655846E-04  | 1.622017E-05  | -4.230537E-04 |
| 5    | C4    | -5.586107E-04 | 3.924010E-04  | 4.933160E-04  |
| 6    | C5    | -2.069762E-04 | 1.709694E-04  | 4.202626E-04  |
| 7    | C6    | -6.852514E-05 | -1.981003E-04 | -1.924660E-04 |
| 8    | C7    | -1.093526E-04 | -2.980572E-04 | -2.523597E-04 |
| 9    | H27   | 4.660699E-05  | -1.978032E-04 | -1.606840E-04 |
| 10   | H28   | 4.669475E-05  | 4.338915E-05  | -6.914025E-05 |
| 11   | H30   | -8.643284E-05 | -2.657687E-04 | -6.115228E-05 |
| 12   | C8    | -1.886639E-04 | 4.370352E-04  | -6.357514E-04 |
| 13   | H32   | 2.428191E-04  | 2.785829E-04  | -1.475581E-04 |
| 14   | C10   | 5.081719E-04  | -7.293809E-05 | 2.757845E-04  |
| 15   | N2    | 5.079031E-04  | -1.008795E-03 | 4.313145E-04  |
| 16   | C9    | -6.598653E-04 | 1.170071E-04  | -3.315036E-04 |
| 17   | O1    | 1.019859E-03  | 2.695101E-04  | 1.838224E-04  |
| 18   | H43   | 1.738924E-05  | -2.308942E-04 | 1.984537E-05  |
| 19   | C12   | -1.990921E-04 | 2.702134E-04  | 6.734142E-04  |
| 20   | C11   | 3.195800E-05  | 4.399625E-05  | -2.540453E-04 |
| 21   | C18   | -3.068506E-04 | 1.003346E-04  | 1.684667E-04  |
| 22   | H48   | -1.744972E-04 | 3.764032E-04  | -5.523677E-04 |
| 23   | C13   | 2.007050E-04  | -1.303334E-04 | 4.827240E-04  |
| 24   | C14   | 2.046691E-04  | -2.081235E-04 | 1.992330E-04  |
| 25   | C15   | 1.416486E-04  | 5.121125E-05  | -1.482842E-04 |

|       |       |               |               |               |
|-------|-------|---------------|---------------|---------------|
| 26    | C16   | -1.503977E-04 | -1.279791E-04 | -5.156088E-04 |
| 27    | C17   | -6.621979E-04 | 1.208096E-04  | 2.363045E-05  |
| 28    | H51   | 2.143096E-04  | 1.999889E-05  | -3.413987E-05 |
| 29    | H52   | 1.716950E-04  | -7.173134E-06 | 6.103983E-04  |
| 30    | H55   | -3.052410E-05 | 1.383420E-04  | -6.379178E-04 |
| 31    | H56   | 1.587479E-04  | 5.936810E-05  | 3.700326E-05  |
| 32    | H59   | 1.189039E-04  | 1.250673E-04  | -4.216355E-04 |
| 33    | H60   | 2.160504E-04  | 1.988591E-05  | 1.999422E-04  |
| 34    | H61   | 1.747293E-04  | 5.555274E-05  | -6.674281E-05 |
| 35    | H62   | -1.577312E-04 | -5.750897E-05 | -5.049632E-05 |
| ----- |       |               |               |               |
|       | total | 6.802065E-04  | 1.508895E-05  | -7.330719E-04 |

end of program derlb

start of program geopt 8

geometry optimization step 8  
 reading input hessian of dimension 105  
 in five columns format  
 reading input hessian of dimension 105  
 in five columns format  
 reading input hessian of dimension 105  
 in five columns format

Hessian eigenvalues:

|              |             |             |             |             |
|--------------|-------------|-------------|-------------|-------------|
| -2.84991E-03 | 0.00000E+00 | 0.00000E+00 | 0.00000E+00 | 0.00000E+00 |
| 0.00000E+00  | 0.00000E+00 | 0.00000E+00 | 0.00000E+00 | 0.00000E+00 |
| 0.00000E+00  | 0.00000E+00 | 0.00000E+00 | 0.00000E+00 | 0.00000E+00 |
| 0.00000E+00  | 0.00000E+00 | 0.00000E+00 | 0.00000E+00 | 0.00000E+00 |
| 0.00000E+00  | 0.00000E+00 | 0.00000E+00 | 0.00000E+00 | 0.00000E+00 |
| 0.00000E+00  | 0.00000E+00 | 1.16747E-02 | 1.66619E-02 | 2.18108E-02 |
| 2.77488E-02  | 2.82930E-02 | 2.99327E-02 | 3.06019E-02 | 3.10905E-02 |
| 3.55518E-02  | 3.76366E-02 | 4.40449E-02 | 4.74103E-02 | 5.73189E-02 |
| 6.47717E-02  | 7.12975E-02 | 7.17910E-02 | 7.47763E-02 | 7.58519E-02 |
| 8.40352E-02  | 9.71205E-02 | 1.12824E-01 | 1.13260E-01 | 1.18101E-01 |
| 1.26076E-01  | 1.30728E-01 | 1.37144E-01 | 1.42724E-01 | 1.48315E-01 |
| 1.54579E-01  | 1.58912E-01 | 1.62220E-01 | 1.72879E-01 | 1.74848E-01 |
| 1.82750E-01  | 1.90712E-01 | 1.92131E-01 | 1.97594E-01 | 2.01027E-01 |
| 2.14666E-01  | 2.16803E-01 | 2.20894E-01 | 2.25450E-01 | 2.28071E-01 |
| 2.34154E-01  | 2.36386E-01 | 2.41536E-01 | 2.46640E-01 | 2.53741E-01 |
| 2.64441E-01  | 2.70333E-01 | 2.76460E-01 | 2.81568E-01 | 2.91083E-01 |
| 2.97838E-01  | 3.01183E-01 | 3.08951E-01 | 3.10872E-01 | 3.16983E-01 |
| 3.19750E-01  | 3.25911E-01 | 3.27597E-01 | 3.30560E-01 | 3.33441E-01 |
| 3.34321E-01  | 3.35622E-01 | 3.40532E-01 | 3.41131E-01 | 3.44604E-01 |
| 3.50231E-01  | 3.58686E-01 | 3.60702E-01 | 3.66193E-01 | 3.68620E-01 |
| 3.75241E-01  | 3.80533E-01 | 3.87468E-01 | 3.99131E-01 | 4.08245E-01 |
| 4.13679E-01  | 4.19971E-01 | 4.27180E-01 | 4.31716E-01 | 4.42599E-01 |
| 4.49823E-01  | 4.54994E-01 | 4.67029E-01 | 4.79115E-01 | 5.01733E-01 |
| 5.10848E-01  | 5.44815E-01 | 5.67088E-01 | 5.87132E-01 | 6.03253E-01 |
| 6.20295E-01  | 7.12092E-01 | 7.26271E-01 | 9.78631E-01 | 1.03972E+00 |

WARNING: Hessian has wrong number of negative eigenvalues

Level shifts adjusted to satisfy step-size constraints  
 Step size: 0.0750360  
 Cos(theta): 0.6395471

Final level shift: -1.7960771E-02

```

energy change:          -1.7720E-04 . ( 5.0000E-05 )
gradient maximum:       1.5447E-03 . ( 4.5000E-04 )
gradient rms:           3.7106E-04 . ( 3.0000E-04 )
step size: 0.07504 trust radius: 0.07500
displacement maximum:   3.2181E-02 . ( 1.8000E-03 )
displacement rms:       6.7114E-03 . ( 1.2000E-03 )
predicted energy change: -1.5010E-04 geom step: 7.5035E-02 full step:
7.5035E-02
molecular structure not yet converged...

```

```

center of mass moved by:
  x:      8.1731E-03      y:      -5.5014E-03      z:      5.1929E-04

```

new geometry:

|      | angstroms     |               |               |
|------|---------------|---------------|---------------|
| atom | x             | y             | z             |
| H25  | 1.1063601647  | -3.9870092790 | -2.0452324985 |
| C1   | 1.5963033244  | -3.0332824553 | -2.0624581680 |
| C2   | 2.9082421845  | -0.5277214253 | -2.1277649857 |
| C3   | 1.2020680045  | -2.0180591705 | -1.2014906554 |
| C4   | 2.6341361679  | -2.7892575422 | -2.9416721274 |
| C5   | 3.2835240845  | -1.5504740206 | -2.9743891415 |
| C6   | 1.8692936381  | -0.7844522203 | -1.2556322063 |
| C7   | 0.1736546567  | -1.9165634462 | -0.1592266790 |
| H27  | 2.9510371809  | -3.5622435396 | -3.6127502977 |
| H28  | 4.0861831249  | -1.3945294522 | -3.6671583099 |
| H30  | 3.3852717326  | 0.4300307804  | -2.1256219085 |
| C8   | 0.2621841061  | -0.6793939169 | 0.3486986116  |
| H32  | -0.5142822183 | -2.6810989061 | 0.1215825902  |
| C10  | -0.3869336810 | 0.2276811268  | 1.3673784363  |
| N2   | 1.2819781155  | 0.0217669200  | -0.2971937505 |
| C9   | 1.5269808236  | 1.2838405642  | 0.1910019694  |
| O1   | 2.3775862481  | 2.0428190466  | -0.2191360938 |
| H43  | -0.3991593459 | -0.2423683134 | 2.3413595320  |
| C12  | -1.8079918129 | 0.6006504425  | 0.9725428117  |
| C11  | 0.5759100158  | 1.4678044441  | 1.3840084778  |
| C18  | 1.4315997535  | 1.5286704387  | 2.6674593726  |
| H48  | 0.0252467188  | 2.3903207426  | 1.2654037278  |
| C13  | -3.3843308533 | 1.3896797026  | -0.6634034697 |
| C14  | -4.1209093015 | 0.9151067508  | 1.5642827306  |
| C15  | -4.4014578254 | 1.3375403390  | 0.2787158627  |
| C16  | -2.8281628251 | 0.5494031016  | 1.9081752297  |
| C17  | -2.0981735835 | 1.0220017306  | -0.3196356927 |
| H51  | -5.3995339594 | 1.6193548036  | 0.0089282867  |
| H52  | -2.6188504895 | 0.2183021511  | 2.9066265597  |
| H55  | -3.5967054701 | 1.7114671876  | -1.6630468274 |
| H56  | -4.9008204062 | 0.8658707472  | 2.2972748063  |
| H59  | -1.3206074296 | 1.0473525944  | -1.0563633122 |
| H60  | 1.9695248998  | 0.5968848284  | 2.8095489974  |
| H61  | 0.8009004094  | 1.7017120169  | 3.5327472740  |
| H62  | 2.1485057528  | 2.3351986463  | 2.5922022874  |

nuclear repulsion energy..... 1450.522675623 hartrees

/ end of geometry optimization iteration 8 /

end of program geopt

start of program onee

smallest eigenvalue of S: 1.219E-03

number of canonical orbitals..... 210  
 end of program onee

start of program probe  
 end of program probe

start of program grid

number of gridpoints:

|          |     |     |     |     |     |     |     |     |
|----------|-----|-----|-----|-----|-----|-----|-----|-----|
| atom     | H25 | C1  | C2  | C3  | C4  | C5  | C6  | C7  |
| grid # 1 | 73  | 89  | 87  | 90  | 87  | 87  | 85  | 85  |
| grid # 2 | 106 | 100 | 97  | 98  | 98  | 99  | 90  | 92  |
| grid # 3 | 224 | 183 | 182 | 194 | 182 | 182 | 187 | 183 |
| grid # 4 | 224 | 379 | 382 | 404 | 379 | 379 | 373 | 377 |

number of gridpoints:

|          |     |     |     |     |     |     |     |     |
|----------|-----|-----|-----|-----|-----|-----|-----|-----|
| atom     | H27 | H28 | H30 | C8  | H32 | C10 | N2  | C9  |
| grid # 1 | 73  | 73  | 73  | 85  | 73  | 81  | 99  | 77  |
| grid # 2 | 106 | 106 | 105 | 91  | 106 | 92  | 108 | 81  |
| grid # 3 | 224 | 224 | 220 | 189 | 223 | 175 | 223 | 167 |
| grid # 4 | 224 | 224 | 218 | 375 | 229 | 351 | 401 | 329 |

number of gridpoints:

|          |     |     |     |     |     |     |     |     |
|----------|-----|-----|-----|-----|-----|-----|-----|-----|
| atom     | O1  | H43 | C12 | C11 | C18 | H48 | C13 | C14 |
| grid # 1 | 111 | 68  | 90  | 82  | 72  | 70  | 87  | 87  |
| grid # 2 | 127 | 98  | 105 | 91  | 74  | 100 | 100 | 100 |
| grid # 3 | 271 | 208 | 190 | 175 | 146 | 217 | 183 | 183 |
| grid # 4 | 474 | 202 | 400 | 354 | 309 | 209 | 379 | 379 |

number of gridpoints:

|          |     |     |     |     |     |     |     |     |
|----------|-----|-----|-----|-----|-----|-----|-----|-----|
| atom     | C15 | C16 | C17 | H51 | H52 | H55 | H56 | H59 |
| grid # 1 | 89  | 86  | 86  | 73  | 73  | 73  | 73  | 71  |
| grid # 2 | 100 | 100 | 97  | 106 | 104 | 106 | 106 | 101 |
| grid # 3 | 183 | 182 | 181 | 224 | 214 | 224 | 224 | 216 |
| grid # 4 | 379 | 378 | 376 | 224 | 214 | 224 | 224 | 213 |

number of gridpoints:

|          |     |     |     |       |
|----------|-----|-----|-----|-------|
| atom     | H60 | H61 | H62 | total |
| grid # 1 | 71  | 71  | 71  | 2821  |
| grid # 2 | 99  | 99  | 99  | 3487  |
| grid # 3 | 217 | 218 | 220 | 7038  |
| grid # 4 | 217 | 221 | 221 | 10845 |

end of program grid

start of program rwr

|                        |    |       |   |
|------------------------|----|-------|---|
| recomputing RwR matrix | 14 | grid: | 4 |
| recomputing RwR matrix | 15 | grid: | 4 |
| end of program rwr     |    |       |   |

start of program scf

|      |   |   |   |   |              |                  |                                          |
|------|---|---|---|---|--------------|------------------|------------------------------------------|
| i    | u | d | i | g |              |                  |                                          |
| t    | p | i | c | r |              |                  |                                          |
| e    | d | i | u | i |              |                  |                                          |
| r    | t | s | t | d | total energy | energy change    | RMS density change<br>maximum DIIS error |
| etot | 1 | N | N | 1 | U            | -815.14007792910 | 1.9E-04 6.4E-03                          |

|      |   |   |   |   |   |                  |         |         |         |
|------|---|---|---|---|---|------------------|---------|---------|---------|
| etot | 2 | Y | Y | 4 | M | -815.14181569357 | 1.7E-03 | 7.7E-05 | 1.7E-03 |
| etot | 3 | Y | Y | 4 | M | -815.14200816908 | 1.9E-04 | 2.4E-05 | 5.1E-04 |
| etot | 4 | Y | Y | 4 | M | -815.14202093310 | 1.3E-05 | 7.1E-06 | 1.6E-04 |
| etot | 5 | Y | Y | 4 | M | -815.14202247037 | 1.5E-06 | 3.7E-06 | 8.3E-05 |
| etot | 6 | N | N | 1 | U | -815.14203198333 | 9.5E-06 | 0.0E+00 | 0.0E+00 |

Energy components, in hartrees:

|     |                               |                   |       |
|-----|-------------------------------|-------------------|-------|
| (A) | Nuclear repulsion.....        | 1450.52267562349  |       |
| (E) | Total one-electron terms..... | -3986.55076182828 |       |
| (I) | Total two-electron terms..... | 1720.88605422146  |       |
| (L) | Electronic energy.....        | -2265.66470760682 | (E+I) |
| (N) | Total energy.....             | -815.14203198333  | (A+L) |

SCFE: SCF energy: HF      -815.14203198333 hartrees      iterations:      6

HOMO energy:      -0.29709

LUMO energy:      0.11720

Orbital energies:

|           |           |           |           |           |           |
|-----------|-----------|-----------|-----------|-----------|-----------|
| -20.45243 | -15.55265 | -11.32224 | -11.23613 | -11.22272 | -11.21357 |
| -11.20753 | -11.19998 | -11.18805 | -11.18526 | -11.18476 | -11.18410 |
| -11.18244 | -11.18225 | -11.17920 | -11.17785 | -11.17769 | -11.17683 |
| -11.17566 | -11.17254 | -1.42182  | -1.33298  | -1.18052  | -1.16241  |
| -1.11575  | -1.08798  | -1.04089  | -1.02706  | -1.01945  | -1.00027  |
| -0.94661  | -0.90552  | -0.85598  | -0.84374  | -0.83025  | -0.81169  |
| -0.79411  | -0.76262  | -0.72117  | -0.68749  | -0.67918  | -0.66917  |
| -0.65867  | -0.64169  | -0.63844  | -0.62689  | -0.61183  | -0.60600  |
| -0.60374  | -0.59983  | -0.59177  | -0.57722  | -0.56106  | -0.55404  |
| -0.54197  | -0.53052  | -0.51699  | -0.50859  | -0.49867  | -0.49685  |
| -0.49064  | -0.48662  | -0.45873  | -0.42153  | -0.39363  | -0.34889  |
| -0.34173  | -0.31519  | -0.29709  | 0.11720   | 0.13386   | 0.14187   |
| 0.14388   | 0.20446   | 0.22741   | 0.26321   | 0.27109   | 0.27232   |
| 0.30232   |           |           |           |           |           |

end of program scf

start of program derla

end of program derla

start of program rwr

recomputing RwR matrix 14      grid: 4

recomputing RwR matrix 15      grid: 4

end of program rwr

start of program derlb

forces (hartrees/bohr) : total

| atom | label | x             | y             | z             |
|------|-------|---------------|---------------|---------------|
| 1    | H25   | 2.151525E-04  | 3.452281E-04  | -6.647457E-05 |
| 2    | C1    | 1.794360E-04  | -1.146222E-04 | -3.645931E-04 |
| 3    | C2    | -1.230370E-05 | 2.254646E-04  | 4.319000E-05  |
| 4    | C3    | -3.025544E-04 | 8.388521E-04  | 7.246500E-04  |
| 5    | C4    | 2.202499E-04  | 2.511949E-04  | -1.524686E-04 |
| 6    | C5    | -1.217790E-04 | -8.074701E-04 | -1.583113E-04 |
| 7    | C6    | -2.886297E-04 | -6.180385E-04 | 2.798466E-04  |



|       |       |               |               |               |
|-------|-------|---------------|---------------|---------------|
| 8     | C7    | 5.580646E-04  | 1.076805E-03  | -4.735068E-04 |
| 9     | H27   | 4.775464E-05  | -7.114309E-05 | -1.231767E-04 |
| 10    | H28   | -1.673694E-04 | -1.654768E-04 | -3.054557E-05 |
| 11    | H30   | -3.120362E-05 | -3.266614E-04 | 9.920676E-05  |
| 12    | C8    | -5.646786E-05 | 2.884200E-04  | -3.812072E-04 |
| 13    | H32   | 2.397471E-04  | 3.502991E-04  | -2.095105E-04 |
| 14    | C10   | 4.347537E-04  | -2.801396E-04 | -2.362437E-04 |
| 15    | N2    | 2.554949E-04  | 1.417855E-04  | 1.158685E-04  |
| 16    | C9    | 2.598188E-03  | 1.512231E-03  | -3.135181E-04 |
| 17    | O1    | -3.220044E-03 | -3.015410E-03 | 1.432737E-03  |
| 18    | H43   | 9.812906E-05  | 6.500958E-05  | -1.883177E-05 |
| 19    | C12   | 2.375540E-04  | 3.491293E-05  | 6.577273E-04  |
| 20    | C11   | 2.202340E-04  | 6.383109E-04  | -3.733141E-05 |
| 21    | C18   | -9.345108E-04 | -7.344537E-05 | 1.779801E-04  |
| 22    | H48   | 4.783621E-04  | -8.376759E-04 | -1.165117E-04 |
| 23    | C13   | -1.761107E-04 | 1.671738E-05  | 1.887860E-04  |
| 24    | C14   | 2.235509E-04  | 1.711319E-05  | -2.486657E-04 |
| 25    | C15   | -4.913747E-05 | 6.777839E-05  | -8.447060E-05 |
| 26    | C16   | 2.301537E-04  | -1.667323E-04 | -3.756136E-04 |
| 27    | C17   | -2.662000E-04 | 2.726817E-05  | 2.184171E-04  |
| 28    | H51   | 3.186343E-06  | 3.044865E-05  | -2.503557E-05 |
| 29    | H52   | 7.541528E-06  | 3.055187E-05  | 3.880094E-04  |
| 30    | H55   | 2.138375E-05  | 4.577399E-05  | -2.987936E-04 |
| 31    | H56   | -2.316066E-04 | 4.774150E-05  | 2.720347E-04  |
| 32    | H59   | 1.243942E-04  | 8.148390E-05  | -4.135743E-04 |
| 33    | H60   | -2.821691E-04 | 6.983565E-04  | -2.630499E-04 |
| 34    | H61   | 3.196842E-04  | -1.311751E-04 | -8.559559E-04 |
| 35    | H62   | 6.262002E-04  | 3.445098E-04  | -3.637170E-05 |
| ----- |       |               |               |               |
|       | total | 1.199130E-03  | 5.682665E-04  | -6.853084E-04 |

end of program derlb

start of program geopt 9

geometry optimization step 9  
 reading input hessian of dimension 105  
 in five columns format  
 reading input hessian of dimension 105  
 in five columns format  
 reading input hessian of dimension 105  
 in five columns format

Hessian eigenvalues:

|              |             |             |             |             |
|--------------|-------------|-------------|-------------|-------------|
| -3.41506E-03 | 0.00000E+00 | 0.00000E+00 | 0.00000E+00 | 0.00000E+00 |
| 0.00000E+00  | 0.00000E+00 | 0.00000E+00 | 0.00000E+00 | 0.00000E+00 |
| 0.00000E+00  | 0.00000E+00 | 0.00000E+00 | 0.00000E+00 | 0.00000E+00 |
| 0.00000E+00  | 0.00000E+00 | 0.00000E+00 | 0.00000E+00 | 0.00000E+00 |
| 0.00000E+00  | 0.00000E+00 | 0.00000E+00 | 0.00000E+00 | 0.00000E+00 |
| 0.00000E+00  | 0.00000E+00 | 4.46929E-03 | 1.62774E-02 | 2.14807E-02 |
| 2.77115E-02  | 2.82544E-02 | 2.99957E-02 | 3.07637E-02 | 3.10674E-02 |
| 3.59918E-02  | 3.76513E-02 | 4.39400E-02 | 4.64681E-02 | 5.96547E-02 |
| 6.48433E-02  | 7.12813E-02 | 7.20029E-02 | 7.49545E-02 | 7.84677E-02 |
| 8.38467E-02  | 9.79209E-02 | 1.11915E-01 | 1.13168E-01 | 1.19062E-01 |
| 1.24938E-01  | 1.29905E-01 | 1.36517E-01 | 1.42226E-01 | 1.45355E-01 |
| 1.54938E-01  | 1.58608E-01 | 1.60936E-01 | 1.72250E-01 | 1.77966E-01 |
| 1.83199E-01  | 1.85586E-01 | 1.91584E-01 | 1.97395E-01 | 2.11259E-01 |
| 2.13553E-01  | 2.18859E-01 | 2.19879E-01 | 2.24296E-01 | 2.27687E-01 |
| 2.32712E-01  | 2.35497E-01 | 2.45301E-01 | 2.51047E-01 | 2.55495E-01 |
| 2.66520E-01  | 2.70597E-01 | 2.76401E-01 | 2.88957E-01 | 2.91921E-01 |
| 3.00259E-01  | 3.04909E-01 | 3.08606E-01 | 3.13711E-01 | 3.14770E-01 |

|             |             |             |             |             |
|-------------|-------------|-------------|-------------|-------------|
| 3.20737E-01 | 3.25794E-01 | 3.27252E-01 | 3.30359E-01 | 3.33092E-01 |
| 3.34343E-01 | 3.38988E-01 | 3.41894E-01 | 3.44691E-01 | 3.50415E-01 |
| 3.55816E-01 | 3.61838E-01 | 3.62388E-01 | 3.71926E-01 | 3.75622E-01 |
| 3.80629E-01 | 3.86357E-01 | 3.91054E-01 | 4.00131E-01 | 4.10738E-01 |
| 4.19487E-01 | 4.24022E-01 | 4.30906E-01 | 4.39770E-01 | 4.44996E-01 |
| 4.48205E-01 | 4.60922E-01 | 4.71171E-01 | 4.82270E-01 | 5.03382E-01 |
| 5.24339E-01 | 5.65473E-01 | 5.67342E-01 | 5.90272E-01 | 6.24797E-01 |
| 6.42955E-01 | 7.30373E-01 | 7.75522E-01 | 9.88215E-01 | 1.33572E+00 |

WARNING: Hessian has wrong number of negative eigenvalues

Level shifts adjusted to satisfy step-size constraints

Step size: 0.1502620

Cos(theta): 0.3321007

Final level shift: -1.1513599E-02

energy change: -1.5996E-05 \* ( 5.0000E-05 )

gradient maximum: 4.6815E-03 . ( 4.5000E-04 )

gradient rms: 6.4190E-04 . ( 3.0000E-04 )

step size: 0.15026 trust radius: 0.15000

displacement maximum: 6.3053E-02 . ( 1.8000E-03 )

displacement rms: 1.3439E-02 . ( 1.2000E-03 )

predicted energy change: -3.0904E-04 geom step: 1.5026E-01 full step: 1.5026E-01

molecular structure not yet converged...

center of mass moved by:

x: 1.5277E-02 y: -1.1446E-02 z: 3.3764E-03

new geometry:

|      | angstroms     |               |               |
|------|---------------|---------------|---------------|
| atom | x             | y             | z             |
| H25  | 1.0655987271  | -3.9590741881 | -2.1204504494 |
| C1   | 1.5755939062  | -3.0167557911 | -2.1110121679 |
| C2   | 2.9393133247  | -0.5449249047 | -2.1106873309 |
| C3   | 1.1894524556  | -2.0090837086 | -1.2376843258 |
| C4   | 2.6302323204  | -2.7822618974 | -2.9711912185 |
| C5   | 3.3060380331  | -1.5602405230 | -2.9708968562 |
| C6   | 1.8826004065  | -0.7915550796 | -1.2589225019 |
| C7   | 0.1513970485  | -1.9007255209 | -0.2070092283 |
| H27  | 2.9391190397  | -3.5500032684 | -3.6516822109 |
| H28  | 4.1202339816  | -1.4096731420 | -3.6472782967 |
| H30  | 3.4334597078  | 0.4024675329  | -2.0821562169 |
| C8   | 0.2532816522  | -0.6741997933 | 0.3185977997  |
| H32  | -0.5534530323 | -2.6547333772 | 0.0537218948  |
| C10  | -0.3905123529 | 0.2279109976  | 1.3468661949  |
| N2   | 1.3009984633  | 0.0126234756  | -0.2964436311 |
| C9   | 1.5651064129  | 1.2602487938  | 0.2133747160  |
| O1   | 2.4519315836  | 1.9986220735  | -0.1559371925 |
| H43  | -0.3908321367 | -0.2517535221 | 2.3155866720  |
| C12  | -1.8161238604 | 0.5998801892  | 0.9732124515  |
| C11  | 0.5701565318  | 1.4698888187  | 1.3656002249  |
| C18  | 1.3719500898  | 1.5812503810  | 2.6797428850  |
| H48  | 0.0192196153  | 2.3841247940  | 1.1952421435  |
| C13  | -3.4179072666 | 1.3642289738  | -0.6535357753 |
| C14  | -4.1124566332 | 0.9416513048  | 1.6022960432  |
| C15  | -4.4151208966 | 1.3386663450  | 0.3105771586  |
| C16  | -2.8160355919 | 0.5751117222  | 1.9305311524  |
| C17  | -2.1289382608 | 0.9957159069  | -0.3245894278 |

|     |               |              |               |
|-----|---------------|--------------|---------------|
| H51 | -5.4141710032 | 1.6219890646 | 0.0528805200  |
| H52 | -2.5860782016 | 0.2691957261 | 2.9339715988  |
| H55 | -3.6477402783 | 1.6647796775 | -1.6582041895 |
| H56 | -4.8759408388 | 0.9156230927 | 2.3516536290  |
| H59 | -1.3641499061 | 1.0003125833 | -1.0764934972 |
| H60 | 1.9103483599  | 0.6627437611 | 2.8770738965  |
| H61 | 0.7059822246  | 1.7765821643 | 3.5097420421  |
| H62 | 2.0830769313  | 2.3903737169 | 2.6067287731  |

nuclear repulsion energy..... 1449.225446338 hartrees

-----  
/ end of geometry optimization iteration 9 /  
-----

end of program geopt

start of program onee  
smallest eigenvalue of S: 1.206E-03  
number of canonical orbitals..... 210  
end of program onee

start of program probe  
end of program probe

start of program grid

number of gridpoints:

| atom     | H25 | C1  | C2  | C3  | C4  | C5  | C6  | C7  |
|----------|-----|-----|-----|-----|-----|-----|-----|-----|
| grid # 1 | 73  | 89  | 87  | 90  | 87  | 87  | 84  | 85  |
| grid # 2 | 106 | 100 | 97  | 98  | 98  | 98  | 90  | 92  |
| grid # 3 | 224 | 183 | 182 | 194 | 182 | 182 | 187 | 182 |
| grid # 4 | 224 | 379 | 379 | 406 | 379 | 377 | 372 | 376 |

number of gridpoints:

| atom     | H27 | H28 | H30 | C8  | H32 | C10 | N2  | C9  |
|----------|-----|-----|-----|-----|-----|-----|-----|-----|
| grid # 1 | 73  | 73  | 73  | 85  | 73  | 81  | 100 | 76  |
| grid # 2 | 106 | 106 | 105 | 91  | 106 | 92  | 108 | 80  |
| grid # 3 | 224 | 224 | 220 | 188 | 223 | 175 | 222 | 166 |
| grid # 4 | 224 | 224 | 218 | 375 | 228 | 350 | 401 | 333 |

number of gridpoints:

| atom     | O1  | H43 | C12 | C11 | C18 | H48 | C13 | C14 |
|----------|-----|-----|-----|-----|-----|-----|-----|-----|
| grid # 1 | 111 | 68  | 90  | 82  | 71  | 70  | 88  | 87  |
| grid # 2 | 127 | 99  | 105 | 91  | 75  | 99  | 100 | 100 |
| grid # 3 | 272 | 209 | 191 | 175 | 148 | 217 | 183 | 183 |
| grid # 4 | 472 | 201 | 404 | 354 | 303 | 208 | 380 | 379 |

number of gridpoints:

| atom     | C15 | C16 | C17 | H51 | H52 | H55 | H56 | H59 |
|----------|-----|-----|-----|-----|-----|-----|-----|-----|
| grid # 1 | 88  | 87  | 86  | 73  | 73  | 73  | 73  | 71  |
| grid # 2 | 100 | 100 | 97  | 106 | 104 | 106 | 106 | 101 |
| grid # 3 | 183 | 182 | 181 | 224 | 215 | 224 | 224 | 216 |
| grid # 4 | 378 | 378 | 376 | 224 | 214 | 224 | 224 | 212 |

number of gridpoints:

| atom     | H60 | H61 | H62 | total |
|----------|-----|-----|-----|-------|
| grid # 1 | 71  | 71  | 71  | 2820  |
| grid # 2 | 99  | 99  | 99  | 3486  |
| grid # 3 | 217 | 219 | 220 | 7041  |

grid # 4            217        221        221    10835

end of program grid

start of program rwr

```
recomputing RWR matrix 2        grid: 4
recomputing RWR matrix 14       grid: 4
recomputing RWR matrix 15       grid: 4
end of program rwr
```

start of program scf

|      | i | u | d | i | g |                  |         | RMS     | maximum |
|------|---|---|---|---|---|------------------|---------|---------|---------|
|      | t | p | i | c | r |                  |         |         |         |
|      | e | d | i | u | i |                  | energy  | density | DIIS    |
|      | r | t | s | t | d | total energy     | change  | change  | error   |
| etot | 1 | N | N | 2 | U | -815.13382598772 |         | 3.9E-04 | 1.1E-02 |
| etot | 2 | Y | Y | 6 | M | -815.14141371182 | 7.6E-03 | 1.6E-04 | 4.2E-03 |
| etot | 3 | N | Y | 2 | U | -815.14224728816 | 8.3E-04 | 5.5E-05 | 1.3E-03 |
| etot | 4 | Y | Y | 6 | M | -815.14231557346 | 6.8E-05 | 1.3E-05 | 2.6E-04 |
| etot | 5 | Y | Y | 6 | M | -815.14232201082 | 6.4E-06 | 6.4E-06 | 9.9E-05 |
| etot | 6 | Y | Y | 6 | M | -815.14232373017 | 1.7E-06 | 2.1E-06 | 3.0E-05 |
| etot | 7 | Y | N | 6 | M | -815.14232634200 | 2.6E-06 | 0.0E+00 | 0.0E+00 |

Energy components, in hartrees:

```
(A) Nuclear repulsion..... 1449.22544633805
(E) Total one-electron terms..... -3983.94149407222
(I) Total two-electron terms..... 1719.57372139218
(L) Electronic energy..... -2264.36777268004 (E+I)
(N) Total energy..... -815.14232634200 (A+L)
```

SCFE: SCF energy: HF        -815.14232634200 hartrees    iterations:    7

HOMO energy:        -0.29729

LUMO energy:        0.11770

Orbital energies:

|           |           |           |           |           |           |
|-----------|-----------|-----------|-----------|-----------|-----------|
| -20.45214 | -15.55248 | -11.32187 | -11.23584 | -11.22213 | -11.21341 |
| -11.20722 | -11.20024 | -11.18776 | -11.18577 | -11.18528 | -11.18459 |
| -11.18294 | -11.18273 | -11.17899 | -11.17717 | -11.17658 | -11.17637 |
| -11.17516 | -11.17223 | -1.42167  | -1.33346  | -1.18049  | -1.16285  |
| -1.11579  | -1.08866  | -1.04071  | -1.02751  | -1.02019  | -1.00030  |
| -0.94717  | -0.90594  | -0.85614  | -0.84390  | -0.83054  | -0.81223  |
| -0.79454  | -0.76276  | -0.72100  | -0.68840  | -0.67936  | -0.66959  |
| -0.65869  | -0.64155  | -0.63879  | -0.62735  | -0.61190  | -0.60579  |
| -0.60433  | -0.60045  | -0.59190  | -0.57795  | -0.56008  | -0.55482  |
| -0.54132  | -0.53093  | -0.51713  | -0.50845  | -0.49885  | -0.49708  |
| -0.49057  | -0.48670  | -0.45900  | -0.42163  | -0.39370  | -0.34950  |
| -0.34137  | -0.31578  | -0.29729  | 0.11770   | 0.13378   | 0.14139   |
| 0.14313   | 0.20504   | 0.22732   | 0.26370   | 0.27092   | 0.27271   |
| 0.30241   |           |           |           |           |           |

end of program scf

start of program derla

end of program derla

```

start of program rwr
recomputing RwR matrix 2    grid: 4
recomputing RwR matrix 14   grid: 4
recomputing RwR matrix 15   grid: 4
end of program rwr

```

start of program derlb

forces (hartrees/bohr) : total

| atom  | label | x             | y             | z             |
|-------|-------|---------------|---------------|---------------|
| 1     | H25   | -2.979369E-04 | -2.113366E-04 | 2.735623E-04  |
| 2     | C1    | -1.142355E-03 | -1.498489E-03 | -2.944229E-04 |
| 3     | C2    | 4.651867E-04  | 4.723414E-04  | -6.019093E-04 |
| 4     | C3    | -3.768659E-04 | 2.235530E-04  | 1.608663E-03  |
| 5     | C4    | 9.650878E-05  | -5.712790E-04 | -2.182794E-04 |
| 6     | C5    | -6.242219E-04 | 1.252090E-03  | 1.072153E-03  |
| 7     | C6    | 1.700547E-03  | -5.250049E-05 | -3.978791E-04 |
| 8     | C7    | -1.120400E-03 | -1.039156E-03 | -1.481899E-03 |
| 9     | H27   | 2.143853E-05  | -2.154310E-04 | -1.368257E-04 |
| 10    | H28   | 1.344776E-03  | 3.108309E-04  | -1.180750E-03 |
| 11    | H30   | 9.444400E-04  | 2.303329E-04  | -1.854111E-04 |
| 12    | C8    | 6.170800E-04  | 2.122326E-03  | 1.370800E-03  |
| 13    | H32   | -7.685106E-04 | -4.936087E-04 | -1.158703E-05 |
| 14    | C10   | 1.075559E-03  | -1.184486E-03 | -8.906378E-04 |
| 15    | N2    | -4.415711E-04 | 4.248794E-05  | -7.961249E-04 |
| 16    | C9    | 2.381696E-03  | 2.576540E-03  | -9.419797E-05 |
| 17    | O1    | -3.507416E-03 | -2.961159E-03 | 1.063424E-03  |
| 18    | H43   | 1.866055E-04  | 8.200914E-05  | 7.001821E-04  |
| 19    | C12   | 4.678822E-04  | 4.169909E-04  | -1.979357E-03 |
| 20    | C11   | 1.177165E-03  | 3.010082E-04  | 7.491370E-04  |
| 21    | C18   | -1.963148E-03 | 9.918879E-05  | -1.247189E-03 |
| 22    | H48   | 4.457004E-04  | -5.686639E-04 | -1.835047E-04 |
| 23    | C13   | -4.158363E-04 | 1.565589E-05  | 2.287030E-05  |
| 24    | C14   | 2.887893E-04  | 9.943116E-04  | -2.763107E-03 |
| 25    | C15   | 7.080171E-04  | -7.092194E-04 | 2.057841E-03  |
| 26    | C16   | 1.360907E-04  | 2.650348E-04  | -3.435687E-04 |
| 27    | C17   | 1.434782E-03  | -6.467176E-04 | 1.386156E-03  |
| 28    | H51   | -1.385230E-03 | 2.155138E-04  | 1.385573E-04  |
| 29    | H52   | -4.916570E-04 | 2.779642E-05  | -6.796936E-04 |
| 30    | H55   | 2.437289E-04  | -3.031604E-04 | 1.344353E-03  |
| 31    | H56   | -1.275697E-03 | 8.552673E-05  | 6.017433E-04  |
| 32    | H59   | -1.821410E-04 | -4.691704E-05 | 3.353121E-04  |
| 33    | H60   | 5.269360E-04  | -8.637160E-04 | -3.418541E-04 |
| 34    | H61   | -8.750385E-04 | 3.197463E-04  | 7.034138E-04  |
| 35    | H62   | 1.530671E-03  | 1.425829E-03  | -3.440256E-04 |
| total |       | 9.255736E-04  | 1.132743E-04  | -7.440575E-04 |

end of program derlb

start of program geopt 10

```

geometry optimization step 10
reading input hessian of dimension 105
  in five columns format
reading input hessian of dimension 105

```

in five columns format  
 reading input hessian of dimension 105  
 in five columns format

Hessian eigenvalues:

|              |             |             |             |             |
|--------------|-------------|-------------|-------------|-------------|
| -3.96783E-03 | 0.00000E+00 | 0.00000E+00 | 0.00000E+00 | 0.00000E+00 |
| 0.00000E+00  | 0.00000E+00 | 0.00000E+00 | 0.00000E+00 | 0.00000E+00 |
| 0.00000E+00  | 0.00000E+00 | 0.00000E+00 | 0.00000E+00 | 0.00000E+00 |
| 0.00000E+00  | 0.00000E+00 | 0.00000E+00 | 0.00000E+00 | 0.00000E+00 |
| 0.00000E+00  | 0.00000E+00 | 0.00000E+00 | 0.00000E+00 | 0.00000E+00 |
| 0.00000E+00  | 0.00000E+00 | 2.70395E-03 | 1.67517E-02 | 2.17707E-02 |
| 2.82919E-02  | 2.83973E-02 | 3.00680E-02 | 3.07425E-02 | 3.12100E-02 |
| 3.61534E-02  | 3.79222E-02 | 4.45983E-02 | 4.70562E-02 | 5.94489E-02 |
| 6.62342E-02  | 7.13763E-02 | 7.28004E-02 | 7.51481E-02 | 7.87276E-02 |
| 8.30568E-02  | 1.02777E-01 | 1.10747E-01 | 1.13519E-01 | 1.14939E-01 |
| 1.25147E-01  | 1.27088E-01 | 1.35877E-01 | 1.42955E-01 | 1.53547E-01 |
| 1.56454E-01  | 1.58296E-01 | 1.62818E-01 | 1.67896E-01 | 1.70904E-01 |
| 1.78640E-01  | 1.83921E-01 | 1.85748E-01 | 1.97048E-01 | 2.10071E-01 |
| 2.12860E-01  | 2.15785E-01 | 2.19787E-01 | 2.22406E-01 | 2.24986E-01 |
| 2.30931E-01  | 2.32177E-01 | 2.48101E-01 | 2.53037E-01 | 2.53717E-01 |
| 2.66599E-01  | 2.74147E-01 | 2.77327E-01 | 2.90409E-01 | 2.96632E-01 |
| 2.99225E-01  | 3.06626E-01 | 3.10945E-01 | 3.13813E-01 | 3.19402E-01 |
| 3.22355E-01  | 3.23521E-01 | 3.27977E-01 | 3.31424E-01 | 3.34071E-01 |
| 3.37875E-01  | 3.39703E-01 | 3.43162E-01 | 3.49753E-01 | 3.53760E-01 |
| 3.62134E-01  | 3.66806E-01 | 3.69175E-01 | 3.78263E-01 | 3.80177E-01 |
| 3.82444E-01  | 3.90148E-01 | 3.99086E-01 | 4.09888E-01 | 4.14735E-01 |
| 4.20706E-01  | 4.27214E-01 | 4.33288E-01 | 4.39272E-01 | 4.46790E-01 |
| 4.56737E-01  | 4.80583E-01 | 4.82929E-01 | 4.97147E-01 | 5.00247E-01 |
| 5.47423E-01  | 5.69920E-01 | 5.83972E-01 | 5.99820E-01 | 6.36224E-01 |
| 7.23096E-01  | 7.35473E-01 | 7.99458E-01 | 9.84602E-01 | 1.24031E+00 |

WARNING: Hessian has wrong number of negative eigenvalues

Level shifts adjusted to satisfy step-size constraints

Step size: 0.2123793

Cos(theta): 0.2442891

Final level shift: -1.0282018E-02

energy change: -2.9436E-04 . ( 5.0000E-05 )

gradient maximum: 4.7301E-03 . ( 4.5000E-04 )

gradient rms: 9.9272E-04 . ( 3.0000E-04 )

step size: 0.21237 trust radius: 0.21213

displacement maximum: 8.6917E-02 . ( 1.8000E-03 )

displacement rms: 1.8995E-02 . ( 1.2000E-03 )

predicted energy change: -5.1976E-04 geom step: 2.1237E-01 full step:  
 2.1237E-01

molecular structure not yet converged...

center of mass moved by:

x: 1.9534E-02 y: -1.3748E-02 z: 5.6645E-03

new geometry:

|      | angstroms    |               |               |
|------|--------------|---------------|---------------|
| atom | x            | y             | z             |
| H25  | 0.9705592001 | -3.9322953709 | -2.1809052720 |
| C1   | 1.5193343668 | -3.0104047554 | -2.1470319779 |
| C2   | 2.9804516233 | -0.5899947654 | -2.0829660780 |
| C3   | 1.1643435832 | -1.9998386246 | -1.2603987674 |
| C4   | 2.5883808490 | -2.8027150827 | -2.9914218129 |
| C5   | 3.3128023462 | -1.6066520545 | -2.9576508518 |

|     |               |               |               |
|-----|---------------|---------------|---------------|
| C6  | 1.9044518493  | -0.8092275712 | -1.2512917825 |
| C7  | 0.1172819730  | -1.8658653656 | -0.2439540285 |
| H27 | 2.8713006740  | -3.5703711661 | -3.6846209842 |
| H28 | 4.1388480110  | -1.4758982006 | -3.6221031905 |
| H30 | 3.5120461332  | 0.3368109731  | -2.0306999908 |
| C8  | 0.2509685942  | -0.6486880926 | 0.2953723225  |
| H32 | -0.6215400151 | -2.5959267813 | -0.0059196250 |
| C10 | -0.3800930573 | 0.2583595288  | 1.3276411287  |
| N2  | 1.3341307517  | 0.0059264963  | -0.2911211180 |
| C9  | 1.6204501752  | 1.2431413714  | 0.2270788248  |
| O1  | 2.5361362848  | 1.9509468148  | -0.1155331072 |
| H43 | -0.3645971218 | -0.2195713826 | 2.2978727893  |
| C12 | -1.8128599331 | 0.6194235374  | 0.9729847655  |
| C11 | 0.5835792670  | 1.4996194750  | 1.3330905430  |
| C18 | 1.3230837996  | 1.6862697103  | 2.6751167981  |
| H48 | 0.0362778236  | 2.4035976524  | 1.0943723257  |
| C13 | -3.4348682604 | 1.4250489710  | -0.6138821653 |
| C14 | -4.1290773129 | 0.8391942857  | 1.6034944979  |
| C15 | -4.4386764117 | 1.3039983313  | 0.3383832529  |
| C16 | -2.8194838909 | 0.4991490171  | 1.9176779649  |
| C17 | -2.1328480056 | 1.0835625856  | -0.2987344633 |
| H51 | -5.4482204880 | 1.5638497791  | 0.0916213031  |
| H52 | -2.5872512910 | 0.1359973854  | 2.9001987532  |
| H55 | -3.6690660293 | 1.7768516234  | -1.5990505258 |
| H56 | -4.8986673323 | 0.7356020999  | 2.3429541430  |
| H59 | -1.3627086392 | 1.1618453238  | -1.0422236051 |
| H60 | 1.8470888218  | 0.7750345465  | 2.9556547998  |
| H61 | 0.6189168572  | 1.9380936879  | 3.4636968647  |
| H62 | 2.0433587928  | 2.4887530292  | 2.5806102831  |

nuclear repulsion energy..... 1447.232715971 hartrees

-----  
 / end of geometry optimization iteration 10 /  
 -----

end of program geopt

start of program onee  
 smallest eigenvalue of S: 1.209E-03  
 number of canonical orbitals..... 210  
 end of program onee

start of program probe  
 end of program probe

start of program grid

number of gridpoints:

| atom     | H25 | C1  | C2  | C3  | C4  | C5  | C6  | C7  |
|----------|-----|-----|-----|-----|-----|-----|-----|-----|
| grid # 1 | 73  | 89  | 87  | 90  | 87  | 87  | 85  | 85  |
| grid # 2 | 106 | 99  | 98  | 98  | 98  | 99  | 91  | 92  |
| grid # 3 | 224 | 183 | 183 | 194 | 182 | 182 | 186 | 182 |
| grid # 4 | 224 | 379 | 380 | 408 | 379 | 377 | 370 | 378 |

number of gridpoints:

| atom     | H27 | H28 | H30 | C8  | H32 | C10 | N2  | C9  |
|----------|-----|-----|-----|-----|-----|-----|-----|-----|
| grid # 1 | 73  | 73  | 73  | 86  | 73  | 81  | 100 | 75  |
| grid # 2 | 106 | 106 | 105 | 91  | 106 | 93  | 109 | 80  |
| grid # 3 | 224 | 224 | 220 | 188 | 223 | 175 | 223 | 165 |

|          |     |     |     |     |     |     |     |     |
|----------|-----|-----|-----|-----|-----|-----|-----|-----|
| grid # 4 | 224 | 224 | 218 | 374 | 227 | 347 | 400 | 331 |
|----------|-----|-----|-----|-----|-----|-----|-----|-----|

number of gridpoints:

|          |     |     |     |     |     |     |     |     |
|----------|-----|-----|-----|-----|-----|-----|-----|-----|
| atom     | O1  | H43 | C12 | C11 | C18 | H48 | C13 | C14 |
| grid # 1 | 111 | 68  | 90  | 82  | 72  | 69  | 88  | 87  |
| grid # 2 | 123 | 98  | 105 | 92  | 75  | 99  | 100 | 100 |
| grid # 3 | 272 | 209 | 193 | 175 | 141 | 215 | 183 | 183 |
| grid # 4 | 473 | 200 | 400 | 351 | 309 | 208 | 379 | 379 |

number of gridpoints:

|          |     |     |     |     |     |     |     |     |
|----------|-----|-----|-----|-----|-----|-----|-----|-----|
| atom     | C15 | C16 | C17 | H51 | H52 | H55 | H56 | H59 |
| grid # 1 | 89  | 87  | 86  | 73  | 73  | 73  | 73  | 70  |
| grid # 2 | 100 | 100 | 96  | 106 | 104 | 106 | 106 | 101 |
| grid # 3 | 183 | 182 | 180 | 224 | 214 | 224 | 224 | 215 |
| grid # 4 | 379 | 378 | 376 | 224 | 214 | 224 | 224 | 214 |

number of gridpoints:

|          |     |     |     |       |
|----------|-----|-----|-----|-------|
| atom     | H60 | H61 | H62 | total |
| grid # 1 | 71  | 71  | 71  | 2821  |
| grid # 2 | 99  | 99  | 99  | 3485  |
| grid # 3 | 217 | 220 | 220 | 7032  |
| grid # 4 | 219 | 222 | 221 | 10834 |

end of program grid

start of program rwr

recomputing Rwr matrix 15 grid: 4

end of program rwr

start of program scf

|      | i | u | d | i | g |                  |         | RMS     | maximum |
|------|---|---|---|---|---|------------------|---------|---------|---------|
|      | t | p | i | c | r |                  |         | density | DIIS    |
|      | e | d | i | u | i |                  | energy  | change  | error   |
|      | r | t | s | t | d | total energy     | change  |         |         |
| etot | 1 | N | N | 2 | U | -815.12189927581 |         | 5.6E-04 | 1.7E-02 |
| etot | 2 | Y | Y | 6 | M | -815.13976265107 | 1.8E-02 | 2.6E-04 | 7.1E-03 |
| etot | 3 | N | Y | 2 | U | -815.14206963265 | 2.3E-03 | 9.0E-05 | 2.3E-03 |
| etot | 4 | Y | Y | 6 | M | -815.14226874461 | 2.0E-04 | 2.3E-05 | 5.2E-04 |
| etot | 5 | Y | Y | 6 | M | -815.14227748435 | 8.7E-06 | 1.3E-05 | 2.0E-04 |
| etot | 6 | Y | Y | 6 | M | -815.14228249213 | 5.0E-06 | 4.2E-06 | 6.2E-05 |
| etot | 7 | Y | N | 6 | M | -815.14228511931 | 2.6E-06 | 0.0E+00 | 0.0E+00 |

Energy components, in hartrees:

|     |                               |                   |       |
|-----|-------------------------------|-------------------|-------|
| (A) | Nuclear repulsion.....        | 1447.23271597093  |       |
| (E) | Total one-electron terms..... | -3979.95785912359 |       |
| (I) | Total two-electron terms..... | 1717.58285803335  |       |
| (L) | Electronic energy.....        | -2262.37500109024 | (E+I) |
| (N) | Total energy.....             | -815.14228511931  | (A+L) |

SCFE: SCF energy: HF -815.14228511931 hartrees iterations: 7

HOMO energy: -0.29631

LUMO energy: 0.11802

Orbital energies:

|           |           |           |           |           |           |
|-----------|-----------|-----------|-----------|-----------|-----------|
| -20.45234 | -15.55204 | -11.32149 | -11.23523 | -11.22186 | -11.21348 |
|-----------|-----------|-----------|-----------|-----------|-----------|



```

-11.20764 -11.20055 -11.18758 -11.18626 -11.18578 -11.18531
-11.18377 -11.18337 -11.17892 -11.17765 -11.17645 -11.17629
-11.17515 -11.17221 -1.42490 -1.33389 -1.18017 -1.16260
-1.11522 -1.08849 -1.04063 -1.02695 -1.02075 -0.99972
-0.94647 -0.90568 -0.85543 -0.84362 -0.83099 -0.81202
-0.79420 -0.76210 -0.72073 -0.68932 -0.67923 -0.66926
-0.65839 -0.64131 -0.63978 -0.62700 -0.61224 -0.60604
-0.60415 -0.60094 -0.59154 -0.57651 -0.55978 -0.55440
-0.54084 -0.53100 -0.51696 -0.50792 -0.49955 -0.49658
-0.49090 -0.48634 -0.45944 -0.42162 -0.39349 -0.34914
-0.34215 -0.31600 -0.29631 0.11802 0.13395 0.14004
0.14375 0.20572 0.22626 0.26455 0.27057 0.27306
0.29990

```

end of program scf

start of program derla  
end of program derla

start of program rwr  
recomputing Rwr matrix 15 grid: 4  
end of program rwr

start of program derlb

forces (hartrees/bohr) : total

| atom | label | x             | y             | z             |
|------|-------|---------------|---------------|---------------|
| 1    | H25   | 2.144102E-04  | 1.205084E-03  | 7.618622E-04  |
| 2    | C1    | -3.528374E-03 | -3.442926E-04 | 1.850428E-03  |
| 3    | C2    | 1.393434E-03  | -1.248786E-03 | -2.517157E-03 |
| 4    | C3    | 2.251447E-04  | -8.625454E-04 | 1.473300E-03  |
| 5    | C4    | 2.224675E-03  | 1.218373E-03  | -6.718793E-04 |
| 6    | C5    | -2.783118E-04 | 1.334179E-03  | 8.786158E-04  |
| 7    | C6    | -2.088593E-04 | -4.495554E-04 | 1.961023E-04  |
| 8    | C7    | -3.080521E-03 | -1.675147E-03 | -1.935791E-03 |
| 9    | H27   | 3.735092E-04  | 7.106930E-04  | 1.740925E-04  |
| 10   | H28   | 2.066909E-03  | 1.774400E-04  | -1.736806E-03 |
| 11   | H30   | 7.857578E-04  | -4.883568E-04 | -6.459035E-04 |
| 12   | C8    | 4.173990E-04  | 1.590100E-03  | 2.016753E-03  |
| 13   | H32   | -1.556321E-04 | 3.729482E-05  | -6.487629E-05 |
| 14   | C10   | 1.531558E-03  | -8.274530E-04 | -4.126476E-04 |
| 15   | N2    | -1.776214E-03 | -2.023195E-03 | -5.268804E-04 |
| 16   | C9    | -2.936967E-03 | 1.477451E-04  | 1.582365E-03  |
| 17   | O1    | 3.034302E-03  | 2.323938E-03  | -5.384675E-04 |
| 18   | H43   | 1.686086E-04  | 1.357831E-04  | 3.419925E-04  |
| 19   | C12   | -1.060172E-03 | -1.797572E-04 | 1.898887E-04  |
| 20   | C11   | -2.303676E-04 | 5.176430E-04  | 1.359348E-03  |
| 21   | C18   | -1.388537E-03 | -8.176310E-04 | 3.793457E-04  |
| 22   | H48   | 1.356169E-03  | -1.638542E-03 | -1.806817E-04 |
| 23   | C13   | 7.604959E-04  | -4.741378E-04 | 1.031533E-03  |
| 24   | C14   | 1.309029E-03  | -1.265251E-05 | -7.031787E-04 |
| 25   | C15   | 1.224652E-03  | -4.326605E-04 | 2.761751E-04  |
| 26   | C16   | -8.800887E-04 | 6.762355E-04  | -9.557361E-04 |
| 27   | C17   | -5.060357E-04 | 2.297591E-04  | 1.922741E-04  |
| 28   | H51   | -2.099545E-04 | 1.520753E-04  | -1.180830E-04 |
| 29   | H52   | -1.118498E-04 | -2.744263E-05 | 1.960574E-05  |
| 30   | H55   | -9.357769E-06 | 7.741421E-05  | 2.371021E-04  |

|       |       |               |               |               |
|-------|-------|---------------|---------------|---------------|
| 31    | H56   | 3.313128E-04  | 1.772451E-04  | -1.495537E-04 |
| 32    | H59   | -8.432687E-04 | -7.881803E-05 | 2.112795E-04  |
| 33    | H60   | -1.006530E-03 | 2.419237E-03  | -1.273945E-03 |
| 34    | H61   | 1.317988E-03  | -5.168919E-04 | -1.988380E-03 |
| 35    | H62   | 4.939274E-04  | -2.962030E-04 | 3.995175E-04  |
| ----- |       |               |               |               |
|       | total | 1.018238E-03  | 7.361706E-04  | -8.483854E-04 |

end of program derlb

start of program geopt 11

geometry optimization step 11

reading input hessian of dimension 105

in five columns format

reading input hessian of dimension 105

in five columns format

Hessian eigenvalues:

|              |             |             |             |             |
|--------------|-------------|-------------|-------------|-------------|
| -4.78002E-03 | 0.00000E+00 | 0.00000E+00 | 0.00000E+00 | 0.00000E+00 |
| 0.00000E+00  | 0.00000E+00 | 0.00000E+00 | 0.00000E+00 | 0.00000E+00 |
| 0.00000E+00  | 0.00000E+00 | 0.00000E+00 | 0.00000E+00 | 0.00000E+00 |
| 0.00000E+00  | 0.00000E+00 | 0.00000E+00 | 0.00000E+00 | 0.00000E+00 |
| 0.00000E+00  | 0.00000E+00 | 0.00000E+00 | 0.00000E+00 | 0.00000E+00 |
| 0.00000E+00  | 0.00000E+00 | 2.52510E-03 | 1.68708E-02 | 1.98993E-02 |
| 2.32295E-02  | 2.81629E-02 | 2.97624E-02 | 3.03768E-02 | 3.09414E-02 |
| 3.15532E-02  | 3.73316E-02 | 3.77454E-02 | 4.43859E-02 | 4.47598E-02 |
| 6.09956E-02  | 6.65899E-02 | 7.08101E-02 | 7.16592E-02 | 7.36847E-02 |
| 8.23790E-02  | 9.02316E-02 | 1.06626E-01 | 1.12174E-01 | 1.15315E-01 |
| 1.23087E-01  | 1.29414E-01 | 1.34017E-01 | 1.40555E-01 | 1.45694E-01 |
| 1.49292E-01  | 1.51200E-01 | 1.56004E-01 | 1.63404E-01 | 1.72225E-01 |
| 1.76187E-01  | 1.80774E-01 | 1.81700E-01 | 1.86372E-01 | 1.96361E-01 |
| 1.98752E-01  | 2.09752E-01 | 2.13691E-01 | 2.16561E-01 | 2.21328E-01 |
| 2.27396E-01  | 2.29089E-01 | 2.39348E-01 | 2.47251E-01 | 2.49668E-01 |
| 2.52253E-01  | 2.62048E-01 | 2.63433E-01 | 2.81784E-01 | 2.83875E-01 |
| 2.97440E-01  | 2.99402E-01 | 3.04905E-01 | 3.12713E-01 | 3.14779E-01 |
| 3.21797E-01  | 3.24537E-01 | 3.29579E-01 | 3.30925E-01 | 3.34830E-01 |
| 3.40009E-01  | 3.40502E-01 | 3.45284E-01 | 3.48624E-01 | 3.59369E-01 |
| 3.61214E-01  | 3.66596E-01 | 3.72744E-01 | 3.81138E-01 | 3.83647E-01 |
| 3.87472E-01  | 3.95542E-01 | 4.01276E-01 | 4.05138E-01 | 4.20077E-01 |
| 4.22811E-01  | 4.29389E-01 | 4.39644E-01 | 4.48683E-01 | 4.56045E-01 |
| 4.67856E-01  | 4.75835E-01 | 4.87364E-01 | 4.99252E-01 | 5.14924E-01 |
| 5.28923E-01  | 5.64094E-01 | 6.01734E-01 | 6.10715E-01 | 6.64414E-01 |
| 7.16860E-01  | 7.49634E-01 | 8.22700E-01 | 1.03181E+00 | 1.36247E+00 |

WARNING: Hessian has wrong number of negative eigenvalues

Level shifts adjusted to satisfy step-size constraints

Step size: 0.1061566

Cos(theta): 0.6185673

Final level shift: -4.8991655E-02

|                       |            |               |                |
|-----------------------|------------|---------------|----------------|
| energy change:        | 4.1223E-05 | *             | ( 5.0000E-05 ) |
| gradient maximum:     | 4.1685E-03 | .             | ( 4.5000E-04 ) |
| gradient rms:         | 1.1798E-03 | .             | ( 3.0000E-04 ) |
| step size:            | 0.10615    | trust radius: | 0.10607        |
| displacement maximum: | 3.2417E-02 | .             | ( 1.8000E-03 ) |
| displacement rms:     | 9.4947E-03 | .             | ( 1.2000E-03 ) |

predicted energy change: -7.0909E-04 geom step: 1.0615E-01 full step:  
 1.0615E-01  
 molecular structure not yet converged...

center of mass moved by:  
 x: 3.3318E-04 y: 5.7594E-04 z: -2.1807E-03

new geometry:

|      | angstroms     |               |               |
|------|---------------|---------------|---------------|
| atom | x             | y             | z             |
| H25  | 0.9350673315  | -3.9078266325 | -2.2289740236 |
| C1   | 1.5075047820  | -3.0009932433 | -2.1756346448 |
| C2   | 3.0431614539  | -0.6147978193 | -2.0482258413 |
| C3   | 1.1534365049  | -1.9897145691 | -1.2912350378 |
| C4   | 2.6186480562  | -2.8080883728 | -2.9820528530 |
| C5   | 3.3812324117  | -1.6303086254 | -2.9160819741 |
| C6   | 1.9256209142  | -0.8159857738 | -1.2537495466 |
| C7   | 0.0782973067  | -1.8458130674 | -0.3050905515 |
| H27  | 2.9097064251  | -3.5750567377 | -3.6723519341 |
| H28  | 4.2437337784  | -1.5166721395 | -3.5524914701 |
| H30  | 3.6093958229  | 0.2929708214  | -1.9698567655 |
| C8   | 0.2385099650  | -0.6399430346 | 0.2619826996  |
| H32  | -0.6866910667 | -2.5608615839 | -0.0988539199 |
| C10  | -0.3851602041 | 0.2548807499  | 1.3067223253  |
| N2   | 1.3332303805  | 0.0056989668  | -0.3082330222 |
| C9   | 1.6186897862  | 1.2421136552  | 0.2191078059  |
| O1   | 2.5439224526  | 1.9414991874  | -0.1072820720 |
| H43  | -0.3711477533 | -0.2375494630 | 2.2711625243  |
| C12  | -1.8211573223 | 0.6261525687  | 0.9699790563  |
| C11  | 0.5806935310  | 1.4956436814  | 1.3182504534  |
| C18  | 1.3136022095  | 1.6992460227  | 2.6521043954  |
| H48  | 0.0345551363  | 2.3928290930  | 1.0770261748  |
| C13  | -3.4822296144 | 1.4183264428  | -0.5809148285 |
| C14  | -4.1209395142 | 0.8500914341  | 1.6453800915  |
| C15  | -4.4625660491 | 1.3039199268  | 0.3884341571  |
| C16  | -2.8062954378 | 0.5122777669  | 1.9323456340  |
| C17  | -2.1728128901 | 1.0815009458  | -0.2925357908 |
| H51  | -5.4793015792 | 1.5589844742  | 0.1608877483  |
| H52  | -2.5558908890 | 0.1484767944  | 2.9116831787  |
| H55  | -3.7405056601 | 1.7600994146  | -1.5627577951 |
| H56  | -4.8724572018 | 0.7484118356  | 2.4027006234  |
| H59  | -1.4282772932 | 1.1498844369  | -1.0563893348 |
| H60  | 1.8383647638  | 0.7969638036  | 2.9370290356  |
| H61  | 0.6059576189  | 1.9543219941  | 3.4285869141  |
| H62  | 2.0397646853  | 2.5022772647  | 2.5580291374  |

nuclear repulsion energy..... 1445.954963252 hartrees

-----  
 / end of geometry optimization iteration 11 /  
 -----

end of program geopt

start of program onee  
 smallest eigenvalue of S: 1.240E-03  
 number of canonical orbitals..... 210  
 end of program onee

start of program probe  
 end of program probe

start of program grid

number of gridpoints:

|          |     |     |     |     |     |     |     |     |
|----------|-----|-----|-----|-----|-----|-----|-----|-----|
| atom     | H25 | C1  | C2  | C3  | C4  | C5  | C6  | C7  |
| grid # 1 | 73  | 89  | 88  | 90  | 87  | 87  | 85  | 85  |
| grid # 2 | 106 | 100 | 98  | 98  | 98  | 99  | 91  | 92  |
| grid # 3 | 224 | 183 | 183 | 195 | 182 | 182 | 188 | 183 |
| grid # 4 | 224 | 380 | 383 | 404 | 379 | 379 | 374 | 379 |

number of gridpoints:

|          |     |     |     |     |     |     |     |     |
|----------|-----|-----|-----|-----|-----|-----|-----|-----|
| atom     | H27 | H28 | H30 | C8  | H32 | C10 | N2  | C9  |
| grid # 1 | 73  | 73  | 73  | 86  | 73  | 81  | 100 | 76  |
| grid # 2 | 106 | 106 | 105 | 91  | 106 | 92  | 109 | 81  |
| grid # 3 | 224 | 224 | 220 | 190 | 223 | 175 | 223 | 164 |
| grid # 4 | 224 | 224 | 219 | 372 | 228 | 351 | 401 | 327 |

number of gridpoints:

|          |     |     |     |     |     |     |     |     |
|----------|-----|-----|-----|-----|-----|-----|-----|-----|
| atom     | O1  | H43 | C12 | C11 | C18 | H48 | C13 | C14 |
| grid # 1 | 111 | 68  | 90  | 81  | 71  | 69  | 87  | 87  |
| grid # 2 | 123 | 98  | 105 | 93  | 76  | 100 | 100 | 98  |
| grid # 3 | 272 | 209 | 191 | 171 | 150 | 216 | 183 | 183 |
| grid # 4 | 474 | 202 | 400 | 352 | 305 | 205 | 380 | 378 |

number of gridpoints:

|          |     |     |     |     |     |     |     |     |
|----------|-----|-----|-----|-----|-----|-----|-----|-----|
| atom     | C15 | C16 | C17 | H51 | H52 | H55 | H56 | H59 |
| grid # 1 | 89  | 87  | 85  | 73  | 73  | 73  | 73  | 71  |
| grid # 2 | 100 | 99  | 98  | 106 | 104 | 106 | 106 | 101 |
| grid # 3 | 182 | 180 | 181 | 224 | 214 | 224 | 224 | 215 |
| grid # 4 | 380 | 377 | 375 | 224 | 214 | 224 | 224 | 215 |

number of gridpoints:

|          |     |     |     |       |
|----------|-----|-----|-----|-------|
| atom     | H60 | H61 | H62 | total |
| grid # 1 | 71  | 71  | 71  | 2820  |
| grid # 2 | 99  | 99  | 99  | 3488  |
| grid # 3 | 217 | 220 | 220 | 7039  |
| grid # 4 | 218 | 222 | 221 | 10838 |

end of program grid

start of program rwr

recomputing RwR matrix 15 grid: 4  
end of program rwr

start of program scf

|      | i | u | d | i | g |                  |         | RMS     | maximum |
|------|---|---|---|---|---|------------------|---------|---------|---------|
|      | t | p | i | c | r |                  |         |         |         |
|      | e | d | i | u | i |                  | energy  | density | DIIS    |
|      | r | t | s | t | d | total energy     | change  | change  | error   |
| etot | 1 | N | N | 1 | U | -815.13511620078 |         | 3.7E-04 | 1.3E-02 |
| etot | 2 | Y | Y | 4 | M | -815.14109616859 | 6.0E-03 | 1.5E-04 | 5.2E-03 |
| etot | 3 | N | Y | 1 | U | -815.14179411455 | 7.0E-04 | 5.3E-05 | 1.6E-03 |
| etot | 4 | Y | Y | 4 | M | -815.14186107932 | 6.7E-05 | 1.8E-05 | 5.1E-04 |
| etot | 5 | Y | Y | 4 | M | -815.14186679143 | 5.7E-06 | 6.8E-06 | 1.4E-04 |
| etot | 6 | Y | Y | 4 | M | -815.14186734030 | 5.5E-07 | 2.9E-06 | 4.0E-05 |
| etot | 7 | Y | N | 4 | M | -815.14186819667 | 8.6E-07 | 0.0E+00 | 0.0E+00 |

Energy components, in hartrees:

```
(A) Nuclear repulsion..... 1445.95496325192
(E) Total one-electron terms..... -3977.40453177892
(I) Total two-electron terms..... 1716.30770033034
(L) Electronic energy..... -2261.09683144859 (E+I)
(N) Total energy..... -815.14186819667 (A+L)
```

SCFE: SCF energy: HF -815.14186819667 hartrees iterations: 7

HOMO energy: -0.29645

LUMO energy: 0.11861

Orbital energies:

```
-20.45269 -15.55215 -11.32105 -11.23561 -11.22340 -11.21383
-11.20610 -11.19987 -11.18789 -11.18543 -11.18486 -11.18437
-11.18282 -11.18249 -11.17985 -11.17781 -11.17669 -11.17662
-11.17592 -11.17356 -1.42634 -1.33322 -1.18119 -1.16177
-1.11549 -1.08733 -1.04232 -1.02717 -1.01880 -1.00061
-0.94647 -0.90555 -0.85508 -0.84446 -0.83080 -0.80972
-0.79418 -0.76178 -0.72123 -0.69085 -0.67860 -0.66845
-0.65854 -0.64086 -0.63999 -0.62645 -0.61150 -0.60693
-0.60357 -0.60049 -0.59215 -0.57746 -0.55942 -0.55527
-0.54130 -0.53112 -0.51642 -0.50838 -0.49938 -0.49609
-0.49121 -0.48635 -0.45907 -0.42211 -0.39314 -0.34910
-0.34351 -0.31390 -0.29645 0.11861 0.13467 0.13957
0.14364 0.20522 0.22560 0.26444 0.27093 0.27290
0.30060
```

end of program scf

start of program derla

end of program derla

start of program rwr

recomputing RwR matrix 15 grid: 4

end of program rwr

start of program derlb

forces (hartrees/bohr) : total

| atom | label | x             | y             | z             |
|------|-------|---------------|---------------|---------------|
| 1    | H25   | 1.287006E-03  | 1.169534E-03  | -4.934181E-04 |
| 2    | C1    | 4.982090E-03  | 2.097602E-03  | -2.375867E-03 |
| 3    | C2    | -2.498465E-03 | 7.570800E-04  | 2.917767E-03  |
| 4    | C3    | 1.024460E-03  | 7.778499E-04  | -3.948986E-04 |
| 5    | C4    | -2.958431E-04 | 7.023582E-04  | 9.626116E-04  |
| 6    | C5    | 3.222860E-06  | -3.884697E-03 | -2.449964E-03 |
| 7    | C6    | -1.295333E-03 | 1.314017E-03  | -1.352881E-03 |
| 8    | C7    | 1.043197E-03  | 2.515804E-03  | 2.950928E-04  |
| 9    | H27   | -1.444873E-04 | 3.919244E-05  | 2.156971E-04  |
| 10   | H28   | -4.036505E-03 | -1.412069E-03 | 2.471712E-03  |
| 11   | H30   | -2.381193E-03 | -1.560881E-03 | 2.902841E-05  |
| 12   | C8    | -3.743770E-03 | -1.834222E-03 | -2.699784E-03 |
| 13   | H32   | 1.330956E-03  | 7.780944E-04  | 2.312532E-04  |
| 14   | C10   | 7.308707E-04  | 7.940108E-04  | -7.274642E-04 |

|       |       |               |               |               |
|-------|-------|---------------|---------------|---------------|
| 15    | N2    | 2.636299E-03  | -2.325157E-03 | 1.849266E-03  |
| 16    | C9    | -2.391351E-03 | -4.793206E-03 | 1.662832E-03  |
| 17    | O1    | 5.711572E-03  | 4.753976E-03  | -1.638427E-03 |
| 18    | H43   | 1.278466E-03  | 7.906435E-04  | -2.935122E-04 |
| 19    | C12   | 1.137079E-03  | -1.605896E-03 | 1.068971E-03  |
| 20    | C11   | -1.195006E-03 | -2.033543E-04 | -1.272718E-03 |
| 21    | C18   | 2.282753E-03  | 1.593426E-03  | 2.648320E-04  |
| 22    | H48   | -1.177564E-03 | 1.785104E-03  | -1.769165E-03 |
| 23    | C13   | 2.740815E-03  | 3.200306E-04  | -2.388940E-03 |
| 24    | C14   | -2.911957E-04 | -1.192819E-03 | 3.248866E-03  |
| 25    | C15   | -2.306720E-03 | 4.751624E-04  | 3.228107E-04  |
| 26    | C16   | -2.707736E-03 | -5.302930E-04 | 3.490894E-03  |
| 27    | C17   | -1.274693E-03 | 4.353794E-04  | -1.815591E-03 |
| 28    | H51   | 7.707843E-04  | -9.740377E-05 | 3.492333E-04  |
| 29    | H52   | -3.493259E-04 | 6.169750E-04  | -7.296322E-04 |
| 30    | H55   | 5.096521E-04  | 2.799782E-04  | -5.684600E-04 |
| 31    | H56   | 3.389988E-05  | 1.111685E-04  | 3.299452E-04  |
| 32    | H59   | 1.987920E-03  | 4.147087E-04  | -1.884503E-03 |
| 33    | H60   | 7.088841E-04  | -1.229240E-03 | 9.248530E-04  |
| 34    | H61   | -3.960131E-04 | 3.790184E-04  | 1.723255E-03  |
| 35    | H62   | -2.372659E-03 | -1.876090E-03 | -2.797159E-04 |
| ----- |       |               |               |               |
|       | total | 1.342069E-03  | 3.557834E-04  | -7.760215E-04 |

end of program derlb

start of program geopt 12

geometry optimization step 12

reading input hessian of dimension 105

in five columns format

reading input hessian of dimension 105

in five columns format

\*\* restarting optimization from step 11 \*\*

Hessian eigenvalues:

|              |             |             |             |             |
|--------------|-------------|-------------|-------------|-------------|
| -1.20277E-01 | 0.00000E+00 | 0.00000E+00 | 0.00000E+00 | 0.00000E+00 |
| 0.00000E+00  | 0.00000E+00 | 0.00000E+00 | 0.00000E+00 | 0.00000E+00 |
| 0.00000E+00  | 0.00000E+00 | 0.00000E+00 | 0.00000E+00 | 0.00000E+00 |
| 0.00000E+00  | 0.00000E+00 | 0.00000E+00 | 0.00000E+00 | 0.00000E+00 |
| 0.00000E+00  | 0.00000E+00 | 0.00000E+00 | 0.00000E+00 | 0.00000E+00 |
| 0.00000E+00  | 0.00000E+00 | 2.30049E-03 | 6.46729E-03 | 2.13182E-02 |
| 2.19821E-02  | 2.81735E-02 | 3.02288E-02 | 3.07258E-02 | 3.08945E-02 |
| 3.16739E-02  | 3.70653E-02 | 3.83479E-02 | 4.46544E-02 | 4.92337E-02 |
| 5.68994E-02  | 6.45936E-02 | 6.72933E-02 | 7.26298E-02 | 7.33660E-02 |
| 7.99358E-02  | 8.22371E-02 | 9.09971E-02 | 1.04407E-01 | 1.11888E-01 |
| 1.12558E-01  | 1.22101E-01 | 1.31926E-01 | 1.40071E-01 | 1.42155E-01 |
| 1.46233E-01  | 1.50373E-01 | 1.53689E-01 | 1.55621E-01 | 1.60397E-01 |
| 1.73847E-01  | 1.79098E-01 | 1.81871E-01 | 1.84617E-01 | 1.88481E-01 |
| 1.97911E-01  | 2.00665E-01 | 2.08140E-01 | 2.12802E-01 | 2.16731E-01 |
| 2.18923E-01  | 2.31322E-01 | 2.32532E-01 | 2.44599E-01 | 2.49001E-01 |
| 2.56293E-01  | 2.60377E-01 | 2.62299E-01 | 2.66239E-01 | 2.79760E-01 |
| 2.83643E-01  | 2.91588E-01 | 2.98586E-01 | 3.05677E-01 | 3.11708E-01 |
| 3.15283E-01  | 3.20066E-01 | 3.25015E-01 | 3.31259E-01 | 3.33186E-01 |
| 3.34189E-01  | 3.36228E-01 | 3.38734E-01 | 3.47969E-01 | 3.58054E-01 |
| 3.62440E-01  | 3.68459E-01 | 3.75294E-01 | 3.77863E-01 | 3.89220E-01 |
| 3.92363E-01  | 4.01662E-01 | 4.06751E-01 | 4.12260E-01 | 4.22308E-01 |
| 4.26232E-01  | 4.36783E-01 | 4.54613E-01 | 4.60872E-01 | 4.66859E-01 |
| 4.71745E-01  | 4.91055E-01 | 5.03734E-01 | 5.08794E-01 | 5.14482E-01 |
| 5.24585E-01  | 5.63490E-01 | 5.82795E-01 | 6.17863E-01 | 6.80942E-01 |
| 7.11914E-01  | 7.35067E-01 | 8.22024E-01 | 1.06549E+00 | 1.33348E+00 |

WARNING: Hessian has wrong number of negative eigenvalues

Level shifts adjusted to satisfy step-size constraints

Step size: 0.0539062

Cos(theta): 0.5974702

Final level shift: -1.7661307E-01

energy change: 4.1692E-04 . ( 5.0000E-05 )

gradient maximum: 4.1685E-03 . ( 4.5000E-04 )

gradient rms: 1.1798E-03 . ( 3.0000E-04 )

step size: 0.05391 trust radius: 0.05303

displacement maximum: 1.8827E-02 . ( 1.8000E-03 )

displacement rms: 4.8215E-03 . ( 1.2000E-03 )

predicted energy change: -4.6902E-04 geom step: 5.3906E-02 full step:  
5.3906E-02

molecular structure not yet converged...

center of mass moved by:

x: -1.6653E-16 y: 6.7654E-17 z: -5.5511E-17

new geometry:

|      | angstroms     |               |               |
|------|---------------|---------------|---------------|
| atom | x             | y             | z             |
| H25  | 0.9771529403  | -3.9291962865 | -2.1761041238 |
| C1   | 1.5252186106  | -3.0098785058 | -2.1410383377 |
| C2   | 2.9911669335  | -0.5964973151 | -2.0841128923 |
| C3   | 1.1578846408  | -1.9969396451 | -1.2705582265 |
| C4   | 2.6106606158  | -2.8038946234 | -2.9737313692 |
| C5   | 3.3385000696  | -1.6140921013 | -2.9447638486 |
| C6   | 1.8997578672  | -0.8098905310 | -1.2637516546 |
| C7   | 0.1019824108  | -1.8579171945 | -0.2641846338 |
| H27  | 2.9081267727  | -3.5752894123 | -3.6583312498 |
| H28  | 4.1788698916  | -1.4903279841 | -3.5978736927 |
| H30  | 3.5223938864  | 0.3294601910  | -2.0318062568 |
| C8   | 0.2411792534  | -0.6424488685 | 0.2802221285  |
| H32  | -0.6363960026 | -2.5859567622 | -0.0225341537 |
| C10  | -0.3849203517 | 0.2625189530  | 1.3138637665  |
| N2   | 1.3239710006  | 0.0087522134  | -0.3093139257 |
| C9   | 1.6167867343  | 1.2441715951  | 0.2117297241  |
| O1   | 2.5570892964  | 1.9387197261  | -0.1088568271 |
| H43  | -0.3691621114 | -0.2229466121 | 2.2807762570  |
| C12  | -1.8191168699 | 0.6219572683  | 0.9671953027  |
| C11  | 0.5797115978  | 1.5016733976  | 1.3176650440  |
| C18  | 1.3157981603  | 1.6765428729  | 2.6613535177  |
| H48  | 0.0400160640  | 2.4123995049  | 1.0746856579  |
| C13  | -3.4504836170 | 1.4345815485  | -0.5962620203 |
| C14  | -4.1275203727 | 0.8364306687  | 1.6170220404  |
| C15  | -4.4447803250 | 1.3083086739  | 0.3625082863  |
| C16  | -2.8173791607 | 0.4956972754  | 1.9181657639  |
| C17  | -2.1482637861 | 1.0918644094  | -0.2964082841 |
| H51  | -5.4562583777 | 1.5722799864  | 0.1253494707  |
| H52  | -2.5757572976 | 0.1350236371  | 2.9016902668  |
| H55  | -3.6954677824 | 1.7937398601  | -1.5765453393 |
| H56  | -4.8900296317 | 0.7342465417  | 2.3613469313  |
| H59  | -1.3851637463 | 1.1769950215  | -1.0441231342 |
| H60  | 1.8436440783  | 0.7675305911  | 2.9331544845  |
| H61  | 0.6175967480  | 1.9124617954  | 3.4569807131  |
| H62  | 2.0270258039  | 2.4835471399  | 2.5749027876  |

```

nuclear repulsion energy..... 1447.577731398 hartrees
-----
/  end of geometry optimization iteration 12  /
-----

end of program geopt

start of program onee
smallest eigenvalue of S:    1.202E-03
number of canonical orbitals.....      210
end of program onee

start of program probe
end of program probe

start of program grid

number of gridpoints:
  atom      H25      C1      C2      C3      C4      C5      C6      C7
grid # 1      73      89      87      90      87      87      84      85
grid # 2     106     100      97      98      98      99      91      92
grid # 3     224     182     182     194     182     182     187     183
grid # 4     224     380     379     404     379     378     370     377

number of gridpoints:
  atom      H27      H28      H30      C8      H32      C10      N2      C9
grid # 1      73      73      73      86      73      81     100      76
grid # 2     106     106     105      91     106      92     109      80
grid # 3     224     224     220     188     223     175     223     165
grid # 4     224     224     218     374     227     349     402     332

number of gridpoints:
  atom      O1      H43      C12      C11      C18      H48      C13      C14
grid # 1     111      68      90      82      72      69      87      87
grid # 2     127      98     106      94      74     100     100      98
grid # 3     272     209     193     176     141     216     183     183
grid # 4     473     199     398     352     307     208     379     379

number of gridpoints:
  atom      C15      C16      C17      H51      H52      H55      H56      H59
grid # 1      87      87      86      73      73      73      73      70
grid # 2      99     100      96     106     104     106     106     101
grid # 3     183     182     180     224     214     224     224     215
grid # 4     379     377     376     224     214     224     224     214

number of gridpoints:
  atom      H60      H61      H62  total
grid # 1      71      71      71   2818
grid # 2      99      99      99   3488
grid # 3     216     220     220   7033
grid # 4     218     222     221  10829

end of program grid

start of program rwr
recomputing RwR matrix 14    grid: 4
recomputing RwR matrix 15    grid: 4
end of program rwr

```



start of program scf

|      | i | u | d | i | g |                  |          | RMS     | maximum |
|------|---|---|---|---|---|------------------|----------|---------|---------|
|      | t | p | i | c | r |                  |          | density | DIIS    |
|      | e | d | i | u | i |                  | energy   | change  | error   |
|      | r | t | s | t | d | total energy     | change   |         |         |
| etot | 1 | N | N | 1 | U | -815.13716243958 |          | 3.2E-04 | 1.2E-02 |
| etot | 2 | Y | Y | 4 | M | -815.14139067976 | 4.2E-03  | 1.3E-04 | 4.8E-03 |
| etot | 3 | Y | Y | 4 | M | -815.14190974434 | 5.2E-04  | 4.5E-05 | 1.5E-03 |
| etot | 4 | N | Y | 1 | U | -815.14195024401 | 4.0E-05  | 2.1E-05 | 4.8E-04 |
| etot | 5 | Y | Y | 4 | M | -815.14195632242 | 6.1E-06  | 7.9E-06 | 1.3E-04 |
| etot | 6 | Y | Y | 4 | M | -815.14195799197 | 1.7E-06  | 3.1E-06 | 3.6E-05 |
| etot | 7 | Y | N | 4 | M | -815.14195691538 | -1.1E-06 | 0.0E+00 | 0.0E+00 |

Energy components, in hartrees:

|     |                               |                   |       |
|-----|-------------------------------|-------------------|-------|
| (A) | Nuclear repulsion.....        | 1447.57773139812  |       |
| (E) | Total one-electron terms..... | -3980.63883502023 |       |
| (I) | Total two-electron terms..... | 1717.91914670673  |       |
| (L) | Electronic energy.....        | -2262.71968831350 | (E+I) |
| (N) | Total energy.....             | -815.14195691538  | (A+L) |

SCFE: SCF energy: HF      -815.14195691538 hartrees      iterations:      7

HOMO energy:      -0.29717

LUMO energy:      0.11831

Orbital energies:

|           |           |           |           |           |           |
|-----------|-----------|-----------|-----------|-----------|-----------|
| -20.45214 | -15.55250 | -11.32196 | -11.23551 | -11.22193 | -11.21339 |
| -11.20825 | -11.20005 | -11.18702 | -11.18585 | -11.18477 | -11.18466 |
| -11.18309 | -11.18243 | -11.17862 | -11.17646 | -11.17630 | -11.17615 |
| -11.17470 | -11.17215 | -1.42153  | -1.33362  | -1.18169  | -1.16360  |
| -1.11601  | -1.08886  | -1.04150  | -1.02802  | -1.01954  | -1.00139  |
| -0.94726  | -0.90605  | -0.85597  | -0.84433  | -0.83146  | -0.81126  |
| -0.79450  | -0.76258  | -0.72153  | -0.68895  | -0.67880  | -0.66958  |
| -0.65809  | -0.64095  | -0.64042  | -0.62717  | -0.61156  | -0.60612  |
| -0.60405  | -0.60170  | -0.59195  | -0.57721  | -0.56002  | -0.55478  |
| -0.54061  | -0.53085  | -0.51648  | -0.50835  | -0.49998  | -0.49717  |
| -0.49116  | -0.48640  | -0.45908  | -0.42181  | -0.39348  | -0.34975  |
| -0.34297  | -0.31500  | -0.29717  | 0.11831   | 0.13476   | 0.13950   |
| 0.14386   | 0.20576   | 0.22596   | 0.26446   | 0.27089   | 0.27319   |
| 0.29902   |           |           |           |           |           |

end of program scf

start of program der1a

end of program der1a

start of program rwr

recomputing RwR matrix    14      grid:    4

recomputing RwR matrix    15      grid:    4

end of program rwr

start of program der1b

forces (hartrees/bohr) : total

| atom  | label | x             | y             | z             |
|-------|-------|---------------|---------------|---------------|
| 1     | H25   | -8.793163E-05 | -7.284415E-04 | 1.534319E-04  |
| 2     | C1    | 1.747961E-03  | -6.803971E-04 | -3.966347E-03 |
| 3     | C2    | -2.067343E-03 | 2.433051E-03  | 1.947151E-03  |
| 4     | C3    | -7.890831E-04 | 6.051085E-04  | 2.509989E-03  |
| 5     | C4    | -4.938475E-04 | -4.985741E-03 | -1.362581E-03 |
| 6     | C5    | 5.793989E-04  | 7.104740E-04  | -1.054380E-04 |
| 7     | C6    | 3.145290E-03  | 2.044709E-03  | -4.853383E-04 |
| 8     | C7    | -1.488022E-03 | -5.328551E-04 | 3.300460E-04  |
| 9     | H27   | -8.386920E-04 | 3.191751E-04  | 9.685245E-04  |
| 10    | H28   | -2.225737E-04 | -2.864975E-04 | -2.532800E-04 |
| 11    | H30   | 7.809458E-04  | 3.425289E-04  | 2.908721E-04  |
| 12    | C8    | -2.603187E-04 | -8.865512E-05 | -1.987860E-03 |
| 13    | H32   | -6.127370E-04 | -6.092375E-04 | -3.584395E-04 |
| 14    | C10   | 5.651113E-04  | -1.163365E-03 | -9.741275E-04 |
| 15    | N2    | -2.312682E-05 | 1.306153E-03  | -3.344962E-04 |
| 16    | C9    | 6.164547E-03  | 1.128648E-03  | 3.196440E-03  |
| 17    | O1    | -4.991206E-03 | -1.836981E-03 | 3.221816E-04  |
| 18    | H43   | 7.817195E-04  | 1.050869E-03  | 4.930786E-04  |
| 19    | C12   | 7.356808E-05  | -9.513266E-04 | 2.679000E-03  |
| 20    | C11   | -1.630663E-03 | 2.377751E-03  | 6.442379E-04  |
| 21    | C18   | -1.100031E-03 | -4.006181E-04 | -1.728066E-04 |
| 22    | H48   | 1.191621E-03  | -3.495483E-03 | 1.274216E-03  |
| 23    | C13   | -7.352532E-04 | 6.926293E-04  | -1.914636E-03 |
| 24    | C14   | 1.291275E-03  | -4.520763E-04 | 2.542060E-03  |
| 25    | C15   | -2.196224E-03 | 1.043310E-03  | -3.250652E-03 |
| 26    | C16   | 7.451240E-04  | 4.279297E-05  | 2.409415E-03  |
| 27    | C17   | 4.349237E-04  | 6.441672E-04  | -1.093577E-03 |
| 28    | H51   | 1.867769E-04  | 4.062917E-05  | -1.077784E-04 |
| 29    | H52   | -4.147278E-04 | 1.698793E-05  | -1.604662E-03 |
| 30    | H55   | 2.565444E-04  | -2.954245E-06 | 3.699215E-04  |
| 31    | H56   | -5.434186E-04 | -3.047336E-04 | 9.616781E-04  |
| 32    | H59   | 2.335698E-05  | -1.040448E-04 | -6.909369E-04 |
| 33    | H60   | 1.544427E-04  | 1.067695E-03  | -1.552558E-03 |
| 34    | H61   | -7.385815E-04 | 2.757002E-04  | -1.684118E-03 |
| 35    | H62   | 2.602469E-03  | 1.146247E-03  | 5.298051E-04  |
| total |       | 1.491294E-03  | 6.652188E-04  | -2.775832E-04 |

end of program derlb

start of program geopt 13

geometry optimization step 13

reading input hessian of dimension 105  
in five columns format

reading input hessian of dimension 105  
in five columns format

\*\* restarting optimization from step 11 \*\*

Hessian eigenvalues:

|              |             |             |             |             |
|--------------|-------------|-------------|-------------|-------------|
| -2.90898E-03 | 0.00000E+00 | 0.00000E+00 | 0.00000E+00 | 0.00000E+00 |
| 0.00000E+00  | 0.00000E+00 | 0.00000E+00 | 0.00000E+00 | 0.00000E+00 |
| 0.00000E+00  | 0.00000E+00 | 0.00000E+00 | 0.00000E+00 | 0.00000E+00 |
| 0.00000E+00  | 0.00000E+00 | 0.00000E+00 | 0.00000E+00 | 0.00000E+00 |
| 0.00000E+00  | 0.00000E+00 | 0.00000E+00 | 0.00000E+00 | 0.00000E+00 |
| 0.00000E+00  | 0.00000E+00 | 1.61667E-03 | 1.88858E-02 | 2.02850E-02 |
| 2.79562E-02  | 2.85503E-02 | 3.00689E-02 | 3.05410E-02 | 3.09044E-02 |

|             |             |             |             |             |
|-------------|-------------|-------------|-------------|-------------|
| 3.42799E-02 | 3.72812E-02 | 4.16096E-02 | 4.56745E-02 | 5.68035E-02 |
| 5.91995E-02 | 6.97156E-02 | 7.16291E-02 | 7.40225E-02 | 7.49961E-02 |
| 8.20739E-02 | 8.89180E-02 | 1.03662E-01 | 1.06898E-01 | 1.11938E-01 |
| 1.12878E-01 | 1.23845E-01 | 1.35239E-01 | 1.40650E-01 | 1.44275E-01 |
| 1.47228E-01 | 1.51483E-01 | 1.52608E-01 | 1.55654E-01 | 1.64763E-01 |
| 1.73532E-01 | 1.76736E-01 | 1.80022E-01 | 1.85830E-01 | 1.96711E-01 |
| 2.00657E-01 | 2.06538E-01 | 2.12790E-01 | 2.15422E-01 | 2.20288E-01 |
| 2.21296E-01 | 2.30514E-01 | 2.32196E-01 | 2.47940E-01 | 2.49890E-01 |
| 2.55421E-01 | 2.58159E-01 | 2.67247E-01 | 2.75476E-01 | 2.85021E-01 |
| 2.90170E-01 | 3.00392E-01 | 3.06122E-01 | 3.09510E-01 | 3.16790E-01 |
| 3.18881E-01 | 3.22160E-01 | 3.24405E-01 | 3.28727E-01 | 3.33404E-01 |
| 3.34528E-01 | 3.38383E-01 | 3.46252E-01 | 3.50535E-01 | 3.55123E-01 |
| 3.59079E-01 | 3.63714E-01 | 3.68358E-01 | 3.74953E-01 | 3.84356E-01 |
| 3.87029E-01 | 3.96984E-01 | 4.03835E-01 | 4.10045E-01 | 4.19408E-01 |
| 4.22810E-01 | 4.31781E-01 | 4.46500E-01 | 4.56560E-01 | 4.59526E-01 |
| 4.66990E-01 | 4.78307E-01 | 4.86584E-01 | 5.01405E-01 | 5.15234E-01 |
| 5.35939E-01 | 5.45233E-01 | 5.86235E-01 | 6.24710E-01 | 6.67357E-01 |
| 6.87698E-01 | 7.32078E-01 | 7.83296E-01 | 1.05679E+00 | 1.26916E+00 |

WARNING: Hessian has wrong number of negative eigenvalues

Level shifts adjusted to satisfy step-size constraints

Step size: 0.0265681

Cos(theta): 0.8678432

Final level shift: -1.9439479E-01

energy change: 3.2820E-04 . ( 5.0000E-05 )

gradient maximum: 4.1685E-03 . ( 4.5000E-04 )

gradient rms: 1.1798E-03 . ( 3.0000E-04 )

step size: 0.02657 trust radius: 0.02652

displacement maximum: 6.8365E-03 . ( 1.8000E-03 )

displacement rms: 2.3763E-03 . ( 1.2000E-03 )

predicted energy change: -2.2067E-04 geom step: 2.6568E-02 full step:  
2.6568E-02

molecular structure not yet converged...

center of mass moved by:

x: -1.6653E-16 y: 6.7654E-17 z: -5.5511E-17

new geometry:

|      | angstroms     |               |               |
|------|---------------|---------------|---------------|
| atom | x             | y             | z             |
| H25  | 0.9710761692  | -3.9286413642 | -2.1828451837 |
| C1   | 1.5210628282  | -3.0085086925 | -2.1487172297 |
| C2   | 2.9891060011  | -0.5928392197 | -2.0809386577 |
| C3   | 1.1605174873  | -1.9975481736 | -1.2659005475 |
| C4   | 2.5995847207  | -2.8039496956 | -2.9867406663 |
| C5   | 3.3274194457  | -1.6103340597 | -2.9514545732 |
| C6   | 1.9044304502  | -0.8083880317 | -1.2544071872 |
| C7   | 0.1055663203  | -1.8636015171 | -0.2563000348 |
| H27  | 2.8874490623  | -3.5721748397 | -3.6761909147 |
| H28  | 4.1601039206  | -1.4825610291 | -3.6112498125 |
| H30  | 3.5241459795  | 0.3321462181  | -2.0273647060 |
| C8   | 0.2444275768  | -0.6476496065 | 0.2883165349  |
| H32  | -0.6354004276 | -2.5936217966 | -0.0228418196 |
| C10  | -0.3830287784 | 0.2576910899  | 1.3234829307  |
| N2   | 1.3296985246  | 0.0065527973  | -0.2961160580 |
| C9   | 1.6190886794  | 1.2430987080  | 0.2263345077  |
| O1   | 2.5425730769  | 1.9496310973  | -0.1077971456 |
| H43  | -0.3662424600 | -0.2210625444 | 2.2933013467  |

|     |               |              |               |
|-----|---------------|--------------|---------------|
| C12 | -1.8167080643 | 0.6206555444 | 0.9733676575  |
| C11 | 0.5811843550  | 1.4983172005 | 1.3298749907  |
| C18 | 1.3236511200  | 1.6854695713 | 2.6674527418  |
| H48 | 0.0355598932  | 2.4006846895 | 1.0914397457  |
| C13 | -3.4435010259 | 1.4260073169 | -0.6079216112 |
| C14 | -4.1283552859 | 0.8417968781 | 1.6117041540  |
| C15 | -4.4428476458 | 1.3060953669 | 0.3476532957  |
| C16 | -2.8193215751 | 0.5012118945 | 1.9213524917  |
| C17 | -2.1416529372 | 1.0841747355 | -0.2974143576 |
| H51 | -5.4530667511 | 1.5665501699 | 0.1044683608  |
| H52 | -2.5843705111 | 0.1375866592 | 2.9031055975  |
| H55 | -3.6816104404 | 1.7776198332 | -1.5918554636 |
| H56 | -4.8944365154 | 0.7394763208 | 2.3542858101  |
| H59 | -1.3762357040 | 1.1606002751 | -1.0444961466 |
| H60 | 1.8481366833  | 0.7770713691 | 2.9426397013  |
| H61 | 0.6217691853  | 1.9341274667 | 3.4555084934  |
| H62 | 2.0440604976  | 2.4879423273 | 2.5745757944  |

nuclear repulsion energy..... 1446.844283190 hartrees

-----  
 / end of geometry optimization iteration 13 /  
 -----

end of program geopt

start of program onee  
 smallest eigenvalue of S: 1.217E-03  
 number of canonical orbitals..... 210  
 end of program onee

start of program probe  
 end of program probe

start of program grid

number of gridpoints:

| atom     | H25 | C1  | C2  | C3  | C4  | C5  | C6  | C7  |
|----------|-----|-----|-----|-----|-----|-----|-----|-----|
| grid # 1 | 73  | 89  | 87  | 90  | 87  | 87  | 85  | 85  |
| grid # 2 | 106 | 99  | 97  | 98  | 98  | 99  | 91  | 92  |
| grid # 3 | 224 | 183 | 183 | 194 | 182 | 182 | 187 | 182 |
| grid # 4 | 224 | 379 | 380 | 407 | 379 | 379 | 374 | 377 |

number of gridpoints:

| atom     | H27 | H28 | H30 | C8  | H32 | C10 | N2  | C9  |
|----------|-----|-----|-----|-----|-----|-----|-----|-----|
| grid # 1 | 73  | 73  | 73  | 86  | 73  | 81  | 100 | 76  |
| grid # 2 | 106 | 106 | 105 | 91  | 106 | 93  | 109 | 80  |
| grid # 3 | 224 | 224 | 220 | 188 | 223 | 175 | 223 | 165 |
| grid # 4 | 224 | 224 | 218 | 374 | 228 | 348 | 400 | 334 |

number of gridpoints:

| atom     | O1  | H43 | C12 | C11 | C18 | H48 | C13 | C14 |
|----------|-----|-----|-----|-----|-----|-----|-----|-----|
| grid # 1 | 111 | 68  | 90  | 82  | 71  | 69  | 88  | 87  |
| grid # 2 | 127 | 98  | 105 | 94  | 76  | 99  | 100 | 100 |
| grid # 3 | 272 | 209 | 193 | 175 | 148 | 215 | 183 | 183 |
| grid # 4 | 473 | 201 | 400 | 352 | 306 | 208 | 379 | 379 |

number of gridpoints:

| atom     | C15 | C16 | C17 | H51 | H52 | H55 | H56 | H59 |
|----------|-----|-----|-----|-----|-----|-----|-----|-----|
| grid # 1 | 89  | 87  | 86  | 73  | 73  | 73  | 73  | 70  |

|          |     |     |     |     |     |     |     |     |
|----------|-----|-----|-----|-----|-----|-----|-----|-----|
| grid # 2 | 100 | 100 | 96  | 106 | 104 | 106 | 106 | 101 |
| grid # 3 | 183 | 182 | 181 | 224 | 214 | 224 | 224 | 215 |
| grid # 4 | 379 | 378 | 376 | 224 | 214 | 224 | 224 | 214 |

number of gridpoints:

|          |     |     |     |       |
|----------|-----|-----|-----|-------|
| atom     | H60 | H61 | H62 | total |
| grid # 1 | 71  | 71  | 71  | 2821  |
| grid # 2 | 99  | 99  | 99  | 3491  |
| grid # 3 | 217 | 220 | 220 | 7041  |
| grid # 4 | 218 | 222 | 221 | 10841 |

end of program grid

start of program rwr

```
recomputing RwR matrix 14    grid: 4
recomputing RwR matrix 15    grid: 4
end of program rwr
```

start of program scf

|      | i | u | d | i | g |                  |               | RMS     | maximum |
|------|---|---|---|---|---|------------------|---------------|---------|---------|
|      | t | p | i | c | r |                  |               | energy  | DIIS    |
|      | e | d | i | u | i |                  |               | density | error   |
|      | r | t | s | t | d | total energy     | energy change | change  |         |
| etot | 1 | N | N | 1 | U | -815.14149424438 |               | 1.4E-04 | 3.6E-03 |
| etot | 2 | Y | Y | 4 | M | -815.14216459325 | 6.7E-04       | 4.9E-05 | 1.0E-03 |
| etot | 3 | Y | Y | 4 | M | -815.14223278719 | 6.8E-05       | 1.6E-05 | 3.5E-04 |
| etot | 4 | Y | Y | 4 | M | -815.14223995311 | 7.2E-06       | 6.3E-06 | 1.5E-04 |
| etot | 5 | Y | Y | 4 | M | -815.14224081391 | 8.6E-07       | 2.2E-06 | 5.3E-05 |
| etot | 6 | N | N | 1 | U | -815.14224334138 | 2.5E-06       | 0.0E+00 | 0.0E+00 |

Energy components, in hartrees:

```
(A) Nuclear repulsion..... 1446.84428318973
(E) Total one-electron terms..... -3979.18371144226
(I) Total two-electron terms..... 1717.19718491114
(L) Electronic energy..... -2261.98652653112 (E+I)
(N) Total energy..... -815.14224334138 (A+L)
```

SCFE: SCF energy: HF -815.14224334138 hartrees iterations: 6

```
HOMO energy: -0.29654
LUMO energy: 0.11796
```

Orbital energies:

|           |           |           |           |           |           |
|-----------|-----------|-----------|-----------|-----------|-----------|
| -20.45227 | -15.55257 | -11.32177 | -11.23587 | -11.22238 | -11.21360 |
| -11.20718 | -11.20055 | -11.18774 | -11.18603 | -11.18552 | -11.18503 |
| -11.18357 | -11.18321 | -11.17902 | -11.17694 | -11.17678 | -11.17653 |
| -11.17533 | -11.17234 | -1.42293  | -1.33329  | -1.18043  | -1.16234  |
| -1.11547  | -1.08820  | -1.04094  | -1.02744  | -1.02007  | -1.00000  |
| -0.94674  | -0.90584  | -0.85546  | -0.84376  | -0.83109  | -0.81144  |
| -0.79426  | -0.76214  | -0.72100  | -0.68955  | -0.67902  | -0.66925  |
| -0.65827  | -0.64122  | -0.63977  | -0.62705  | -0.61176  | -0.60580  |
| -0.60410  | -0.60113  | -0.59179  | -0.57676  | -0.55927  | -0.55465  |
| -0.54109  | -0.53107  | -0.51674  | -0.50801  | -0.49952  | -0.49650  |
| -0.49091  | -0.48653  | -0.45909  | -0.42171  | -0.39337  | -0.34949  |
| -0.34226  | -0.31539  | -0.29654  | 0.11796   | 0.13398   | 0.13979   |
| 0.14373   | 0.20530   | 0.22619   | 0.26461   | 0.27082   | 0.27323   |

```

0.30011

end of program scf

start of program derla
end of program derla

start of program rwr
recomputing RwR matrix 14      grid: 4
recomputing RwR matrix 15      grid: 4
end of program rwr

start of program derlb

forces (hartrees/bohr) : total

atom  label      x      y      z
-----
 1    H25      1.179817E-04  4.866811E-04  2.915231E-04
 2    C1      -1.235021E-03  2.241895E-05  1.895621E-04
 3    C2      -2.771048E-04 -5.719622E-04 -5.936928E-04
 4    C3       7.221481E-04 -4.451166E-04  5.015560E-04
 5    C4       3.836452E-04  6.637549E-04  5.597747E-04
 6    C5      -5.791712E-04  1.000569E-03  7.709635E-04
 7    C6       5.878341E-04 -7.244541E-04 -5.787658E-04
 8    C7      -1.070790E-03  1.383827E-04 -1.274090E-03
 9    H27       1.491187E-04  2.314319E-06 -8.848191E-06
10    H28       9.134500E-04  2.867911E-06 -7.500650E-04
11    H30       3.900779E-04 -4.435394E-04 -2.741252E-04
12    C8       1.257371E-04  6.584917E-04  5.335397E-04
13    H32       1.245686E-04  4.140946E-04 -7.694066E-05
14    C10       1.188972E-03 -4.449516E-04 -1.066796E-04
15    N2      -2.217309E-04 -6.400183E-04 -2.994458E-04
16    C9       3.091174E-04  1.062786E-03  1.765236E-04
17    O1      -7.617849E-04 -9.212584E-04  3.047989E-04
18    H43       2.658259E-04 -7.234424E-05  3.234769E-04
19    C12      -5.893941E-04 -1.855076E-04 -2.801349E-04
20    C11       6.093686E-04  2.864218E-04  3.107997E-04
21    C18      -1.398873E-03  2.433899E-04  1.013341E-04
22    H48       3.812528E-04 -2.835115E-04 -4.969214E-04
23    C13       3.758253E-04 -2.281232E-04  6.800739E-04
24    C14       1.902920E-04  2.699950E-04 -8.370655E-04
25    C15       4.579277E-04 -3.961056E-04  7.617007E-04
26    C16      -2.208390E-04  3.710826E-04 -3.723683E-04
27    C17       2.152106E-04 -7.800421E-05  5.608093E-04
28    H51      -2.809388E-04  1.376977E-04 -2.026562E-05
29    H52      -4.240987E-05  2.612596E-05 -7.924644E-06
30    H55       1.239186E-05  1.188466E-04 -3.692739E-05
31    H56      -5.321630E-05  1.356248E-04  2.327213E-05
32    H59      -9.669621E-05 -1.373468E-05 -1.292145E-04
33    H60       9.105557E-05  3.205210E-04 -2.740002E-04
34    H61       3.787267E-04 -7.804601E-05 -3.885609E-04
35    H62       2.244349E-04 -1.041814E-04 -3.586584E-05
-----
total      1.386993E-03  7.312069E-04 -7.521941E-04

end of program derlb

```

start of program geopt 14

geometry optimization step 14

reading input hessian of dimension 105  
in five columns format

reading input hessian of dimension 105  
in five columns format

Hessian eigenvalues:

|              |             |             |             |             |
|--------------|-------------|-------------|-------------|-------------|
| -2.97418E-03 | 0.00000E+00 | 0.00000E+00 | 0.00000E+00 | 0.00000E+00 |
| 0.00000E+00  | 0.00000E+00 | 0.00000E+00 | 0.00000E+00 | 0.00000E+00 |
| 0.00000E+00  | 0.00000E+00 | 0.00000E+00 | 0.00000E+00 | 0.00000E+00 |
| 0.00000E+00  | 0.00000E+00 | 0.00000E+00 | 0.00000E+00 | 0.00000E+00 |
| 0.00000E+00  | 0.00000E+00 | 0.00000E+00 | 0.00000E+00 | 0.00000E+00 |
| 0.00000E+00  | 0.00000E+00 | 2.63127E-03 | 1.83963E-02 | 1.90283E-02 |
| 2.43600E-02  | 2.82220E-02 | 2.96024E-02 | 3.06129E-02 | 3.09529E-02 |
| 3.17052E-02  | 3.73316E-02 | 4.43038E-02 | 4.53679E-02 | 4.82289E-02 |
| 5.93986E-02  | 6.50534E-02 | 7.10790E-02 | 7.19334E-02 | 7.51098E-02 |
| 8.05618E-02  | 9.29380E-02 | 1.04526E-01 | 1.05953E-01 | 1.12179E-01 |
| 1.15527E-01  | 1.23756E-01 | 1.27717E-01 | 1.38944E-01 | 1.42585E-01 |
| 1.49171E-01  | 1.52284E-01 | 1.54516E-01 | 1.55982E-01 | 1.63659E-01 |
| 1.71930E-01  | 1.76443E-01 | 1.81932E-01 | 1.85501E-01 | 1.95030E-01 |
| 2.02172E-01  | 2.05498E-01 | 2.09726E-01 | 2.15266E-01 | 2.18817E-01 |
| 2.22371E-01  | 2.28154E-01 | 2.31477E-01 | 2.45502E-01 | 2.48159E-01 |
| 2.54514E-01  | 2.62812E-01 | 2.64579E-01 | 2.82061E-01 | 2.86060E-01 |
| 2.88147E-01  | 2.98442E-01 | 2.99841E-01 | 3.09865E-01 | 3.13554E-01 |
| 3.16553E-01  | 3.20555E-01 | 3.27186E-01 | 3.28041E-01 | 3.33675E-01 |
| 3.34939E-01  | 3.35987E-01 | 3.39925E-01 | 3.48837E-01 | 3.55004E-01 |
| 3.56475E-01  | 3.64348E-01 | 3.67695E-01 | 3.72464E-01 | 3.74847E-01 |
| 3.83739E-01  | 3.89854E-01 | 4.03506E-01 | 4.05744E-01 | 4.15961E-01 |
| 4.23465E-01  | 4.29602E-01 | 4.40586E-01 | 4.53439E-01 | 4.55371E-01 |
| 4.61758E-01  | 4.76220E-01 | 4.87989E-01 | 4.96019E-01 | 5.06823E-01 |
| 5.23366E-01  | 5.59003E-01 | 5.79574E-01 | 6.20808E-01 | 6.75828E-01 |
| 7.16385E-01  | 7.37925E-01 | 7.84620E-01 | 1.08451E+00 | 1.27755E+00 |

WARNING: Hessian has wrong number of negative eigenvalues

Level shifts adjusted to satisfy step-size constraints

Step size: 0.0375488

Cos(theta): 0.6951004

Final level shift: -6.9066508E-02

energy change: 4.1778E-05 \* ( 5.0000E-05 )

gradient maximum: 1.6601E-03 . ( 4.5000E-04 )

gradient rms: 4.7825E-04 . ( 3.0000E-04 )

step size: 0.03755 trust radius: 0.03750

displacement maximum: 1.6080E-02 . ( 1.8000E-03 )

displacement rms: 3.3585E-03 . ( 1.2000E-03 )

predicted energy change: -1.1847E-04 geom step: 3.7549E-02 full step:  
3.7549E-02

molecular structure not yet converged...

center of mass moved by:

x: 2.5025E-03 y: -1.8247E-03 z: -2.1789E-04

new geometry:

|      | angstroms    |               |               |
|------|--------------|---------------|---------------|
| atom | x            | y             | z             |
| H25  | 0.9589695046 | -3.9191206159 | -2.1987768391 |
| C1   | 1.5157997707 | -3.0044661203 | -2.1589845316 |

|     |               |               |               |
|-----|---------------|---------------|---------------|
| C2  | 3.0026280297  | -0.6010594024 | -2.0735006242 |
| C3  | 1.1572307715  | -1.9937575446 | -1.2766036420 |
| C4  | 2.6038166599  | -2.8052935157 | -2.9864837734 |
| C5  | 3.3410342525  | -1.6180797162 | -2.9426214909 |
| C6  | 1.9100404655  | -0.8108990893 | -1.2568789389 |
| C7  | 0.0951531335  | -1.8551669208 | -0.2753875450 |
| H27 | 2.8926170419  | -3.5737084202 | -3.6754352570 |
| H28 | 4.1821227047  | -1.4968870892 | -3.5953345921 |
| H30 | 3.5469285212  | 0.3177749450  | -2.0129824400 |
| C8  | 0.2418523574  | -0.6438554310 | 0.2775506822  |
| H32 | -0.6538219067 | -2.5791501559 | -0.0499838853 |
| C10 | -0.3827996017 | 0.2582442755  | 1.3165353347  |
| N2  | 1.3332495877  | 0.0054208854  | -0.3001184665 |
| C9  | 1.6250205200  | 1.2394457985  | 0.2271555077  |
| O1  | 2.5531538121  | 1.9404545161  | -0.0990626140 |
| H43 | -0.3633874063 | -0.2244610111 | 2.2849663110  |
| C12 | -1.8185589893 | 0.6215505971  | 0.9730325540  |
| C11 | 0.5812780371  | 1.4991091728  | 1.3231102103  |
| C18 | 1.3109740696  | 1.6976587815  | 2.6645913754  |
| H48 | 0.0365150297  | 2.3990433036  | 1.0743742548  |
| C13 | -3.4544199043 | 1.4267342198  | -0.5971209918 |
| C14 | -4.1270750118 | 0.8404861564  | 1.6238270400  |
| C15 | -4.4487705207 | 1.3053238789  | 0.3629989675  |
| C16 | -2.8162842291 | 0.5007445739  | 1.9257385486  |
| C17 | -2.1506708167 | 1.0857308231  | -0.2947614348 |
| H51 | -5.4605700154 | 1.5656266210  | 0.1251807352  |
| H52 | -2.5764215386 | 0.1365405753  | 2.9060857829  |
| H55 | -3.6982624878 | 1.7795610711  | -1.5794644457 |
| H56 | -4.8888042664 | 0.7375789349  | 2.3706843183  |
| H59 | -1.3905551905 | 1.1628790517  | -1.0471752601 |
| H60 | 1.8342053389  | 0.7921456412  | 2.9513475791  |
| H61 | 0.6025599111  | 1.9522647918  | 3.4445545631  |
| H62 | 2.0327365134  | 2.4990092717  | 2.5712906042  |

nuclear repulsion energy..... 1446.685357034 hartrees

/ end of geometry optimization iteration 14 /

end of program geopt

start of program onee  
smallest eigenvalue of S: 1.212E-03  
number of canonical orbitals..... 210  
end of program onee

start of program probe  
end of program probe

start of program grid

number of gridpoints:

| atom     | H25 | C1  | C2  | C3  | C4  | C5  | C6  | C7  |
|----------|-----|-----|-----|-----|-----|-----|-----|-----|
| grid # 1 | 73  | 89  | 87  | 90  | 87  | 87  | 85  | 85  |
| grid # 2 | 106 | 100 | 97  | 98  | 98  | 98  | 91  | 92  |
| grid # 3 | 224 | 183 | 182 | 194 | 182 | 182 | 187 | 182 |
| grid # 4 | 224 | 379 | 381 | 406 | 379 | 379 | 372 | 377 |

number of gridpoints:



|          |     |     |     |     |     |     |     |     |
|----------|-----|-----|-----|-----|-----|-----|-----|-----|
| atom     | H27 | H28 | H30 | C8  | H32 | C10 | N2  | C9  |
| grid # 1 | 73  | 73  | 73  | 86  | 73  | 81  | 100 | 76  |
| grid # 2 | 106 | 106 | 105 | 91  | 106 | 92  | 109 | 81  |
| grid # 3 | 224 | 224 | 220 | 188 | 223 | 175 | 223 | 165 |
| grid # 4 | 224 | 224 | 219 | 374 | 228 | 351 | 401 | 330 |

number of gridpoints:

|          |     |     |     |     |     |     |     |     |
|----------|-----|-----|-----|-----|-----|-----|-----|-----|
| atom     | O1  | H43 | C12 | C11 | C18 | H48 | C13 | C14 |
| grid # 1 | 111 | 68  | 90  | 82  | 71  | 70  | 88  | 87  |
| grid # 2 | 123 | 98  | 105 | 94  | 75  | 99  | 100 | 100 |
| grid # 3 | 272 | 209 | 193 | 174 | 141 | 215 | 183 | 183 |
| grid # 4 | 474 | 200 | 400 | 352 | 308 | 208 | 379 | 379 |

number of gridpoints:

|          |     |     |     |     |     |     |     |     |
|----------|-----|-----|-----|-----|-----|-----|-----|-----|
| atom     | C15 | C16 | C17 | H51 | H52 | H55 | H56 | H59 |
| grid # 1 | 89  | 87  | 86  | 73  | 73  | 73  | 73  | 70  |
| grid # 2 | 100 | 100 | 97  | 106 | 104 | 106 | 106 | 101 |
| grid # 3 | 183 | 182 | 181 | 224 | 214 | 224 | 224 | 215 |
| grid # 4 | 379 | 377 | 376 | 224 | 214 | 224 | 224 | 214 |

number of gridpoints:

|          |     |     |     |       |
|----------|-----|-----|-----|-------|
| atom     | H60 | H61 | H62 | total |
| grid # 1 | 71  | 71  | 71  | 2822  |
| grid # 2 | 99  | 99  | 99  | 3487  |
| grid # 3 | 217 | 220 | 220 | 7032  |
| grid # 4 | 218 | 223 | 221 | 10842 |

end of program grid

start of program rwr

recomputing Rwr matrix 15 grid: 4

end of program rwr

start of program scf

|      | i | u | d | i | g |                  |         | RMS     | maximum |
|------|---|---|---|---|---|------------------|---------|---------|---------|
|      | t | p | i | c | r |                  |         | density | DIIS    |
|      | e | d | i | u | i |                  | energy  | change  | error   |
|      | r | t | s | t | d | total energy     | change  |         |         |
| etot | 1 | N | N | 1 | U | -815.14170113503 |         | 1.1E-04 | 3.7E-03 |
| etot | 2 | Y | Y | 4 | M | -815.14224578714 | 5.4E-04 | 4.5E-05 | 1.5E-03 |
| etot | 3 | Y | Y | 4 | M | -815.14230797425 | 6.2E-05 | 1.5E-05 | 4.6E-04 |
| etot | 4 | Y | Y | 4 | M | -815.14231339573 | 5.4E-06 | 4.3E-06 | 1.2E-04 |
| etot | 5 | Y | N | 4 | M | -815.14231612826 | 2.7E-06 | 0.0E+00 | 0.0E+00 |

Energy components, in hartrees:

|     |                               |                   |       |
|-----|-------------------------------|-------------------|-------|
| (A) | Nuclear repulsion.....        | 1446.68535703399  |       |
| (E) | Total one-electron terms..... | -3978.86466946382 |       |
| (I) | Total two-electron terms..... | 1717.03699630157  |       |
| (L) | Electronic energy.....        | -2261.82767316225 | (E+I) |
| (N) | Total energy.....             | -815.14231612826  | (A+L) |

SCFE: SCF energy: HF -815.14231612826 hartrees iterations: 5

HOMO energy: -0.29655

LUMO energy: 0.11832

Orbital energies:

```

-20.45247 -15.55212 -11.32139 -11.23560 -11.22224 -11.21357
-11.20688 -11.20049 -11.18749 -11.18592 -11.18538 -11.18494
-11.18348 -11.18310 -11.17880 -11.17665 -11.17658 -11.17632
-11.17530 -11.17224 -1.42408 -1.33327 -1.18063 -1.16263
-1.11556 -1.08814 -1.04111 -1.02752 -1.02010 -1.00026
-0.94681 -0.90573 -0.85548 -0.84377 -0.83111 -0.81124
-0.79423 -0.76224 -0.72103 -0.68996 -0.67889 -0.66920
-0.65834 -0.64106 -0.63997 -0.62707 -0.61184 -0.60619
-0.60400 -0.60119 -0.59194 -0.57680 -0.55937 -0.55488
-0.54100 -0.53115 -0.51670 -0.50806 -0.49959 -0.49653
-0.49106 -0.48641 -0.45927 -0.42176 -0.39340 -0.34950
-0.34248 -0.31528 -0.29655 0.11832 0.13423 0.13987
0.14373 0.20559 0.22613 0.26464 0.27090 0.27320
0.30015

```

end of program scf

start of program derla  
end of program derla

start of program rwr  
recomputing RwR matrix 15 grid: 4  
end of program rwr

start of program derlb

forces (hartrees/bohr) : total

| atom | label | x             | y             | z             |
|------|-------|---------------|---------------|---------------|
| 1    | H25   | -8.025048E-05 | -1.795033E-04 | 4.146906E-05  |
| 2    | C1    | -1.409234E-04 | 3.505474E-04  | -1.822963E-04 |
| 3    | C2    | 3.149233E-04  | 9.171207E-05  | -2.950762E-04 |
| 4    | C3    | -7.823079E-05 | -3.377136E-04 | 4.745332E-04  |
| 5    | C4    | 2.346343E-04  | -2.271952E-04 | 3.509597E-05  |
| 6    | C5    | 1.918872E-04  | 2.140402E-04  | -3.111634E-04 |
| 7    | C6    | -2.692367E-04 | 1.623176E-04  | 3.721926E-04  |
| 8    | C7    | -4.910106E-04 | 2.691617E-04  | -7.824689E-04 |
| 9    | H27   | 4.208542E-05  | -6.633096E-05 | 3.193454E-05  |
| 10   | H28   | -6.543623E-06 | -9.775006E-06 | -3.595065E-05 |
| 11   | H30   | 1.177477E-04  | -9.060800E-05 | -1.351522E-04 |
| 12   | C8    | -4.770779E-04 | 5.362225E-04  | -2.265859E-04 |
| 13   | H32   | 1.263171E-04  | 1.448655E-04  | -4.217583E-05 |
| 14   | C10   | 7.571020E-04  | -3.820697E-04 | -2.697170E-04 |
| 15   | N2    | -2.619029E-05 | -7.668667E-04 | 2.703872E-04  |
| 16   | C9    | -9.793730E-04 | -7.803880E-04 | 8.537382E-04  |
| 17   | O1    | 1.629758E-03  | 1.111533E-03  | -4.626050E-04 |
| 18   | H43   | 4.365384E-04  | 1.957163E-04  | -3.310185E-06 |
| 19   | C12   | 9.077640E-05  | -5.568121E-04 | 3.856700E-04  |
| 20   | C11   | -2.785692E-04 | 1.674835E-04  | 1.968460E-04  |
| 21   | C18   | -6.521093E-04 | 9.195429E-05  | 1.361220E-04  |
| 22   | H48   | 1.762756E-04  | -1.495686E-04 | -5.976015E-04 |
| 23   | C13   | 1.412589E-04  | 8.196726E-05  | -9.370457E-05 |
| 24   | C14   | 1.403468E-04  | 8.737614E-05  | -1.275262E-05 |
| 25   | C15   | 9.059954E-05  | -5.327267E-05 | 6.143330E-05  |
| 26   | C16   | -2.433591E-04 | 2.510468E-04  | 8.712440E-05  |
| 27   | C17   | 1.591009E-04  | 2.679170E-05  | -1.843492E-05 |
| 28   | H51   | -8.903734E-05 | 8.069521E-05  | 9.095047E-06  |

|       |       |               |               |               |
|-------|-------|---------------|---------------|---------------|
| 29    | H52   | 2.091611E-05  | 1.818073E-05  | -1.471576E-05 |
| 30    | H55   | 7.355751E-05  | 3.488312E-05  | 7.478818E-05  |
| 31    | H56   | -5.746227E-05 | 5.823815E-05  | 1.023537E-04  |
| 32    | H59   | 5.975291E-06  | 6.814520E-06  | -3.284648E-05 |
| 33    | H60   | 5.230320E-05  | 2.616353E-04  | -1.651178E-04 |
| 34    | H61   | 3.268409E-04  | -2.977286E-05 | -3.066233E-04 |
| 35    | H62   | 1.107722E-04  | -4.860867E-05 | 1.566509E-05  |
| ----- |       |               |               |               |
|       | total | 1.370343E-03  | 5.646977E-04  | -8.398501E-04 |

end of program derlb

start of program geopt 15

geometry optimization step 15

reading input hessian of dimension 105

in five columns format

reading input hessian of dimension 105

in five columns format

Hessian eigenvalues:

|              |              |              |              |              |
|--------------|--------------|--------------|--------------|--------------|
| -1.16865E-02 | 0.000000E+00 | 0.000000E+00 | 0.000000E+00 | 0.000000E+00 |
| 0.000000E+00 | 0.000000E+00 | 0.000000E+00 | 0.000000E+00 | 0.000000E+00 |
| 0.000000E+00 | 0.000000E+00 | 0.000000E+00 | 0.000000E+00 | 0.000000E+00 |
| 0.000000E+00 | 0.000000E+00 | 0.000000E+00 | 0.000000E+00 | 0.000000E+00 |
| 0.000000E+00 | 0.000000E+00 | 0.000000E+00 | 0.000000E+00 | 0.000000E+00 |
| 0.000000E+00 | 0.000000E+00 | 2.24865E-03  | 6.17521E-03  | 2.03372E-02  |
| 2.28466E-02  | 2.82016E-02  | 2.95058E-02  | 3.04158E-02  | 3.08239E-02  |
| 3.14464E-02  | 3.73674E-02  | 4.44871E-02  | 4.49529E-02  | 4.81535E-02  |
| 6.01426E-02  | 6.42246E-02  | 7.09405E-02  | 7.16561E-02  | 7.39448E-02  |
| 8.35376E-02  | 9.14068E-02  | 9.60798E-02  | 1.04420E-01  | 1.12159E-01  |
| 1.13063E-01  | 1.21838E-01  | 1.36531E-01  | 1.38116E-01  | 1.41806E-01  |
| 1.43189E-01  | 1.51188E-01  | 1.54812E-01  | 1.56221E-01  | 1.62468E-01  |
| 1.73250E-01  | 1.80272E-01  | 1.83818E-01  | 1.85391E-01  | 1.90626E-01  |
| 2.00924E-01  | 2.03598E-01  | 2.12704E-01  | 2.15711E-01  | 2.19584E-01  |
| 2.25173E-01  | 2.32776E-01  | 2.40499E-01  | 2.46385E-01  | 2.50839E-01  |
| 2.53010E-01  | 2.61928E-01  | 2.63572E-01  | 2.72997E-01  | 2.89038E-01  |
| 2.92838E-01  | 2.97757E-01  | 3.03365E-01  | 3.10116E-01  | 3.10285E-01  |
| 3.15249E-01  | 3.22864E-01  | 3.25237E-01  | 3.29462E-01  | 3.34166E-01  |
| 3.35666E-01  | 3.37742E-01  | 3.42882E-01  | 3.48691E-01  | 3.53683E-01  |
| 3.59917E-01  | 3.64845E-01  | 3.78690E-01  | 3.83184E-01  | 3.86408E-01  |
| 3.94975E-01  | 4.03419E-01  | 4.05910E-01  | 4.16094E-01  | 4.23411E-01  |
| 4.30353E-01  | 4.35163E-01  | 4.53803E-01  | 4.58307E-01  | 4.61693E-01  |
| 4.66577E-01  | 4.87167E-01  | 4.97582E-01  | 5.03693E-01  | 5.22749E-01  |
| 5.31423E-01  | 5.81086E-01  | 5.94415E-01  | 6.48742E-01  | 6.88192E-01  |
| 7.05064E-01  | 7.29895E-01  | 8.48785E-01  | 1.06634E+00  | 1.42378E+00  |

WARNING: Hessian has wrong number of negative eigenvalues

Level shifts adjusted to satisfy step-size constraints

Step size: 0.0537587

Cos(theta): 0.7523557

Final level shift: -4.2249227E-02

energy change: -7.2787E-05 . ( 5.0000E-05 )

gradient maximum: 1.9722E-03 . ( 4.5000E-04 )

gradient rms: 3.0998E-04 . ( 3.0000E-04 )

step size: 0.05376 trust radius: 0.05303

displacement maximum: 2.3073E-02 . ( 1.8000E-03 )

displacement rms: 4.8083E-03 . ( 1.2000E-03 )  
 predicted energy change: -1.3114E-04 geom step: 5.3758E-02 full step:  
 5.3758E-02  
 molecular structure not yet converged...

center of mass moved by:  
 x: 5.0467E-03 y: -3.6590E-03 z: 1.1536E-03

new geometry:

|      | angstroms     |               |               |
|------|---------------|---------------|---------------|
| atom | x             | y             | z             |
| H25  | 0.9464246191  | -3.9104500176 | -2.2213508009 |
| C1   | 1.5111468239  | -3.0004541363 | -2.1739024670 |
| C2   | 3.0190054840  | -0.6107595698 | -2.0665858253 |
| C3   | 1.1532106891  | -1.9904717079 | -1.2896703181 |
| C4   | 2.6090102518  | -2.8079848559 | -2.9917960682 |
| C5   | 3.3558419245  | -1.6270903345 | -2.9377466029 |
| C6   | 1.9169593416  | -0.8141927235 | -1.2584020109 |
| C7   | 0.0833013311  | -1.8470465407 | -0.2980641099 |
| H27  | 2.8972678578  | -3.5763464050 | -3.6809112157 |
| H28  | 4.2027774827  | -1.5098868331 | -3.5841704762 |
| H30  | 3.5717810467  | 0.3025681022  | -1.9987604082 |
| C8   | 0.2369179753  | -0.6397560314 | 0.2630442074  |
| H32  | -0.6739179651 | -2.5656947773 | -0.0822946124 |
| C10  | -0.3846281323 | 0.2586676522  | 1.3058823131  |
| N2   | 1.3386005592  | 0.0021416272  | -0.3025163871 |
| C9   | 1.6369649032  | 1.2318648702  | 0.2329939987  |
| O1   | 2.5795114971  | 1.9241326233  | -0.0781883160 |
| H43  | -0.3601341219 | -0.2269978617 | 2.2729930481  |
| C12  | -1.8223203601 | 0.6230584314  | 0.9719009211  |
| C11  | 0.5798060189  | 1.4999002708  | 1.3141009327  |
| C18  | 1.2906894515  | 1.7175712928  | 2.6618451733  |
| H48  | 0.0362741124  | 2.3956535638  | 1.0474814929  |
| C13  | -3.4697283652 | 1.4294168195  | -0.5850213941 |
| C14  | -4.1277001005 | 0.8420339496  | 1.6396501862  |
| C15  | -4.4581094092 | 1.3072590736  | 0.3815722581  |
| C16  | -2.8145254152 | 0.5020863477  | 1.9313711553  |
| C17  | -2.1632864258 | 1.0882648449  | -0.2926419091 |
| H51  | -5.4719338530 | 1.5673933922  | 0.1508194639  |
| H52  | -2.5685683397 | 0.1360351276  | 2.9095281178  |
| H55  | -3.7201156665 | 1.7829178294  | -1.5653303263 |
| H56  | -4.8844683413 | 0.7379516967  | 2.3918860043  |
| H59  | -1.4092127132 | 1.1658628911  | -1.0507898874 |
| H60  | 1.8123781797  | 0.8172020443  | 2.9675454150  |
| H61  | 0.5710810235  | 1.9816298086  | 3.4282224194  |
| H62  | 2.0137114338  | 2.5187121183  | 2.5682871097  |

nuclear repulsion energy..... 1445.663368389 hartrees

-----  
 / end of geometry optimization iteration 15 /  
 -----

end of program geopt

start of program onee  
 smallest eigenvalue of S: 1.217E-03  
 number of canonical orbitals..... 210  
 end of program onee

start of program probe

end of program probe

start of program grid

number of gridpoints:

|          |     |     |     |     |     |     |     |     |
|----------|-----|-----|-----|-----|-----|-----|-----|-----|
| atom     | H25 | C1  | C2  | C3  | C4  | C5  | C6  | C7  |
| grid # 1 | 73  | 89  | 87  | 90  | 87  | 87  | 85  | 85  |
| grid # 2 | 106 | 100 | 97  | 98  | 98  | 98  | 91  | 92  |
| grid # 3 | 224 | 183 | 182 | 194 | 182 | 182 | 187 | 183 |
| grid # 4 | 224 | 379 | 381 | 404 | 379 | 379 | 374 | 378 |

number of gridpoints:

|          |     |     |     |     |     |     |     |     |
|----------|-----|-----|-----|-----|-----|-----|-----|-----|
| atom     | H27 | H28 | H30 | C8  | H32 | C10 | N2  | C9  |
| grid # 1 | 73  | 73  | 73  | 86  | 73  | 82  | 100 | 76  |
| grid # 2 | 106 | 106 | 105 | 91  | 106 | 92  | 109 | 81  |
| grid # 3 | 224 | 224 | 220 | 188 | 223 | 175 | 223 | 165 |
| grid # 4 | 224 | 224 | 219 | 374 | 228 | 351 | 402 | 332 |

number of gridpoints:

|          |     |     |     |     |     |     |     |     |
|----------|-----|-----|-----|-----|-----|-----|-----|-----|
| atom     | O1  | H43 | C12 | C11 | C18 | H48 | C13 | C14 |
| grid # 1 | 111 | 68  | 90  | 81  | 71  | 70  | 87  | 87  |
| grid # 2 | 127 | 98  | 105 | 93  | 76  | 99  | 100 | 100 |
| grid # 3 | 272 | 209 | 193 | 172 | 149 | 215 | 183 | 183 |
| grid # 4 | 473 | 200 | 401 | 352 | 306 | 208 | 379 | 379 |

number of gridpoints:

|          |     |     |     |     |     |     |     |     |
|----------|-----|-----|-----|-----|-----|-----|-----|-----|
| atom     | C15 | C16 | C17 | H51 | H52 | H55 | H56 | H59 |
| grid # 1 | 89  | 87  | 86  | 73  | 73  | 73  | 73  | 70  |
| grid # 2 | 100 | 99  | 97  | 106 | 104 | 106 | 106 | 101 |
| grid # 3 | 183 | 182 | 181 | 224 | 214 | 224 | 224 | 215 |
| grid # 4 | 379 | 377 | 376 | 224 | 214 | 224 | 224 | 214 |

number of gridpoints:

|          |     |     |     |       |
|----------|-----|-----|-----|-------|
| atom     | H60 | H61 | H62 | total |
| grid # 1 | 71  | 71  | 71  | 2821  |
| grid # 2 | 99  | 99  | 99  | 3490  |
| grid # 3 | 217 | 220 | 220 | 7039  |
| grid # 4 | 218 | 223 | 221 | 10844 |

end of program grid

start of program rwr

recomputing RwR matrix 15 grid: 4

end of program rwr

start of program scf

|      | i | u | d | i | g |                  |         | RMS     | maximum |
|------|---|---|---|---|---|------------------|---------|---------|---------|
|      | t | p | i | c | r |                  |         | density | DIIS    |
|      | e | d | i | u | i |                  | energy  | change  | error   |
|      | r | t | s | t | d | total energy     | change  |         |         |
| etot | 1 | N | N | 1 | U | -815.14120200169 |         | 1.5E-04 | 4.2E-03 |
| etot | 2 | Y | Y | 4 | M | -815.14219652930 | 9.9E-04 | 5.9E-05 | 1.7E-03 |
| etot | 3 | Y | Y | 4 | M | -815.14230765529 | 1.1E-04 | 1.9E-05 | 5.1E-04 |
| etot | 4 | Y | Y | 4 | M | -815.14231403103 | 6.4E-06 | 5.0E-06 | 1.3E-04 |
| etot | 5 | Y | N | 4 | M | -815.14231592662 | 1.9E-06 | 0.0E+00 | 0.0E+00 |

Energy components, in hartrees:

```
(A) Nuclear repulsion..... 1445.66336838851
(E) Total one-electron terms..... -3976.82146986510
(I) Total two-electron terms..... 1716.01578554997
(L) Electronic energy..... -2260.80568431513 (E+I)
(N) Total energy..... -815.14231592662 (A+L)
```

SCFE: SCF energy: HF -815.14231592662 hartrees iterations: 5

HOMO energy: -0.29653

LUMO energy: 0.11818

Orbital energies:

```
-20.45245 -15.55237 -11.32175 -11.23581 -11.22244 -11.21384
-11.20715 -11.20079 -11.18759 -11.18611 -11.18553 -11.18512
-11.18371 -11.18329 -11.17902 -11.17683 -11.17679 -11.17622
-11.17549 -11.17244 -1.42270 -1.33306 -1.18060 -1.16237
-1.11552 -1.08804 -1.04112 -1.02755 -1.01983 -1.00032
-0.94689 -0.90581 -0.85521 -0.84383 -0.83134 -0.81092
-0.79421 -0.76206 -0.72101 -0.69020 -0.67883 -0.66918
-0.65820 -0.64096 -0.63998 -0.62698 -0.61152 -0.60586
-0.60378 -0.60134 -0.59200 -0.57680 -0.55877 -0.55515
-0.54085 -0.53113 -0.51657 -0.50795 -0.49968 -0.49638
-0.49112 -0.48640 -0.45906 -0.42197 -0.39328 -0.34953
-0.34270 -0.31511 -0.29653 0.11818 0.13419 0.13935
0.14334 0.20532 0.22581 0.26463 0.27091 0.27324
0.29988
```

end of program scf

start of program derla

end of program derla

start of program rwr

recomputing RwR matrix 14 grid: 4

recomputing RwR matrix 15 grid: 4

end of program rwr

start of program derlb

forces (hartrees/bohr) : total

| atom | label | x             | y             | z             |
|------|-------|---------------|---------------|---------------|
| 1    | H25   | 1.570739E-04  | 8.424059E-05  | -7.381299E-05 |
| 2    | C1    | 3.186481E-04  | 2.333582E-04  | -4.029628E-04 |
| 3    | C2    | -4.969000E-04 | -1.767584E-04 | 2.013582E-04  |
| 4    | C3    | 5.982224E-04  | -2.945436E-04 | -4.549820E-04 |
| 5    | C4    | -6.454716E-04 | -1.267695E-04 | 6.634476E-04  |
| 6    | C5    | -1.455411E-04 | 3.567310E-04  | 7.264008E-05  |
| 7    | C6    | 3.202791E-04  | -2.516367E-04 | -2.954228E-04 |
| 8    | C7    | -3.911236E-04 | 6.651443E-04  | -3.578150E-04 |
| 9    | H27   | -4.182916E-05 | -1.428398E-04 | 1.918705E-05  |
| 10   | H28   | -1.778199E-04 | -4.945258E-05 | 2.082284E-04  |
| 11   | H30   | -4.020726E-05 | -5.756403E-05 | 2.784976E-05  |
| 12   | C8    | -5.462853E-04 | -4.611201E-04 | -9.405994E-04 |
| 13   | H32   | 2.674490E-04  | 2.811162E-04  | -6.183473E-05 |
| 14   | C10   | 7.834954E-04  | 3.322594E-05  | 4.515573E-04  |

|       |       |               |               |               |
|-------|-------|---------------|---------------|---------------|
| 15    | N2    | 7.767932E-04  | 3.637155E-04  | 3.509830E-04  |
| 16    | C9    | 1.694126E-03  | 2.552446E-04  | -8.182069E-05 |
| 17    | O1    | -1.554054E-03 | -1.060326E-03 | 4.584320E-04  |
| 18    | H43   | 4.465841E-04  | 1.287624E-04  | -6.478301E-05 |
| 19    | C12   | -5.266706E-04 | -5.829531E-04 | 9.650472E-04  |
| 20    | C11   | -1.024872E-04 | 7.583695E-04  | -2.155732E-04 |
| 21    | C18   | -2.878586E-04 | 1.661926E-04  | 3.783266E-04  |
| 22    | H48   | 2.116432E-04  | -1.094423E-04 | -6.231249E-04 |
| 23    | C13   | 1.454765E-04  | 6.164526E-05  | -6.507602E-05 |
| 24    | C14   | 3.927815E-04  | -1.460863E-04 | 2.194062E-04  |
| 25    | C15   | 1.443101E-04  | 1.834018E-04  | -4.120524E-04 |
| 26    | C16   | 1.106905E-04  | 7.025176E-05  | 1.362942E-04  |
| 27    | C17   | -4.213989E-04 | 1.387119E-04  | -1.546211E-04 |
| 28    | H51   | 1.690670E-04  | 5.178363E-05  | -2.218872E-05 |
| 29    | H52   | 1.136166E-04  | 6.716084E-05  | -4.154337E-06 |
| 30    | H55   | 3.284630E-06  | 6.966898E-05  | -2.961049E-05 |
| 31    | H56   | 1.932974E-04  | 9.192205E-05  | -4.268338E-05 |
| 32    | H59   | 1.447218E-04  | 2.944065E-05  | -1.282085E-04 |
| 33    | H60   | -1.445779E-04 | 2.787547E-04  | -1.360400E-04 |
| 34    | H61   | 4.126012E-04  | -7.978368E-05 | -1.786583E-04 |
| 35    | H62   | -3.748518E-04 | -3.139767E-04 | -1.249488E-04 |
| ----- |       |               |               |               |
|       | total | 1.507085E-03  | 5.155893E-04  | -7.182163E-04 |

end of program derlb

start of program geopt 16

geometry optimization step 16

reading input hessian of dimension 105

in five columns format

reading input hessian of dimension 105

in five columns format

Hessian eigenvalues:

|              |              |              |              |              |
|--------------|--------------|--------------|--------------|--------------|
| -4.38427E-01 | 0.000000E+00 | 0.000000E+00 | 0.000000E+00 | 0.000000E+00 |
| 0.000000E+00 | 0.000000E+00 | 0.000000E+00 | 0.000000E+00 | 0.000000E+00 |
| 0.000000E+00 | 0.000000E+00 | 0.000000E+00 | 0.000000E+00 | 0.000000E+00 |
| 0.000000E+00 | 0.000000E+00 | 0.000000E+00 | 0.000000E+00 | 0.000000E+00 |
| 0.000000E+00 | 0.000000E+00 | 0.000000E+00 | 0.000000E+00 | 0.000000E+00 |
| 0.000000E+00 | 0.000000E+00 | 1.63852E-03  | 4.69712E-03  | 2.10648E-02  |
| 2.15102E-02  | 2.80567E-02  | 2.90900E-02  | 3.05050E-02  | 3.06261E-02  |
| 3.17325E-02  | 3.72670E-02  | 3.84317E-02  | 4.43567E-02  | 4.77655E-02  |
| 6.14351E-02  | 6.76064E-02  | 7.07438E-02  | 7.26910E-02  | 7.47792E-02  |
| 8.39751E-02  | 8.81213E-02  | 9.68901E-02  | 1.04232E-01  | 1.10696E-01  |
| 1.12257E-01  | 1.29101E-01  | 1.32116E-01  | 1.37281E-01  | 1.42455E-01  |
| 1.44673E-01  | 1.49828E-01  | 1.53236E-01  | 1.56664E-01  | 1.65392E-01  |
| 1.66210E-01  | 1.76449E-01  | 1.81084E-01  | 1.86503E-01  | 1.87763E-01  |
| 1.99946E-01  | 2.05382E-01  | 2.12337E-01  | 2.14853E-01  | 2.17211E-01  |
| 2.24082E-01  | 2.30289E-01  | 2.31641E-01  | 2.38003E-01  | 2.46956E-01  |
| 2.57112E-01  | 2.61366E-01  | 2.66748E-01  | 2.72468E-01  | 2.79900E-01  |
| 2.92132E-01  | 2.98016E-01  | 3.01860E-01  | 3.09506E-01  | 3.13687E-01  |
| 3.17064E-01  | 3.21902E-01  | 3.25311E-01  | 3.28604E-01  | 3.33082E-01  |
| 3.36230E-01  | 3.37463E-01  | 3.46266E-01  | 3.51421E-01  | 3.56689E-01  |
| 3.58814E-01  | 3.64430E-01  | 3.73422E-01  | 3.80993E-01  | 3.89561E-01  |
| 3.98501E-01  | 4.03973E-01  | 4.13525E-01  | 4.19958E-01  | 4.23882E-01  |
| 4.33310E-01  | 4.47536E-01  | 4.50427E-01  | 4.57800E-01  | 4.67255E-01  |
| 4.79486E-01  | 5.00022E-01  | 5.06475E-01  | 5.12319E-01  | 5.30358E-01  |
| 5.69119E-01  | 5.93412E-01  | 6.20045E-01  | 6.54845E-01  | 7.21719E-01  |
| 7.35608E-01  | 7.54020E-01  | 8.18619E-01  | 1.05199E+00  | 1.49250E+00  |

WARNING: Hessian has wrong number of negative eigenvalues  
 WARNING: positive P-RFO shift not converged: using initial-guess shift

Level shifts adjusted to satisfy step-size constraints

Step size: 0.0750251

Cos(theta): 0.1128800

Final level shift: -4.4082528E-01

energy change: 2.0163E-07 ! ( 5.0000E-05 )

gradient maximum: 1.9857E-03 . ( 4.5000E-04 )

gradient rms: 3.7383E-04 . ( 3.0000E-04 )

step size: 0.07503 trust radius: 0.07500

displacement maximum: 2.6324E-02 . ( 1.8000E-03 )

displacement rms: 6.7104E-03 . ( 1.2000E-03 )

predicted energy change: -1.2583E-03 geom step: 7.5025E-02 full step:  
 7.5025E-02

molecular structure not yet converged...

center of mass moved by:

x: 5.3259E-04 y: 1.1815E-03 z: 2.6723E-03

new geometry:

|      | angstroms     |               |               |
|------|---------------|---------------|---------------|
| atom | x             | y             | z             |
| H25  | 0.9289584197  | -3.8896118279 | -2.2181338061 |
| C1   | 1.4943447819  | -2.9902717573 | -2.1748002361 |
| C2   | 3.0045499141  | -0.5995714175 | -2.0710983457 |
| C3   | 1.1472377419  | -1.9771282779 | -1.2951797558 |
| C4   | 2.5826381262  | -2.7945961631 | -2.9887733519 |
| C5   | 3.3276208327  | -1.6183629817 | -2.9350836699 |
| C6   | 1.9143345342  | -0.8039334713 | -1.2708367124 |
| C7   | 0.0771172003  | -1.8400623931 | -0.3003845095 |
| H27  | 2.8692958711  | -3.5637687145 | -3.6795090569 |
| H28  | 4.1743458393  | -1.5217667366 | -3.5876596717 |
| H30  | 3.5633387732  | 0.3033850213  | -2.0106191293 |
| C8   | 0.2390027606  | -0.6375437226 | 0.2669857332  |
| H32  | -0.6810454354 | -2.5563613245 | -0.0859189390 |
| C10  | -0.3759700394 | 0.2532772353  | 1.3145221304  |
| N2   | 1.3435970121  | 0.0022548278  | -0.3010169525 |
| C9   | 1.6450143655  | 1.2303194551  | 0.2409885441  |
| O1   | 2.5918995738  | 1.9174012940  | -0.0696289198 |
| H43  | -0.3532115848 | -0.2408631992 | 2.2839204722  |
| C12  | -1.8176115657 | 0.6223659547  | 0.9807619046  |
| C11  | 0.5915033106  | 1.4962278274  | 1.3260768549  |
| C18  | 1.3016969717  | 1.7291171271  | 2.6669559709  |
| H48  | 0.0511760374  | 2.3954376522  | 1.0680212327  |
| C13  | -3.4456611495 | 1.4045945394  | -0.5928361865 |
| C14  | -4.1355539217 | 0.8348959727  | 1.6261336407  |
| C15  | -4.4492366591 | 1.2880056812  | 0.3649499759  |
| C16  | -2.8264498641 | 0.5025933721  | 1.9297183894  |
| C17  | -2.1439142415 | 1.0734909458  | -0.2884747832 |
| H51  | -5.4628207751 | 1.5443898162  | 0.1173058585  |
| H52  | -2.5996009206 | 0.1318979101  | 2.9058886539  |
| H55  | -3.6845259432 | 1.7532818558  | -1.5819183038 |
| H56  | -4.9022207663 | 0.7363122460  | 2.3730346815  |
| H59  | -1.3880959164 | 1.1359441821  | -1.0548769048 |
| H60  | 1.8347948787  | 0.8336866210  | 2.9750604510  |
| H61  | 0.5829306047  | 1.9951590797  | 3.4326146022  |
| H62  | 2.0246703066  | 2.5331126107  | 2.5652961958  |



```

nuclear repulsion energy..... 1447.431432624 hartrees
-----
/  end of geometry optimization iteration 16  /
-----

end of program geopt

start of program onee
smallest eigenvalue of S:    1.178E-03
number of canonical orbitals.....      210
end of program onee

start of program probe
end of program probe

start of program grid

number of gridpoints:
  atom      H25      C1      C2      C3      C4      C5      C6      C7
grid # 1      73      89      89      90      87      87      84      85
grid # 2     106     99     99     98     98     98     91     92
grid # 3     224     183     182     194     182     182     185     183
grid # 4     224     376     379     404     379     379     368     376

number of gridpoints:
  atom      H27      H28      H30      C8      H32      C10      N2      C9
grid # 1      73      73      73      86      73      81      99      76
grid # 2     106     106     105     91     106     92     109     81
grid # 3     224     224     220     186     223     175     223     164
grid # 4     224     224     219     378     228     352     401     328

number of gridpoints:
  atom      O1      H43      C12      C11      C18      H48      C13      C14
grid # 1     111      69      90      81      72      68      86      87
grid # 2     127      98     106      94      74     100      98      99
grid # 3     272     208     193     173     139     216     183     183
grid # 4     473     201     401     358     308     205     380     380

number of gridpoints:
  atom      C15      C16      C17      H51      H52      H55      H56      H59
grid # 1      87      86      85      73      73      73      73      71
grid # 2      99      99      97     106     104     106     106     101
grid # 3     183     181     181     224     215     224     224     215
grid # 4     378     374     378     224     215     224     224     212

number of gridpoints:
  atom      H60      H61      H62  total
grid # 1      71      71      71   2816
grid # 2      99      99      99   3488
grid # 3     218     220     220   7026
grid # 4     218     223     221  10836

end of program grid

start of program rwr
recomputing RwR matrix   8    grid:  4
recomputing RwR matrix  15    grid:  4
recomputing RwR matrix  20    grid:  4

```

end of program rwr

start of program scf

|      | i | u | d | i | g |                  | energy   | RMS     | maximum |
|------|---|---|---|---|---|------------------|----------|---------|---------|
|      | t | p | i | c | r |                  | change   | density | DIIS    |
|      | e | d | i | u | i |                  |          | change  | error   |
|      | r | t | s | t | d | total energy     |          |         |         |
| etot | 1 | N | N | 1 | U | -815.14026970350 |          | 2.2E-04 | 2.9E-03 |
| etot | 2 | Y | Y | 4 | M | -815.14119249524 | 9.2E-04  | 5.7E-05 | 7.8E-04 |
| etot | 3 | Y | Y | 4 | M | -815.14126661934 | 7.4E-05  | 2.1E-05 | 2.3E-04 |
| etot | 4 | Y | Y | 4 | M | -815.14127482102 | 8.2E-06  | 9.1E-06 | 1.3E-04 |
| etot | 5 | Y | Y | 4 | M | -815.14127612194 | 1.3E-06  | 3.1E-06 | 5.7E-05 |
| etot | 6 | N | N | 1 | U | -815.14127287773 | -3.2E-06 | 0.0E+00 | 0.0E+00 |

Energy components, in hartrees:

|     |                               |                   |       |
|-----|-------------------------------|-------------------|-------|
| (A) | Nuclear repulsion.....        | 1447.43143262418  |       |
| (E) | Total one-electron terms..... | -3980.36089320291 |       |
| (I) | Total two-electron terms..... | 1717.78818770099  |       |
| (L) | Electronic energy.....        | -2262.57270550192 | (E+I) |
| (N) | Total energy.....             | -815.14127287773  | (A+L) |

SCFE: SCF energy: HF      -815.14127287773 hartrees      iterations:      6

HOMO energy:      -0.29650

LUMO energy:      0.11867

Orbital energies:

|           |           |           |           |           |           |
|-----------|-----------|-----------|-----------|-----------|-----------|
| -20.45196 | -15.55155 | -11.32147 | -11.23535 | -11.22123 | -11.21472 |
| -11.20698 | -11.20128 | -11.18660 | -11.18579 | -11.18507 | -11.18488 |
| -11.18335 | -11.18316 | -11.17631 | -11.17618 | -11.17596 | -11.17444 |
| -11.17368 | -11.17011 | -1.42208  | -1.33185  | -1.18123  | -1.16494  |
| -1.11605  | -1.08846  | -1.04153  | -1.02836  | -1.02267  | -1.00128  |
| -0.94695  | -0.90513  | -0.85536  | -0.84233  | -0.83187  | -0.81211  |
| -0.79365  | -0.76337  | -0.72062  | -0.69043  | -0.67805  | -0.66939  |
| -0.65829  | -0.64023  | -0.63968  | -0.62757  | -0.61493  | -0.60623  |
| -0.60339  | -0.60161  | -0.59274  | -0.57595  | -0.55838  | -0.55486  |
| -0.54064  | -0.53097  | -0.51587  | -0.50779  | -0.49971  | -0.49631  |
| -0.49237  | -0.48623  | -0.45925  | -0.42166  | -0.39443  | -0.35032  |
| -0.34233  | -0.31621  | -0.29650  | 0.11867   | 0.13518   | 0.14067   |
| 0.14374   | 0.20599   | 0.22547   | 0.26409   | 0.27116   | 0.27333   |
| 0.29998   |           |           |           |           |           |

end of program scf

start of program derla

end of program derla

start of program rwr

recomputing RwR matrix      8      grid:      4

recomputing RwR matrix      15      grid:      4

recomputing RwR matrix      20      grid:      4

end of program rwr

start of program derlb

forces (hartrees/bohr) : total

| atom  | label | x             | y             | z             |
|-------|-------|---------------|---------------|---------------|
| 1     | H25   | -3.182148E-03 | -5.791438E-03 | -3.936352E-04 |
| 2     | C1    | -2.321122E-03 | 5.052126E-03  | 3.465752E-03  |
| 3     | C2    | 4.985214E-03  | -6.294323E-04 | -4.848171E-03 |
| 4     | C3    | -3.677428E-03 | -3.088240E-03 | 3.616024E-04  |
| 5     | C4    | 4.019578E-03  | -4.644853E-03 | -5.577130E-03 |
| 6     | C5    | 7.804161E-03  | -2.687728E-03 | -8.144120E-03 |
| 7     | C6    | -1.176219E-02 | -3.702051E-04 | 1.317444E-02  |
| 8     | C7    | 2.484805E-03  | 2.257305E-03  | -9.894787E-04 |
| 9     | H27   | 3.935654E-04  | 7.974040E-04  | 2.343719E-04  |
| 10    | H28   | -6.752203E-04 | 1.681033E-03  | 1.141628E-03  |
| 11    | H30   | 1.944835E-03  | 3.987048E-03  | 8.797874E-04  |
| 12    | C8    | 1.566433E-03  | -6.168732E-04 | -2.276586E-03 |
| 13    | H32   | -1.949085E-04 | -5.757300E-04 | -2.101582E-04 |
| 14    | C10   | -1.542310E-03 | 9.756121E-04  | 6.581975E-03  |
| 15    | N2    | -1.891823E-03 | 4.503349E-03  | 2.165183E-03  |
| 16    | C9    | 2.833826E-03  | -1.791783E-03 | -1.270455E-03 |
| 17    | O1    | -2.257764E-03 | -4.319169E-04 | 9.756649E-04  |
| 18    | H43   | 7.666361E-04  | 2.155396E-03  | -3.362620E-03 |
| 19    | C12   | 5.204391E-04  | -3.314306E-03 | 4.799107E-03  |
| 20    | C11   | -1.429599E-03 | 1.611784E-03  | -1.297786E-03 |
| 21    | C18   | 3.812273E-03  | -1.900054E-03 | 1.936037E-03  |
| 22    | H48   | -1.073620E-03 | -3.762429E-04 | -2.596776E-03 |
| 23    | C13   | -6.806639E-03 | 3.036759E-03  | -2.746038E-03 |
| 24    | C14   | -1.247197E-03 | -1.561032E-04 | 2.630014E-03  |
| 25    | C15   | -9.456881E-04 | 2.937336E-03  | -7.667763E-03 |
| 26    | C16   | 6.114122E-03  | -9.035865E-04 | -1.798210E-03 |
| 27    | C17   | 1.803647E-03  | 7.835260E-05  | -5.156296E-03 |
| 28    | H51   | 2.126230E-03  | -2.731267E-04 | 1.046543E-04  |
| 29    | H52   | 2.296745E-03  | -4.690640E-04 | 3.202855E-03  |
| 30    | H55   | -2.388165E-04 | -1.162494E-03 | 2.589928E-03  |
| 31    | H56   | 1.920944E-03  | -2.049787E-04 | -1.432720E-03 |
| 32    | H59   | -2.090497E-03 | 3.601520E-04  | 4.299304E-03  |
| 33    | H60   | -1.326809E-03 | 1.365154E-03  | 4.705905E-04  |
| 34    | H61   | 5.680783E-04  | -2.392318E-04 | 2.841900E-04  |
| 35    | H62   | -2.137550E-03 | -1.323336E-03 | -1.465678E-04 |
| total |       | 1.160206E-03  | -1.519152E-04 | -6.174285E-04 |

end of program derlb

start of program geopt 17

geometry optimization step 17

reading input hessian of dimension 105  
in five columns format

reading input hessian of dimension 105  
in five columns format

\*\* restarting optimization from step 16 \*\*

Hessian eigenvalues:

|              |             |             |             |             |
|--------------|-------------|-------------|-------------|-------------|
| -3.30224E-02 | 0.00000E+00 | 0.00000E+00 | 0.00000E+00 | 0.00000E+00 |
| 0.00000E+00  | 0.00000E+00 | 0.00000E+00 | 0.00000E+00 | 0.00000E+00 |
| 0.00000E+00  | 0.00000E+00 | 0.00000E+00 | 0.00000E+00 | 0.00000E+00 |
| 0.00000E+00  | 0.00000E+00 | 0.00000E+00 | 0.00000E+00 | 0.00000E+00 |
| 0.00000E+00  | 0.00000E+00 | 0.00000E+00 | 0.00000E+00 | 0.00000E+00 |
| 0.00000E+00  | 0.00000E+00 | 1.69512E-03 | 7.38869E-03 | 1.97963E-02 |

|             |             |             |             |             |
|-------------|-------------|-------------|-------------|-------------|
| 2.40255E-02 | 2.81534E-02 | 3.00017E-02 | 3.03010E-02 | 3.09412E-02 |
| 3.18626E-02 | 3.70739E-02 | 4.39602E-02 | 4.61787E-02 | 5.03111E-02 |
| 5.72984E-02 | 6.73999E-02 | 6.76515E-02 | 7.22182E-02 | 7.46345E-02 |
| 7.87597E-02 | 9.39556E-02 | 9.89467E-02 | 1.05040E-01 | 1.10374E-01 |
| 1.12866E-01 | 1.26272E-01 | 1.36114E-01 | 1.42279E-01 | 1.43484E-01 |
| 1.47533E-01 | 1.52281E-01 | 1.54339E-01 | 1.56734E-01 | 1.67010E-01 |
| 1.72112E-01 | 1.78776E-01 | 1.82328E-01 | 1.89342E-01 | 1.96299E-01 |
| 2.01827E-01 | 2.04582E-01 | 2.12865E-01 | 2.17204E-01 | 2.18543E-01 |
| 2.29677E-01 | 2.31469E-01 | 2.38792E-01 | 2.46765E-01 | 2.52012E-01 |
| 2.54654E-01 | 2.64887E-01 | 2.70369E-01 | 2.78040E-01 | 2.87295E-01 |
| 2.96207E-01 | 3.00488E-01 | 3.01852E-01 | 3.13176E-01 | 3.17083E-01 |
| 3.21490E-01 | 3.25063E-01 | 3.28631E-01 | 3.29760E-01 | 3.32995E-01 |
| 3.36410E-01 | 3.42601E-01 | 3.47231E-01 | 3.50606E-01 | 3.55206E-01 |
| 3.64522E-01 | 3.71023E-01 | 3.79779E-01 | 3.85053E-01 | 3.86924E-01 |
| 3.98321E-01 | 4.05671E-01 | 4.12733E-01 | 4.15693E-01 | 4.29985E-01 |
| 4.32342E-01 | 4.42654E-01 | 4.55952E-01 | 4.64769E-01 | 4.74982E-01 |
| 4.84493E-01 | 4.93326E-01 | 5.00073E-01 | 5.24181E-01 | 5.32266E-01 |
| 5.56195E-01 | 5.89351E-01 | 6.13701E-01 | 6.59622E-01 | 7.18861E-01 |
| 7.35175E-01 | 7.53097E-01 | 7.89095E-01 | 1.02095E+00 | 1.45214E+00 |

WARNING: Hessian has wrong number of negative eigenvalues

Level shifts adjusted to satisfy step-size constraints

Step size: 0.0384194

Cos(theta): 0.6369791

Final level shift: -5.8782893E-02

energy change: 1.0430E-03 . ( 5.0000E-05 )

gradient maximum: 1.9857E-03 . ( 4.5000E-04 )

gradient rms: 3.7383E-04 . ( 3.0000E-04 )

step size: 0.03842 trust radius: 0.03750

displacement maximum: 1.6279E-02 . ( 1.8000E-03 )

displacement rms: 3.4363E-03 . ( 1.2000E-03 )

predicted energy change: -9.4525E-05 geom step: 3.8419E-02 full step:  
3.8419E-02

molecular structure not yet converged...

center of mass moved by:

x: 5.5511E-16 y: 6.7654E-17 z: 0.0000E+00

new geometry:

|      | angstroms     |               |               |
|------|---------------|---------------|---------------|
| atom | x             | y             | z             |
| H25  | 0.9366700265  | -3.9028853138 | -2.2395394086 |
| C1   | 1.5069057822  | -2.9971821045 | -2.1849638552 |
| C2   | 3.0294826243  | -0.6183687952 | -2.0598321763 |
| C3   | 1.1504306666  | -1.9883581843 | -1.2992595500 |
| C4   | 2.6112661450  | -2.8091220300 | -2.9950763652 |
| C5   | 3.3653553283  | -1.6338300482 | -2.9322984229 |
| C6   | 1.9214507868  | -0.8175023480 | -1.2593138203 |
| C7   | 0.0764887917  | -1.8417493392 | -0.3125367242 |
| H27  | 2.8989966587  | -3.5772712427 | -3.6848053574 |
| H28  | 4.2177901721  | -1.5208170856 | -3.5724712024 |
| H30  | 3.5879590716  | 0.2908371635  | -1.9848815326 |
| C8   | 0.2356070138  | -0.6383446340 | 0.2547140938  |
| H32  | -0.6859415929 | -2.5561157505 | -0.1020242072 |
| C10  | -0.3827821520 | 0.2582575353  | 1.3010474292  |
| N2   | 1.3442416754  | -0.0011500289 | -0.3029545504 |
| C9   | 1.6459387900  | 1.2249699857  | 0.2371143694  |
| O1   | 2.5928586189  | 1.9128395940  | -0.0666879556 |

|     |               |               |               |
|-----|---------------|---------------|---------------|
| H43 | -0.3525184792 | -0.2296284341 | 2.2672883663  |
| C12 | -1.8221273467 | 0.6214821012  | 0.9736893717  |
| C11 | 0.5809594090  | 1.4999506116  | 1.3084109837  |
| C18 | 1.2789642592  | 1.7298375173  | 2.6602677778  |
| H48 | 0.0391150596  | 2.3934799853  | 1.0290076738  |
| C13 | -3.4747845612 | 1.4274314607  | -0.5784381618 |
| C14 | -4.1249974144 | 0.8404140569  | 1.6492311931  |
| C15 | -4.4596546821 | 1.3054403340  | 0.3919218549  |
| C16 | -2.8108571434 | 0.5005304742  | 1.9369405011  |
| C17 | -2.1675703461 | 1.0862517119  | -0.2901958985 |
| H51 | -5.4743817027 | 1.5654776057  | 0.1646351151  |
| H52 | -2.5613805407 | 0.1354054548  | 2.9147477621  |
| H55 | -3.7287868297 | 1.7809287152  | -1.5580405409 |
| H56 | -4.8791327135 | 0.7371264847  | 2.4041554071  |
| H59 | -1.4157089849 | 1.1633393770  | -1.0506936544 |
| H60 | 1.7993760625  | 0.8335883575  | 2.9776351844  |
| H61 | 0.5538583128  | 1.9989026916  | 3.4183483372  |
| H62 | 2.0009221680  | 2.5310268886  | 2.5658389805  |

nuclear repulsion energy..... 1445.508147999 hartrees

-----  
 / end of geometry optimization iteration 17 /  
 -----

end of program geopt

start of program onee  
 smallest eigenvalue of S: 1.214E-03  
 number of canonical orbitals..... 210  
 end of program onee

start of program probe  
 end of program probe

start of program grid

number of gridpoints:

| atom     | H25 | C1  | C2  | C3  | C4  | C5  | C6  | C7  |
|----------|-----|-----|-----|-----|-----|-----|-----|-----|
| grid # 1 | 73  | 89  | 87  | 90  | 87  | 87  | 85  | 85  |
| grid # 2 | 106 | 100 | 97  | 98  | 98  | 98  | 91  | 92  |
| grid # 3 | 224 | 183 | 182 | 194 | 182 | 182 | 187 | 183 |
| grid # 4 | 224 | 379 | 381 | 406 | 379 | 379 | 372 | 378 |

number of gridpoints:

| atom     | H27 | H28 | H30 | C8  | H32 | C10 | N2  | C9  |
|----------|-----|-----|-----|-----|-----|-----|-----|-----|
| grid # 1 | 73  | 73  | 73  | 86  | 73  | 82  | 100 | 76  |
| grid # 2 | 106 | 106 | 105 | 91  | 106 | 92  | 109 | 80  |
| grid # 3 | 224 | 224 | 220 | 188 | 223 | 175 | 223 | 164 |
| grid # 4 | 224 | 224 | 219 | 374 | 228 | 351 | 402 | 332 |

number of gridpoints:

| atom     | O1  | H43 | C12 | C11 | C18 | H48 | C13 | C14 |
|----------|-----|-----|-----|-----|-----|-----|-----|-----|
| grid # 1 | 111 | 69  | 90  | 81  | 71  | 70  | 88  | 87  |
| grid # 2 | 127 | 98  | 105 | 93  | 78  | 99  | 100 | 100 |
| grid # 3 | 272 | 209 | 194 | 171 | 150 | 215 | 183 | 183 |
| grid # 4 | 473 | 200 | 400 | 352 | 306 | 208 | 379 | 379 |

number of gridpoints:

| atom | C15 | C16 | C17 | H51 | H52 | H55 | H56 | H59 |
|------|-----|-----|-----|-----|-----|-----|-----|-----|
|------|-----|-----|-----|-----|-----|-----|-----|-----|

|          |     |     |     |     |     |     |     |     |
|----------|-----|-----|-----|-----|-----|-----|-----|-----|
| grid # 1 | 89  | 87  | 86  | 73  | 73  | 73  | 73  | 70  |
| grid # 2 | 100 | 100 | 97  | 106 | 104 | 106 | 106 | 101 |
| grid # 3 | 183 | 182 | 181 | 224 | 214 | 224 | 224 | 215 |
| grid # 4 | 379 | 377 | 376 | 224 | 214 | 224 | 224 | 212 |

number of gridpoints:

|          |     |     |     |       |
|----------|-----|-----|-----|-------|
| atom     | H60 | H61 | H62 | total |
| grid # 1 | 71  | 71  | 71  | 2823  |
| grid # 2 | 99  | 99  | 99  | 3492  |
| grid # 3 | 217 | 220 | 220 | 7039  |
| grid # 4 | 218 | 222 | 221 | 10840 |

end of program grid

start of program rwr

recomputing RwR matrix 15 grid: 4

end of program rwr

start of program scf

|      | i | u | d | i | g |                  |               | RMS     | maximum |
|------|---|---|---|---|---|------------------|---------------|---------|---------|
|      | t | p | i | c | r |                  |               | energy  | DIIS    |
|      | e | d | i | u | i |                  |               | density | error   |
|      | r | t | s | t | d | total energy     | energy change | change  |         |
| etot | 1 | N | N | 2 | U | -815.14120544926 |               | 2.3E-04 | 3.7E-03 |
| etot | 2 | Y | Y | 6 | M | -815.14229963769 | 1.1E-03       | 6.8E-05 | 1.3E-03 |
| etot | 3 | Y | Y | 6 | M | -815.14240063709 | 1.0E-04       | 2.4E-05 | 4.4E-04 |
| etot | 4 | Y | Y | 6 | M | -815.14240333278 | 2.7E-06       | 1.1E-05 | 2.0E-04 |
| etot | 5 | Y | Y | 6 | M | -815.14240719045 | 3.9E-06       | 3.5E-06 | 6.9E-05 |
| etot | 6 | N | N | 2 | U | -815.14262970700 | 2.2E-04       | 0.0E+00 | 0.0E+00 |

Energy components, in hartrees:

|     |                               |                   |       |
|-----|-------------------------------|-------------------|-------|
| (A) | Nuclear repulsion.....        | 1445.50814799889  |       |
| (E) | Total one-electron terms..... | -3976.50431503215 |       |
| (I) | Total two-electron terms..... | 1715.85353732626  |       |
| (L) | Electronic energy.....        | -2260.65077770589 | (E+I) |
| (N) | Total energy.....             | -815.14262970700  | (A+L) |

SCFE: SCF energy: HF -815.14262970700 hartrees iterations: 6

HOMO energy: -0.29660

LUMO energy: 0.11827

Orbital energies:

|           |           |           |           |           |           |
|-----------|-----------|-----------|-----------|-----------|-----------|
| -20.45241 | -15.55235 | -11.32149 | -11.23574 | -11.22249 | -11.21378 |
| -11.20699 | -11.20081 | -11.18761 | -11.18627 | -11.18565 | -11.18524 |
| -11.18376 | -11.18345 | -11.17895 | -11.17681 | -11.17673 | -11.17583 |
| -11.17543 | -11.17236 | -1.42333  | -1.33325  | -1.18061  | -1.16251  |
| -1.11557  | -1.08822  | -1.04112  | -1.02763  | -1.02001  | -1.00039  |
| -0.94700  | -0.90592  | -0.85530  | -0.84384  | -0.83145  | -0.81100  |
| -0.79421  | -0.76208  | -0.72102  | -0.69044  | -0.67884  | -0.66920  |
| -0.65830  | -0.64099  | -0.64008  | -0.62707  | -0.61164  | -0.60601  |
| -0.60393  | -0.60148  | -0.59206  | -0.57692  | -0.55876  | -0.55525  |
| -0.54073  | -0.53131  | -0.51658  | -0.50792  | -0.49980  | -0.49646  |
| -0.49121  | -0.48642  | -0.45918  | -0.42193  | -0.39339  | -0.34963  |
| -0.34267  | -0.31518  | -0.29660  | 0.11827   | 0.13410   | 0.13925   |
| 0.14317   | 0.20544   | 0.22574   | 0.26458   | 0.27088   | 0.27330   |

0.29963

end of program scf

start of program derla

end of program derla

start of program rwr

recomputing RwR matrix 4 grid: 4

recomputing RwR matrix 15 grid: 4

end of program rwr

start of program derlb

forces (hartrees/bohr) : total

| atom  | label | x             | y             | z             |
|-------|-------|---------------|---------------|---------------|
| 1     | H25   | 6.085692E-06  | -1.870643E-04 | -6.898939E-05 |
| 2     | C1    | 4.497896E-04  | 3.693031E-05  | -6.479080E-04 |
| 3     | C2    | -3.008053E-04 | -9.938999E-05 | 9.608955E-05  |
| 4     | C3    | 2.290085E-04  | -6.235991E-04 | -4.483329E-04 |
| 5     | C4    | -7.277382E-04 | -4.840529E-04 | 4.870225E-04  |
| 6     | C5    | 3.830313E-04  | 4.777196E-04  | -2.406587E-04 |
| 7     | C6    | 8.063741E-04  | 3.080345E-04  | -1.094578E-04 |
| 8     | C7    | -5.588610E-04 | 4.097632E-04  | -1.487481E-04 |
| 9     | H27   | -7.626640E-05 | -8.842524E-05 | 5.492422E-05  |
| 10    | H28   | -2.966574E-04 | 2.174867E-05  | 2.725932E-04  |
| 11    | H30   | -2.628459E-05 | -2.380873E-05 | 1.481522E-05  |
| 12    | C8    | -4.066106E-04 | -1.098953E-05 | -6.154393E-04 |
| 13    | H32   | 1.157067E-04  | 1.180615E-04  | -1.226810E-04 |
| 14    | C10   | 6.138316E-04  | -1.386863E-04 | 4.346157E-04  |
| 15    | N2    | 3.039157E-04  | -2.206831E-04 | 3.022041E-04  |
| 16    | C9    | 5.577019E-04  | 1.789495E-04  | 1.913350E-04  |
| 17    | O1    | -2.871064E-04 | -2.200467E-04 | 1.093937E-04  |
| 18    | H43   | 2.896994E-04  | 2.366219E-04  | -2.728419E-04 |
| 19    | C12   | -4.171111E-04 | -5.881082E-04 | 9.312531E-04  |
| 20    | C11   | -4.267134E-04 | 6.398246E-04  | -9.444764E-05 |
| 21    | C18   | -1.249866E-04 | 2.313846E-04  | -1.354948E-04 |
| 22    | H48   | 2.838656E-04  | -4.349902E-04 | -5.523851E-04 |
| 23    | C13   | -2.362666E-05 | 7.797889E-05  | -4.267742E-06 |
| 24    | C14   | 3.430857E-04  | -9.157796E-06 | 3.993001E-05  |
| 25    | C15   | 1.115285E-04  | 1.055584E-04  | -2.743753E-04 |
| 26    | C16   | 1.304467E-04  | 2.060837E-04  | -2.861160E-05 |
| 27    | C17   | -3.363183E-04 | 7.343606E-05  | 7.102319E-05  |
| 28    | H51   | 2.406432E-04  | 3.318046E-05  | 8.640545E-06  |
| 29    | H52   | 9.783412E-05  | 7.271221E-05  | -1.484886E-04 |
| 30    | H55   | 5.889580E-05  | -1.140713E-05 | 1.158138E-04  |
| 31    | H56   | 1.569552E-04  | 6.378854E-05  | -6.130711E-05 |
| 32    | H59   | 1.055457E-04  | 2.731150E-05  | -1.010497E-04 |
| 33    | H60   | 1.038272E-04  | -1.246032E-04 | -3.867003E-05 |
| 34    | H61   | -1.662217E-04 | 8.213011E-05  | 1.647212E-04  |
| 35    | H62   | -3.450816E-05 | -2.187049E-05 | -1.262760E-04 |
| total |       | 1.177956E-03  | 1.143351E-04  | -9.460558E-04 |

end of program derlb

start of program geopt 18

geometry optimization step 18

reading input hessian of dimension 105

in five columns format

reading input hessian of dimension 105

in five columns format

Hessian eigenvalues:

|              |             |             |             |             |
|--------------|-------------|-------------|-------------|-------------|
| -3.30199E-02 | 0.00000E+00 | 0.00000E+00 | 0.00000E+00 | 0.00000E+00 |
| 0.00000E+00  | 0.00000E+00 | 0.00000E+00 | 0.00000E+00 | 0.00000E+00 |
| 0.00000E+00  | 0.00000E+00 | 0.00000E+00 | 0.00000E+00 | 0.00000E+00 |
| 0.00000E+00  | 0.00000E+00 | 0.00000E+00 | 0.00000E+00 | 0.00000E+00 |
| 0.00000E+00  | 0.00000E+00 | 0.00000E+00 | 0.00000E+00 | 0.00000E+00 |
| 0.00000E+00  | 0.00000E+00 | 1.69451E-03 | 7.38841E-03 | 1.97961E-02 |
| 2.40257E-02  | 2.81534E-02 | 3.00017E-02 | 3.03009E-02 | 3.09412E-02 |
| 3.18626E-02  | 3.70739E-02 | 4.39602E-02 | 4.61783E-02 | 5.03112E-02 |
| 5.72984E-02  | 6.73999E-02 | 6.76516E-02 | 7.22182E-02 | 7.46345E-02 |
| 7.87596E-02  | 9.39550E-02 | 9.89470E-02 | 1.05041E-01 | 1.10374E-01 |
| 1.12866E-01  | 1.26272E-01 | 1.36114E-01 | 1.42279E-01 | 1.43484E-01 |
| 1.47531E-01  | 1.52280E-01 | 1.54339E-01 | 1.56733E-01 | 1.67009E-01 |
| 1.72113E-01  | 1.78777E-01 | 1.82328E-01 | 1.89341E-01 | 1.96299E-01 |
| 2.01827E-01  | 2.04582E-01 | 2.12865E-01 | 2.17204E-01 | 2.18543E-01 |
| 2.29677E-01  | 2.31469E-01 | 2.38791E-01 | 2.46765E-01 | 2.52012E-01 |
| 2.54654E-01  | 2.64886E-01 | 2.70369E-01 | 2.78039E-01 | 2.87293E-01 |
| 2.96206E-01  | 3.00488E-01 | 3.01852E-01 | 3.13175E-01 | 3.17083E-01 |
| 3.21490E-01  | 3.25063E-01 | 3.28631E-01 | 3.29758E-01 | 3.32995E-01 |
| 3.36409E-01  | 3.42600E-01 | 3.47231E-01 | 3.50606E-01 | 3.55206E-01 |
| 3.64522E-01  | 3.71023E-01 | 3.79779E-01 | 3.85053E-01 | 3.86923E-01 |
| 3.98320E-01  | 4.05670E-01 | 4.12734E-01 | 4.15693E-01 | 4.29985E-01 |
| 4.32342E-01  | 4.42654E-01 | 4.55951E-01 | 4.64768E-01 | 4.74982E-01 |
| 4.84493E-01  | 4.93325E-01 | 5.00072E-01 | 5.24180E-01 | 5.32266E-01 |
| 5.56194E-01  | 5.89350E-01 | 6.13695E-01 | 6.59623E-01 | 7.18861E-01 |
| 7.35167E-01  | 7.53095E-01 | 7.89091E-01 | 1.02095E+00 | 1.45214E+00 |

WARNING: Hessian has wrong number of negative eigenvalues

Level shifts adjusted to satisfy step-size constraints

Step size: 0.0750317

Cos(theta): 0.6314568

Final level shift: -4.3557486E-02

energy change: -3.1378E-04 . ( 5.0000E-05 )

gradient maximum: 1.1946E-03 . ( 4.5000E-04 )

gradient rms: 3.0204E-04 . ( 3.0000E-04 )

step size: 0.07503 trust radius: 0.07500

displacement maximum: 2.4933E-02 . ( 1.8000E-03 )

displacement rms: 6.7110E-03 . ( 1.2000E-03 )

predicted energy change: -2.0261E-04 geom step: 7.5032E-02 full step:  
7.5032E-02

molecular structure not yet converged...

center of mass moved by:

x: 8.3122E-03 y: -6.7724E-03 z: 2.2632E-03

new geometry:

|      | angstroms    |               |               |
|------|--------------|---------------|---------------|
| atom | x            | y             | z             |
| H25  | 0.9509812428 | -3.9122830054 | -2.2518427039 |
| Cl   | 1.5218481426 | -3.0044329004 | -2.1948050359 |



|     |               |               |               |
|-----|---------------|---------------|---------------|
| C2  | 3.0476768605  | -0.6260318891 | -2.0537237868 |
| C3  | 1.1662190151  | -1.9988511911 | -1.3059426769 |
| C4  | 2.6231306466  | -2.8127057375 | -2.9997011658 |
| C5  | 3.3765948096  | -1.6337231631 | -2.9322049642 |
| C6  | 1.9411808324  | -0.8292695008 | -1.2526564701 |
| C7  | 0.0795537749  | -1.8455278126 | -0.3361182295 |
| H27 | 2.9123590680  | -3.5758108679 | -3.6935544192 |
| H28 | 4.2211956957  | -1.5084378066 | -3.5756498440 |
| H30 | 3.6093967045  | 0.2794460956  | -1.9783296869 |
| C8  | 0.2347237855  | -0.6433130655 | 0.2377984531  |
| H32 | -0.6919701087 | -2.5552966949 | -0.1459483408 |
| C10 | -0.3913884882 | 0.2470690004  | 1.2836901829  |
| N2  | 1.3490357641  | -0.0112633259 | -0.3060157452 |
| C9  | 1.6455918475  | 1.2189176093  | 0.2386763323  |
| O1  | 2.6066737330  | 1.8974831438  | -0.0461581347 |
| H43 | -0.3676198389 | -0.2448480866 | 2.2452738844  |
| C12 | -1.8303705291 | 0.6189500249  | 0.9634802027  |
| C11 | 0.5675903235  | 1.4933489759  | 1.2960669082  |
| C18 | 1.2381113786  | 1.7466876346  | 2.6551690571  |
| H48 | 0.0209546187  | 2.3748701014  | 0.9916051162  |
| C13 | -3.4968309171 | 1.4434139296  | -0.5615551419 |
| C14 | -4.1144339896 | 0.8654650391  | 1.6743360392  |
| C15 | -4.4652996310 | 1.3328820081  | 0.4224094422  |
| C16 | -2.8034809368 | 0.5108228470  | 1.9404694615  |
| C17 | -2.1907295212 | 1.0877996300  | -0.2944947812 |
| H51 | -5.4798255663 | 1.6045590611  | 0.2128771549  |
| H52 | -2.5405817363 | 0.1443590370  | 2.9143181177  |
| H55 | -3.7604936743 | 1.7981964911  | -1.5370523238 |
| H56 | -4.8576082491 | 0.7682975661  | 2.4427560734  |
| H59 | -1.4512211253 | 1.1654238522  | -1.0707686956 |
| H60 | 1.7613145438  | 0.8599251247  | 2.9975344820  |
| H61 | 0.4931838744  | 2.0201254508  | 3.3941462487  |
| H62 | 1.9545992533  | 2.5543799056  | 2.5649786060  |

nuclear repulsion energy..... 1444.793128394 hartrees

/ end of geometry optimization iteration 18 /

end of program geopt

start of program onee

smallest eigenvalue of S: 1.207E-03

number of canonical orbitals..... 210

end of program onee

start of program probe

end of program probe

start of program grid

number of gridpoints:

| atom     | H25 | C1  | C2  | C3  | C4  | C5  | C6  | C7  |
|----------|-----|-----|-----|-----|-----|-----|-----|-----|
| grid # 1 | 73  | 89  | 87  | 90  | 87  | 87  | 84  | 85  |
| grid # 2 | 106 | 99  | 98  | 98  | 98  | 99  | 91  | 92  |
| grid # 3 | 224 | 183 | 182 | 195 | 182 | 182 | 187 | 182 |
| grid # 4 | 224 | 379 | 381 | 402 | 379 | 377 | 374 | 377 |

number of gridpoints:

|          |     |     |     |     |     |     |     |     |
|----------|-----|-----|-----|-----|-----|-----|-----|-----|
| atom     | H27 | H28 | H30 | C8  | H32 | C10 | N2  | C9  |
| grid # 1 | 73  | 73  | 73  | 86  | 73  | 81  | 99  | 77  |
| grid # 2 | 106 | 106 | 105 | 91  | 106 | 92  | 109 | 81  |
| grid # 3 | 224 | 224 | 220 | 190 | 223 | 175 | 223 | 165 |
| grid # 4 | 224 | 224 | 219 | 372 | 229 | 351 | 402 | 330 |

number of gridpoints:

|          |     |     |     |     |     |     |     |     |
|----------|-----|-----|-----|-----|-----|-----|-----|-----|
| atom     | O1  | H43 | C12 | C11 | C18 | H48 | C13 | C14 |
| grid # 1 | 111 | 68  | 90  | 81  | 71  | 69  | 86  | 87  |
| grid # 2 | 127 | 98  | 105 | 93  | 78  | 99  | 99  | 99  |
| grid # 3 | 272 | 209 | 193 | 171 | 149 | 216 | 183 | 183 |
| grid # 4 | 474 | 200 | 400 | 353 | 307 | 208 | 379 | 379 |

number of gridpoints:

|          |     |     |     |     |     |     |     |     |
|----------|-----|-----|-----|-----|-----|-----|-----|-----|
| atom     | C15 | C16 | C17 | H51 | H52 | H55 | H56 | H59 |
| grid # 1 | 89  | 85  | 85  | 73  | 73  | 73  | 73  | 70  |
| grid # 2 | 100 | 99  | 98  | 106 | 104 | 106 | 106 | 101 |
| grid # 3 | 183 | 182 | 181 | 224 | 214 | 224 | 224 | 216 |
| grid # 4 | 379 | 378 | 378 | 224 | 214 | 224 | 224 | 214 |

number of gridpoints:

|          |     |     |     |       |
|----------|-----|-----|-----|-------|
| atom     | H60 | H61 | H62 | total |
| grid # 1 | 71  | 71  | 71  | 2814  |
| grid # 2 | 99  | 99  | 99  | 3492  |
| grid # 3 | 217 | 220 | 220 | 7042  |
| grid # 4 | 218 | 222 | 221 | 10840 |

end of program grid

start of program rwr

recomputing RwR matrix 14 grid: 4

recomputing RwR matrix 15 grid: 4

end of program rwr

start of program scf

|      | i | u | d | i | g |                  |         | RMS     | maximum |
|------|---|---|---|---|---|------------------|---------|---------|---------|
|      | t | p | i | c | r |                  |         | density | DIIS    |
|      | e | d | i | u | i |                  | energy  | change  | error   |
|      | r | t | s | t | d | total energy     | change  |         |         |
| etot | 1 | N | N | 1 | U | -815.14043509785 |         | 2.1E-04 | 4.3E-03 |
| etot | 2 | Y | Y | 4 | M | -815.14213811498 | 1.7E-03 | 8.0E-05 | 1.1E-03 |
| etot | 3 | Y | Y | 4 | M | -815.14231624065 | 1.8E-04 | 2.8E-05 | 3.5E-04 |
| etot | 4 | Y | Y | 4 | M | -815.14233004633 | 1.4E-05 | 1.1E-05 | 1.8E-04 |
| etot | 5 | Y | Y | 4 | M | -815.14233439363 | 4.3E-06 | 4.2E-06 | 6.0E-05 |
| etot | 6 | N | N | 1 | U | -815.14234091476 | 6.5E-06 | 0.0E+00 | 0.0E+00 |

Energy components, in hartrees:

|     |                               |                   |       |
|-----|-------------------------------|-------------------|-------|
| (A) | Nuclear repulsion.....        | 1444.79312839407  |       |
| (E) | Total one-electron terms..... | -3975.06978645940 |       |
| (I) | Total two-electron terms..... | 1715.13431715058  |       |
| (L) | Electronic energy.....        | -2259.93546930882 | (E+I) |
| (N) | Total energy.....             | -815.14234091476  | (A+L) |

SCFE: SCF energy: HF -815.14234091476 hartrees iterations: 6

HOMO energy: -0.29618

LUMO energy: 0.11872

Orbital energies:

|           |           |           |           |           |           |
|-----------|-----------|-----------|-----------|-----------|-----------|
| -20.45306 | -15.55236 | -11.32226 | -11.23522 | -11.22226 | -11.21364 |
| -11.20723 | -11.20068 | -11.18694 | -11.18573 | -11.18533 | -11.18483 |
| -11.18398 | -11.18314 | -11.17846 | -11.17621 | -11.17614 | -11.17584 |
| -11.17459 | -11.17186 | -1.42269  | -1.33304  | -1.18159  | -1.16298  |
| -1.11610  | -1.08726  | -1.04156  | -1.02859  | -1.02046  | -1.00066  |
| -0.94687  | -0.90625  | -0.85469  | -0.84401  | -0.83178  | -0.81095  |
| -0.79459  | -0.76228  | -0.72127  | -0.69118  | -0.67878  | -0.66931  |
| -0.65802  | -0.64066  | -0.64034  | -0.62665  | -0.61176  | -0.60624  |
| -0.60416  | -0.60173  | -0.59175  | -0.57760  | -0.55842  | -0.55580  |
| -0.54063  | -0.53153  | -0.51687  | -0.50826  | -0.49966  | -0.49679  |
| -0.49101  | -0.48629  | -0.45950  | -0.42254  | -0.39310  | -0.35050  |
| -0.34283  | -0.31507  | -0.29618  | 0.11872   | 0.13415   | 0.13946   |
| 0.14352   | 0.20539   | 0.22565   | 0.26443   | 0.27131   | 0.27359   |
| 0.29899   |           |           |           |           |           |

end of program scf

start of program derla  
end of program derla

start of program rwr  
recomputing RWR matrix 4 grid: 4  
recomputing RWR matrix 14 grid: 4  
recomputing RWR matrix 15 grid: 4  
end of program rwr

start of program derlb

forces (hartrees/bohr) : total

| atom | label | x             | y             | z             |
|------|-------|---------------|---------------|---------------|
| 1    | H25   | 6.429836E-04  | 1.435730E-03  | -1.663890E-04 |
| 2    | C1    | -2.208926E-03 | -2.243559E-03 | 1.324801E-03  |
| 3    | C2    | -8.988649E-04 | 2.781811E-04  | 1.396494E-03  |
| 4    | C3    | -4.144242E-04 | 2.861408E-03  | 1.265476E-03  |
| 5    | C4    | 3.237553E-03  | 1.537947E-03  | -2.006512E-03 |
| 6    | C5    | -4.954327E-04 | -2.223491E-03 | -7.544223E-04 |
| 7    | C6    | -2.640582E-03 | 2.691410E-04  | -8.081468E-04 |
| 8    | C7    | -1.417013E-03 | -1.301908E-04 | 5.456034E-04  |
| 9    | H27   | 1.117215E-04  | -3.039393E-04 | -3.442256E-04 |
| 10   | H28   | 1.631160E-03  | -9.132043E-04 | -1.165032E-03 |
| 11   | H30   | 1.230044E-04  | 1.133578E-03  | 3.495599E-04  |
| 12   | C8    | -2.306530E-03 | -2.755663E-03 | -2.467396E-03 |
| 13   | H32   | 1.608802E-05  | -1.284916E-04 | 6.884732E-04  |
| 14   | C10   | 5.424433E-04  | 1.636204E-03  | -1.655539E-03 |
| 15   | N2    | 3.614240E-03  | 3.362112E-03  | 1.385707E-03  |
| 16   | C9    | 4.902873E-03  | -3.357420E-03 | 6.457833E-04  |
| 17   | O1    | -3.287106E-03 | -7.217628E-04 | 3.544385E-04  |
| 18   | H43   | 1.339537E-03  | -3.117824E-04 | 1.444795E-03  |
| 19   | C12   | 1.585453E-03  | -8.319603E-04 | -6.841584E-04 |
| 20   | C11   | -9.709603E-04 | 5.381427E-04  | -2.004648E-03 |
| 21   | C18   | -3.120061E-05 | 6.712524E-04  | 1.031769E-03  |
| 22   | H48   | 6.076200E-05  | 6.240473E-04  | 3.244456E-04  |
| 23   | C13   | 3.292338E-05  | 1.587924E-04  | -1.303306E-03 |
| 24   | C14   | -3.509863E-03 | -1.132091E-04 | 1.100372E-03  |

|       |       |               |               |               |
|-------|-------|---------------|---------------|---------------|
| 25    | C15   | -1.313179E-03 | 9.458745E-05  | 1.293462E-03  |
| 26    | C16   | 9.737429E-04  | -6.883449E-04 | 1.917243E-03  |
| 27    | C17   | 3.364401E-03  | 2.281349E-04  | -1.625091E-03 |
| 28    | H51   | -4.635873E-04 | 1.383733E-04  | -1.360200E-04 |
| 29    | H52   | -2.227883E-04 | 4.287965E-05  | -1.031691E-04 |
| 30    | H55   | -3.002464E-04 | 4.059049E-04  | -4.943533E-04 |
| 31    | H56   | 6.060196E-04  | 4.676608E-04  | -8.768542E-04 |
| 32    | H59   | -7.156723E-04 | -8.402087E-04 | 1.788917E-03  |
| 33    | H60   | -4.512960E-04 | 4.633384E-04  | -5.182050E-04 |
| 34    | H61   | 7.150803E-04  | -1.740271E-04 | -1.722258E-04 |
| 35    | H62   | -3.986130E-04 | -4.801328E-04 | -1.448087E-04 |
| ----- |       |               |               |               |
|       | total | 1.453700E-03  | 1.300279E-04  | -5.731622E-04 |

end of program derlb

start of program geopt 19

geometry optimization step 19  
 reading input hessian of dimension 105  
 in five columns format  
 reading input hessian of dimension 105  
 in five columns format  
 \*\* restarting optimization from step 18 \*\*

Hessian eigenvalues:

|              |             |             |             |             |
|--------------|-------------|-------------|-------------|-------------|
| -1.30845E-02 | 0.00000E+00 | 0.00000E+00 | 0.00000E+00 | 0.00000E+00 |
| 0.00000E+00  | 0.00000E+00 | 0.00000E+00 | 0.00000E+00 | 0.00000E+00 |
| 0.00000E+00  | 0.00000E+00 | 0.00000E+00 | 0.00000E+00 | 0.00000E+00 |
| 0.00000E+00  | 0.00000E+00 | 0.00000E+00 | 0.00000E+00 | 0.00000E+00 |
| 0.00000E+00  | 0.00000E+00 | 0.00000E+00 | 0.00000E+00 | 0.00000E+00 |
| 0.00000E+00  | 0.00000E+00 | 2.21695E-03 | 1.36849E-02 | 2.02633E-02 |
| 2.58333E-02  | 2.84407E-02 | 2.89538E-02 | 3.03762E-02 | 3.08352E-02 |
| 3.25410E-02  | 3.71636E-02 | 4.04608E-02 | 4.29866E-02 | 4.90003E-02 |
| 5.81243E-02  | 6.78499E-02 | 7.01367E-02 | 7.40998E-02 | 7.58770E-02 |
| 8.00100E-02  | 8.72603E-02 | 9.41555E-02 | 9.73942E-02 | 1.10007E-01 |
| 1.12446E-01  | 1.23337E-01 | 1.29097E-01 | 1.31601E-01 | 1.41646E-01 |
| 1.42927E-01  | 1.47076E-01 | 1.51928E-01 | 1.54618E-01 | 1.59488E-01 |
| 1.66977E-01  | 1.72837E-01 | 1.82558E-01 | 1.85950E-01 | 1.87486E-01 |
| 2.00251E-01  | 2.03410E-01 | 2.06170E-01 | 2.12368E-01 | 2.16128E-01 |
| 2.24858E-01  | 2.28361E-01 | 2.32104E-01 | 2.36787E-01 | 2.43216E-01 |
| 2.54617E-01  | 2.58277E-01 | 2.62368E-01 | 2.73016E-01 | 2.80065E-01 |
| 2.86797E-01  | 2.92323E-01 | 2.98446E-01 | 3.05339E-01 | 3.06468E-01 |
| 3.15892E-01  | 3.18652E-01 | 3.24888E-01 | 3.28838E-01 | 3.32482E-01 |
| 3.32817E-01  | 3.37323E-01 | 3.43656E-01 | 3.47254E-01 | 3.49432E-01 |
| 3.59230E-01  | 3.61371E-01 | 3.69050E-01 | 3.81727E-01 | 3.88977E-01 |
| 3.94855E-01  | 4.05146E-01 | 4.15088E-01 | 4.21612E-01 | 4.29215E-01 |
| 4.37337E-01  | 4.44896E-01 | 4.59894E-01 | 4.71203E-01 | 4.74842E-01 |
| 4.81419E-01  | 4.95319E-01 | 5.11990E-01 | 5.22530E-01 | 5.25088E-01 |
| 5.54815E-01  | 6.03678E-01 | 6.36444E-01 | 6.50302E-01 | 6.73623E-01 |
| 7.44522E-01  | 7.82475E-01 | 8.08085E-01 | 1.04237E+00 | 1.51499E+00 |

WARNING: Hessian has wrong number of negative eigenvalues

Level shifts adjusted to satisfy step-size constraints  
 Step size: 0.0383807  
 Cos(theta): 0.7554660

Final level shift: -5.7857995E-02

```

energy change:          2.8879E-04 . ( 5.0000E-05 )
gradient maximum:       1.1946E-03 . ( 4.5000E-04 )
gradient rms:           3.0204E-04 . ( 3.0000E-04 )
step size: 0.03838 trust radius: 0.03750
displacement maximum:   1.6447E-02 . ( 1.8000E-03 )
displacement rms:       3.4329E-03 . ( 1.2000E-03 )
predicted energy change: -9.1572E-05 geom step: 3.8381E-02 full step:
3.8381E-02
molecular structure not yet converged...

```

```

center of mass moved by:
  x: 5.5511E-17 y: 9.5410E-17 z: -2.2204E-16

```

new geometry:

|      | angstroms     |               |               |
|------|---------------|---------------|---------------|
| atom | x             | y             | z             |
| H25  | 0.9329130509  | -3.8988216180 | -2.2589732411 |
| C1   | 1.5076668300  | -2.9963260232 | -2.1973827346 |
| C2   | 3.0428959490  | -0.6260062736 | -2.0526201429 |
| C3   | 1.1506635087  | -1.9892951307 | -1.3102729740 |
| C4   | 2.6186487320  | -2.8105839380 | -2.9985688985 |
| C5   | 3.3792902263  | -1.6392127291 | -2.9266569099 |
| C6   | 1.9286673533  | -0.8223029601 | -1.2601292850 |
| C7   | 0.0702852508  | -1.8400113213 | -0.3293961024 |
| H27  | 2.9074469027  | -3.5773181534 | -3.6889870997 |
| H28  | 4.2358710506  | -1.5274850285 | -3.5606184956 |
| H30  | 3.6055732429  | 0.2798809836  | -1.9704121209 |
| C8   | 0.2332907240  | -0.6400923385 | 0.2444351652  |
| H32  | -0.6969120313 | -2.5513461128 | -0.1267134932 |
| C10  | -0.3835080153 | 0.2544597862  | 1.2943028765  |
| N2   | 1.3485171764  | -0.0063849753 | -0.3048677688 |
| C9   | 1.6525212646  | 1.2171866854  | 0.2402027915  |
| O1   | 2.6060368544  | 1.9003665286  | -0.0531682342 |
| H43  | -0.3500795197 | -0.2357623382 | 2.2587131529  |
| C12  | -1.8239863603 | 0.6191200564  | 0.9745175790  |
| C11  | 0.5792270602  | 1.4971598715  | 1.3013451375  |
| C18  | 1.2645053378  | 1.7417232806  | 2.6569862899  |
| H48  | 0.0379234021  | 2.3863011755  | 1.0095526585  |
| C13  | -3.4828302720 | 1.4265201631  | -0.5693681037 |
| C14  | -4.1202331512 | 0.8458692086  | 1.6632571773  |
| C15  | -4.4612890164 | 1.3094108849  | 0.4071143145  |
| C16  | -2.8063418802 | 0.5027694446  | 1.9437709791  |
| C17  | -2.1758204121 | 1.0821075917  | -0.2881947313 |
| H51  | -5.4761442091 | 1.5721810556  | 0.1857619887  |
| H52  | -2.5514108879 | 0.1392154968  | 2.9204305396  |
| H55  | -3.7416758472 | 1.7788473572  | -1.5476185790 |
| H56  | -4.8695937146 | 0.7465598931  | 2.4227062260  |
| H59  | -1.4283076990 | 1.1558294818  | -1.0527216078 |
| H60  | 1.7820128154  | 0.8489038739  | 2.9891039423  |
| H61  | 0.5312158744  | 2.0196411386  | 3.4049930784  |
| H62  | 1.9869733984  | 2.5420879604  | 2.5604575430  |

nuclear repulsion energy..... 1445.105114809 hartrees

/ end of geometry optimization iteration 19 /

end of program geopt

start of program onee

smallest eigenvalue of S: 1.215E-03

number of canonical orbitals..... 210  
 end of program onee

start of program probe  
 end of program probe

start of program grid

number of gridpoints:

|          |     |     |     |     |     |     |     |     |
|----------|-----|-----|-----|-----|-----|-----|-----|-----|
| atom     | H25 | C1  | C2  | C3  | C4  | C5  | C6  | C7  |
| grid # 1 | 73  | 89  | 87  | 90  | 87  | 87  | 85  | 85  |
| grid # 2 | 106 | 100 | 97  | 98  | 98  | 99  | 91  | 92  |
| grid # 3 | 224 | 183 | 182 | 194 | 182 | 182 | 187 | 183 |
| grid # 4 | 224 | 379 | 381 | 404 | 379 | 379 | 374 | 377 |

number of gridpoints:

|          |     |     |     |     |     |     |     |     |
|----------|-----|-----|-----|-----|-----|-----|-----|-----|
| atom     | H27 | H28 | H30 | C8  | H32 | C10 | N2  | C9  |
| grid # 1 | 73  | 73  | 73  | 86  | 73  | 82  | 100 | 76  |
| grid # 2 | 106 | 106 | 105 | 91  | 106 | 92  | 109 | 81  |
| grid # 3 | 224 | 224 | 220 | 188 | 223 | 175 | 223 | 164 |
| grid # 4 | 224 | 224 | 219 | 374 | 228 | 350 | 402 | 332 |

number of gridpoints:

|          |     |     |     |     |     |     |     |     |
|----------|-----|-----|-----|-----|-----|-----|-----|-----|
| atom     | O1  | H43 | C12 | C11 | C18 | H48 | C13 | C14 |
| grid # 1 | 111 | 68  | 90  | 81  | 71  | 70  | 88  | 87  |
| grid # 2 | 127 | 98  | 105 | 93  | 76  | 100 | 100 | 100 |
| grid # 3 | 272 | 209 | 193 | 171 | 148 | 215 | 183 | 183 |
| grid # 4 | 473 | 200 | 400 | 351 | 306 | 208 | 379 | 379 |

number of gridpoints:

|          |     |     |     |     |     |     |     |     |
|----------|-----|-----|-----|-----|-----|-----|-----|-----|
| atom     | C15 | C16 | C17 | H51 | H52 | H55 | H56 | H59 |
| grid # 1 | 89  | 87  | 86  | 73  | 73  | 73  | 73  | 70  |
| grid # 2 | 100 | 100 | 96  | 106 | 104 | 106 | 106 | 101 |
| grid # 3 | 183 | 182 | 181 | 224 | 214 | 224 | 224 | 215 |
| grid # 4 | 379 | 377 | 376 | 224 | 214 | 224 | 224 | 212 |

number of gridpoints:

|          |     |     |     |       |
|----------|-----|-----|-----|-------|
| atom     | H60 | H61 | H62 | total |
| grid # 1 | 71  | 71  | 71  | 2822  |
| grid # 2 | 99  | 99  | 99  | 3492  |
| grid # 3 | 217 | 220 | 220 | 7036  |
| grid # 4 | 218 | 222 | 221 | 10837 |

end of program grid

start of program rwr  
 recomputing RwR matrix 14 grid: 4  
 recomputing RwR matrix 15 grid: 4  
 end of program rwr

start of program scf

|      |   |   |   |   |              |                  |                                       |
|------|---|---|---|---|--------------|------------------|---------------------------------------|
| i    | u | d | i | g |              |                  |                                       |
| t    | p | i | c | r |              |                  |                                       |
| e    | d | i | u | i |              |                  |                                       |
| r    | t | s | t | d | total energy | energy change    | RMS density change maximum DIIS error |
| etot | 1 | N | N | 1 | U            | -815.14158405516 | 1.5E-04 3.1E-03                       |

|      |   |   |   |   |   |                  |          |         |         |
|------|---|---|---|---|---|------------------|----------|---------|---------|
| etot | 2 | Y | Y | 4 | M | -815.14238354153 | 8.0E-04  | 5.6E-05 | 7.1E-04 |
| etot | 3 | Y | Y | 4 | M | -815.14246649663 | 8.3E-05  | 2.0E-05 | 2.4E-04 |
| etot | 4 | Y | Y | 4 | M | -815.14247311310 | 6.6E-06  | 8.2E-06 | 1.4E-04 |
| etot | 5 | Y | Y | 4 | M | -815.14247378525 | 6.7E-07  | 3.0E-06 | 4.1E-05 |
| etot | 6 | N | N | 1 | U | -815.14246928853 | -4.5E-06 | 0.0E+00 | 0.0E+00 |

Energy components, in hartrees:

|     |                               |                   |       |
|-----|-------------------------------|-------------------|-------|
| (A) | Nuclear repulsion.....        | 1445.10511480906  |       |
| (E) | Total one-electron terms..... | -3975.70049000285 |       |
| (I) | Total two-electron terms..... | 1715.45290590526  |       |
| (L) | Electronic energy.....        | -2260.24758409758 | (E+I) |
| (N) | Total energy.....             | -815.14246928853  | (A+L) |

SCFE: SCF energy: HF -815.14246928853 hartrees iterations: 6

HOMO energy: -0.29674

LUMO energy: 0.11843

Orbital energies:

|           |           |           |           |           |           |
|-----------|-----------|-----------|-----------|-----------|-----------|
| -20.45244 | -15.55234 | -11.32146 | -11.23585 | -11.22257 | -11.21374 |
| -11.20681 | -11.20065 | -11.18771 | -11.18604 | -11.18548 | -11.18500 |
| -11.18359 | -11.18329 | -11.17893 | -11.17685 | -11.17673 | -11.17570 |
| -11.17538 | -11.17235 | -1.42331  | -1.33297  | -1.18079  | -1.16249  |
| -1.11552  | -1.08803  | -1.04113  | -1.02798  | -1.01992  | -1.00047  |
| -0.94694  | -0.90588  | -0.85507  | -0.84396  | -0.83155  | -0.81097  |
| -0.79423  | -0.76203  | -0.72120  | -0.69071  | -0.67873  | -0.66914  |
| -0.65822  | -0.64093  | -0.64020  | -0.62706  | -0.61163  | -0.60601  |
| -0.60399  | -0.60172  | -0.59205  | -0.57715  | -0.55834  | -0.55520  |
| -0.54047  | -0.53141  | -0.51661  | -0.50790  | -0.49983  | -0.49641  |
| -0.49113  | -0.48637  | -0.45917  | -0.42198  | -0.39337  | -0.34987  |
| -0.34265  | -0.31499  | -0.29674  | 0.11843   | 0.13423   | 0.13932   |
| 0.14326   | 0.20538   | 0.22582   | 0.26476   | 0.27110   | 0.27359   |
| 0.29970   |           |           |           |           |           |

end of program scf

start of program derla

end of program derla

start of program rwr

recomputing RwR matrix 4 grid: 4

recomputing RwR matrix 14 grid: 4

recomputing RwR matrix 15 grid: 4

end of program rwr

start of program derlb

forces (hartrees/bohr) : total

| atom | label | x             | y             | z             |
|------|-------|---------------|---------------|---------------|
| 1    | H25   | 9.039735E-05  | -1.295770E-04 | -1.559117E-04 |
| 2    | C1    | 4.567170E-04  | 4.018140E-07  | -5.736836E-04 |
| 3    | C2    | -3.478091E-04 | 2.212115E-04  | 3.420346E-04  |
| 4    | C3    | 1.907708E-04  | 5.369560E-04  | 2.508664E-04  |
| 5    | C4    | -2.735343E-04 | -1.929635E-04 | 2.647466E-04  |
| 6    | C5    | -3.779371E-04 | -1.622912E-04 | -3.399880E-05 |

|       |     |               |               |               |
|-------|-----|---------------|---------------|---------------|
| 7     | C6  | -2.869867E-04 | -3.007315E-04 | 5.398571E-05  |
| 8     | C7  | 1.143653E-04  | 4.055755E-04  | -4.577916E-04 |
| 9     | H27 | -4.300463E-05 | -2.749719E-04 | -1.170146E-04 |
| 10    | H28 | 6.153270E-06  | -1.023517E-04 | 2.255534E-05  |
| 11    | H30 | 8.667344E-06  | 6.766074E-05  | 4.754569E-05  |
| 12    | C8  | -3.091938E-04 | 1.424151E-04  | -1.072543E-03 |
| 13    | H32 | 3.861177E-05  | 9.287580E-05  | -5.620798E-05 |
| 14    | C10 | 7.120931E-04  | -1.514412E-05 | 1.187047E-04  |
| 15    | N2  | 6.680637E-04  | -3.304244E-04 | 4.168498E-04  |
| 16    | C9  | 5.718285E-04  | -2.344571E-04 | 4.712025E-04  |
| 17    | O1  | 4.094204E-05  | -7.405950E-05 | -1.080648E-06 |
| 18    | H43 | 4.794769E-04  | 6.526275E-05  | 1.351280E-04  |
| 19    | C12 | 4.439654E-05  | -6.290584E-04 | 3.096449E-04  |
| 20    | C11 | -1.666060E-04 | 4.271503E-04  | -4.026804E-05 |
| 21    | C18 | -6.295140E-04 | 1.141440E-04  | 1.250653E-04  |
| 22    | H48 | 2.321387E-05  | 3.671619E-05  | -6.558310E-04 |
| 23    | C13 | -2.384790E-04 | 1.319345E-04  | -6.347761E-05 |
| 24    | C14 | -2.275233E-04 | 1.516956E-04  | -1.500602E-04 |
| 25    | C15 | -1.914697E-04 | 5.271049E-05  | 7.273050E-05  |
| 26    | C16 | 4.506627E-04  | 8.191575E-05  | 2.496570E-04  |
| 27    | C17 | 4.143977E-04  | -4.220802E-05 | 2.179080E-04  |
| 28    | H51 | -1.205446E-04 | 1.103765E-04  | -6.372009E-06 |
| 29    | H52 | 8.517684E-05  | -1.265550E-05 | 7.113625E-05  |
| 30    | H55 | -3.199210E-05 | 1.083707E-04  | -2.065778E-04 |
| 31    | H56 | -1.889050E-04 | 5.012139E-05  | 1.893690E-04  |
| 32    | H59 | 3.002526E-04  | 1.678680E-05  | -3.068919E-04 |
| 33    | H60 | 1.609915E-05  | 5.240561E-05  | -9.398131E-06 |
| 34    | H61 | 2.719173E-04  | -1.503996E-04 | -6.990390E-05 |
| 35    | H62 | 2.574238E-05  | -1.688952E-05 | -1.464338E-04 |
| ----- |     | -----         | -----         | -----         |
| total |     | 1.576447E-03  | 1.985042E-04  | -7.643164E-04 |

end of program derlb

start of program geopt 20

geometry optimization step 20

reading input hessian of dimension 105

in five columns format

reading input hessian of dimension 105

in five columns format

Hessian eigenvalues:

|              |             |             |             |             |
|--------------|-------------|-------------|-------------|-------------|
| -4.92083E-03 | 0.00000E+00 | 0.00000E+00 | 0.00000E+00 | 0.00000E+00 |
| 0.00000E+00  | 0.00000E+00 | 0.00000E+00 | 0.00000E+00 | 0.00000E+00 |
| 0.00000E+00  | 0.00000E+00 | 0.00000E+00 | 0.00000E+00 | 0.00000E+00 |
| 0.00000E+00  | 0.00000E+00 | 0.00000E+00 | 0.00000E+00 | 0.00000E+00 |
| 0.00000E+00  | 0.00000E+00 | 0.00000E+00 | 0.00000E+00 | 0.00000E+00 |
| 0.00000E+00  | 0.00000E+00 | 2.42462E-03 | 1.42212E-02 | 2.05065E-02 |
| 2.75060E-02  | 2.88712E-02 | 2.97149E-02 | 3.05542E-02 | 3.10775E-02 |
| 3.29447E-02  | 3.72550E-02 | 4.36451E-02 | 4.50321E-02 | 5.59923E-02 |
| 5.93210E-02  | 6.58776E-02 | 6.99218E-02 | 7.31347E-02 | 7.45796E-02 |
| 8.35382E-02  | 8.60020E-02 | 9.67931E-02 | 1.04036E-01 | 1.12326E-01 |
| 1.17956E-01  | 1.24473E-01 | 1.33610E-01 | 1.36388E-01 | 1.41732E-01 |
| 1.46108E-01  | 1.47473E-01 | 1.53339E-01 | 1.60439E-01 | 1.61587E-01 |
| 1.70684E-01  | 1.79255E-01 | 1.81557E-01 | 1.86775E-01 | 1.89154E-01 |
| 2.03633E-01  | 2.06457E-01 | 2.09357E-01 | 2.14971E-01 | 2.19705E-01 |
| 2.25589E-01  | 2.29827E-01 | 2.32431E-01 | 2.44514E-01 | 2.49985E-01 |
| 2.55128E-01  | 2.59997E-01 | 2.69728E-01 | 2.82167E-01 | 2.86218E-01 |
| 2.89182E-01  | 2.95988E-01 | 3.00273E-01 | 3.10229E-01 | 3.15228E-01 |
| 3.19193E-01  | 3.25968E-01 | 3.28971E-01 | 3.31777E-01 | 3.34440E-01 |



|             |             |             |             |             |
|-------------|-------------|-------------|-------------|-------------|
| 3.38177E-01 | 3.40219E-01 | 3.45327E-01 | 3.47980E-01 | 3.56467E-01 |
| 3.56821E-01 | 3.61188E-01 | 3.74760E-01 | 3.84077E-01 | 3.95884E-01 |
| 4.02686E-01 | 4.10628E-01 | 4.17813E-01 | 4.26488E-01 | 4.30241E-01 |
| 4.40275E-01 | 4.46385E-01 | 4.60207E-01 | 4.71054E-01 | 4.78409E-01 |
| 4.81772E-01 | 4.97888E-01 | 5.02505E-01 | 5.11350E-01 | 5.38838E-01 |
| 5.71440E-01 | 5.96299E-01 | 6.05686E-01 | 6.34469E-01 | 6.68546E-01 |
| 7.44107E-01 | 7.51127E-01 | 7.89392E-01 | 1.03660E+00 | 1.51803E+00 |

WARNING: Hessian has wrong number of negative eigenvalues

Level shifts adjusted to satisfy step-size constraints

Step size: 0.0754282

Cos(theta): 0.7409694

Final level shift: -3.0725091E-02

energy change: 1.6042E-04 . ( 5.0000E-05 )

gradient maximum: 1.1336E-03 . ( 4.5000E-04 )

gradient rms: 3.2456E-04 . ( 3.0000E-04 )

step size: 0.07543 trust radius: 0.07500

displacement maximum: 3.1467E-02 . ( 1.8000E-03 )

displacement rms: 6.7465E-03 . ( 1.2000E-03 )

predicted energy change: -1.8881E-04 geom step: 7.5428E-02 full step:  
7.5428E-02

molecular structure not yet converged...

center of mass moved by:

x: 7.0022E-03 y: -4.9549E-03 z: 2.2705E-03

new geometry:

|      | angstroms     |               |               |
|------|---------------|---------------|---------------|
| atom | x             | y             | z             |
| H25  | 0.9163260706  | -3.8838836842 | -2.2947234504 |
| C1   | 1.5007287505  | -2.9885383106 | -2.2200095222 |
| C2   | 3.0621174720  | -0.6395784961 | -2.0404975802 |
| C3   | 1.1463478138  | -1.9837633377 | -1.3284364642 |
| C4   | 2.6221779423  | -2.8120522794 | -3.0077612276 |
| C5   | 3.3952723093  | -1.6506569701 | -2.9189986191 |
| C6   | 1.9374613006  | -0.8275970768 | -1.2604636320 |
| C7   | 0.0578761712  | -1.8274166436 | -0.3590573705 |
| H27  | 2.9089005670  | -3.5779685406 | -3.7001999511 |
| H28  | 4.2603074982  | -1.5446553344 | -3.5425075331 |
| H30  | 3.6352740365  | 0.2583491999  | -1.9452632618 |
| C8   | 0.2287224023  | -0.6340852469 | 0.2251566998  |
| H32  | -0.7205237317 | -2.5299739857 | -0.1696195420 |
| C10  | -0.3852453869 | 0.2561668835  | 1.2803546711  |
| N2   | 1.3576027880  | -0.0107812066 | -0.3062578495 |
| C9   | 1.6690323848  | 1.2060554354  | 0.2499805715  |
| O1   | 2.6387705334  | 1.8773049478  | -0.0225470680 |
| H43  | -0.3437725996 | -0.2388851991 | 2.2421933137  |
| C12  | -1.8280426393 | 0.6203127447  | 0.9728426964  |
| C11  | 0.5774073282  | 1.4990303541  | 1.2888323386  |
| C18  | 1.2344244990  | 1.7667809124  | 2.6519884415  |
| H48  | 0.0397373353  | 2.3817623510  | 0.9710616474  |
| C13  | -3.5034396977 | 1.4254943335  | -0.5564643489 |
| C14  | -4.1184978552 | 0.8509576962  | 1.6845255725  |
| C15  | -4.4724652683 | 1.3114767261  | 0.4302343013  |
| C16  | -2.8010793039 | 0.5073874296  | 1.9525139487  |
| C17  | -2.1926258549 | 1.0807482137  | -0.2876489158 |
| H51  | -5.4894987959 | 1.5743855212  | 0.2184461130  |
| H52  | -2.5360744255 | 0.1465924758  | 2.9281516738  |

|     |               |              |               |
|-----|---------------|--------------|---------------|
| H55 | -3.7721677469 | 1.7752220608 | -1.5336746256 |
| H56 | -4.8602474829 | 0.7540108048 | 2.4524449761  |
| H59 | -1.4526102575 | 1.1524880592 | -1.0606733050 |
| H60 | 1.7502649740  | 0.8851098726 | 3.0057148947  |
| H61 | 0.4880653452  | 2.0480340249 | 3.3798341874  |
| H62 | 1.9537971132  | 2.5691308853 | 2.5594563641  |

nuclear repulsion energy..... 1444.238800790 hartrees

-----  
 / end of geometry optimization iteration 20 /  
 -----

end of program geopt

start of program onee  
 smallest eigenvalue of S: 1.212E-03  
 number of canonical orbitals..... 210  
 end of program onee

start of program probe  
 end of program probe

start of program grid

number of gridpoints:

| atom     | H25 | C1  | C2  | C3  | C4  | C5  | C6  | C7  |
|----------|-----|-----|-----|-----|-----|-----|-----|-----|
| grid # 1 | 73  | 89  | 87  | 90  | 87  | 87  | 85  | 85  |
| grid # 2 | 106 | 100 | 97  | 98  | 98  | 99  | 91  | 92  |
| grid # 3 | 224 | 183 | 182 | 194 | 182 | 182 | 188 | 183 |
| grid # 4 | 224 | 379 | 381 | 406 | 379 | 379 | 374 | 377 |

number of gridpoints:

| atom     | H27 | H28 | H30 | C8  | H32 | C10 | N2  | C9  |
|----------|-----|-----|-----|-----|-----|-----|-----|-----|
| grid # 1 | 73  | 73  | 73  | 86  | 73  | 82  | 99  | 75  |
| grid # 2 | 106 | 106 | 105 | 91  | 106 | 93  | 109 | 80  |
| grid # 3 | 224 | 224 | 220 | 188 | 223 | 175 | 223 | 164 |
| grid # 4 | 224 | 224 | 219 | 373 | 228 | 349 | 402 | 334 |

number of gridpoints:

| atom     | O1  | H43 | C12 | C11 | C18 | H48 | C13 | C14 |
|----------|-----|-----|-----|-----|-----|-----|-----|-----|
| grid # 1 | 111 | 69  | 90  | 81  | 71  | 69  | 88  | 87  |
| grid # 2 | 127 | 98  | 105 | 93  | 74  | 99  | 100 | 100 |
| grid # 3 | 272 | 208 | 193 | 172 | 142 | 216 | 183 | 183 |
| grid # 4 | 473 | 201 | 400 | 352 | 305 | 208 | 380 | 379 |

number of gridpoints:

| atom     | C15 | C16 | C17 | H51 | H52 | H55 | H56 | H59 |
|----------|-----|-----|-----|-----|-----|-----|-----|-----|
| grid # 1 | 89  | 87  | 85  | 73  | 73  | 73  | 73  | 70  |
| grid # 2 | 100 | 100 | 97  | 106 | 104 | 106 | 106 | 101 |
| grid # 3 | 183 | 182 | 181 | 224 | 214 | 224 | 224 | 215 |
| grid # 4 | 379 | 378 | 376 | 224 | 214 | 224 | 224 | 212 |

number of gridpoints:

| atom     | H60 | H61 | H62 | total |
|----------|-----|-----|-----|-------|
| grid # 1 | 71  | 71  | 71  | 2819  |
| grid # 2 | 99  | 99  | 99  | 3490  |
| grid # 3 | 217 | 220 | 220 | 7032  |
| grid # 4 | 218 | 222 | 221 | 10842 |

end of program grid

start of program rwr  
recomputing RwR matrix 14 grid: 4  
recomputing RwR matrix 15 grid: 4  
end of program rwr

start of program scf

|      | i | u | d | i | g |                  |               | RMS     | maximum |
|------|---|---|---|---|---|------------------|---------------|---------|---------|
|      | t | p | i | c | r |                  |               | energy  | density |
|      | e | d | i | u | i |                  |               | change  | DIIS    |
|      | r | t | s | t | d | total energy     | energy change | change  | error   |
| etot | 1 | N | N | 1 | U | -815.14049630175 |               | 1.9E-04 | 5.9E-03 |
| etot | 2 | Y | Y | 4 | M | -815.14234406790 | 1.8E-03       | 8.2E-05 | 2.4E-03 |
| etot | 3 | Y | Y | 4 | M | -815.14255162518 | 2.1E-04       | 2.7E-05 | 7.3E-04 |
| etot | 4 | N | Y | 1 | U | -815.14257118464 | 2.0E-05       | 7.5E-06 | 1.6E-04 |
| etot | 5 | Y | Y | 4 | M | -815.14257065930 | -5.3E-07      | 4.5E-06 | 6.0E-05 |
| etot | 6 | Y | N | 4 | M | -815.14257165259 | 9.9E-07       | 0.0E+00 | 0.0E+00 |

Energy components, in hartrees:

|     |                               |                   |       |
|-----|-------------------------------|-------------------|-------|
| (A) | Nuclear repulsion.....        | 1444.23880078977  |       |
| (E) | Total one-electron terms..... | -3973.96210494348 |       |
| (I) | Total two-electron terms..... | 1714.58073250112  |       |
| (L) | Electronic energy.....        | -2259.38137244236 | (E+I) |
| (N) | Total energy.....             | -815.14257165259  | (A+L) |

SCFE: SCF energy: HF -815.14257165259 hartrees iterations: 6

HOMO energy: -0.29669  
LUMO energy: 0.11846

Orbital energies:

|           |           |           |           |           |           |
|-----------|-----------|-----------|-----------|-----------|-----------|
| -20.45245 | -15.55239 | -11.32159 | -11.23572 | -11.22248 | -11.21385 |
| -11.20684 | -11.20095 | -11.18759 | -11.18647 | -11.18589 | -11.18547 |
| -11.18404 | -11.18370 | -11.17892 | -11.17678 | -11.17666 | -11.17539 |
| -11.17446 | -11.17231 | -1.42247  | -1.33314  | -1.18064  | -1.16252  |
| -1.11569  | -1.08819  | -1.04125  | -1.02772  | -1.02030  | -1.00044  |
| -0.94727  | -0.90623  | -0.85510  | -0.84400  | -0.83164  | -0.81106  |
| -0.79418  | -0.76199  | -0.72102  | -0.69123  | -0.67877  | -0.66913  |
| -0.65823  | -0.64084  | -0.64026  | -0.62712  | -0.61158  | -0.60584  |
| -0.60412  | -0.60165  | -0.59213  | -0.57743  | -0.55805  | -0.55560  |
| -0.54037  | -0.53161  | -0.51660  | -0.50777  | -0.49994  | -0.49651  |
| -0.49121  | -0.48637  | -0.45919  | -0.42218  | -0.39333  | -0.34977  |
| -0.34279  | -0.31521  | -0.29669  | 0.11846   | 0.13399   | 0.13901   |
| 0.14282   | 0.20542   | 0.22584   | 0.26467   | 0.27125   | 0.27391   |
| 0.29946   |           |           |           |           |           |

end of program scf

start of program derla  
end of program derla

start of program rwr  
recomputing RwR matrix 4 grid: 4

```

recomputing RwR matrix 14    grid: 4
recomputing RwR matrix 15    grid: 4
end of program rwr

```

start of program derlb

forces (hartrees/bohr) : total

| atom  | label | x             | y             | z             |
|-------|-------|---------------|---------------|---------------|
| 1     | H25   | -5.590149E-05 | -3.870109E-05 | -4.335196E-05 |
| 2     | C1    | -9.580971E-05 | -2.803892E-04 | -1.169699E-04 |
| 3     | C2    | -2.597715E-04 | -1.276678E-04 | 1.489579E-04  |
| 4     | C3    | 2.398921E-04  | -3.856143E-05 | -2.763762E-04 |
| 5     | C4    | -3.842977E-04 | -1.045407E-04 | 2.506730E-04  |
| 6     | C5    | 1.045618E-04  | 5.579275E-04  | 2.046451E-04  |
| 7     | C6    | 8.646678E-04  | 1.218533E-04  | -6.563139E-04 |
| 8     | C7    | -7.072315E-04 | -1.903583E-04 | -3.846562E-04 |
| 9     | H27   | -7.288527E-05 | -1.357228E-04 | -4.586758E-05 |
| 10    | H28   | -3.479510E-05 | -5.710454E-05 | 4.001539E-05  |
| 11    | H30   | 7.552734E-05  | 1.104444E-04  | 1.423703E-05  |
| 12    | C8    | -6.393986E-04 | 2.723840E-04  | -5.898228E-04 |
| 13    | H32   | -1.631785E-05 | -4.003301E-05 | -2.710056E-05 |
| 14    | C10   | 1.018555E-03  | -1.299700E-04 | 1.122802E-04  |
| 15    | N2    | 8.652664E-04  | 3.661115E-05  | 5.000355E-04  |
| 16    | C9    | 2.401113E-03  | 7.281648E-04  | -1.113410E-04 |
| 17    | O1    | -1.981303E-03 | -1.324548E-03 | 5.443576E-04  |
| 18    | H43   | 3.450412E-04  | 7.613875E-05  | 1.523468E-04  |
| 19    | C12   | -4.781526E-04 | -3.970645E-04 | 2.881204E-04  |
| 20    | C11   | -1.744470E-04 | 5.130172E-04  | -6.834861E-04 |
| 21    | C18   | 2.039834E-05  | 6.370190E-04  | -1.542724E-03 |
| 22    | H48   | 6.160058E-05  | 9.992152E-05  | -5.899728E-04 |
| 23    | C13   | 3.644883E-04  | -5.934096E-05 | -5.048361E-05 |
| 24    | C14   | 2.939735E-04  | 1.387311E-05  | -1.167209E-04 |
| 25    | C15   | 3.250199E-04  | -7.557025E-05 | 2.812143E-04  |
| 26    | C16   | -1.220484E-04 | 2.512147E-04  | 1.636867E-04  |
| 27    | C17   | -1.602012E-04 | 1.127346E-04  | -1.197069E-05 |
| 28    | H51   | 1.493578E-05  | 5.714623E-05  | 2.703222E-05  |
| 29    | H52   | -7.571553E-05 | 9.560980E-05  | -3.377796E-04 |
| 30    | H55   | 1.217777E-04  | -1.814425E-05 | 2.389206E-04  |
| 31    | H56   | 9.604136E-05  | 9.189443E-05  | -1.005150E-04 |
| 32    | H59   | -9.976177E-05 | -4.646901E-05 | 1.213953E-04  |
| 33    | H60   | 1.001511E-03  | -1.894392E-03 | 6.263527E-04  |
| 34    | H61   | -1.687354E-03 | 7.800341E-04  | 1.825364E-03  |
| 35    | H62   | 3.974147E-04  | 5.722640E-04  | -3.568094E-04 |
| total |       | 1.566394E-03  | 1.696754E-04  | -5.026273E-04 |

end of program derlb

start of program geopt 21

```

geometry optimization step 21
reading input hessian of dimension 105
  in five columns format
reading input hessian of dimension 105
  in five columns format

```

Hessian eigenvalues:

```

-3.14757E-02    0.00000E+00    0.00000E+00    0.00000E+00    0.00000E+00

```

|             |             |             |             |             |
|-------------|-------------|-------------|-------------|-------------|
| 0.00000E+00 | 0.00000E+00 | 0.00000E+00 | 0.00000E+00 | 0.00000E+00 |
| 0.00000E+00 | 0.00000E+00 | 0.00000E+00 | 0.00000E+00 | 0.00000E+00 |
| 0.00000E+00 | 0.00000E+00 | 0.00000E+00 | 0.00000E+00 | 0.00000E+00 |
| 0.00000E+00 | 0.00000E+00 | 0.00000E+00 | 0.00000E+00 | 0.00000E+00 |
| 0.00000E+00 | 0.00000E+00 | 1.14827E-03 | 1.22180E-02 | 2.07238E-02 |
| 2.21114E-02 | 2.83976E-02 | 3.03852E-02 | 3.06736E-02 | 3.11876E-02 |
| 3.14045E-02 | 3.60114E-02 | 3.77495E-02 | 4.47000E-02 | 5.54533E-02 |
| 5.71840E-02 | 6.68602E-02 | 6.72899E-02 | 7.35070E-02 | 7.45084E-02 |
| 8.12096E-02 | 8.74327E-02 | 9.46968E-02 | 1.06797E-01 | 1.09777E-01 |
| 1.12819E-01 | 1.24281E-01 | 1.30571E-01 | 1.41436E-01 | 1.43111E-01 |
| 1.45896E-01 | 1.48389E-01 | 1.51472E-01 | 1.57095E-01 | 1.65049E-01 |
| 1.72361E-01 | 1.77388E-01 | 1.81810E-01 | 1.88122E-01 | 1.94169E-01 |
| 1.99512E-01 | 2.06415E-01 | 2.11374E-01 | 2.12893E-01 | 2.16652E-01 |
| 2.27496E-01 | 2.31795E-01 | 2.33926E-01 | 2.45808E-01 | 2.49952E-01 |
| 2.54159E-01 | 2.59991E-01 | 2.62132E-01 | 2.67731E-01 | 2.85040E-01 |
| 2.90925E-01 | 2.92250E-01 | 3.01023E-01 | 3.03930E-01 | 3.11295E-01 |
| 3.19461E-01 | 3.21509E-01 | 3.25957E-01 | 3.31560E-01 | 3.32022E-01 |
| 3.35449E-01 | 3.41717E-01 | 3.43569E-01 | 3.45540E-01 | 3.57984E-01 |
| 3.61961E-01 | 3.68036E-01 | 3.79848E-01 | 3.86923E-01 | 3.93588E-01 |
| 4.04733E-01 | 4.08780E-01 | 4.12637E-01 | 4.29958E-01 | 4.33652E-01 |
| 4.40668E-01 | 4.46746E-01 | 4.58509E-01 | 4.72606E-01 | 4.73764E-01 |
| 4.85686E-01 | 4.91019E-01 | 5.14278E-01 | 5.16673E-01 | 5.38872E-01 |
| 5.61877E-01 | 5.90160E-01 | 6.31005E-01 | 6.33462E-01 | 6.68420E-01 |
| 7.11911E-01 | 7.44248E-01 | 8.08616E-01 | 1.05071E+00 | 1.54996E+00 |

WARNING: Hessian has wrong number of negative eigenvalues

Level shifts adjusted to satisfy step-size constraints

Step size: 0.1063933

Cos(theta): 0.5224784

Final level shift: -3.8591377E-02

energy change: -1.0236E-04 . ( 5.0000E-05 )

gradient maximum: 2.6602E-03 . ( 4.5000E-04 )

gradient rms: 5.0184E-04 . ( 3.0000E-04 )

step size: 0.10639 trust radius: 0.10607

displacement maximum: 4.4366E-02 . ( 1.8000E-03 )

displacement rms: 9.5160E-03 . ( 1.2000E-03 )

predicted energy change: -3.7437E-04 geom step: 1.0639E-01 full step:  
1.0639E-01

molecular structure not yet converged...

center of mass moved by:

x: 9.0810E-03 y: -8.5668E-03 z: 6.1758E-03

new geometry:

|      | angstroms    |               |               |
|------|--------------|---------------|---------------|
| atom | x            | y             | z             |
| H25  | 0.8868853718 | -3.8538237866 | -2.3549578724 |
| C1   | 1.4837868608 | -2.9697672869 | -2.2572258918 |
| C2   | 3.0789702156 | -0.6443771088 | -2.0254273541 |
| C3   | 1.1384600915 | -1.9751093575 | -1.3534929969 |
| C4   | 2.6129498816 | -2.7886538464 | -3.0349414433 |
| C5   | 3.4028395048 | -1.6415500459 | -2.9199515447 |
| C6   | 1.9466974999 | -0.8319491307 | -1.2598711135 |
| C7   | 0.0446199884 | -1.8217242164 | -0.3898154184 |
| H27  | 2.8945050041 | -3.5432626532 | -3.7427867054 |
| H28  | 4.2750036412 | -1.5365387705 | -3.5356366533 |
| H30  | 3.6622456715 | 0.2460141691  | -1.9064161827 |
| C8   | 0.2244423872 | -0.6362641434 | 0.2098149381  |

|     |               |               |               |
|-----|---------------|---------------|---------------|
| H32 | -0.7423573544 | -2.5200741666 | -0.2170304743 |
| C10 | -0.3877191282 | 0.2499584354  | 1.2724133332  |
| N2  | 1.3717397968  | -0.0229453572 | -0.2979024555 |
| C9  | 1.6890543629  | 1.1822088200  | 0.2749779532  |
| O1  | 2.6691608102  | 1.8403948475  | 0.0322190325  |
| H43 | -0.3512001752 | -0.2610736613 | 2.2267800208  |
| C12 | -1.8301342769 | 0.6216054084  | 0.9722868041  |
| C11 | 0.5774407869  | 1.4899701601  | 1.2826881111  |
| C18 | 1.1976851341  | 1.7984641052  | 2.6527543905  |
| H48 | 0.0477268513  | 2.3627184166  | 0.9361657115  |
| C13 | -3.5194142239 | 1.3855959827  | -0.5600494649 |
| C14 | -4.1028128638 | 0.8916492284  | 1.7052961487  |
| C15 | -4.4709654450 | 1.3135140126  | 0.4425205626  |
| C16 | -2.7874784654 | 0.5457157165  | 1.9674507545  |
| C17 | -2.2109775538 | 1.0415933628  | -0.2963966927 |
| H51 | -5.4865790643 | 1.5775692639  | 0.2346220224  |
| H52 | -2.5125272855 | 0.2160862461  | 2.9561884931  |
| H55 | -3.8003644330 | 1.7018916555  | -1.5478831289 |
| H56 | -4.8307746568 | 0.8318289291  | 2.4851291557  |
| H59 | -1.4859175062 | 1.0736251330  | -1.0803134418 |
| H60 | 1.6942660010  | 0.9252011410  | 3.0571730167  |
| H61 | 0.4286905478  | 2.1159346012  | 3.3489500907  |
| H62 | 1.9281853299  | 2.5912055660  | 2.5472124318  |

nuclear repulsion energy..... 1444.706032409 hartrees

-----  
 / end of geometry optimization iteration 21 /  
 -----

end of program geopt

start of program onee  
 smallest eigenvalue of S: 1.210E-03  
 number of canonical orbitals..... 210  
 end of program onee

start of program probe  
 end of program probe

start of program grid

number of gridpoints:

| atom     | H25 | C1  | C2  | C3  | C4  | C5  | C6  | C7  |
|----------|-----|-----|-----|-----|-----|-----|-----|-----|
| grid # 1 | 73  | 89  | 87  | 90  | 87  | 87  | 85  | 85  |
| grid # 2 | 106 | 100 | 97  | 98  | 98  | 98  | 91  | 92  |
| grid # 3 | 224 | 182 | 181 | 194 | 182 | 182 | 187 | 182 |
| grid # 4 | 224 | 379 | 381 | 404 | 379 | 379 | 374 | 378 |

number of gridpoints:

| atom     | H27 | H28 | H30 | C8  | H32 | C10 | N2  | C9  |
|----------|-----|-----|-----|-----|-----|-----|-----|-----|
| grid # 1 | 73  | 73  | 73  | 86  | 73  | 81  | 99  | 75  |
| grid # 2 | 106 | 106 | 105 | 91  | 106 | 93  | 109 | 80  |
| grid # 3 | 224 | 224 | 220 | 187 | 223 | 175 | 223 | 164 |
| grid # 4 | 224 | 224 | 219 | 374 | 229 | 346 | 400 | 330 |

number of gridpoints:

| atom     | O1  | H43 | C12 | C11 | C18 | H48 | C13 | C14 |
|----------|-----|-----|-----|-----|-----|-----|-----|-----|
| grid # 1 | 111 | 68  | 90  | 81  | 72  | 69  | 87  | 87  |
| grid # 2 | 123 | 97  | 105 | 94  | 75  | 98  | 100 | 99  |

|          |     |     |     |     |     |     |     |     |
|----------|-----|-----|-----|-----|-----|-----|-----|-----|
| grid # 3 | 272 | 210 | 193 | 171 | 141 | 216 | 183 | 183 |
| grid # 4 | 473 | 201 | 400 | 353 | 309 | 208 | 380 | 377 |

```

number of gridpoints:
  atom      C15      C16      C17      H51      H52      H55      H56      H59
grid # 1      87      87      85      73      73      73      73      70
grid # 2     100      99      96     106     103     106     106     102
grid # 3     183     181     180     224     215     224     224     215
grid # 4     378     376     375     224     214     224     224     212

```

```

number of gridpoints:
  atom      H60      H61      H62  total
grid # 1      71      72      71   2816
grid # 2      99      99      99   3482
grid # 3     217     221     220   7027
grid # 4     218     222     221  10833

```

end of program grid

```

start of program rwr
recomputing RwR matrix 15      grid: 4
end of program rwr

```

start of program scf

|      | i | u | d | i | g |                  |          | RMS     | maximum |
|------|---|---|---|---|---|------------------|----------|---------|---------|
|      | t | p | i | c | r |                  |          | energy  | density |
|      | e | d | i | u | i |                  |          | change  | DIIS    |
|      | r | t | s | t | d | total energy     | energy   | change  | error   |
|      |   |   |   |   |   |                  | change   |         |         |
| etot | 1 | N | N | 2 | U | -815.13657410208 |          | 3.2E-04 | 9.3E-03 |
| etot | 2 | Y | Y | 6 | M | -815.14208125466 | 5.5E-03  | 1.4E-04 | 3.9E-03 |
| etot | 3 | N | Y | 2 | U | -815.14265337798 | 5.7E-04  | 4.9E-05 | 1.2E-03 |
| etot | 4 | Y | Y | 6 | M | -815.14270901645 | 5.6E-05  | 1.4E-05 | 3.1E-04 |
| etot | 5 | Y | Y | 6 | M | -815.14271742217 | 8.4E-06  | 7.0E-06 | 1.2E-04 |
| etot | 6 | Y | Y | 6 | M | -815.14271796120 | 5.4E-07  | 2.7E-06 | 4.3E-05 |
| etot | 7 | Y | N | 6 | M | -815.14271783004 | -1.3E-07 | 0.0E+00 | 0.0E+00 |

```

Energy components, in hartrees:
(A) Nuclear repulsion..... 1444.70603240922
(E) Total one-electron terms..... -3974.87914107188
(I) Total two-electron terms..... 1715.03039083262
(L) Electronic energy..... -2259.84875023927 (E+I)
(N) Total energy..... -815.14271783004 (A+L)

```

SCFE: SCF energy: HF -815.14271783004 hartrees iterations: 7

```

HOMO energy: -0.29706
LUMO energy: 0.11893

```

```

Orbital energies:
-20.45246 -15.55195 -11.32074 -11.23607 -11.22226 -11.21381
-11.20554 -11.20033 -11.18754 -11.18629 -11.18498 -11.18474
-11.18288 -11.18268 -11.17897 -11.17708 -11.17650 -11.17529
-11.17456 -11.17233 -1.42594 -1.33366 -1.18164 -1.16333
-1.11590 -1.08863 -1.04175 -1.02873 -1.02032 -1.00078
-0.94714 -0.90637 -0.85490 -0.84450 -0.83177 -0.81100
-0.79446 -0.76214 -0.72133 -0.69248 -0.67867 -0.66899

```

|          |          |          |          |          |          |
|----------|----------|----------|----------|----------|----------|
| -0.65850 | -0.64116 | -0.64060 | -0.62735 | -0.61202 | -0.60660 |
| -0.60427 | -0.60220 | -0.59227 | -0.57865 | -0.55723 | -0.55580 |
| -0.53911 | -0.53181 | -0.51652 | -0.50811 | -0.49996 | -0.49661 |
| -0.49154 | -0.48607 | -0.45965 | -0.42241 | -0.39405 | -0.35047 |
| -0.34287 | -0.31487 | -0.29706 | 0.11893  | 0.13462  | 0.13955  |
| 0.14270  | 0.20583  | 0.22599  | 0.26443  | 0.27123  | 0.27424  |
| 0.29998  |          |          |          |          |          |

end of program scf

start of program derla  
end of program derla

start of program rwr  
recomputing RwR matrix 4 grid: 4  
recomputing RwR matrix 15 grid: 4  
end of program rwr

start of program derlb

forces (hartrees/bohr) : total

| atom | label | x             | y             | z             |
|------|-------|---------------|---------------|---------------|
| ---- | ----- | -----         | -----         | -----         |
| 1    | H25   | -3.663028E-05 | -4.741978E-04 | -2.663808E-06 |
| 2    | C1    | 1.768989E-03  | 1.189622E-03  | -1.943889E-03 |
| 3    | C2    | 5.134526E-04  | 2.093609E-03  | 7.119634E-04  |
| 4    | C3    | 3.709753E-05  | -3.975426E-04 | 1.050316E-03  |
| 5    | C4    | -2.159458E-04 | -2.337768E-03 | -8.433983E-04 |
| 6    | C5    | 1.300080E-03  | -4.217482E-04 | -1.146168E-03 |
| 7    | C6    | -1.637070E-04 | -2.997039E-04 | 5.815640E-04  |
| 8    | C7    | -3.269365E-04 | 1.671040E-03  | -7.650070E-04 |
| 9    | H27   | -2.682197E-04 | -1.393285E-05 | 3.352124E-04  |
| 10   | H28   | -8.821173E-04 | -3.417881E-04 | 3.534498E-04  |
| 11   | H30   | -2.756155E-04 | -1.012351E-03 | -3.042168E-04 |
| 12   | C8    | -3.662004E-04 | 1.999609E-04  | 4.930198E-04  |
| 13   | H32   | 1.705535E-04  | 6.631806E-04  | -1.114962E-04 |
| 14   | C10   | 1.104105E-03  | -1.601743E-03 | -1.406674E-03 |
| 15   | N2    | -2.398230E-03 | -2.024751E-03 | 6.361978E-05  |
| 16   | C9    | -3.679754E-03 | -2.338797E-03 | 1.548841E-03  |
| 17   | O1    | 5.788842E-03  | 3.498514E-03  | -1.773722E-03 |
| 18   | H43   | 1.312289E-03  | 1.491637E-03  | 4.477060E-04  |
| 19   | C12   | 1.627440E-03  | -2.106577E-03 | -1.205476E-04 |
| 20   | C11   | -4.805831E-04 | -1.320863E-03 | 2.226307E-03  |
| 21   | C18   | -1.280678E-03 | 9.406960E-04  | 1.220578E-03  |
| 22   | H48   | -1.295742E-03 | 1.915519E-03  | -2.123247E-03 |
| 23   | C13   | -7.375047E-04 | 1.246492E-03  | -3.371602E-03 |
| 24   | C14   | -3.482536E-04 | 9.602880E-04  | -4.804191E-04 |
| 25   | C15   | -1.552890E-03 | -1.058338E-04 | 1.001914E-03  |
| 26   | C16   | 4.891969E-04  | -1.570713E-04 | 4.471378E-03  |
| 27   | C17   | 1.638560E-03  | -9.913141E-04 | 7.867225E-04  |
| 28   | H51   | -1.535195E-03 | 3.173970E-04  | 3.227441E-04  |
| 29   | H52   | -6.644208E-04 | 8.294817E-04  | -3.524280E-03 |
| 30   | H55   | 6.110513E-04  | -4.765425E-04 | 1.975115E-03  |
| 31   | H56   | -2.029590E-03 | -3.676835E-04 | 1.693869E-03  |
| 32   | H59   | 2.310703E-03  | 4.517719E-04  | -2.035586E-03 |
| 33   | H60   | 3.659181E-04  | -7.000803E-04 | -3.797985E-05 |
| 34   | H61   | 1.162188E-03  | -7.353260E-05 | -2.462660E-04 |
| 35   | H62   | -3.812451E-04 | -2.221828E-04 | 3.111071E-04  |



```

-----
total      1.281007E-03  -3.167965E-04  -6.417356E-04

```

end of program derlb

start of program geopt 22

geometry optimization step 22

reading input hessian of dimension 105

in five columns format

reading input hessian of dimension 105

in five columns format

Hessian eigenvalues:

|              |             |             |             |             |
|--------------|-------------|-------------|-------------|-------------|
| -2.42667E-02 | 0.00000E+00 | 0.00000E+00 | 0.00000E+00 | 0.00000E+00 |
| 0.00000E+00  | 0.00000E+00 | 0.00000E+00 | 0.00000E+00 | 0.00000E+00 |
| 0.00000E+00  | 0.00000E+00 | 0.00000E+00 | 0.00000E+00 | 0.00000E+00 |
| 0.00000E+00  | 0.00000E+00 | 0.00000E+00 | 0.00000E+00 | 0.00000E+00 |
| 0.00000E+00  | 0.00000E+00 | 0.00000E+00 | 0.00000E+00 | 0.00000E+00 |
| 0.00000E+00  | 0.00000E+00 | 5.00000E-04 | 9.09872E-03 | 1.68957E-02 |
| 2.07508E-02  | 2.81801E-02 | 3.03422E-02 | 3.07550E-02 | 3.12153E-02 |
| 3.17552E-02  | 3.68292E-02 | 3.81138E-02 | 4.50996E-02 | 4.64393E-02 |
| 5.78097E-02  | 6.26703E-02 | 6.85846E-02 | 7.15560E-02 | 7.31183E-02 |
| 7.76495E-02  | 8.65580E-02 | 9.89387E-02 | 9.91277E-02 | 1.04731E-01 |
| 1.13246E-01  | 1.21523E-01 | 1.26560E-01 | 1.38741E-01 | 1.43114E-01 |
| 1.44343E-01  | 1.44978E-01 | 1.49351E-01 | 1.54851E-01 | 1.58970E-01 |
| 1.60949E-01  | 1.66894E-01 | 1.73009E-01 | 1.82222E-01 | 1.86723E-01 |
| 1.87702E-01  | 2.00069E-01 | 2.06350E-01 | 2.12569E-01 | 2.16172E-01 |
| 2.23879E-01  | 2.28912E-01 | 2.31548E-01 | 2.43107E-01 | 2.46820E-01 |
| 2.50927E-01  | 2.61339E-01 | 2.64429E-01 | 2.72875E-01 | 2.82267E-01 |
| 2.91075E-01  | 2.93603E-01 | 2.96301E-01 | 3.04250E-01 | 3.08131E-01 |
| 3.19085E-01  | 3.19940E-01 | 3.26975E-01 | 3.29080E-01 | 3.33960E-01 |
| 3.35376E-01  | 3.39029E-01 | 3.43514E-01 | 3.53400E-01 | 3.56274E-01 |
| 3.62607E-01  | 3.76510E-01 | 3.83476E-01 | 3.89809E-01 | 3.96256E-01 |
| 4.09023E-01  | 4.12220E-01 | 4.20393E-01 | 4.22298E-01 | 4.38301E-01 |
| 4.40025E-01  | 4.50030E-01 | 4.66634E-01 | 4.71353E-01 | 4.80036E-01 |
| 4.84496E-01  | 5.00048E-01 | 5.09121E-01 | 5.34311E-01 | 5.42539E-01 |
| 5.76385E-01  | 6.13798E-01 | 6.36938E-01 | 6.39193E-01 | 6.46659E-01 |
| 7.01880E-01  | 7.49040E-01 | 8.85182E-01 | 1.03105E+00 | 1.40722E+00 |

WARNING: Hessian has wrong number of negative eigenvalues

Level shifts adjusted to satisfy step-size constraints

Step size: 0.0539963

Cos(theta): 0.6862566

Final level shift: -7.0368007E-02

energy change: -1.4618E-04 . ( 5.0000E-05 )

gradient maximum: 6.9454E-03 . ( 4.5000E-04 )

gradient rms: 1.3878E-03 . ( 3.0000E-04 )

step size: 0.05400 trust radius: 0.05303

displacement maximum: 1.7436E-02 . ( 1.8000E-03 )

displacement rms: 4.8296E-03 . ( 1.2000E-03 )

predicted energy change: -3.9020E-04 geom step: 5.3996E-02 full step:  
5.3996E-02

molecular structure not yet converged...

center of mass moved by:

x: 2.5419E-03 y: -1.6432E-03 z: -1.6400E-03

new geometry:

|      | angstroms     |               |               |
|------|---------------|---------------|---------------|
| atom | x             | y             | z             |
| H25  | 0.8884538578  | -3.8546497541 | -2.3642824164 |
| C1   | 1.4877437387  | -2.9705683923 | -2.2648093682 |
| C2   | 3.0896507854  | -0.6506169450 | -2.0244049569 |
| C3   | 1.1382225120  | -1.9736595798 | -1.3617245322 |
| C4   | 2.6222283120  | -2.7991996328 | -3.0363580650 |
| C5   | 3.4160785682  | -1.6529841346 | -2.9168688092 |
| C6   | 1.9503258271  | -0.8321650674 | -1.2637104236 |
| C7   | 0.0398042963  | -1.8148177912 | -0.4027903654 |
| H27  | 2.9021888182  | -3.5586304493 | -3.7391179231 |
| H28  | 4.2908900859  | -1.5527127596 | -3.5269412233 |
| H30  | 3.6760350861  | 0.2377259210  | -1.9048715984 |
| C8   | 0.2215346279  | -0.6320109922 | 0.1999037170  |
| H32  | -0.7513599989 | -2.5091251661 | -0.2323600125 |
| C10  | -0.3881809090 | 0.2511095606  | 1.2644681776  |
| N2   | 1.3735118735  | -0.0225580417 | -0.3020162357 |
| C9   | 1.6953969332  | 1.1810673550  | 0.2741793912  |
| O1   | 2.6838611879  | 1.8357220869  | 0.0331759728  |
| H43  | -0.3379422117 | -0.2517350785 | 2.2223966386  |
| C12  | -1.8339793987 | 0.6181641607  | 0.9736595073  |
| C11  | 0.5743457409  | 1.4947590106  | 1.2759840099  |
| C18  | 1.1826140372  | 1.8076754101  | 2.6546355948  |
| H48  | 0.0423660212  | 2.3672369893  | 0.9158193967  |
| C13  | -3.5282443906 | 1.3953573285  | -0.5477565081 |
| C14  | -4.1100626432 | 0.8877245024  | 1.7195059183  |
| C15  | -4.4810535311 | 1.3173737679  | 0.4593099000  |
| C16  | -2.7909675515 | 0.5397664110  | 1.9732356902  |
| C17  | -2.2158336557 | 1.0470279021  | -0.2926541025 |
| H51  | -5.4987251921 | 1.5843431929  | 0.2571539827  |
| H52  | -2.5114201154 | 0.2063544041  | 2.9533174017  |
| H55  | -3.8110587708 | 1.7200037405  | -1.5301723099 |
| H56  | -4.8382452667 | 0.8205590546  | 2.5018736076  |
| H59  | -1.4881395469 | 1.0897489686  | -1.0794431268 |
| H60  | 1.6771465982  | 0.9289129315  | 3.0674156735  |
| H61  | 0.4073950200  | 2.1311251598  | 3.3484187455  |
| H62  | 1.9144730860  | 2.5997411565  | 2.5507483064  |

nuclear repulsion energy..... 1442.806977358 hartrees

/ end of geometry optimization iteration 22 /

end of program geopt

start of program onee  
smallest eigenvalue of S: 1.221E-03  
number of canonical orbitals..... 210  
end of program onee

start of program probe  
end of program probe

start of program grid

number of gridpoints:  
atom H25 C1 C2 C3 C4 C5 C6 C7

|          |     |     |     |     |     |     |     |     |
|----------|-----|-----|-----|-----|-----|-----|-----|-----|
| grid # 1 | 73  | 89  | 87  | 90  | 87  | 87  | 85  | 85  |
| grid # 2 | 106 | 100 | 97  | 98  | 98  | 99  | 90  | 92  |
| grid # 3 | 224 | 183 | 184 | 194 | 182 | 182 | 188 | 183 |
| grid # 4 | 224 | 379 | 383 | 404 | 379 | 379 | 375 | 378 |

number of gridpoints:

|          |     |     |     |     |     |     |     |     |
|----------|-----|-----|-----|-----|-----|-----|-----|-----|
| atom     | H27 | H28 | H30 | C8  | H32 | C10 | N2  | C9  |
| grid # 1 | 73  | 73  | 73  | 86  | 73  | 82  | 99  | 75  |
| grid # 2 | 106 | 106 | 105 | 91  | 106 | 93  | 109 | 80  |
| grid # 3 | 224 | 224 | 220 | 187 | 223 | 175 | 224 | 164 |
| grid # 4 | 224 | 224 | 219 | 374 | 229 | 348 | 400 | 333 |

number of gridpoints:

|          |     |     |     |     |     |     |     |     |
|----------|-----|-----|-----|-----|-----|-----|-----|-----|
| atom     | O1  | H43 | C12 | C11 | C18 | H48 | C13 | C14 |
| grid # 1 | 111 | 69  | 90  | 81  | 71  | 69  | 88  | 87  |
| grid # 2 | 127 | 96  | 105 | 93  | 75  | 99  | 100 | 100 |
| grid # 3 | 272 | 210 | 194 | 171 | 149 | 216 | 183 | 183 |
| grid # 4 | 474 | 201 | 401 | 352 | 308 | 207 | 380 | 379 |

number of gridpoints:

|          |     |     |     |     |     |     |     |     |
|----------|-----|-----|-----|-----|-----|-----|-----|-----|
| atom     | C15 | C16 | C17 | H51 | H52 | H55 | H56 | H59 |
| grid # 1 | 88  | 87  | 85  | 73  | 73  | 73  | 73  | 70  |
| grid # 2 | 100 | 100 | 96  | 106 | 103 | 106 | 106 | 102 |
| grid # 3 | 183 | 182 | 181 | 224 | 215 | 224 | 224 | 215 |
| grid # 4 | 379 | 378 | 377 | 224 | 214 | 224 | 224 | 211 |

number of gridpoints:

|          |     |     |     |       |
|----------|-----|-----|-----|-------|
| atom     | H60 | H61 | H62 | total |
| grid # 1 | 71  | 72  | 71  | 2819  |
| grid # 2 | 99  | 99  | 99  | 3487  |
| grid # 3 | 217 | 221 | 220 | 7045  |
| grid # 4 | 222 | 225 | 221 | 10853 |

end of program grid

start of program rwr

recomputing RwR matrix 15 grid: 4

end of program rwr

start of program scf

|      |   |   |   |   |   |                  |               |                                |
|------|---|---|---|---|---|------------------|---------------|--------------------------------|
|      | i | u | d | i | g |                  |               |                                |
|      | t | p | i | c | r |                  |               |                                |
|      | e | d | i | u | i |                  |               |                                |
|      | r | t | s | t | d | total energy     | energy change | RMS density maximum DIIS error |
| etot | 1 | N | N | 1 | U | -815.14218412194 |               | 1.2E-04 1.8E-03                |
| etot | 2 | Y | Y | 4 | M | -815.14261906998 | 4.3E-04       | 4.1E-05 7.0E-04                |
| etot | 3 | Y | Y | 4 | M | -815.14266175783 | 4.3E-05       | 1.4E-05 2.5E-04                |
| etot | 4 | Y | Y | 4 | M | -815.14266711775 | 5.4E-06       | 6.3E-06 9.5E-05                |
| etot | 5 | Y | Y | 4 | M | -815.14266759708 | 4.8E-07       | 1.9E-06 2.7E-05                |
| etot | 6 | N | N | 1 | U | -815.14266679234 | -8.0E-07      | 0.0E+00 0.0E+00                |

Energy components, in hartrees:

|     |                               |                   |       |
|-----|-------------------------------|-------------------|-------|
| (A) | Nuclear repulsion.....        | 1442.80697735765  |       |
| (E) | Total one-electron terms..... | -3971.10637949937 |       |
| (I) | Total two-electron terms..... | 1713.15673534938  |       |
| (L) | Electronic energy.....        | -2257.94964414999 | (E+I) |
| (N) | Total energy.....             | -815.14266679234  | (A+L) |

SCFE: SCF energy: HF -815.14266679234 hartrees iterations: 6

HOMO energy: -0.29699  
LUMO energy: 0.11836

Orbital energies:

|           |           |           |           |           |           |
|-----------|-----------|-----------|-----------|-----------|-----------|
| -20.45253 | -15.55245 | -11.32162 | -11.23614 | -11.22293 | -11.21402 |
| -11.20731 | -11.20103 | -11.18814 | -11.18655 | -11.18594 | -11.18565 |
| -11.18404 | -11.18384 | -11.17941 | -11.17737 | -11.17726 | -11.17641 |
| -11.17589 | -11.17271 | -1.42289  | -1.33288  | -1.18039  | -1.16214  |
| -1.11495  | -1.08826  | -1.04056  | -1.02790  | -1.01971  | -1.00030  |
| -0.94659  | -0.90584  | -0.85396  | -0.84411  | -0.83184  | -0.81092  |
| -0.79391  | -0.76140  | -0.72093  | -0.69139  | -0.67860  | -0.66883  |
| -0.65803  | -0.64074  | -0.64016  | -0.62685  | -0.61145  | -0.60559  |
| -0.60377  | -0.60203  | -0.59180  | -0.57765  | -0.55683  | -0.55514  |
| -0.53849  | -0.53132  | -0.51659  | -0.50757  | -0.50003  | -0.49615  |
| -0.49129  | -0.48589  | -0.45906  | -0.42231  | -0.39362  | -0.34987  |
| -0.34268  | -0.31500  | -0.29699  | 0.11836   | 0.13412   | 0.13872   |
| 0.14201   | 0.20504   | 0.22553   | 0.26446   | 0.27103   | 0.27380   |
| 0.29957   |           |           |           |           |           |

end of program scf

start of program derla  
end of program derla

start of program rwr  
recomputing Rwr matrix 15 grid: 4  
end of program rwr

start of program derlb

forces (hartrees/bohr) : total

| atom | label | x             | y             | z             |
|------|-------|---------------|---------------|---------------|
| 1    | H25   | 3.192333E-04  | 5.326342E-04  | 1.806305E-04  |
| 2    | C1    | -1.223526E-04 | 5.697246E-04  | -4.494685E-04 |
| 3    | C2    | -4.547650E-04 | -1.413896E-04 | -1.481679E-04 |
| 4    | C3    | 1.408441E-03  | 2.342490E-04  | -9.902121E-05 |
| 5    | C4    | -2.730675E-04 | 3.437948E-04  | 8.181828E-04  |
| 6    | C5    | -1.136605E-03 | 1.659947E-04  | 8.484056E-04  |
| 7    | C6    | 4.782418E-04  | -1.631313E-03 | -1.322041E-04 |
| 8    | C7    | -3.147908E-04 | 4.820229E-04  | -1.324488E-03 |
| 9    | H27   | 1.492729E-04  | 1.752891E-04  | 8.616813E-05  |
| 10   | H28   | 1.345701E-04  | 3.547692E-06  | -1.472583E-04 |
| 11   | H30   | -3.223086E-04 | -1.102190E-03 | -1.533227E-04 |
| 12   | C8    | 5.326385E-04  | 3.700578E-04  | 3.846201E-04  |
| 13   | H32   | 3.015810E-04  | 5.346964E-04  | -2.850694E-04 |
| 14   | C10   | 9.861856E-04  | -2.389510E-04 | 2.637073E-04  |
| 15   | N2    | -1.193228E-03 | -7.268826E-04 | -7.515909E-05 |
| 16   | C9    | 9.922477E-04  | 1.211180E-03  | 4.237352E-04  |
| 17   | O1    | -9.457376E-04 | -6.529947E-04 | 4.502855E-04  |
| 18   | H43   | 4.518899E-04  | 2.314445E-04  | 3.095807E-05  |
| 19   | C12   | -1.207821E-05 | -9.158280E-04 | 4.552698E-04  |
| 20   | C11   | -7.892053E-04 | 7.972653E-04  | 9.197864E-04  |
| 21   | C18   | -1.578750E-03 | -1.104875E-03 | 2.292974E-03  |

|       |       |               |               |               |
|-------|-------|---------------|---------------|---------------|
| 22    | H48   | 8.825922E-04  | -8.658837E-04 | -3.960822E-04 |
| 23    | C13   | -3.392289E-04 | 1.218595E-04  | 7.891205E-05  |
| 24    | C14   | 1.224961E-03  | 3.408026E-04  | -9.626915E-04 |
| 25    | C15   | 7.787939E-04  | -5.118233E-05 | -6.734334E-04 |
| 26    | C16   | 2.217550E-04  | 7.968759E-04  | -6.557962E-04 |
| 27    | C17   | -4.129834E-04 | 4.066402E-05  | 2.075776E-04  |
| 28    | H51   | -2.091311E-04 | 6.187455E-05  | 4.319105E-05  |
| 29    | H52   | 1.707936E-04  | -4.145325E-04 | 3.597738E-04  |
| 30    | H55   | 6.950949E-05  | -6.297227E-05 | 6.339366E-04  |
| 31    | H56   | -4.453699E-04 | -9.292177E-05 | 5.135813E-04  |
| 32    | H59   | -2.942846E-04 | 4.357988E-05  | 1.734875E-04  |
| 33    | H60   | -1.647601E-03 | 3.205569E-03  | -1.800439E-03 |
| 34    | H61   | 3.089146E-03  | -1.329657E-03 | -2.749993E-03 |
| 35    | H62   | -2.369505E-04 | -6.183610E-04 | 6.287088E-04  |
| ----- |       |               |               |               |
|       | total | 1.463415E-03  | 3.131936E-04  | -2.587033E-04 |

end of program derlb

start of program geopt 23

geometry optimization step 23  
reading input hessian of dimension 105  
in five columns format  
reading input hessian of dimension 105  
in five columns format

Hessian eigenvalues:

|              |             |             |             |             |
|--------------|-------------|-------------|-------------|-------------|
| -3.83606E-02 | 0.00000E+00 | 0.00000E+00 | 0.00000E+00 | 0.00000E+00 |
| 0.00000E+00  | 0.00000E+00 | 0.00000E+00 | 0.00000E+00 | 0.00000E+00 |
| 0.00000E+00  | 0.00000E+00 | 0.00000E+00 | 0.00000E+00 | 0.00000E+00 |
| 0.00000E+00  | 0.00000E+00 | 0.00000E+00 | 0.00000E+00 | 0.00000E+00 |
| 0.00000E+00  | 0.00000E+00 | 0.00000E+00 | 0.00000E+00 | 0.00000E+00 |
| 0.00000E+00  | 0.00000E+00 | 5.90629E-04 | 5.38054E-03 | 2.15963E-02 |
| 2.48849E-02  | 2.81962E-02 | 3.06522E-02 | 3.09594E-02 | 3.11644E-02 |
| 3.20400E-02  | 3.73883E-02 | 3.85046E-02 | 4.44754E-02 | 4.90746E-02 |
| 5.80580E-02  | 6.59110E-02 | 6.87646E-02 | 7.35102E-02 | 7.51973E-02 |
| 7.93701E-02  | 8.70959E-02 | 9.49946E-02 | 1.01766E-01 | 1.13106E-01 |
| 1.21173E-01  | 1.24897E-01 | 1.34824E-01 | 1.37962E-01 | 1.41576E-01 |
| 1.43074E-01  | 1.47719E-01 | 1.49593E-01 | 1.55546E-01 | 1.62882E-01 |
| 1.71373E-01  | 1.75551E-01 | 1.79623E-01 | 1.81773E-01 | 1.87302E-01 |
| 1.93500E-01  | 2.02365E-01 | 2.09047E-01 | 2.13942E-01 | 2.16037E-01 |
| 2.20427E-01  | 2.29755E-01 | 2.36331E-01 | 2.41740E-01 | 2.48141E-01 |
| 2.55973E-01  | 2.59793E-01 | 2.61140E-01 | 2.71653E-01 | 2.81628E-01 |
| 2.89383E-01  | 2.94682E-01 | 2.97165E-01 | 3.05934E-01 | 3.09721E-01 |
| 3.17542E-01  | 3.19086E-01 | 3.25104E-01 | 3.26599E-01 | 3.35271E-01 |
| 3.38210E-01  | 3.43633E-01 | 3.50775E-01 | 3.53050E-01 | 3.57023E-01 |
| 3.67772E-01  | 3.72420E-01 | 3.78827E-01 | 3.92021E-01 | 3.98098E-01 |
| 4.01745E-01  | 4.09171E-01 | 4.14721E-01 | 4.30055E-01 | 4.39270E-01 |
| 4.52731E-01  | 4.53933E-01 | 4.57689E-01 | 4.72318E-01 | 4.77204E-01 |
| 4.89326E-01  | 4.96022E-01 | 5.14614E-01 | 5.51225E-01 | 5.69792E-01 |
| 5.70496E-01  | 5.85849E-01 | 6.28370E-01 | 6.43699E-01 | 6.67694E-01 |
| 7.34277E-01  | 7.50423E-01 | 8.70012E-01 | 1.11027E+00 | 1.42349E+00 |

WARNING: Hessian has wrong number of negative eigenvalues

Level shifts adjusted to satisfy step-size constraints

Step size: 0.0271616  
Cos(theta): 0.8629647

Final level shift: -2.2188195E-01

energy change: 5.1038E-05 . ( 5.0000E-05 )  
 gradient maximum: 4.2912E-03 . ( 4.5000E-04 )  
 gradient rms: 7.9961E-04 . ( 3.0000E-04 )  
 step size: 0.02716 trust radius: 0.02652  
 displacement maximum: 1.1158E-02 . ( 1.8000E-03 )  
 displacement rms: 2.4294E-03 . ( 1.2000E-03 )  
 predicted energy change: -1.8662E-04 geom step: 2.7162E-02 full step:  
 2.7162E-02  
 molecular structure not yet converged...

center of mass moved by:  
 x: 1.0275E-03 y: -3.2369E-04 z: 1.0144E-04

new geometry:

|      | angstroms     |               |               |
|------|---------------|---------------|---------------|
| atom | x             | y             | z             |
| H25  | 0.8855316275  | -3.8501435885 | -2.3697838860 |
| C1   | 1.4881065953  | -2.9690946966 | -2.2680407168 |
| C2   | 3.0977118448  | -0.6575709608 | -2.0183515248 |
| C3   | 1.1405572337  | -1.9723653909 | -1.3652727053 |
| C4   | 2.6256583400  | -2.8020469368 | -3.0338827965 |
| C5   | 3.4235151369  | -1.6598287127 | -2.9095108156 |
| C6   | 1.9548788502  | -0.8351491275 | -1.2627895953 |
| C7   | 0.0396523966  | -1.8093992311 | -0.4119793029 |
| H27  | 2.9058129802  | -3.5614021566 | -3.7368400291 |
| H28  | 4.3017609904  | -1.5623717163 | -3.5154666903 |
| H30  | 3.6885116848  | 0.2263702812  | -1.8959784481 |
| C8   | 0.2223236485  | -0.6296174442 | 0.1949275267  |
| H32  | -0.7563587481 | -2.4987097194 | -0.2469347629 |
| C10  | -0.3881456189 | 0.2513134764  | 1.2593184134  |
| N2   | 1.3745783567  | -0.0221441650 | -0.3046974115 |
| C9   | 1.6940135878  | 1.1820679276  | 0.2726050247  |
| O1   | 2.6818691326  | 1.8350823541  | 0.0356531122  |
| H43  | -0.3373783363 | -0.2517836993 | 2.2166695333  |
| C12  | -1.8340083048 | 0.6171898812  | 0.9703214234  |
| C11  | 0.5715665356  | 1.4958844750  | 1.2710744448  |
| C18  | 1.1743249208  | 1.8099673398  | 2.6484123960  |
| H48  | 0.0409955095  | 2.3654168104  | 0.9047710840  |
| C13  | -3.5353164762 | 1.4004933995  | -0.5397977607 |
| C14  | -4.1084417269 | 0.8854500552  | 1.7259436883  |
| C15  | -4.4845805943 | 1.3190196505  | 0.4702810819  |
| C16  | -2.7878859383 | 0.5367591123  | 1.9726712837  |
| C17  | -2.2211070324 | 1.0507633158  | -0.2921606858 |
| H51  | -5.5041410900 | 1.5867223309  | 0.2742793914  |
| H52  | -2.5045735140 | 0.2019692575  | 2.9508041880  |
| H55  | -3.8218281047 | 1.7286609883  | -1.5188262312 |
| H56  | -4.8348297148 | 0.8146355874  | 2.5119259870  |
| H59  | -1.4955665056 | 1.0996635369  | -1.0823560577 |
| H60  | 1.6673565144  | 0.9362593560  | 3.0587483135  |
| H61  | 0.4011968279  | 2.1274593522  | 3.3380208731  |
| H62  | 1.9042615917  | 2.6025395255  | 2.5492825245  |

nuclear repulsion energy..... 1443.237806597 hartrees

/ end of geometry optimization iteration 23 /

end of program geopt

```

start of program onee
smallest eigenvalue of S:    1.211E-03
number of canonical orbitals.....      210
end of program onee

```

```

start of program probe
end of program probe

```

```

start of program grid

```

```

number of gridpoints:

```

| atom     | H25 | C1  | C2  | C3  | C4  | C5  | C6  | C7  |
|----------|-----|-----|-----|-----|-----|-----|-----|-----|
| grid # 1 | 73  | 89  | 87  | 90  | 87  | 87  | 85  | 85  |
| grid # 2 | 106 | 100 | 97  | 98  | 98  | 99  | 91  | 92  |
| grid # 3 | 224 | 183 | 182 | 194 | 182 | 182 | 188 | 183 |
| grid # 4 | 224 | 379 | 383 | 404 | 379 | 379 | 372 | 378 |

```

number of gridpoints:

```

| atom     | H27 | H28 | H30 | C8  | H32 | C10 | N2  | C9  |
|----------|-----|-----|-----|-----|-----|-----|-----|-----|
| grid # 1 | 73  | 73  | 73  | 86  | 73  | 82  | 99  | 75  |
| grid # 2 | 106 | 106 | 105 | 91  | 106 | 93  | 109 | 80  |
| grid # 3 | 224 | 224 | 220 | 187 | 223 | 175 | 224 | 164 |
| grid # 4 | 224 | 224 | 219 | 374 | 228 | 349 | 402 | 332 |

```

number of gridpoints:

```

| atom     | O1  | H43 | C12 | C11 | C18 | H48 | C13 | C14 |
|----------|-----|-----|-----|-----|-----|-----|-----|-----|
| grid # 1 | 111 | 69  | 90  | 81  | 71  | 69  | 87  | 87  |
| grid # 2 | 123 | 96  | 106 | 93  | 75  | 99  | 100 | 100 |
| grid # 3 | 272 | 210 | 193 | 172 | 141 | 216 | 183 | 183 |
| grid # 4 | 473 | 201 | 398 | 355 | 308 | 209 | 379 | 379 |

```

number of gridpoints:

```

| atom     | C15 | C16 | C17 | H51 | H52 | H55 | H56 | H59 |
|----------|-----|-----|-----|-----|-----|-----|-----|-----|
| grid # 1 | 88  | 87  | 85  | 73  | 73  | 73  | 73  | 70  |
| grid # 2 | 99  | 100 | 98  | 106 | 103 | 106 | 106 | 102 |
| grid # 3 | 183 | 182 | 181 | 224 | 215 | 224 | 224 | 215 |
| grid # 4 | 379 | 378 | 377 | 224 | 214 | 224 | 224 | 211 |

```

number of gridpoints:

```

| atom     | H60 | H61 | H62 | total |
|----------|-----|-----|-----|-------|
| grid # 1 | 71  | 72  | 71  | 2818  |
| grid # 2 | 99  | 99  | 99  | 3486  |
| grid # 3 | 217 | 221 | 220 | 7035  |
| grid # 4 | 218 | 222 | 221 | 10844 |

```

end of program grid

```

```

start of program rwr
recomputing RwR matrix 15      grid:  4
end of program rwr

```

```

start of program scf

```

| i | u | d | i | g |              |               |                                       |
|---|---|---|---|---|--------------|---------------|---------------------------------------|
| t | p | i | c | r |              |               |                                       |
| e | d | i | u | i |              |               |                                       |
| r | t | s | t | d | total energy | energy change | RMS density change maximum DIIS error |

|      |   |   |   |   |   |                  |         |         |         |
|------|---|---|---|---|---|------------------|---------|---------|---------|
| etot | 1 | N | N | 1 | U | -815.14257620959 |         | 7.4E-05 | 1.8E-03 |
| etot | 2 | Y | Y | 4 | M | -815.14276636194 | 1.9E-04 | 2.5E-05 | 7.5E-04 |
| etot | 3 | Y | Y | 4 | M | -815.14278623418 | 2.0E-05 | 8.8E-06 | 2.5E-04 |
| etot | 4 | Y | Y | 4 | M | -815.14278832808 | 2.1E-06 | 4.1E-06 | 1.1E-04 |
| etot | 5 | Y | N | 4 | M | -815.14278906639 | 7.4E-07 | 0.0E+00 | 0.0E+00 |

Energy components, in hartrees:

|     |                               |                   |       |
|-----|-------------------------------|-------------------|-------|
| (A) | Nuclear repulsion.....        | 1443.23780659711  |       |
| (E) | Total one-electron terms..... | -3971.95568885951 |       |
| (I) | Total two-electron terms..... | 1713.57509319601  |       |
| (L) | Electronic energy.....        | -2258.38059566350 | (E+I) |
| (N) | Total energy.....             | -815.14278906639  | (A+L) |

SCFE: SCF energy: HF -815.14278906639 hartrees iterations: 5

HOMO energy: -0.29688

LUMO energy: 0.11877

Orbital energies:

|           |           |           |           |           |           |
|-----------|-----------|-----------|-----------|-----------|-----------|
| -20.45257 | -15.55196 | -11.32121 | -11.23553 | -11.22262 | -11.21375 |
| -11.20669 | -11.20095 | -11.18761 | -11.18645 | -11.18591 | -11.18560 |
| -11.18420 | -11.18381 | -11.17910 | -11.17698 | -11.17660 | -11.17559 |
| -11.17467 | -11.17247 | -1.42426  | -1.33326  | -1.18069  | -1.16267  |
| -1.11563  | -1.08827  | -1.04109  | -1.02766  | -1.02036  | -1.00058  |
| -0.94716  | -0.90610  | -0.85451  | -0.84413  | -0.83186  | -0.81102  |
| -0.79394  | -0.76171  | -0.72092  | -0.69200  | -0.67876  | -0.66908  |
| -0.65824  | -0.64069  | -0.64036  | -0.62704  | -0.61174  | -0.60612  |
| -0.60410  | -0.60177  | -0.59205  | -0.57801  | -0.55744  | -0.55580  |
| -0.53901  | -0.53181  | -0.51669  | -0.50777  | -0.50004  | -0.49657  |
| -0.49138  | -0.48608  | -0.45947  | -0.42233  | -0.39354  | -0.34968  |
| -0.34291  | -0.31525  | -0.29688  | 0.11877   | 0.13432   | 0.13893   |
| 0.14210   | 0.20560   | 0.22583   | 0.26446   | 0.27122   | 0.27408   |
| 0.29959   |           |           |           |           |           |

end of program scf

start of program derla

end of program derla

start of program rwr

recomputing RwR matrix 15 grid: 4

end of program rwr

start of program derlb

forces (hartrees/bohr) : total

| atom | label | x             | y             | z             |
|------|-------|---------------|---------------|---------------|
| 1    | H25   | 1.350579E-04  | 2.741675E-04  | 7.481409E-05  |
| 2    | C1    | -2.378481E-04 | -7.230226E-05 | -2.589889E-04 |
| 3    | C2    | -2.692388E-04 | 2.138113E-05  | 5.783063E-05  |
| 4    | C3    | 3.292319E-04  | 2.579849E-04  | 2.760825E-04  |
| 5    | C4    | 1.925447E-04  | -2.048571E-04 | -1.810400E-05 |
| 6    | C5    | -3.515494E-04 | 1.359277E-04  | 2.036013E-04  |
| 7    | C6    | 5.673017E-04  | 3.376347E-04  | 1.704376E-04  |
| 8    | C7    | -1.584157E-03 | -6.406681E-04 | -6.802053E-04 |



|       |       |               |               |               |
|-------|-------|---------------|---------------|---------------|
| 9     | H27   | 8.172896E-05  | 1.874937E-04  | 1.738475E-04  |
| 10    | H28   | -4.685708E-07 | -5.859149E-05 | -8.111187E-05 |
| 11    | H30   | -1.534611E-04 | -3.929726E-04 | -5.928572E-05 |
| 12    | C8    | 4.726562E-05  | 1.884753E-04  | -5.777532E-04 |
| 13    | H32   | 1.783034E-04  | 5.688829E-06  | -1.593956E-04 |
| 14    | C10   | 4.772527E-04  | -3.491906E-05 | -1.205943E-04 |
| 15    | N2    | -7.778618E-06 | -7.766610E-04 | 2.982370E-04  |
| 16    | C9    | -4.525494E-04 | -9.669624E-04 | 8.596498E-04  |
| 17    | O1    | 2.078895E-03  | 1.593225E-03  | -3.019907E-04 |
| 18    | H43   | 5.307163E-04  | 7.226982E-05  | 2.328912E-04  |
| 19    | C12   | -6.460192E-04 | -7.626877E-04 | 1.227142E-03  |
| 20    | C11   | -1.034918E-03 | 2.620373E-04  | -3.374878E-04 |
| 21    | C18   | -5.103751E-04 | 1.442696E-04  | -2.156988E-05 |
| 22    | H48   | 2.586969E-04  | -2.025763E-04 | -2.432985E-04 |
| 23    | C13   | 2.769440E-04  | -1.664652E-04 | 2.723611E-04  |
| 24    | C14   | 9.926921E-04  | -2.929296E-04 | 1.020283E-03  |
| 25    | C15   | 9.387157E-05  | 3.360789E-04  | -1.648624E-03 |
| 26    | C16   | -2.517079E-04 | 8.057617E-04  | -4.182559E-04 |
| 27    | C17   | -3.022872E-04 | 5.188546E-04  | -8.798559E-04 |
| 28    | H51   | 4.620089E-04  | -4.629588E-05 | -9.545173E-05 |
| 29    | H52   | 2.149477E-04  | -5.994828E-04 | 6.041814E-04  |
| 30    | H55   | -8.991934E-05 | 2.086922E-04  | -1.133807E-04 |
| 31    | H56   | 5.355338E-04  | 2.615741E-05  | -2.722817E-04 |
| 32    | H59   | -1.014874E-03 | -1.847225E-04 | 7.840525E-04  |
| 33    | H60   | 3.184770E-04  | -3.911398E-05 | -2.646256E-04 |
| 34    | H61   | 6.715510E-05  | 1.317919E-04  | -2.359414E-04 |
| 35    | H62   | 3.810810E-04  | 2.070301E-04  | 3.496000E-04  |
| ----- |       |               |               |               |
|       | total | 1.312555E-03  | 2.727143E-04  | -1.831912E-04 |

end of program derlb

start of program geopt 24

geometry optimization step 24

reading input hessian of dimension 105  
in five columns format

reading input hessian of dimension 105  
in five columns format

Hessian eigenvalues:

|              |             |             |             |             |
|--------------|-------------|-------------|-------------|-------------|
| -7.29006E-02 | 0.00000E+00 | 0.00000E+00 | 0.00000E+00 | 0.00000E+00 |
| 0.00000E+00  | 0.00000E+00 | 0.00000E+00 | 0.00000E+00 | 0.00000E+00 |
| 0.00000E+00  | 0.00000E+00 | 0.00000E+00 | 0.00000E+00 | 0.00000E+00 |
| 0.00000E+00  | 0.00000E+00 | 0.00000E+00 | 0.00000E+00 | 0.00000E+00 |
| 0.00000E+00  | 0.00000E+00 | 0.00000E+00 | 0.00000E+00 | 0.00000E+00 |
| 0.00000E+00  | 0.00000E+00 | 5.73260E-04 | 1.34656E-02 | 2.14066E-02 |
| 2.21309E-02  | 2.83999E-02 | 2.99087E-02 | 3.08451E-02 | 3.10436E-02 |
| 3.19254E-02  | 3.50439E-02 | 3.74082E-02 | 4.48327E-02 | 4.66508E-02 |
| 5.67245E-02  | 6.65260E-02 | 6.76234E-02 | 7.28251E-02 | 7.55252E-02 |
| 7.63163E-02  | 8.91777E-02 | 9.74103E-02 | 1.06375E-01 | 1.13290E-01 |
| 1.19272E-01  | 1.20977E-01 | 1.31824E-01 | 1.35690E-01 | 1.42984E-01 |
| 1.43389E-01  | 1.46309E-01 | 1.54007E-01 | 1.61558E-01 | 1.62648E-01 |
| 1.66493E-01  | 1.72578E-01 | 1.76020E-01 | 1.83375E-01 | 1.85976E-01 |
| 1.91468E-01  | 1.97171E-01 | 2.07283E-01 | 2.11965E-01 | 2.16621E-01 |
| 2.23719E-01  | 2.29699E-01 | 2.32056E-01 | 2.34680E-01 | 2.42720E-01 |
| 2.48272E-01  | 2.56464E-01 | 2.60525E-01 | 2.72567E-01 | 2.75181E-01 |
| 2.89315E-01  | 2.94360E-01 | 2.98094E-01 | 3.03244E-01 | 3.08641E-01 |
| 3.10024E-01  | 3.21458E-01 | 3.25847E-01 | 3.29838E-01 | 3.30575E-01 |
| 3.36093E-01  | 3.40151E-01 | 3.46141E-01 | 3.53085E-01 | 3.56451E-01 |
| 3.74074E-01  | 3.75596E-01 | 3.77891E-01 | 3.87332E-01 | 3.96742E-01 |

|             |             |             |             |             |
|-------------|-------------|-------------|-------------|-------------|
| 3.97290E-01 | 4.13952E-01 | 4.21425E-01 | 4.23358E-01 | 4.39971E-01 |
| 4.42365E-01 | 4.52813E-01 | 4.58712E-01 | 4.73893E-01 | 4.79189E-01 |
| 4.89555E-01 | 5.02894E-01 | 5.14075E-01 | 5.15455E-01 | 5.36270E-01 |
| 5.55222E-01 | 5.82251E-01 | 6.34084E-01 | 6.43248E-01 | 6.54151E-01 |
| 7.21341E-01 | 7.57830E-01 | 8.72071E-01 | 1.07051E+00 | 1.50566E+00 |

WARNING: Hessian has wrong number of negative eigenvalues

Level shifts adjusted to satisfy step-size constraints

Step size: 0.0136983

Cos(theta): 0.8599705

Final level shift: -2.6579083E-01

energy change: -1.2227E-04 . ( 5.0000E-05 )

gradient maximum: 2.5854E-03 . ( 4.5000E-04 )

gradient rms: 5.2685E-04 . ( 3.0000E-04 )

step size: 0.01370 trust radius: 0.01326

displacement maximum: 3.6148E-03 . ( 1.8000E-03 )

displacement rms: 1.2252E-03 . ( 1.2000E-03 )

predicted energy change: -5.9631E-05 geom step: 1.3698E-02 full step:  
1.3698E-02

molecular structure not yet converged...

center of mass moved by:

x: 1.0252E-03 y: -3.7445E-04 z: 8.9330E-04

new geometry:

|      | angstroms     |               |               |
|------|---------------|---------------|---------------|
| atom | x             | y             | z             |
| H25  | 0.8798105701  | -3.8456848703 | -2.3745928221 |
| C1   | 1.4842980031  | -2.9667989361 | -2.2711962489 |
| C2   | 3.0978997808  | -0.6596144279 | -2.0154376243 |
| C3   | 1.1387186146  | -1.9711480835 | -1.3668715961 |
| C4   | 2.6228462289  | -2.8003229729 | -3.0353626945 |
| C5   | 3.4219611474  | -1.6601712201 | -2.9080421729 |
| C6   | 1.9553039662  | -0.8362309983 | -1.2613393908 |
| C7   | 0.0359254693  | -1.8082864616 | -0.4151269583 |
| H27  | 2.9030811328  | -3.5578770209 | -3.7395872719 |
| H28  | 4.3004713859  | -1.5630614050 | -3.5138890617 |
| H30  | 3.6898574857  | 0.2221105267  | -1.8909535806 |
| C8   | 0.2213796612  | -0.6292950566 | 0.1933866751  |
| H32  | -0.7619197199 | -2.4961091825 | -0.2542076494 |
| C10  | -0.3879433315 | 0.2519247227  | 1.2589484983  |
| N2   | 1.3758383896  | -0.0230353950 | -0.3034358790 |
| C9   | 1.6977858741  | 1.1807132984  | 0.2750575054  |
| O1   | 2.6886526753  | 1.8328764008  | 0.0414295002  |
| H43  | -0.3371281304 | -0.2522642068 | 2.2160621435  |
| C12  | -1.8336014412 | 0.6187476622  | 0.9702691677  |
| C11  | 0.5722919734  | 1.4963267533  | 1.2705504360  |
| C18  | 1.1733731119  | 1.8142624982  | 2.6480597436  |
| H48  | 0.0424115319  | 2.3654730354  | 0.9026358643  |
| C13  | -3.5369789730 | 1.3975992477  | -0.5415977461 |
| C14  | -4.1060777398 | 0.8851158846  | 1.7256532102  |
| C15  | -4.4843836801 | 1.3165070472  | 0.4686146705  |
| C16  | -2.7858980327 | 0.5379584484  | 1.9731340493  |
| C17  | -2.2230748542 | 1.0499741729  | -0.2927803494 |
| H51  | -5.5042452477 | 1.5820251527  | 0.2728598875  |
| H52  | -2.5020012131 | 0.2002541030  | 2.9515511280  |
| H55  | -3.8249100282 | 1.7238932335  | -1.5209099076 |
| H56  | -4.8314696315 | 0.8141606778  | 2.5122962102  |

```

H59      -1.4999675272      1.0954471468      -1.0830604421
H60       1.6656850525      0.9421322637      3.0611637166
H61       0.3990610104      2.1345246802      3.3340330547
H62       1.9039810724      2.6068689543      2.5491819153

nuclear repulsion energy..... 1443.233524766 hartrees
-----
/  end of geometry optimization iteration  24  /
-----

end of program geopt

start of program onee
smallest eigenvalue of S:    1.208E-03
number of canonical orbitals.....      210
end of program onee

start of program probe
end of program probe

start of program grid

number of gridpoints:
  atom      H25      C1      C2      C3      C4      C5      C6      C7
grid # 1      73      89      87      90      87      87      85      85
grid # 2     106     100      97      98      98      98      91      92
grid # 3     224     183     182     194     182     182     187     183
grid # 4     224     379     380     406     379     379     372     377

number of gridpoints:
  atom      H27      H28      H30      C8      H32      C10      N2      C9
grid # 1      73      73      73      86      73      82      99      75
grid # 2     106     106     105      91     106      93     109      80
grid # 3     224     224     220     187     223     175     224     164
grid # 4     224     224     219     374     229     349     402     333

number of gridpoints:
  atom      O1      H43      C12      C11      C18      H48      C13      C14
grid # 1     111      69      90      81      71      69      88      87
grid # 2     127      96     105      93      76      99     100     100
grid # 3     272     210     193     173     148     216     183     183
grid # 4     474     201     400     356     306     208     379     379

number of gridpoints:
  atom      C15      C16      C17      H51      H52      H55      H56      H59
grid # 1      89      87      85      73      73      73      73      70
grid # 2     100     100      96     106     103     106     106     102
grid # 3     183     182     181     224     214     224     224     215
grid # 4     379     378     377     224     214     224     224     211

number of gridpoints:
  atom      H60      H61      H62      total
grid # 1      71      72      71     2820
grid # 2      99      99      99     3488
grid # 3     217     221     220     7041
grid # 4     218     222     221    10845

end of program grid

```

```

start of program rwr
recomputing RwR matrix 4 grid: 4
recomputing RwR matrix 15 grid: 4
end of program rwr

```

```

start of program scf

```

|      | i | u | d | i | g |                  | energy  | RMS     | maximum |
|------|---|---|---|---|---|------------------|---------|---------|---------|
|      | t | p | i | c | r |                  | change  | density | DIIS    |
|      | e | d | i | u | i |                  |         | change  | error   |
|      | r | t | s | t | d | total energy     |         |         |         |
| etot | 1 | N | N | 1 | U | -815.14278245545 |         | 5.8E-05 | 9.8E-04 |
| etot | 2 | Y | Y | 4 | M | -815.14283771100 | 5.5E-05 | 1.6E-05 | 4.0E-04 |
| etot | 3 | Y | Y | 4 | M | -815.14284471084 | 7.0E-06 | 5.9E-06 | 1.4E-04 |
| etot | 4 | Y | Y | 4 | M | -815.14284509616 | 3.9E-07 | 2.7E-06 | 5.8E-05 |
| etot | 5 | Y | N | 4 | M | -815.14284578473 | 6.9E-07 | 0.0E+00 | 0.0E+00 |

Energy components, in hartrees:

|     |                               |                   |       |
|-----|-------------------------------|-------------------|-------|
| (A) | Nuclear repulsion.....        | 1443.23352476568  |       |
| (E) | Total one-electron terms..... | -3971.94629468740 |       |
| (I) | Total two-electron terms..... | 1713.56992413699  |       |
| (L) | Electronic energy.....        | -2258.37637055041 | (E+I) |
| (N) | Total energy.....             | -815.14284578473  | (A+L) |

SCFE: SCF energy: HF -815.14284578473 hartrees iterations: 5

HOMO energy: -0.29693  
LUMO energy: 0.11878

Orbital energies:

|           |           |           |           |           |           |
|-----------|-----------|-----------|-----------|-----------|-----------|
| -20.45275 | -15.55220 | -11.32157 | -11.23579 | -11.22243 | -11.21387 |
| -11.20678 | -11.20090 | -11.18748 | -11.18645 | -11.18589 | -11.18544 |
| -11.18399 | -11.18374 | -11.17893 | -11.17678 | -11.17662 | -11.17535 |
| -11.17452 | -11.17229 | -1.42338  | -1.33315  | -1.18080  | -1.16287  |
| -1.11560  | -1.08835  | -1.04115  | -1.02786  | -1.02047  | -1.00061  |
| -0.94721  | -0.90617  | -0.85450  | -0.84423  | -0.83184  | -0.81111  |
| -0.79397  | -0.76191  | -0.72098  | -0.69205  | -0.67868  | -0.66907  |
| -0.65827  | -0.64062  | -0.64041  | -0.62715  | -0.61192  | -0.60609  |
| -0.60424  | -0.60183  | -0.59212  | -0.57807  | -0.55716  | -0.55571  |
| -0.53898  | -0.53190  | -0.51664  | -0.50772  | -0.49999  | -0.49661  |
| -0.49149  | -0.48609  | -0.45947  | -0.42239  | -0.39367  | -0.34986  |
| -0.34286  | -0.31533  | -0.29693  | 0.11878   | 0.13421   | 0.13897   |
| 0.14223   | 0.20547   | 0.22576   | 0.26446   | 0.27131   | 0.27417   |
| 0.29955   |           |           |           |           |           |

```

end of program scf

```

```

start of program derla
end of program derla

```

```

start of program rwr
recomputing RwR matrix 4 grid: 4
recomputing RwR matrix 15 grid: 4
end of program rwr

```

start of program derlb

forces (hartrees/bohr) : total

| atom  | label | x             | y             | z             |
|-------|-------|---------------|---------------|---------------|
| 1     | H25   | -4.693129E-05 | -8.955542E-05 | -3.947449E-05 |
| 2     | C1    | -3.400762E-05 | -1.115335E-04 | -2.973969E-04 |
| 3     | C2    | 2.873871E-05  | 5.530545E-05  | -8.613525E-05 |
| 4     | C3    | -2.896385E-04 | -3.505482E-04 | 2.538094E-04  |
| 5     | C4    | 1.343388E-05  | -3.899574E-04 | -8.270230E-05 |
| 6     | C5    | 5.542569E-04  | 3.568880E-05  | -5.237625E-04 |
| 7     | C6    | 2.191685E-04  | 5.807666E-04  | 4.014931E-04  |
| 8     | C7    | -8.780115E-04 | 2.671671E-04  | -7.346376E-04 |
| 9     | H27   | 4.797173E-05  | -1.153414E-04 | -1.696471E-05 |
| 10    | H28   | -2.318651E-05 | -5.102009E-05 | 9.860963E-06  |
| 11    | H30   | 2.791345E-04  | 2.282415E-04  | -1.913709E-05 |
| 12    | C8    | -2.506698E-04 | 4.859804E-04  | -2.613423E-05 |
| 13    | H32   | 5.615176E-05  | -3.484797E-06 | 3.726353E-05  |
| 14    | C10   | 6.312939E-04  | -6.380115E-05 | -4.457213E-04 |
| 15    | N2    | 3.107649E-04  | -5.898393E-04 | 4.845005E-04  |
| 16    | C9    | 3.817864E-04  | -1.815168E-04 | 5.098035E-04  |
| 17    | O1    | 1.546469E-06  | -1.238997E-04 | 5.519581E-06  |
| 18    | H43   | 5.281791E-04  | 2.455802E-04  | 7.357829E-05  |
| 19    | C12   | -4.430054E-04 | -8.794639E-04 | 6.425886E-04  |
| 20    | C11   | -3.528337E-04 | 3.858928E-04  | -2.068393E-04 |
| 21    | C18   | -4.086160E-04 | 4.829425E-04  | -3.522413E-04 |
| 22    | H48   | 2.638336E-04  | -2.130394E-04 | -4.614152E-04 |
| 23    | C13   | 3.231652E-04  | -2.843605E-05 | 1.413580E-04  |
| 24    | C14   | 7.585485E-05  | 2.002462E-06  | 5.584545E-04  |
| 25    | C15   | -1.510532E-04 | 4.869886E-05  | -5.007211E-05 |
| 26    | C16   | -2.632720E-04 | 3.620964E-04  | 3.487420E-04  |
| 27    | C17   | 1.113749E-04  | 5.330038E-05  | -1.284709E-04 |
| 28    | H51   | 2.097836E-04  | 4.897233E-06  | 2.629053E-05  |
| 29    | H52   | -8.817246E-05 | -3.232563E-05 | -2.360050E-04 |
| 30    | H55   | 7.280615E-05  | 1.230035E-04  | -1.132583E-04 |
| 31    | H56   | 2.771566E-04  | 4.430355E-05  | -2.838972E-04 |
| 32    | H59   | 5.369438E-06  | 3.164462E-05  | -7.975462E-05 |
| 33    | H60   | 3.761009E-04  | -3.527690E-04 | -4.450671E-05 |
| 34    | H61   | -2.077395E-04 | 1.030444E-04  | 2.206652E-04  |
| 35    | H62   | 1.277019E-04  | -3.674696E-05 | 1.110622E-04  |
| total |       | 1.458436E-03  | -7.272195E-05 | -4.035372E-04 |

end of program derlb

start of program geopt 25

geometry optimization step 25

reading input hessian of dimension 105  
in five columns format

reading input hessian of dimension 105  
in five columns format

Hessian eigenvalues:

|              |             |             |             |             |
|--------------|-------------|-------------|-------------|-------------|
| -1.82117E-01 | 0.00000E+00 | 0.00000E+00 | 0.00000E+00 | 0.00000E+00 |
| 0.00000E+00  | 0.00000E+00 | 0.00000E+00 | 0.00000E+00 | 0.00000E+00 |
| 0.00000E+00  | 0.00000E+00 | 0.00000E+00 | 0.00000E+00 | 0.00000E+00 |
| 0.00000E+00  | 0.00000E+00 | 0.00000E+00 | 0.00000E+00 | 0.00000E+00 |
| 0.00000E+00  | 0.00000E+00 | 0.00000E+00 | 0.00000E+00 | 0.00000E+00 |

|             |             |             |             |             |
|-------------|-------------|-------------|-------------|-------------|
| 0.00000E+00 | 0.00000E+00 | 6.52529E-04 | 7.41854E-03 | 1.84635E-02 |
| 2.19593E-02 | 2.82810E-02 | 3.07952E-02 | 3.09397E-02 | 3.13815E-02 |
| 3.21759E-02 | 3.70318E-02 | 3.78907E-02 | 4.45499E-02 | 4.74001E-02 |
| 5.61643E-02 | 6.64131E-02 | 6.84285E-02 | 7.27107E-02 | 7.31956E-02 |
| 7.78541E-02 | 8.31257E-02 | 8.79940E-02 | 9.75192E-02 | 1.01009E-01 |
| 1.13267E-01 | 1.17254E-01 | 1.22465E-01 | 1.32600E-01 | 1.40934E-01 |
| 1.42020E-01 | 1.44747E-01 | 1.51866E-01 | 1.52455E-01 | 1.59745E-01 |
| 1.60524E-01 | 1.71134E-01 | 1.75642E-01 | 1.80878E-01 | 1.86995E-01 |
| 1.88272E-01 | 1.96159E-01 | 2.03891E-01 | 2.08329E-01 | 2.14125E-01 |
| 2.16325E-01 | 2.27330E-01 | 2.31544E-01 | 2.38915E-01 | 2.45552E-01 |
| 2.47445E-01 | 2.56277E-01 | 2.60870E-01 | 2.74961E-01 | 2.82870E-01 |
| 2.88104E-01 | 2.93600E-01 | 2.99808E-01 | 3.07669E-01 | 3.10155E-01 |
| 3.19136E-01 | 3.21845E-01 | 3.22660E-01 | 3.30318E-01 | 3.34142E-01 |
| 3.37382E-01 | 3.40888E-01 | 3.46579E-01 | 3.55369E-01 | 3.56657E-01 |
| 3.59455E-01 | 3.69444E-01 | 3.75835E-01 | 3.83156E-01 | 3.98477E-01 |
| 4.02884E-01 | 4.06663E-01 | 4.15187E-01 | 4.27910E-01 | 4.39754E-01 |
| 4.42362E-01 | 4.57093E-01 | 4.60532E-01 | 4.73932E-01 | 4.79567E-01 |
| 4.86413E-01 | 4.92669E-01 | 5.02571E-01 | 5.18220E-01 | 5.31835E-01 |
| 5.81737E-01 | 6.22814E-01 | 6.33183E-01 | 6.43254E-01 | 6.75129E-01 |
| 7.26921E-01 | 7.62644E-01 | 9.14152E-01 | 1.05385E+00 | 1.41236E+00 |

WARNING: Hessian has wrong number of negative eigenvalues

Level shifts adjusted to satisfy step-size constraints

Step size: 0.0193202

Cos(theta): 0.7050332

Final level shift: -2.2503852E-01

energy change: -5.6718E-05 . ( 5.0000E-05 )

gradient maximum: 1.2011E-03 . ( 4.5000E-04 )

gradient rms: 2.9935E-04 \* ( 3.0000E-04 )

step size: 0.01932 trust radius: 0.01875

displacement maximum: 6.2298E-03 . ( 1.8000E-03 )

displacement rms: 1.7280E-03 . ( 1.2000E-03 )

predicted energy change: -6.4795E-05 geom step: 1.9320E-02 full step:  
1.9320E-02

molecular structure not yet converged...

center of mass moved by:

x: -2.5181E-04 y: -1.0610E-03 z: 9.4421E-04

new geometry:

|      | angstroms     |               |               |
|------|---------------|---------------|---------------|
| atom | x             | y             | z             |
| H25  | 0.8841756139  | -3.8451128079 | -2.3795592096 |
| C1   | 1.4879296826  | -2.9659977738 | -2.2737930892 |
| C2   | 3.1018943504  | -0.6607036755 | -2.0161313320 |
| C3   | 1.1383171520  | -1.9707973192 | -1.3698328867 |
| C4   | 2.6288812749  | -2.8004560371 | -3.0367062030 |
| C5   | 3.4280688933  | -1.6612984794 | -2.9088313835 |
| C6   | 1.9558508169  | -0.8357197208 | -1.2621017370 |
| C7   | 0.0334225028  | -1.8087360242 | -0.4200989883 |
| H27  | 2.9110068367  | -3.5580169192 | -3.7398497200 |
| H28  | 4.3069377004  | -1.5634243110 | -3.5126057552 |
| H30  | 3.6929270099  | 0.2217927325  | -1.8912047758 |
| C8   | 0.2182109361  | -0.6299838437 | 0.1903019831  |
| H32  | -0.7627238467 | -2.4986365935 | -0.2602937808 |
| C10  | -0.3906345666 | 0.2502214520  | 1.2562746241  |
| N2   | 1.3743100093  | -0.0244700072 | -0.3042321663 |
| C9   | 1.6973457886  | 1.1787296992  | 0.2764979684  |

|     |               |               |               |
|-----|---------------|---------------|---------------|
| O1  | 2.6930158166  | 1.8300973548  | 0.0477779367  |
| H43 | -0.3366406432 | -0.2525658007 | 2.2134897509  |
| C12 | -1.8369157955 | 0.6169948823  | 0.9717284713  |
| C11 | 0.5693903446  | 1.4948253541  | 1.2675289180  |
| C18 | 1.1702129061  | 1.8169705749  | 2.6429154796  |
| H48 | 0.0409065050  | 2.3612546844  | 0.8953812070  |
| C13 | -3.5371197893 | 1.3998631594  | -0.5385323588 |
| C14 | -4.1071567664 | 0.8883718615  | 1.7315410780  |
| C15 | -4.4842797939 | 1.3208469259  | 0.4739431928  |
| C16 | -2.7888980317 | 0.5385859423  | 1.9769770096  |
| C17 | -2.2252636861 | 1.0492280099  | -0.2918724447 |
| H51 | -5.5030379021 | 1.5890390546  | 0.2794734473  |
| H52 | -2.5048169564 | 0.2020161883  | 2.9554687691  |
| H55 | -3.8242474859 | 1.7272717684  | -1.5181301127 |
| H56 | -4.8323517595 | 0.8194668824  | 2.5190044769  |
| H59 | -1.5019823261 | 1.0952077314  | -1.0838825327 |
| H60 | 1.6629127227  | 0.9470384239  | 3.0571680126  |
| H61 | 0.3954939955  | 2.1371955723  | 3.3273443000  |
| H62 | 1.9005568797  | 2.6095472398  | 2.5438498268  |

nuclear repulsion energy..... 1442.875343304 hartrees

-----  
 / end of geometry optimization iteration 25 /  
 -----

end of program geopt

start of program onee  
 smallest eigenvalue of S: 1.214E-03  
 number of canonical orbitals..... 210  
 end of program onee

start of program probe  
 end of program probe

start of program grid

number of gridpoints:

| atom     | H25 | C1  | C2  | C3  | C4  | C5  | C6  | C7  |
|----------|-----|-----|-----|-----|-----|-----|-----|-----|
| grid # 1 | 73  | 89  | 87  | 90  | 87  | 87  | 85  | 85  |
| grid # 2 | 106 | 100 | 97  | 98  | 98  | 99  | 91  | 92  |
| grid # 3 | 224 | 183 | 184 | 194 | 182 | 182 | 188 | 182 |
| grid # 4 | 224 | 379 | 380 | 404 | 379 | 379 | 374 | 377 |

number of gridpoints:

| atom     | H27 | H28 | H30 | C8  | H32 | C10 | N2  | C9  |
|----------|-----|-----|-----|-----|-----|-----|-----|-----|
| grid # 1 | 73  | 73  | 73  | 86  | 73  | 82  | 99  | 75  |
| grid # 2 | 106 | 106 | 105 | 91  | 106 | 93  | 109 | 80  |
| grid # 3 | 224 | 224 | 220 | 187 | 223 | 175 | 224 | 164 |
| grid # 4 | 224 | 224 | 219 | 374 | 229 | 349 | 402 | 332 |

number of gridpoints:

| atom     | O1  | H43 | C12 | C11 | C18 | H48 | C13 | C14 |
|----------|-----|-----|-----|-----|-----|-----|-----|-----|
| grid # 1 | 111 | 69  | 90  | 81  | 72  | 69  | 88  | 87  |
| grid # 2 | 127 | 96  | 105 | 93  | 74  | 99  | 100 | 100 |
| grid # 3 | 272 | 210 | 193 | 173 | 147 | 216 | 183 | 183 |
| grid # 4 | 474 | 201 | 399 | 355 | 306 | 209 | 379 | 380 |

number of gridpoints:

|          |     |     |     |     |     |     |     |     |
|----------|-----|-----|-----|-----|-----|-----|-----|-----|
| atom     | C15 | C16 | C17 | H51 | H52 | H55 | H56 | H59 |
| grid # 1 | 89  | 86  | 85  | 73  | 73  | 73  | 73  | 70  |
| grid # 2 | 100 | 100 | 97  | 106 | 103 | 106 | 106 | 102 |
| grid # 3 | 183 | 182 | 181 | 224 | 215 | 224 | 224 | 215 |
| grid # 4 | 379 | 378 | 376 | 224 | 214 | 224 | 224 | 211 |

number of gridpoints:

|          |     |     |     |       |
|----------|-----|-----|-----|-------|
| atom     | H60 | H61 | H62 | total |
| grid # 1 | 71  | 72  | 71  | 2820  |
| grid # 2 | 99  | 99  | 99  | 3488  |
| grid # 3 | 217 | 221 | 220 | 7043  |
| grid # 4 | 218 | 222 | 221 | 10843 |

end of program grid

start of program rwr

```
recomputing RwR matrix 14      grid: 4
recomputing RwR matrix 15      grid: 4
end of program rwr
```

start of program scf

|      | i | u | d | i | g |                  |         | RMS     | maximum |
|------|---|---|---|---|---|------------------|---------|---------|---------|
|      | t | p | i | c | r |                  |         | energy  | density |
|      | e | d | i | u | i |                  |         | change  | DIIS    |
|      | r | t | s | t | d | total energy     |         |         | error   |
| etot | 1 | N | N | 1 | U | -815.14272301303 |         | 7.7E-05 | 8.7E-04 |
| etot | 2 | Y | Y | 4 | M | -815.14279348689 | 7.0E-05 | 1.9E-05 | 2.8E-04 |
| etot | 3 | Y | Y | 4 | M | -815.14279737496 | 3.9E-06 | 6.0E-06 | 1.6E-04 |
| etot | 4 | Y | Y | 4 | M | -815.14279768359 | 3.1E-07 | 2.8E-06 | 5.7E-05 |
| etot | 5 | Y | N | 4 | M | -815.14279837106 | 6.9E-07 | 0.0E+00 | 0.0E+00 |

Energy components, in hartrees:

```
(A) Nuclear repulsion..... 1442.87534330388
(E) Total one-electron terms..... -3971.22858528973
(I) Total two-electron terms..... 1713.21044361479
(L) Electronic energy..... -2258.01814167494 (E+I)
(N) Total energy..... -815.14279837106 (A+L)
```

SCFE: SCF energy: HF -815.14279837106 hartrees iterations: 5

HOMO energy: -0.29703

LUMO energy: 0.11849

Orbital energies:

|           |           |           |           |           |           |
|-----------|-----------|-----------|-----------|-----------|-----------|
| -20.45259 | -15.55264 | -11.32178 | -11.23616 | -11.22281 | -11.21398 |
| -11.20657 | -11.20126 | -11.18771 | -11.18661 | -11.18601 | -11.18556 |
| -11.18418 | -11.18395 | -11.17912 | -11.17711 | -11.17699 | -11.17539 |
| -11.17409 | -11.17237 | -1.42170  | -1.33292  | -1.18081  | -1.16257  |
| -1.11578  | -1.08823  | -1.04094  | -1.02850  | -1.02015  | -1.00058  |
| -0.94734  | -0.90640  | -0.85448  | -0.84392  | -0.83228  | -0.81089  |
| -0.79413  | -0.76180  | -0.72106  | -0.69213  | -0.67872  | -0.66921  |
| -0.65811  | -0.64057  | -0.64032  | -0.62718  | -0.61155  | -0.60567  |
| -0.60413  | -0.60234  | -0.59209  | -0.57807  | -0.55705  | -0.55555  |
| -0.53908  | -0.53184  | -0.51665  | -0.50774  | -0.50004  | -0.49649  |
| -0.49140  | -0.48628  | -0.45921  | -0.42246  | -0.39350  | -0.35040  |
| -0.34258  | -0.31509  | -0.29703  | 0.11849   | 0.13403   | 0.13866   |



0.14192      0.20519      0.22573      0.26433      0.27142      0.27439  
0.29939

end of program scf

start of program derla

end of program derla

start of program rwr

recomputing RwR matrix 14      grid: 4

recomputing RwR matrix 15      grid: 4

end of program rwr

start of program derlb

forces (hartrees/bohr) : total

| atom  | label | x             | y             | z             |
|-------|-------|---------------|---------------|---------------|
| 1     | H25   | -9.714313E-05 | -1.161049E-04 | 2.170986E-05  |
| 2     | C1    | 2.675129E-04  | 2.377839E-05  | -6.904508E-04 |
| 3     | C2    | -1.639912E-03 | 2.578062E-04  | 1.020052E-03  |
| 4     | C3    | 9.890870E-04  | 5.463815E-05  | -2.482887E-04 |
| 5     | C4    | -9.214562E-04 | -5.603544E-04 | 6.284403E-04  |
| 6     | C5    | -6.136311E-04 | 9.668785E-04  | 9.461156E-04  |
| 7     | C6    | 1.094747E-03  | -8.535263E-04 | -9.540568E-04 |
| 8     | C7    | -2.252493E-04 | 6.766657E-04  | -7.108219E-04 |
| 9     | H27   | -1.679923E-04 | -3.709626E-04 | -6.913642E-05 |
| 10    | H28   | 4.647765E-04  | -4.077575E-05 | -3.232213E-04 |
| 11    | H30   | 3.236270E-04  | 6.519178E-05  | 5.141983E-05  |
| 12    | C8    | 6.495391E-05  | -3.593817E-04 | -8.308884E-04 |
| 13    | H32   | -1.263261E-04 | 1.102556E-04  | 3.004845E-05  |
| 14    | C10   | 8.164836E-04  | 1.993241E-04  | 4.602473E-04  |
| 15    | N2    | 1.354779E-03  | 8.481349E-04  | 3.685790E-04  |
| 16    | C9    | 3.401833E-03  | 1.013205E-03  | -6.343755E-04 |
| 17    | O1    | -3.778897E-03 | -2.692785E-03 | 5.867877E-04  |
| 18    | H43   | 4.721782E-04  | -1.401710E-04 | 3.513388E-04  |
| 19    | C12   | -6.575662E-04 | -6.672790E-04 | 6.086884E-04  |
| 20    | C11   | 5.382694E-04  | 4.074872E-04  | -5.385166E-04 |
| 21    | C18   | -9.002836E-04 | 7.500707E-04  | -6.117966E-05 |
| 22    | H48   | -3.457176E-04 | 7.078513E-04  | -6.176515E-04 |
| 23    | C13   | -1.670271E-03 | 2.527050E-04  | 4.705650E-04  |
| 24    | C14   | -9.115917E-04 | 5.133206E-04  | -4.939391E-04 |
| 25    | C15   | 4.113568E-04  | 1.356194E-05  | -5.384865E-04 |
| 26    | C16   | 2.001140E-03  | 9.825150E-05  | -3.029240E-04 |
| 27    | C17   | 1.441721E-03  | -1.994314E-04 | 2.383057E-04  |
| 28    | H51   | -2.335675E-04 | 1.366882E-04  | -1.752295E-04 |
| 29    | H52   | 2.055371E-04  | -2.132495E-04 | -1.630348E-04 |
| 30    | H55   | -1.914988E-04 | 8.238032E-05  | 2.619522E-04  |
| 31    | H56   | 3.930219E-04  | 1.034902E-04  | -5.575606E-04 |
| 32    | H59   | -5.849048E-04 | -2.118714E-04 | 8.644616E-04  |
| 33    | H60   | 6.803009E-04  | -1.042593E-03 | 3.898281E-04  |
| 34    | H61   | -4.529563E-04 | 3.080447E-04  | 7.126579E-04  |
| 35    | H62   | 8.688231E-05  | 8.014975E-05  | -1.534116E-04 |
| total |       | 1.489243E-03  | 2.013943E-04  | -5.197603E-05 |

end of program derlb

start of program geopt 26

geometry optimization step 26

reading input hessian of dimension 105  
in five columns format

reading input hessian of dimension 105  
in five columns format

\*\* restarting optimization from step 25 \*\*

Hessian eigenvalues:

|              |              |              |              |              |
|--------------|--------------|--------------|--------------|--------------|
| -9.50741E-02 | 0.000000E+00 | 0.000000E+00 | 0.000000E+00 | 0.000000E+00 |
| 0.000000E+00 | 0.000000E+00 | 0.000000E+00 | 0.000000E+00 | 0.000000E+00 |
| 0.000000E+00 | 0.000000E+00 | 0.000000E+00 | 0.000000E+00 | 0.000000E+00 |
| 0.000000E+00 | 0.000000E+00 | 0.000000E+00 | 0.000000E+00 | 0.000000E+00 |
| 0.000000E+00 | 0.000000E+00 | 0.000000E+00 | 0.000000E+00 | 0.000000E+00 |
| 0.000000E+00 | 0.000000E+00 | 5.00000E-04  | 5.54763E-03  | 1.83969E-02  |
| 2.19097E-02  | 2.81661E-02  | 3.01001E-02  | 3.08749E-02  | 3.09439E-02  |
| 3.18809E-02  | 3.72485E-02  | 3.96545E-02  | 4.47471E-02  | 4.91724E-02  |
| 5.67172E-02  | 6.73853E-02  | 7.02131E-02  | 7.26847E-02  | 7.48824E-02  |
| 8.11748E-02  | 8.45493E-02  | 9.98910E-02  | 1.00596E-01  | 1.13237E-01  |
| 1.16024E-01  | 1.21635E-01  | 1.26979E-01  | 1.34212E-01  | 1.42662E-01  |
| 1.43925E-01  | 1.44749E-01  | 1.49759E-01  | 1.54288E-01  | 1.59350E-01  |
| 1.64841E-01  | 1.68966E-01  | 1.77131E-01  | 1.78959E-01  | 1.86760E-01  |
| 1.94322E-01  | 1.96588E-01  | 2.07546E-01  | 2.12306E-01  | 2.13982E-01  |
| 2.21543E-01  | 2.28459E-01  | 2.32084E-01  | 2.42437E-01  | 2.46850E-01  |
| 2.51215E-01  | 2.57651E-01  | 2.59895E-01  | 2.71479E-01  | 2.76551E-01  |
| 2.88772E-01  | 2.96009E-01  | 2.99385E-01  | 3.07320E-01  | 3.10338E-01  |
| 3.15981E-01  | 3.19213E-01  | 3.23842E-01  | 3.26952E-01  | 3.32122E-01  |
| 3.35880E-01  | 3.39794E-01  | 3.45924E-01  | 3.50062E-01  | 3.58316E-01  |
| 3.69125E-01  | 3.73231E-01  | 3.76178E-01  | 3.86041E-01  | 3.94643E-01  |
| 4.06418E-01  | 4.14289E-01  | 4.16602E-01  | 4.25483E-01  | 4.39494E-01  |
| 4.45643E-01  | 4.55445E-01  | 4.62867E-01  | 4.70296E-01  | 4.79539E-01  |
| 4.81378E-01  | 4.94331E-01  | 5.15395E-01  | 5.24289E-01  | 5.52069E-01  |
| 5.69824E-01  | 6.31151E-01  | 6.41566E-01  | 6.47624E-01  | 6.52209E-01  |
| 7.20171E-01  | 7.62977E-01  | 9.20144E-01  | 1.03799E+00  | 1.35537E+00  |

WARNING: Hessian has wrong number of negative eigenvalues

Level shifts adjusted to satisfy step-size constraints

Step size: 0.0104182

Cos(theta): 0.9189322

Final level shift: -2.5678303E-01

energy change: 4.7414E-05 \* ( 5.0000E-05 )

gradient maximum: 1.2011E-03 . ( 4.5000E-04 )

gradient rms: 2.9935E-04 \* ( 3.0000E-04 )

step size: 0.01042 trust radius: 0.01000

displacement maximum: 4.0372E-03 . ( 1.8000E-03 )

displacement rms: 9.3183E-04 \* ( 1.2000E-03 )

predicted energy change: -2.9961E-05 geom step: 1.0418E-02 full step:  
1.0418E-02

molecular structure not yet converged...

center of mass moved by:

x: -6.6613E-16 y: -6.5919E-17 z: 2.7756E-16

new geometry:

angstroms  
atom x y z

|     |               |               |               |
|-----|---------------|---------------|---------------|
| H25 | 0.8789559773  | -3.8448035041 | -2.3785695524 |
| C1  | 1.4845402129  | -2.9667843613 | -2.2737414561 |
| C2  | 3.1015611087  | -0.6616819373 | -2.0140721951 |
| C3  | 1.1385505149  | -1.9710570901 | -1.3692330626 |
| C4  | 2.6250348108  | -2.8016479682 | -3.0359195317 |
| C5  | 3.4258817706  | -1.6624518958 | -2.9068638050 |
| C6  | 1.9570529398  | -0.8370211427 | -1.2615576646 |
| C7  | 0.0340358951  | -1.8073664343 | -0.4191473871 |
| H27 | 2.9055717035  | -3.5594210859 | -3.7398161267 |
| H28 | 4.3056581807  | -1.5663217199 | -3.5113271478 |
| H30 | 3.6951361945  | 0.2191299559  | -1.8883931835 |
| C8  | 0.2207035204  | -0.6290878578 | 0.1910075371  |
| H32 | -0.7648811198 | -2.4943088238 | -0.2597946796 |
| C10 | -0.3880097043 | 0.2515891425  | 1.2572161684  |
| N2  | 1.3767999468  | -0.0241733923 | -0.3037758620 |
| C9  | 1.6991720839  | 1.1791983536  | 0.2755077326  |
| O1  | 2.6910257258  | 1.8302847377  | 0.0432380324  |
| H43 | -0.3352748305 | -0.2524390288 | 2.2144591729  |
| C12 | -1.8343456345 | 0.6182214846  | 0.9707889668  |
| C11 | 0.5718600355  | 1.4963833273  | 1.2685270130  |
| C18 | 1.1698971841  | 1.8172255287  | 2.6466242273  |
| H48 | 0.0424146855  | 2.3646608579  | 0.8976562610  |
| C13 | -3.5387503721 | 1.3988758086  | -0.5385262694 |
| C14 | -4.1057152833 | 0.8847904597  | 1.7289478989  |
| C15 | -4.4851360209 | 1.3172896112  | 0.4725456681  |
| C16 | -2.7856278199 | 0.5370707343  | 1.9747303731  |
| C17 | -2.2248466408 | 1.0505491455  | -0.2915303374 |
| H51 | -5.5050165250 | 1.5833340850  | 0.2779998336  |
| H52 | -2.5009659309 | 0.1983567685  | 2.9523074216  |
| H55 | -3.8275877423 | 1.7263264329  | -1.5172342690 |
| H56 | -4.8302724323 | 0.8134237470  | 2.5158180717  |
| H59 | -1.5027396487 | 1.0967697650  | -1.0825101342 |
| H60 | 1.6625117464  | 0.9459471518  | 3.0618646646  |
| H61 | 0.3937646550  | 2.1378749174  | 3.3306733290  |
| H62 | 1.9000754278  | 2.6102599579  | 2.5485962602  |

nuclear repulsion energy..... 1443.022478286 hartrees

/ end of geometry optimization iteration 26 /

end of program geopt

start of program onee  
smallest eigenvalue of S: 1.212E-03  
number of canonical orbitals..... 210  
end of program onee

start of program probe  
end of program probe

start of program grid

number of gridpoints:

| atom     | H25 | C1  | C2  | C3  | C4  | C5  | C6  | C7  |
|----------|-----|-----|-----|-----|-----|-----|-----|-----|
| grid # 1 | 73  | 89  | 87  | 90  | 87  | 87  | 85  | 85  |
| grid # 2 | 106 | 100 | 97  | 98  | 98  | 98  | 91  | 92  |
| grid # 3 | 224 | 183 | 182 | 194 | 182 | 182 | 188 | 183 |
| grid # 4 | 224 | 379 | 381 | 406 | 379 | 379 | 372 | 377 |

number of gridpoints:

|          |     |     |     |     |     |     |     |     |
|----------|-----|-----|-----|-----|-----|-----|-----|-----|
| atom     | H27 | H28 | H30 | C8  | H32 | C10 | N2  | C9  |
| grid # 1 | 73  | 73  | 73  | 86  | 73  | 82  | 99  | 75  |
| grid # 2 | 106 | 106 | 105 | 91  | 106 | 93  | 109 | 80  |
| grid # 3 | 224 | 224 | 220 | 187 | 223 | 175 | 224 | 164 |
| grid # 4 | 224 | 224 | 219 | 374 | 228 | 349 | 402 | 333 |

number of gridpoints:

|          |     |     |     |     |     |     |     |     |
|----------|-----|-----|-----|-----|-----|-----|-----|-----|
| atom     | O1  | H43 | C12 | C11 | C18 | H48 | C13 | C14 |
| grid # 1 | 111 | 69  | 90  | 81  | 71  | 69  | 88  | 87  |
| grid # 2 | 127 | 96  | 105 | 93  | 76  | 99  | 100 | 100 |
| grid # 3 | 272 | 210 | 193 | 173 | 149 | 216 | 183 | 183 |
| grid # 4 | 474 | 201 | 401 | 356 | 306 | 208 | 378 | 379 |

number of gridpoints:

|          |     |     |     |     |     |     |     |     |
|----------|-----|-----|-----|-----|-----|-----|-----|-----|
| atom     | C15 | C16 | C17 | H51 | H52 | H55 | H56 | H59 |
| grid # 1 | 89  | 87  | 85  | 73  | 73  | 73  | 73  | 70  |
| grid # 2 | 100 | 100 | 97  | 106 | 103 | 106 | 106 | 102 |
| grid # 3 | 183 | 182 | 181 | 224 | 214 | 224 | 224 | 215 |
| grid # 4 | 379 | 378 | 376 | 224 | 214 | 224 | 224 | 211 |

number of gridpoints:

|          |     |     |     |       |
|----------|-----|-----|-----|-------|
| atom     | H60 | H61 | H62 | total |
| grid # 1 | 71  | 72  | 71  | 2820  |
| grid # 2 | 99  | 99  | 99  | 3489  |
| grid # 3 | 217 | 221 | 220 | 7043  |
| grid # 4 | 218 | 222 | 221 | 10844 |

end of program grid

start of program rwr

recomputing RwR matrix 15 grid: 4  
end of program rwr

start of program scf

|      | i | u | d | i | g |                  |         | RMS     | maximum |
|------|---|---|---|---|---|------------------|---------|---------|---------|
|      | t | p | i | c | r |                  |         | energy  | DIIS    |
|      | e | d | i | u | i |                  |         | density | error   |
|      | r | t | s | t | d | total energy     | change  | change  |         |
| etot | 1 | N | N | 1 | U | -815.14277440044 |         | 5.9E-05 | 7.3E-04 |
| etot | 2 | Y | Y | 4 | M | -815.14282147841 | 4.7E-05 | 1.4E-05 | 2.0E-04 |
| etot | 3 | Y | Y | 4 | M | -815.14282701493 | 5.5E-06 | 4.8E-06 | 1.5E-04 |
| etot | 4 | Y | N | 4 | M | -815.14282784723 | 8.3E-07 | 0.0E+00 | 0.0E+00 |

Energy components, in hartrees:

|     |                               |                   |       |
|-----|-------------------------------|-------------------|-------|
| (A) | Nuclear repulsion.....        | 1443.02247828638  |       |
| (E) | Total one-electron terms..... | -3971.52479359741 |       |
| (I) | Total two-electron terms..... | 1713.35948746380  |       |
| (L) | Electronic energy.....        | -2258.16530613362 | (E+I) |
| (N) | Total energy.....             | -815.14282784723  | (A+L) |

SCFE: SCF energy: HF -815.14282784723 hartrees iterations: 4

HOMO energy: -0.29691  
LUMO energy: 0.11872

Orbital energies:

|           |           |           |           |           |           |
|-----------|-----------|-----------|-----------|-----------|-----------|
| -20.45248 | -15.55229 | -11.32163 | -11.23590 | -11.22256 | -11.21395 |
| -11.20688 | -11.20095 | -11.18761 | -11.18646 | -11.18587 | -11.18543 |
| -11.18398 | -11.18373 | -11.17902 | -11.17688 | -11.17677 | -11.17554 |
| -11.17458 | -11.17242 | -1.42334  | -1.33307  | -1.18079  | -1.16272  |
| -1.11557  | -1.08822  | -1.04109  | -1.02796  | -1.02035  | -1.00056  |
| -0.94716  | -0.90615  | -0.85442  | -0.84424  | -0.83190  | -0.81100  |
| -0.79398  | -0.76180  | -0.72104  | -0.69207  | -0.67863  | -0.66905  |
| -0.65822  | -0.64064  | -0.64040  | -0.62709  | -0.61183  | -0.60601  |
| -0.60419  | -0.60194  | -0.59210  | -0.57802  | -0.55711  | -0.55565  |
| -0.53896  | -0.53191  | -0.51666  | -0.50770  | -0.50003  | -0.49655  |
| -0.49146  | -0.48614  | -0.45940  | -0.42233  | -0.39359  | -0.34993  |
| -0.34286  | -0.31522  | -0.29691  | 0.11872   | 0.13418   | 0.13892   |
| 0.14218   | 0.20535   | 0.22573   | 0.26447   | 0.27131   | 0.27418   |
| 0.29949   |           |           |           |           |           |

end of program scf

start of program derla

end of program derla

start of program rwr

recomputing RwR matrix 15 grid: 4

end of program rwr

start of program derlb

forces (hartrees/bohr) : total

| atom | label | x             | y             | z             |
|------|-------|---------------|---------------|---------------|
| 1    | H25   | -1.418465E-05 | -6.482077E-05 | -5.232393E-05 |
| 2    | C1    | 1.327387E-04  | 3.328931E-04  | -1.056546E-04 |
| 3    | C2    | -1.401040E-04 | -4.385918E-05 | -6.262136E-06 |
| 4    | C3    | 7.510581E-05  | 9.402452E-06  | 1.557679E-04  |
| 5    | C4    | -1.590224E-06 | -1.831958E-04 | 6.936016E-05  |
| 6    | C5    | 6.660999E-06  | -2.693865E-06 | -1.393898E-04 |
| 7    | C6    | -9.389368E-05 | -1.244106E-04 | 1.897775E-04  |
| 8    | C7    | -2.842837E-04 | 6.403235E-04  | -8.413399E-04 |
| 9    | H27   | 1.594529E-05  | -1.141470E-04 | -3.921277E-06 |
| 10   | H28   | -1.375583E-04 | -5.477686E-05 | 1.010127E-04  |
| 11   | H30   | 9.594328E-05  | 8.504632E-05  | 2.642337E-06  |
| 12   | C8    | -2.302025E-04 | 1.812065E-04  | -3.203690E-04 |
| 13   | H32   | 6.592407E-05  | -5.690603E-06 | 1.620745E-05  |
| 14   | C10   | 5.428340E-04  | 3.018413E-05  | -2.278840E-04 |
| 15   | N2    | 4.442705E-04  | -4.401613E-04 | 5.080769E-04  |
| 16   | C9    | 1.755508E-04  | -2.307928E-04 | 4.006757E-04  |
| 17   | O1    | 1.444185E-04  | -9.723184E-05 | 1.117759E-04  |
| 18   | H43   | 4.632526E-04  | 2.062685E-04  | -1.821814E-05 |
| 19   | C12   | -2.710081E-04 | -8.828715E-04 | 6.430544E-04  |
| 20   | C11   | -2.944421E-04 | 4.693575E-04  | -2.986546E-04 |
| 21   | C18   | -4.324201E-04 | 3.224197E-04  | -1.784564E-04 |
| 22   | H48   | 2.720362E-04  | -2.633121E-04 | -4.377055E-04 |
| 23   | C13   | 1.560807E-04  | 2.792447E-05  | 3.589385E-05  |
| 24   | C14   | 4.737722E-05  | 7.692290E-05  | 2.491746E-04  |
| 25   | C15   | -1.016630E-04 | 5.268981E-05  | -9.203413E-06 |
| 26   | C16   | -6.581472E-05 | 3.079911E-04  | 1.877716E-04  |
| 27   | C17   | 9.447180E-05  | 2.508150E-05  | -4.247505E-06 |

|       |       |               |               |               |
|-------|-------|---------------|---------------|---------------|
| 28    | H51   | 1.551168E-04  | 3.173427E-05  | 2.501224E-05  |
| 29    | H52   | -9.209584E-06 | -6.297352E-05 | -7.042321E-05 |
| 30    | H55   | 6.878818E-05  | 1.042174E-04  | -9.382444E-05 |
| 31    | H56   | 1.054882E-04  | 4.624873E-05  | -5.906166E-05 |
| 32    | H59   | 9.067291E-05  | -5.345254E-06 | -1.285165E-04 |
| 33    | H60   | 2.558064E-04  | -2.052772E-04 | -6.340874E-05 |
| 34    | H61   | -1.039576E-04 | 2.810835E-05  | 1.495370E-04  |
| 35    | H62   | 1.376270E-04  | 3.405769E-06  | 2.476452E-05  |
| ----- |       |               |               |               |
|       | total | 1.365777E-03  | 1.998658E-04  | -1.883601E-04 |

end of program der1b

start of program geopt 27

geometry optimization step 27

reading input hessian of dimension 105  
in five columns format

reading input hessian of dimension 105  
in five columns format

Hessian eigenvalues:

|              |             |             |             |             |
|--------------|-------------|-------------|-------------|-------------|
| -1.39181E-01 | 0.00000E+00 | 0.00000E+00 | 0.00000E+00 | 0.00000E+00 |
| 0.00000E+00  | 0.00000E+00 | 0.00000E+00 | 0.00000E+00 | 0.00000E+00 |
| 0.00000E+00  | 0.00000E+00 | 0.00000E+00 | 0.00000E+00 | 0.00000E+00 |
| 0.00000E+00  | 0.00000E+00 | 0.00000E+00 | 0.00000E+00 | 0.00000E+00 |
| 0.00000E+00  | 0.00000E+00 | 0.00000E+00 | 0.00000E+00 | 0.00000E+00 |
| 0.00000E+00  | 0.00000E+00 | 5.00000E-04 | 2.99096E-03 | 2.18068E-02 |
| 2.39126E-02  | 2.81591E-02 | 2.96236E-02 | 3.04541E-02 | 3.10836E-02 |
| 3.21481E-02  | 3.61879E-02 | 3.73578E-02 | 4.46589E-02 | 5.13883E-02 |
| 5.72032E-02  | 6.26431E-02 | 6.95108E-02 | 7.39887E-02 | 7.60631E-02 |
| 7.95039E-02  | 8.45084E-02 | 9.30603E-02 | 9.81680E-02 | 1.10657E-01 |
| 1.13777E-01  | 1.18526E-01 | 1.29260E-01 | 1.33796E-01 | 1.41860E-01 |
| 1.42993E-01  | 1.46245E-01 | 1.51672E-01 | 1.53968E-01 | 1.61594E-01 |
| 1.65382E-01  | 1.70163E-01 | 1.73067E-01 | 1.79252E-01 | 1.91223E-01 |
| 1.92164E-01  | 1.97509E-01 | 2.05485E-01 | 2.10793E-01 | 2.18453E-01 |
| 2.19181E-01  | 2.25576E-01 | 2.31226E-01 | 2.37216E-01 | 2.42520E-01 |
| 2.48981E-01  | 2.54285E-01 | 2.57649E-01 | 2.82986E-01 | 2.86286E-01 |
| 2.89048E-01  | 2.95252E-01 | 3.04138E-01 | 3.07846E-01 | 3.14220E-01 |
| 3.18553E-01  | 3.21649E-01 | 3.24063E-01 | 3.26203E-01 | 3.29975E-01 |
| 3.36616E-01  | 3.38065E-01 | 3.40959E-01 | 3.53495E-01 | 3.56261E-01 |
| 3.76683E-01  | 3.77953E-01 | 3.87916E-01 | 3.93922E-01 | 3.98506E-01 |
| 4.04501E-01  | 4.12562E-01 | 4.26384E-01 | 4.33447E-01 | 4.37663E-01 |
| 4.54439E-01  | 4.67650E-01 | 4.74725E-01 | 4.79839E-01 | 4.81886E-01 |
| 4.88727E-01  | 4.99888E-01 | 5.11870E-01 | 5.29038E-01 | 5.63373E-01 |
| 5.75005E-01  | 6.14696E-01 | 6.41734E-01 | 6.50422E-01 | 7.10122E-01 |
| 7.37612E-01  | 8.37001E-01 | 1.03856E+00 | 1.06750E+00 | 1.36852E+00 |

WARNING: Hessian has wrong number of negative eigenvalues

WARNING: positive P-RFO shift not converged: using initial-guess shift

Level shifts adjusted to satisfy step-size constraints

Step size: 0.0143152

Cos(theta): 0.9172034

Final level shift: -1.9447812E-01

|                   |            |   |   |            |   |
|-------------------|------------|---|---|------------|---|
| energy change:    | 1.7937E-05 | * | ( | 5.0000E-05 | ) |
| gradient maximum: | 1.0830E-03 | . | ( | 4.5000E-04 | ) |
| gradient rms:     | 2.5022E-04 | * | ( | 3.0000E-04 | ) |

step size: 0.01432 trust radius: 0.01414  
 displacement maximum: 5.6914E-03 . ( 1.8000E-03 )  
 displacement rms: 1.2804E-03 . ( 1.2000E-03 )  
 predicted energy change: -3.8297E-05 geom step: 1.4315E-02 full step:  
 1.4315E-02  
 molecular structure not yet converged...

center of mass moved by:  
 x: 1.2197E-03 y: -1.2543E-03 z: 6.9472E-04

new geometry:

|      | angstroms     |               |               |
|------|---------------|---------------|---------------|
| atom | x             | y             | z             |
| H25  | 0.8762564274  | -3.8415745856 | -2.3859327936 |
| C1   | 1.4838846979  | -2.9650153357 | -2.2780619256 |
| C2   | 3.1050351571  | -0.6643072970 | -2.0114989424 |
| C3   | 1.1387135994  | -1.9702469354 | -1.3720246931 |
| C4   | 2.6252574527  | -2.8014802971 | -3.0383973185 |
| C5   | 3.4280825851  | -1.6642224812 | -2.9059637101 |
| C6   | 1.9593216140  | -0.8381565407 | -1.2605667864 |
| C7   | 0.0332171439  | -1.8054800894 | -0.4238157335 |
| H27  | 2.9051726401  | -3.5586555444 | -3.7432782072 |
| H28  | 4.3078745690  | -1.5681621116 | -3.5089258714 |
| H30  | 3.7002932907  | 0.2150917095  | -1.8834996258 |
| C8   | 0.2202436032  | -0.6283196631 | 0.1884203827  |
| H32  | -0.7672263185 | -2.4911312967 | -0.2673408582 |
| C10  | -0.3887314537 | 0.2515691239  | 1.2546920167  |
| N2   | 1.3782775854  | -0.0255289961 | -0.3032191851 |
| C9   | 1.7009888511  | 1.1771873167  | 0.2770513891  |
| O1   | 2.69444444086 | 1.8259675903  | 0.0476440436  |
| H43  | -0.3344995209 | -0.2522628667 | 2.2116207087  |
| C12  | -1.8355029822 | 0.6176775311  | 0.9708220197  |
| C11  | 0.5709290907  | 1.4967144391  | 1.2656390692  |
| C18  | 1.1634893633  | 1.8224484538  | 2.6446358403  |
| H48  | 0.0424842602  | 2.3630957358  | 0.8899026329  |
| C13  | -3.5407725084 | 1.3990495656  | -0.5359094328 |
| C14  | -4.1046964127 | 0.8860847939  | 1.7327679746  |
| C15  | -4.4854528573 | 1.3184037640  | 0.4766826871  |
| C16  | -2.7851138035 | 0.5376662373  | 1.9764238462  |
| C17  | -2.2273714564 | 1.0498810658  | -0.2910784896 |
| H51  | -5.5051078217 | 1.5850594632  | 0.2838256040  |
| H52  | -2.4988968958 | 0.1992718666  | 2.9532963178  |
| H55  | -3.8306354075 | 1.7265491466  | -1.5141837773 |
| H56  | -4.8281395566 | 0.8153325982  | 2.5203989867  |
| H59  | -1.5063848853 | 1.0965293136  | -1.0834900422 |
| H60  | 1.6549235449  | 0.9523982607  | 3.0647492041  |
| H61  | 0.3839738535  | 2.1453922798  | 3.3245628006  |
| H62  | 1.8941132809  | 2.6154013711  | 2.5476806675  |

nuclear repulsion energy..... 1443.043531714 hartrees

/ end of geometry optimization iteration 27 /

end of program geopt

start of program onee  
 smallest eigenvalue of S: 1.210E-03  
 number of canonical orbitals..... 210  
 end of program onee

start of program probe  
end of program probe

start of program grid

number of gridpoints:

| atom     | H25 | C1  | C2  | C3  | C4  | C5  | C6  | C7  |
|----------|-----|-----|-----|-----|-----|-----|-----|-----|
| grid # 1 | 73  | 89  | 87  | 90  | 87  | 87  | 85  | 85  |
| grid # 2 | 106 | 100 | 97  | 98  | 98  | 99  | 91  | 92  |
| grid # 3 | 224 | 183 | 182 | 194 | 182 | 182 | 187 | 183 |
| grid # 4 | 224 | 379 | 381 | 404 | 379 | 379 | 372 | 377 |

number of gridpoints:

| atom     | H27 | H28 | H30 | C8  | H32 | C10 | N2  | C9  |
|----------|-----|-----|-----|-----|-----|-----|-----|-----|
| grid # 1 | 73  | 73  | 73  | 86  | 73  | 82  | 99  | 75  |
| grid # 2 | 106 | 106 | 105 | 91  | 106 | 93  | 109 | 80  |
| grid # 3 | 224 | 224 | 220 | 187 | 223 | 175 | 224 | 164 |
| grid # 4 | 224 | 224 | 219 | 374 | 228 | 349 | 402 | 332 |

number of gridpoints:

| atom     | O1  | H43 | C12 | C11 | C18 | H48 | C13 | C14 |
|----------|-----|-----|-----|-----|-----|-----|-----|-----|
| grid # 1 | 111 | 69  | 90  | 81  | 71  | 69  | 87  | 87  |
| grid # 2 | 123 | 96  | 105 | 93  | 77  | 99  | 100 | 100 |
| grid # 3 | 272 | 210 | 193 | 172 | 149 | 216 | 183 | 183 |
| grid # 4 | 474 | 201 | 401 | 356 | 305 | 208 | 378 | 379 |

number of gridpoints:

| atom     | C15 | C16 | C17 | H51 | H52 | H55 | H56 | H59 |
|----------|-----|-----|-----|-----|-----|-----|-----|-----|
| grid # 1 | 89  | 86  | 85  | 73  | 73  | 73  | 73  | 70  |
| grid # 2 | 100 | 100 | 97  | 106 | 103 | 106 | 106 | 102 |
| grid # 3 | 183 | 182 | 181 | 224 | 214 | 224 | 224 | 215 |
| grid # 4 | 379 | 378 | 376 | 224 | 214 | 224 | 224 | 211 |

number of gridpoints:

| atom     | H60 | H61 | H62 | total |
|----------|-----|-----|-----|-------|
| grid # 1 | 71  | 72  | 71  | 2818  |
| grid # 2 | 99  | 99  | 99  | 3487  |
| grid # 3 | 217 | 221 | 220 | 7041  |
| grid # 4 | 218 | 222 | 221 | 10840 |

end of program grid

start of program rwr

recomputing RwR matrix 14      grid: 4  
recomputing RwR matrix 15      grid: 4  
end of program rwr

start of program scf

|      | i | u | d | i | g |                  |         | RMS     | maximum |
|------|---|---|---|---|---|------------------|---------|---------|---------|
|      | t | p | i | c | r |                  |         | density | DIIS    |
|      | e | d | i | u | i | energy           | energy  | change  | error   |
|      | r | t | s | t | d | total energy     | change  |         |         |
| etot | 1 | N | N | 1 | U | -815.14280969734 |         | 5.0E-05 | 1.1E-03 |
| etot | 2 | Y | Y | 4 | M | -815.14286250291 | 5.3E-05 | 1.5E-05 | 4.4E-04 |
| etot | 3 | Y | Y | 4 | M | -815.14286718030 | 4.7E-06 | 4.8E-06 | 1.4E-04 |
| etot | 4 | Y | N | 4 | M | -815.14286771519 | 5.3E-07 | 0.0E+00 | 0.0E+00 |



Energy components, in hartrees:

```
(A) Nuclear repulsion..... 1443.04353171359
(E) Total one-electron terms..... -3971.56379385594
(I) Total two-electron terms..... 1713.37739442716
(L) Electronic energy..... -2258.18639942878 (E+I)
(N) Total energy..... -815.14286771519 (A+L)
```

SCFE: SCF energy: HF -815.14286771519 hartrees iterations: 4

HOMO energy: -0.29681

LUMO energy: 0.11875

Orbital energies:

```
-20.45283 -15.55212 -11.32141 -11.23575 -11.22258 -11.21388
-11.20670 -11.20098 -11.18758 -11.18633 -11.18575 -11.18532
-11.18395 -11.18369 -11.17899 -11.17683 -11.17675 -11.17532
-11.17467 -11.17226 -1.42374 -1.33323 -1.18093 -1.16280
-1.11563 -1.08819 -1.04107 -1.02822 -1.02044 -1.00052
-0.94717 -0.90620 -0.85437 -0.84424 -0.83208 -0.81102
-0.79410 -0.76178 -0.72115 -0.69224 -0.67872 -0.66913
-0.65823 -0.64065 -0.64052 -0.62712 -0.61182 -0.60608
-0.60422 -0.60214 -0.59208 -0.57805 -0.55713 -0.55568
-0.53895 -0.53200 -0.51674 -0.50774 -0.50008 -0.49656
-0.49142 -0.48617 -0.45949 -0.42241 -0.39355 -0.35012
-0.34280 -0.31528 -0.29681 0.11875 0.13418 0.13900
0.14221 0.20544 0.22584 0.26450 0.27139 0.27432
0.29945
```

end of program scf

start of program derla

end of program derla

start of program rwr

recomputing Rwr matrix 14 grid: 4

recomputing Rwr matrix 15 grid: 4

end of program rwr

start of program derlb

forces (hartrees/bohr) : total

| atom | label | x             | y             | z             |
|------|-------|---------------|---------------|---------------|
| 1    | H25   | 5.536507E-05  | 1.009587E-04  | 4.972662E-05  |
| 2    | C1    | -3.989019E-04 | 1.408619E-05  | 8.000543E-05  |
| 3    | C2    | -8.102358E-05 | -1.450321E-05 | -3.267739E-05 |
| 4    | C3    | 1.959152E-04  | 5.665780E-05  | 2.097242E-04  |
| 5    | C4    | 2.199285E-04  | -6.881441E-05 | -5.965728E-06 |
| 6    | C5    | -2.928512E-04 | 2.773931E-04  | 2.625893E-04  |
| 7    | C6    | -1.928033E-04 | -2.375571E-04 | -3.312746E-05 |
| 8    | C7    | -7.587958E-04 | 4.044530E-04  | -7.515646E-04 |
| 9    | H27   | -7.134534E-06 | -6.586448E-05 | 5.135270E-06  |
| 10   | H28   | 4.172658E-04  | -5.370583E-05 | -2.632260E-04 |
| 11   | H30   | 1.103792E-04  | 2.589041E-05  | -6.516174E-05 |
| 12   | C8    | -2.038889E-04 | -3.229695E-04 | -6.789807E-04 |

|       |       |               |               |               |
|-------|-------|---------------|---------------|---------------|
| 13    | H32   | -1.715685E-05 | -5.543916E-05 | 6.339978E-05  |
| 14    | C10   | 6.392731E-04  | 2.578378E-04  | 1.829044E-05  |
| 15    | N2    | 7.850015E-04  | -3.018746E-04 | 4.299509E-04  |
| 16    | C9    | -1.186536E-04 | -5.850359E-04 | 5.707698E-04  |
| 17    | O1    | 7.240532E-04  | 4.453162E-04  | -7.495729E-05 |
| 18    | H43   | 5.043722E-04  | 4.955469E-05  | 2.184360E-04  |
| 19    | C12   | -1.543278E-04 | -7.383911E-04 | 3.943102E-04  |
| 20    | C11   | -2.828955E-04 | 4.492621E-04  | -1.583964E-04 |
| 21    | C18   | -5.125772E-04 | 2.802292E-04  | 1.993410E-04  |
| 22    | H48   | 1.274753E-04  | -3.383880E-05 | -5.078225E-04 |
| 23    | C13   | -3.093525E-04 | 1.344736E-04  | -5.315293E-05 |
| 24    | C14   | -3.212942E-04 | 1.830832E-04  | -5.325624E-05 |
| 25    | C15   | -1.527675E-04 | 3.328053E-05  | 5.454941E-05  |
| 26    | C16   | 5.292555E-04  | 1.733152E-04  | 1.149952E-04  |
| 27    | C17   | 6.903139E-04  | 3.794942E-05  | -6.614406E-05 |
| 28    | H51   | -1.114371E-04 | 8.602323E-05  | -4.892655E-05 |
| 29    | H52   | 6.232425E-05  | -1.578207E-04 | 1.605981E-04  |
| 30    | H55   | -2.171484E-05 | 1.352268E-04  | -1.419888E-04 |
| 31    | H56   | -1.759742E-05 | 4.010799E-05  | 6.055829E-05  |
| 32    | H59   | -1.453458E-05 | -1.025774E-04 | 1.123527E-04  |
| 33    | H60   | 9.483755E-05  | -2.301336E-06 | -1.147813E-04 |
| 34    | H61   | 1.902297E-04  | -1.218181E-04 | -3.025538E-05 |
| 35    | H62   | 2.885088E-05  | -6.721982E-05 | -6.047267E-05 |
| ----- |       |               |               |               |
|       | total | 1.405133E-03  | 2.553679E-04  | -1.361251E-04 |

end of program derlb

start of program geopt 28

geometry optimization step 28

reading input hessian of dimension 105

in five columns format

reading input hessian of dimension 105

in five columns format

Hessian eigenvalues:

|              |             |             |             |             |
|--------------|-------------|-------------|-------------|-------------|
| -1.11929E-01 | 0.00000E+00 | 0.00000E+00 | 0.00000E+00 | 0.00000E+00 |
| 0.00000E+00  | 0.00000E+00 | 0.00000E+00 | 0.00000E+00 | 0.00000E+00 |
| 0.00000E+00  | 0.00000E+00 | 0.00000E+00 | 0.00000E+00 | 0.00000E+00 |
| 0.00000E+00  | 0.00000E+00 | 0.00000E+00 | 0.00000E+00 | 0.00000E+00 |
| 0.00000E+00  | 0.00000E+00 | 0.00000E+00 | 0.00000E+00 | 0.00000E+00 |
| 0.00000E+00  | 0.00000E+00 | 5.00000E-04 | 2.75903E-03 | 2.09042E-02 |
| 2.28789E-02  | 2.82011E-02 | 2.97817E-02 | 3.08737E-02 | 3.11769E-02 |
| 3.17706E-02  | 3.55129E-02 | 3.74101E-02 | 4.44379E-02 | 5.09892E-02 |
| 5.67234E-02  | 6.35169E-02 | 7.01962E-02 | 7.20938E-02 | 7.48144E-02 |
| 7.67875E-02  | 8.62471E-02 | 9.51092E-02 | 9.78841E-02 | 1.09466E-01 |
| 1.13788E-01  | 1.16667E-01 | 1.23785E-01 | 1.35217E-01 | 1.41516E-01 |
| 1.44886E-01  | 1.48730E-01 | 1.52072E-01 | 1.56368E-01 | 1.62262E-01 |
| 1.69466E-01  | 1.70883E-01 | 1.74381E-01 | 1.79946E-01 | 1.91980E-01 |
| 1.98687E-01  | 2.02083E-01 | 2.05670E-01 | 2.11286E-01 | 2.17633E-01 |
| 2.21922E-01  | 2.29240E-01 | 2.31979E-01 | 2.39414E-01 | 2.45351E-01 |
| 2.49951E-01  | 2.53072E-01 | 2.60662E-01 | 2.76096E-01 | 2.84800E-01 |
| 2.88286E-01  | 2.99944E-01 | 3.08328E-01 | 3.12046E-01 | 3.14401E-01 |
| 3.16406E-01  | 3.19509E-01 | 3.26727E-01 | 3.27263E-01 | 3.32579E-01 |
| 3.36729E-01  | 3.43072E-01 | 3.47957E-01 | 3.54450E-01 | 3.59656E-01 |
| 3.74618E-01  | 3.79420E-01 | 3.82385E-01 | 3.84015E-01 | 3.94369E-01 |
| 4.07458E-01  | 4.17401E-01 | 4.21048E-01 | 4.33157E-01 | 4.41591E-01 |
| 4.54382E-01  | 4.61946E-01 | 4.63908E-01 | 4.78974E-01 | 4.83786E-01 |
| 4.88898E-01  | 5.02225E-01 | 5.11453E-01 | 5.25525E-01 | 5.59083E-01 |
| 5.80431E-01  | 6.08632E-01 | 6.42404E-01 | 6.56377E-01 | 6.86415E-01 |

7.49177E-01 7.81609E-01 9.47080E-01 1.04454E+00 1.32233E+00

WARNING: Hessian has wrong number of negative eigenvalues

Level shifts adjusted to satisfy step-size constraints

Step size: 0.0201984

Cos(theta): 0.8445332

Final level shift: -1.8279453E-01

energy change: -3.9868E-05 \* ( 5.0000E-05 )

gradient maximum: 9.6437E-04 . ( 4.5000E-04 )

gradient rms: 2.8312E-04 \* ( 3.0000E-04 )

step size: 0.02020 trust radius: 0.02000

displacement maximum: 5.9365E-03 . ( 1.8000E-03 )

displacement rms: 1.8066E-03 . ( 1.2000E-03 )

predicted energy change: -6.4293E-05 geom step: 2.0198E-02 full step:  
2.0198E-02

molecular structure not yet converged...

center of mass moved by:

x: 1.3454E-04 y: 1.1136E-03 z: -8.2184E-04

new geometry:

|      | angstroms     |               |               |
|------|---------------|---------------|---------------|
| atom | x             | y             | z             |
| H25  | 0.8738413172  | -3.8395126865 | -2.3880074182 |
| C1   | 1.4823771565  | -2.9641670753 | -2.2796172648 |
| C2   | 3.1088378346  | -0.6660601406 | -2.0104479052 |
| C3   | 1.1356667011  | -1.9675515396 | -1.3760684112 |
| C4   | 2.6285798581  | -2.8048139871 | -3.0358437892 |
| C5   | 3.4341194971  | -1.6685466187 | -2.9024254258 |
| C6   | 1.9591508693  | -0.8372601631 | -1.2633235157 |
| C7   | 0.0273899614  | -1.8012125337 | -0.4306555570 |
| H27  | 2.9085673743  | -3.5651042014 | -3.7376095766 |
| H28  | 4.3188929829  | -1.5778038716 | -3.5025266163 |
| H30  | 3.7070515623  | 0.2123122648  | -1.8815227743 |
| C8   | 0.2185345792  | -0.6259554664 | 0.1835737015  |
| H32  | -0.7746513383 | -2.4853957181 | -0.2739752425 |
| C10  | -0.3871491064 | 0.2533881144  | 1.2529689920  |
| N2   | 1.3798834071  | -0.0244556996 | -0.3051342287 |
| C9   | 1.7042648905  | 1.1768656725  | 0.2772162695  |
| O1   | 2.6986868413  | 1.8264491196  | 0.0478237842  |
| H43  | -0.3273172182 | -0.2511607111 | 2.2101487875  |
| C12  | -1.8353728682 | 0.6185797333  | 0.9719679566  |
| C11  | 0.5721540253  | 1.4982942043  | 1.2639027723  |
| C18  | 1.1621426501  | 1.8220061121  | 2.6445611869  |
| H48  | 0.0440741557  | 2.3652947313  | 0.8867454990  |
| C13  | -3.5459865584 | 1.3986414206  | -0.5320189121 |
| C14  | -4.1065410637 | 0.8836802522  | 1.7361256168  |
| C15  | -4.4902421326 | 1.3164571579  | 0.4811583359  |
| C16  | -2.7843196607 | 0.5363666339  | 1.9782751816  |
| C17  | -2.2295392076 | 1.0507074659  | -0.2889076812 |
| H51  | -5.5110104152 | 1.5821772495  | 0.2887421749  |
| H52  | -2.4977012363 | 0.1964471475  | 2.9542401645  |
| H55  | -3.8378129506 | 1.7267997116  | -1.5100299323 |
| H56  | -4.8286153981 | 0.8119901212  | 2.5238830547  |
| H59  | -1.5098119344 | 1.0959965074  | -1.0812569317 |
| H60  | 1.6540373854  | 0.9507197956  | 3.0633027555  |
| H61  | 0.3817231106  | 2.1423687530  | 3.3252673160  |
| H62  | 1.8920483112  | 2.6150609687  | 2.5483179491  |

```

nuclear repulsion energy..... 1442.523823494 hartrees
-----
/  end of geometry optimization iteration  28  /
-----

end of program geopt

start of program onee
smallest eigenvalue of S:    1.216E-03
number of canonical orbitals.....      210
end of program onee

start of program probe
end of program probe

start of program grid

number of gridpoints:
  atom      H25      C1      C2      C3      C4      C5      C6      C7
grid # 1      73      89      87      90      87      87      85      85
grid # 2     106     100     97      98      98      98      91      92
grid # 3     224     183    182     194     182     182     188     183
grid # 4     224     379    383     405     379     379     374     377

number of gridpoints:
  atom      H27      H28      H30      C8      H32      C10      N2      C9
grid # 1      73      73      73      86      73      82      99      75
grid # 2     106     106     105      91     106      93     109      80
grid # 3     224     224     220     187     223     175     224     164
grid # 4     224     224     219     374     228     349     401     333

number of gridpoints:
  atom      O1      H43      C12      C11      C18      H48      C13      C14
grid # 1     111      69      90      81      71      69      87      87
grid # 2     127      96     105      93      74      99     100     100
grid # 3     272     208     193     173     139     216     183     183
grid # 4     475     201     401     355     307     208     379     379

number of gridpoints:
  atom      C15      C16      C17      H51      H52      H55      H56      H59
grid # 1      89      87      85      73      73      73      73      70
grid # 2     100     100      98     106     103     106     106     102
grid # 3     183     182     181     224     215     224     224     215
grid # 4     379     377     377     224     214     224     224     211

number of gridpoints:
  atom      H60      H61      H62  total
grid # 1      71      72      71   2819
grid # 2      99      99      99   3488
grid # 3     217     221     220   7032
grid # 4     218     222     221  10848

end of program grid

start of program rwr
recomputing Rwr matrix  15      grid:  4
end of program rwr

```

start of program scf

|      | i | u | d | i | g |                  | energy   | RMS     | maximum |
|------|---|---|---|---|---|------------------|----------|---------|---------|
|      | t | p | i | c | r |                  | change   | density | DIIS    |
|      | e | d | i | u | i |                  |          | change  | error   |
|      | r | t | s | t | d | total energy     |          |         |         |
| etot | 1 | N | N | 1 | U | -815.14274984067 |          | 6.4E-05 | 1.0E-03 |
| etot | 2 | Y | Y | 4 | M | -815.14283441889 | 8.5E-05  | 1.8E-05 | 4.2E-04 |
| etot | 3 | Y | Y | 4 | M | -815.14284245552 | 8.0E-06  | 6.5E-06 | 1.4E-04 |
| etot | 4 | Y | Y | 4 | M | -815.14284407133 | 1.6E-06  | 2.7E-06 | 5.3E-05 |
| etot | 5 | Y | N | 4 | M | -815.14284261108 | -1.5E-06 | 0.0E+00 | 0.0E+00 |

Energy components, in hartrees:

|     |                               |                   |       |
|-----|-------------------------------|-------------------|-------|
| (A) | Nuclear repulsion.....        | 1442.52382349407  |       |
| (E) | Total one-electron terms..... | -3970.52966655893 |       |
| (I) | Total two-electron terms..... | 1712.86300045379  |       |
| (L) | Electronic energy.....        | -2257.66666610514 | (E+I) |
| (N) | Total energy.....             | -815.14284261108  | (A+L) |

SCFE: SCF energy: HF      -815.14284261108 hartrees      iterations:      5

HOMO energy:      -0.29702

LUMO energy:      0.11861

Orbital energies:

|           |           |           |           |           |           |
|-----------|-----------|-----------|-----------|-----------|-----------|
| -20.45262 | -15.55241 | -11.32170 | -11.23604 | -11.22288 | -11.21406 |
| -11.20695 | -11.20109 | -11.18787 | -11.18659 | -11.18596 | -11.18568 |
| -11.18411 | -11.18386 | -11.17915 | -11.17719 | -11.17712 | -11.17590 |
| -11.17473 | -11.17259 | -1.42286  | -1.33291  | -1.18056  | -1.16242  |
| -1.11546  | -1.08827  | -1.04107  | -1.02754  | -1.02014  | -1.00051  |
| -0.94703  | -0.90614  | -0.85426  | -0.84437  | -0.83176  | -0.81089  |
| -0.79379  | -0.76161  | -0.72104  | -0.69202  | -0.67856  | -0.66884  |
| -0.65830  | -0.64078  | -0.64022  | -0.62699  | -0.61171  | -0.60583  |
| -0.60415  | -0.60175  | -0.59213  | -0.57793  | -0.55705  | -0.55554  |
| -0.53875  | -0.53181  | -0.51661  | -0.50750  | -0.50016  | -0.49652  |
| -0.49148  | -0.48605  | -0.45922  | -0.42234  | -0.39367  | -0.34957  |
| -0.34307  | -0.31510  | -0.29702  | 0.11861   | 0.13408   | 0.13863   |
| 0.14196   | 0.20513   | 0.22566   | 0.26447   | 0.27116   | 0.27407   |
| 0.29947   |           |           |           |           |           |

end of program scf

start of program derla

end of program derla

start of program rwr

recomputing RwR matrix 15      grid: 4

end of program rwr

start of program derlb

forces (hartrees/bohr) : total

| atom | label | x | y | z |
|------|-------|---|---|---|
|------|-------|---|---|---|

|       |     |               |               |               |
|-------|-----|---------------|---------------|---------------|
| 1     | H25 | -1.184316E-04 | -1.592729E-04 | -6.207227E-05 |
| 2     | C1  | 6.603408E-04  | 5.109037E-04  | -3.586909E-04 |
| 3     | C2  | 1.836873E-05  | -3.486972E-04 | -2.528074E-04 |
| 4     | C3  | 4.651232E-04  | -2.189672E-04 | -4.516129E-04 |
| 5     | C4  | -4.783517E-04 | 2.720486E-04  | 5.741075E-04  |
| 6     | C5  | -2.144340E-05 | -1.653835E-04 | -1.246811E-04 |
| 7     | C6  | 6.492401E-04  | -2.977891E-04 | -6.408855E-05 |
| 8     | C7  | 2.229574E-04  | 7.431298E-04  | -7.248244E-04 |
| 9     | H27 | 1.011378E-04  | 1.359528E-04  | 6.263466E-05  |
| 10    | H28 | -8.771328E-04 | 9.012589E-05  | 6.432466E-04  |
| 11    | H30 | -4.474036E-04 | -4.891673E-04 | 4.620147E-05  |
| 12    | C8  | 3.466963E-05  | 8.406533E-04  | 1.667482E-04  |
| 13    | H32 | 1.615509E-04  | 1.102869E-04  | -1.501911E-04 |
| 14    | C10 | 2.994149E-04  | -1.605620E-04 | -1.368404E-04 |
| 15    | N2  | -1.420113E-04 | -7.164698E-04 | 5.964335E-04  |
| 16    | C9  | 8.066099E-04  | 8.625824E-04  | -1.938297E-04 |
| 17    | O1  | -9.259055E-04 | -9.600683E-04 | 5.324046E-04  |
| 18    | H43 | 8.753082E-06  | 1.846301E-04  | -3.953546E-04 |
| 19    | C12 | -2.294939E-04 | -9.103137E-04 | 1.036095E-03  |
| 20    | C11 | -3.911700E-04 | 3.265715E-04  | -2.919776E-04 |
| 21    | C18 | -4.823798E-04 | -1.080611E-04 | 1.531590E-04  |
| 22    | H48 | 5.118240E-04  | -4.815420E-04 | -3.313102E-04 |
| 23    | C13 | 1.206448E-03  | -7.693322E-05 | -2.100000E-04 |
| 24    | C14 | 1.422260E-03  | -1.292129E-04 | -5.856680E-05 |
| 25    | C15 | 4.021125E-04  | 4.047898E-05  | -2.578471E-04 |
| 26    | C16 | -1.075714E-03 | 5.742479E-04  | -2.930558E-04 |
| 27    | C17 | -1.715940E-03 | 3.516449E-04  | 5.184368E-05  |
| 28    | H51 | 4.343475E-04  | -6.445100E-05 | 1.438144E-04  |
| 29    | H52 | 1.284785E-04  | -1.217573E-04 | 3.360721E-04  |
| 30    | H55 | 2.266887E-04  | -4.089598E-05 | 1.130808E-04  |
| 31    | H56 | -2.774198E-04 | -1.140167E-04 | 6.206160E-04  |
| 32    | H59 | 2.396625E-04  | 1.839869E-04  | -5.630890E-04 |
| 33    | H60 | -6.507287E-05 | 4.075232E-04  | -2.464762E-04 |
| 34    | H61 | 3.791023E-04  | -9.356802E-05 | -2.942180E-04 |
| 35    | H62 | 2.867157E-04  | 2.127984E-04  | 2.377116E-04  |
| total |     | 1.417936E-03  | 1.904361E-04  | -1.473653E-04 |

end of program derlb

start of program geopt 29

geometry optimization step 29

reading input hessian of dimension 105  
in five columns format

reading input hessian of dimension 105  
in five columns format

reading input hessian of dimension 105  
in five columns format

Level shifts adjusted to satisfy step-size constraints

Step size: 0.0106751

Cos(theta): 0.8554045

Final level shift: -2.7216740E-01

energy change: 2.5104E-05 \* ( 5.0000E-05 )

gradient maximum: 1.7322E-03 . ( 4.5000E-04 )

gradient rms: 4.8087E-04 . ( 3.0000E-04 )

```

step size:    0.01068  trust radius:    0.01000
displacement maximum:    4.0301E-03 .  (  1.8000E-03 )
displacement rms:        9.5481E-04 *  (  1.2000E-03 )
predicted energy change:    -4.0055E-05    geom step:    1.0675E-02    full step:
1.0675E-02
molecular structure not yet converged...

```

```

center of mass moved by:
  x:    9.2653E-04    y:    -1.1014E-03    z:    4.8047E-04

```

new geometry:

|      | angstroms     |               |               |
|------|---------------|---------------|---------------|
| atom | x             | y             | z             |
| H25  | 0.8714616765  | -3.8371703048 | -2.3931862273 |
| C1   | 1.4816463038  | -2.9630130629 | -2.2826838675 |
| C2   | 3.1108976339  | -0.6686089516 | -2.0079198001 |
| C3   | 1.1358189846  | -1.9672251043 | -1.3781920609 |
| C4   | 2.6286631322  | -2.8043737289 | -3.0367402139 |
| C5   | 3.4353817057  | -1.6699268661 | -2.9006072484 |
| C6   | 1.9606838737  | -0.8386905673 | -1.2625490034 |
| C7   | 0.0266097208  | -1.7995359902 | -0.4346070977 |
| H27  | 2.9088989458  | -3.5636476154 | -3.7393795939 |
| H28  | 4.3203169671  | -1.5790091921 | -3.4990706864 |
| H30  | 3.7097618371  | 0.2083399928  | -1.8768179783 |
| C8   | 0.2182110698  | -0.6251488743 | 0.1813578786  |
| H32  | -0.7772704671 | -2.4821143483 | -0.2807147299 |
| C10  | -0.3879903923 | 0.2534985997  | 1.2508009254  |
| N2   | 1.3808251559  | -0.0253376652 | -0.3051509855 |
| C9   | 1.7055734885  | 1.1755202646  | 0.2780041585  |
| O1   | 2.7015370565  | 1.8228563153  | 0.0519317012  |
| H43  | -0.3286941490 | -0.2518415752 | 2.2072820479  |
| C12  | -1.8361982453 | 0.6183528287  | 0.9713706252  |
| C11  | 0.5715163076  | 1.4984115630  | 1.2616079124  |
| C18  | 1.1579206042  | 1.8266218797  | 2.6425722615  |
| H48  | 0.0445129775  | 2.3642041329  | 0.8810452084  |
| C13  | -3.5474338046 | 1.3999855731  | -0.5301897088 |
| C14  | -4.1052276979 | 0.8832618136  | 1.7388816448  |
| C15  | -4.4900447597 | 1.3170192972  | 0.4844131583  |
| C16  | -2.7835869189 | 0.5356785008  | 1.9790876016  |
| C17  | -2.2317996551 | 1.0516630014  | -0.2889307692 |
| H51  | -5.5108598823 | 1.5829510400  | 0.2940409276  |
| H52  | -2.4953044615 | 0.1952294453  | 2.9547490320  |
| H55  | -3.8403501659 | 1.7288402187  | -1.5074784391 |
| H56  | -4.8265802917 | 0.8107965791  | 2.5280060870  |
| H59  | -1.5129680148 | 1.0982880211  | -1.0825908458 |
| H60  | 1.6487180523  | 0.9572934676  | 3.0654372550  |
| H61  | 0.3758873306  | 2.1492246442  | 3.3196636203  |
| H62  | 1.8882590647  | 2.6196083983  | 2.5465086102  |

nuclear repulsion energy..... 1442.636300728 hartrees

/ end of geometry optimization iteration 29 /

end of program geopt

```

start of program onee
smallest eigenvalue of S:    1.212E-03
number of canonical orbitals.....    210
end of program onee

```

start of program probe  
end of program probe

start of program grid

number of gridpoints:

| atom     | H25 | C1  | C2  | C3  | C4  | C5  | C6  | C7  |
|----------|-----|-----|-----|-----|-----|-----|-----|-----|
| grid # 1 | 73  | 89  | 87  | 90  | 87  | 87  | 85  | 85  |
| grid # 2 | 106 | 100 | 97  | 98  | 98  | 98  | 91  | 92  |
| grid # 3 | 224 | 183 | 182 | 194 | 182 | 182 | 188 | 183 |
| grid # 4 | 224 | 379 | 382 | 406 | 379 | 379 | 372 | 377 |

number of gridpoints:

| atom     | H27 | H28 | H30 | C8  | H32 | C10 | N2  | C9  |
|----------|-----|-----|-----|-----|-----|-----|-----|-----|
| grid # 1 | 73  | 73  | 73  | 86  | 73  | 82  | 99  | 75  |
| grid # 2 | 106 | 106 | 105 | 91  | 106 | 93  | 109 | 80  |
| grid # 3 | 224 | 224 | 220 | 187 | 223 | 175 | 224 | 164 |
| grid # 4 | 224 | 224 | 219 | 374 | 228 | 348 | 402 | 333 |

number of gridpoints:

| atom     | O1  | H43 | C12 | C11 | C18 | H48 | C13 | C14 |
|----------|-----|-----|-----|-----|-----|-----|-----|-----|
| grid # 1 | 111 | 69  | 90  | 81  | 72  | 69  | 87  | 87  |
| grid # 2 | 127 | 96  | 105 | 93  | 74  | 99  | 100 | 100 |
| grid # 3 | 272 | 209 | 194 | 173 | 145 | 216 | 183 | 183 |
| grid # 4 | 475 | 201 | 401 | 355 | 309 | 208 | 379 | 379 |

number of gridpoints:

| atom     | C15 | C16 | C17 | H51 | H52 | H55 | H56 | H59 |
|----------|-----|-----|-----|-----|-----|-----|-----|-----|
| grid # 1 | 89  | 87  | 85  | 73  | 73  | 73  | 73  | 70  |
| grid # 2 | 100 | 100 | 97  | 106 | 103 | 106 | 106 | 102 |
| grid # 3 | 183 | 182 | 181 | 224 | 215 | 224 | 224 | 215 |
| grid # 4 | 379 | 377 | 377 | 224 | 214 | 224 | 224 | 211 |

number of gridpoints:

| atom     | H60 | H61 | H62 | total |
|----------|-----|-----|-----|-------|
| grid # 1 | 71  | 72  | 71  | 2820  |
| grid # 2 | 99  | 99  | 99  | 3487  |
| grid # 3 | 217 | 221 | 220 | 7040  |
| grid # 4 | 218 | 222 | 221 | 10848 |

end of program grid

start of program rwr

recomputing Rwr matrix 15 grid: 4  
end of program rwr

start of program scf

|      | i | u | d | i | g |                  |          | RMS     | maximum |
|------|---|---|---|---|---|------------------|----------|---------|---------|
|      | t | p | i | c | r |                  |          | density | DIIS    |
|      | e | d | i | u | i |                  | energy   | change  | error   |
|      | r | t | s | t | d | total energy     | change   |         |         |
| etot | 1 | N | N | 1 | U | -815.14284111676 |          | 3.4E-05 | 8.5E-04 |
| etot | 2 | Y | Y | 4 | M | -815.14287877129 | 3.8E-05  | 1.2E-05 | 3.5E-04 |
| etot | 3 | Y | Y | 4 | M | -815.14288187736 | 3.1E-06  | 4.0E-06 | 1.1E-04 |
| etot | 4 | Y | N | 4 | M | -815.14288061777 | -1.3E-06 | 0.0E+00 | 0.0E+00 |



Energy components, in hartrees:

```
(A) Nuclear repulsion..... 1442.63630072842
(E) Total one-electron terms..... -3970.75208371619
(I) Total two-electron terms..... 1712.97290237000
(L) Electronic energy..... -2257.77918134618 (E+I)
(N) Total energy..... -815.14288061777 (A+L)
```

SCFE: SCF energy: HF -815.14288061777 hartrees iterations: 4

HOMO energy: -0.29694

LUMO energy: 0.11870

Orbital energies:

```
-20.45259 -15.55233 -11.32165 -11.23596 -11.22264 -11.21401
-11.20689 -11.20108 -11.18766 -11.18656 -11.18596 -11.18554
-11.18407 -11.18387 -11.17905 -11.17695 -11.17687 -11.17556
-11.17457 -11.17242 -1.42323 -1.33306 -1.18071 -1.16265
-1.11556 -1.08827 -1.04107 -1.02784 -1.02031 -1.00053
-0.94710 -0.90620 -0.85430 -0.84429 -0.83192 -0.81096
-0.79389 -0.76170 -0.72106 -0.69220 -0.67860 -0.66893
-0.65829 -0.64070 -0.64037 -0.62704 -0.61177 -0.60595
-0.60419 -0.60194 -0.59211 -0.57798 -0.55707 -0.55559
-0.53877 -0.53194 -0.51665 -0.50757 -0.50015 -0.49657
-0.49149 -0.48609 -0.45935 -0.42236 -0.39365 -0.34984
-0.34296 -0.31519 -0.29694 0.11870 0.13406 0.13877
0.14204 0.20529 0.22573 0.26444 0.27128 0.27421
0.29934
```

end of program scf

start of program derla

end of program derla

start of program rwr

recomputing RwR matrix 15 grid: 4

end of program rwr

start of program derlb

forces (hartrees/bohr) : total

| atom | label | x             | y             | z             |
|------|-------|---------------|---------------|---------------|
| 1    | H25   | -2.421480E-05 | -4.082669E-05 | -3.620988E-05 |
| 2    | C1    | 2.402631E-04  | 1.787689E-04  | -1.728427E-04 |
| 3    | C2    | 1.006648E-04  | -1.078201E-04 | -1.354065E-04 |
| 4    | C3    | 1.592936E-04  | -1.115510E-04 | -1.913749E-04 |
| 5    | C4    | -2.571083E-04 | -2.972422E-05 | 1.958248E-04  |
| 6    | C5    | 6.087421E-05  | -8.848977E-05 | -1.338892E-04 |
| 7    | C6    | 3.606655E-04  | -8.129384E-05 | 2.482216E-05  |
| 8    | C7    | -1.991047E-04 | 6.087127E-04  | -5.614202E-04 |
| 9    | H27   | 5.760924E-05  | 5.239777E-05  | 3.654153E-05  |
| 10   | H28   | -3.947184E-04 | 5.026680E-05  | 2.952371E-04  |
| 11   | H30   | -1.465291E-04 | -1.483397E-04 | 1.195051E-05  |
| 12   | C8    | -1.993866E-04 | 4.300910E-04  | -1.367757E-04 |
| 13   | H32   | 1.544724E-04  | 5.411054E-05  | -7.706662E-05 |
| 14   | C10   | 4.945095E-04  | -1.120474E-04 | -2.162887E-04 |

|       |       |               |               |               |
|-------|-------|---------------|---------------|---------------|
| 15    | N2    | 1.343601E-04  | -6.583381E-04 | 6.025248E-04  |
| 16    | C9    | 3.329858E-04  | 1.645385E-04  | 1.403213E-04  |
| 17    | O1    | -1.977608E-04 | -3.336795E-04 | 2.463235E-04  |
| 18    | H43   | 2.200435E-04  | 1.766815E-04  | -1.720630E-04 |
| 19    | C12   | -1.579770E-04 | -7.311479E-04 | 7.578276E-04  |
| 20    | C11   | -3.627884E-04 | 3.893172E-04  | -1.870219E-04 |
| 21    | C18   | -3.316296E-04 | 1.165485E-04  | 6.195855E-05  |
| 22    | H48   | 3.201243E-04  | -3.144429E-04 | -4.074456E-04 |
| 23    | C13   | 4.634872E-04  | -4.169900E-06 | -7.251404E-05 |
| 24    | C14   | 5.702396E-04  | 2.203143E-07  | -1.116968E-05 |
| 25    | C15   | 1.811637E-04  | 2.291774E-05  | -2.485849E-05 |
| 26    | C16   | -3.753569E-04 | 3.606406E-04  | -7.678446E-05 |
| 27    | C17   | -6.342739E-04 | 1.612402E-04  | 7.773192E-05  |
| 28    | H51   | 2.483131E-04  | -8.896122E-06 | 5.101693E-05  |
| 29    | H52   | 6.295316E-05  | -5.875142E-05 | 9.177141E-05  |
| 30    | H55   | 1.412103E-04  | 1.079184E-05  | 3.711564E-05  |
| 31    | H56   | -5.328302E-05 | -2.352958E-05 | 2.194740E-04  |
| 32    | H59   | 1.284464E-04  | 7.371313E-05  | -2.509467E-04 |
| 33    | H60   | 4.680046E-05  | 1.144589E-04  | -1.428912E-04 |
| 34    | H61   | 1.590259E-04  | -4.181104E-05 | -7.457538E-05 |
| 35    | H62   | 1.389224E-04  | 9.546446E-05  | 9.553130E-05  |
| ----- |       |               |               |               |
|       | total | 1.442297E-03  | 1.660215E-04  | -1.355719E-04 |

end of program derlb

start of program geopt 30

geometry optimization step 30

reading input hessian of dimension 105  
in five columns format  
reading input hessian of dimension 105  
in five columns format  
reading input hessian of dimension 105  
in five columns format

Level shifts adjusted to satisfy step-size constraints

Step size: 0.0208413  
Cos(theta): 0.8610597

Final level shift: -1.1089669E-01

energy change: -3.8007E-05 \* ( 5.0000E-05 )  
gradient maximum: 1.0579E-03 . ( 4.5000E-04 )  
gradient rms: 2.7191E-04 \* ( 3.0000E-04 )  
step size: 0.02084 trust radius: 0.02000  
displacement maximum: 8.6634E-03 . ( 1.8000E-03 )  
displacement rms: 1.8641E-03 . ( 1.2000E-03 )  
predicted energy change: -5.1362E-05 geom step: 2.0841E-02 full step:  
2.0841E-02  
molecular structure not yet converged...

center of mass moved by:

x: 1.8817E-03 y: -1.6619E-03 z: 8.4341E-04

new geometry:

|      | angstroms    |               |               |
|------|--------------|---------------|---------------|
| atom | x            | y             | z             |
| H25  | 0.8660293121 | -3.8322109784 | -2.4033618609 |
| C1   | 1.4792681908 | -2.9606225236 | -2.2890314817 |

|     |               |               |               |
|-----|---------------|---------------|---------------|
| C2  | 3.1163905785  | -0.6730504482 | -2.0035643214 |
| C3  | 1.1348217750  | -1.9656745849 | -1.3832320359 |
| C4  | 2.6288913454  | -2.8044463212 | -3.0390043350 |
| C5  | 3.4392747636  | -1.6732800225 | -2.8977096130 |
| C6  | 1.9637110545  | -0.8406340578 | -1.2619605383 |
| C7  | 0.0233596734  | -1.7957896032 | -0.4430075303 |
| H27 | 2.9089169741  | -3.5628677398 | -3.7425606436 |
| H28 | 4.3257342993  | -1.5835771916 | -3.4931747274 |
| H30 | 3.7176917979  | 0.2013689848  | -1.8686028095 |
| C8  | 0.2170274356  | -0.6235256282 | 0.1762580213  |
| H32 | -0.7832562220 | -2.4758528470 | -0.2936561026 |
| C10 | -0.3886683239 | 0.2540363189  | 1.2465517034  |
| N2  | 1.3833875895  | -0.0271840044 | -0.3049611261 |
| C9  | 1.7093162504  | 1.1723192929  | 0.2805523031  |
| O1  | 2.7085184261  | 1.8163507869  | 0.0601453951  |
| H43 | -0.3280123757 | -0.2523623725 | 2.2022133222  |
| C12 | -1.8372051301 | 0.6186113720  | 0.9706005684  |
| C11 | 0.5707440011  | 1.4990423434  | 1.2575355174  |
| C18 | 1.1493303296  | 1.8349082881  | 2.6398062724  |
| H48 | 0.0453512225  | 2.3625159249  | 0.8698272068  |
| C13 | -3.5518342801 | 1.4010301977  | -0.5260582684 |
| C14 | -4.1036780099 | 0.8831730168  | 1.7444080717  |
| C15 | -4.4915500441 | 1.3174490268  | 0.4911040755  |
| C16 | -2.7818366483 | 0.5355536250  | 1.9808715156  |
| C17 | -2.2360742661 | 1.0526203626  | -0.2884345835 |
| H51 | -5.5126913193 | 1.5833217328  | 0.3036205576  |
| H52 | -2.4908165009 | 0.1942678277  | 2.9556207238  |
| H55 | -3.8472145109 | 1.7303428332  | -1.5023638403 |
| H56 | -4.8230399737 | 0.8100559847  | 2.5355387877  |
| H59 | -1.5194434119 | 1.0998821720  | -1.0842023891 |
| H60 | 1.6386151524  | 0.9685632086  | 3.0696160566  |
| H61 | 0.3634195290  | 2.1602121619  | 3.3106357224  |
| H62 | 1.8794631657  | 2.6282354487  | 2.5443108095  |

nuclear repulsion energy..... 1442.555067466 hartrees

/ end of geometry optimization iteration 30 /

end of program geopt

start of program onee

smallest eigenvalue of S: 1.211E-03

number of canonical orbitals..... 210

end of program onee

start of program probe

end of program probe

start of program grid

number of gridpoints:

| atom     | H25 | C1  | C2  | C3  | C4  | C5  | C6  | C7  |
|----------|-----|-----|-----|-----|-----|-----|-----|-----|
| grid # 1 | 73  | 89  | 87  | 90  | 87  | 87  | 85  | 85  |
| grid # 2 | 106 | 100 | 97  | 98  | 98  | 98  | 91  | 92  |
| grid # 3 | 224 | 183 | 182 | 194 | 182 | 182 | 188 | 183 |
| grid # 4 | 224 | 379 | 381 | 404 | 379 | 379 | 372 | 377 |

number of gridpoints:

|          |     |     |     |     |     |     |     |     |
|----------|-----|-----|-----|-----|-----|-----|-----|-----|
| atom     | H27 | H28 | H30 | C8  | H32 | C10 | N2  | C9  |
| grid # 1 | 73  | 73  | 73  | 86  | 73  | 82  | 99  | 75  |
| grid # 2 | 106 | 106 | 105 | 91  | 106 | 93  | 109 | 80  |
| grid # 3 | 224 | 224 | 220 | 187 | 223 | 175 | 224 | 164 |
| grid # 4 | 224 | 224 | 219 | 374 | 228 | 348 | 401 | 333 |

number of gridpoints:

|          |     |     |     |     |     |     |     |     |
|----------|-----|-----|-----|-----|-----|-----|-----|-----|
| atom     | O1  | H43 | C12 | C11 | C18 | H48 | C13 | C14 |
| grid # 1 | 111 | 69  | 90  | 81  | 71  | 69  | 88  | 87  |
| grid # 2 | 127 | 96  | 105 | 93  | 76  | 99  | 100 | 100 |
| grid # 3 | 272 | 209 | 194 | 173 | 149 | 216 | 183 | 183 |
| grid # 4 | 475 | 201 | 401 | 356 | 306 | 209 | 378 | 379 |

number of gridpoints:

|          |     |     |     |     |     |     |     |     |
|----------|-----|-----|-----|-----|-----|-----|-----|-----|
| atom     | C15 | C16 | C17 | H51 | H52 | H55 | H56 | H59 |
| grid # 1 | 89  | 87  | 85  | 73  | 73  | 73  | 73  | 70  |
| grid # 2 | 100 | 100 | 97  | 106 | 103 | 106 | 106 | 102 |
| grid # 3 | 183 | 182 | 181 | 224 | 214 | 224 | 224 | 215 |
| grid # 4 | 379 | 377 | 377 | 224 | 214 | 224 | 224 | 211 |

number of gridpoints:

|          |     |     |     |       |
|----------|-----|-----|-----|-------|
| atom     | H60 | H61 | H62 | total |
| grid # 1 | 71  | 72  | 71  | 2820  |
| grid # 2 | 99  | 99  | 99  | 3489  |
| grid # 3 | 217 | 221 | 220 | 7043  |
| grid # 4 | 218 | 222 | 221 | 10842 |

end of program grid

start of program rwr

recomputing Rwr matrix 15 grid: 4

end of program rwr

start of program scf

|      | i | u | d | i | g |                  |         | RMS     | maximum |
|------|---|---|---|---|---|------------------|---------|---------|---------|
|      | t | p | i | c | r |                  |         | density | DIIS    |
|      | e | d | i | u | i |                  | energy  | change  | error   |
|      | r | t | s | t | d | total energy     | change  |         |         |
| etot | 1 | N | N | 1 | U | -815.14274629560 |         | 5.5E-05 | 1.8E-03 |
| etot | 2 | Y | Y | 4 | M | -815.14289288404 | 1.5E-04 | 2.3E-05 | 7.4E-04 |
| etot | 3 | Y | Y | 4 | M | -815.14290806696 | 1.5E-05 | 7.9E-06 | 2.2E-04 |
| etot | 4 | Y | Y | 4 | M | -815.14290973653 | 1.7E-06 | 1.9E-06 | 4.8E-05 |
| etot | 5 | Y | N | 4 | M | -815.14290998481 | 2.5E-07 | 0.0E+00 | 0.0E+00 |

Energy components, in hartrees:

|     |                               |                   |       |
|-----|-------------------------------|-------------------|-------|
| (A) | Nuclear repulsion.....        | 1442.55506746588  |       |
| (E) | Total one-electron terms..... | -3970.58648362099 |       |
| (I) | Total two-electron terms..... | 1712.88850617031  |       |
| (L) | Electronic energy.....        | -2257.69797745068 | (E+I) |
| (N) | Total energy.....             | -815.14290998481  | (A+L) |

SCFE: SCF energy: HF -815.14290998481 hartrees iterations: 5

HOMO energy: -0.29691

LUMO energy: 0.11875

Orbital energies:

|           |           |           |           |           |           |
|-----------|-----------|-----------|-----------|-----------|-----------|
| -20.45267 | -15.55227 | -11.32163 | -11.23589 | -11.22260 | -11.21396 |
| -11.20686 | -11.20109 | -11.18757 | -11.18655 | -11.18592 | -11.18556 |
| -11.18410 | -11.18384 | -11.17897 | -11.17686 | -11.17680 | -11.17551 |
| -11.17441 | -11.17237 | -1.42333  | -1.33311  | -1.18084  | -1.16276  |
| -1.11562  | -1.08828  | -1.04109  | -1.02804  | -1.02040  | -1.00056  |
| -0.94715  | -0.90626  | -0.85429  | -0.84429  | -0.83206  | -0.81099  |
| -0.79392  | -0.76174  | -0.72110  | -0.69239  | -0.67863  | -0.66898  |
| -0.65830  | -0.64066  | -0.64047  | -0.62706  | -0.61184  | -0.60601  |
| -0.60425  | -0.60209  | -0.59212  | -0.57802  | -0.55704  | -0.55555  |
| -0.53872  | -0.53207  | -0.51668  | -0.50759  | -0.50020  | -0.49659  |
| -0.49152  | -0.48614  | -0.45940  | -0.42241  | -0.39367  | -0.35000  |
| -0.34294  | -0.31521  | -0.29691  | 0.11875   | 0.13405   | 0.13878   |
| 0.14204   | 0.20533   | 0.22578   | 0.26444   | 0.27137   | 0.27436   |
| 0.29922   |           |           |           |           |           |

end of program scf

start of program derla  
end of program derla

start of program rwr  
recomputing RWR matrix 15 grid: 4  
end of program rwr

start of program derlb

forces (hartrees/bohr) : total

| atom | label | x             | y             | z             |
|------|-------|---------------|---------------|---------------|
| 1    | H25   | -2.051522E-05 | -6.764223E-06 | -3.942405E-05 |
| 2    | C1    | 8.775645E-05  | 1.004751E-04  | -6.534047E-05 |
| 3    | C2    | 5.630100E-05  | -8.456519E-05 | -9.716387E-05 |
| 4    | C3    | 1.298569E-04  | 1.538558E-05  | -2.835017E-05 |
| 5    | C4    | 1.607664E-05  | 5.486790E-06  | 2.375553E-05  |
| 6    | C5    | -1.759749E-05 | -9.659544E-05 | -5.966782E-05 |
| 7    | C6    | 3.671409E-05  | -1.366190E-04 | 7.461461E-05  |
| 8    | C7    | -2.762498E-04 | 5.424871E-04  | -6.160270E-04 |
| 9    | H27   | 2.506194E-05  | 5.186647E-06  | -6.452225E-06 |
| 10   | H28   | -7.535678E-05 | -1.235977E-05 | 5.082610E-05  |
| 11   | H30   | 7.969046E-06  | -3.802506E-05 | -6.605250E-06 |
| 12   | C8    | -2.494289E-04 | 3.054807E-04  | -2.275347E-04 |
| 13   | H32   | 1.006061E-05  | -2.143657E-05 | -1.547601E-05 |
| 14   | C10   | 5.872659E-04  | -4.210294E-05 | -1.582728E-04 |
| 15   | N2    | 2.952738E-04  | -5.320834E-04 | 6.129639E-04  |
| 16   | C9    | 2.625630E-04  | 4.852846E-05  | 2.123701E-04  |
| 17   | O1    | -3.511851E-05 | -2.357916E-04 | 1.929524E-04  |
| 18   | H43   | 3.147886E-04  | 1.203774E-04  | -2.302228E-05 |
| 19   | C12   | -1.589432E-04 | -6.689990E-04 | 7.112721E-04  |
| 20   | C11   | -3.057941E-04 | 3.741394E-04  | -1.582928E-04 |
| 21   | C18   | -3.242370E-04 | 2.396581E-04  | -8.552424E-05 |
| 22   | H48   | 2.494714E-04  | -2.236363E-04 | -4.572753E-04 |
| 23   | C13   | 1.380184E-04  | 4.455916E-05  | -4.129527E-05 |
| 24   | C14   | 2.065927E-04  | 3.283868E-05  | 3.713833E-05  |
| 25   | C15   | 6.889160E-05  | 6.032397E-05  | -3.136971E-05 |
| 26   | C16   | -7.196840E-05 | 2.252362E-04  | 4.499926E-05  |
| 27   | C17   | -1.682442E-04 | 7.719094E-05  | 3.913180E-05  |
| 28   | H51   | 7.373208E-05  | 4.262176E-05  | 1.944865E-05  |

|       |       |               |               |               |
|-------|-------|---------------|---------------|---------------|
| 29    | H52   | 3.116120E-05  | -2.280932E-06 | -1.842582E-05 |
| 30    | H55   | 8.315011E-05  | 3.651504E-05  | 7.906755E-06  |
| 31    | H56   | -3.013610E-06 | 1.639404E-05  | 9.528406E-05  |
| 32    | H59   | 1.354807E-04  | 3.444385E-05  | -1.443632E-04 |
| 33    | H60   | 1.478419E-04  | -8.371876E-05 | -5.164987E-05 |
| 34    | H61   | -4.803084E-06 | 3.065945E-06  | 5.758170E-05  |
| 35    | H62   | 1.125341E-04  | 5.181814E-05  | 3.511478E-06  |
| ----- |       |               |               |               |
|       | total | 1.365292E-03  | 1.972349E-04  | -1.477760E-04 |

end of program derlb

start of program geopt 31

geometry optimization step 31

reading input hessian of dimension 105

in five columns format

reading input hessian of dimension 105

in five columns format

Hessian eigenvalues:

|              |             |             |             |             |
|--------------|-------------|-------------|-------------|-------------|
| -4.09040E+00 | 0.00000E+00 | 0.00000E+00 | 0.00000E+00 | 0.00000E+00 |
| 0.00000E+00  | 0.00000E+00 | 0.00000E+00 | 0.00000E+00 | 0.00000E+00 |
| 0.00000E+00  | 0.00000E+00 | 0.00000E+00 | 0.00000E+00 | 0.00000E+00 |
| 0.00000E+00  | 0.00000E+00 | 0.00000E+00 | 0.00000E+00 | 0.00000E+00 |
| 0.00000E+00  | 0.00000E+00 | 0.00000E+00 | 0.00000E+00 | 0.00000E+00 |
| 0.00000E+00  | 0.00000E+00 | 5.00000E-04 | 6.97072E-03 | 1.66592E-02 |
| 2.16079E-02  | 2.82322E-02 | 3.02614E-02 | 3.06977E-02 | 3.12066E-02 |
| 3.21365E-02  | 3.36547E-02 | 3.72705E-02 | 4.07111E-02 | 4.47474E-02 |
| 5.16853E-02  | 5.65834E-02 | 6.68761E-02 | 7.12834E-02 | 7.33470E-02 |
| 7.58093E-02  | 7.71930E-02 | 8.56713E-02 | 9.11005E-02 | 1.01371E-01 |
| 1.13235E-01  | 1.16291E-01 | 1.21295E-01 | 1.32943E-01 | 1.33676E-01 |
| 1.42629E-01  | 1.46347E-01 | 1.49760E-01 | 1.52712E-01 | 1.56163E-01 |
| 1.62941E-01  | 1.64114E-01 | 1.69326E-01 | 1.74201E-01 | 1.82953E-01 |
| 1.88379E-01  | 1.89802E-01 | 2.01725E-01 | 2.09826E-01 | 2.12135E-01 |
| 2.13588E-01  | 2.24552E-01 | 2.26246E-01 | 2.32065E-01 | 2.37818E-01 |
| 2.47277E-01  | 2.49106E-01 | 2.56914E-01 | 2.66335E-01 | 2.77074E-01 |
| 2.77858E-01  | 2.86309E-01 | 2.94166E-01 | 3.04742E-01 | 3.06553E-01 |
| 3.13862E-01  | 3.18451E-01 | 3.20654E-01 | 3.25150E-01 | 3.27106E-01 |
| 3.32470E-01  | 3.38341E-01 | 3.43951E-01 | 3.48563E-01 | 3.53882E-01 |
| 3.70415E-01  | 3.73193E-01 | 3.78149E-01 | 3.82664E-01 | 3.96370E-01 |
| 3.98240E-01  | 4.08370E-01 | 4.20351E-01 | 4.32522E-01 | 4.47834E-01 |
| 4.52904E-01  | 4.63354E-01 | 4.69873E-01 | 4.77078E-01 | 4.83062E-01 |
| 4.97901E-01  | 5.18795E-01 | 5.26182E-01 | 5.39431E-01 | 5.65357E-01 |
| 5.79910E-01  | 6.05408E-01 | 6.32019E-01 | 6.74188E-01 | 7.34899E-01 |
| 7.45555E-01  | 7.83401E-01 | 8.57813E-01 | 1.02740E+00 | 1.16586E+00 |

WARNING: Hessian has wrong number of negative eigenvalues

WARNING: positive P-RFO shift not converged: using initial-guess shift

WARNING: failed to converge rfo shift adjustments

Level shifts adjusted to satisfy step-size constraints

Step size: 0.0497028

Cos(theta): 0.0572212

Final level shift: -4.0927321E+00

energy change: -2.9367E-05 \* ( 5.0000E-05 )

gradient maximum: 1.0424E-03 . ( 4.5000E-04 )

gradient rms: 2.3207E-04 \* ( 3.0000E-04 )

step size: 0.04970 trust radius: 0.02828  
 displacement maximum: 2.8505E-02 . ( 1.8000E-03 )  
 displacement rms: 4.4455E-03 . ( 1.2000E-03 )  
 predicted energy change: -5.0590E-03 geom step: 4.9703E-02 full step:  
 4.9703E-02  
 molecular structure not yet converged...

center of mass moved by:  
 x: 3.9325E-03 y: 2.8549E-04 z: -2.3576E-03

new geometry:

|      | angstroms     |               |               |
|------|---------------|---------------|---------------|
| atom | x             | y             | z             |
| H25  | 0.8740169175  | -3.8378248023 | -2.4136404539 |
| C1   | 1.4867393214  | -2.9648214187 | -2.2911652812 |
| C2   | 3.1252915746  | -0.6814921308 | -1.9934262157 |
| C3   | 1.1379664970  | -1.9689807987 | -1.3850419577 |
| C4   | 2.6377945227  | -2.8136871507 | -3.0352183088 |
| C5   | 3.4501911580  | -1.6841290950 | -2.8876560937 |
| C6   | 1.9667787143  | -0.8472021954 | -1.2583795091 |
| C7   | 0.0301138242  | -1.7909182160 | -0.4514795252 |
| H27  | 2.9168168215  | -3.5771014069 | -3.7385003557 |
| H28  | 4.3387028967  | -1.5943607912 | -3.4762671934 |
| H30  | 3.7283732542  | 0.1926596683  | -1.8551532056 |
| C8   | 0.2226755754  | -0.6208717051 | 0.1701213513  |
| H32  | -0.7802598636 | -2.4664343679 | -0.3023257614 |
| C10  | -0.3926871148 | 0.2522802634  | 1.2361566355  |
| N2   | 1.3890860130  | -0.0274951104 | -0.3067510499 |
| C9   | 1.7093709884  | 1.1754358472  | 0.2769321220  |
| O1   | 2.7210152248  | 1.8251600132  | 0.0469382911  |
| H43  | -0.3432595507 | -0.2625783072 | 2.1873065235  |
| C12  | -1.8405135028 | 0.6171013363  | 0.9603386575  |
| C11  | 0.5660353974  | 1.4982635749  | 1.2497517134  |
| C18  | 1.1341602984  | 1.8333629254  | 2.6388617473  |
| H48  | 0.0372234724  | 2.3602661804  | 0.8553752609  |
| C13  | -3.5753485672 | 1.4152933478  | -0.5149079791 |
| C14  | -4.1013867560 | 0.8824365175  | 1.7584273208  |
| C15  | -4.5030495084 | 1.3255087089  | 0.5122263045  |
| C16  | -2.7749519171 | 0.5311391910  | 1.9795295361  |
| C17  | -2.2549892444 | 1.0618434335  | -0.2932654993 |
| H51  | -5.5247851144 | 1.5954624062  | 0.3354471288  |
| H52  | -2.4711244404 | 0.1914515758  | 2.9535529241  |
| H55  | -3.8828800132 | 1.7520495135  | -1.4895707014 |
| H56  | -4.8102792253 | 0.8036273705  | 2.5587888276  |
| H59  | -1.5465394980 | 1.1233237190  | -1.1037268742 |
| H60  | 1.6213079174  | 0.9661125677  | 3.0788139638  |
| H61  | 0.3413783781  | 2.1580466891  | 3.3073112283  |
| H62  | 1.8681222500  | 2.6245679418  | 2.5485914213  |

nuclear repulsion energy..... 1441.081895109 hartrees

/ end of geometry optimization iteration 31 /

end of program geopt

start of program onee  
 smallest eigenvalue of S: 1.202E-03  
 number of canonical orbitals..... 210  
 end of program onee

start of program probe  
end of program probe

start of program grid

number of gridpoints:

| atom     | H25 | C1  | C2  | C3  | C4  | C5  | C6  | C7  |
|----------|-----|-----|-----|-----|-----|-----|-----|-----|
| grid # 1 | 73  | 89  | 87  | 90  | 87  | 87  | 85  | 85  |
| grid # 2 | 106 | 99  | 99  | 98  | 98  | 99  | 91  | 92  |
| grid # 3 | 224 | 183 | 183 | 195 | 182 | 182 | 186 | 182 |
| grid # 4 | 224 | 379 | 383 | 404 | 379 | 377 | 372 | 377 |

number of gridpoints:

| atom     | H27 | H28 | H30 | C8  | H32 | C10 | N2  | C9  |
|----------|-----|-----|-----|-----|-----|-----|-----|-----|
| grid # 1 | 73  | 73  | 73  | 86  | 73  | 81  | 99  | 75  |
| grid # 2 | 106 | 106 | 105 | 91  | 106 | 92  | 109 | 80  |
| grid # 3 | 224 | 224 | 220 | 187 | 223 | 175 | 223 | 164 |
| grid # 4 | 224 | 224 | 219 | 372 | 227 | 350 | 401 | 338 |

number of gridpoints:

| atom     | O1  | H43 | C12 | C11 | C18 | H48 | C13 | C14 |
|----------|-----|-----|-----|-----|-----|-----|-----|-----|
| grid # 1 | 111 | 68  | 90  | 81  | 71  | 69  | 88  | 87  |
| grid # 2 | 127 | 96  | 105 | 94  | 75  | 100 | 100 | 98  |
| grid # 3 | 272 | 210 | 193 | 171 | 142 | 217 | 184 | 183 |
| grid # 4 | 475 | 201 | 400 | 351 | 307 | 206 | 380 | 378 |

number of gridpoints:

| atom     | C15 | C16 | C17 | H51 | H52 | H55 | H56 | H59 |
|----------|-----|-----|-----|-----|-----|-----|-----|-----|
| grid # 1 | 87  | 87  | 85  | 73  | 73  | 73  | 73  | 71  |
| grid # 2 | 100 | 100 | 98  | 106 | 103 | 106 | 106 | 102 |
| grid # 3 | 183 | 182 | 182 | 224 | 214 | 224 | 224 | 216 |
| grid # 4 | 379 | 378 | 378 | 224 | 214 | 224 | 224 | 213 |

number of gridpoints:

| atom     | H60 | H61 | H62 | total |
|----------|-----|-----|-----|-------|
| grid # 1 | 71  | 72  | 72  | 2818  |
| grid # 2 | 99  | 99  | 99  | 3490  |
| grid # 3 | 217 | 221 | 220 | 7036  |
| grid # 4 | 220 | 221 | 221 | 10844 |

end of program grid

start of program rwr

recomputing RwR matrix 15 grid: 4

end of program rwr

start of program scf

|      | i | u | d | i | g |                  |         | RMS     | maximum |
|------|---|---|---|---|---|------------------|---------|---------|---------|
|      | t | p | i | c | r |                  |         | density | DIIS    |
|      | e | d | i | u | i |                  | energy  | change  | error   |
|      | r | t | s | t | d | total energy     | change  |         |         |
| etot | 1 | N | N | 1 | U | -815.14130215200 |         | 1.7E-04 | 3.3E-03 |
| etot | 2 | Y | Y | 4 | M | -815.14205935245 | 7.6E-04 | 6.3E-05 | 9.9E-04 |
| etot | 3 | Y | Y | 4 | M | -815.14212422012 | 6.5E-05 | 2.5E-05 | 9.4E-04 |
| etot | 4 | Y | Y | 4 | M | -815.14213866210 | 1.4E-05 | 1.1E-05 | 2.1E-04 |
| etot | 5 | Y | Y | 4 | M | -815.14213925520 | 5.9E-07 | 3.9E-06 | 1.3E-04 |



etot 6 N N 1 U -815.14214611940 6.9E-06 0.0E+00 0.0E+00

Energy components, in hartrees:

(A) Nuclear repulsion..... 1441.08189510906  
(E) Total one-electron terms..... -3967.65054297617  
(I) Total two-electron terms..... 1711.42650174770  
(L) Electronic energy..... -2256.22404122847 (E+I)  
(N) Total energy..... -815.14214611940 (A+L)

SCFE: SCF energy: HF -815.14214611940 hartrees iterations: 6

HOMO energy: -0.29641

LUMO energy: 0.11758

Orbital energies:

|           |           |           |           |           |           |
|-----------|-----------|-----------|-----------|-----------|-----------|
| -20.45204 | -15.55336 | -11.32349 | -11.23517 | -11.22239 | -11.21448 |
| -11.20909 | -11.20205 | -11.18757 | -11.18739 | -11.18692 | -11.18683 |
| -11.18606 | -11.18456 | -11.17918 | -11.17703 | -11.17613 | -11.17608 |
| -11.17543 | -11.17271 | -1.41424  | -1.33260  | -1.18071  | -1.16293  |
| -1.11591  | -1.08904  | -1.04131  | -1.02721  | -1.02067  | -1.00037  |
| -0.94719  | -0.90738  | -0.85414  | -0.84432  | -0.83196  | -0.81144  |
| -0.79393  | -0.76173  | -0.72037  | -0.69163  | -0.67866  | -0.66874  |
| -0.65818  | -0.64017  | -0.63975  | -0.62627  | -0.61134  | -0.60403  |
| -0.60377  | -0.60120  | -0.59141  | -0.57801  | -0.55728  | -0.55504  |
| -0.53839  | -0.53088  | -0.51624  | -0.50748  | -0.49994  | -0.49683  |
| -0.49157  | -0.48605  | -0.45804  | -0.42336  | -0.39341  | -0.34985  |
| -0.34349  | -0.31591  | -0.29641  | 0.11758   | 0.13303   | 0.13733   |
| 0.14140   | 0.20467   | 0.22478   | 0.26346   | 0.27113   | 0.27384   |
| 0.29798   |           |           |           |           |           |

end of program scf

start of program derla

end of program derla

start of program rwr

recomputing RWR matrix 15 grid: 4

end of program rwr

start of program derlb

forces (hartrees/bohr) : total

| atom | label | x             | y             | z             |
|------|-------|---------------|---------------|---------------|
| 1    | H25   | 1.002550E-04  | 1.319520E-03  | 8.160926E-04  |
| 2    | C1    | -2.864101E-03 | -1.459598E-03 | 8.926958E-04  |
| 3    | C2    | 2.484690E-04  | -1.945250E-03 | -1.671730E-03 |
| 4    | C3    | 2.139377E-03  | -1.245815E-04 | -1.365837E-03 |
| 5    | C4    | 1.640963E-03  | -2.331649E-04 | -1.092182E-03 |
| 6    | C5    | -7.582049E-04 | 1.858203E-03  | 1.699483E-03  |
| 7    | C6    | 5.386234E-03  | 2.338160E-03  | -2.596505E-03 |
| 8    | C7    | -5.013260E-03 | -2.306836E-03 | 1.373438E-03  |
| 9    | H27   | -1.567901E-04 | 2.030549E-03  | 1.397841E-03  |
| 10   | H28   | 1.245795E-03  | -5.166798E-05 | -9.132537E-04 |
| 11   | H30   | -5.880327E-04 | -8.368117E-04 | -6.734541E-05 |
| 12   | C8    | -3.058885E-03 | -3.499521E-04 | -7.855526E-04 |

|       |       |               |               |               |
|-------|-------|---------------|---------------|---------------|
| 13    | H32   | -1.447583E-04 | -2.242942E-04 | -6.757707E-05 |
| 14    | C10   | 1.379611E-03  | -9.063864E-05 | -2.324004E-03 |
| 15    | N2    | 1.834741E-04  | 1.072775E-03  | 2.234669E-03  |
| 16    | C9    | 2.030512E-02  | 9.367724E-03  | -6.312617E-03 |
| 17    | O1    | -2.124309E-02 | -1.254340E-02 | 6.020019E-03  |
| 18    | H43   | 1.555165E-03  | 1.130415E-03  | 7.595824E-04  |
| 19    | C12   | -1.878739E-03 | 7.098464E-04  | -1.044459E-03 |
| 20    | C11   | -4.686581E-04 | 2.190783E-03  | 1.218545E-03  |
| 21    | C18   | -1.171353E-04 | -4.412562E-04 | 1.641496E-03  |
| 22    | H48   | 1.528766E-03  | -1.442571E-03 | 9.086033E-04  |
| 23    | C13   | 2.370680E-03  | -4.506079E-04 | -1.542463E-03 |
| 24    | C14   | 2.108015E-03  | -7.148117E-04 | 7.396690E-04  |
| 25    | C15   | 2.246239E-04  | -1.726797E-04 | 2.729960E-04  |
| 26    | C16   | -2.424755E-03 | 9.721200E-04  | 6.478413E-04  |
| 27    | C17   | 1.723116E-03  | 7.906501E-04  | -2.664252E-03 |
| 28    | H51   | -2.236133E-04 | -9.918889E-05 | 4.656033E-04  |
| 29    | H52   | -8.942324E-04 | 1.100310E-04  | -1.708197E-03 |
| 30    | H55   | 1.275518E-03  | -8.300922E-04 | 2.930355E-03  |
| 31    | H56   | -6.827451E-05 | 3.090640E-04  | -2.419881E-04 |
| 32    | H59   | -2.278817E-03 | -9.870716E-04 | 3.732971E-03  |
| 33    | H60   | -1.176210E-03 | 1.507236E-03  | -1.979119E-03 |
| 34    | H61   | 1.610472E-03  | -2.044818E-04 | -1.856401E-03 |
| 35    | H62   | -5.290356E-04 | 1.172643E-04  | 2.720101E-04  |
| ----- |       |               |               |               |
|       | total | 1.139062E-03  | 3.153796E-04  | -2.095699E-04 |

end of program derlb

start of program geopt 32

geometry optimization step 32  
 reading input hessian of dimension 105  
 in five columns format  
 reading input hessian of dimension 105  
 in five columns format  
 reading input hessian of dimension 105  
 in five columns format  
 \*\* restarting optimization from step 31 \*\*

Hessian eigenvalues:

|              |             |             |             |             |
|--------------|-------------|-------------|-------------|-------------|
| -2.45157E+00 | 0.00000E+00 | 0.00000E+00 | 0.00000E+00 | 0.00000E+00 |
| 0.00000E+00  | 0.00000E+00 | 0.00000E+00 | 0.00000E+00 | 0.00000E+00 |
| 0.00000E+00  | 0.00000E+00 | 0.00000E+00 | 0.00000E+00 | 0.00000E+00 |
| 0.00000E+00  | 0.00000E+00 | 0.00000E+00 | 0.00000E+00 | 0.00000E+00 |
| 0.00000E+00  | 0.00000E+00 | 0.00000E+00 | 0.00000E+00 | 0.00000E+00 |
| 0.00000E+00  | 0.00000E+00 | 5.00000E-04 | 3.22831E-03 | 1.95788E-02 |
| 2.23668E-02  | 2.83085E-02 | 2.95499E-02 | 3.07469E-02 | 3.13562E-02 |
| 3.16719E-02  | 3.40783E-02 | 3.77272E-02 | 4.36008E-02 | 4.70212E-02 |
| 5.47491E-02  | 6.61232E-02 | 7.04255E-02 | 7.25842E-02 | 7.56677E-02 |
| 8.09144E-02  | 8.16887E-02 | 8.95661E-02 | 9.92070E-02 | 1.13675E-01 |
| 1.14500E-01  | 1.18667E-01 | 1.27853E-01 | 1.37032E-01 | 1.38394E-01 |
| 1.44829E-01  | 1.49042E-01 | 1.52171E-01 | 1.56173E-01 | 1.61934E-01 |
| 1.68598E-01  | 1.71579E-01 | 1.80575E-01 | 1.84090E-01 | 1.88577E-01 |
| 1.96030E-01  | 2.00666E-01 | 2.05755E-01 | 2.11917E-01 | 2.18536E-01 |
| 2.23275E-01  | 2.30153E-01 | 2.31542E-01 | 2.41041E-01 | 2.46930E-01 |
| 2.55975E-01  | 2.61981E-01 | 2.68057E-01 | 2.83560E-01 | 2.85748E-01 |
| 2.92153E-01  | 2.96894E-01 | 2.99922E-01 | 3.07469E-01 | 3.11050E-01 |
| 3.16926E-01  | 3.23327E-01 | 3.25165E-01 | 3.32366E-01 | 3.36353E-01 |
| 3.41413E-01  | 3.45293E-01 | 3.53768E-01 | 3.64474E-01 | 3.66180E-01 |
| 3.76690E-01  | 3.82687E-01 | 3.88511E-01 | 3.97050E-01 | 4.00622E-01 |
| 4.07182E-01  | 4.12870E-01 | 4.26660E-01 | 4.39355E-01 | 4.47745E-01 |

|             |             |             |             |             |
|-------------|-------------|-------------|-------------|-------------|
| 4.60030E-01 | 4.62146E-01 | 4.84170E-01 | 4.84612E-01 | 4.90203E-01 |
| 4.93846E-01 | 5.07126E-01 | 5.28186E-01 | 5.31382E-01 | 5.63448E-01 |
| 5.69052E-01 | 6.12130E-01 | 6.20044E-01 | 6.53981E-01 | 6.58503E-01 |
| 7.34149E-01 | 8.40260E-01 | 8.91243E-01 | 9.34513E-01 | 1.13266E+00 |

WARNING: Hessian has wrong number of negative eigenvalues  
 WARNING: positive P-RFO shift not converged: using initial-guess shift

WARNING: failed to converge rfo shift adjustments

Level shifts adjusted to satisfy step-size constraints

Step size: 0.0161090  
 Cos(theta): 0.1972358

Final level shift: -2.4732431E+00

energy change: 7.6387E-04 . ( 5.0000E-05 )  
 gradient maximum: 1.0424E-03 . ( 4.5000E-04 )  
 gradient rms: 2.3207E-04 \* ( 3.0000E-04 )  
 step size: 0.01611 trust radius: 0.01414  
 displacement maximum: 4.4509E-03 . ( 1.8000E-03 )  
 displacement rms: 1.4408E-03 . ( 1.2000E-03 )  
 predicted energy change: -3.2502E-04 geom step: 1.6109E-02 full step:  
 1.6109E-02  
 molecular structure not yet converged...

center of mass moved by:  
 x: -2.2204E-16 y: -4.5103E-17 z: 3.8858E-16

new geometry:

|      | angstroms     |               |               |
|------|---------------|---------------|---------------|
| atom | x             | y             | z             |
| H25  | 0.8555223374  | -3.8227640767 | -2.4046995325 |
| C1   | 1.4725685271  | -2.9544279981 | -2.2896713992 |
| C2   | 3.1202875626  | -0.6757241476 | -2.0024873742 |
| C3   | 1.1332235179  | -1.9607952935 | -1.3810974147 |
| C4   | 2.6224126199  | -2.8020411585 | -3.0411027188 |
| C5   | 3.4382852005  | -1.6753333151 | -2.8987461469 |
| C6   | 1.9660662125  | -0.8393061929 | -1.2583918229 |
| C7   | 0.0218053265  | -1.7888470066 | -0.4408301930 |
| H27  | 2.8982826369  | -3.5593124566 | -3.7466707448 |
| H28  | 4.3248659475  | -1.5876874187 | -3.4956320456 |
| H30  | 3.7271094566  | 0.1942464605  | -1.8668588812 |
| C8   | 0.2169123338  | -0.6190509970 | 0.1796382645  |
| H32  | -0.7882154689 | -2.4648253014 | -0.2948299553 |
| C10  | -0.3879864380 | 0.2574462734  | 1.2504026541  |
| N2   | 1.3842689514  | -0.0256150694 | -0.3008840424 |
| C9   | 1.7114301812  | 1.1726199293  | 0.2856002846  |
| O1   | 2.7130074559  | 1.8121796824  | 0.0670110467  |
| H43  | -0.3289837254 | -0.2493767490 | 2.2052259629  |
| C12  | -1.8369200494 | 0.6211416416  | 0.9724405545  |
| C11  | 0.5723487481  | 1.5022238953  | 1.2619571889  |
| C18  | 1.1564316110  | 1.8364768966  | 2.6423611265  |
| H48  | 0.0475583017  | 2.3672795294  | 0.8751648452  |
| C13  | -3.5541281224 | 1.3923142268  | -0.5317836627 |
| C14  | -4.1043090262 | 0.8806431958  | 1.7413970867  |
| C15  | -4.4942542516 | 1.3094356575  | 0.4846050046  |
| C16  | -2.7816777193 | 0.5377903865  | 1.9813487049  |
| C17  | -2.2375733499 | 1.0495400981  | -0.2900489993 |
| H51  | -5.5160652179 | 1.5709524919  | 0.2935228498  |
| H52  | -2.4898962014 | 0.1975518210  | 2.9552491218  |
| H55  | -3.8497155602 | 1.7165752072  | -1.5110717918 |

```

H56      -4.8229340791      0.8075350102      2.5333922480
H59      -1.5224367068      1.0933357857      -1.0898237618
H60       1.6510487084      0.9684527349      3.0656676220
H61       0.3734592988      2.1561075790      3.3190664533
H62       1.8821427585      2.6340413444      2.5449099165

nuclear repulsion energy..... 1442.448526258 hartrees
-----
/  end of geometry optimization iteration  32  /
-----

end of program geopt

start of program onee
smallest eigenvalue of S:    1.212E-03
number of canonical orbitals.....      210
end of program onee

start of program probe
end of program probe

start of program grid

number of gridpoints:
  atom      H25      C1      C2      C3      C4      C5      C6      C7
grid # 1      73      89      87      90      87      87      85      85
grid # 2     106     100      97      98      98      99      91      92
grid # 3     224     183     183     194     182     182     187     182
grid # 4     224     379     381     406     379     379     372     376

number of gridpoints:
  atom      H27      H28      H30      C8      H32      C10      N2      C9
grid # 1      73      73      73      86      73      82      99      75
grid # 2     106     106     105      91     106      93     109      80
grid # 3     224     224     220     187     223     175     224     164
grid # 4     224     224     219     374     227     350     402     332

number of gridpoints:
  atom      O1      H43      C12      C11      C18      H48      C13      C14
grid # 1     111      69      90      81      72      69      88      87
grid # 2     123      96     105      93      75      99     100     100
grid # 3     272     210     193     174     142     216     183     183
grid # 4     475     201     400     358     307     208     379     379

number of gridpoints:
  atom      C15      C16      C17      H51      H52      H55      H56      H59
grid # 1      89      86      84      73      73      73      73      70
grid # 2     100     100      97     106     103     106     106     102
grid # 3     183     182     181     224     214     224     224     215
grid # 4     380     378     377     224     214     224     224     212

number of gridpoints:
  atom      H60      H61      H62      total
grid # 1      71      72      71     2819
grid # 2      99      99      99     3485
grid # 3     217     221     220     7036
grid # 4     218     222     221    10849

end of program grid

```

```

start of program rwr
recomputing RwR matrix 14    grid: 4
recomputing RwR matrix 15    grid: 4
end of program rwr

```

```

start of program scf

```

|      | i | u | d | i | g |                  | energy   | RMS     | maximum |
|------|---|---|---|---|---|------------------|----------|---------|---------|
|      | t | p | i | c | r |                  | change   | density | DIIS    |
|      | e | d | i | u | i |                  |          | change  | error   |
|      | r | t | s | t | d | total energy     |          |         |         |
| etot | 1 | N | N | 1 | U | -815.14171771491 |          | 1.9E-04 | 3.7E-03 |
| etot | 2 | Y | Y | 4 | M | -815.14276388742 | 1.0E-03  | 7.1E-05 | 1.0E-03 |
| etot | 3 | Y | Y | 4 | M | -815.14285022807 | 8.6E-05  | 2.7E-05 | 9.8E-04 |
| etot | 4 | Y | Y | 4 | M | -815.14286860293 | 1.8E-05  | 1.2E-05 | 1.9E-04 |
| etot | 5 | Y | Y | 4 | M | -815.14287259667 | 4.0E-06  | 3.9E-06 | 1.3E-04 |
| etot | 6 | N | N | 1 | U | -815.14286488410 | -7.7E-06 | 0.0E+00 | 0.0E+00 |

```

Energy components, in hartrees:

```

```

(A) Nuclear repulsion..... 1442.44852625766
(E) Total one-electron terms..... -3970.37931040962
(I) Total two-electron terms..... 1712.78791926786
(L) Electronic energy..... -2257.59139114176 (E+I)
(N) Total energy..... -815.14286488410 (A+L)

```

```

SCFE: SCF energy: HF      -815.14286488410 hartrees    iterations:    6

```

```

HOMO energy:      -0.29710
LUMO energy:       0.11904

```

```

Orbital energies:

```

|           |           |           |           |           |           |
|-----------|-----------|-----------|-----------|-----------|-----------|
| -20.45252 | -15.55208 | -11.32128 | -11.23553 | -11.22291 | -11.21402 |
| -11.20698 | -11.20126 | -11.18741 | -11.18656 | -11.18612 | -11.18569 |
| -11.18443 | -11.18414 | -11.17891 | -11.17716 | -11.17637 | -11.17563 |
| -11.17455 | -11.17235 | -1.42371  | -1.33307  | -1.18054  | -1.16259  |
| -1.11547  | -1.08827  | -1.04095  | -1.02788  | -1.02014  | -1.00070  |
| -0.94726  | -0.90589  | -0.85419  | -0.84408  | -0.83183  | -0.81070  |
| -0.79407  | -0.76168  | -0.72088  | -0.69242  | -0.67869  | -0.66900  |
| -0.65816  | -0.64050  | -0.64035  | -0.62704  | -0.61174  | -0.60603  |
| -0.60430  | -0.60175  | -0.59204  | -0.57835  | -0.55700  | -0.55540  |
| -0.53859  | -0.53200  | -0.51671  | -0.50762  | -0.49996  | -0.49656  |
| -0.49140  | -0.48617  | -0.45947  | -0.42220  | -0.39346  | -0.35006  |
| -0.34275  | -0.31511  | -0.29710  | 0.11904   | 0.13372   | 0.13888   |
| 0.14199   | 0.20555   | 0.22583   | 0.26438   | 0.27141   | 0.27429   |
| 0.29935   |           |           |           |           |           |

```

end of program scf

```

```

start of program derla
end of program derla

```

```

start of program rwr
recomputing RwR matrix 14    grid: 4
recomputing RwR matrix 15    grid: 4

```

end of program rwr

start of program derlb

forces (hartrees/bohr) : total

| atom  | label | x             | y             | z             |
|-------|-------|---------------|---------------|---------------|
| 1     | H25   | -1.514248E-04 | -2.792285E-04 | -1.722642E-04 |
| 2     | C1    | 8.114116E-04  | -1.792538E-04 | -5.124113E-04 |
| 3     | C2    | -1.160958E-03 | -1.963073E-05 | 1.176708E-03  |
| 4     | C3    | 7.736421E-06  | 3.513821E-05  | -6.788201E-05 |
| 5     | C4    | -6.192335E-04 | -4.547057E-05 | 4.047724E-04  |
| 6     | C5    | 3.142228E-06  | 1.805409E-04  | -9.969590E-06 |
| 7     | C6    | 2.668670E-04  | 2.799277E-04  | -3.137022E-04 |
| 8     | C7    | -7.989876E-04 | -7.239971E-04 | -1.416046E-03 |
| 9     | H27   | -3.818984E-06 | -4.106222E-04 | -2.312948E-04 |
| 10    | H28   | -5.215306E-04 | -1.062947E-04 | 4.067767E-04  |
| 11    | H30   | -7.198350E-05 | 3.738749E-04  | 1.208990E-04  |
| 12    | C8    | 4.983585E-04  | 4.886852E-04  | -3.967248E-04 |
| 13    | H32   | -1.501858E-04 | -4.929260E-04 | 6.146184E-05  |
| 14    | C10   | 2.590415E-04  | 7.768088E-04  | -6.937216E-04 |
| 15    | N2    | 1.540179E-03  | -4.335730E-05 | 5.675750E-04  |
| 16    | C9    | -4.104963E-04 | -2.386356E-04 | 1.098947E-04  |
| 17    | O1    | 9.583879E-04  | 8.626685E-04  | 2.098299E-04  |
| 18    | H43   | 4.349224E-04  | -7.872842E-05 | 4.003883E-04  |
| 19    | C12   | -2.233672E-04 | -2.629756E-04 | -1.426450E-03 |
| 20    | C11   | -1.088463E-04 | 6.489676E-04  | -5.115777E-04 |
| 21    | C18   | -2.801965E-04 | -4.864829E-04 | 1.220832E-04  |
| 22    | H48   | 4.947611E-04  | -6.672318E-04 | -3.842102E-04 |
| 23    | C13   | 3.370921E-04  | 1.537764E-04  | -1.951038E-04 |
| 24    | C14   | -6.420815E-04 | 4.742911E-04  | -8.389821E-04 |
| 25    | C15   | 4.585901E-04  | -3.678629E-04 | 1.650732E-03  |
| 26    | C16   | -6.957720E-04 | 5.334133E-04  | -8.414238E-04 |
| 27    | C17   | 1.225255E-03  | -3.667744E-04 | -4.652565E-04 |
| 28    | H51   | 1.637162E-04  | -6.781788E-05 | 4.554837E-04  |
| 29    | H52   | -7.514129E-05 | 1.208019E-05  | 7.341165E-04  |
| 30    | H55   | 4.039963E-04  | -2.859952E-04 | 8.685491E-04  |
| 31    | H56   | -1.875877E-04 | 6.387621E-05  | -1.793423E-04 |
| 32    | H59   | -3.289693E-04 | 4.734322E-05  | 1.287930E-03  |
| 33    | H60   | -5.163989E-05 | 8.198256E-04  | -1.509034E-04 |
| 34    | H61   | -1.368821E-04 | 4.083854E-06  | 1.069850E-04  |
| 35    | H62   | 1.461243E-04  | -3.926560E-04 | 1.329876E-04  |
| total |       | 1.390479E-03  | 2.393599E-04  | 9.907883E-06  |

end of program derlb

start of program geopt 33

geometry optimization step 33

reading input hessian of dimension 105  
in five columns format

reading input hessian of dimension 105  
in five columns format

\*\* restarting optimization from step 31 \*\*

Hessian eigenvalues:

|              |             |             |             |             |
|--------------|-------------|-------------|-------------|-------------|
| -4.20567E-01 | 0.00000E+00 | 0.00000E+00 | 0.00000E+00 | 0.00000E+00 |
| 0.00000E+00  | 0.00000E+00 | 0.00000E+00 | 0.00000E+00 | 0.00000E+00 |

|             |             |             |             |             |
|-------------|-------------|-------------|-------------|-------------|
| 0.00000E+00 | 0.00000E+00 | 0.00000E+00 | 0.00000E+00 | 0.00000E+00 |
| 0.00000E+00 | 0.00000E+00 | 0.00000E+00 | 0.00000E+00 | 0.00000E+00 |
| 0.00000E+00 | 0.00000E+00 | 0.00000E+00 | 0.00000E+00 | 0.00000E+00 |
| 0.00000E+00 | 0.00000E+00 | 5.00000E-04 | 5.15896E-03 | 1.73714E-02 |
| 2.28745E-02 | 2.76232E-02 | 2.83389E-02 | 3.07971E-02 | 3.08982E-02 |
| 3.18489E-02 | 3.27276E-02 | 3.59196E-02 | 3.78231E-02 | 4.60852E-02 |
| 5.33994E-02 | 6.32670E-02 | 6.66121E-02 | 6.95851E-02 | 7.28332E-02 |
| 7.42753E-02 | 7.97754E-02 | 8.86076E-02 | 9.60765E-02 | 1.00697E-01 |
| 1.07976E-01 | 1.13382E-01 | 1.16870E-01 | 1.27308E-01 | 1.38031E-01 |
| 1.42098E-01 | 1.42660E-01 | 1.44943E-01 | 1.46981E-01 | 1.58029E-01 |
| 1.62386E-01 | 1.65945E-01 | 1.69399E-01 | 1.77760E-01 | 1.80256E-01 |
| 1.86680E-01 | 1.90911E-01 | 1.94302E-01 | 2.06298E-01 | 2.07793E-01 |
| 2.14462E-01 | 2.20216E-01 | 2.25195E-01 | 2.33898E-01 | 2.39049E-01 |
| 2.46267E-01 | 2.50449E-01 | 2.57600E-01 | 2.59049E-01 | 2.63970E-01 |
| 2.82291E-01 | 2.91642E-01 | 2.96811E-01 | 3.06300E-01 | 3.08209E-01 |
| 3.15114E-01 | 3.16749E-01 | 3.24052E-01 | 3.28516E-01 | 3.31977E-01 |
| 3.36192E-01 | 3.43298E-01 | 3.53676E-01 | 3.56500E-01 | 3.63230E-01 |
| 3.65184E-01 | 3.72679E-01 | 3.79282E-01 | 3.84745E-01 | 3.93350E-01 |
| 4.01011E-01 | 4.05923E-01 | 4.23173E-01 | 4.28703E-01 | 4.35692E-01 |
| 4.52559E-01 | 4.65625E-01 | 4.76872E-01 | 4.83390E-01 | 4.88003E-01 |
| 4.92977E-01 | 5.06521E-01 | 5.11549E-01 | 5.30269E-01 | 5.50764E-01 |
| 5.64480E-01 | 5.75561E-01 | 6.32766E-01 | 6.53812E-01 | 7.14040E-01 |
| 7.29725E-01 | 7.59680E-01 | 9.07053E-01 | 9.29412E-01 | 1.09319E+00 |

WARNING: Hessian has wrong number of negative eigenvalues  
 WARNING: positive P-RFO shift not converged: using initial-guess shift

WARNING: failed to converge rfo shift adjustments

Level shifts adjusted to satisfy step-size constraints

Step size: 0.0278280  
 Cos(theta): 0.2148434

Final level shift: -4.2123425E-01

energy change: 4.5101E-05 \* ( 5.0000E-05 )  
 gradient maximum: 1.0424E-03 . ( 4.5000E-04 )  
 gradient rms: 2.3207E-04 \* ( 3.0000E-04 )  
 step size: 0.02783 trust radius: 0.01000  
 displacement maximum: 8.8118E-03 . ( 1.8000E-03 )  
 displacement rms: 2.4890E-03 . ( 1.2000E-03 )  
 predicted energy change: -1.7086E-04 geom step: 2.7828E-02 full step:  
 2.7828E-02  
 molecular structure not yet converged...

center of mass moved by:  
 x: 1.6653E-16 y: -4.5103E-17 z: 0.0000E+00

new geometry:

|      | angstroms    |               |               |
|------|--------------|---------------|---------------|
| atom | x            | y             | z             |
| H25  | 0.8685141544 | -3.8289165667 | -2.4082184296 |
| C1   | 1.4809823266 | -2.9581767422 | -2.2924207914 |
| C2   | 3.1192113762 | -0.6756177653 | -2.0038771824 |
| C3   | 1.1370150088 | -1.9651369511 | -1.3816091342 |
| C4   | 2.6284119557 | -2.8046223217 | -3.0444076913 |
| C5   | 3.4391519401 | -1.6757007337 | -2.9021888813 |
| C6   | 1.9672643619 | -0.8413135534 | -1.2579213881 |
| C7   | 0.0262997405 | -1.7938832886 | -0.4410117914 |
| H27  | 2.9048170441 | -3.5620912049 | -3.7493204350 |
| H28  | 4.3223618519 | -1.5854951586 | -3.5002364953 |
| H30  | 3.7211482302 | 0.1968374252  | -1.8685799831 |

|     |               |               |               |
|-----|---------------|---------------|---------------|
| C8  | 0.2177881805  | -0.6256393928 | 0.1804848490  |
| H32 | -0.7820123733 | -2.4710766049 | -0.2933962565 |
| C10 | -0.3904611920 | 0.2494673674  | 1.2510860510  |
| N2  | 1.3863128396  | -0.0309336857 | -0.2973480449 |
| C9  | 1.7095028677  | 1.1678195126  | 0.2894081603  |
| O1  | 2.7054807145  | 1.8188323576  | 0.0595335305  |
| H43 | -0.3305450747 | -0.2573200830 | 2.2057166365  |
| C12 | -1.8396196512 | 0.6145273814  | 0.9742277035  |
| C11 | 0.5683929977  | 1.4950838651  | 1.2615841520  |
| C18 | 1.1510021274  | 1.8421590327  | 2.6387556470  |
| H48 | 0.0405729108  | 2.3537857949  | 0.8722554159  |
| C13 | -3.5513233044 | 1.4009596405  | -0.5223571491 |
| C14 | -4.1068709799 | 0.8837794861  | 1.7412053592  |
| C15 | -4.4929365700 | 1.3189516911  | 0.4900901079  |
| C16 | -2.7852998058 | 0.5337019456  | 1.9797484974  |
| C17 | -2.2364580917 | 1.0496924037  | -0.2826553976 |
| H51 | -5.5120271351 | 1.5872303012  | 0.2976270400  |
| H52 | -2.4944232852 | 0.1923500374  | 2.9493822232  |
| H55 | -3.8436496568 | 1.7320303192  | -1.4980294532 |
| H56 | -4.8249489452 | 0.8107709707  | 2.5290120956  |
| H59 | -1.5191883775 | 1.0971121099  | -1.0781093210 |
| H60 | 1.6423876520  | 0.9795105613  | 3.0727747470  |
| H61 | 0.3641939947  | 2.1703429899  | 3.3074896957  |
| H62 | 1.8828939054  | 2.6337615645  | 2.5356362497  |

nuclear repulsion energy..... 1442.544030789 hartrees

-----  
 / end of geometry optimization iteration 33 /  
 -----

end of program geopt

start of program onee  
 smallest eigenvalue of S: 1.210E-03  
 number of canonical orbitals..... 210  
 end of program onee

start of program probe  
 end of program probe

start of program grid

number of gridpoints:

| atom     | H25 | C1  | C2  | C3  | C4  | C5  | C6  | C7  |
|----------|-----|-----|-----|-----|-----|-----|-----|-----|
| grid # 1 | 73  | 89  | 87  | 90  | 87  | 87  | 85  | 85  |
| grid # 2 | 106 | 99  | 97  | 98  | 98  | 98  | 91  | 92  |
| grid # 3 | 224 | 183 | 184 | 194 | 182 | 182 | 188 | 182 |
| grid # 4 | 224 | 379 | 380 | 408 | 379 | 379 | 374 | 376 |

number of gridpoints:

| atom     | H27 | H28 | H30 | C8  | H32 | C10 | N2  | C9  |
|----------|-----|-----|-----|-----|-----|-----|-----|-----|
| grid # 1 | 73  | 73  | 73  | 86  | 73  | 82  | 99  | 75  |
| grid # 2 | 106 | 106 | 105 | 91  | 106 | 93  | 109 | 80  |
| grid # 3 | 224 | 224 | 220 | 186 | 223 | 175 | 224 | 164 |
| grid # 4 | 224 | 224 | 219 | 376 | 227 | 349 | 402 | 333 |

number of gridpoints:

| atom     | O1  | H43 | C12 | C11 | C18 | H48 | C13 | C14 |
|----------|-----|-----|-----|-----|-----|-----|-----|-----|
| grid # 1 | 111 | 69  | 90  | 81  | 71  | 69  | 87  | 87  |



|          |     |     |     |     |     |     |     |     |
|----------|-----|-----|-----|-----|-----|-----|-----|-----|
| grid # 2 | 127 | 96  | 105 | 93  | 76  | 99  | 100 | 98  |
| grid # 3 | 272 | 209 | 192 | 173 | 149 | 216 | 183 | 183 |
| grid # 4 | 475 | 201 | 400 | 356 | 305 | 208 | 378 | 376 |

number of gridpoints:

|          |     |     |     |     |     |     |     |     |
|----------|-----|-----|-----|-----|-----|-----|-----|-----|
| atom     | C15 | C16 | C17 | H51 | H52 | H55 | H56 | H59 |
| grid # 1 | 87  | 85  | 84  | 73  | 73  | 73  | 73  | 70  |
| grid # 2 | 100 | 100 | 97  | 106 | 103 | 106 | 106 | 102 |
| grid # 3 | 183 | 182 | 181 | 224 | 214 | 224 | 224 | 215 |
| grid # 4 | 379 | 375 | 376 | 224 | 214 | 224 | 224 | 211 |

number of gridpoints:

|          |     |     |     |       |
|----------|-----|-----|-----|-------|
| atom     | H60 | H61 | H62 | total |
| grid # 1 | 71  | 72  | 72  | 2815  |
| grid # 2 | 99  | 99  | 99  | 3486  |
| grid # 3 | 217 | 221 | 220 | 7041  |
| grid # 4 | 218 | 222 | 221 | 10840 |

end of program grid

start of program rwr

recomputing Rwr matrix 15 grid: 4

end of program rwr

start of program scf

|      |   |   |   |   |   |                  |               |         |
|------|---|---|---|---|---|------------------|---------------|---------|
|      | i | u | d | i | g |                  |               |         |
|      | t | p | i | c | r |                  | RMS           | maximum |
|      | e | d | i | u | i |                  | density       | DIIS    |
|      | r | t | s | t | d | total energy     | energy change | error   |
| etot | 1 | N | N | 1 | U | -815.14240442792 | 1.1E-04       | 2.7E-03 |
| etot | 2 | Y | Y | 4 | M | -815.14272628312 | 3.2E-04       | 3.5E-05 |
| etot | 3 | Y | Y | 4 | M | -815.14276073817 | 3.4E-05       | 1.3E-05 |
| etot | 4 | Y | Y | 4 | M | -815.14276320490 | 2.5E-06       | 5.8E-06 |
| etot | 5 | Y | Y | 4 | M | -815.14276314733 | -5.8E-08      | 1.9E-06 |
| etot | 6 | N | N | 1 | U | -815.14276354093 | 3.9E-07       | 0.0E+00 |

Energy components, in hartrees:

|     |                               |                   |       |
|-----|-------------------------------|-------------------|-------|
| (A) | Nuclear repulsion.....        | 1442.54403078922  |       |
| (E) | Total one-electron terms..... | -3970.55663474941 |       |
| (I) | Total two-electron terms..... | 1712.86984041926  |       |
| (L) | Electronic energy.....        | -2257.68679433015 | (E+I) |
| (N) | Total energy.....             | -815.14276354093  | (A+L) |

SCFE: SCF energy: HF -815.14276354093 hartrees iterations: 6

HOMO energy: -0.29713

LUMO energy: 0.11856

Orbital energies:

|           |           |           |           |           |           |
|-----------|-----------|-----------|-----------|-----------|-----------|
| -20.45199 | -15.55227 | -11.32129 | -11.23550 | -11.22299 | -11.21425 |
| -11.20666 | -11.20059 | -11.18782 | -11.18586 | -11.18539 | -11.18505 |
| -11.18372 | -11.18340 | -11.17901 | -11.17720 | -11.17648 | -11.17562 |
| -11.17437 | -11.17225 | -1.42129  | -1.33272  | -1.18156  | -1.16292  |
| -1.11596  | -1.08863  | -1.04182  | -1.02807  | -1.02070  | -1.00093  |
| -0.94785  | -0.90616  | -0.85439  | -0.84528  | -0.83217  | -0.81120  |
| -0.79434  | -0.76176  | -0.72191  | -0.69271  | -0.67895  | -0.66934  |

```

-0.65826  -0.64100  -0.64058  -0.62726  -0.61187  -0.60527
-0.60436  -0.60198  -0.59246  -0.57857  -0.55732  -0.55503
-0.53927  -0.53198  -0.51693  -0.50792  -0.50031  -0.49652
-0.49146  -0.48656  -0.45909  -0.42231  -0.39340  -0.34978
-0.34385  -0.31564  -0.29713   0.11856   0.13429   0.13864
 0.14208   0.20535   0.22578   0.26491   0.27156   0.27464
 0.29987

```

end of program scf

start of program derla  
end of program derla

start of program rwr  
recomputing RwR matrix 15      grid: 4  
end of program rwr

start of program derlb

forces (hartrees/bohr) : total

| atom | label | x             | y             | z             |
|------|-------|---------------|---------------|---------------|
| 1    | H25   | -7.730016E-04 | -5.124978E-04 | 5.473418E-05  |
| 2    | C1    | -1.289582E-03 | 3.647156E-04  | 1.437368E-03  |
| 3    | C2    | -8.429366E-04 | -1.370869E-03 | -8.462852E-05 |
| 4    | C3    | 1.109121E-03  | -4.210770E-04 | -1.221547E-03 |
| 5    | C4    | -4.605337E-04 | 6.100920E-04  | 6.622196E-04  |
| 6    | C5    | -4.414109E-04 | 2.061370E-03  | 1.488608E-03  |
| 7    | C6    | 2.760964E-04  | -8.615921E-04 | -4.590633E-04 |
| 8    | C7    | -1.801301E-03 | -2.607574E-03 | -1.808522E-03 |
| 9    | H27   | 1.427103E-04  | -3.375529E-04 | -3.323421E-04 |
| 10   | H28   | 8.137571E-04  | 2.982234E-04  | -2.407148E-04 |
| 11   | H30   | 6.518773E-04  | 6.959804E-04  | -8.460174E-05 |
| 12   | C8    | 9.057729E-04  | 1.545103E-03  | 3.170024E-04  |
| 13   | H32   | -4.209968E-04 | -6.950629E-04 | -1.287361E-04 |
| 14   | C10   | 8.703350E-04  | 3.754785E-04  | -4.043090E-05 |
| 15   | N2    | 1.324029E-03  | 3.389700E-04  | 6.881740E-04  |
| 16   | C9    | 3.094736E-03  | 3.548460E-03  | -4.037896E-03 |
| 17   | O1    | -3.372225E-03 | -3.026781E-03 | 2.245705E-03  |
| 18   | H43   | 4.152405E-04  | -1.564509E-04 | 5.364890E-04  |
| 19   | C12   | 1.758741E-03  | -6.609335E-04 | -9.649744E-05 |
| 20   | C11   | 1.145875E-03  | -5.236223E-05 | 3.904124E-04  |
| 21   | C18   | -1.117114E-03 | -2.237456E-04 | 7.026597E-04  |
| 22   | H48   | 2.694897E-05  | 1.022595E-03  | -1.385353E-03 |
| 23   | C13   | 1.761017E-03  | 1.319712E-04  | -1.553878E-03 |
| 24   | C14   | 2.031517E-03  | -6.521927E-04 | 8.042769E-04  |
| 25   | C15   | -4.539852E-04 | 3.293806E-04  | -4.863020E-04 |
| 26   | C16   | -2.014838E-03 | 7.710041E-04  | -8.060916E-04 |
| 27   | C17   | -3.748306E-04 | 8.415705E-04  | -2.559436E-03 |
| 28   | H51   | -3.424461E-04 | 2.881254E-05  | 4.276512E-04  |
| 29   | H52   | 2.690992E-04  | -1.035979E-03 | 3.514058E-03  |
| 30   | H55   | 8.535088E-05  | 1.806752E-04  | -7.219892E-04 |
| 31   | H56   | -1.614602E-03 | -1.735350E-04 | 2.113054E-03  |
| 32   | H59   | 2.415843E-05  | 3.919954E-05  | -1.083514E-04 |
| 33   | H60   | 2.422856E-05  | -3.616377E-04 | 2.920942E-04  |
| 34   | H61   | 6.290094E-04  | 2.287964E-04  | 3.907289E-04  |
| 35   | H62   | -6.653468E-04 | 8.093501E-07  | -1.171101E-04 |

```

total          1.374472E-03    2.633645E-04   -2.082536E-04

end of program derlb

start of program geopt  34

geometry optimization step 34
** stopping now - optimization seems to be stuck **

*****
**                Geometry optimization complete                **
*****

center of mass moved by:
      x:      0.0000E+00      y:      0.0000E+00      z:      0.0000E+00

final geometry:

                                angstroms
atom          x              y              z
H25          0.8685141544     -3.8289165667     -2.4082184296
C1           1.4809823266     -2.9581767422     -2.2924207914
C2           3.1192113762     -0.6756177653     -2.0038771824
C3           1.1370150088     -1.9651369511     -1.3816091342
C4           2.6284119557     -2.8046223217     -3.0444076913
C5           3.4391519401     -1.6757007337     -2.9021888813
C6           1.9672643619     -0.8413135534     -1.2579213881
C7           0.0262997405     -1.7938832886     -0.4410117914
H27          2.9048170441     -3.5620912049     -3.7493204350
H28          4.3223618519     -1.5854951586     -3.5002364953
H30          3.7211482302      0.1968374252     -1.8685799831
C8           0.2177881805     -0.6256393928      0.1804848490
H32          -0.7820123733     -2.4710766049     -0.2933962565
C10          -0.3904611920      0.2494673674      1.2510860510
N2           1.3863128396     -0.0309336857     -0.2973480449
C9           1.7095028677      1.1678195126      0.2894081603
O1           2.7054807145      1.8188323576      0.0595335305
H43          -0.3305450747     -0.2573200830      2.2057166365
C12          -1.8396196512      0.6145273814      0.9742277035
C11          0.5683929977      1.4950838651      1.2615841520
C18          1.1510021274      1.8421590327      2.6387556470
H48          0.0405729108      2.3537857949      0.8722554159
C13          -3.5513233044      1.4009596405     -0.5223571491
C14          -4.1068709799      0.8837794861      1.7412053592
C15          -4.4929365700      1.3189516911      0.4900901079
C16          -2.7852998058      0.5337019456      1.9797484974
C17          -2.2364580917      1.0496924037     -0.2826553976
H51          -5.5120271351      1.5872303012      0.2976270400
H52          -2.4944232852      0.1923500374      2.9493822232
H55          -3.8436496568      1.7320303192     -1.4980294532
H56          -4.8249489452      0.8107709707      2.5290120956
H59          -1.5191883775      1.0971121099     -1.0781093210
H60          1.6423876520      0.9795105613      3.0727747470
H61          0.3641939947      2.1703429899      3.3074896957
H62          1.8828939054      2.6337615645      2.5356362497

nuclear repulsion energy..... 1442.544030789 hartrees
-----
/  end of geometry optimization iteration  34  /
-----

```

end of program geopt

start of program post

Writing a SPARTAN archive file

end of program post

|                   |       |          |           |          |
|-------------------|-------|----------|-----------|----------|
| Total cpu seconds | user: | 2188.203 | user+sys: | 2188.203 |
|-------------------|-------|----------|-----------|----------|

Stereoisomer cis **5'a**

```
+-----+
| Jaguar version 3.5, release 42 |
|                               |
| Copyright 1991-1998 Schrodinger, Inc. |
| All Rights Reserved. |
|                               |
| Use of this program should be acknowledged in publications as: |
| Jaguar 3.5, Schrodinger, Inc., Portland, Oregon, 1998. |
+-----+
```

start of program pre

Job name: WF29705

Executables used: C:\USERS\GIANCARLO\DOCUMENTS\1.

Temporary files : LAVORO\C.

Input file comments:

Molecule001

This file created by Spartan

basis set: 3-21g\*

net molecular charge: 0

multiplicity: 1

number of basis functions.... 210

Input geometry:

|      | angstroms     |               |               |
|------|---------------|---------------|---------------|
| atom | x             | y             | z             |
| H25  | 0.6886900000  | 2.3544670000  | -3.9937660000 |
| C1   | 1.3750520000  | 2.2734170000  | -3.1390250000 |
| C2   | 3.1750530000  | 2.0861580000  | -0.9285270000 |
| C3   | 1.1383800000  | 1.3403620000  | -2.1349640000 |
| C4   | 2.4920260000  | 3.0976570000  | -3.0405700000 |
| C5   | 3.3742850000  | 3.0037670000  | -1.9550370000 |
| C6   | 2.0557450000  | 1.2524780000  | -1.0164380000 |
| C7   | 0.0957650000  | 0.3425340000  | -1.9264760000 |
| H27  | 2.6898920000  | 3.8389280000  | -3.8289430000 |
| H28  | 4.2474270000  | 3.6727650000  | -1.9132950000 |
| H30  | 3.8681870000  | 2.0136070000  | -0.0784040000 |
| C8   | 0.3831890000  | -0.2976200000 | -0.7409320000 |
| H32  | -0.7409340000 | 0.1600350000  | -2.5950360000 |
| C10  | -0.1361960000 | -1.4227000000 | 0.1031630000  |
| N2   | 1.5769130000  | 0.2513240000  | -0.1637720000 |
| C9   | 1.9474810000  | -0.4225660000 | 1.0095210000  |
| O1   | 2.9471210000  | -0.1768780000 | 1.6869020000  |
| H43  | -0.0649790000 | -2.3743750000 | -0.4983350000 |
| C12  | -1.5497210000 | -1.2402180000 | 0.5399010000  |
| C11  | 0.8902860000  | -1.5130810000 | 1.2775300000  |
| C19  | 0.2982570000  | -1.3342840000 | 2.6500090000  |
| C13  | -3.7119580000 | -2.2138530000 | 1.0439530000  |
| C14  | -3.3957740000 | 0.1717130000  | 1.2257040000  |
| C15  | -4.2202500000 | -0.9479390000 | 1.3340210000  |
| C16  | -2.0666360000 | 0.0279860000  | 0.8307490000  |
| C17  | -2.3841030000 | -2.3609000000 | 0.6471610000  |
| H49  | -4.3596040000 | -3.0991830000 | 1.1256260000  |
| H50  | -3.7933710000 | 1.1725120000  | 1.4504100000  |
| H51  | -5.2688150000 | -0.8329270000 | 1.6450770000  |
| H52  | -1.4200870000 | 0.9147090000  | 0.7388970000  |
| H53  | -1.9911600000 | -3.3622750000 | 0.4156240000  |
| H1   | 1.1120370000  | -1.3363630000 | 3.4165330000  |
| H2   | -0.4122190000 | -2.1680220000 | 2.8690440000  |

|    |               |               |              |
|----|---------------|---------------|--------------|
| H3 | -0.2595340000 | -0.3685300000 | 2.7224590000 |
| H4 | 1.4195540000  | -2.5027080000 | 1.2212370000 |

Molecular weight: 261.12 amu

Stoichiometry: C18NH15O

Molecular Point Group: C1

Point Group used: C1

nuclear repulsion energy..... 1440.472808068 hartrees

Non-default options chosen:

Geometry will be optimized in redundant internal coordinates

Initial Hessian: from previous calculation

end of program pre

start of program onee

smallest eigenvalue of S: 1.347E-03

number of canonical orbitals..... 210

end of program onee

start of program hfig

initial wavefunction generated automatically from atomic wavefunctions

| Irreducible representation | Total no orbitals | No of occupied orbitals | Shell_1 | Shell_2 | ... |
|----------------------------|-------------------|-------------------------|---------|---------|-----|
| No Symm                    | 210               | 69                      |         |         |     |

-----  
Orbital occupation/shell 1.000

end of program hfig

start of program probe

end of program probe

start of program grid

number of gridpoints:

| atom     | H25 | C1  | C2  | C3  | C4  | C5  | C6  | C7  |
|----------|-----|-----|-----|-----|-----|-----|-----|-----|
| grid # 1 | 73  | 89  | 89  | 91  | 87  | 86  | 85  | 85  |
| grid # 2 | 106 | 100 | 100 | 96  | 100 | 100 | 93  | 92  |
| grid # 3 | 224 | 184 | 185 | 196 | 183 | 184 | 196 | 185 |
| grid # 4 | 227 | 380 | 384 | 411 | 380 | 380 | 383 | 384 |

number of gridpoints:

| atom     | H27 | H28 | H30 | C8  | H32 | C10 | N2  | C9  |
|----------|-----|-----|-----|-----|-----|-----|-----|-----|
| grid # 1 | 73  | 73  | 73  | 87  | 73  | 81  | 99  | 82  |
| grid # 2 | 106 | 106 | 106 | 90  | 105 | 88  | 108 | 82  |
| grid # 3 | 224 | 224 | 220 | 189 | 223 | 171 | 225 | 169 |
| grid # 4 | 228 | 228 | 223 | 380 | 230 | 350 | 410 | 339 |

number of gridpoints:

| atom     | O1  | H43 | C12 | C11 | C19 | C13 | C14 | C15 |
|----------|-----|-----|-----|-----|-----|-----|-----|-----|
| grid # 1 | 111 | 71  | 90  | 82  | 73  | 89  | 89  | 89  |
| grid # 2 | 127 | 100 | 106 | 93  | 77  | 99  | 99  | 100 |
| grid # 3 | 274 | 211 | 192 | 175 | 148 | 184 | 184 | 185 |
| grid # 4 | 478 | 207 | 401 | 352 | 322 | 379 | 378 | 379 |

number of gridpoints:

|          |     |     |     |     |     |     |     |     |
|----------|-----|-----|-----|-----|-----|-----|-----|-----|
| atom     | C16 | C17 | H49 | H50 | H51 | H52 | H53 | H1  |
| grid # 1 | 86  | 88  | 73  | 73  | 73  | 69  | 71  | 72  |
| grid # 2 | 98  | 99  | 106 | 106 | 106 | 102 | 104 | 99  |
| grid # 3 | 181 | 183 | 224 | 224 | 224 | 212 | 216 | 220 |
| grid # 4 | 379 | 378 | 228 | 227 | 228 | 214 | 219 | 225 |

number of gridpoints:

|          |     |     |     |       |
|----------|-----|-----|-----|-------|
| atom     | H2  | H3  | H4  | total |
| grid # 1 | 71  | 70  | 71  | 2837  |
| grid # 2 | 99  | 96  | 100 | 3494  |
| grid # 3 | 218 | 214 | 218 | 7069  |
| grid # 4 | 219 | 216 | 213 | 10959 |

end of program grid

start of program rwr

recomputing RwR matrix 15 grid: 4

end of program rwr

start of program scf

|                               |     |
|-------------------------------|-----|
| number of electrons.....      | 138 |
| number of alpha electrons.... | 69  |
| number of beta electrons..... | 69  |
| number of orbitals, total.... | 210 |
| number of core orbitals.....  | 69  |
| number of open shell orbs.... | 0   |
| number of occupied orbitals.. | 69  |
| number of virtual orbitals... | 141 |
| number of hamiltonians.....   | 1   |
| number of shells.....         | 1   |

SCF type: HF

|      | i  | u | d | i | g |                  |          | RMS     | maximum |
|------|----|---|---|---|---|------------------|----------|---------|---------|
|      | t  | p | i | c | r |                  |          | density | DIIS    |
|      | e  | d | i | u | i |                  | energy   | change  | error   |
|      | r  | t | s | t | d | total energy     | change   |         |         |
| etot | 1  | N | N | 5 | M | -812.78268348650 |          | 3.8E-02 | 1.4E-01 |
| etot | 2  | Y | Y | 6 | M | -814.79138137081 | 2.0E+00  | 6.2E-03 | 1.1E-01 |
| etot | 3  | Y | Y | 6 | M | -815.04716877384 | 2.6E-01  | 1.0E-02 | 5.3E-02 |
| etot | 4  | N | Y | 2 | U | -814.82979416740 | -2.2E-01 | 1.4E-02 | 1.4E-01 |
| etot | 5  | N | Y | 2 | U | -814.92391575147 | 9.4E-02  | 2.1E-02 | 1.1E-01 |
| etot | 6  | Y | Y | 6 | M | -815.05560708398 | 1.3E-01  | 8.3E-03 | 6.7E-02 |
| etot | 7  | N | Y | 2 | U | -815.10629835254 | 5.1E-02  | 3.4E-03 | 3.1E-02 |
| etot | 8  | Y | Y | 6 | M | -815.11687634204 | 1.1E-02  | 1.4E-03 | 8.8E-03 |
| etot | 9  | N | Y | 2 | U | -815.11876800244 | 1.9E-03  | 1.5E-04 | 2.5E-03 |
| etot | 10 | Y | Y | 6 | M | -815.11892424704 | 1.6E-04  | 1.2E-04 | 1.4E-03 |
| etot | 11 | Y | Y | 6 | M | -815.11899599696 | 7.2E-05  | 5.4E-05 | 3.9E-04 |
| etot | 12 | Y | Y | 6 | M | -815.11902866522 | 3.3E-05  | 7.2E-06 | 8.3E-05 |
| etot | 13 | Y | Y | 6 | M | -815.11902706488 | -1.6E-06 | 3.1E-06 | 3.5E-05 |
| etot | 14 | N | N | 2 | U | -815.11889544947 | -1.3E-04 | 0.0E+00 | 0.0E+00 |

Energy components, in hartrees:

|     |                               |                   |       |
|-----|-------------------------------|-------------------|-------|
| (A) | Nuclear repulsion.....        | 1440.47280806809  |       |
| (E) | Total one-electron terms..... | -3966.66504906832 |       |
| (I) | Total two-electron terms..... | 1711.07334555075  |       |
| (L) | Electronic energy.....        | -2255.59170351756 | (E+I) |
| (N) | Total energy.....             | -815.11889544947  | (A+L) |

SCFE: SCF energy: HF -815.11889544947 hartrees iterations: 14

HOMO energy: -0.29298  
LUMO energy: 0.11127

Orbital energies:

|           |           |           |           |           |           |
|-----------|-----------|-----------|-----------|-----------|-----------|
| -20.45306 | -15.55949 | -11.32866 | -11.24422 | -11.23573 | -11.21699 |
| -11.21406 | -11.20362 | -11.19611 | -11.19433 | -11.19377 | -11.19309 |
| -11.19166 | -11.19114 | -11.18700 | -11.18641 | -11.18586 | -11.18257 |
| -11.17972 | -11.17707 | -1.40470  | -1.31339  | -1.17846  | -1.15442  |
| -1.11573  | -1.07956  | -1.03706  | -1.02388  | -1.01487  | -0.99554  |
| -0.94221  | -0.90070  | -0.84708  | -0.83850  | -0.82642  | -0.80022  |
| -0.77997  | -0.75564  | -0.71186  | -0.68097  | -0.67852  | -0.66623  |
| -0.65399  | -0.63994  | -0.63075  | -0.61940  | -0.60945  | -0.60171  |
| -0.59658  | -0.59512  | -0.58645  | -0.57797  | -0.55614  | -0.54311  |
| -0.52339  | -0.51844  | -0.51208  | -0.50894  | -0.49547  | -0.49384  |
| -0.48760  | -0.48203  | -0.45234  | -0.42182  | -0.39553  | -0.34941  |
| -0.34169  | -0.31254  | -0.29298  | 0.11127   | 0.12947   | 0.13244   |
| 0.13351   | 0.20008   | 0.20866   | 0.25301   | 0.26027   | 0.26847   |
| 0.29523   |           |           |           |           |           |

end of program scf

start of program derla  
end of program derla

start of program rwr  
recomputing Rwr matrix 15 grid: 4  
end of program rwr

start of program derlb

forces (hartrees/bohr) : total

| atom | label | x             | y             | z             |
|------|-------|---------------|---------------|---------------|
| 1    | H25   | 1.222434E-02  | -1.130955E-03 | 1.475894E-02  |
| 2    | C1    | -3.862275E-03 | 2.737511E-03  | -7.805375E-03 |
| 3    | C2    | 2.504355E-05  | -5.982400E-03 | 8.093392E-03  |
| 4    | C3    | 1.824739E-02  | -2.839439E-03 | 2.442479E-02  |
| 5    | C4    | 5.932779E-04  | 7.123474E-03  | -9.049019E-03 |
| 6    | C5    | 9.754677E-03  | 6.434136E-03  | 1.629568E-03  |
| 7    | C6    | -2.075858E-03 | 9.178370E-03  | -1.195066E-02 |
| 8    | C7    | 2.814102E-03  | -1.688764E-02 | 2.728656E-02  |
| 9    | H27   | -3.601753E-03 | -1.344203E-02 | 1.429580E-02  |
| 10   | H28   | -1.618132E-02 | -1.246861E-02 | -6.839243E-04 |
| 11   | H30   | -1.422930E-02 | -2.330306E-05 | -1.529101E-02 |
| 12   | C8    | 1.113915E-02  | 2.840004E-02  | -2.792182E-02 |
| 13   | H32   | 1.100067E-02  | 5.734086E-04  | 1.135553E-02  |
| 14   | C10   | 1.100992E-02  | -2.716938E-02 | -2.172544E-02 |
| 15   | N2    | -2.642436E-02 | -1.787194E-02 | -1.339288E-02 |
| 16   | C9    | 3.756980E-02  | 1.780946E-02  | 9.691310E-03  |
| 17   | O1    | -3.642113E-02 | -6.246066E-03 | -2.360412E-02 |
| 18   | H43   | -2.726170E-03 | 2.319800E-02  | 1.412277E-02  |
| 19   | C12   | -2.503282E-02 | 5.942381E-04  | 6.987730E-04  |
| 20   | C11   | 2.291762E-02  | -1.625845E-02 | -1.382487E-02 |
| 21   | C19   | -1.122013E-02 | 3.781163E-03  | 3.485740E-02  |



|       |       |               |               |               |
|-------|-------|---------------|---------------|---------------|
| 22    | C13   | -6.222051E-03 | -7.340124E-03 | 1.835546E-03  |
| 23    | C14   | -2.100249E-03 | 8.017839E-03  | 2.423074E-03  |
| 24    | C15   | -9.018741E-03 | 9.260244E-05  | 2.603245E-03  |
| 25    | C16   | 2.484457E-03  | 5.593248E-03  | -1.759100E-04 |
| 26    | C17   | 1.658169E-03  | -2.011237E-03 | -3.138985E-04 |
| 27    | H49   | 1.147389E-02  | 1.599304E-02  | -1.585371E-03 |
| 28    | H50   | 7.181397E-03  | -1.816341E-02 | -4.054648E-03 |
| 29    | H51   | 1.885804E-02  | -2.067966E-03 | -5.807676E-03 |
| 30    | H52   | -1.279500E-02 | -1.700501E-02 | 6.616159E-04  |
| 31    | H53   | -6.624328E-03 | 1.771002E-02  | 3.386624E-03  |
| 32    | H1    | -1.668550E-02 | -1.218845E-04 | -1.565712E-02 |
| 33    | H2    | 1.418806E-02  | 1.879594E-02  | -1.788669E-03 |
| 34    | H3    | 1.210608E-02  | -2.195092E-02 | 7.916222E-04  |
| 35    | H4    | -1.004245E-02 | 2.361926E-02  | 2.461792E-03  |
| ----- |       |               |               |               |
|       | total | -1.734733E-05 | 6.709873E-04  | 7.459507E-04  |

end of program derlb

start of program geopt 1

geometry optimization step 1  
reading input hessian of dimension 105  
in five columns format

Level shifts adjusted to satisfy step-size constraints

Step size: 0.3002118

Cos(theta): 0.8389975

Final level shift: -5.2179595E-02

gradient maximum: 4.3794E-02 . ( 4.5000E-04 )

gradient rms: 1.2223E-02 . ( 3.0000E-04 )

step size: 0.30021 trust radius: 0.30000

displacement maximum: 8.3134E-02 . ( 1.8000E-03 )

displacement rms: 2.6852E-02 . ( 1.2000E-03 )

predicted energy change: -1.9562E-02 geom step: 3.0021E-01 full step:  
3.0021E-01

molecular structure not yet converged...

center of mass moved by:

x: -1.5964E-02 y: 3.1437E-03 z: -1.5951E-02

new geometry:

|      | angstroms     |               |               |
|------|---------------|---------------|---------------|
| atom | x             | y             | z             |
| H25  | 0.7398635828  | 2.3367211526  | -3.9707796120 |
| C1   | 1.3970254542  | 2.2609998714  | -3.1233397783 |
| C2   | 3.1709742893  | 2.0580296859  | -0.8990496105 |
| C3   | 1.1577112601  | 1.3275223397  | -2.1201753592 |
| C4   | 2.5073978646  | 3.0810069952  | -3.0137823157 |
| C5   | 3.3866487924  | 2.9800275972  | -1.9156684517 |
| C6   | 2.0540438730  | 1.2437912485  | -1.0200550701 |
| C7   | 0.1099068234  | 0.3246151920  | -1.9226775600 |
| H27  | 2.7082674462  | 3.8072463629  | -3.7805661819 |
| H28  | 4.2315797784  | 3.6402143553  | -1.8577954237 |
| H30  | 3.8181514571  | 1.9754010688  | -0.0481640993 |
| C8   | 0.3794964387  | -0.2997446904 | -0.7654776965 |
| H32  | -0.7048999624 | 0.1355785631  | -2.5857085597 |
| C10  | -0.1452156126 | -1.4251614525 | 0.0944573269  |

|     |               |               |               |
|-----|---------------|---------------|---------------|
| N2  | 1.5559400303  | 0.2349014172  | -0.2012571471 |
| C9  | 1.9480381272  | -0.3850638524 | 0.9820617363  |
| O1  | 2.9233635939  | -0.1035785071 | 1.6405677795  |
| H43 | -0.0856436979 | -2.3554720229 | -0.4606881258 |
| C12 | -1.5805958252 | -1.2454924987 | 0.5312993868  |
| C11 | 0.9066836483  | -1.4865678440 | 1.2716609096  |
| C19 | 0.3834741654  | -1.3140966297 | 2.6981957081  |
| C13 | -3.7271863089 | -2.2203706947 | 1.0329615607  |
| C14 | -3.4137964209 | 0.1638916814  | 1.2324837756  |
| C15 | -4.2343853551 | -0.9542946417 | 1.3357872613  |
| C16 | -2.1001085773 | 0.0178182649  | 0.8299138102  |
| C17 | -2.4091543907 | -2.3591848007 | 0.6315497115  |
| H49 | -4.3642165665 | -3.0852147864 | 1.1000203386  |
| H50 | -3.7944386113 | 1.1411778907  | 1.4659213387  |
| H51 | -5.2578097521 | -0.8427607631 | 1.6441330522  |
| H52 | -1.4701816191 | 0.8867454110  | 0.7444147448  |
| H53 | -2.0285817643 | -3.3352537171 | 0.3855835579  |
| H1  | 1.2237931433  | -1.3765631446 | 3.3738415393  |
| H2  | -0.3342642682 | -2.0942130342 | 2.9351286210  |
| H3  | -0.0993880779 | -0.3663307952 | 2.8439572923  |
| H4  | 1.4431813633  | -2.4245539315 | 1.2066820334  |

nuclear repulsion energy..... 1445.086679319 hartrees

/ end of geometry optimization iteration 1 /

end of program geopt

start of program onee  
smallest eigenvalue of S: 1.280E-03  
number of canonical orbitals..... 210  
end of program onee

start of program probe  
end of program probe

start of program grid

number of gridpoints:

| atom     | H25 | C1  | C2  | C3  | C4  | C5  | C6  | C7  |
|----------|-----|-----|-----|-----|-----|-----|-----|-----|
| grid # 1 | 73  | 89  | 89  | 91  | 87  | 87  | 84  | 85  |
| grid # 2 | 106 | 100 | 100 | 99  | 99  | 99  | 91  | 92  |
| grid # 3 | 224 | 183 | 183 | 194 | 183 | 185 | 192 | 182 |
| grid # 4 | 224 | 382 | 385 | 403 | 379 | 382 | 377 | 379 |

number of gridpoints:

| atom     | H27 | H28 | H30 | C8  | H32 | C10 | N2  | C9  |
|----------|-----|-----|-----|-----|-----|-----|-----|-----|
| grid # 1 | 73  | 73  | 73  | 86  | 73  | 83  | 99  | 80  |
| grid # 2 | 106 | 106 | 105 | 91  | 105 | 91  | 108 | 81  |
| grid # 3 | 224 | 224 | 220 | 183 | 223 | 173 | 224 | 168 |
| grid # 4 | 224 | 224 | 219 | 379 | 228 | 352 | 407 | 333 |

number of gridpoints:

| atom     | O1  | H43 | C12 | C11 | C19 | C13 | C14 | C15 |
|----------|-----|-----|-----|-----|-----|-----|-----|-----|
| grid # 1 | 111 | 69  | 90  | 81  | 72  | 88  | 89  | 89  |
| grid # 2 | 127 | 98  | 105 | 92  | 74  | 99  | 100 | 100 |
| grid # 3 | 274 | 211 | 192 | 173 | 145 | 182 | 182 | 184 |
| grid # 4 | 475 | 206 | 398 | 356 | 302 | 380 | 379 | 379 |

number of gridpoints:

|          |     |     |     |     |     |     |     |     |
|----------|-----|-----|-----|-----|-----|-----|-----|-----|
| atom     | C16 | C17 | H49 | H50 | H51 | H52 | H53 | H1  |
| grid # 1 | 85  | 86  | 73  | 73  | 73  | 70  | 71  | 71  |
| grid # 2 | 97  | 99  | 106 | 106 | 106 | 101 | 103 | 96  |
| grid # 3 | 181 | 183 | 224 | 224 | 224 | 214 | 216 | 220 |
| grid # 4 | 380 | 378 | 224 | 223 | 224 | 211 | 215 | 219 |

number of gridpoints:

|          |     |     |     |       |
|----------|-----|-----|-----|-------|
| atom     | H2  | H3  | H4  | total |
| grid # 1 | 71  | 71  | 69  | 2827  |
| grid # 2 | 97  | 98  | 99  | 3482  |
| grid # 3 | 219 | 217 | 218 | 7048  |
| grid # 4 | 216 | 213 | 211 | 10866 |

end of program grid

start of program rwr

recomputing RWR matrix 4 grid: 4

recomputing RWR matrix 15 grid: 4

end of program rwr

start of program scf

|      | i | u | d | i | g |                  |          | RMS     | maximum |
|------|---|---|---|---|---|------------------|----------|---------|---------|
|      | t | p | i | c | r |                  |          | energy  | density |
|      | e | d | i | u | i |                  |          | change  | DIIS    |
|      | r | t | s | t | d | total energy     | energy   | change  | error   |
| etot | 1 | N | N | 2 | U | -815.12760518104 |          | 7.2E-04 | 7.2E-03 |
| etot | 2 | Y | Y | 6 | M | -815.13767931827 | 1.0E-02  | 1.8E-04 | 1.9E-03 |
| etot | 3 | N | Y | 2 | U | -815.13789955582 | 2.2E-04  | 6.7E-05 | 1.3E-03 |
| etot | 4 | Y | Y | 6 | M | -815.13792619566 | 2.7E-05  | 2.7E-05 | 3.2E-04 |
| etot | 5 | Y | Y | 6 | M | -815.13793533269 | 9.1E-06  | 8.7E-06 | 2.0E-04 |
| etot | 6 | Y | Y | 6 | M | -815.13793357215 | -1.8E-06 | 4.2E-06 | 5.6E-05 |
| etot | 7 | Y | N | 6 | M | -815.13793352362 | -4.9E-08 | 0.0E+00 | 0.0E+00 |

Energy components, in hartrees:

|     |                               |                   |       |
|-----|-------------------------------|-------------------|-------|
| (A) | Nuclear repulsion.....        | 1445.08667931854  |       |
| (E) | Total one-electron terms..... | -3975.79206470248 |       |
| (I) | Total two-electron terms..... | 1715.56745186032  |       |
| (L) | Electronic energy.....        | -2260.22461284216 | (E+I) |
| (N) | Total energy.....             | -815.13793352362  | (A+L) |

SCFE: SCF energy: HF -815.13793352362 hartrees iterations: 7

HOMO energy: -0.29608

LUMO energy: 0.11778

Orbital energies:

|           |           |           |           |           |           |
|-----------|-----------|-----------|-----------|-----------|-----------|
| -20.45377 | -15.55301 | -11.32351 | -11.23699 | -11.22760 | -11.21457 |
| -11.20825 | -11.20185 | -11.19003 | -11.18887 | -11.18820 | -11.18703 |
| -11.18648 | -11.18508 | -11.18079 | -11.18069 | -11.17912 | -11.17796 |
| -11.17499 | -11.16610 | -1.42036  | -1.32425  | -1.17772  | -1.15711  |
| -1.11197  | -1.08473  | -1.03791  | -1.02795  | -1.01739  | -0.99887  |
| -0.94752  | -0.90173  | -0.85264  | -0.84182  | -0.82960  | -0.80805  |
| -0.78803  | -0.75931  | -0.71787  | -0.68415  | -0.68106  | -0.66905  |
| -0.65571  | -0.64293  | -0.63677  | -0.62308  | -0.61471  | -0.60606  |

```

-0.60307   -0.60158   -0.58967   -0.58280   -0.55726   -0.54617
-0.53219   -0.52452   -0.51600   -0.51183   -0.49844   -0.49445
-0.49062   -0.48446   -0.45674   -0.42034   -0.39463   -0.35087
-0.34044   -0.31317   -0.29608    0.11778    0.13179    0.13696
 0.13912    0.20433    0.21826    0.26296    0.27011    0.27843
 0.30321

```

end of program scf

start of program derla  
end of program derla

```

start of program rwr
recomputing RwR matrix   4      grid:   4
recomputing RwR matrix  15      grid:   4
end of program rwr

```

start of program derlb

forces (hartrees/bohr) : total

| atom  | label | x             | y             | z             |
|-------|-------|---------------|---------------|---------------|
| ----  | ----- | -----         | -----         | -----         |
| 1     | H25   | 1.082376E-03  | 2.860015E-04  | 2.281768E-03  |
| 2     | C1    | 3.222330E-03  | -1.585870E-04 | 1.836401E-03  |
| 3     | C2    | -5.136555E-03 | 2.238841E-03  | -6.126828E-03 |
| 4     | C3    | 7.972063E-03  | 1.605087E-03  | 6.142764E-03  |
| 5     | C4    | 4.783526E-03  | -1.837015E-03 | 6.120872E-03  |
| 6     | C5    | -6.951960E-03 | -1.869077E-03 | -1.501968E-03 |
| 7     | C6    | -7.877590E-03 | -2.013762E-03 | -6.614666E-03 |
| 8     | C7    | 2.324878E-03  | 2.668237E-04  | 3.840875E-03  |
| 9     | H27   | -1.030510E-04 | -1.556590E-03 | 2.187182E-03  |
| 10    | H28   | -1.073646E-03 | -1.573911E-03 | -5.068402E-04 |
| 11    | H30   | -1.072145E-03 | -8.072346E-04 | -1.908643E-03 |
| 12    | C8    | 8.461190E-03  | 3.537095E-03  | -7.681314E-04 |
| 13    | H32   | 3.677220E-04  | 2.713555E-04  | 1.631253E-03  |
| 14    | C10   | 4.261853E-03  | -1.606562E-03 | 2.587965E-04  |
| 15    | N2    | -5.150917E-03 | -7.681990E-03 | 4.407027E-03  |
| 16    | C9    | 2.803416E-04  | 4.767250E-03  | -7.996029E-03 |
| 17    | O1    | -5.488620E-03 | 1.176252E-03  | -3.363509E-03 |
| 18    | H43   | 1.243694E-03  | 2.002689E-03  | -4.705330E-04 |
| 19    | C12   | -7.955533E-03 | 6.713513E-03  | 9.211370E-04  |
| 20    | C11   | 5.644125E-03  | 5.336180E-03  | -4.764648E-03 |
| 21    | C19   | -2.746204E-03 | -8.127269E-03 | 2.220314E-03  |
| 22    | C13   | -6.017972E-03 | 9.420573E-03  | 2.397737E-03  |
| 23    | C14   | -2.752859E-03 | -5.818407E-03 | 9.412731E-04  |
| 24    | C15   | 3.007362E-03  | -5.755522E-03 | -1.330078E-03 |
| 25    | C16   | 6.142501E-03  | -3.906929E-03 | -2.808611E-04 |
| 26    | C17   | 8.481408E-04  | 3.385474E-03  | 1.125427E-04  |
| 27    | H49   | 2.016984E-03  | 2.797799E-03  | 1.455498E-04  |
| 28    | H50   | 3.152453E-05  | -2.233240E-03 | -7.607697E-04 |
| 29    | H51   | 2.102534E-03  | -7.884871E-04 | -7.388283E-04 |
| 30    | H52   | -1.875499E-03 | -3.625785E-03 | -8.817577E-04 |
| 31    | H53   | -2.978004E-04 | 2.186788E-03  | 6.440159E-04  |
| 32    | H1    | 8.646609E-04  | -6.290993E-04 | 2.061954E-03  |
| 33    | H2    | 2.892355E-03  | 1.728978E-03  | 5.846091E-04  |
| 34    | H3    | -2.498431E-03 | 5.215111E-03  | -1.569047E-03 |
| 35    | H4    | -4.071073E-04 | -1.202637E-03 | 9.652473E-04  |
| ----- | ----- | -----         | -----         | -----         |

total 1.442718E-04 1.743710E-03 1.181800E-04

end of program der1b

start of program geopt 2

geometry optimization step 2  
reading input hessian of dimension 105  
in five columns format

energy change: -1.9038E-02 . ( 5.0000E-05 )  
gradient maximum: 1.5112E-02 . ( 4.5000E-04 )  
gradient rms: 3.9810E-03 . ( 3.0000E-04 )  
step size: 0.19393 trust radius: 0.30000  
displacement maximum: 5.2508E-02 . ( 1.8000E-03 )  
displacement rms: 1.7345E-02 . ( 1.2000E-03 )  
predicted energy change: -2.4874E-03 geom step: 1.9393E-01 full step:  
1.9393E-01  
molecular structure not yet converged...

center of mass moved by:  
x: -9.1451E-03 y: 5.7245E-03 z: -8.6685E-03

new geometry:

|      | angstroms     |               |               |
|------|---------------|---------------|---------------|
| atom | x             | y             | z             |
| H25  | 0.7967260056  | 2.3299018677  | -3.9857803870 |
| C1   | 1.4350552114  | 2.2470470588  | -3.1302158988 |
| C2   | 3.1283906435  | 2.0568506211  | -0.8781592526 |
| C3   | 1.1717758371  | 1.3080134690  | -2.1402986284 |
| C4   | 2.5382161341  | 3.0723658784  | -2.9890298644 |
| C5   | 3.3739719773  | 2.9820723567  | -1.8719761634 |
| C6   | 2.0290344166  | 1.2313051884  | -1.0324418956 |
| C7   | 0.1192569272  | 0.2994461727  | -1.9529932793 |
| H27  | 2.7578960807  | 3.7969745514  | -3.7433059465 |
| H28  | 4.2187418778  | 3.6343781462  | -1.7889011473 |
| H30  | 3.7568061523  | 1.9584819367  | -0.0173633228 |
| C8   | 0.3931011506  | -0.3356880661 | -0.8047252733 |
| H32  | -0.6981143562 | 0.1139484770  | -2.6132475788 |
| C10  | -0.1345300353 | -1.4498695090 | 0.0731199874  |
| N2   | 1.5406187330  | 0.2121584957  | -0.2301351582 |
| C9   | 1.9197607438  | -0.3472592728 | 0.9693225814  |
| O1   | 2.8601281695  | -0.0062431820 | 1.6459629914  |
| H43  | -0.0723505993 | -2.3801380751 | -0.4689640688 |
| C12  | -1.5763049703 | -1.2459444137 | 0.5110623919  |
| C11  | 0.9218202784  | -1.4793124559 | 1.2572126749  |
| C19  | 0.3866400189  | -1.3294505456 | 2.6907977333  |
| C13  | -3.7299280302 | -2.2037612738 | 1.0635112955  |
| C14  | -3.3840615928 | 0.1532990657  | 1.2654439928  |
| C15  | -4.2171030909 | -0.9517970593 | 1.3890197856  |
| C16  | -2.0768445187 | 0.0095389688  | 0.8244966889  |
| C17  | -2.4184919437 | -2.3452322200 | 0.6280627563  |
| H49  | -4.3611343315 | -3.0661896878 | 1.1428437857  |
| H50  | -3.7524013898 | 1.1296861103  | 1.5075599138  |
| H51  | -5.2246937354 | -0.8347534890 | 1.7251651001  |
| H52  | -1.4526613471 | 0.8730615904  | 0.7163835312  |
| H53  | -2.0526004711 | -3.3214508488 | 0.3762451729  |
| H1   | 1.2181467842  | -1.3334586393 | 3.3860816770  |
| H2   | -0.2748264783 | -2.1404264500 | 2.9293103096  |
| H3   | -0.1519777723 | -0.3950452424 | 2.7982047617  |

H4            1.4769903361        -2.4067640012            1.2037165899

nuclear repulsion energy..... 1449.525488251 hartrees

-----  
/ end of geometry optimization iteration 2 /  
-----

end of program geopt

start of program onee

smallest eigenvalue of S: 1.224E-03

number of canonical orbitals..... 210

end of program onee

start of program probe

end of program probe

start of program grid

number of gridpoints:

| atom     | H25 | C1  | C2  | C3  | C4  | C5  | C6  | C7  |
|----------|-----|-----|-----|-----|-----|-----|-----|-----|
| grid # 1 | 73  | 89  | 87  | 90  | 87  | 87  | 85  | 85  |
| grid # 2 | 106 | 100 | 97  | 98  | 98  | 99  | 91  | 92  |
| grid # 3 | 224 | 183 | 183 | 195 | 182 | 183 | 187 | 182 |
| grid # 4 | 224 | 379 | 381 | 406 | 377 | 380 | 372 | 378 |

number of gridpoints:

| atom     | H27 | H28 | H30 | C8  | H32 | C10 | N2  | C9  |
|----------|-----|-----|-----|-----|-----|-----|-----|-----|
| grid # 1 | 73  | 73  | 73  | 86  | 73  | 82  | 99  | 76  |
| grid # 2 | 106 | 106 | 105 | 91  | 105 | 93  | 109 | 80  |
| grid # 3 | 224 | 224 | 220 | 187 | 223 | 175 | 225 | 164 |
| grid # 4 | 224 | 224 | 219 | 373 | 228 | 350 | 402 | 332 |

number of gridpoints:

| atom     | O1  | H43 | C12 | C11 | C19 | C13 | C14 | C15 |
|----------|-----|-----|-----|-----|-----|-----|-----|-----|
| grid # 1 | 111 | 69  | 90  | 81  | 71  | 87  | 87  | 89  |
| grid # 2 | 123 | 97  | 106 | 93  | 75  | 99  | 99  | 99  |
| grid # 3 | 272 | 210 | 195 | 175 | 142 | 182 | 183 | 183 |
| grid # 4 | 473 | 204 | 401 | 358 | 305 | 378 | 378 | 376 |

number of gridpoints:

| atom     | C16 | C17 | H49 | H50 | H51 | H52 | H53 | H1  |
|----------|-----|-----|-----|-----|-----|-----|-----|-----|
| grid # 1 | 86  | 84  | 73  | 73  | 73  | 70  | 72  | 71  |
| grid # 2 | 98  | 98  | 106 | 106 | 106 | 101 | 103 | 99  |
| grid # 3 | 182 | 182 | 224 | 223 | 224 | 213 | 216 | 219 |
| grid # 4 | 378 | 377 | 224 | 223 | 224 | 211 | 215 | 220 |

number of gridpoints:

| atom     | H2  | H3  | H4  | total |
|----------|-----|-----|-----|-------|
| grid # 1 | 71  | 71  | 70  | 2817  |
| grid # 2 | 99  | 97  | 100 | 3480  |
| grid # 3 | 219 | 216 | 218 | 7039  |
| grid # 4 | 218 | 212 | 212 | 10836 |

end of program grid

start of program rwr

recomputing RwR matrix 15        grid: 4

end of program rwr

start of program scf

|      | i | u | d | i | g |                  | energy   | RMS     | maximum |
|------|---|---|---|---|---|------------------|----------|---------|---------|
|      | t | p | i | c | r |                  | change   | density | DIIS    |
|      | e | d | i | u | i |                  |          | change  | error   |
|      | r | t | s | t | d | total energy     |          |         |         |
| etot | 1 | N | N | 2 | U | -815.13064395291 |          | 5.6E-04 | 1.0E-02 |
| etot | 2 | Y | Y | 6 | M | -815.13890364201 | 8.3E-03  | 1.8E-04 | 3.1E-03 |
| etot | 3 | N | Y | 2 | U | -815.13975268411 | 8.5E-04  | 7.2E-05 | 1.2E-03 |
| etot | 4 | Y | Y | 6 | M | -815.13974997335 | -2.7E-06 | 3.0E-05 | 6.4E-04 |
| etot | 5 | Y | Y | 6 | M | -815.13979028527 | 4.0E-05  | 9.3E-06 | 2.4E-04 |
| etot | 6 | Y | Y | 6 | M | -815.13979256254 | 2.3E-06  | 5.3E-06 | 1.2E-04 |
| etot | 7 | Y | Y | 6 | M | -815.13979576879 | 3.2E-06  | 1.6E-06 | 2.8E-05 |
| etot | 8 | N | N | 2 | U | -815.13987365587 | 7.8E-05  | 0.0E+00 | 0.0E+00 |

Energy components, in hartrees:

|     |                               |                   |       |
|-----|-------------------------------|-------------------|-------|
| (A) | Nuclear repulsion.....        | 1449.52548825116  |       |
| (E) | Total one-electron terms..... | -3984.60110961014 |       |
| (I) | Total two-electron terms..... | 1719.93574770311  |       |
| (L) | Electronic energy.....        | -2264.66536190703 | (E+I) |
| (N) | Total energy.....             | -815.13987365587  | (A+L) |

SCFE: SCF energy: HF -815.13987365587 hartrees iterations: 8

HOMO energy: -0.29764  
LUMO energy: 0.11945

Orbital energies:

|           |           |           |           |           |           |
|-----------|-----------|-----------|-----------|-----------|-----------|
| -20.45232 | -15.55246 | -11.32119 | -11.23673 | -11.22347 | -11.21587 |
| -11.20772 | -11.20117 | -11.18840 | -11.18708 | -11.18654 | -11.18598 |
| -11.18444 | -11.18389 | -11.17965 | -11.17791 | -11.17741 | -11.17573 |
| -11.17271 | -11.16601 | -1.42321  | -1.33209  | -1.17920  | -1.16156  |
| -1.11234  | -1.08768  | -1.03870  | -1.02659  | -1.01869  | -1.00183  |
| -0.94965  | -0.90312  | -0.85408  | -0.84343  | -0.83130  | -0.81075  |
| -0.79120  | -0.76136  | -0.72035  | -0.68609  | -0.68135  | -0.66945  |
| -0.65684  | -0.64394  | -0.63875  | -0.62522  | -0.61304  | -0.60757  |
| -0.60360  | -0.60066  | -0.59238  | -0.58503  | -0.55509  | -0.54833  |
| -0.53333  | -0.52475  | -0.51722  | -0.51154  | -0.49910  | -0.49503  |
| -0.49029  | -0.48462  | -0.45819  | -0.42114  | -0.39345  | -0.34863  |
| -0.34346  | -0.31528  | -0.29764  | 0.11945   | 0.13368   | 0.13676   |
| 0.14074   | 0.20588   | 0.22009   | 0.26462   | 0.27184   | 0.28131   |
| 0.30470   |           |           |           |           |           |

end of program scf

start of program derla  
end of program derla

start of program rwr  
recomputing RwR matrix 15 grid: 4  
end of program rwr

start of program derlb

forces (hartrees/bohr) : total

| atom  | label | x             | y             | z             |
|-------|-------|---------------|---------------|---------------|
| 1     | H25   | -2.623631E-04 | 1.700799E-04  | -9.124781E-04 |
| 2     | C1    | 2.432552E-03  | 1.211666E-03  | 1.198601E-03  |
| 3     | C2    | 4.715643E-04  | -1.986015E-03 | 1.585579E-03  |
| 4     | C3    | -2.309690E-03 | 1.324897E-03  | 1.417885E-03  |
| 5     | C4    | -2.901685E-03 | -2.200260E-03 | 1.309211E-03  |
| 6     | C5    | -2.227007E-03 | -2.432971E-03 | -4.164661E-04 |
| 7     | C6    | 1.152702E-03  | -8.780845E-04 | -1.388603E-03 |
| 8     | C7    | 2.507957E-03  | -3.639032E-04 | -1.920657E-03 |
| 9     | H27   | -7.319205E-05 | 1.405911E-03  | -1.903195E-03 |
| 10    | H28   | 3.709943E-04  | 5.340245E-04  | -2.523943E-05 |
| 11    | H30   | -8.085029E-04 | -1.240634E-04 | 1.837915E-04  |
| 12    | C8    | -9.385822E-04 | 1.294605E-03  | 1.523497E-03  |
| 13    | H32   | 8.071532E-04  | 1.553965E-04  | 7.331486E-04  |
| 14    | C10   | 7.039373E-04  | 4.384921E-03  | 2.559956E-03  |
| 15    | N2    | 1.616081E-03  | 1.728965E-03  | 2.708001E-03  |
| 16    | C9    | -1.452199E-03 | -3.213018E-03 | -3.834215E-03 |
| 17    | O1    | 2.642902E-04  | 2.610004E-03  | 3.916516E-04  |
| 18    | H43   | 2.483463E-04  | -2.741756E-03 | -9.976686E-04 |
| 19    | C12   | -1.760753E-03 | -2.663642E-03 | 6.550794E-04  |
| 20    | C11   | 9.484241E-04  | 5.584168E-04  | 1.445251E-03  |
| 21    | C19   | 6.898760E-04  | 6.450851E-03  | -2.802946E-03 |
| 22    | C13   | 3.774411E-03  | 2.060100E-04  | -1.101554E-03 |
| 23    | C14   | 7.584081E-04  | -7.842765E-04 | -6.667253E-04 |
| 24    | C15   | 5.840972E-03  | 2.406323E-03  | -1.670542E-03 |
| 25    | C16   | -4.367034E-03 | 1.831214E-04  | 1.745718E-03  |
| 26    | C17   | -9.944412E-04 | 1.458779E-04  | 7.299726E-04  |
| 27    | H49   | 1.822174E-04  | -2.359941E-04 | -3.828083E-05 |
| 28    | H50   | -3.804916E-04 | 4.367151E-04  | 9.030745E-05  |
| 29    | H51   | -1.948547E-03 | 6.697194E-04  | 7.302620E-04  |
| 30    | H52   | 1.577978E-05  | 3.903787E-04  | -1.480019E-05 |
| 31    | H53   | 3.570102E-04  | -5.758122E-04 | -1.327843E-04 |
| 32    | H1    | 2.534299E-04  | 3.851687E-04  | -2.025601E-03 |
| 33    | H2    | -4.427410E-03 | -3.812410E-03 | 2.056013E-03  |
| 34    | H3    | 1.660708E-04  | -2.589512E-03 | 1.227096E-03  |
| 35    | H4    | 1.130577E-03  | -6.645597E-04 | -1.252721E-03 |
| total |       | -1.591435E-04 | 1.386774E-03  | 1.186543E-03  |

end of program derlb

start of program geopt 3

geometry optimization step 3  
reading input hessian of dimension 105  
in five columns format  
reading input hessian of dimension 105  
in five columns format

energy change: -1.9401E-03 . ( 5.0000E-05 )  
gradient maximum: 6.1173E-03 . ( 4.5000E-04 )  
gradient rms: 1.7467E-03 . ( 3.0000E-04 )  
step size: 0.17236 trust radius: 0.30000  
displacement maximum: 6.7777E-02 . ( 1.8000E-03 )  
displacement rms: 1.5416E-02 . ( 1.2000E-03 )



predicted energy change: -5.8629E-04 geom step: 1.7236E-01 full step:  
 1.7236E-01  
 molecular structure not yet converged...

center of mass moved by:  
 x: -8.0592E-03 y: 1.4053E-02 z: 6.2813E-03

new geometry:

|      | angstroms     |               |               |
|------|---------------|---------------|---------------|
| atom | x             | y             | z             |
| H25  | 0.8072865483  | 2.2760293482  | -4.0143546838 |
| C1   | 1.4325178336  | 2.2130871857  | -3.1459662973 |
| C2   | 3.0976253171  | 2.0667490363  | -0.8651597197 |
| C3   | 1.1712748712  | 1.2791840973  | -2.1512836582 |
| C4   | 2.5153655009  | 3.0583921385  | -2.9938746906 |
| C5   | 3.3377384538  | 2.9858852701  | -1.8643249838 |
| C6   | 2.0119854774  | 1.2279304907  | -1.0311111308 |
| C7   | 0.1465784669  | 0.2438782778  | -1.9771518293 |
| H27  | 2.7315919265  | 3.7820441542  | -3.7521825163 |
| H28  | 4.1726912194  | 3.6515563018  | -1.7754703926 |
| H30  | 3.7097514806  | 1.9852447292  | 0.0091292579  |
| C8   | 0.4010099143  | -0.3570219534 | -0.8084213467 |
| H32  | -0.6501742014 | 0.0275017732  | -2.6496760436 |
| C10  | -0.1229729538 | -1.4639393444 | 0.0786221673  |
| N2   | 1.5189677339  | 0.2254555354  | -0.2157299573 |
| C9   | 1.9020989706  | -0.3217707669 | 0.9829327639  |
| O1   | 2.8151205517  | 0.0629398142  | 1.6772920803  |
| H43  | -0.0678278284 | -2.4005658225 | -0.4590942179 |
| C12  | -1.5631049639 | -1.2451359645 | 0.5189991882  |
| C11  | 0.9418899756  | -1.4894534200 | 1.2530039693  |
| C19  | 0.4011021736  | -1.4041869419 | 2.6862463752  |
| C13  | -3.7226329608 | -2.1688535666 | 1.0469508290  |
| C14  | -3.3466156121 | 0.1851923676  | 1.2619589087  |
| C15  | -4.1902105651 | -0.9090297665 | 1.3697187430  |
| C16  | -2.0442039099 | 0.0183278048  | 0.8369931969  |
| C17  | -2.4164110075 | -2.3337937945 | 0.6249984247  |
| H49  | -4.3682653523 | -3.0199658461 | 1.1178566307  |
| H50  | -3.7060294944 | 1.1666422173  | 1.5007293633  |
| H51  | -5.2008383429 | -0.7766856075 | 1.6958622372  |
| H52  | -1.4071642828 | 0.8716104968  | 0.7311012260  |
| H53  | -2.0627003799 | -3.3147832946 | 0.3713148177  |
| H1   | 1.2439048961  | -1.3948340451 | 3.3666321408  |
| H2   | -0.2266020434 | -2.2519354554 | 2.9147482339  |
| H3   | -0.1771930683 | -0.5044698803 | 2.8328919287  |
| H4   | 1.5287631081  | -2.3957569091 | 1.1654660655  |

nuclear repulsion energy..... 1452.259395357 hartrees

-----  
 / end of geometry optimization iteration 3 /  
 -----

end of program geopt

start of program onee  
 smallest eigenvalue of S: 1.213E-03  
 number of canonical orbitals..... 210  
 end of program onee

start of program probe  
 end of program probe

start of program grid

number of gridpoints:

|          |     |     |     |     |     |     |     |     |
|----------|-----|-----|-----|-----|-----|-----|-----|-----|
| atom     | H25 | C1  | C2  | C3  | C4  | C5  | C6  | C7  |
| grid # 1 | 73  | 89  | 87  | 90  | 87  | 87  | 85  | 85  |
| grid # 2 | 106 | 100 | 97  | 98  | 98  | 99  | 91  | 92  |
| grid # 3 | 224 | 183 | 183 | 194 | 182 | 182 | 187 | 183 |
| grid # 4 | 224 | 379 | 383 | 404 | 379 | 379 | 372 | 376 |

number of gridpoints:

|          |     |     |     |     |     |     |     |     |
|----------|-----|-----|-----|-----|-----|-----|-----|-----|
| atom     | H27 | H28 | H30 | C8  | H32 | C10 | N2  | C9  |
| grid # 1 | 73  | 73  | 73  | 86  | 73  | 82  | 100 | 76  |
| grid # 2 | 106 | 106 | 105 | 91  | 105 | 93  | 109 | 80  |
| grid # 3 | 224 | 224 | 220 | 187 | 223 | 175 | 224 | 164 |
| grid # 4 | 224 | 224 | 219 | 372 | 227 | 352 | 402 | 334 |

number of gridpoints:

|          |     |     |     |     |     |     |     |     |
|----------|-----|-----|-----|-----|-----|-----|-----|-----|
| atom     | O1  | H43 | C12 | C11 | C19 | C13 | C14 | C15 |
| grid # 1 | 111 | 69  | 92  | 81  | 71  | 87  | 87  | 88  |
| grid # 2 | 127 | 97  | 106 | 93  | 78  | 99  | 99  | 100 |
| grid # 3 | 272 | 210 | 192 | 175 | 149 | 182 | 182 | 183 |
| grid # 4 | 474 | 203 | 396 | 359 | 307 | 377 | 379 | 377 |

number of gridpoints:

|          |     |     |     |     |     |     |     |     |
|----------|-----|-----|-----|-----|-----|-----|-----|-----|
| atom     | C16 | C17 | H49 | H50 | H51 | H52 | H53 | H1  |
| grid # 1 | 84  | 84  | 73  | 73  | 73  | 71  | 72  | 71  |
| grid # 2 | 97  | 98  | 106 | 106 | 106 | 101 | 103 | 99  |
| grid # 3 | 181 | 182 | 224 | 223 | 224 | 214 | 216 | 219 |
| grid # 4 | 375 | 378 | 224 | 223 | 224 | 212 | 215 | 220 |

number of gridpoints:

|          |     |     |     |       |
|----------|-----|-----|-----|-------|
| atom     | H2  | H3  | H4  | total |
| grid # 1 | 71  | 71  | 69  | 2817  |
| grid # 2 | 98  | 97  | 100 | 3486  |
| grid # 3 | 219 | 215 | 218 | 7039  |
| grid # 4 | 218 | 214 | 211 | 10836 |

end of program grid

start of program rwr

recomputing RwR matrix 15 grid: 4

end of program rwr

start of program scf

|      | i | u | d | i | g |                  |         | RMS     | maximum |
|------|---|---|---|---|---|------------------|---------|---------|---------|
|      | t | p | i | c | r |                  |         | density | DIIS    |
|      | e | d | i | u | i |                  | energy  | change  | error   |
|      | r | t | s | t | d | total energy     | change  |         |         |
| etot | 1 | N | N | 2 | U | -815.13359031216 |         | 3.8E-04 | 9.0E-03 |
| etot | 2 | Y | Y | 6 | M | -815.13965737775 | 6.1E-03 | 1.5E-04 | 3.4E-03 |
| etot | 3 | N | Y | 2 | U | -815.14024597539 | 5.9E-04 | 5.0E-05 | 1.0E-03 |
| etot | 4 | Y | Y | 6 | M | -815.14026120740 | 1.5E-05 | 1.9E-05 | 4.1E-04 |
| etot | 5 | Y | Y | 6 | M | -815.14028900003 | 2.8E-05 | 8.3E-06 | 1.4E-04 |
| etot | 6 | Y | Y | 6 | M | -815.14029029074 | 1.3E-06 | 3.5E-06 | 6.8E-05 |
| etot | 7 | Y | N | 6 | M | -815.14029185985 | 1.6E-06 | 0.0E+00 | 0.0E+00 |

Energy components, in hartrees:

```
(A) Nuclear repulsion..... 1452.25939535683
(E) Total one-electron terms..... -3990.06157287361
(I) Total two-electron terms..... 1722.66188565694
(L) Electronic energy..... -2267.39968721667 (E+I)
(N) Total energy..... -815.14029185985 (A+L)
```

SCFE: SCF energy: HF -815.14029185985 hartrees iterations: 7

HOMO energy: -0.29751

LUMO energy: 0.11942

Orbital energies:

```
-20.45210 -15.55235 -11.32113 -11.23569 -11.22260 -11.21520
-11.20773 -11.20061 -11.18781 -11.18611 -11.18531 -11.18480
-11.18354 -11.18295 -11.17940 -11.17699 -11.17692 -11.17559
-11.17260 -11.16545 -1.42254 -1.33385 -1.18059 -1.16278
-1.11297 -1.08898 -1.03871 -1.02898 -1.01946 -1.00185
-0.94904 -0.90414 -0.85404 -0.84396 -0.83155 -0.81171
-0.79190 -0.76122 -0.72113 -0.68612 -0.68111 -0.66955
-0.65664 -0.64425 -0.63886 -0.62544 -0.61349 -0.60747
-0.60429 -0.60263 -0.59182 -0.58432 -0.55535 -0.54830
-0.53251 -0.52410 -0.51766 -0.51191 -0.49913 -0.49462
-0.49002 -0.48521 -0.45820 -0.42147 -0.39394 -0.35031
-0.34292 -0.31547 -0.29751 0.11942 0.13357 0.13855
0.14128 0.20607 0.22031 0.26454 0.27197 0.28119
0.30560
```

end of program scf

start of program derla

end of program derla

start of program rwr

recomputing RwR matrix 15 grid: 4

end of program rwr

start of program derlb

forces (hartrees/bohr) : total

| atom | label | x             | y             | z             |
|------|-------|---------------|---------------|---------------|
| 1    | H25   | 1.010580E-04  | 1.942380E-05  | -3.552070E-05 |
| 2    | C1    | 5.074994E-04  | 4.964675E-04  | -1.266648E-04 |
| 3    | C2    | -6.766024E-04 | -9.589108E-04 | 4.736512E-04  |
| 4    | C3    | -1.953185E-04 | -6.409867E-04 | -8.061010E-04 |
| 5    | C4    | -9.044525E-04 | -1.230562E-03 | 1.115862E-03  |
| 6    | C5    | 8.100580E-04  | 1.482815E-04  | -8.885323E-04 |
| 7    | C6    | -1.376086E-04 | 2.105949E-03  | 1.479087E-03  |
| 8    | C7    | 1.557922E-04  | 1.843155E-03  | -6.733394E-04 |
| 9    | H27   | 2.462770E-04  | 8.110729E-04  | -6.671167E-04 |
| 10   | H28   | -2.242361E-04 | 4.001475E-04  | -2.982147E-04 |
| 11   | H30   | -6.346412E-04 | 1.426222E-04  | -2.171208E-04 |
| 12   | C8    | -1.289446E-03 | -1.883674E-03 | 2.165353E-03  |
| 13   | H32   | -2.924584E-04 | -6.572313E-05 | -5.545253E-04 |
| 14   | C10   | 9.545611E-04  | 1.787046E-03  | -3.436936E-04 |

|       |       |               |               |               |
|-------|-------|---------------|---------------|---------------|
| 15    | N2    | 3.326501E-03  | -4.700836E-04 | -1.308199E-03 |
| 16    | C9    | -1.133265E-03 | 2.086582E-04  | 2.772878E-03  |
| 17    | O1    | -1.033850E-03 | -1.216126E-04 | -1.558166E-03 |
| 18    | H43   | -4.363843E-04 | -8.567623E-04 | 4.806195E-05  |
| 19    | C12   | 2.341601E-03  | -1.197351E-03 | 6.101532E-04  |
| 20    | C11   | -2.071413E-03 | -2.757577E-04 | 2.607449E-04  |
| 21    | C19   | 2.364914E-03  | 1.127246E-03  | 2.555360E-04  |
| 22    | C13   | -1.171573E-03 | 2.179477E-04  | 6.241987E-04  |
| 23    | C14   | -2.023048E-03 | 6.421807E-05  | 4.696616E-04  |
| 24    | C15   | -6.651299E-04 | 8.090348E-04  | 4.455158E-04  |
| 25    | C16   | 1.390028E-03  | -3.219050E-04 | -1.600996E-03 |
| 26    | C17   | 2.658039E-03  | -1.094508E-05 | -8.144298E-04 |
| 27    | H49   | -9.230256E-04 | -4.685583E-04 | 2.637308E-04  |
| 28    | H50   | -5.172524E-05 | -3.106668E-04 | 1.206580E-04  |
| 29    | H51   | -1.168443E-03 | 6.195567E-05  | 2.968585E-04  |
| 30    | H52   | 1.203254E-03  | 5.984256E-04  | 1.510966E-04  |
| 31    | H53   | 2.525677E-04  | 9.793345E-05  | 2.755141E-05  |
| 32    | H1    | -5.641611E-04 | 6.756994E-04  | 3.445955E-04  |
| 33    | H2    | -1.004026E-03 | -1.611655E-03 | -1.380153E-04 |
| 34    | H3    | -3.083528E-04 | 5.235400E-04  | 2.332260E-04  |
| 35    | H4    | 5.023782E-04  | -4.648487E-04 | -7.979136E-04 |
| ----- |       |               |               |               |
|       | total | -9.463140E-05 | 1.248822E-03  | 1.329869E-03  |

end of program derlb

start of program geopt 4

geometry optimization step 4

reading input hessian of dimension 105  
in five columns format  
reading input hessian of dimension 105  
in five columns format  
reading input hessian of dimension 105  
in five columns format

energy change: -4.1820E-04 . ( 5.0000E-05 )  
gradient maximum: 3.4808E-03 . ( 4.5000E-04 )  
gradient rms: 8.6489E-04 . ( 3.0000E-04 )  
step size: 0.12936 trust radius: 0.30000  
displacement maximum: 5.2835E-02 . ( 1.8000E-03 )  
displacement rms: 1.1571E-02 . ( 1.2000E-03 )  
predicted energy change: -2.1245E-04 geom step: 1.2936E-01 full step:  
1.2936E-01  
molecular structure not yet converged...

center of mass moved by:

x: -1.9215E-05 y: 9.9106E-04 z: 7.1413E-04

new geometry:

|      | angstroms    |              |               |
|------|--------------|--------------|---------------|
| atom | x            | y            | z             |
| H25  | 0.7971728644 | 2.2788644224 | -4.0061444076 |
| C1   | 1.4208187167 | 2.2167246925 | -3.1373359925 |
| C2   | 3.0833185063 | 2.0685756628 | -0.8556339552 |
| C3   | 1.1686646005 | 1.2715228110 | -2.1504975179 |
| C4   | 2.4920270548 | 3.0725243510 | -2.9770316540 |
| C5   | 3.3153295384 | 2.9976324606 | -1.8492382985 |
| C6   | 2.0084442984 | 1.2201275787 | -1.0299260254 |
| C7   | 0.1542915881 | 0.2261191337 | -1.9856358417 |

|     |               |               |               |
|-----|---------------|---------------|---------------|
| H27 | 2.7002286996  | 3.8084924687  | -3.7288020235 |
| H28 | 4.1386185412  | 3.6768717965  | -1.7547889150 |
| H30 | 3.6891010041  | 1.9903230738  | 0.0204351535  |
| C8  | 0.4134985652  | -0.3841207353 | -0.8212229852 |
| H32 | -0.6404945515 | 0.0089886275  | -2.6598308865 |
| C10 | -0.1149989585 | -1.4807588295 | 0.0720047200  |
| N2  | 1.5331951653  | 0.1973221852  | -0.2311141871 |
| C9  | 1.8876571739  | -0.3219473858 | 0.9907675648  |
| O1  | 2.7804022497  | 0.0887181541  | 1.7013369128  |
| H43 | -0.0723242168 | -2.4260811476 | -0.4551827176 |
| C12 | -1.5485503169 | -1.2473907255 | 0.5149149371  |
| C11 | 0.9445626114  | -1.5049765934 | 1.2471248647  |
| C19 | 0.3976244387  | -1.4436765611 | 2.6773594604  |
| C13 | -3.7096764648 | -2.1450107608 | 1.0846319371  |
| C14 | -3.3265823197 | 0.2141151856  | 1.2134605377  |
| C15 | -4.1734859629 | -0.8729496446 | 1.3626069905  |
| C16 | -2.0254074096 | 0.0279171718  | 0.7899165733  |
| C17 | -2.4040174809 | -2.3291908113 | 0.6634824294  |
| H49 | -4.3599908435 | -2.9908229876 | 1.1896650309  |
| H50 | -3.6811279041 | 1.2041585751  | 1.4211081108  |
| H51 | -5.1852252049 | -0.7264529610 | 1.6865655428  |
| H52 | -1.3822667972 | 0.8757593893  | 0.6563392551  |
| H53 | -2.0536835868 | -3.3196722055 | 0.4443587969  |
| H1  | 1.2359945838  | -1.4272358678 | 3.3621063119  |
| H2  | -0.2193508808 | -2.3096898193 | 2.8890726002  |
| H3  | -0.1979147328 | -0.5584397401 | 2.8376325835  |
| H4  | 1.5488227375  | -2.3992270283 | 1.1439156061  |

nuclear repulsion energy..... 1453.856370874 hartrees

-----  
 / end of geometry optimization iteration 4 /  
 -----

end of program geopt

start of program onee  
 smallest eigenvalue of S: 1.209E-03  
 number of canonical orbitals..... 210  
 end of program onee

start of program probe  
 end of program probe

start of program grid

number of gridpoints:

| atom     | H25 | C1  | C2  | C3  | C4  | C5  | C6  | C7  |
|----------|-----|-----|-----|-----|-----|-----|-----|-----|
| grid # 1 | 73  | 89  | 87  | 90  | 87  | 87  | 85  | 85  |
| grid # 2 | 106 | 99  | 97  | 98  | 98  | 98  | 91  | 92  |
| grid # 3 | 224 | 183 | 183 | 194 | 182 | 182 | 187 | 183 |
| grid # 4 | 224 | 379 | 380 | 405 | 379 | 379 | 373 | 377 |

number of gridpoints:

| atom     | H27 | H28 | H30 | C8  | H32 | C10 | N2  | C9  |
|----------|-----|-----|-----|-----|-----|-----|-----|-----|
| grid # 1 | 73  | 73  | 73  | 86  | 73  | 82  | 99  | 75  |
| grid # 2 | 106 | 106 | 105 | 91  | 105 | 93  | 109 | 80  |
| grid # 3 | 224 | 224 | 220 | 186 | 223 | 175 | 223 | 163 |
| grid # 4 | 224 | 224 | 218 | 372 | 227 | 350 | 402 | 333 |

number of gridpoints:

|          |     |     |     |     |     |     |     |     |
|----------|-----|-----|-----|-----|-----|-----|-----|-----|
| atom     | O1  | H43 | C12 | C11 | C19 | C13 | C14 | C15 |
| grid # 1 | 111 | 69  | 92  | 81  | 71  | 87  | 88  | 89  |
| grid # 2 | 127 | 97  | 106 | 93  | 75  | 100 | 99  | 100 |
| grid # 3 | 272 | 210 | 193 | 175 | 143 | 182 | 182 | 183 |
| grid # 4 | 475 | 205 | 396 | 359 | 303 | 379 | 379 | 379 |

number of gridpoints:

|          |     |     |     |     |     |     |     |     |
|----------|-----|-----|-----|-----|-----|-----|-----|-----|
| atom     | C16 | C17 | H49 | H50 | H51 | H52 | H53 | H1  |
| grid # 1 | 85  | 84  | 73  | 73  | 73  | 70  | 72  | 71  |
| grid # 2 | 97  | 99  | 106 | 106 | 106 | 101 | 103 | 99  |
| grid # 3 | 181 | 182 | 224 | 223 | 224 | 213 | 216 | 220 |
| grid # 4 | 376 | 378 | 224 | 223 | 224 | 212 | 215 | 221 |

number of gridpoints:

|          |     |     |     |       |
|----------|-----|-----|-----|-------|
| atom     | H2  | H3  | H4  | total |
| grid # 1 | 71  | 71  | 69  | 2817  |
| grid # 2 | 98  | 98  | 100 | 3484  |
| grid # 3 | 219 | 216 | 218 | 7032  |
| grid # 4 | 218 | 214 | 211 | 10837 |

end of program grid

start of program rwr

recomputing RwR matrix 15 grid: 4

end of program rwr

start of program scf

|      | i | u | d | i | g |                  |               | RMS     | maximum |
|------|---|---|---|---|---|------------------|---------------|---------|---------|
|      | t | p | i | c | r |                  |               | energy  | DIIS    |
|      | e | d | i | u | i |                  |               | density | error   |
|      | r | t | s | t | d | total energy     | energy change | change  |         |
| etot | 1 | N | N | 2 | U | -815.13572766272 |               | 3.0E-04 | 6.9E-03 |
| etot | 2 | Y | Y | 6 | M | -815.13999463142 | 4.3E-03       | 1.2E-04 | 2.9E-03 |
| etot | 3 | Y | Y | 6 | M | -815.14048790420 | 4.9E-04       | 4.3E-05 | 8.5E-04 |
| etot | 4 | N | Y | 2 | U | -815.14047681929 | -1.1E-05      | 1.4E-05 | 3.0E-04 |
| etot | 5 | Y | Y | 6 | M | -815.14048249198 | 5.7E-06       | 7.0E-06 | 1.1E-04 |
| etot | 6 | Y | Y | 6 | M | -815.14048109639 | -1.4E-06      | 2.2E-06 | 3.4E-05 |
| etot | 7 | Y | N | 6 | M | -815.14048184542 | 7.5E-07       | 0.0E+00 | 0.0E+00 |

Energy components, in hartrees:

|     |                               |                   |       |
|-----|-------------------------------|-------------------|-------|
| (A) | Nuclear repulsion.....        | 1453.85637087401  |       |
| (E) | Total one-electron terms..... | -3993.25555717667 |       |
| (I) | Total two-electron terms..... | 1724.25870445724  |       |
| (L) | Electronic energy.....        | -2268.99685271943 | (E+I) |
| (N) | Total energy.....             | -815.14048184542  | (A+L) |

SCFE: SCF energy: HF -815.14048184542 hartrees iterations: 7

HOMO energy: -0.29716

LUMO energy: 0.11902

Orbital energies:

|           |           |           |           |           |           |
|-----------|-----------|-----------|-----------|-----------|-----------|
| -20.45239 | -15.55245 | -11.32148 | -11.23577 | -11.22237 | -11.21496 |
| -11.20797 | -11.20029 | -11.18768 | -11.18638 | -11.18575 | -11.18493 |
| -11.18384 | -11.18306 | -11.17915 | -11.17713 | -11.17667 | -11.17560 |

|           |           |          |          |          |          |
|-----------|-----------|----------|----------|----------|----------|
| -11.17253 | -11.16566 | -1.42098 | -1.33377 | -1.18091 | -1.16293 |
| -1.11387  | -1.08882  | -1.03893 | -1.02849 | -1.01996 | -1.00159 |
| -0.94916  | -0.90456  | -0.85399 | -0.84385 | -0.83164 | -0.81176 |
| -0.79153  | -0.76122  | -0.72095 | -0.68663 | -0.68120 | -0.66910 |
| -0.65735  | -0.64364  | -0.63922 | -0.62535 | -0.61371 | -0.60779 |
| -0.60381  | -0.60209  | -0.59208 | -0.58389 | -0.55452 | -0.54889 |
| -0.53184  | -0.52403  | -0.51719 | -0.51233 | -0.49905 | -0.49506 |
| -0.49039  | -0.48508  | -0.45820 | -0.42181 | -0.39395 | -0.35002 |
| -0.34291  | -0.31579  | -0.29716 | 0.11902  | 0.13350  | 0.13788  |
| 0.14164   | 0.20580   | 0.21992  | 0.26417  | 0.27197  | 0.28143  |
| 0.30648   |           |          |          |          |          |

end of program scf

start of program derla  
end of program derla

start of program rwr  
recomputing RwR matrix 15 grid: 4  
end of program rwr

start of program der1b

forces (hartrees/bohr) : total

| atom | label | x             | y             | z             |
|------|-------|---------------|---------------|---------------|
| 1    | H25   | -3.441725E-04 | 7.867304E-05  | -3.358111E-04 |
| 2    | C1    | -6.810300E-04 | -5.433485E-04 | 1.988254E-05  |
| 3    | C2    | -5.462027E-04 | 9.048680E-04  | -1.405041E-03 |
| 4    | C3    | -1.002052E-04 | -2.925457E-04 | -1.393725E-03 |
| 5    | C4    | 3.969773E-04  | 8.946297E-05  | -2.457347E-04 |
| 6    | C5    | 4.027622E-04  | 8.079543E-04  | 7.270992E-04  |
| 7    | C6    | 4.855956E-04  | -2.987928E-04 | -2.763502E-04 |
| 8    | C7    | -4.753323E-06 | 3.356626E-04  | 9.055734E-05  |
| 9    | H27   | -5.506455E-05 | -4.331423E-04 | 4.008450E-04  |
| 10   | H28   | 9.773562E-05  | -3.552234E-06 | 8.238032E-05  |
| 11   | H30   | 8.050837E-04  | -1.583338E-05 | 9.943578E-04  |
| 12   | C8    | 1.389044E-04  | -7.010970E-04 | -5.437636E-04 |
| 13   | H32   | -7.016485E-04 | 1.637367E-04  | -5.328706E-04 |
| 14   | C10   | 8.052453E-04  | -1.594617E-03 | -1.239903E-03 |
| 15   | N2    | 3.460582E-04  | 1.825580E-03  | 3.900681E-03  |
| 16   | C9    | 4.763710E-03  | 1.578913E-03  | 2.313807E-03  |
| 17   | O1    | -5.275677E-03 | -1.788269E-03 | -4.008281E-03 |
| 18   | H43   | 1.186111E-04  | 4.519452E-04  | 2.360278E-04  |
| 19   | C12   | -1.531970E-04 | 1.668178E-04  | 3.803062E-04  |
| 20   | C11   | -1.022065E-03 | 1.379460E-03  | 3.217867E-04  |
| 21   | C19   | 4.700400E-04  | -2.962397E-03 | 1.251723E-03  |
| 22   | C13   | -8.478524E-04 | -5.329280E-04 | 3.923850E-04  |
| 23   | C14   | -1.361897E-03 | -2.017479E-04 | 5.067244E-04  |
| 24   | C15   | -1.580103E-03 | 9.467885E-04  | 6.432528E-04  |
| 25   | C16   | 1.760169E-03  | 8.792614E-04  | -6.371640E-04 |
| 26   | C17   | 1.180897E-03  | 1.521576E-04  | -4.193959E-04 |
| 27   | H49   | 5.370760E-05  | 1.595859E-04  | 4.485439E-05  |
| 28   | H50   | -1.057536E-04 | -1.501169E-04 | 1.332931E-05  |
| 29   | H51   | 4.912426E-04  | -7.199618E-05 | -1.492869E-04 |
| 30   | H52   | -3.160148E-04 | -7.582056E-04 | 1.237614E-04  |
| 31   | H53   | 1.520809E-04  | 4.341062E-05  | -5.119927E-05 |
| 32   | H1    | -3.497523E-04 | 7.508782E-05  | 6.801302E-04  |

|       |       |               |               |               |
|-------|-------|---------------|---------------|---------------|
| 33    | H2    | 1.173676E-03  | 1.166402E-03  | 4.775717E-05  |
| 34    | H3    | -5.276980E-04 | 1.060908E-03  | -6.574441E-04 |
| 35    | H4    | -5.167100E-05 | -2.984202E-04 | 4.328851E-05  |
| ----- |       |               |               |               |
|       | total | -3.822621E-04 | 1.619666E-03  | 1.318966E-03  |

end of program derlb

start of program geopt 5

geometry optimization step 5  
 reading input hessian of dimension 105  
 in five columns format  
 reading input hessian of dimension 105  
 in five columns format

energy change: -1.8999E-04 . ( 5.0000E-05 )  
 gradient maximum: 6.8972E-03 . ( 4.5000E-04 )  
 gradient rms: 8.8976E-04 . ( 3.0000E-04 )  
 step size: 0.19647 trust radius: 0.30000  
 displacement maximum: 7.3864E-02 . ( 1.8000E-03 )  
 displacement rms: 1.7573E-02 . ( 1.2000E-03 )  
 predicted energy change: -2.6389E-04 geom step: 1.9647E-01 full step:  
 1.9647E-01  
 molecular structure not yet converged...

center of mass moved by:  
 x: -1.1720E-02 y: 1.7754E-02 z: 4.7623E-03

new geometry:

|      | angstroms     |               |               |
|------|---------------|---------------|---------------|
| atom | x             | y             | z             |
| H25  | 0.8725858787  | 2.1919439159  | -4.0734749107 |
| C1   | 1.4647532381  | 2.1636710497  | -3.1799266399 |
| C2   | 3.0426007357  | 2.1088784674  | -0.8290102703 |
| C3   | 1.1891914498  | 1.2452586589  | -2.1745715680 |
| C4   | 2.5201854214  | 3.0356716476  | -3.0042315667 |
| C5   | 3.3044980681  | 3.0070775224  | -1.8439280798 |
| C6   | 1.9860040607  | 1.2422188678  | -1.0196000372 |
| C7   | 0.1801972233  | 0.1933284036  | -2.0176631286 |
| H27  | 2.7480087537  | 3.7501643608  | -3.7698669984 |
| H28  | 4.1133200966  | 3.7006202214  | -1.7404504022 |
| H30  | 3.6115424321  | 2.0678830004  | 0.0744652805  |
| C8   | 0.4112311018  | -0.3864105783 | -0.8308500409 |
| H32  | -0.5892372452 | -0.0511779959 | -2.7155036103 |
| C10  | -0.1117151010 | -1.4869252063 | 0.0585790388  |
| N2   | 1.4935762550  | 0.2390943274  | -0.2085050305 |
| C9   | 1.8547419124  | -0.2890747350 | 1.0031248101  |
| O1   | 2.7319757970  | 0.1417439421  | 1.7193974832  |
| H43  | -0.0800662711 | -2.4311060060 | -0.4665759979 |
| C12  | -1.5401625422 | -1.2486968993 | 0.5151984956  |
| C11  | 0.9497608799  | -1.5129098739 | 1.2298566628  |
| C19  | 0.4142759840  | -1.5251009984 | 2.6731899269  |
| C13  | -3.7123736281 | -2.1267587595 | 1.0875858607  |
| C14  | -3.3026572564 | 0.2213554566  | 1.2480069716  |
| C15  | -4.1631350637 | -0.8548554438 | 1.3885634451  |
| C16  | -2.0031589337 | 0.0265320807  | 0.8100245891  |
| C17  | -2.4077565825 | -2.3195551440 | 0.6521327053  |
| H49  | -4.3729125082 | -2.9646222335 | 1.1829344145  |
| H50  | -3.6417221596 | 1.2096904784  | 1.4766719521  |



|     |               |               |              |
|-----|---------------|---------------|--------------|
| H51 | -5.1707996342 | -0.7021666679 | 1.7216189233 |
| H52 | -1.3483785649 | 0.8654629146  | 0.6918379720 |
| H53 | -2.0713671004 | -3.3084487731 | 0.4135313486 |
| H1  | 1.2552496893  | -1.4547308094 | 3.3524015936 |
| H2  | -0.1307021715 | -2.4487293336 | 2.8721056280 |
| H3  | -0.2552508221 | -0.6904497293 | 2.8577062567 |
| H4  | 1.5894393050  | -2.3805896512 | 1.0834423287 |

nuclear repulsion energy..... 1453.823275600 hartrees

-----

/ end of geometry optimization iteration 5 /

-----

end of program geopt

start of program onee

smallest eigenvalue of S: 1.216E-03

number of canonical orbitals..... 210

end of program onee

start of program probe

end of program probe

start of program grid

number of gridpoints:

| atom     | H25 | C1  | C2  | C3  | C4  | C5  | C6  | C7  |
|----------|-----|-----|-----|-----|-----|-----|-----|-----|
| grid # 1 | 73  | 89  | 87  | 90  | 87  | 87  | 85  | 85  |
| grid # 2 | 106 | 99  | 97  | 98  | 98  | 98  | 89  | 92  |
| grid # 3 | 224 | 183 | 183 | 194 | 182 | 182 | 188 | 183 |
| grid # 4 | 224 | 379 | 380 | 404 | 379 | 379 | 375 | 379 |

number of gridpoints:

| atom     | H27 | H28 | H30 | C8  | H32 | C10 | N2  | C9  |
|----------|-----|-----|-----|-----|-----|-----|-----|-----|
| grid # 1 | 73  | 73  | 73  | 86  | 73  | 82  | 99  | 75  |
| grid # 2 | 106 | 106 | 105 | 91  | 105 | 93  | 109 | 80  |
| grid # 3 | 224 | 224 | 220 | 186 | 223 | 175 | 225 | 163 |
| grid # 4 | 224 | 224 | 218 | 376 | 229 | 353 | 401 | 336 |

number of gridpoints:

| atom     | O1  | H43 | C12 | C11 | C19 | C13 | C14 | C15 |
|----------|-----|-----|-----|-----|-----|-----|-----|-----|
| grid # 1 | 111 | 69  | 92  | 80  | 71  | 87  | 87  | 89  |
| grid # 2 | 127 | 97  | 106 | 92  | 75  | 100 | 99  | 100 |
| grid # 3 | 272 | 211 | 192 | 175 | 142 | 182 | 183 | 182 |
| grid # 4 | 476 | 206 | 397 | 360 | 310 | 378 | 375 | 379 |

number of gridpoints:

| atom     | C16 | C17 | H49 | H50 | H51 | H52 | H53 | H1  |
|----------|-----|-----|-----|-----|-----|-----|-----|-----|
| grid # 1 | 86  | 85  | 73  | 73  | 73  | 71  | 72  | 71  |
| grid # 2 | 97  | 99  | 106 | 106 | 106 | 101 | 103 | 99  |
| grid # 3 | 182 | 182 | 224 | 223 | 224 | 213 | 216 | 220 |
| grid # 4 | 376 | 376 | 224 | 223 | 224 | 211 | 215 | 221 |

number of gridpoints:

| atom     | H2  | H3  | H4  | total |
|----------|-----|-----|-----|-------|
| grid # 1 | 72  | 71  | 69  | 2819  |
| grid # 2 | 99  | 97  | 100 | 3481  |
| grid # 3 | 219 | 215 | 218 | 7034  |
| grid # 4 | 223 | 213 | 210 | 10857 |

end of program grid

start of program rwr  
recomputing RWR matrix 8 grid: 4  
recomputing RWR matrix 15 grid: 4  
end of program rwr

start of program scf

|      | i | u | d | i | g |                  |          | RMS     | maximum |
|------|---|---|---|---|---|------------------|----------|---------|---------|
|      | t | p | i | c | r |                  |          | density | DIIS    |
|      | e | d | i | u | i |                  | energy   | change  | error   |
|      | r | t | s | t | d | total energy     | change   |         |         |
| etot | 1 | N | N | 2 | U | -815.12907646171 |          | 4.6E-04 | 1.5E-02 |
| etot | 2 | Y | Y | 6 | M | -815.13899341516 | 9.9E-03  | 1.9E-04 | 6.1E-03 |
| etot | 3 | N | Y | 2 | U | -815.14025250021 | 1.3E-03  | 6.6E-05 | 1.8E-03 |
| etot | 4 | Y | Y | 6 | M | -815.14034107144 | 8.9E-05  | 1.8E-05 | 4.8E-04 |
| etot | 5 | Y | Y | 6 | M | -815.14036054883 | 1.9E-05  | 1.0E-05 | 1.9E-04 |
| etot | 6 | Y | Y | 6 | M | -815.14036035375 | -2.0E-07 | 3.5E-06 | 8.8E-05 |
| etot | 7 | Y | N | 6 | M | -815.14036254175 | 2.2E-06  | 0.0E+00 | 0.0E+00 |

Energy components, in hartrees:

|     |                               |                   |       |
|-----|-------------------------------|-------------------|-------|
| (A) | Nuclear repulsion.....        | 1453.82327560033  |       |
| (E) | Total one-electron terms..... | -3993.20732217510 |       |
| (I) | Total two-electron terms..... | 1724.24368403302  |       |
| (L) | Electronic energy.....        | -2268.96363814208 | (E+I) |
| (N) | Total energy.....             | -815.14036254175  | (A+L) |

SCFE: SCF energy: HF -815.14036254175 hartrees iterations: 7

HOMO energy: -0.29741  
LUMO energy: 0.11824

Orbital energies:

|           |           |           |           |           |           |
|-----------|-----------|-----------|-----------|-----------|-----------|
| -20.45193 | -15.55227 | -11.32106 | -11.23618 | -11.22268 | -11.21488 |
| -11.20950 | -11.19967 | -11.18801 | -11.18618 | -11.18573 | -11.18471 |
| -11.18353 | -11.18276 | -11.17940 | -11.17823 | -11.17676 | -11.17595 |
| -11.17265 | -11.16784 | -1.42174  | -1.33337  | -1.18045  | -1.16245  |
| -1.11321  | -1.08903  | -1.03888  | -1.02665  | -1.01897  | -1.00185  |
| -0.94869  | -0.90441  | -0.85363  | -0.84461  | -0.83092  | -0.81164  |
| -0.79132  | -0.76094  | -0.72109  | -0.68591  | -0.68087  | -0.66883  |
| -0.65739  | -0.64301  | -0.63949  | -0.62490  | -0.61396  | -0.60693  |
| -0.60393  | -0.60072  | -0.59259  | -0.58384  | -0.55339  | -0.54875  |
| -0.53104  | -0.52410  | -0.51633  | -0.51262  | -0.49901  | -0.49501  |
| -0.49027  | -0.48534  | -0.45765  | -0.42128  | -0.39447  | -0.34854  |
| -0.34328  | -0.31535  | -0.29741  | 0.11824   | 0.13359   | 0.13861   |
| 0.14202   | 0.20553   | 0.21993   | 0.26506   | 0.27206   | 0.28096   |
| 0.30644   |           |           |           |           |           |

end of program scf

start of program derla  
end of program derla

```

start of program rwr
recomputing RwR matrix   2      grid:  4
recomputing RwR matrix   8      grid:  4
recomputing RwR matrix  15      grid:  4
end of program rwr

```

```

start of program derlb

```

```

forces (hartrees/bohr) : total

```

| atom  | label | x             | y             | z             |
|-------|-------|---------------|---------------|---------------|
| 1     | H25   | 1.610549E-04  | 1.387182E-04  | 3.655966E-04  |
| 2     | C1    | -5.199381E-04 | -5.772333E-04 | -2.071234E-04 |
| 3     | C2    | 6.420465E-05  | 1.550665E-03  | -1.926293E-03 |
| 4     | C3    | -8.341138E-04 | 1.176940E-03  | -1.377802E-04 |
| 5     | C4    | 2.158482E-03  | 7.688971E-04  | 5.396956E-04  |
| 6     | C5    | -2.302115E-03 | 2.219589E-04  | -4.008076E-04 |
| 7     | C6    | -1.381531E-03 | 5.222113E-05  | -1.093454E-03 |
| 8     | C7    | 1.697058E-04  | -9.989974E-04 | -5.115276E-05 |
| 9     | H27   | 2.042715E-04  | 7.908634E-05  | 4.549655E-05  |
| 10    | H28   | 7.177791E-04  | 3.661620E-04  | -8.436291E-06 |
| 11    | H30   | 7.004748E-04  | -3.017645E-04 | 4.950372E-04  |
| 12    | C8    | 6.345711E-04  | 9.351139E-04  | -4.571445E-04 |
| 13    | H32   | 1.091509E-03  | 1.100508E-04  | 6.060228E-04  |
| 14    | C10   | -1.165806E-03 | -8.402070E-04 | 1.480283E-03  |
| 15    | N2    | -1.760636E-03 | -2.803578E-03 | -2.284888E-03 |
| 16    | C9    | 2.975561E-03  | 1.370084E-03  | 4.080293E-03  |
| 17    | O1    | -3.790249E-03 | -2.331461E-03 | -1.241195E-03 |
| 18    | H43   | 8.327076E-04  | -4.980762E-04 | -8.819169E-04 |
| 19    | C12   | -1.446996E-03 | 1.892659E-03  | -2.393923E-04 |
| 20    | C11   | 1.635663E-03  | 1.525338E-03  | 2.879748E-03  |
| 21    | C19   | -3.224491E-03 | -3.017507E-03 | -7.708463E-04 |
| 22    | C13   | 1.780345E-03  | -5.958838E-04 | -1.011483E-03 |
| 23    | C14   | 2.780770E-03  | -3.019732E-04 | -5.842073E-04 |
| 24    | C15   | 5.920118E-04  | -6.724473E-04 | -2.441611E-04 |
| 25    | C16   | -1.913232E-03 | 8.562396E-04  | 1.906450E-03  |
| 26    | C17   | -3.385241E-03 | -7.572077E-05 | 1.201576E-03  |
| 27    | H49   | 1.628584E-04  | -8.520542E-04 | 1.000642E-05  |
| 28    | H50   | -3.882901E-04 | 1.734599E-03  | 4.116707E-05  |
| 29    | H51   | 5.221705E-04  | -4.701179E-05 | -7.074078E-05 |
| 30    | H52   | -3.811876E-05 | 8.341995E-04  | -2.942853E-04 |
| 31    | H53   | 1.828695E-04  | -1.436121E-03 | -6.569234E-05 |
| 32    | H1    | -5.242451E-04 | -2.195692E-04 | -1.475811E-04 |
| 33    | H2    | 3.020365E-03  | 5.070497E-03  | -7.907824E-04 |
| 34    | H3    | 2.791594E-03  | -2.796167E-03 | -1.630458E-03 |
| 35    | H4    | -1.362443E-03 | 1.427401E-03  | 1.176364E-03  |
| total |       | -8.584754E-04 | 1.745059E-03  | 2.879145E-04  |

```

end of program derlb

```

```

start of program geopt   6

```

```

geometry optimization step  6
reading input hessian of dimension 105
  in five columns format
reading input hessian of dimension 105
  in five columns format
reading input hessian of dimension 105

```

in five columns format

energy change: 1.1930E-04 . ( 5.0000E-05 )  
gradient maximum: 5.8653E-03 . ( 4.5000E-04 )  
gradient rms: 1.3405E-03 . ( 3.0000E-04 )  
step size: 0.07098 trust radius: 0.30000  
displacement maximum: 3.7656E-02 . ( 1.8000E-03 )  
displacement rms: 6.3484E-03 . ( 1.2000E-03 )  
predicted energy change: -2.5944E-04 geom step: 7.0978E-02 full step:  
7.0978E-02  
molecular structure not yet converged...

center of mass moved by:

x: -2.4069E-03 y: 1.0945E-03 z: 8.7299E-04

new geometry:

|      | angstroms     |               |               |
|------|---------------|---------------|---------------|
| atom | x             | y             | z             |
| H25  | 0.8758801078  | 2.1810458813  | -4.0820611168 |
| C1   | 1.4635784596  | 2.1564222691  | -3.1845790885 |
| C2   | 3.0268805721  | 2.1164429140  | -0.8278258370 |
| C3   | 1.1886774012  | 1.2359059393  | -2.1815497531 |
| C4   | 2.5112722535  | 3.0379813915  | -3.0023625258 |
| C5   | 3.2855453132  | 3.0184401507  | -1.8377482687 |
| C6   | 1.9783491101  | 1.2396186807  | -1.0222222330 |
| C7   | 0.1926080158  | 0.1714608660  | -2.0290907633 |
| H27  | 2.7396605924  | 3.7533880742  | -3.7675426970 |
| H28  | 4.0926999356  | 3.7163185613  | -1.7299614418 |
| H30  | 3.5964598534  | 2.0758280604  | 0.0779377238  |
| C8   | 0.4181531302  | -0.4008272740 | -0.8365471394 |
| H32  | -0.5697214295 | -0.0819384196 | -2.7313763810 |
| C10  | -0.1060508443 | -1.4970424321 | 0.0585286919  |
| N2   | 1.4902062594  | 0.2347076117  | -0.2094677845 |
| C9   | 1.8477129459  | -0.2845063594 | 1.0080176946  |
| O1   | 2.7128768506  | 0.1576228506  | 1.7321840757  |
| H43  | -0.0715355561 | -2.4449167088 | -0.4647775325 |
| C12  | -1.5343205576 | -1.2491689979 | 0.5142958678  |
| C11  | 0.9535668004  | -1.5147854130 | 1.2325984000  |
| C19  | 0.4129787609  | -1.5373199431 | 2.6708491312  |
| C13  | -3.7092800186 | -2.1154096201 | 1.0816391871  |
| C14  | -3.2835451798 | 0.2302566369  | 1.2554120597  |
| C15  | -4.1496887156 | -0.8413224598 | 1.3893100143  |
| C16  | -1.9862278694 | 0.0288298775  | 0.8173554369  |
| C17  | -2.4077915440 | -2.3158767158 | 0.6455873276  |
| H49  | -4.3749200255 | -2.9506193107 | 1.1742918493  |
| H50  | -3.6184940671 | 1.2215849771  | 1.4862343425  |
| H51  | -5.1567285219 | -0.6832698430 | 1.7233334500  |
| H52  | -1.3253373824 | 0.8634058794  | 0.6993402199  |
| H53  | -2.0767620214 | -3.3075959833 | 0.4031999203  |
| H1   | 1.2425144604  | -1.4987425721 | 3.3569941373  |
| H2   | -0.1538337162 | -2.4357160437 | 2.8580820614  |
| H3   | -0.2262147529 | -0.6908840898 | 2.8560682307  |
| H4   | 1.5971520379  | -2.3813047062 | 1.0879008745  |

nuclear repulsion energy..... 1454.627415472 hartrees

/ end of geometry optimization iteration 6 /

end of program geopt

```

start of program onee
smallest eigenvalue of S:    1.212E-03
number of canonical orbitals.....    210
end of program onee

```

```

start of program probe
end of program probe

```

```

start of program grid

```

```

number of gridpoints:

```

| atom     | H25 | C1  | C2  | C3  | C4  | C5  | C6  | C7  |
|----------|-----|-----|-----|-----|-----|-----|-----|-----|
| grid # 1 | 73  | 89  | 87  | 90  | 87  | 87  | 85  | 85  |
| grid # 2 | 106 | 100 | 97  | 98  | 98  | 98  | 90  | 92  |
| grid # 3 | 224 | 183 | 182 | 194 | 182 | 182 | 187 | 183 |
| grid # 4 | 224 | 380 | 381 | 404 | 379 | 379 | 375 | 379 |

```

number of gridpoints:

```

| atom     | H27 | H28 | H30 | C8  | H32 | C10 | N2  | C9  |
|----------|-----|-----|-----|-----|-----|-----|-----|-----|
| grid # 1 | 73  | 73  | 73  | 86  | 73  | 82  | 100 | 75  |
| grid # 2 | 106 | 106 | 105 | 91  | 105 | 93  | 109 | 80  |
| grid # 3 | 224 | 224 | 220 | 186 | 223 | 175 | 224 | 163 |
| grid # 4 | 224 | 224 | 218 | 374 | 229 | 353 | 401 | 335 |

```

number of gridpoints:

```

| atom     | O1  | H43 | C12 | C11 | C19 | C13 | C14 | C15 |
|----------|-----|-----|-----|-----|-----|-----|-----|-----|
| grid # 1 | 111 | 69  | 90  | 80  | 71  | 87  | 87  | 89  |
| grid # 2 | 127 | 98  | 106 | 92  | 74  | 100 | 99  | 100 |
| grid # 3 | 272 | 210 | 192 | 175 | 139 | 182 | 183 | 182 |
| grid # 4 | 476 | 205 | 397 | 359 | 307 | 379 | 379 | 379 |

```

number of gridpoints:

```

| atom     | C16 | C17 | H49 | H50 | H51 | H52 | H53 | H1  |
|----------|-----|-----|-----|-----|-----|-----|-----|-----|
| grid # 1 | 86  | 85  | 73  | 73  | 73  | 71  | 72  | 71  |
| grid # 2 | 97  | 99  | 106 | 106 | 106 | 101 | 103 | 99  |
| grid # 3 | 181 | 182 | 224 | 223 | 224 | 213 | 216 | 220 |
| grid # 4 | 376 | 378 | 224 | 223 | 224 | 211 | 215 | 221 |

```

number of gridpoints:

```

| atom     | H2  | H3  | H4  | total |
|----------|-----|-----|-----|-------|
| grid # 1 | 72  | 71  | 69  | 2818  |
| grid # 2 | 99  | 98  | 100 | 3484  |
| grid # 3 | 219 | 215 | 218 | 7026  |
| grid # 4 | 218 | 214 | 214 | 10858 |

```

end of program grid

```

```

start of program rwr
recomputing RwR matrix 15    grid: 4
end of program rwr

```

```

start of program scf

```

| i | u | d | i | g |              |               |                                          |
|---|---|---|---|---|--------------|---------------|------------------------------------------|
| t | p | i | c | r |              |               |                                          |
| e | d | i | u | i |              |               |                                          |
| r | t | s | t | d | total energy | energy change | RMS density change<br>maximum DIIS error |

|      |   |   |   |   |   |                  |          |         |         |
|------|---|---|---|---|---|------------------|----------|---------|---------|
| etot | 1 | N | N | 2 | U | -815.13959330036 |          | 1.6E-04 | 3.1E-03 |
| etot | 2 | Y | Y | 6 | M | -815.14056922901 | 9.8E-04  | 5.7E-05 | 1.2E-03 |
| etot | 3 | Y | Y | 6 | M | -815.14066740204 | 9.8E-05  | 1.8E-05 | 4.0E-04 |
| etot | 4 | Y | Y | 6 | M | -815.14067546782 | 8.1E-06  | 7.5E-06 | 1.5E-04 |
| etot | 5 | Y | Y | 6 | M | -815.14067519538 | -2.7E-07 | 2.2E-06 | 4.0E-05 |
| etot | 6 | N | N | 2 | U | -815.14065358156 | -2.2E-05 | 0.0E+00 | 0.0E+00 |

Energy components, in hartrees:

|     |                               |                   |       |
|-----|-------------------------------|-------------------|-------|
| (A) | Nuclear repulsion.....        | 1454.62741547179  |       |
| (E) | Total one-electron terms..... | -3994.80829153250 |       |
| (I) | Total two-electron terms..... | 1725.04022247915  |       |
| (L) | Electronic energy.....        | -2269.76806905335 | (E+I) |
| (N) | Total energy.....             | -815.14065358156  | (A+L) |

SCFE: SCF energy: HF      -815.14065358156 hartrees      iterations:      6

HOMO energy:      -0.29733  
LUMO energy:      0.11829

Orbital energies:

|           |           |           |           |           |           |
|-----------|-----------|-----------|-----------|-----------|-----------|
| -20.45222 | -15.55244 | -11.32126 | -11.23626 | -11.22260 | -11.21524 |
| -11.20913 | -11.19984 | -11.18800 | -11.18615 | -11.18569 | -11.18482 |
| -11.18344 | -11.18292 | -11.17952 | -11.17813 | -11.17669 | -11.17564 |
| -11.17258 | -11.16453 | -1.42167  | -1.33358  | -1.18064  | -1.16272  |
| -1.11345  | -1.08883  | -1.03878  | -1.02713  | -1.01954  | -1.00186  |
| -0.94932  | -0.90490  | -0.85391  | -0.84455  | -0.83088  | -0.81151  |
| -0.79133  | -0.76090  | -0.72121  | -0.68602  | -0.68094  | -0.66868  |
| -0.65731  | -0.64317  | -0.63929  | -0.62512  | -0.61357  | -0.60726  |
| -0.60421  | -0.60108  | -0.59221  | -0.58399  | -0.55365  | -0.54912  |
| -0.53281  | -0.52469  | -0.51664  | -0.51241  | -0.49895  | -0.49498  |
| -0.49004  | -0.48551  | -0.45774  | -0.42159  | -0.39431  | -0.34901  |
| -0.34311  | -0.31540  | -0.29733  | 0.11829   | 0.13335   | 0.13906   |
| 0.14200   | 0.20568   | 0.22007   | 0.26468   | 0.27174   | 0.28093   |
| 0.30705   |           |           |           |           |           |

end of program scf

start of program derla  
end of program derla

start of program rwr  
recomputing RWR matrix 15      grid: 4  
end of program rwr

start of program derlb

forces (hartrees/bohr) : total

| atom | label | x             | y             | z             |
|------|-------|---------------|---------------|---------------|
| ---- | ----- | -----         | -----         | -----         |
| 1    | H25   | 6.242294E-04  | -2.393983E-06 | 7.371625E-04  |
| 2    | C1    | -1.262006E-04 | 5.122522E-05  | -4.342059E-04 |
| 3    | C2    | 5.197442E-04  | -1.597181E-04 | 1.352066E-03  |
| 4    | C3    | -2.746153E-04 | -2.310974E-04 | 6.312942E-04  |
| 5    | C4    | 2.179673E-04  | 8.164083E-04  | -9.618337E-04 |
| 6    | C5    | 4.647529E-04  | 8.556599E-04  | -5.924191E-04 |

|       |     |               |               |               |
|-------|-----|---------------|---------------|---------------|
| 7     | C6  | -9.372527E-05 | 1.458043E-03  | -1.162963E-04 |
| 8     | C7  | -5.344341E-04 | -9.139478E-04 | 1.286034E-03  |
| 9     | H27 | -1.429755E-04 | -1.426416E-04 | 1.610712E-04  |
| 10    | H28 | -6.251118E-04 | -3.575221E-04 | -1.323583E-04 |
| 11    | H30 | -5.018717E-04 | 4.804563E-05  | -6.634466E-04 |
| 12    | C8  | 2.337373E-04  | 8.588311E-04  | -1.550361E-03 |
| 13    | H32 | 9.607872E-04  | 1.698987E-05  | 6.460219E-04  |
| 14    | C10 | -8.759897E-04 | -1.096061E-03 | 3.574011E-04  |
| 15    | N2  | -4.704903E-04 | -1.557480E-03 | -2.563149E-03 |
| 16    | C9  | 2.920720E-03  | 1.310811E-03  | 4.743945E-03  |
| 17    | O1  | -3.702990E-03 | -2.482970E-03 | -2.012557E-03 |
| 18    | H43 | 1.488482E-05  | 7.973514E-04  | 5.317373E-04  |
| 19    | C12 | 3.652128E-05  | 1.136742E-03  | -4.182061E-04 |
| 20    | C11 | 1.978979E-03  | -1.562089E-03 | 1.381472E-03  |
| 21    | C19 | 3.326708E-04  | 5.608830E-04  | -4.015796E-03 |
| 22    | C13 | 3.986355E-04  | -1.070369E-03 | -3.516975E-04 |
| 23    | C14 | 2.070954E-03  | 1.233866E-03  | -4.510410E-04 |
| 24    | C15 | -1.060880E-03 | -1.097222E-03 | 2.195759E-04  |
| 25    | C16 | -8.909418E-04 | 1.691476E-04  | 6.490318E-04  |
| 26    | C17 | -1.984796E-03 | -6.758543E-04 | 7.177752E-04  |
| 27    | H49 | 2.160970E-04  | -9.038756E-05 | -2.687023E-05 |
| 28    | H50 | 1.332503E-04  | 3.107469E-04  | -3.869171E-05 |
| 29    | H51 | 7.917418E-04  | -1.557635E-04 | -1.963101E-04 |
| 30    | H52 | -1.398933E-04 | 6.125469E-04  | -1.309709E-05 |
| 31    | H53 | -2.128029E-04 | -7.064469E-05 | 1.123810E-04  |
| 32    | H1  | 3.603672E-03  | 4.149605E-04  | 1.933533E-03  |
| 33    | H2  | -1.278009E-03 | -2.337257E-03 | -3.774310E-04 |
| 34    | H3  | -1.697816E-03 | 2.112647E-03  | 3.237520E-04  |
| 35    | H4  | -1.256837E-03 | 2.405223E-03  | 6.290650E-04  |
| ----- |     | -----         | -----         | -----         |
| total |     | -3.510350E-04 | 1.166708E-03  | 1.497551E-03  |

end of program derlb

start of program geopt 7

geometry optimization step 7

reading input hessian of dimension 105  
in five columns format  
reading input hessian of dimension 105  
in five columns format

energy change: -2.9104E-04 . ( 5.0000E-05 )  
gradient maximum: 4.8069E-03 . ( 4.5000E-04 )  
gradient rms: 1.0251E-03 . ( 3.0000E-04 )  
step size: 0.08272 trust radius: 0.30000  
displacement maximum: 3.8986E-02 . ( 1.8000E-03 )  
displacement rms: 7.3991E-03 . ( 1.2000E-03 )  
predicted energy change: -2.0957E-04 geom step: 8.2724E-02 full step:  
8.2724E-02  
molecular structure not yet converged...

center of mass moved by:

x: 2.5992E-03 y: -6.3545E-03 z: 2.0569E-04

new geometry:

|      | angstroms    |              |               |
|------|--------------|--------------|---------------|
| atom | x            | y            | z             |
| H25  | 0.8505922988 | 2.2045278124 | -4.0596232903 |
| C1   | 1.4456713616 | 2.1720468451 | -3.1692545485 |

|     |               |               |               |
|-----|---------------|---------------|---------------|
| C2  | 3.0326678558  | 2.1097826594  | -0.8332301322 |
| C3  | 1.1813116718  | 1.2419376220  | -2.1720321579 |
| C4  | 2.4936600680  | 3.0540457729  | -2.9921443841 |
| C5  | 3.2776955272  | 3.0237431690  | -1.8358581421 |
| C6  | 1.9831456539  | 1.2334743269  | -1.0229987478 |
| C7  | 0.1920576094  | 0.1720808827  | -2.0191820324 |
| H27 | 2.7132354621  | 3.7763066809  | -3.7533743955 |
| H28 | 4.0858831213  | 3.7198325681  | -1.7308827271 |
| H30 | 3.6138636728  | 2.0576359560  | 0.0631132606  |
| C8  | 0.4231391334  | -0.4058995255 | -0.8330230241 |
| H32 | -0.5719313106 | -0.0771491419 | -2.7168893168 |
| C10 | -0.1070541692 | -1.4988912359 | 0.0639918355  |
| N2  | 1.5037879080  | 0.2179112408  | -0.2150310643 |
| C9  | 1.8550033854  | -0.3005237716 | 1.0072489402  |
| O1  | 2.7241628377  | 0.1221583596  | 1.7284848187  |
| H43 | -0.0724105437 | -2.4468814361 | -0.4582906571 |
| C12 | -1.5366580174 | -1.2441407660 | 0.5148502332  |
| C11 | 0.9529845820  | -1.5170989829 | 1.2374832290  |
| C19 | 0.4137363982  | -1.5284776727 | 2.6698391078  |
| C13 | -3.7076521185 | -2.1100780488 | 1.0832006226  |
| C14 | -3.2825023344 | 0.2417265750  | 1.2316805517  |
| C15 | -4.1460953769 | -0.8317704564 | 1.3737885662  |
| C16 | -1.9873092034 | 0.0375211650  | 0.8027524244  |
| C17 | -2.4084146497 | -2.3129592690 | 0.6565258956  |
| H49 | -4.3718857372 | -2.9447967915 | 1.1835490643  |
| H50 | -3.6214714440 | 1.2361109258  | 1.4463314356  |
| H51 | -5.1534356366 | -0.6701267553 | 1.7015902218  |
| H52 | -1.3283902654 | 0.8722717935  | 0.6734811327  |
| H53 | -2.0740299602 | -3.3070464157 | 0.4270952388  |
| H1  | 1.2503570059  | -1.4511001810 | 3.3580479495  |
| H2  | -0.1301763773 | -2.4420300623 | 2.8693736420  |
| H3  | -0.2517743657 | -0.6932639236 | 2.8356091524  |
| H4  | 1.5864179988  | -2.3851728718 | 1.1020158271  |

nuclear repulsion energy..... 1455.488475538 hartrees

/ end of geometry optimization iteration 7 /

end of program geopt

start of program onee

smallest eigenvalue of S: 1.206E-03

number of canonical orbitals..... 210

end of program onee

start of program probe

end of program probe

start of program grid

number of gridpoints:

| atom     | H25 | C1  | C2  | C3  | C4  | C5  | C6  | C7  |
|----------|-----|-----|-----|-----|-----|-----|-----|-----|
| grid # 1 | 73  | 89  | 87  | 90  | 87  | 87  | 85  | 85  |
| grid # 2 | 106 | 100 | 97  | 98  | 98  | 98  | 91  | 92  |
| grid # 3 | 224 | 183 | 182 | 194 | 182 | 182 | 187 | 182 |
| grid # 4 | 224 | 379 | 379 | 406 | 379 | 379 | 371 | 377 |

number of gridpoints:



|          |     |     |     |     |     |     |     |     |
|----------|-----|-----|-----|-----|-----|-----|-----|-----|
| atom     | H27 | H28 | H30 | C8  | H32 | C10 | N2  | C9  |
| grid # 1 | 73  | 73  | 73  | 86  | 73  | 82  | 99  | 75  |
| grid # 2 | 106 | 106 | 105 | 91  | 105 | 93  | 109 | 80  |
| grid # 3 | 224 | 224 | 220 | 186 | 223 | 175 | 225 | 163 |
| grid # 4 | 224 | 224 | 219 | 372 | 228 | 353 | 402 | 329 |

number of gridpoints:

|          |     |     |     |     |     |     |     |     |
|----------|-----|-----|-----|-----|-----|-----|-----|-----|
| atom     | O1  | H43 | C12 | C11 | C19 | C13 | C14 | C15 |
| grid # 1 | 111 | 69  | 92  | 81  | 71  | 87  | 87  | 88  |
| grid # 2 | 123 | 98  | 106 | 93  | 75  | 100 | 99  | 100 |
| grid # 3 | 272 | 211 | 192 | 174 | 142 | 181 | 182 | 183 |
| grid # 4 | 475 | 204 | 396 | 359 | 309 | 379 | 379 | 379 |

number of gridpoints:

|          |     |     |     |     |     |     |     |     |
|----------|-----|-----|-----|-----|-----|-----|-----|-----|
| atom     | C16 | C17 | H49 | H50 | H51 | H52 | H53 | H1  |
| grid # 1 | 86  | 84  | 73  | 73  | 73  | 71  | 72  | 71  |
| grid # 2 | 96  | 99  | 106 | 106 | 106 | 101 | 103 | 99  |
| grid # 3 | 181 | 181 | 224 | 223 | 224 | 214 | 216 | 220 |
| grid # 4 | 377 | 378 | 224 | 223 | 224 | 211 | 215 | 221 |

number of gridpoints:

|          |     |     |     |       |
|----------|-----|-----|-----|-------|
| atom     | H2  | H3  | H4  | total |
| grid # 1 | 72  | 71  | 69  | 2818  |
| grid # 2 | 98  | 97  | 100 | 3480  |
| grid # 3 | 219 | 215 | 218 | 7028  |
| grid # 4 | 219 | 212 | 210 | 10839 |

end of program grid

start of program rwr

```
recomputing RwR matrix 8      grid: 4
recomputing RwR matrix 15     grid: 4
end of program rwr
```

start of program scf

|      | i | u | d | i | g |                  |          | RMS     | maximum |
|------|---|---|---|---|---|------------------|----------|---------|---------|
|      | t | p | i | c | r |                  |          | density | DIIS    |
|      | e | d | i | u | i |                  | energy   | change  | error   |
|      | r | t | s | t | d | total energy     | change   |         |         |
| etot | 1 | N | N | 2 | U | -815.13916126058 |          | 1.9E-04 | 3.5E-03 |
| etot | 2 | Y | Y | 6 | M | -815.14055849858 | 1.4E-03  | 7.1E-05 | 1.4E-03 |
| etot | 3 | Y | Y | 6 | M | -815.14070071593 | 1.4E-04  | 2.3E-05 | 4.4E-04 |
| etot | 4 | Y | Y | 6 | M | -815.14071839733 | 1.8E-05  | 1.0E-05 | 1.8E-04 |
| etot | 5 | Y | Y | 6 | M | -815.14071512292 | -3.3E-06 | 4.0E-06 | 7.8E-05 |
| etot | 6 | N | N | 2 | U | -815.14066653255 | -4.9E-05 | 0.0E+00 | 0.0E+00 |

Energy components, in hartrees:

```
(A) Nuclear repulsion..... 1455.48847553819
(E) Total one-electron terms..... -3996.51292383122
(I) Total two-electron terms..... 1725.88378176047
(L) Electronic energy..... -2270.62914207075 (E+I)
(N) Total energy..... -815.14066653255 (A+L)
```

SCFE: SCF energy: HF -815.14066653255 hartrees iterations: 6

HOMO energy: -0.29712

LUMO energy: 0.11910

Orbital energies:

|           |           |           |           |           |           |
|-----------|-----------|-----------|-----------|-----------|-----------|
| -20.45264 | -15.55208 | -11.32073 | -11.23544 | -11.22249 | -11.21474 |
| -11.20692 | -11.19984 | -11.18760 | -11.18575 | -11.18520 | -11.18449 |
| -11.18315 | -11.18256 | -11.17923 | -11.17675 | -11.17667 | -11.17547 |
| -11.17250 | -11.16528 | -1.42537  | -1.33454  | -1.18117  | -1.16325  |
| -1.11405  | -1.08873  | -1.03859  | -1.02891  | -1.02008  | -1.00157  |
| -0.94903  | -0.90452  | -0.85369  | -0.84411  | -0.83133  | -0.81158  |
| -0.79193  | -0.76103  | -0.72164  | -0.68697  | -0.68179  | -0.66881  |
| -0.65733  | -0.64411  | -0.63942  | -0.62539  | -0.61377  | -0.60831  |
| -0.60455  | -0.60260  | -0.59186  | -0.58371  | -0.55400  | -0.54953  |
| -0.53268  | -0.52422  | -0.51695  | -0.51280  | -0.49904  | -0.49493  |
| -0.48968  | -0.48516  | -0.45857  | -0.42194  | -0.39418  | -0.35025  |
| -0.34246  | -0.31590  | -0.29712  | 0.11910   | 0.13360   | 0.13909   |
| 0.14243   | 0.20625   | 0.22042   | 0.26472   | 0.27176   | 0.28209   |
| 0.30746   |           |           |           |           |           |

end of program scf

start of program derla  
end of program derla

start of program rwr  
recomputing Rwr matrix 8 grid: 4  
recomputing Rwr matrix 15 grid: 4  
end of program rwr

start of program derlb

forces (hartrees/bohr) : total

| atom | label | x             | y             | z             |
|------|-------|---------------|---------------|---------------|
| 1    | H25   | -2.362318E-04 | -2.132386E-04 | -2.806466E-04 |
| 2    | C1    | -1.226583E-04 | 6.176358E-05  | -4.625988E-04 |
| 3    | C2    | 1.319865E-04  | -3.610784E-04 | 1.173014E-03  |
| 4    | C3    | 4.983991E-04  | -1.047995E-03 | -2.433032E-04 |
| 5    | C4    | -7.689024E-04 | 2.394108E-04  | -6.268629E-04 |
| 6    | C5    | 1.551621E-03  | 5.973486E-04  | -4.575321E-05 |
| 7    | C6    | 5.129845E-04  | 4.994763E-04  | 1.034409E-03  |
| 8    | C7    | -2.081709E-03 | 8.115142E-04  | -1.208331E-03 |
| 9    | H27   | -1.903779E-04 | -1.686588E-04 | 1.747336E-04  |
| 10   | H28   | -2.463294E-04 | 4.148760E-06  | 1.937111E-04  |
| 11   | H30   | 1.773401E-04  | 4.691650E-04  | 1.520724E-04  |
| 12   | C8    | 1.901328E-04  | -1.037259E-03 | -6.542565E-04 |
| 13   | H32   | -9.659943E-04 | -3.494470E-04 | -6.609230E-04 |
| 14   | C10   | -3.246636E-04 | -6.655255E-04 | -4.124526E-04 |
| 15   | N2    | 7.472318E-04  | 1.582363E-03  | 5.346544E-04  |
| 16   | C9    | -1.398342E-03 | -1.744832E-03 | -1.945884E-03 |
| 17   | O1    | 3.130797E-03  | 2.997075E-03  | 3.172939E-03  |
| 18   | H43   | -3.853396E-04 | 4.363201E-04  | 4.964129E-04  |
| 19   | C12   | 1.750490E-03  | -8.030674E-04 | -6.562082E-04 |
| 20   | C11   | -1.301618E-03 | -6.448383E-04 | -7.233143E-04 |
| 21   | C19   | 1.015582E-03  | 1.969058E-03  | 1.882940E-03  |
| 22   | C13   | -1.658435E-03 | 1.578417E-04  | 8.769960E-04  |
| 23   | C14   | -1.956631E-03 | 1.005860E-03  | 6.390548E-04  |
| 24   | C15   | -2.571830E-03 | 1.569391E-04  | 7.471176E-04  |
| 25   | C16   | 2.187562E-03  | -5.123739E-04 | -1.182526E-03 |

|       |       |               |               |               |
|-------|-------|---------------|---------------|---------------|
| 26    | C17   | 2.391953E-03  | -2.246457E-04 | -8.740877E-04 |
| 27    | H49   | -4.031671E-04 | -4.805240E-05 | 1.134502E-04  |
| 28    | H50   | 3.667200E-05  | -4.104785E-04 | 1.826655E-04  |
| 29    | H51   | -1.358038E-04 | -1.743317E-06 | 7.698322E-05  |
| 30    | H52   | 1.126712E-04  | 1.476414E-04  | 9.892803E-05  |
| 31    | H53   | -3.314863E-05 | 3.327849E-04  | 3.045347E-05  |
| 32    | H1    | -1.884112E-03 | -4.456033E-04 | -1.405665E-03 |
| 33    | H2    | 4.131727E-05  | -1.523113E-04 | 2.862021E-04  |
| 34    | H3    | 1.822935E-04  | -3.634442E-04 | 8.143398E-04  |
| 35    | H4    | 1.181780E-03  | -8.754076E-04 | -4.985469E-04 |
| ----- |       |               |               |               |
|       | total | -8.244798E-04 | 1.398710E-03  | 7.997182E-04  |

end of program derlb

start of program geopt 8

geometry optimization step 8

reading input hessian of dimension 105  
in five columns format

reading input hessian of dimension 105  
in five columns format

reading input hessian of dimension 105  
in five columns format

energy change: -1.2951E-05 \* ( 5.0000E-05 )

gradient maximum: 5.1668E-03 . ( 4.5000E-04 )

gradient rms: 1.0215E-03 . ( 3.0000E-04 )

step size: 0.22897 trust radius: 0.30000

displacement maximum: 9.3501E-02 . ( 1.8000E-03 )

displacement rms: 2.0480E-02 . ( 1.2000E-03 )

predicted energy change: -3.3182E-04 geom step: 2.2897E-01 full step:  
2.2897E-01

molecular structure not yet converged...

center of mass moved by:

x: -1.4102E-02 y: 1.5813E-02 z: 3.8822E-03

new geometry:

|      | angstroms     |               |               |
|------|---------------|---------------|---------------|
| atom | x             | y             | z             |
| H25  | 0.9071867646  | 2.1019281546  | -4.1180847885 |
| C1   | 1.4681925676  | 2.1093005143  | -3.2047209945 |
| C2   | 2.9677440872  | 2.1497885388  | -0.8007496107 |
| C3   | 1.2000215554  | 1.1869375532  | -2.1999852224 |
| C4   | 2.4741425867  | 3.0359422954  | -3.0013326134 |
| C5   | 3.2165828604  | 3.0555978341  | -1.8108267913 |
| C6   | 1.9578305888  | 1.2331167688  | -1.0206174051 |
| C7   | 0.2395856723  | 0.0827610727  | -2.0660086857 |
| H27  | 2.6932173460  | 3.7518777665  | -3.7641986354 |
| H28  | 3.9907811377  | 3.7840016745  | -1.6838352421 |
| H30  | 3.5124673976  | 2.1349949824  | 0.1194662453  |
| C8   | 0.4506042369  | -0.4623071633 | -0.8631077281 |
| H32  | -0.4919333774 | -0.2060733984 | -2.7851918696 |
| C10  | -0.0889804845 | -1.5365949291 | 0.0554663440  |
| N2   | 1.4866559914  | 0.2108749646  | -0.2185659597 |
| C9   | 1.8118980138  | -0.2567260162 | 1.0349557281  |
| O1   | 2.6188173285  | 0.2407146403  | 1.7984113410  |
| H43  | -0.0692233008 | -2.4931127314 | -0.4394347340 |
| C12  | -1.5162518513 | -1.2459479061 | 0.5042901392  |

|     |               |               |              |
|-----|---------------|---------------|--------------|
| C11 | 0.9751621867  | -1.5314828452 | 1.2288084415 |
| C19 | 0.4387470415  | -1.6285861162 | 2.6669849118 |
| C13 | -3.7135069037 | -2.0529457707 | 1.0669287797 |
| C14 | -3.2099441388 | 0.2819792404  | 1.2571134672 |
| C15 | -4.1082087682 | -0.7671132162 | 1.3852978872 |
| C16 | -1.9252803112 | 0.0442417635  | 0.8163805187 |
| C17 | -2.4230137789 | -2.2879141950 | 0.6301925504 |
| H49 | -4.4019836081 | -2.8660892274 | 1.1533353126 |
| H50 | -3.5140532514 | 1.2807494266  | 1.4931292113 |
| H51 | -5.1048610983 | -0.5784016333 | 1.7228735702 |
| H52 | -1.2444287045 | 0.8595506966  | 0.6967621544 |
| H53 | -2.1236926819 | -3.2864804061 | 0.3802968513 |
| H1  | 1.2793417824  | -1.5469747574 | 3.3471422402 |
| H2  | -0.0611089163 | -2.5799380301 | 2.8263667835 |
| H3  | -0.2643804927 | -0.8294043816 | 2.8807517166 |
| H4  | 1.6612462396  | -2.3554408593 | 1.0580410281 |

nuclear repulsion energy..... 1456.043748144 hartrees

/ end of geometry optimization iteration 8 /

end of program geopt

start of program onee  
smallest eigenvalue of S: 1.228E-03  
number of canonical orbitals..... 210  
end of program onee

start of program probe  
end of program probe

start of program grid

number of gridpoints:

|          |     |     |     |     |     |     |     |     |
|----------|-----|-----|-----|-----|-----|-----|-----|-----|
| atom     | H25 | C1  | C2  | C3  | C4  | C5  | C6  | C7  |
| grid # 1 | 73  | 89  | 87  | 90  | 87  | 87  | 84  | 85  |
| grid # 2 | 106 | 100 | 97  | 98  | 99  | 99  | 90  | 92  |
| grid # 3 | 224 | 183 | 184 | 195 | 182 | 182 | 187 | 182 |
| grid # 4 | 224 | 379 | 380 | 408 | 377 | 379 | 373 | 378 |

number of gridpoints:

|          |     |     |     |     |     |     |     |     |
|----------|-----|-----|-----|-----|-----|-----|-----|-----|
| atom     | H27 | H28 | H30 | C8  | H32 | C10 | N2  | C9  |
| grid # 1 | 73  | 73  | 73  | 86  | 73  | 82  | 99  | 76  |
| grid # 2 | 106 | 106 | 105 | 92  | 106 | 93  | 109 | 80  |
| grid # 3 | 224 | 224 | 220 | 187 | 223 | 175 | 224 | 164 |
| grid # 4 | 224 | 224 | 217 | 373 | 229 | 353 | 400 | 335 |

number of gridpoints:

|          |     |     |     |     |     |     |     |     |
|----------|-----|-----|-----|-----|-----|-----|-----|-----|
| atom     | O1  | H43 | C12 | C11 | C19 | C13 | C14 | C15 |
| grid # 1 | 111 | 69  | 92  | 81  | 71  | 87  | 86  | 88  |
| grid # 2 | 127 | 98  | 106 | 93  | 76  | 100 | 98  | 100 |
| grid # 3 | 272 | 210 | 192 | 174 | 150 | 181 | 182 | 182 |
| grid # 4 | 476 | 205 | 397 | 359 | 307 | 375 | 378 | 376 |

number of gridpoints:

|          |     |     |     |     |     |     |     |    |
|----------|-----|-----|-----|-----|-----|-----|-----|----|
| atom     | C16 | C17 | H49 | H50 | H51 | H52 | H53 | H1 |
| grid # 1 | 86  | 84  | 73  | 73  | 73  | 71  | 72  | 71 |
| grid # 2 | 96  | 98  | 106 | 106 | 106 | 100 | 103 | 99 |

|          |     |     |     |     |     |     |     |     |
|----------|-----|-----|-----|-----|-----|-----|-----|-----|
| grid # 3 | 181 | 182 | 224 | 223 | 224 | 215 | 216 | 220 |
| grid # 4 | 374 | 378 | 224 | 223 | 224 | 211 | 215 | 221 |

number of gridpoints:

|          |     |     |     |       |
|----------|-----|-----|-----|-------|
| atom     | H2  | H3  | H4  | total |
| grid # 1 | 72  | 71  | 69  | 2817  |
| grid # 2 | 99  | 97  | 100 | 3486  |
| grid # 3 | 219 | 215 | 218 | 7040  |
| grid # 4 | 219 | 212 | 211 | 10838 |

end of program grid

start of program rwr

|                        |    |       |   |
|------------------------|----|-------|---|
| recomputing Rwr matrix | 8  | grid: | 4 |
| recomputing Rwr matrix | 15 | grid: | 4 |

end of program rwr

start of program scf

|      | i | u | d | i | g |                  |          | RMS     | maximum |
|------|---|---|---|---|---|------------------|----------|---------|---------|
|      | t | p | i | c | r |                  |          | density | DIIS    |
|      | e | d | i | u | i |                  | energy   | change  | error   |
|      | r | t | s | t | d | total energy     | change   |         |         |
| etot | 1 | N | N | 2 | U | -815.11828010280 |          | 6.2E-04 | 1.8E-02 |
| etot | 2 | Y | Y | 6 | M | -815.13771483113 | 1.9E-02  | 2.6E-04 | 7.4E-03 |
| etot | 3 | N | Y | 2 | U | -815.14019194804 | 2.5E-03  | 8.7E-05 | 2.3E-03 |
| etot | 4 | Y | Y | 6 | M | -815.14034964728 | 1.6E-04  | 2.2E-05 | 5.6E-04 |
| etot | 5 | Y | Y | 6 | M | -815.14037543149 | 2.6E-05  | 1.3E-05 | 2.1E-04 |
| etot | 6 | Y | Y | 6 | M | -815.14037485600 | -5.8E-07 | 4.3E-06 | 7.8E-05 |
| etot | 7 | Y | N | 6 | M | -815.14037782599 | 3.0E-06  | 0.0E+00 | 0.0E+00 |

Energy components, in hartrees:

|     |                               |                   |       |
|-----|-------------------------------|-------------------|-------|
| (A) | Nuclear repulsion.....        | 1456.04374814385  |       |
| (E) | Total one-electron terms..... | -3997.66001909393 |       |
| (I) | Total two-electron terms..... | 1726.47589312410  |       |
| (L) | Electronic energy.....        | -2271.18412596984 | (E+I) |
| (N) | Total energy.....             | -815.14037782599  | (A+L) |

SCFE: SCF energy: HF      -815.14037782599 hartrees      iterations:      7

HOMO energy:      -0.29796  
LUMO energy:      0.11802

Orbital energies:

|           |           |           |           |           |           |
|-----------|-----------|-----------|-----------|-----------|-----------|
| -20.45387 | -15.55279 | -11.32287 | -11.23593 | -11.22266 | -11.21536 |
| -11.20904 | -11.20011 | -11.18829 | -11.18547 | -11.18473 | -11.18413 |
| -11.18287 | -11.18216 | -11.17983 | -11.17787 | -11.17711 | -11.17635 |
| -11.17298 | -11.16655 | -1.41838  | -1.33342  | -1.18046  | -1.16208  |
| -1.11243  | -1.08876  | -1.03772  | -1.02894  | -1.01841  | -1.00180  |
| -0.94819  | -0.90470  | -0.85195  | -0.84400  | -0.83121  | -0.81207  |
| -0.79180  | -0.76026  | -0.72219  | -0.68606  | -0.68086  | -0.66788  |
| -0.65636  | -0.64267  | -0.64010  | -0.62475  | -0.61327  | -0.60713  |
| -0.60433  | -0.60264  | -0.59228  | -0.58293  | -0.55121  | -0.54925  |
| -0.53181  | -0.52421  | -0.51694  | -0.51239  | -0.49920  | -0.49460  |
| -0.48878  | -0.48497  | -0.45796  | -0.42201  | -0.39435  | -0.35013  |
| -0.34226  | -0.31506  | -0.29796  | 0.11802   | 0.13231   | 0.14018   |
| 0.14269   | 0.20385   | 0.22135   | 0.26578   | 0.27234   | 0.28138   |

0.30586

end of program scf

start of program derla

end of program derla

start of program rwr

recomputing RwR matrix 8 grid: 4

recomputing RwR matrix 15 grid: 4

end of program rwr

start of program derlb

forces (hartrees/bohr) : total

| atom  | label | x             | y             | z             |
|-------|-------|---------------|---------------|---------------|
| 1     | H25   | 1.841171E-04  | 9.685182E-05  | -3.961196E-05 |
| 2     | C1    | 8.758269E-04  | 4.764937E-04  | 9.461125E-04  |
| 3     | C2    | -1.555725E-03 | -3.722300E-05 | -1.735444E-03 |
| 4     | C3    | 6.713278E-04  | 5.351658E-04  | -1.776705E-03 |
| 5     | C4    | 1.678627E-04  | -2.234414E-03 | 4.000651E-03  |
| 6     | C5    | -1.708607E-03 | -4.255747E-04 | -2.626105E-03 |
| 7     | C6    | -1.310706E-03 | -1.488211E-03 | -9.069032E-04 |
| 8     | C7    | 7.193123E-04  | 3.188106E-03  | -2.312803E-03 |
| 9     | H27   | 5.993744E-04  | 1.533616E-03  | -1.346753E-03 |
| 10    | H28   | 3.377900E-04  | 8.279419E-04  | -4.638826E-04 |
| 11    | H30   | -1.123245E-04 | 2.545567E-04  | 1.712792E-04  |
| 12    | C8    | -2.875061E-04 | -3.545378E-03 | 3.912930E-03  |
| 13    | H32   | 3.391624E-05  | 3.090086E-04  | 7.884368E-05  |
| 14    | C10   | 7.436448E-04  | 3.714275E-03  | 1.235824E-03  |
| 15    | N2    | 3.938310E-03  | 3.604811E-03  | 6.490407E-03  |
| 16    | C9    | 4.545228E-03  | 2.371708E-03  | 5.075382E-03  |
| 17    | O1    | -1.001724E-02 | -5.506987E-03 | -1.056373E-02 |
| 18    | H43   | -3.554645E-05 | -2.929869E-03 | -1.205119E-03 |
| 19    | C12   | 2.742592E-03  | -1.448209E-03 | 4.510851E-04  |
| 20    | C11   | -3.117888E-03 | 8.051949E-04  | 4.111657E-03  |
| 21    | C19   | -1.088031E-04 | 6.881283E-04  | -1.290269E-03 |
| 22    | C13   | -5.126589E-04 | 2.652491E-03  | 6.583254E-04  |
| 23    | C14   | -2.645677E-03 | -1.433389E-03 | 4.921983E-04  |
| 24    | C15   | -3.484725E-05 | 9.276068E-04  | 6.696387E-05  |
| 25    | C16   | 1.384955E-03  | -1.650478E-03 | -1.314249E-03 |
| 26    | C17   | 3.454314E-03  | 3.789442E-04  | -1.186983E-03 |
| 27    | H49   | -1.611915E-03 | -1.452210E-03 | 3.436331E-04  |
| 28    | H50   | -5.201623E-04 | 8.740562E-04  | 3.739374E-04  |
| 29    | H51   | -1.970359E-03 | 2.383120E-04  | 6.551981E-04  |
| 30    | H52   | 1.622118E-03  | 1.451065E-03  | 1.479797E-04  |
| 31    | H53   | 5.552732E-04  | -8.158356E-04 | -7.188324E-05 |
| 32    | H1    | -1.640405E-03 | -2.747552E-04 | 1.731209E-04  |
| 33    | H2    | 1.348510E-03  | 2.708392E-03  | -1.223504E-04 |
| 34    | H3    | 2.740504E-03  | -3.013180E-03 | -1.148156E-03 |
| 35    | H4    | -2.612877E-04 | -6.829678E-05 | -2.063461E-04 |
| total |       | -7.866891E-04 | 1.312713E-03  | 1.068237E-03  |

end of program derlb

start of program geopt 9

geometry optimization step 9

reading input hessian of dimension 105  
in five columns format  
reading input hessian of dimension 105  
in five columns format  
reading input hessian of dimension 105  
in five columns format

energy change: 2.8871E-04 . ( 5.0000E-05 )  
gradient maximum: 1.5564E-02 . ( 4.5000E-04 )  
gradient rms: 2.0457E-03 . ( 3.0000E-04 )  
step size: 0.17911 trust radius: 0.30000  
displacement maximum: 7.6122E-02 . ( 1.8000E-03 )  
displacement rms: 1.6020E-02 . ( 1.2000E-03 )  
predicted energy change: -6.9150E-04 geom step: 1.7911E-01 full step:

1.7911E-01

molecular structure not yet converged...

center of mass moved by:

x: -1.1515E-02 y: 1.3339E-02 z: 6.4557E-03

new geometry:

|      | angstroms     |               |               |
|------|---------------|---------------|---------------|
| atom | x             | y             | z             |
| H25  | 0.9854086380  | 2.0207486693  | -4.1692767745 |
| C1   | 1.5151720192  | 2.0609155825  | -3.2371774704 |
| C2   | 2.9236455825  | 2.1887108181  | -0.7858762307 |
| C3   | 1.2231581786  | 1.1636294646  | -2.2167251284 |
| C4   | 2.4981481077  | 3.0035528328  | -3.0276774059 |
| C5   | 3.2002134183  | 3.0644852326  | -1.8188159854 |
| C6   | 1.9365560815  | 1.2524364386  | -1.0101221723 |
| C7   | 0.2659330805  | 0.0609801861  | -2.0851292275 |
| H27  | 2.7339598606  | 3.7050942661  | -3.8054733646 |
| H28  | 3.9566863749  | 3.8120581167  | -1.6898498501 |
| H30  | 3.4308488302  | 2.2169615239  | 0.1547584782  |
| C8   | 0.4550894242  | -0.4658475709 | -0.8636725472 |
| H32  | -0.4442594203 | -0.2485766469 | -2.8193024991 |
| C10  | -0.0810926187 | -1.5423609805 | 0.0480174892  |
| N2   | 1.4531709198  | 0.2481760739  | -0.1937840340 |
| C9   | 1.7738660515  | -0.2366468779 | 1.0499993693  |
| O1   | 2.5512325248  | 0.2820494795  | 1.8200814932  |
| H43  | -0.0707903298 | -2.5044992626 | -0.4490730120 |
| C12  | -1.4984835199 | -1.2514213482 | 0.5043416953  |
| C11  | 0.9786200470  | -1.5398631325 | 1.2176761040  |
| C19  | 0.4559551003  | -1.6915920556 | 2.6502581684  |
| C13  | -3.7135694043 | -2.0303464070 | 1.0657639041  |
| C14  | -3.1873948871 | 0.2854252716  | 1.2853809202  |
| C15  | -4.1015690701 | -0.7481161438 | 1.4037065514  |
| C16  | -1.8981584486 | 0.0364994064  | 0.8340384995  |
| C17  | -2.4185840825 | -2.2781975495 | 0.6172021624  |
| H49  | -4.4150545570 | -2.8373401549 | 1.1436899333  |
| H50  | -3.4754318005 | 1.2833070075  | 1.5436111130  |
| H51  | -5.0994948026 | -0.5541903682 | 1.7490896749  |
| H52  | -1.2019502153 | 0.8451372957  | 0.7349102883  |
| H53  | -2.1332280312 | -3.2772937631 | 0.3525224729  |
| H1   | 1.2897563415  | -1.6269682922 | 3.3285480303  |
| H2   | -0.0265174297 | -2.6532600573 | 2.7838484535  |
| H3   | -0.2546075259 | -0.9227759725 | 2.9012273069  |
| H4   | 1.6954156508  | -2.3351017121 | 1.0100509046  |

```

nuclear repulsion energy..... 1457.325387747 hartrees
-----
/  end of geometry optimization iteration    9  /
-----

end of program geopt

start of program onee
smallest eigenvalue of S:    1.219E-03
number of canonical orbitals.....          210
end of program onee

start of program probe
end of program probe

start of program grid

number of gridpoints:
  atom      H25      C1      C2      C3      C4      C5      C6      C7
grid # 1      73      89      87      90      87      87      84      85
grid # 2     106      99      98      98      98      98      89      92
grid # 3     224     183     183     194     182     182     189     183
grid # 4     224     379     381     403     379     380     375     379

number of gridpoints:
  atom      H27      H28      H30      C8      H32      C10      N2      C9
grid # 1      73      73      73      86      73      81      99      75
grid # 2     106     106     105      92     106      93     109      81
grid # 3     224     224     220     189     223     175     222     163
grid # 4     224     224     219     378     229     349     400     329

number of gridpoints:
  atom      O1      H43      C12      C11      C19      C13      C14      C15
grid # 1     111      69      90      80      71      87      86      89
grid # 2     127      98     105      92      75      99      99     100
grid # 3     272     212     192     176     148     182     183     181
grid # 4     476     206     399     361     307     378     378     379

number of gridpoints:
  atom      C16      C17      H49      H50      H51      H52      H53      H1
grid # 1      86      86      73      73      73      71      72      71
grid # 2      98      98     106     106     106     100     103      99
grid # 3     182     181     224     223     224     215     216     220
grid # 4     378     376     224     223     224     211     215     221

number of gridpoints:
  atom      H2      H3      H4  total
grid # 1      72      71      70   2816
grid # 2      99      97     100   3483
grid # 3     219     215     219   7044
grid # 4     220     212     215  10855

end of program grid

start of program rwr
recomputing RwR matrix    8    grid:  4
recomputing RwR matrix   15    grid:  4

```



end of program rwr

start of program scf

|      | i | u | d | i | g |                  | energy   | RMS     | maximum |
|------|---|---|---|---|---|------------------|----------|---------|---------|
|      | t | p | i | c | r |                  | change   | density | DIIS    |
|      | e | d | i | u | i |                  |          | change  | error   |
|      | r | t | s | t | d | total energy     |          |         |         |
| etot | 1 | N | N | 2 | U | -815.13170234446 |          | 4.3E-04 | 1.4E-02 |
| etot | 2 | Y | Y | 6 | M | -815.13972400376 | 8.0E-03  | 1.7E-04 | 5.6E-03 |
| etot | 3 | N | Y | 2 | U | -815.14055391488 | 8.3E-04  | 6.2E-05 | 1.7E-03 |
| etot | 4 | Y | Y | 6 | M | -815.14065382104 | 1.0E-04  | 2.2E-05 | 5.1E-04 |
| etot | 5 | Y | Y | 6 | M | -815.14066553823 | 1.2E-05  | 9.7E-06 | 1.9E-04 |
| etot | 6 | Y | Y | 6 | M | -815.14066682514 | 1.3E-06  | 5.1E-06 | 1.0E-04 |
| etot | 7 | Y | Y | 6 | M | -815.14066931502 | 2.5E-06  | 2.0E-06 | 5.2E-05 |
| etot | 8 | N | N | 2 | U | -815.14065149339 | -1.8E-05 | 0.0E+00 | 0.0E+00 |

Energy components, in hartrees:

|     |                               |                   |       |
|-----|-------------------------------|-------------------|-------|
| (A) | Nuclear repulsion.....        | 1457.32538774698  |       |
| (E) | Total one-electron terms..... | -4000.21518124494 |       |
| (I) | Total two-electron terms..... | 1727.74914200456  |       |
| (L) | Electronic energy.....        | -2272.46603924038 | (E+I) |
| (N) | Total energy.....             | -815.14065149339  | (A+L) |

SCFE: SCF energy: HF      -815.14065149339 hartrees      iterations:      8

HOMO energy:      -0.29678  
LUMO energy:      0.11710

Orbital energies:

|           |           |           |           |           |           |
|-----------|-----------|-----------|-----------|-----------|-----------|
| -20.45302 | -15.55217 | -11.32145 | -11.23636 | -11.22307 | -11.21522 |
| -11.20959 | -11.19913 | -11.18830 | -11.18608 | -11.18561 | -11.18463 |
| -11.18318 | -11.18266 | -11.17922 | -11.17874 | -11.17703 | -11.17612 |
| -11.17250 | -11.16454 | -1.42256  | -1.33294  | -1.18041  | -1.16223  |
| -1.11418  | -1.08807  | -1.03941  | -1.02476  | -1.02022  | -1.00141  |
| -0.94910  | -0.90554  | -0.85298  | -0.84473  | -0.83010  | -0.81131  |
| -0.79097  | -0.76025  | -0.72170  | -0.68612  | -0.68109  | -0.66795  |
| -0.65755  | -0.64255  | -0.64017  | -0.62482  | -0.61415  | -0.60737  |
| -0.60409  | -0.59866  | -0.59320  | -0.58333  | -0.55203  | -0.55032  |
| -0.53258  | -0.52488  | -0.51641  | -0.51316  | -0.49846  | -0.49492  |
| -0.48986  | -0.48557  | -0.45809  | -0.42187  | -0.39454  | -0.34716  |
| -0.34355  | -0.31570  | -0.29678  | 0.11710   | 0.13247   | 0.14071   |
| 0.14346   | 0.20489   | 0.22121   | 0.26515   | 0.27149   | 0.28017   |
| 0.30596   |           |           |           |           |           |

end of program scf

start of program derla  
end of program derla

start of program rwr  
recomputing RwR matrix      8      grid:      4  
recomputing RwR matrix      15      grid:      4  
end of program rwr

start of program derlb

forces (hartrees/bohr) : total

| atom  | label | x             | y             | z             |
|-------|-------|---------------|---------------|---------------|
| 1     | H25   | 2.085293E-04  | -1.046698E-05 | 7.370282E-04  |
| 2     | C1    | -3.011216E-03 | -2.369182E-03 | -4.153569E-04 |
| 3     | C2    | 8.820340E-04  | 2.707386E-03  | -2.934834E-03 |
| 4     | C3    | -5.640292E-04 | 2.073818E-03  | 4.076406E-04  |
| 5     | C4    | 3.319910E-03  | 2.099172E-03  | -1.759108E-04 |
| 6     | C5    | -1.082347E-03 | 6.303644E-04  | 1.609525E-03  |
| 7     | C6    | -1.755569E-03 | -7.349231E-04 | -1.330661E-03 |
| 8     | C7    | 2.102999E-03  | -2.641627E-03 | 2.888564E-03  |
| 9     | H27   | -7.476275E-05 | -9.221204E-04 | 1.134848E-03  |
| 10    | H28   | 3.225140E-04  | -1.070248E-04 | 1.316972E-04  |
| 11    | H30   | 5.809125E-04  | -7.097146E-05 | 1.317981E-04  |
| 12    | C8    | -1.402956E-03 | 3.076145E-03  | -3.032829E-03 |
| 13    | H32   | 1.266553E-03  | 6.751857E-05  | 8.243169E-04  |
| 14    | C10   | 4.795093E-04  | -2.336623E-03 | -5.043974E-04 |
| 15    | N2    | -2.121528E-03 | -4.785538E-03 | -3.802862E-03 |
| 16    | C9    | 2.080575E-03  | 4.491790E-03  | 3.688794E-03  |
| 17    | O1    | -2.288802E-03 | -3.556847E-03 | -1.184714E-03 |
| 18    | H43   | 8.674013E-04  | 1.161676E-03  | 1.489318E-04  |
| 19    | C12   | -2.602619E-03 | 2.614437E-03  | 1.011454E-03  |
| 20    | C11   | 1.663462E-03  | 2.314590E-04  | 8.355147E-04  |
| 21    | C19   | -4.665851E-04 | -4.903428E-03 | -2.631098E-03 |
| 22    | C13   | 2.992048E-03  | -2.832475E-03 | -1.995211E-03 |
| 23    | C14   | 5.820262E-03  | 5.008609E-04  | -1.460642E-03 |
| 24    | C15   | 1.034263E-03  | -9.168821E-04 | -3.721609E-04 |
| 25    | C16   | -4.339708E-03 | 2.932509E-03  | 3.081072E-03  |
| 26    | C17   | -5.979479E-03 | -9.943937E-04 | 2.031374E-03  |
| 27    | H49   | 7.859148E-04  | -6.150844E-04 | -2.153347E-04 |
| 28    | H50   | 2.050302E-04  | 1.461473E-03  | -2.331327E-04 |
| 29    | H51   | 1.605449E-03  | -3.396873E-04 | -5.372033E-04 |
| 30    | H52   | -7.557658E-04 | 6.483084E-04  | 4.919089E-05  |
| 31    | H53   | -3.254942E-04 | -9.582932E-04 | 1.928005E-04  |
| 32    | H1    | 3.237668E-03  | 6.769430E-04  | 3.026972E-03  |
| 33    | H2    | 3.835886E-04  | 6.817858E-04  | -5.918747E-04 |
| 34    | H3    | -1.339432E-03 | 2.559805E-03  | -9.076618E-04 |
| 35    | H4    | -2.454481E-03 | 1.601868E-03  | 1.484388E-03  |
| total |       | -7.261503E-04 | 1.121753E-03  | 1.090027E-03  |

end of program derlb

start of program geopt 10

geometry optimization step 10

reading input hessian of dimension 105  
in five columns format

reading input hessian of dimension 105  
in five columns format

reading input hessian of dimension 105  
in five columns format

energy change: -2.7367E-04 . ( 5.0000E-05 )  
gradient maximum: 6.9580E-03 . ( 4.5000E-04 )  
gradient rms: 1.7238E-03 . ( 3.0000E-04 )  
step size: 0.09722 trust radius: 0.30000

displacement maximum: 5.0420E-02 . ( 1.8000E-03 )  
displacement rms: 8.6955E-03 . ( 1.2000E-03 )  
predicted energy change: -4.5108E-04 geom step: 9.7219E-02 full step:  
9.7219E-02  
molecular structure not yet converged...

center of mass moved by:  
x: 5.6825E-03 y: -8.5801E-03 z: -3.0798E-03

new geometry:

|      | angstroms     |               |               |
|------|---------------|---------------|---------------|
| atom | x             | y             | z             |
| H25  | 0.9418882259  | 2.0515174508  | -4.1466436424 |
| C1   | 1.4838762869  | 2.0796167120  | -3.2211756076 |
| C2   | 2.9306495962  | 2.1794791167  | -0.7919017598 |
| C3   | 1.2080719958  | 1.1704109103  | -2.2092650003 |
| C4   | 2.4733901891  | 3.0218945442  | -3.0105940904 |
| C5   | 3.1906945249  | 3.0717670148  | -1.8098959557 |
| C6   | 1.9395994139  | 1.2426854728  | -1.0140914895 |
| C7   | 0.2607966831  | 0.0588160449  | -2.0779561407 |
| H27  | 2.6994624482  | 3.7309026429  | -3.7820749470 |
| H28  | 3.9523510333  | 3.8151413536  | -1.6804581957 |
| H30  | 3.4561532547  | 2.1910501104  | 0.1409968892  |
| C8   | 0.4536078125  | -0.4699521114 | -0.8607095141 |
| H32  | -0.4537492025 | -0.2476595311 | -2.8078788528 |
| C10  | -0.0821932964 | -1.5441637339 | 0.0556003134  |
| N2   | 1.4669159451  | 0.2289660725  | -0.2017015945 |
| C9   | 1.7921377034  | -0.2531600382 | 1.0415338362  |
| O1   | 2.5935326481  | 0.2403972651  | 1.7975048846  |
| H43  | -0.0688336765 | -2.5054053154 | -0.4406717331 |
| C12  | -1.5018544401 | -1.2470122599 | 0.5121435280  |
| C11  | 0.9769453070  | -1.5406864087 | 1.2267697412  |
| C19  | 0.4538851355  | -1.6691831844 | 2.6609047208  |
| C13  | -3.7136705863 | -2.0280898465 | 1.0550098428  |
| C14  | -3.1858657818 | 0.2969250424  | 1.2700616100  |
| C15  | -4.0984391591 | -0.7399564252 | 1.3815848334  |
| C16  | -1.8982505198 | 0.0460682360  | 0.8349234456  |
| C17  | -2.4201493500 | -2.2782854918 | 0.6231584555  |
| H49  | -4.4151233188 | -2.8350927160 | 1.1309668726  |
| H50  | -3.4784491631 | 1.2985893245  | 1.5156798931  |
| H51  | -5.0984542341 | -0.5430996142 | 1.7136443264  |
| H52  | -1.2020485365 | 0.8542114455  | 0.7337192645  |
| H53  | -2.1310966828 | -3.2797164465 | 0.3671755442  |
| H1   | 1.2840363883  | -1.5766571704 | 3.3490161580  |
| H2   | -0.0229116356 | -2.6288907786 | 2.8118081594  |
| H3   | -0.2644384576 | -0.8949889931 | 2.8813322842  |
| H4   | 1.6749373834  | -2.3517552245 | 1.0352935905  |

nuclear repulsion energy..... 1457.637666912 hartrees

/ end of geometry optimization iteration 10 /

end of program geopt

start of program onee  
smallest eigenvalue of S: 1.217E-03  
number of canonical orbitals..... 210  
end of program onee

start of program probe  
end of program probe

start of program grid

number of gridpoints:

| atom     | H25 | C1  | C2  | C3  | C4  | C5  | C6  | C7  |
|----------|-----|-----|-----|-----|-----|-----|-----|-----|
| grid # 1 | 73  | 89  | 87  | 90  | 87  | 87  | 85  | 85  |
| grid # 2 | 106 | 100 | 97  | 98  | 98  | 99  | 90  | 92  |
| grid # 3 | 224 | 183 | 183 | 194 | 182 | 182 | 187 | 183 |
| grid # 4 | 224 | 380 | 382 | 404 | 379 | 379 | 374 | 379 |

number of gridpoints:

| atom     | H27 | H28 | H30 | C8  | H32 | C10 | N2  | C9  |
|----------|-----|-----|-----|-----|-----|-----|-----|-----|
| grid # 1 | 73  | 73  | 73  | 86  | 73  | 82  | 99  | 76  |
| grid # 2 | 106 | 106 | 105 | 92  | 106 | 93  | 109 | 81  |
| grid # 3 | 224 | 224 | 220 | 189 | 223 | 175 | 223 | 163 |
| grid # 4 | 224 | 224 | 219 | 375 | 229 | 353 | 400 | 330 |

number of gridpoints:

| atom     | O1  | H43 | C12 | C11 | C19 | C13 | C14 | C15 |
|----------|-----|-----|-----|-----|-----|-----|-----|-----|
| grid # 1 | 111 | 69  | 90  | 80  | 71  | 87  | 87  | 89  |
| grid # 2 | 123 | 98  | 105 | 91  | 75  | 100 | 99  | 100 |
| grid # 3 | 272 | 210 | 192 | 176 | 143 | 182 | 182 | 182 |
| grid # 4 | 476 | 206 | 399 | 361 | 302 | 379 | 379 | 379 |

number of gridpoints:

| atom     | C16 | C17 | H49 | H50 | H51 | H52 | H53 | H1  |
|----------|-----|-----|-----|-----|-----|-----|-----|-----|
| grid # 1 | 86  | 85  | 73  | 73  | 73  | 71  | 72  | 71  |
| grid # 2 | 97  | 99  | 106 | 106 | 106 | 100 | 103 | 99  |
| grid # 3 | 181 | 182 | 224 | 223 | 224 | 215 | 216 | 220 |
| grid # 4 | 376 | 378 | 224 | 223 | 224 | 211 | 215 | 221 |

number of gridpoints:

| atom     | H2  | H3  | H4  | total |
|----------|-----|-----|-----|-------|
| grid # 1 | 72  | 71  | 69  | 2818  |
| grid # 2 | 99  | 97  | 100 | 3481  |
| grid # 3 | 219 | 214 | 218 | 7034  |
| grid # 4 | 220 | 212 | 210 | 10850 |

end of program grid

start of program rwr

recomputing RwR matrix 8 grid: 4  
recomputing RwR matrix 15 grid: 4  
end of program rwr

start of program scf

|      | i | u | d | i | g |                  |         | RMS     | maximum |
|------|---|---|---|---|---|------------------|---------|---------|---------|
|      | t | p | i | c | r |                  |         | density | DIIS    |
|      | e | d | i | u | i |                  | energy  | change  | error   |
|      | r | t | s | t | d | total energy     | change  |         |         |
| etot | 1 | N | N | 2 | U | -815.13860408996 |         | 2.2E-04 | 6.3E-03 |
| etot | 2 | Y | Y | 6 | M | -815.14073347678 | 2.1E-03 | 8.7E-05 | 1.9E-03 |
| etot | 3 | Y | Y | 6 | M | -815.14097323414 | 2.4E-04 | 2.8E-05 | 5.7E-04 |
| etot | 4 | N | Y | 2 | U | -815.14102486623 | 5.2E-05 | 1.1E-05 | 2.1E-04 |
| etot | 5 | Y | Y | 6 | M | -815.14102676651 | 1.9E-06 | 5.3E-06 | 8.8E-05 |

```

etot   6   Y   Y   6   M  -815.14102794136  1.2E-06  2.4E-06  4.5E-05
etot   7   Y   N   6   M  -815.14102835379  4.1E-07  0.0E+00  0.0E+00

```

Energy components, in hartrees:

```

(A) Nuclear repulsion..... 1457.63766691214
(E) Total one-electron terms..... -4000.83596030380
(I) Total two-electron terms..... 1728.05726503786
(L) Electronic energy..... -2272.77869526594 (E+I)
(N) Total energy..... -815.14102835379 (A+L)

```

SCFE: SCF energy: HF -815.14102835379 hartrees iterations: 7

HOMO energy: -0.29744

LUMO energy: 0.11794

Orbital energies:

```

-20.45300 -15.55204 -11.32095 -11.23595 -11.22305 -11.21495
-11.20810 -11.19967 -11.18806 -11.18579 -11.18533 -11.18450
-11.18310 -11.18258 -11.17962 -11.17795 -11.17707 -11.17596
-11.17281 -11.16473 -1.42469 -1.33378 -1.18047 -1.16243
-1.11375 -1.08839 -1.03823 -1.02723 -1.01940 -1.00163
-0.94881 -0.90496 -0.85283 -0.84414 -0.83043 -0.81118
-0.79143 -0.76057 -0.72189 -0.68636 -0.68140 -0.66795
-0.65699 -0.64316 -0.63998 -0.62501 -0.61358 -0.60757
-0.60468 -0.60106 -0.59224 -0.58324 -0.55198 -0.55015
-0.53300 -0.52479 -0.51613 -0.51326 -0.49879 -0.49498
-0.48952 -0.48504 -0.45816 -0.42168 -0.39458 -0.34911
-0.34234 -0.31510 -0.29744 0.11794 0.13250 0.14091
0.14322 0.20545 0.22129 0.26515 0.27160 0.28123
0.30682

```

end of program scf

start of program derla

end of program derla

start of program rwr

recomputing RwR matrix 8 grid: 4

recomputing RwR matrix 15 grid: 4

end of program rwr

start of program derlb

forces (hartrees/bohr) : total

| atom | label | x             | y             | z             |
|------|-------|---------------|---------------|---------------|
| 1    | H25   | 4.942888E-04  | 1.085106E-04  | 6.777792E-04  |
| 2    | C1    | 9.149954E-04  | 1.277964E-03  | -2.580834E-04 |
| 3    | C2    | -2.906137E-04 | -8.953488E-04 | 1.449004E-03  |
| 4    | C3    | 2.533503E-04  | -8.174955E-04 | 8.078189E-04  |
| 5    | C4    | 1.766098E-05  | 2.977986E-04  | -8.117422E-04 |
| 6    | C5    | -6.666134E-04 | 4.286042E-04  | -1.459685E-03 |
| 7    | C6    | 5.392638E-04  | 1.064791E-03  | 8.723250E-05  |
| 8    | C7    | -6.969799E-04 | -1.844274E-04 | 8.410534E-04  |
| 9    | H27   | -2.599920E-05 | -1.732855E-05 | 6.052677E-05  |
| 10   | H28   | -4.743331E-04 | -2.440486E-04 | -2.516310E-04 |

|       |       |               |               |               |
|-------|-------|---------------|---------------|---------------|
| 11    | H30   | -3.885976E-04 | -1.352475E-04 | -7.203910E-04 |
| 12    | C8    | 6.123525E-04  | 8.751091E-05  | -8.510351E-04 |
| 13    | H32   | 4.879794E-04  | 1.101571E-04  | 4.192584E-04  |
| 14    | C10   | -6.657436E-04 | -5.432465E-04 | 6.618698E-04  |
| 15    | N2    | -1.922156E-03 | -3.427584E-04 | -2.088374E-03 |
| 16    | C9    | -8.779267E-05 | -1.542378E-03 | -6.724825E-06 |
| 17    | O1    | 1.117678E-03  | 1.168967E-03  | 2.504592E-03  |
| 18    | H43   | -4.327281E-05 | 3.193259E-04  | 1.730451E-04  |
| 19    | C12   | 2.087354E-04  | 9.716727E-04  | -4.801166E-04 |
| 20    | C11   | 8.670897E-04  | -3.848822E-04 | 2.433786E-04  |
| 21    | C19   | -2.665666E-05 | 1.518712E-04  | -7.441307E-04 |
| 22    | C13   | -3.313531E-04 | 4.117694E-04  | 2.866083E-04  |
| 23    | C14   | 6.551073E-04  | 3.571361E-04  | -6.505991E-05 |
| 24    | C15   | -7.789026E-04 | -1.287632E-03 | 2.367100E-05  |
| 25    | C16   | 2.194202E-04  | -6.839796E-04 | 1.211889E-05  |
| 26    | C17   | -6.493763E-04 | 2.819037E-04  | 2.493719E-04  |
| 27    | H49   | 9.533104E-06  | 4.872716E-05  | 5.550205E-05  |
| 28    | H50   | 5.287651E-05  | -1.799942E-04 | -5.608688E-05 |
| 29    | H51   | 1.888451E-04  | -1.464445E-04 | -4.886211E-05 |
| 30    | H52   | -4.857083E-05 | 2.017186E-04  | -2.441456E-05 |
| 31    | H53   | -6.347714E-05 | 1.187900E-04  | 1.012850E-04  |
| 32    | H1    | 6.177986E-04  | -1.876919E-05 | -2.036923E-04 |
| 33    | H2    | -1.126628E-04 | -2.663228E-04 | -7.761274E-05 |
| 34    | H3    | -6.426653E-04 | 6.956461E-04  | 2.875296E-04  |
| 35    | H4    | -1.318604E-04 | 7.347958E-04  | 2.818405E-04  |
| ----- |       |               |               |               |
|       | total | -7.906521E-04 | 1.147357E-03  | 1.075844E-03  |

end of program der1b

start of program geopt 11

geometry optimization step 11

reading input hessian of dimension 105  
in five columns format

reading input hessian of dimension 105  
in five columns format

reading input hessian of dimension 105  
in five columns format

energy change: -3.7686E-04 . ( 5.0000E-05 )

gradient maximum: 2.7460E-03 . ( 4.5000E-04 )

gradient rms: 6.1862E-04 . ( 3.0000E-04 )

step size: 0.08078 trust radius: 0.30000

displacement maximum: 2.8158E-02 . ( 1.8000E-03 )

displacement rms: 7.2256E-03 . ( 1.2000E-03 )

predicted energy change: -1.0545E-04 geom step: 8.0785E-02 full step:  
8.0785E-02

molecular structure not yet converged...

center of mass moved by:

x: -6.8974E-03 y: 7.0898E-03 z: 4.1518E-03

new geometry:

|      | angstroms    |              |               |
|------|--------------|--------------|---------------|
| atom | x            | y            | z             |
| H25  | 0.9629736427 | 2.0249301356 | -4.1597022725 |
| C1   | 1.4968230847 | 2.0634681169 | -3.2319814596 |
| C2   | 2.9188034942 | 2.1870473069 | -0.7944456956 |
| C3   | 1.2155879527 | 1.1596148710 | -2.2151111946 |

|     |               |               |               |
|-----|---------------|---------------|---------------|
| C4  | 2.4791839753  | 3.0107124310  | -3.0263112467 |
| C5  | 3.1832208564  | 3.0714275653  | -1.8205833318 |
| C6  | 1.9339996954  | 1.2459012461  | -1.0143161363 |
| C7  | 0.2741683171  | 0.0425223778  | -2.0833985113 |
| H27 | 2.7099585473  | 3.7130528261  | -3.8015670991 |
| H28 | 3.9422400855  | 3.8168627145  | -1.6926976514 |
| H30 | 3.4391381238  | 2.2071293568  | 0.1389854473  |
| C8  | 0.4602164023  | -0.4794423144 | -0.8642766582 |
| H32 | -0.4294365104 | -0.2731370820 | -2.8175380067 |
| C10 | -0.0774572409 | -1.5507314957 | 0.0561399846  |
| N2  | 1.4554337917  | 0.2362726364  | -0.1982753841 |
| C9  | 1.7741907288  | -0.2349055448 | 1.0556476221  |
| O1  | 2.5505418953  | 0.2795771220  | 1.8304145178  |
| H43 | -0.0646931662 | -2.5139965607 | -0.4351656178 |
| C12 | -1.4970949276 | -1.2469673053 | 0.5101645892  |
| C11 | 0.9825712212  | -1.5391353097 | 1.2266161506  |
| C19 | 0.4628760429  | -1.6980172521 | 2.6570665755  |
| C13 | -3.7168299237 | -2.0189440429 | 1.0383916732  |
| C14 | -3.1681138243 | 0.2969219112  | 1.2896378545  |
| C15 | -4.0903353507 | -0.7339865605 | 1.3848293157  |
| C16 | -1.8826669461 | 0.0432497921  | 0.8519964275  |
| C17 | -2.4254351567 | -2.2715799002 | 0.6041644451  |
| H49 | -4.4242406308 | -2.8210396432 | 1.1006317292  |
| H50 | -3.4531070538 | 1.2965519619  | 1.5503397114  |
| H51 | -5.0880073657 | -0.5334184007 | 1.7198883219  |
| H52 | -1.1811362851 | 0.8468729921  | 0.7633331367  |
| H53 | -2.1442585100 | -3.2711424673 | 0.3326970116  |
| H1  | 1.2936000951  | -1.5957346638 | 3.3453700006  |
| H2  | 0.0100601913  | -2.6715701697 | 2.7936925370  |
| H3  | -0.2747206209 | -0.9427698513 | 2.8876363148  |
| H4  | 1.6970968675  | -2.3322251261 | 1.0246405805  |

nuclear repulsion energy..... 1457.777338860 hartrees

/ end of geometry optimization iteration 11 /

end of program geopt

start of program onee

smallest eigenvalue of S: 1.210E-03

number of canonical orbitals..... 210

end of program onee

start of program probe

end of program probe

start of program grid

number of gridpoints:

|          |     |     |     |     |     |     |     |     |
|----------|-----|-----|-----|-----|-----|-----|-----|-----|
| atom     | H25 | C1  | C2  | C3  | C4  | C5  | C6  | C7  |
| grid # 1 | 73  | 89  | 87  | 90  | 87  | 87  | 84  | 85  |
| grid # 2 | 106 | 99  | 97  | 98  | 98  | 98  | 90  | 92  |
| grid # 3 | 224 | 183 | 182 | 194 | 182 | 182 | 187 | 182 |
| grid # 4 | 224 | 379 | 381 | 407 | 379 | 379 | 371 | 376 |

number of gridpoints:

|          |     |     |     |    |     |     |    |    |
|----------|-----|-----|-----|----|-----|-----|----|----|
| atom     | H27 | H28 | H30 | C8 | H32 | C10 | N2 | C9 |
| grid # 1 | 73  | 73  | 73  | 86 | 73  | 82  | 99 | 76 |

|          |     |     |     |     |     |     |     |     |
|----------|-----|-----|-----|-----|-----|-----|-----|-----|
| grid # 2 | 106 | 106 | 105 | 92  | 106 | 93  | 109 | 81  |
| grid # 3 | 224 | 224 | 220 | 187 | 223 | 175 | 223 | 164 |
| grid # 4 | 224 | 224 | 219 | 376 | 229 | 351 | 399 | 330 |

number of gridpoints:

|          |     |     |     |     |     |     |     |     |
|----------|-----|-----|-----|-----|-----|-----|-----|-----|
| atom     | O1  | H43 | C12 | C11 | C19 | C13 | C14 | C15 |
| grid # 1 | 111 | 69  | 91  | 80  | 72  | 87  | 86  | 89  |
| grid # 2 | 127 | 98  | 106 | 91  | 74  | 100 | 99  | 100 |
| grid # 3 | 272 | 211 | 192 | 175 | 139 | 182 | 182 | 182 |
| grid # 4 | 476 | 205 | 397 | 361 | 308 | 378 | 378 | 378 |

number of gridpoints:

|          |     |     |     |     |     |     |     |     |
|----------|-----|-----|-----|-----|-----|-----|-----|-----|
| atom     | C16 | C17 | H49 | H50 | H51 | H52 | H53 | H1  |
| grid # 1 | 86  | 85  | 73  | 73  | 73  | 71  | 72  | 71  |
| grid # 2 | 97  | 99  | 106 | 106 | 106 | 100 | 103 | 99  |
| grid # 3 | 181 | 182 | 224 | 223 | 224 | 216 | 216 | 220 |
| grid # 4 | 375 | 378 | 224 | 223 | 224 | 211 | 215 | 220 |

number of gridpoints:

|          |     |     |     |       |
|----------|-----|-----|-----|-------|
| atom     | H2  | H3  | H4  | total |
| grid # 1 | 72  | 71  | 69  | 2818  |
| grid # 2 | 99  | 97  | 100 | 3483  |
| grid # 3 | 219 | 214 | 218 | 7028  |
| grid # 4 | 220 | 212 | 209 | 10840 |

end of program grid

start of program rwr

```
recomputing Rwr matrix 4      grid: 4
recomputing Rwr matrix 15     grid: 4
end of program rwr
```

start of program scf

|      |   |   |   |   |   |                  |               |         |         |
|------|---|---|---|---|---|------------------|---------------|---------|---------|
|      | i | u | d | i | g |                  |               |         |         |
|      | t | p | i | c | r |                  |               | RMS     | maximum |
|      | e | d | i | u | i |                  |               | density | DIIS    |
|      | r | t | s | t | d | total energy     | energy change | change  | error   |
| etot | 1 | N | N | 1 | U | -815.13839756236 |               | 2.3E-04 | 5.9E-03 |
| etot | 2 | Y | Y | 4 | M | -815.14054954178 | 2.2E-03       | 8.9E-05 | 1.6E-03 |
| etot | 3 | Y | Y | 4 | M | -815.14080117381 | 2.5E-04       | 2.8E-05 | 4.9E-04 |
| etot | 4 | N | Y | 1 | U | -815.14081383399 | 1.3E-05       | 1.1E-05 | 1.6E-04 |
| etot | 5 | Y | Y | 4 | M | -815.14081703386 | 3.2E-06       | 6.3E-06 | 8.0E-05 |
| etot | 6 | Y | Y | 4 | M | -815.14081761458 | 5.8E-07       | 1.9E-06 | 2.4E-05 |
| etot | 7 | Y | N | 4 | M | -815.14081777425 | 1.6E-07       | 0.0E+00 | 0.0E+00 |

Energy components, in hartrees:

```
(A) Nuclear repulsion..... 1457.77733886019
(E) Total one-electron terms..... -4001.11822458234
(I) Total two-electron terms..... 1728.20006794790
(L) Electronic energy..... -2272.91815663444 (E+I)
(N) Total energy..... -815.14081777425 (A+L)
```

SCFE: SCF energy: HF -815.14081777425 hartrees iterations: 7

```
HOMO energy: -0.29726
LUMO energy: 0.11769
```



Orbital energies:

|           |           |           |           |           |           |
|-----------|-----------|-----------|-----------|-----------|-----------|
| -20.45391 | -15.55228 | -11.32202 | -11.23575 | -11.22283 | -11.21528 |
| -11.20819 | -11.19965 | -11.18785 | -11.18558 | -11.18503 | -11.18431 |
| -11.18289 | -11.18231 | -11.17919 | -11.17743 | -11.17694 | -11.17580 |
| -11.17237 | -11.16473 | -1.42189  | -1.33343  | -1.18069  | -1.16266  |
| -1.11397  | -1.08819  | -1.03822  | -1.02746  | -1.02004  | -1.00150  |
| -0.94903  | -0.90491  | -0.85235  | -0.84401  | -0.83075  | -0.81146  |
| -0.79158  | -0.76046  | -0.72225  | -0.68651  | -0.68130  | -0.66786  |
| -0.65715  | -0.64287  | -0.64004  | -0.62512  | -0.61383  | -0.60776  |
| -0.60450  | -0.60104  | -0.59230  | -0.58284  | -0.55146  | -0.55041  |
| -0.53286  | -0.52484  | -0.51636  | -0.51316  | -0.49877  | -0.49483  |
| -0.48935  | -0.48520  | -0.45834  | -0.42201  | -0.39435  | -0.34914  |
| -0.34245  | -0.31590  | -0.29726  | 0.11769   | 0.13221   | 0.14140   |
| 0.14365   | 0.20489   | 0.22182   | 0.26541   | 0.27182   | 0.28097   |
| 0.30595   |           |           |           |           |           |

end of program scf

start of program derla

end of program derla

start of program rwr

recomputing RwR matrix 4 grid: 4

recomputing RwR matrix 15 grid: 4

end of program rwr

start of program derlb

forces (hartrees/bohr) : total

| atom | label | x             | y             | z             |
|------|-------|---------------|---------------|---------------|
| 1    | H25   | -3.556138E-04 | -1.671816E-04 | -5.890125E-04 |
| 2    | C1    | -1.067576E-03 | -9.830863E-04 | -8.034071E-04 |
| 3    | C2    | 3.721726E-04  | 7.363976E-04  | -4.481067E-04 |
| 4    | C3    | -3.055205E-04 | -2.574975E-05 | -3.277892E-04 |
| 5    | C4    | 1.539307E-04  | 8.779456E-05  | 6.377039E-04  |
| 6    | C5    | 1.086584E-03  | 4.459042E-04  | 8.062370E-04  |
| 7    | C6    | -1.237775E-03 | -1.714081E-04 | 5.931581E-04  |
| 8    | C7    | 5.024405E-05  | 2.264508E-04  | -9.155206E-04 |
| 9    | H27   | -6.945315E-05 | 1.990438E-04  | -2.805352E-04 |
| 10   | H28   | -2.892582E-05 | 7.879841E-05  | 1.602097E-04  |
| 11   | H30   | 2.418721E-04  | 3.888469E-04  | 6.806829E-04  |
| 12   | C8    | -5.051504E-04 | 4.138593E-04  | 9.297371E-04  |
| 13   | H32   | -3.827551E-04 | -3.356723E-04 | -5.421653E-04 |
| 14   | C10   | 1.407968E-04  | 4.608890E-04  | 1.851972E-04  |
| 15   | N2    | 3.213095E-03  | -3.578236E-04 | 2.291375E-03  |
| 16   | C9    | 1.639834E-03  | 1.917560E-03  | 2.106272E-03  |
| 17   | O1    | -3.510309E-03 | -2.144232E-03 | -3.823264E-03 |
| 18   | H43   | -5.224398E-05 | 7.419927E-05  | 1.358377E-04  |
| 19   | C12   | 4.752834E-04  | -5.561932E-04 | -1.256769E-04 |
| 20   | C11   | 3.705402E-04  | 1.284676E-04  | 2.425146E-04  |
| 21   | C19   | 1.737153E-04  | 7.501079E-04  | 3.410695E-04  |
| 22   | C13   | -1.861337E-04 | 3.981059E-04  | 1.181416E-04  |
| 23   | C14   | -3.539349E-04 | 2.618534E-04  | 1.229171E-04  |
| 24   | C15   | -3.066416E-04 | -3.001389E-05 | 1.255333E-04  |
| 25   | C16   | -1.571717E-04 | -4.721544E-04 | -5.523683E-05 |
| 26   | C17   | 7.182871E-04  | -3.056450E-04 | -2.525316E-04 |

|       |       |               |               |               |
|-------|-------|---------------|---------------|---------------|
| 27    | H49   | -2.955119E-04 | -3.212097E-04 | 9.707874E-05  |
| 28    | H50   | -1.595242E-05 | 1.152517E-04  | 3.007410E-05  |
| 29    | H51   | -2.033661E-04 | -1.144511E-05 | 6.566678E-05  |
| 30    | H52   | 4.755975E-04  | 8.268037E-04  | 1.385464E-05  |
| 31    | H53   | -5.628792E-06 | 5.449310E-05  | 1.492274E-04  |
| 32    | H1    | -5.603850E-04 | 1.022143E-05  | -4.177039E-04 |
| 33    | H2    | -2.206289E-04 | -1.257292E-04 | 1.933007E-04  |
| 34    | H3    | 3.674765E-04  | -2.482146E-04 | 2.566545E-04  |
| 35    | H4    | 3.428726E-05  | 9.817103E-05  | -4.610339E-05 |
| ----- |       |               |               |               |
|       | total | -3.069620E-04 | 1.417461E-03  | 1.655389E-03  |

end of program derlb

start of program geopt 12

geometry optimization step 12

reading input hessian of dimension 105  
in five columns format

reading input hessian of dimension 105  
in five columns format

reading input hessian of dimension 105  
in five columns format

energy change: 2.1058E-04 . ( 5.0000E-05 )

gradient maximum: 5.6759E-03 . ( 4.5000E-04 )

gradient rms: 7.2282E-04 . ( 3.0000E-04 )

step size: 0.07000 trust radius: 0.30000

displacement maximum: 2.5590E-02 . ( 1.8000E-03 )

displacement rms: 6.2611E-03 . ( 1.2000E-03 )

predicted energy change: -7.3227E-05 geom step: 7.0002E-02 full step:  
7.0002E-02

molecular structure not yet converged...

center of mass moved by:

x: -3.4685E-03 y: 2.9347E-03 z: 1.4732E-03

new geometry:

|      | angstroms     |               |               |
|------|---------------|---------------|---------------|
| atom | x             | y             | z             |
| H25  | 0.9821859575  | 1.9923598495  | -4.1778990947 |
| C1   | 1.5030394553  | 2.0446669770  | -3.2417865055 |
| C2   | 2.8923662701  | 2.2034485510  | -0.7807142184 |
| C3   | 1.2219670356  | 1.1435894625  | -2.2213406065 |
| C4   | 2.4681877280  | 3.0081282054  | -3.0261785915 |
| C5   | 3.1568983960  | 3.0859182847  | -1.8091916309 |
| C6   | 1.9244374053  | 1.2466328825  | -1.0103469327 |
| C7   | 0.2926245258  | 0.0154403256  | -2.0958539111 |
| H27  | 2.6975524867  | 3.7098355374  | -3.8030351869 |
| H28  | 3.9018567693  | 3.8435146553  | -1.6746184631 |
| H30  | 3.3992694742  | 2.2363579346  | 0.1608185955  |
| C8   | 0.4712073982  | -0.4952455578 | -0.8695693791 |
| H32  | -0.3989489633 | -0.3141620758 | -2.8376071615 |
| C10  | -0.0717526626 | -1.5603266492 | 0.0548476442  |
| N2   | 1.4568067554  | 0.2298762439  | -0.1974967505 |
| C9   | 1.7614842816  | -0.2312991505 | 1.0613884012  |
| O1   | 2.5186257520  | 0.2967116100  | 1.8426993627  |
| H43  | -0.0666008951 | -2.5250116980 | -0.4313401850 |
| C12  | -1.4891630422 | -1.2447229002 | 0.5074914611  |
| C11  | 0.9892252258  | -1.5472100848 | 1.2231315216  |

|     |               |               |              |
|-----|---------------|---------------|--------------|
| C19 | 0.4720174129  | -1.7301978200 | 2.6531626736 |
| C13 | -3.7160213882 | -1.9966744251 | 1.0402375260 |
| C14 | -3.1474135032 | 0.3144644362  | 1.2864651844 |
| C15 | -4.0789662280 | -0.7086431057 | 1.3846026748 |
| C16 | -1.8640989832 | 0.0493127162  | 0.8476796951 |
| C17 | -2.4263285289 | -2.2609425065 | 0.6050369521 |
| H49 | -4.4295457522 | -2.7935406864 | 1.1050945589 |
| H50 | -3.4229312395 | 1.3171076964  | 1.5454932697 |
| H51 | -5.0742950373 | -0.4994009844 | 1.7202061520 |
| H52 | -1.1563824224 | 0.8486956287  | 0.7566549316 |
| H53 | -2.1543691772 | -3.2637708946 | 0.3368997639 |
| H1  | 1.3046702834  | -1.6378242009 | 3.3360170260 |
| H2  | 0.0235902088  | -2.7081548594 | 2.7777669466 |
| H3  | -0.2667523852 | -0.9824544967 | 2.9015065478 |
| H4  | 1.7149496436  | -2.3274611753 | 1.0094065084 |

nuclear repulsion energy..... 1458.402573227 hartrees

/ end of geometry optimization iteration 12 /

end of program geopt

start of program onee  
smallest eigenvalue of S: 1.222E-03  
number of canonical orbitals..... 210  
end of program onee

start of program probe  
end of program probe

start of program grid

number of gridpoints:

| atom     | H25 | C1  | C2  | C3  | C4  | C5  | C6  | C7  |
|----------|-----|-----|-----|-----|-----|-----|-----|-----|
| grid # 1 | 73  | 89  | 87  | 90  | 87  | 87  | 84  | 85  |
| grid # 2 | 106 | 99  | 98  | 98  | 98  | 99  | 90  | 92  |
| grid # 3 | 224 | 183 | 183 | 194 | 182 | 182 | 187 | 183 |
| grid # 4 | 224 | 379 | 381 | 407 | 379 | 379 | 373 | 377 |

number of gridpoints:

| atom     | H27 | H28 | H30 | C8  | H32 | C10 | N2  | C9  |
|----------|-----|-----|-----|-----|-----|-----|-----|-----|
| grid # 1 | 73  | 73  | 73  | 86  | 73  | 81  | 99  | 76  |
| grid # 2 | 106 | 106 | 105 | 92  | 106 | 93  | 109 | 81  |
| grid # 3 | 224 | 224 | 220 | 187 | 223 | 175 | 223 | 163 |
| grid # 4 | 224 | 224 | 219 | 375 | 229 | 349 | 399 | 328 |

number of gridpoints:

| atom     | O1  | H43 | C12 | C11 | C19 | C13 | C14 | C15 |
|----------|-----|-----|-----|-----|-----|-----|-----|-----|
| grid # 1 | 111 | 69  | 90  | 80  | 71  | 87  | 86  | 89  |
| grid # 2 | 127 | 97  | 106 | 92  | 76  | 100 | 99  | 100 |
| grid # 3 | 273 | 211 | 192 | 174 | 149 | 182 | 182 | 182 |
| grid # 4 | 475 | 205 | 397 | 360 | 305 | 378 | 378 | 378 |

number of gridpoints:

| atom     | C16 | C17 | H49 | H50 | H51 | H52 | H53 | H1  |
|----------|-----|-----|-----|-----|-----|-----|-----|-----|
| grid # 1 | 86  | 85  | 73  | 73  | 73  | 71  | 72  | 71  |
| grid # 2 | 97  | 98  | 106 | 106 | 106 | 100 | 103 | 99  |
| grid # 3 | 181 | 182 | 224 | 223 | 224 | 216 | 216 | 220 |

```

grid # 4      376      377      224      223      224      211      215      220

```

```

number of gridpoints:

```

```

  atom      H2      H3      H4  total
grid # 1      72      71      69   2815
grid # 2      99      97     100   3486
grid # 3     220     214     219   7041
grid # 4     221     212     211  10836

```

```

end of program grid

```

```

start of program rwr

```

```

recomputing Rwr matrix      8      grid:  4
recomputing Rwr matrix     15      grid:  4
end of program rwr

```

```

start of program scf

```

```

      i   u   d   i   g
      t   p   i   c   r
      e   d   i   u   i
      r   t   s   t   d
                                total energy      energy      RMS      maximum
                                change      density      DIIS
                                change      change      error

etot  1  N  N  1  U  -815.13885786835
etot  2  Y  Y  4  M  -815.14053535960  1.7E-03  7.9E-05  2.6E-03
etot  3  Y  Y  4  M  -815.14072622945  1.9E-04  2.8E-05  8.0E-04
etot  4  Y  Y  4  M  -815.14074207598  1.6E-05  9.1E-06  2.3E-04
etot  5  Y  Y  4  M  -815.14074236696  2.9E-07  3.8E-06  8.2E-05
etot  6  N  N  1  U  -815.14076067622  1.8E-05  0.0E+00  0.0E+00

```

```

Energy components, in hartrees:

```

```

(A)  Nuclear repulsion..... 1458.40257322696
(E)  Total one-electron terms..... -4002.37422815778
(I)  Total two-electron terms..... 1728.83089425460
(L)  Electronic energy..... -2273.54333390318  (E+I)
(N)  Total energy..... -815.14076067622  (A+L)

```

```

SCFE: SCF energy: HF      -815.14076067622 hartrees      iterations:      6

```

```

HOMO energy:      -0.29710
LUMO energy:      0.11745

```

```

Orbital energies:

```

```

-20.45388  -15.55216  -11.32163  -11.23573  -11.22316  -11.21486
-11.20818  -11.19953  -11.18827  -11.18551  -11.18498  -11.18425
-11.18280  -11.18230  -11.17963  -11.17785  -11.17730  -11.17621
-11.17284  -11.16459  -1.42345  -1.33355  -1.18040  -1.16222
-1.11377   -1.08806  -1.03815  -1.02700  -1.01979  -1.00121
-0.94858   -0.90530  -0.85216  -0.84386  -0.83051  -0.81128
-0.79150   -0.76019  -0.72228  -0.68650  -0.68136  -0.66764
-0.65681   -0.64283  -0.64030  -0.62478  -0.61385  -0.60778
-0.60456   -0.60051  -0.59246  -0.58257  -0.55121  -0.55038
-0.53303   -0.52495  -0.51638  -0.51338  -0.49859  -0.49473
-0.48899   -0.48512  -0.45831  -0.42206  -0.39446  -0.34878
-0.34237   -0.31554  -0.29710   0.11745   0.13222   0.14155
0.14389    0.20471   0.22209   0.26551   0.27169   0.28106
0.30573

```

end of program scf

start of program derla  
end of program derla

start of program rwr  
recomputing RwR matrix 8 grid: 4  
recomputing RwR matrix 15 grid: 4  
end of program rwr

start of program derlb

forces (hartrees/bohr) : total

| atom  | label | x             | y             | z             |
|-------|-------|---------------|---------------|---------------|
| 1     | H25   | 2.011708E-04  | -9.306334E-05 | 5.148739E-04  |
| 2     | C1    | -7.662316E-04 | -8.980852E-04 | 4.662703E-04  |
| 3     | C2    | 1.045704E-04  | 8.500277E-04  | -1.372132E-03 |
| 4     | C3    | 2.280399E-04  | 3.204608E-04  | -1.476427E-06 |
| 5     | C4    | 9.776529E-04  | 3.303159E-05  | 1.606021E-03  |
| 6     | C5    | -7.044640E-04 | -1.356714E-04 | -5.135340E-04 |
| 7     | C6    | -3.620839E-04 | -7.633864E-04 | -9.405624E-04 |
| 8     | C7    | 1.879348E-04  | 2.010893E-04  | 1.533414E-05  |
| 9     | H27   | 1.782558E-04  | 1.282640E-04  | 1.765797E-04  |
| 10    | H28   | 1.937737E-04  | 4.216643E-04  | -5.229801E-05 |
| 11    | H30   | -2.251337E-05 | 2.909429E-04  | -1.073933E-04 |
| 12    | C8    | -3.600201E-04 | -5.507328E-04 | -1.798444E-04 |
| 13    | H32   | 2.867983E-04  | 2.146759E-04  | 5.131084E-04  |
| 14    | C10   | 3.582999E-04  | 4.188446E-04  | -2.351722E-04 |
| 15    | N2    | -1.004548E-03 | 9.819884E-04  | -4.583167E-04 |
| 16    | C9    | 9.789034E-04  | 4.677299E-04  | 1.554489E-03  |
| 17    | O1    | -8.844065E-04 | -7.917812E-04 | -7.823750E-04 |
| 18    | H43   | 1.302638E-04  | -6.604575E-04 | -1.752657E-04 |
| 19    | C12   | 2.023390E-04  | -2.958080E-04 | 5.564862E-04  |
| 20    | C11   | -1.386757E-03 | -1.233017E-04 | 1.025217E-03  |
| 21    | C19   | -5.959108E-05 | -1.839814E-04 | -1.227900E-03 |
| 22    | C13   | 3.636125E-04  | -1.376352E-04 | -1.247337E-04 |
| 23    | C14   | -8.869557E-05 | -6.530894E-05 | -6.511584E-05 |
| 24    | C15   | 4.452336E-04  | 4.484264E-04  | -3.155066E-05 |
| 25    | C16   | -4.049063E-04 | 1.996871E-04  | 1.694209E-06  |
| 26    | C17   | 2.593563E-04  | -1.132965E-04 | -6.214955E-05 |
| 27    | H49   | -1.333866E-04 | -1.516496E-04 | 5.779107E-05  |
| 28    | H50   | -9.094372E-05 | 1.400613E-04  | 5.331753E-05  |
| 29    | H51   | -4.106356E-04 | 9.524111E-05  | 1.524459E-04  |
| 30    | H52   | -1.325195E-05 | 9.525865E-05  | 1.308699E-04  |
| 31    | H53   | 7.914668E-05  | -2.860516E-05 | 4.829597E-05  |
| 32    | H1    | 8.175413E-04  | 3.767627E-04  | 1.272542E-03  |
| 33    | H2    | -2.752270E-06 | 1.924453E-04  | -2.788320E-04 |
| 34    | H3    | 1.919286E-04  | 2.011393E-04  | -2.280176E-04 |
| 35    | H4    | -2.276243E-04 | 9.117969E-05  | 1.698567E-04  |
| total |       | -7.379901E-04 | 1.176157E-03  | 1.478523E-03  |

end of program derlb

start of program geopt 13

geometry optimization step 13  
 reading input hessian of dimension 105  
 in five columns format  
 reading input hessian of dimension 105  
 in five columns format  
 reading input hessian of dimension 105  
 in five columns format

energy change: 5.7098E-05 . ( 5.0000E-05 )  
 gradient maximum: 1.9403E-03 . ( 4.5000E-04 )  
 gradient rms: 4.5887E-04 . ( 3.0000E-04 )  
 step size: 0.04376 trust radius: 0.30000  
 displacement maximum: 1.7327E-02 . ( 1.8000E-03 )  
 displacement rms: 3.9137E-03 . ( 1.2000E-03 )  
 predicted energy change: -4.5801E-05 geom step: 4.3756E-02 full step:  
 4.3756E-02  
 molecular structure not yet converged...

center of mass moved by:  
 x: 2.6044E-03 y: -2.8800E-03 z: -1.1773E-03

new geometry:

|      | angstroms     |               |               |
|------|---------------|---------------|---------------|
| atom | x             | y             | z             |
| H25  | 0.9780137671  | 1.9972409320  | -4.1729589406 |
| C1   | 1.5017589175  | 2.0468983917  | -3.2390598519 |
| C2   | 2.8998708018  | 2.2026166209  | -0.7866079705 |
| C3   | 1.2202434228  | 1.1472178500  | -2.2196228911 |
| C4   | 2.4715869948  | 3.0085184618  | -3.0241385143 |
| C5   | 3.1648365198  | 3.0856832457  | -1.8123446644 |
| C6   | 1.9273499873  | 1.2472474115  | -1.0119555355 |
| C7   | 0.2861137841  | 0.0241293414  | -2.0919453225 |
| H27  | 2.7007075406  | 3.7109374553  | -3.8007255351 |
| H28  | 3.9117812714  | 3.8428434161  | -1.6794511195 |
| H30  | 3.4090230781  | 2.2362581351  | 0.1539079416  |
| C8   | 0.4651768265  | -0.4874373999 | -0.8662860852 |
| H32  | -0.4095546862 | -0.3013610703 | -2.8308318831 |
| C10  | -0.0744347190 | -1.5558079667 | 0.0552647761  |
| N2   | 1.4550719615  | 0.2345388269  | -0.1962378888 |
| C9   | 1.7695971217  | -0.2368093368 | 1.0574429753  |
| O1   | 2.5405953551  | 0.2789510974  | 1.8316647996  |
| H43  | -0.0663073744 | -2.5205847594 | -0.4338972902 |
| C12  | -1.4919142463 | -1.2459648632 | 0.5101186582  |
| C11  | 0.9848333813  | -1.5447975692 | 1.2246150379  |
| C19  | 0.4674494037  | -1.7124615381 | 2.6543001917  |
| C13  | -3.7180496883 | -2.0031963882 | 1.0359730743  |
| C14  | -3.1557115945 | 0.3085471435  | 1.2931977752  |
| C15  | -4.0849305687 | -0.7165955743 | 1.3856259342  |
| C16  | -1.8708239297 | 0.0466691987  | 0.8548466907  |
| C17  | -2.4267221154 | -2.2643049429 | 0.6011951018  |
| H49  | -4.4313191486 | -2.8014247941 | 1.0963552755  |
| H50  | -3.4332789454 | 1.3095273193  | 1.5572011024  |
| H51  | -5.0821779079 | -0.5109735130 | 1.7210895662  |
| H52  | -1.1634201656 | 0.8474776261  | 0.7696375576  |
| H53  | -2.1524972367 | -3.2652956545 | 0.3284245856  |
| H1   | 1.2984049997  | -1.6174258405 | 3.3410443805  |
| H2   | 0.0129758679  | -2.6863278215 | 2.7847446894  |
| H3   | -0.2666527946 | -0.9591924484 | 2.8942250372  |
| H4   | 1.7035592531  | -2.3329825027 | 1.0166220630  |

nuclear repulsion energy..... 1458.127010856 hartrees

```
-----
/  end of geometry optimization iteration 13  /
-----
```

end of program geopt

start of program onee  
smallest eigenvalue of S: 1.217E-03  
number of canonical orbitals..... 210  
end of program onee

start of program probe  
end of program probe

start of program grid

number of gridpoints:

| atom     | H25 | C1  | C2  | C3  | C4  | C5  | C6  | C7  |
|----------|-----|-----|-----|-----|-----|-----|-----|-----|
| grid # 1 | 73  | 89  | 87  | 90  | 87  | 87  | 85  | 85  |
| grid # 2 | 106 | 100 | 97  | 98  | 98  | 98  | 90  | 92  |
| grid # 3 | 224 | 183 | 183 | 194 | 182 | 182 | 187 | 183 |
| grid # 4 | 224 | 379 | 381 | 404 | 379 | 379 | 374 | 377 |

number of gridpoints:

| atom     | H27 | H28 | H30 | C8  | H32 | C10 | N2  | C9  |
|----------|-----|-----|-----|-----|-----|-----|-----|-----|
| grid # 1 | 73  | 73  | 73  | 86  | 73  | 81  | 99  | 76  |
| grid # 2 | 106 | 106 | 105 | 92  | 106 | 93  | 109 | 81  |
| grid # 3 | 224 | 224 | 220 | 188 | 223 | 175 | 223 | 163 |
| grid # 4 | 224 | 224 | 219 | 377 | 229 | 351 | 401 | 330 |

number of gridpoints:

| atom     | O1  | H43 | C12 | C11 | C19 | C13 | C14 | C15 |
|----------|-----|-----|-----|-----|-----|-----|-----|-----|
| grid # 1 | 111 | 69  | 90  | 80  | 71  | 87  | 87  | 89  |
| grid # 2 | 123 | 98  | 105 | 91  | 78  | 100 | 99  | 100 |
| grid # 3 | 272 | 211 | 193 | 175 | 149 | 182 | 182 | 182 |
| grid # 4 | 475 | 205 | 399 | 361 | 306 | 379 | 379 | 379 |

number of gridpoints:

| atom     | C16 | C17 | H49 | H50 | H51 | H52 | H53 | H1  |
|----------|-----|-----|-----|-----|-----|-----|-----|-----|
| grid # 1 | 86  | 86  | 73  | 73  | 73  | 71  | 72  | 71  |
| grid # 2 | 97  | 99  | 106 | 106 | 106 | 100 | 103 | 99  |
| grid # 3 | 181 | 182 | 224 | 223 | 224 | 216 | 216 | 220 |
| grid # 4 | 376 | 377 | 224 | 223 | 224 | 211 | 215 | 221 |

number of gridpoints:

| atom     | H2  | H3  | H4  | total |
|----------|-----|-----|-----|-------|
| grid # 1 | 72  | 71  | 69  | 2818  |
| grid # 2 | 99  | 97  | 100 | 3483  |
| grid # 3 | 219 | 214 | 218 | 7041  |
| grid # 4 | 220 | 212 | 211 | 10849 |

end of program grid

start of program rwr  
recomputing Rwr matrix 8 grid: 4  
recomputing Rwr matrix 15 grid: 4  
end of program rwr

start of program scf

|      | i | u | d | i | g |                  | energy   | RMS     | maximum |
|------|---|---|---|---|---|------------------|----------|---------|---------|
|      | t | p | i | c | r |                  | change   | density | DIIS    |
|      | e | d | i | u | i |                  |          | change  | error   |
|      | r | t | s | t | d | total energy     |          |         |         |
| etot | 1 | N | N | 1 | U | -815.14032657107 |          | 1.6E-04 | 3.0E-03 |
| etot | 2 | Y | Y | 4 | M | -815.14077652460 | 4.5E-04  | 4.0E-05 | 8.2E-04 |
| etot | 3 | Y | Y | 4 | M | -815.14082066760 | 4.4E-05  | 1.4E-05 | 2.9E-04 |
| etot | 4 | Y | Y | 4 | M | -815.14082476245 | 4.1E-06  | 6.1E-06 | 1.4E-04 |
| etot | 5 | Y | Y | 4 | M | -815.14082690422 | 2.1E-06  | 1.9E-06 | 5.5E-05 |
| etot | 6 | N | N | 1 | U | -815.14082034438 | -6.6E-06 | 0.0E+00 | 0.0E+00 |

Energy components, in hartrees:

|     |                               |                   |       |
|-----|-------------------------------|-------------------|-------|
| (A) | Nuclear repulsion.....        | 1458.12701085585  |       |
| (E) | Total one-electron terms..... | -4001.82078209807 |       |
| (I) | Total two-electron terms..... | 1728.55295089784  |       |
| (L) | Electronic energy.....        | -2273.26783120023 | (E+I) |
| (N) | Total energy.....             | -815.14082034438  | (A+L) |

SCFE: SCF energy: HF      -815.14082034438 hartrees      iterations:      6

HOMO energy:      -0.29737

LUMO energy:      0.11774

Orbital energies:

|           |           |           |           |           |           |
|-----------|-----------|-----------|-----------|-----------|-----------|
| -20.45366 | -15.55209 | -11.32154 | -11.23586 | -11.22323 | -11.21501 |
| -11.20800 | -11.19969 | -11.18802 | -11.18570 | -11.18522 | -11.18446 |
| -11.18302 | -11.18260 | -11.17945 | -11.17769 | -11.17720 | -11.17593 |
| -11.17264 | -11.16443 | -1.42395  | -1.33340  | -1.18037  | -1.16225  |
| -1.11401  | -1.08811  | -1.03823  | -1.02676  | -1.01953  | -1.00157  |
| -0.94891  | -0.90504  | -0.85241  | -0.84390  | -0.83033  | -0.81097  |
| -0.79132  | -0.76047  | -0.72206  | -0.68643  | -0.68147  | -0.66771  |
| -0.65698  | -0.64295  | -0.64007  | -0.62499  | -0.61377  | -0.60758  |
| -0.60467  | -0.60046  | -0.59247  | -0.58296  | -0.55162  | -0.55047  |
| -0.53313  | -0.52485  | -0.51616  | -0.51338  | -0.49862  | -0.49487  |
| -0.48930  | -0.48508  | -0.45834  | -0.42185  | -0.39453  | -0.34872  |
| -0.34241  | -0.31523  | -0.29737  | 0.11774   | 0.13210   | 0.14154   |
| 0.14366   | 0.20516   | 0.22180   | 0.26528   | 0.27164   | 0.28090   |
| 0.30591   |           |           |           |           |           |

end of program scf

start of program derla

end of program derla

start of program rwr

recomputing RwR matrix      8      grid:      4

recomputing RwR matrix      15      grid:      4

end of program rwr

start of program derlb

forces (hartrees/bohr) : total



| atom  | label | x             | y             | z             |
|-------|-------|---------------|---------------|---------------|
| 1     | H25   | 1.026659E-04  | 7.940149E-05  | 1.259725E-05  |
| 2     | C1    | 7.385166E-04  | 1.041774E-03  | 3.640578E-04  |
| 3     | C2    | -4.277132E-04 | -7.121912E-04 | 1.072111E-03  |
| 4     | C3    | 1.823096E-04  | 6.080676E-05  | 1.454382E-04  |
| 5     | C4    | -3.486319E-04 | -3.976083E-05 | -1.220409E-03 |
| 6     | C5    | -5.429509E-04 | -4.812900E-05 | -4.274587E-04 |
| 7     | C6    | 3.672095E-04  | 5.257589E-04  | -3.842109E-05 |
| 8     | C7    | 2.893655E-06  | 1.343825E-04  | 3.563527E-04  |
| 9     | H27   | -1.093378E-04 | -9.313943E-05 | -3.686873E-05 |
| 10    | H28   | -2.670753E-04 | -1.689756E-04 | -7.354570E-05 |
| 11    | H30   | -1.011360E-04 | -1.262256E-04 | -1.134469E-04 |
| 12    | C8    | 2.466115E-04  | -1.841046E-04 | -2.789220E-06 |
| 13    | H32   | 1.183894E-04  | -1.492649E-07 | 7.505712E-05  |
| 14    | C10   | -1.088954E-04 | -3.050312E-04 | 3.274031E-05  |
| 15    | N2    | -2.361920E-04 | -2.591109E-04 | -1.990486E-04 |
| 16    | C9    | -2.497903E-04 | 2.943137E-04  | -9.796197E-05 |
| 17    | O1    | 1.494034E-04  | 2.322840E-04  | 5.475614E-04  |
| 18    | H43   | 2.600056E-05  | 3.197115E-04  | 1.694046E-04  |
| 19    | C12   | -4.228763E-04 | 6.821343E-04  | 9.625218E-05  |
| 20    | C11   | 5.009918E-04  | 9.438437E-05  | -1.252887E-04 |
| 21    | C19   | 1.971033E-04  | -5.222753E-04 | -9.278954E-06 |
| 22    | C13   | 6.038922E-05  | -2.142518E-05 | -4.345160E-05 |
| 23    | C14   | 8.153282E-04  | -1.398940E-04 | -2.323116E-04 |
| 24    | C15   | 2.480760E-05  | -5.737902E-04 | -8.793533E-05 |
| 25    | C16   | -2.556205E-04 | 8.766221E-05  | 2.826419E-04  |
| 26    | C17   | -7.535824E-04 | 1.782726E-04  | 3.604845E-04  |
| 27    | H49   | 2.093788E-04  | 9.060593E-05  | 2.126575E-05  |
| 28    | H50   | 1.481243E-05  | 3.272972E-05  | -7.716648E-05 |
| 29    | H51   | 3.048751E-04  | -1.315100E-04 | -1.100336E-04 |
| 30    | H52   | -2.503398E-04 | -4.975195E-05 | 1.524432E-05  |
| 31    | H53   | -3.700165E-05 | -2.203874E-05 | 1.048956E-04  |
| 32    | H1    | 3.894079E-04  | 5.726540E-05  | 2.053742E-04  |
| 33    | H2    | -1.556112E-04 | -6.858125E-05 | 1.288347E-04  |
| 34    | H3    | -5.878188E-04 | 7.010178E-04  | 1.067378E-04  |
| 35    | H4    | -1.286037E-04 | 1.323384E-04  | 2.160125E-04  |
| total |       | -5.320828E-04 | 1.278759E-03  | 1.417648E-03  |

end of program derlb

start of program geopt 14

geometry optimization step 14

the energy is increasing and lowest energy was more than two iters back  
.

```
[ turning on trust-radius adjustment ]
reading input hessian of dimension 105
  in five columns format
reading input hessian of dimension 105
  in five columns format
reading input hessian of dimension 105
  in five columns format
** restarting optimization from step 11 **
```

```
energy change:          -5.9668E-05 . ( 5.0000E-05 )
gradient maximum:       2.7460E-03 . ( 4.5000E-04 )
```

```

gradient rms:          6.1862E-04 . ( 3.0000E-04 )
step size:    0.10441  trust radius:    0.15000
displacement maximum:  4.0660E-02 . ( 1.8000E-03 )
displacement rms:      9.3389E-03 . ( 1.2000E-03 )
predicted energy change: -8.6925E-05  geom step:  1.0441E-01  full step:
1.0441E-01
molecular structure not yet converged...

```

```

center of mass moved by:
  x:    -1.6653E-16    y:    -5.2736E-16    z:    -5.5511E-16

```

new geometry:

|      | angstroms     |               |               |
|------|---------------|---------------|---------------|
| atom | x             | y             | z             |
| H25  | 0.9715887888  | 2.0064928669  | -4.1681976290 |
| C1   | 1.4966283010  | 2.0538213252  | -3.2349789190 |
| C2   | 2.8972095262  | 2.2030389824  | -0.7829284628 |
| C3   | 1.2155229947  | 1.1516447003  | -2.2169710276 |
| C4   | 2.4666121697  | 3.0144107691  | -3.0197543180 |
| C5   | 3.1614273275  | 3.0877726973  | -1.8078830205 |
| C6   | 1.9235507522  | 1.2498604204  | -1.0096146466 |
| C7   | 0.2815940008  | 0.0276098562  | -2.0899943305 |
| H27  | 2.6952795850  | 3.7180502409  | -3.7949084686 |
| H28  | 3.9096047975  | 3.8435217998  | -1.6745107867 |
| H30  | 3.4072076158  | 2.2331024230  | 0.1567619932  |
| C8   | 0.4613947828  | -0.4853898844 | -0.8655314237 |
| H32  | -0.4145138032 | -0.2966773894 | -2.8288468681 |
| C10  | -0.0788354461 | -1.5532330514 | 0.0569438632  |
| N2   | 1.4500755708  | 0.2367776120  | -0.1955507463 |
| C9   | 1.7646362376  | -0.2320410488 | 1.0590265144  |
| O1   | 2.5330447844  | 0.2882322622  | 1.8355653230  |
| H43  | -0.0710249041 | -2.5179716080 | -0.4312574566 |
| C12  | -1.4966273085 | -1.2423886106 | 0.5109448423  |
| C11  | 0.9816192815  | -1.5410214900 | 1.2259898323  |
| C19  | 0.4636878689  | -1.7097856316 | 2.6557765545  |
| C13  | -3.7215514039 | -1.9993794701 | 1.0434403894  |
| C14  | -3.1598728119 | 0.3133601179  | 1.2901797719  |
| C15  | -4.0884173080 | -0.7118738702 | 1.3882350616  |
| C16  | -1.8755160919 | 0.0507904949  | 0.8510288399  |
| C17  | -2.4309824101 | -2.2608717223 | 0.6077351319  |
| H49  | -4.4338672003 | -2.7975024969 | 1.1079199859  |
| H50  | -3.4380169530 | 1.3150348310  | 1.5501650088  |
| H51  | -5.0849480843 | -0.5051905932 | 1.7241501582  |
| H52  | -1.1688920771 | 0.8509646167  | 0.7608462131  |
| H53  | -2.1563158873 | -3.2625827431 | 0.3382229938  |
| H1   | 1.2945824471  | -1.6085448627 | 3.3420044008  |
| H2   | 0.0160083860  | -2.6869158952 | 2.7875796078  |
| H3   | -0.2761293950 | -0.9608532730 | 2.8941412473  |
| H4   | 1.7016389697  | -2.3275795861 | 1.0180796769  |

nuclear repulsion energy..... 1458.206394548 hartrees

/ end of geometry optimization iteration 14 /

end of program geopt

```

start of program onee
smallest eigenvalue of S:    1.218E-03
number of canonical orbitals.....    210
end of program onee

```

start of program probe  
end of program probe

start of program grid

number of gridpoints:

| atom     | H25 | C1  | C2  | C3  | C4  | C5  | C6  | C7  |
|----------|-----|-----|-----|-----|-----|-----|-----|-----|
| grid # 1 | 73  | 89  | 87  | 90  | 87  | 87  | 84  | 85  |
| grid # 2 | 106 | 100 | 97  | 98  | 98  | 99  | 90  | 92  |
| grid # 3 | 224 | 183 | 182 | 194 | 182 | 182 | 187 | 182 |
| grid # 4 | 224 | 379 | 380 | 406 | 379 | 379 | 374 | 378 |

number of gridpoints:

| atom     | H27 | H28 | H30 | C8  | H32 | C10 | N2  | C9  |
|----------|-----|-----|-----|-----|-----|-----|-----|-----|
| grid # 1 | 73  | 73  | 73  | 86  | 73  | 81  | 99  | 76  |
| grid # 2 | 106 | 106 | 105 | 92  | 106 | 93  | 109 | 81  |
| grid # 3 | 224 | 224 | 220 | 187 | 223 | 175 | 223 | 163 |
| grid # 4 | 224 | 224 | 219 | 375 | 229 | 350 | 400 | 330 |

number of gridpoints:

| atom     | O1  | H43 | C12 | C11 | C19 | C13 | C14 | C15 |
|----------|-----|-----|-----|-----|-----|-----|-----|-----|
| grid # 1 | 111 | 69  | 90  | 80  | 71  | 87  | 87  | 89  |
| grid # 2 | 127 | 97  | 106 | 91  | 76  | 100 | 99  | 100 |
| grid # 3 | 272 | 211 | 192 | 176 | 150 | 182 | 182 | 182 |
| grid # 4 | 475 | 206 | 397 | 361 | 305 | 378 | 379 | 378 |

number of gridpoints:

| atom     | C16 | C17 | H49 | H50 | H51 | H52 | H53 | H1  |
|----------|-----|-----|-----|-----|-----|-----|-----|-----|
| grid # 1 | 86  | 85  | 73  | 73  | 73  | 71  | 72  | 71  |
| grid # 2 | 97  | 99  | 106 | 106 | 106 | 100 | 103 | 99  |
| grid # 3 | 181 | 182 | 224 | 223 | 224 | 216 | 216 | 220 |
| grid # 4 | 376 | 377 | 224 | 223 | 224 | 211 | 215 | 221 |

number of gridpoints:

| atom     | H2  | H3  | H4  | total |
|----------|-----|-----|-----|-------|
| grid # 1 | 72  | 71  | 69  | 2816  |
| grid # 2 | 99  | 97  | 100 | 3486  |
| grid # 3 | 219 | 214 | 219 | 7040  |
| grid # 4 | 221 | 212 | 210 | 10843 |

end of program grid

start of program rwr

recomputing Rwr matrix 8 grid: 4  
recomputing Rwr matrix 15 grid: 4  
end of program rwr

start of program scf

|      | i | u | d | i | g |                  |               |                    |                    |  |  |
|------|---|---|---|---|---|------------------|---------------|--------------------|--------------------|--|--|
|      | t | p | i | c | r |                  |               |                    |                    |  |  |
|      | e | d | i | u | i |                  |               |                    |                    |  |  |
|      | r | t | s | t | d | total energy     | energy change | RMS density change | maximum DIIS error |  |  |
| etot | 1 | N | N | 2 | U | -815.14095613282 |               | 6.6E-05            | 9.5E-04            |  |  |
| etot | 2 | Y | Y | 6 | M | -815.14103547368 | 7.9E-05       | 1.7E-05            | 3.7E-04            |  |  |
| etot | 3 | Y | Y | 6 | M | -815.14105073503 | 1.5E-05       | 6.2E-06            | 1.2E-04            |  |  |

```

etot   4   Y   Y   6   M  -815.14104947192 -1.3E-06  3.0E-06  5.5E-05
etot   5   Y   N   6   M  -815.14105019647  7.2E-07  0.0E+00  0.0E+00

```

Energy components, in hartrees:

```

(A) Nuclear repulsion..... 1458.20639454760
(E) Total one-electron terms..... -4001.97464933021
(I) Total two-electron terms..... 1728.62720458614
(L) Electronic energy..... -2273.34744474407 (E+I)
(N) Total energy..... -815.14105019647 (A+L)

```

SCFE: SCF energy: HF -815.14105019647 hartrees iterations: 5

HOMO energy: -0.29744

LUMO energy: 0.11757

Orbital energies:

```

-20.45373 -15.55228 -11.32176 -11.23588 -11.22318 -11.21516
-11.20812 -11.19965 -11.18813 -11.18568 -11.18517 -11.18442
-11.18298 -11.18248 -11.17950 -11.17774 -11.17720 -11.17604
-11.17270 -11.16458 -1.42295 -1.33360 -1.18048 -1.16233
-1.11399 -1.08825 -1.03831 -1.02691 -1.01965 -1.00163
-0.94892 -0.90517 -0.85240 -0.84402 -0.83048 -0.81127
-0.79148 -0.76041 -0.72218 -0.68648 -0.68142 -0.66774
-0.65701 -0.64287 -0.64020 -0.62501 -0.61385 -0.60760
-0.60468 -0.60055 -0.59255 -0.58292 -0.55151 -0.55046
-0.53300 -0.52486 -0.51627 -0.51336 -0.49869 -0.49484
-0.48924 -0.48524 -0.45834 -0.42199 -0.39453 -0.34878
-0.34251 -0.31538 -0.29744 0.11757 0.13202 0.14138
0.14361 0.20482 0.22191 0.26530 0.27164 0.28085
0.30584

```

end of program scf

start of program derla

end of program derla

start of program rwr

recomputing RwR matrix 8 grid: 4

recomputing RwR matrix 15 grid: 4

end of program rwr

start of program derlb

forces (hartrees/bohr) : total

| atom | label | x             | y             | z             |
|------|-------|---------------|---------------|---------------|
| 1    | H25   | 7.642063E-05  | 2.228009E-05  | -5.784614E-05 |
| 2    | C1    | 1.990428E-04  | 4.592703E-04  | 3.392988E-04  |
| 3    | C2    | -4.355800E-04 | -2.759023E-04 | 2.627708E-04  |
| 4    | C3    | 3.616522E-04  | 3.096878E-04  | -5.668802E-05 |
| 5    | C4    | 6.743136E-05  | -2.178968E-04 | -2.124141E-04 |
| 6    | C5    | -4.485339E-04 | 3.675195E-05  | -4.929463E-04 |
| 7    | C6    | -3.983617E-04 | 1.033620E-04  | -3.776749E-04 |
| 8    | C7    | 3.606249E-05  | 5.311642E-04  | -3.250841E-04 |
| 9    | H27   | -3.453411E-05 | 7.310908E-05  | -1.515938E-04 |
| 10   | H28   | -2.288304E-04 | -9.263876E-05 | -6.446956E-05 |

|       |       |               |               |               |
|-------|-------|---------------|---------------|---------------|
| 11    | H30   | 3.214381E-05  | 4.893072E-05  | 1.421391E-04  |
| 12    | C8    | -1.837265E-04 | -4.297444E-04 | 3.247033E-04  |
| 13    | H32   | 7.099220E-05  | -4.485450E-05 | 1.251749E-05  |
| 14    | C10   | 1.931686E-04  | 3.975476E-05  | -9.584003E-05 |
| 15    | N2    | 1.112921E-03  | 2.295018E-05  | 8.860574E-04  |
| 16    | C9    | 7.074941E-04  | 1.485733E-03  | 1.572049E-03  |
| 17    | O1    | -1.768044E-03 | -1.325477E-03 | -1.848039E-03 |
| 18    | H43   | 8.249322E-05  | 1.864236E-05  | 4.033652E-05  |
| 19    | C12   | -1.968266E-04 | 2.018880E-04  | 2.938186E-04  |
| 20    | C11   | -1.705260E-04 | 1.772935E-04  | 4.573836E-04  |
| 21    | C19   | 3.486310E-04  | -5.211619E-04 | -7.112175E-05 |
| 22    | C13   | 2.400181E-04  | 4.842769E-05  | -1.513940E-04 |
| 23    | C14   | 5.937683E-04  | -9.760248E-05 | -2.094124E-04 |
| 24    | C15   | 9.990594E-05  | -2.137299E-04 | -1.623275E-05 |
| 25    | C16   | -5.251307E-04 | 1.050158E-04  | 2.914697E-04  |
| 26    | C17   | -3.153649E-04 | -7.684957E-05 | 1.633692E-04  |
| 27    | H49   | -1.176554E-05 | -1.758050E-04 | 3.844575E-05  |
| 28    | H50   | 1.228499E-05  | 1.699379E-04  | -1.854845E-05 |
| 29    | H51   | 8.262888E-05  | -8.675548E-05 | -2.379603E-05 |
| 30    | H52   | -3.661522E-05 | 3.368161E-04  | 8.394570E-05  |
| 31    | H53   | -3.525729E-05 | -8.316147E-05 | 1.209114E-04  |
| 32    | H1    | 1.542859E-04  | 8.677659E-05  | 2.735419E-04  |
| 33    | H2    | -1.146601E-04 | 1.219578E-04  | 6.468406E-05  |
| 34    | H3    | -2.078806E-04 | 4.660569E-04  | 2.260729E-06  |
| 35    | H4    | -1.083501E-04 | -1.211125E-04 | 1.125285E-04  |
| ----- |       |               |               |               |
|       | total | -7.486429E-04 | 1.103115E-03  | 1.309130E-03  |

end of program der1b

start of program geopt 15

geometry optimization step 15

reading input hessian of dimension 105  
in five columns format

reading input hessian of dimension 105  
in five columns format

reading input hessian of dimension 105  
in five columns format

energy change: -2.1843E-05 \* ( 5.0000E-05 )

gradient maximum: 2.9280E-03 . ( 4.5000E-04 )

gradient rms: 3.9444E-04 . ( 3.0000E-04 )

step size: 0.03577 trust radius: 0.15000

displacement maximum: 1.0946E-02 . ( 1.8000E-03 )

displacement rms: 3.1992E-03 . ( 1.2000E-03 )

predicted energy change: -2.4323E-05 geom step: 3.5768E-02 full step:  
3.5768E-02

molecular structure not yet converged...

center of mass moved by:

x: 1.3877E-03 y: -2.6169E-04 z: -1.1880E-04

new geometry:

|      | angstroms    |              |               |
|------|--------------|--------------|---------------|
| atom | x            | y            | z             |
| H25  | 0.9628770552 | 2.0193285669 | -4.1638889067 |
| C1   | 1.4935408546 | 2.0623282836 | -3.2334932157 |
| C2   | 2.9084026940 | 2.1969390307 | -0.7900338448 |
| C3   | 1.2123962294 | 1.1610553684 | -2.2142601873 |

|     |               |               |               |
|-----|---------------|---------------|---------------|
| C4  | 2.4729218265  | 3.0129449231  | -3.0261256242 |
| C5  | 3.1731896506  | 3.0796062625  | -1.8177301723 |
| C6  | 1.9278151831  | 1.2510106110  | -1.0110563088 |
| C7  | 0.2723376428  | 0.0434054291  | -2.0831797484 |
| H27 | 2.7035328033  | 3.7141323690  | -3.8032171072 |
| H28 | 3.9285309058  | 3.8281887399  | -1.6886578631 |
| H30 | 3.4262187959  | 2.2222081320  | 0.1459155375  |
| C8  | 0.4582127908  | -0.4767817257 | -0.8617184970 |
| H32 | -0.4295514713 | -0.2755250135 | -2.8189013667 |
| C10 | -0.0804255394 | -1.5470660706 | 0.0587490318  |
| N2  | 1.4549983983  | 0.2385676904  | -0.1950029308 |
| C9  | 1.7678083254  | -0.2316129189 | 1.0596452197  |
| O1  | 2.5417082210  | 0.2812914585  | 1.8329451566  |
| H43 | -0.0687009551 | -2.5103983857 | -0.4324051712 |
| C12 | -1.4994123676 | -1.2420340897 | 0.5128222978  |
| C11 | 0.9780612527  | -1.5367210779 | 1.2295799135  |
| C19 | 0.4584760543  | -1.6981362334 | 2.6602424141  |
| C13 | -3.7210956272 | -2.0112965750 | 1.0370260412  |
| C14 | -3.1691895230 | 0.3031592205  | 1.2955681002  |
| C15 | -4.0933246835 | -0.7266847030 | 1.3870054683  |
| C16 | -1.8836559926 | 0.0484861183  | 0.8580798504  |
| C17 | -2.4292538227 | -2.2653746048 | 0.6032469423  |
| H49 | -4.4298683505 | -2.8132013080 | 1.0969139577  |
| H50 | -3.4520037927 | 1.3027746385  | 1.5592426993  |
| H51 | -5.0910323376 | -0.5260510861 | 1.7220405431  |
| H52 | -1.1808884116 | 0.8527344319  | 0.7730126864  |
| H53 | -2.1499072007 | -3.2650752120 | 0.3305864403  |
| H1  | 1.2901676011  | -1.6092180497 | 3.3466612018  |
| H2  | -0.0046746319 | -2.6670391758 | 2.7931406310  |
| H3  | -0.2696325560 | -0.9367322987 | 2.8974733967  |
| H4  | 1.6931232446  | -2.3296832421 | 1.0257831728  |

nuclear repulsion energy..... 1457.800540722 hartrees

/ end of geometry optimization iteration 15 /

end of program geopt

start of program onee  
smallest eigenvalue of S: 1.215E-03  
number of canonical orbitals..... 210  
end of program onee

start of program probe  
end of program probe

start of program grid

number of gridpoints:

|          |     |     |     |     |     |     |     |     |
|----------|-----|-----|-----|-----|-----|-----|-----|-----|
| atom     | H25 | C1  | C2  | C3  | C4  | C5  | C6  | C7  |
| grid # 1 | 73  | 89  | 87  | 90  | 87  | 87  | 84  | 85  |
| grid # 2 | 106 | 99  | 97  | 98  | 98  | 98  | 90  | 92  |
| grid # 3 | 224 | 183 | 182 | 194 | 182 | 182 | 187 | 183 |
| grid # 4 | 224 | 379 | 382 | 406 | 379 | 379 | 372 | 378 |

number of gridpoints:

|          |     |     |     |    |     |     |    |    |
|----------|-----|-----|-----|----|-----|-----|----|----|
| atom     | H27 | H28 | H30 | C8 | H32 | C10 | N2 | C9 |
| grid # 1 | 73  | 73  | 73  | 86 | 73  | 82  | 99 | 76 |

|          |     |     |     |     |     |     |     |     |
|----------|-----|-----|-----|-----|-----|-----|-----|-----|
| grid # 2 | 106 | 106 | 105 | 92  | 106 | 93  | 109 | 81  |
| grid # 3 | 224 | 224 | 220 | 188 | 223 | 175 | 223 | 163 |
| grid # 4 | 224 | 224 | 219 | 377 | 229 | 351 | 400 | 331 |

number of gridpoints:

|          |     |     |     |     |     |     |     |     |
|----------|-----|-----|-----|-----|-----|-----|-----|-----|
| atom     | O1  | H43 | C12 | C11 | C19 | C13 | C14 | C15 |
| grid # 1 | 111 | 69  | 90  | 80  | 71  | 87  | 86  | 89  |
| grid # 2 | 123 | 98  | 106 | 90  | 75  | 100 | 99  | 100 |
| grid # 3 | 272 | 211 | 192 | 175 | 142 | 182 | 182 | 182 |
| grid # 4 | 476 | 205 | 397 | 361 | 309 | 378 | 379 | 378 |

number of gridpoints:

|          |     |     |     |     |     |     |     |     |
|----------|-----|-----|-----|-----|-----|-----|-----|-----|
| atom     | C16 | C17 | H49 | H50 | H51 | H52 | H53 | H1  |
| grid # 1 | 86  | 85  | 73  | 73  | 73  | 71  | 72  | 71  |
| grid # 2 | 97  | 99  | 106 | 106 | 106 | 100 | 103 | 99  |
| grid # 3 | 181 | 182 | 224 | 223 | 224 | 216 | 216 | 220 |
| grid # 4 | 376 | 377 | 224 | 223 | 224 | 211 | 215 | 221 |

number of gridpoints:

|          |     |     |     |       |
|----------|-----|-----|-----|-------|
| atom     | H2  | H3  | H4  | total |
| grid # 1 | 72  | 71  | 69  | 2816  |
| grid # 2 | 99  | 97  | 100 | 3479  |
| grid # 3 | 219 | 214 | 218 | 7032  |
| grid # 4 | 220 | 212 | 210 | 10850 |

end of program grid

start of program rwr

|                        |    |       |   |
|------------------------|----|-------|---|
| recomputing Rwr matrix | 2  | grid: | 4 |
| recomputing Rwr matrix | 8  | grid: | 4 |
| recomputing Rwr matrix | 15 | grid: | 4 |
| end of program rwr     |    |       |   |

start of program scf

|      |   |   |   |   |   |                  |               |                    |                    |
|------|---|---|---|---|---|------------------|---------------|--------------------|--------------------|
|      | i | u | d | i | g |                  |               |                    |                    |
|      | t | p | i | c | r |                  |               |                    |                    |
|      | e | d | i | u | i |                  |               |                    |                    |
|      | r | t | s | t | d | total energy     | energy change | RMS density change | maximum DIIS error |
| etot | 1 | N | N | 1 | U | -815.14041016071 |               | 1.4E-04            | 3.0E-03            |
| etot | 2 | Y | Y | 4 | M | -815.14085786302 | 4.5E-04       | 4.1E-05            | 1.2E-03            |
| etot | 3 | Y | Y | 4 | M | -815.14090804473 | 5.0E-05       | 1.4E-05            | 3.7E-04            |
| etot | 4 | Y | Y | 4 | M | -815.14091171062 | 3.7E-06       | 5.5E-06            | 1.2E-04            |
| etot | 5 | Y | Y | 4 | M | -815.14091325030 | 1.5E-06       | 2.1E-06            | 4.1E-05            |
| etot | 6 | N | N | 1 | U | -815.14090435872 | -8.9E-06      | 0.0E+00            | 0.0E+00            |

Energy components, in hartrees:

|     |                               |                   |       |
|-----|-------------------------------|-------------------|-------|
| (A) | Nuclear repulsion.....        | 1457.80054072206  |       |
| (E) | Total one-electron terms..... | -4001.16714833897 |       |
| (I) | Total two-electron terms..... | 1728.22570325819  |       |
| (L) | Electronic energy.....        | -2272.94144508078 | (E+I) |
| (N) | Total energy.....             | -815.14090435872  | (A+L) |

SCFE: SCF energy: HF      -815.14090435872 hartrees      iterations:      6

|              |          |
|--------------|----------|
| HOMO energy: | -0.29705 |
| LUMO energy: | 0.11774  |

Orbital energies:

|           |           |           |           |           |           |
|-----------|-----------|-----------|-----------|-----------|-----------|
| -20.45374 | -15.55209 | -11.32164 | -11.23584 | -11.22308 | -11.21498 |
| -11.20807 | -11.19966 | -11.18800 | -11.18558 | -11.18509 | -11.18437 |
| -11.18290 | -11.18249 | -11.17932 | -11.17760 | -11.17711 | -11.17586 |
| -11.17256 | -11.16456 | -1.42389  | -1.33330  | -1.18049  | -1.16245  |
| -1.11390  | -1.08794  | -1.03813  | -1.02722  | -1.01994  | -1.00124  |
| -0.94886  | -0.90497  | -0.85234  | -0.84386  | -0.83058  | -0.81113  |
| -0.79143  | -0.76042  | -0.72213  | -0.68649  | -0.68142  | -0.66780  |
| -0.65703  | -0.64303  | -0.64002  | -0.62498  | -0.61373  | -0.60780  |
| -0.60451  | -0.60085  | -0.59226  | -0.58286  | -0.55150  | -0.55045  |
| -0.53310  | -0.52493  | -0.51633  | -0.51330  | -0.49869  | -0.49487  |
| -0.48936  | -0.48503  | -0.45840  | -0.42192  | -0.39440  | -0.34901  |
| -0.34232  | -0.31571  | -0.29705  | 0.11774   | 0.13225   | 0.14149   |
| 0.14375   | 0.20517   | 0.22168   | 0.26533   | 0.27166   | 0.28102   |
| 0.30599   |           |           |           |           |           |

end of program scf

start of program derla

end of program derla

start of program rwr

recomputing RwR matrix 2 grid: 4

recomputing RwR matrix 8 grid: 4

recomputing RwR matrix 15 grid: 4

end of program rwr

start of program derlb

forces (hartrees/bohr) : total

| atom | label | x             | y             | z             |
|------|-------|---------------|---------------|---------------|
| 1    | H25   | -6.436108E-05 | -1.190955E-04 | 6.848711E-05  |
| 2    | C1    | -9.552618E-04 | -7.122507E-04 | -9.032131E-04 |
| 3    | C2    | 5.385183E-04  | 5.841831E-04  | -1.271506E-04 |
| 4    | C3    | -2.594356E-04 | -1.934042E-04 | 3.587599E-04  |
| 5    | C4    | 4.563910E-04  | 6.140661E-04  | 2.899082E-04  |
| 6    | C5    | 2.174784E-04  | -2.104989E-05 | 4.781555E-04  |
| 7    | C6    | -1.947910E-04 | -4.885665E-05 | 1.538015E-04  |
| 8    | C7    | -2.740086E-05 | -5.570203E-04 | 1.850285E-05  |
| 9    | H27   | -1.218011E-05 | 3.858357E-06  | 7.199887E-05  |
| 10   | H28   | 9.360981E-05  | 2.334213E-04  | 7.058816E-05  |
| 11   | H30   | -1.226692E-04 | 2.266955E-04  | -7.441474E-05 |
| 12   | C8    | -8.478174E-05 | 5.354356E-04  | 2.663392E-05  |
| 13   | H32   | 2.846009E-06  | -4.375968E-05 | 4.567013E-05  |
| 14   | C10   | -1.335133E-04 | 1.464726E-04  | 2.164126E-04  |
| 15   | N2    | -1.706169E-04 | -2.774102E-05 | -2.559249E-04 |
| 16   | C9    | 2.031810E-04  | -3.612411E-04 | -2.496135E-04 |
| 17   | O1    | -1.688275E-04 | 2.466108E-04  | 2.615854E-04  |
| 18   | H43   | -9.358747E-05 | 4.085757E-05  | 1.249766E-04  |
| 19   | C12   | 1.510792E-04  | 7.532251E-06  | -1.071990E-04 |
| 20   | C11   | 2.475192E-04  | -1.300633E-04 | 2.487299E-05  |
| 21   | C19   | -1.064998E-04 | 5.635889E-04  | -4.615977E-04 |
| 22   | C13   | -2.772288E-04 | 1.300808E-04  | 1.988728E-04  |
| 23   | C14   | -1.195257E-04 | 1.142410E-04  | 4.288076E-05  |
| 24   | C15   | -9.268623E-05 | -2.790353E-04 | -4.680051E-06 |
| 25   | C16   | 1.558280E-04  | -3.700738E-04 | -7.645453E-05 |



|       |       |               |               |               |
|-------|-------|---------------|---------------|---------------|
| 26    | C17   | 1.714749E-04  | 3.179176E-05  | 4.482059E-05  |
| 27    | H49   | -2.724407E-05 | 4.312251E-05  | 5.724637E-05  |
| 28    | H50   | -6.332008E-05 | -5.325421E-06 | -2.415754E-06 |
| 29    | H51   | -1.679837E-04 | 1.935835E-05  | 4.655891E-05  |
| 30    | H52   | 9.739645E-05  | 1.497840E-04  | -2.923301E-05 |
| 31    | H53   | 4.553215E-05  | 7.647045E-05  | 6.076668E-05  |
| 32    | H1    | 3.795902E-04  | 1.413362E-04  | 3.122034E-04  |
| 33    | H2    | -2.545972E-04 | -3.364018E-04 | 2.978531E-05  |
| 34    | H3    | -6.628000E-05 | 1.120113E-04  | 1.456635E-04  |
| 35    | H4    | -1.355503E-04 | 4.770405E-04  | 1.340745E-04  |
| ----- |       |               |               |               |
|       | total | -8.378977E-04 | 1.292641E-03  | 9.913298E-04  |

end of program derlb

start of program geopt 16

geometry optimization step 16

reading input hessian of dimension 105  
in five columns format

reading input hessian of dimension 105  
in five columns format

reading input hessian of dimension 105  
in five columns format

energy change: 1.4584E-04 . ( 5.0000E-05 )

gradient maximum: 1.3500E-03 . ( 4.5000E-04 )

gradient rms: 2.4088E-04 \* ( 3.0000E-04 )

step size: 0.04650 trust radius: 0.07500

displacement maximum: 1.7065E-02 . ( 1.8000E-03 )

displacement rms: 4.1592E-03 . ( 1.2000E-03 )

predicted energy change: -1.3638E-05 geom step: 4.6501E-02 full step:  
4.6501E-02

molecular structure not yet converged...

center of mass moved by:

x: -3.2655E-03 y: 2.5025E-03 z: 1.2806E-03

new geometry:

|      | angstroms     |               |               |
|------|---------------|---------------|---------------|
| atom | x             | y             | z             |
| H25  | 0.9809504977  | 1.9933633407  | -4.1773919824 |
| C1   | 1.5015608236  | 2.0467844734  | -3.2418443144 |
| C2   | 2.8915159352  | 2.2088818154  | -0.7842208154 |
| C3   | 1.2180173127  | 1.1496249911  | -2.2196942299 |
| C4   | 2.4709195136  | 3.0080766602  | -3.0285881900 |
| C5   | 3.1588218880  | 3.0881696194  | -1.8135825205 |
| C6   | 1.9209656114  | 1.2528515514  | -1.0099662465 |
| C7   | 0.2856870098  | 0.0249000417  | -2.0919890851 |
| H27  | 2.7032649371  | 3.7073316316  | -3.8070056423 |
| H28  | 3.9056076874  | 3.8450800813  | -1.6806767799 |
| H30  | 3.3989878477  | 2.2451195857  | 0.1571008386  |
| C8   | 0.4625420086  | -0.4849782956 | -0.8649112239 |
| H32  | -0.4064527433 | -0.3039244030 | -2.8327662809 |
| C10  | -0.0777143108 | -1.5523720273 | 0.0576985200  |
| N2   | 1.4488571985  | 0.2405964825  | -0.1932018788 |
| C9   | 1.7579802025  | -0.2263947030 | 1.0638170614  |
| O1   | 2.5209988575  | 0.2942832667  | 1.8424136825  |
| H43  | -0.0700832373 | -2.5173417783 | -0.4304175571 |
| C12  | -1.4949180759 | -1.2413892368 | 0.5129493676  |

|     |               |               |              |
|-----|---------------|---------------|--------------|
| C11 | 0.9811773400  | -1.5398482564 | 1.2270907973 |
| C19 | 0.4659579500  | -1.7178383191 | 2.6568353895 |
| C13 | -3.7222254631 | -1.9981252113 | 1.0329216537 |
| C14 | -3.1549314258 | 0.3109585359  | 1.3030473642 |
| C15 | -4.0861862206 | -0.7131167138 | 1.3891999051 |
| C16 | -1.8709214494 | 0.0498545045  | 0.8645245825 |
| C17 | -2.4314927785 | -2.2586745468 | 0.5982152992 |
| H49 | -4.4365138582 | -2.7954896888 | 1.0884376683 |
| H50 | -3.4309460803 | 1.3110397472  | 1.5719954712 |
| H51 | -5.0828851243 | -0.5073983284 | 1.7251130478 |
| H52 | -1.1627481673 | 0.8502299116  | 0.7839994527 |
| H53 | -2.1587629174 | -3.2587445123 | 0.3207055370 |
| H1  | 1.2980171047  | -1.6270403360 | 3.3432357362 |
| H2  | 0.0115670538  | -2.6923926226 | 2.7817438135 |
| H3  | -0.2684937664 | -0.9654949508 | 2.9022079174 |
| H4  | 1.7040615676  | -2.3234022778 | 1.0152955883 |

nuclear repulsion energy..... 1458.164269921 hartrees

/ end of geometry optimization iteration 16 /

end of program geopt

start of program onee  
smallest eigenvalue of S: 1.218E-03  
number of canonical orbitals..... 210  
end of program onee

start of program probe  
end of program probe

start of program grid

number of gridpoints:

|          |     |     |     |     |     |     |     |     |
|----------|-----|-----|-----|-----|-----|-----|-----|-----|
| atom     | H25 | C1  | C2  | C3  | C4  | C5  | C6  | C7  |
| grid # 1 | 73  | 89  | 87  | 90  | 87  | 87  | 84  | 85  |
| grid # 2 | 106 | 100 | 97  | 98  | 98  | 98  | 90  | 92  |
| grid # 3 | 224 | 183 | 182 | 194 | 182 | 182 | 187 | 183 |
| grid # 4 | 224 | 379 | 383 | 406 | 379 | 379 | 373 | 378 |

number of gridpoints:

|          |     |     |     |     |     |     |     |     |
|----------|-----|-----|-----|-----|-----|-----|-----|-----|
| atom     | H27 | H28 | H30 | C8  | H32 | C10 | N2  | C9  |
| grid # 1 | 73  | 73  | 73  | 86  | 73  | 81  | 99  | 76  |
| grid # 2 | 106 | 106 | 105 | 92  | 106 | 93  | 109 | 81  |
| grid # 3 | 224 | 224 | 220 | 188 | 223 | 175 | 223 | 163 |
| grid # 4 | 224 | 224 | 219 | 377 | 229 | 351 | 401 | 328 |

number of gridpoints:

|          |     |     |     |     |     |     |     |     |
|----------|-----|-----|-----|-----|-----|-----|-----|-----|
| atom     | O1  | H43 | C12 | C11 | C19 | C13 | C14 | C15 |
| grid # 1 | 111 | 69  | 90  | 80  | 71  | 87  | 86  | 89  |
| grid # 2 | 123 | 98  | 105 | 91  | 75  | 100 | 99  | 100 |
| grid # 3 | 272 | 211 | 192 | 175 | 143 | 182 | 182 | 182 |
| grid # 4 | 475 | 205 | 398 | 361 | 302 | 378 | 379 | 378 |

number of gridpoints:

|          |     |     |     |     |     |     |     |    |
|----------|-----|-----|-----|-----|-----|-----|-----|----|
| atom     | C16 | C17 | H49 | H50 | H51 | H52 | H53 | H1 |
| grid # 1 | 86  | 85  | 73  | 73  | 73  | 71  | 72  | 71 |
| grid # 2 | 97  | 99  | 106 | 106 | 106 | 100 | 103 | 99 |

|          |     |     |     |     |     |     |     |     |
|----------|-----|-----|-----|-----|-----|-----|-----|-----|
| grid # 3 | 181 | 182 | 224 | 223 | 224 | 216 | 216 | 220 |
| grid # 4 | 376 | 377 | 224 | 223 | 224 | 211 | 215 | 221 |

number of gridpoints:

|          |     |     |     |       |
|----------|-----|-----|-----|-------|
| atom     | H2  | H3  | H4  | total |
| grid # 1 | 72  | 71  | 69  | 2815  |
| grid # 2 | 99  | 97  | 100 | 3480  |
| grid # 3 | 219 | 214 | 219 | 7034  |
| grid # 4 | 220 | 212 | 210 | 10843 |

end of program grid

start of program rwr

recomputing Rwr matrix 15 grid: 4

end of program rwr

start of program scf

|      | i | u | d | i | g |                  |          | RMS     | maximum |
|------|---|---|---|---|---|------------------|----------|---------|---------|
|      | t | p | i | c | r |                  |          | density | DIIS    |
|      | e | d | i | u | i |                  | energy   | change  | error   |
|      | r | t | s | t | d | total energy     | change   |         |         |
| etot | 1 | N | N | 1 | U | -815.13986953342 |          | 2.3E-04 | 4.7E-03 |
| etot | 2 | Y | Y | 4 | M | -815.14072515920 | 8.6E-04  | 5.9E-05 | 1.9E-03 |
| etot | 3 | Y | Y | 4 | M | -815.14082701500 | 1.0E-04  | 2.0E-05 | 5.8E-04 |
| etot | 4 | Y | Y | 4 | M | -815.14083598704 | 9.0E-06  | 4.7E-06 | 1.1E-04 |
| etot | 5 | Y | N | 4 | M | -815.14083440092 | -1.6E-06 | 0.0E+00 | 0.0E+00 |

Energy components, in hartrees:

|     |                               |                   |       |
|-----|-------------------------------|-------------------|-------|
| (A) | Nuclear repulsion.....        | 1458.16426992119  |       |
| (E) | Total one-electron terms..... | -4001.89442968404 |       |
| (I) | Total two-electron terms..... | 1728.58932536193  |       |
| (L) | Electronic energy.....        | -2273.30510432211 | (E+I) |
| (N) | Total energy.....             | -815.14083440092  | (A+L) |

SCFE: SCF energy: HF -815.14083440092 hartrees iterations: 5

HOMO energy: -0.29718

LUMO energy: 0.11762

Orbital energies:

|           |           |           |           |           |           |
|-----------|-----------|-----------|-----------|-----------|-----------|
| -20.45370 | -15.55225 | -11.32170 | -11.23594 | -11.22328 | -11.21502 |
| -11.20808 | -11.19960 | -11.18803 | -11.18554 | -11.18505 | -11.18429 |
| -11.18286 | -11.18244 | -11.17945 | -11.17767 | -11.17729 | -11.17597 |
| -11.17265 | -11.16454 | -1.42404  | -1.33338  | -1.18051  | -1.16232  |
| -1.11399  | -1.08794  | -1.03814  | -1.02704  | -1.01975  | -1.00135  |
| -0.94882  | -0.90503  | -0.85225  | -0.84387  | -0.83046  | -0.81098  |
| -0.79139  | -0.76042  | -0.72223  | -0.68647  | -0.68145  | -0.66769  |
| -0.65693  | -0.64298  | -0.64014  | -0.62496  | -0.61380  | -0.60771  |
| -0.60460  | -0.60062  | -0.59238  | -0.58275  | -0.55145  | -0.55046  |
| -0.53312  | -0.52496  | -0.51629  | -0.51340  | -0.49866  | -0.49493  |
| -0.48932  | -0.48500  | -0.45833  | -0.42193  | -0.39443  | -0.34887  |
| -0.34234  | -0.31548  | -0.29718  | 0.11762   | 0.13218   | 0.14173   |
| 0.14375   | 0.20506   | 0.22177   | 0.26537   | 0.27161   | 0.28088   |
| 0.30576   |           |           |           |           |           |

end of program scf

start of program derla  
end of program derla

start of program rwr  
recomputing RWR matrix 15 grid: 4  
end of program rwr

start of program derlb

forces (hartrees/bohr) : total

| atom  | label | x             | y             | z             |
|-------|-------|---------------|---------------|---------------|
| 1     | H25   | 1.197154E-05  | -3.880915E-06 | 1.229694E-04  |
| 2     | C1    | 2.984185E-04  | 4.405875E-05  | 4.568057E-04  |
| 3     | C2    | 1.595001E-05  | 8.264179E-05  | 9.744505E-05  |
| 4     | C3    | -1.959970E-04 | -1.769603E-04 | -9.598780E-06 |
| 5     | C4    | -1.869471E-04 | -3.814459E-05 | -1.383476E-04 |
| 6     | C5    | -6.366497E-05 | 1.084360E-04  | -2.396776E-05 |
| 7     | C6    | 1.042933E-04  | 1.069312E-04  | 8.012181E-05  |
| 8     | C7    | 4.713100E-04  | -1.117033E-04 | 1.123877E-03  |
| 9     | H27   | -5.305310E-05 | -3.678573E-05 | 5.243826E-05  |
| 10    | H28   | -7.178770E-05 | 3.900799E-05  | -5.230254E-05 |
| 11    | H30   | -1.215360E-04 | 4.206664E-05  | -1.432929E-04 |
| 12    | C8    | 5.393340E-05  | 2.967724E-04  | -5.197674E-04 |
| 13    | H32   | 7.980840E-05  | 4.358165E-05  | 1.381620E-04  |
| 14    | C10   | -1.029962E-04 | -1.452853E-04 | 1.431289E-04  |
| 15    | N2    | -5.316417E-04 | -1.233132E-04 | -2.141295E-04 |
| 16    | C9    | -8.354953E-08 | -1.962254E-04 | -2.192286E-04 |
| 17    | O1    | 1.518070E-04  | 3.110927E-04  | 4.136169E-04  |
| 18    | H43   | 3.056671E-05  | 1.269001E-04  | 1.276372E-04  |
| 19    | C12   | -2.194066E-05 | 2.231110E-04  | -1.390691E-05 |
| 20    | C11   | 2.798599E-04  | -4.182236E-06 | 6.130963E-05  |
| 21    | C19   | -1.670035E-05 | 2.200723E-04  | -2.037433E-04 |
| 22    | C13   | -5.759361E-05 | -4.186729E-05 | 7.847741E-05  |
| 23    | C14   | 9.782830E-06  | 7.701788E-05  | 4.211381E-05  |
| 24    | C15   | -1.405726E-04 | -1.131644E-04 | 3.090309E-05  |
| 25    | C16   | 1.086979E-05  | -3.001966E-06 | -4.073413E-05 |
| 26    | C17   | -1.597667E-04 | -3.806436E-05 | 9.914423E-05  |
| 27    | H49   | 4.698751E-05  | 1.635266E-05  | 5.677084E-05  |
| 28    | H50   | -6.116839E-05 | 2.871414E-05  | -3.141397E-05 |
| 29    | H51   | 5.079675E-05  | -2.489822E-05 | -2.660579E-05 |
| 30    | H52   | -4.261081E-05 | -5.051763E-05 | -1.129702E-05 |
| 31    | H53   | 4.514738E-05  | -1.740629E-05 | 6.404544E-05  |
| 32    | H1    | 1.641576E-04  | 4.680346E-05  | 1.000537E-04  |
| 33    | H2    | -9.250118E-05 | -1.377518E-04 | 9.033128E-05  |
| 34    | H3    | -1.964247E-04 | 2.572398E-04  | 1.096879E-04  |
| 35    | H4    | -6.153486E-05 | 3.005876E-04  | 1.449111E-04  |
| total |       | -3.528606E-04 | 1.108235E-03  | 1.985614E-03  |

end of program derlb

start of program geopt 17

geometry optimization step 17  
reading input hessian of dimension 105

in five columns format  
 reading input hessian of dimension 105  
 in five columns format

Level shifts adjusted to satisfy step-size constraints

Step size: 0.0751531

Cos(theta): 0.1398944

Final level shift: -9.9750025E-04

energy change: 6.9958E-05 . ( 5.0000E-05 )  
 gradient maximum: 1.1687E-03 . ( 4.5000E-04 )  
 gradient rms: 1.9272E-04 \* ( 3.0000E-04 )  
 step size: 0.07515 trust radius: 0.07500  
 displacement maximum: 2.8963E-02 . ( 1.8000E-03 )  
 displacement rms: 6.7219E-03 . ( 1.2000E-03 )  
 predicted energy change: -1.4143E-05 geom step: 7.5153E-02 full step:  
 7.5153E-02  
 molecular structure not yet converged...

center of mass moved by:

x: 6.5403E-03 y: -5.5485E-03 z: -1.3898E-03

new geometry:

|      | angstroms     |               |               |
|------|---------------|---------------|---------------|
| atom | x             | y             | z             |
| H25  | 0.9523043544  | 2.0228844652  | -4.1578761179 |
| C1   | 1.4882412669  | 2.0651082600  | -3.2308003563 |
| C2   | 2.9171873624  | 2.1964471422  | -0.7955204938 |
| C3   | 1.2113743989  | 1.1636526768  | -2.2108299389 |
| C4   | 2.4692560474  | 3.0161864616  | -3.0274055224 |
| C5   | 3.1761045804  | 3.0809891666  | -1.8229365206 |
| C6   | 1.9338937434  | 1.2505648816  | -1.0115573822 |
| C7   | 0.2687725184  | 0.0487746506  | -2.0763253576 |
| H27  | 2.6955995100  | 3.7184775796  | -3.8047714502 |
| H28  | 3.9323554031  | 3.8294981639  | -1.6965985259 |
| H30  | 3.4412635550  | 2.2216222956  | 0.1365995127  |
| C8   | 0.4577771765  | -0.4715581071 | -0.8565310416 |
| H32  | -0.4374290286 | -0.2676874363 | -2.8085482367 |
| C10  | -0.0822124159 | -1.5426073678 | 0.0627312163  |
| N2   | 1.4623187192  | 0.2370446324  | -0.1946817732 |
| C9   | 1.7789750641  | -0.2387776618 | 1.0575874800  |
| O1   | 2.5579191190  | 0.2664833247  | 1.8298383584  |
| H43  | -0.0689153689 | -2.5045272812 | -0.4314433251 |
| C12  | -1.5027841764 | -1.2409589637 | 0.5135244266  |
| C11  | 0.9777674755  | -1.5352407914 | 1.2322599107  |
| C19  | 0.4551635531  | -1.6806102949 | 2.6615929317  |
| C13  | -3.7263843810 | -2.0156193855 | 1.0277806658  |
| C14  | -3.1774463774 | 0.2970466493  | 1.2998435515  |
| C15  | -4.1013044448 | -0.7343880633 | 1.3836439773  |
| C16  | -1.8901359996 | 0.0464515357  | 0.8646329904  |
| C17  | -2.4326361583 | -2.2654154957 | 0.5963478763  |
| H49  | -4.4339265189 | -2.8190866444 | 1.0810592084  |
| H50  | -3.4620841359 | 1.2953736400  | 1.5673938833  |
| H51  | -5.1000801483 | -0.5365813545 | 1.7173350416  |
| H52  | -1.1894722085 | 0.8537524980  | 0.7841806965  |
| H53  | -2.1517059326 | -3.2634470667 | 0.3192560660  |
| H1   | 1.2910925935  | -1.6164362241 | 3.3456089994  |
| H2   | -0.0341695894 | -2.6355055403 | 2.7952512699  |
| H3   | -0.2502945170 | -0.9001490950 | 2.9010905744  |
| H4   | 1.6846639744  | -2.3358167404 | 1.0363003378  |

```

nuclear repulsion energy..... 1457.320589003 hartrees
-----
/  end of geometry optimization iteration 17  /
-----

end of program geopt

start of program onee
smallest eigenvalue of S:    1.216E-03
number of canonical orbitals.....      210
end of program onee

start of program probe
end of program probe

start of program grid

number of gridpoints:
  atom      H25      C1      C2      C3      C4      C5      C6      C7
grid # 1      73      89      87      90      87      87      85      85
grid # 2     106     100      97      98      98      98      90      92
grid # 3     224     183     182     194     182     182     187     182
grid # 4     224     379     381     406     379     379     372     376

number of gridpoints:
  atom      H27      H28      H30      C8      H32      C10      N2      C9
grid # 1      73      73      73      86      73      81      99      76
grid # 2     106     106     105      92     106      93     109      81
grid # 3     224     224     220     188     223     175     223     163
grid # 4     224     224     219     375     229     350     400     329

number of gridpoints:
  atom      O1      H43      C12      C11      C19      C13      C14      C15
grid # 1     111      69      91      80      71      87      86      89
grid # 2     123      98     106      90      78     100      99     100
grid # 3     272     210     192     175     150     182     182     182
grid # 4     476     205     397     361     305     378     379     378

number of gridpoints:
  atom      C16      C17      H49      H50      H51      H52      H53      H1
grid # 1      86      85      73      73      73      71      72      71
grid # 2      98      98     106     106     106     100     103      99
grid # 3     181     182     224     223     224     216     216     220
grid # 4     376     377     224     223     224     211     215     220

number of gridpoints:
  atom      H2      H3      H4  total
grid # 1      72      71      69   2817
grid # 2      99      97     100   3483
grid # 3     219     215     218   7039
grid # 4     220     212     210  10837

end of program grid

start of program rwr
recomputing Rwr matrix 15      grid: 4
end of program rwr

```

start of program scf

|      | i | u | d | i | g |                  |          | RMS     | maximum |
|------|---|---|---|---|---|------------------|----------|---------|---------|
|      | t | p | i | c | r |                  |          |         |         |
|      | e | d | i | u | i |                  | energy   | density | DIIS    |
|      | r | t | s | t | d | total energy     | change   | change  | error   |
| etot | 1 | N | N | 1 | U | -815.13865806584 |          | 2.6E-04 | 6.4E-03 |
| etot | 2 | Y | Y | 4 | M | -815.14059660199 | 1.9E-03  | 8.6E-05 | 2.6E-03 |
| etot | 3 | Y | Y | 4 | M | -815.14081510825 | 2.2E-04  | 2.8E-05 | 7.7E-04 |
| etot | 4 | N | Y | 1 | U | -815.14081752837 | 2.4E-06  | 8.8E-06 | 2.0E-04 |
| etot | 5 | Y | Y | 4 | M | -815.14082012224 | 2.6E-06  | 5.8E-06 | 7.6E-05 |
| etot | 6 | Y | Y | 4 | M | -815.14081890741 | -1.2E-06 | 1.4E-06 | 1.8E-05 |
| etot | 7 | Y | N | 4 | M | -815.14081864226 | -2.7E-07 | 0.0E+00 | 0.0E+00 |

Energy components, in hartrees:

|     |                               |                   |       |
|-----|-------------------------------|-------------------|-------|
| (A) | Nuclear repulsion.....        | 1457.32058900316  |       |
| (E) | Total one-electron terms..... | -4000.20645587416 |       |
| (I) | Total two-electron terms..... | 1727.74504822875  |       |
| (L) | Electronic energy.....        | -2272.46140764542 | (E+I) |
| (N) | Total energy.....             | -815.14081864226  | (A+L) |

SCFE: SCF energy: HF      -815.14081864226 hartrees      iterations:      7

HOMO energy:      -0.29712

LUMO energy:      0.11806

Orbital energies:

|           |           |           |           |           |           |
|-----------|-----------|-----------|-----------|-----------|-----------|
| -20.45371 | -15.55210 | -11.32146 | -11.23558 | -11.22333 | -11.21487 |
| -11.20760 | -11.19972 | -11.18793 | -11.18565 | -11.18509 | -11.18446 |
| -11.18298 | -11.18258 | -11.17936 | -11.17737 | -11.17723 | -11.17591 |
| -11.17264 | -11.16418 | -1.42414  | -1.33316  | -1.18043  | -1.16236  |
| -1.11400  | -1.08796  | -1.03832  | -1.02714  | -1.01993  | -1.00138  |
| -0.94893  | -0.90487  | -0.85243  | -0.84374  | -0.83058  | -0.81091  |
| -0.79141  | -0.76054  | -0.72203  | -0.68667  | -0.68149  | -0.66791  |
| -0.65693  | -0.64321  | -0.63985  | -0.62509  | -0.61383  | -0.60778  |
| -0.60453  | -0.60071  | -0.59242  | -0.58301  | -0.55180  | -0.55049  |
| -0.53307  | -0.52479  | -0.51659  | -0.51330  | -0.49865  | -0.49479  |
| -0.48922  | -0.48516  | -0.45853  | -0.42185  | -0.39435  | -0.34891  |
| -0.34253  | -0.31559  | -0.29712  | 0.11806   | 0.13236   | 0.14130   |
| 0.14347   | 0.20540   | 0.22151   | 0.26530   | 0.27158   | 0.28109   |
| 0.30593   |           |           |           |           |           |

end of program scf

start of program derla

end of program derla

start of program rwr

recomputing RwR matrix 15      grid: 4

end of program rwr

start of program derlb

forces (hartrees/bohr) : total

| atom  | label | x             | y             | z             |
|-------|-------|---------------|---------------|---------------|
| 1     | H25   | -9.714509E-05 | -3.257278E-05 | -1.121528E-04 |
| 2     | C1    | -5.265814E-05 | -2.693681E-05 | 1.131277E-04  |
| 3     | C2    | -1.952882E-04 | -1.443699E-04 | -1.273786E-04 |
| 4     | C3    | -1.316005E-04 | -1.217149E-04 | 2.407945E-05  |
| 5     | C4    | -2.992417E-04 | -2.174768E-04 | 5.100155E-06  |
| 6     | C5    | 2.184925E-04  | -5.758959E-05 | 3.679022E-04  |
| 7     | C6    | 1.913134E-04  | 7.440717E-05  | 2.585191E-04  |
| 8     | C7    | 3.738927E-04  | 2.401980E-04  | 1.769582E-04  |
| 9     | H27   | -3.651172E-05 | -3.443829E-05 | 5.519440E-05  |
| 10    | H28   | -5.209564E-05 | 8.625356E-05  | 3.790467E-05  |
| 11    | H30   | -7.893815E-05 | 6.391138E-05  | 1.915184E-04  |
| 12    | C8    | -9.496197E-05 | -1.952724E-04 | 2.783432E-04  |
| 13    | H32   | -1.638826E-04 | -6.141544E-07 | -1.086887E-04 |
| 14    | C10   | 5.812520E-04  | 2.101190E-04  | -5.842982E-04 |
| 15    | N2    | 6.798214E-05  | 2.388671E-04  | 2.010705E-04  |
| 16    | C9    | -9.466315E-04 | 4.679452E-06  | -7.650692E-04 |
| 17    | O1    | 8.266055E-04  | 7.731313E-04  | 4.903099E-04  |
| 18    | H43   | -1.184080E-04 | 2.799531E-05  | 2.039415E-04  |
| 19    | C12   | -7.060573E-06 | -5.426534E-04 | 3.914983E-04  |
| 20    | C11   | -5.394716E-04 | 2.453575E-04  | -4.424123E-04 |
| 21    | C19   | 6.348664E-04  | -1.302009E-05 | 4.374722E-04  |
| 22    | C13   | 1.414945E-04  | -5.315286E-04 | -3.384947E-05 |
| 23    | C14   | -3.197303E-04 | 1.713609E-04  | 8.139079E-05  |
| 24    | C15   | 1.692794E-04  | 7.068616E-04  | 1.260571E-04  |
| 25    | C16   | -3.596334E-05 | 6.468250E-04  | -1.687591E-04 |
| 26    | C17   | 3.884811E-04  | -1.305372E-04 | -5.514099E-05 |
| 27    | H49   | 5.970259E-06  | 2.710949E-05  | 5.098301E-05  |
| 28    | H50   | -3.394615E-05 | -1.874641E-04 | -2.031334E-05 |
| 29    | H51   | -1.106429E-04 | 4.755142E-05  | 1.155310E-05  |
| 30    | H52   | 3.537694E-06  | -2.338354E-04 | 8.117635E-05  |
| 31    | H53   | 6.897872E-05  | 5.498239E-05  | 5.403514E-05  |
| 32    | H1    | 2.216998E-04  | 3.777372E-04  | 5.846765E-04  |
| 33    | H2    | -5.599748E-04 | -8.675184E-04 | 9.457231E-05  |
| 34    | H3    | -4.848391E-04 | 6.374137E-04  | 1.803960E-04  |
| 35    | H4    | 1.634506E-04  | -1.760632E-04 | -2.178885E-04 |
| total |       | -3.016952E-04 | 1.121156E-03  | 1.861829E-03  |

end of program derlb

start of program geopt 18

geometry optimization step 18

reading input hessian of dimension 105  
in five columns format

reading input hessian of dimension 105  
in five columns format

reading input hessian of dimension 105  
in five columns format

\*\* restarting optimization from step 17 \*\*

energy change: 1.5759E-05 \* ( 5.0000E-05 )

gradient maximum: 1.1687E-03 . ( 4.5000E-04 )

gradient rms: 1.9272E-04 \* ( 3.0000E-04 )

step size: 0.02271 trust radius: 0.03750

displacement maximum: 8.7344E-03 . ( 1.8000E-03 )

displacement rms: 2.0313E-03 . ( 1.2000E-03 )



predicted energy change: -6.8780E-06    geom step: 2.2710E-02    full step:  
 2.2710E-02  
 molecular structure not yet converged...

center of mass moved by:  
 x: 1.1102E-16    y: -3.6082E-16    z: -1.9429E-16

new geometry:

|      | angstroms     |               |               |
|------|---------------|---------------|---------------|
| atom | x             | y             | z             |
| H25  | 0.9691123401  | 2.0026052249  | -4.1682374285 |
| C1   | 1.4959039365  | 2.0520277423  | -3.2360989400 |
| C2   | 2.9008081761  | 2.2038027082  | -0.7874684015 |
| C3   | 1.2162795977  | 1.1524833078  | -2.2154569619 |
| C4   | 2.4680917158  | 3.0108306486  | -3.0264011266 |
| C5   | 3.1637220597  | 3.0858023170  | -1.8156263311 |
| C6   | 1.9264330285  | 1.2504843245  | -1.0096435851 |
| C7   | 0.2817883561  | 0.0304766669  | -2.0855509728 |
| H27  | 2.6966918383  | 3.7119562671  | -3.8041645925 |
| H28  | 3.9129563436  | 3.8407758309  | -1.6854507989 |
| H30  | 3.4139669784  | 2.2363381494  | 0.1505218551  |
| C8   | 0.4631899543  | -0.4834104631 | -0.8618808724 |
| H32  | -0.4154905750 | -0.2937410206 | -2.8232490637 |
| C10  | -0.0772984410 | -1.5517571311 | 0.0593485400  |
| N2   | 1.4548027425  | 0.2373941836  | -0.1932554808 |
| C9   | 1.7660730069  | -0.2317557082 | 1.0622776853  |
| O1   | 2.5335999013  | 0.2852691803  | 1.8391901330  |
| H43  | -0.0688662411 | -2.5158397838 | -0.4304096692 |
| C12  | -1.4954578168 | -1.2424988550 | 0.5129606892  |
| C11  | 0.9824188093  | -1.5407415500 | 1.2283701049  |
| C19  | 0.4646744849  | -1.7108803820 | 2.6578471986  |
| C13  | -3.7216987793 | -2.0025538841 | 1.0337037536  |
| C14  | -3.1600576730 | 0.3090200073  | 1.2949625992  |
| C15  | -4.0890157520 | -0.7170141458 | 1.3842969181  |
| C16  | -1.8749294132 | 0.0490639810  | 0.8589459755  |
| C17  | -2.4299685751 | -2.2617535171 | 0.6013162198  |
| H49  | -4.4342283300 | -2.8012858302 | 1.0915651582  |
| H50  | -3.4388838231 | 1.3096730404  | 1.5589866507  |
| H51  | -5.0866240691 | -0.5121877952 | 1.7179744726  |
| H52  | -1.1685220787 | 0.8507890933  | 0.7753405810  |
| H53  | -2.1546207922 | -3.2622027141 | 0.3276576760  |
| H1   | 1.2977642999  | -1.6267729688 | 3.3438826657  |
| H2   | 0.0013374820  | -2.6812715426 | 2.7843894868  |
| H3   | -0.2630988223 | -0.9515104119 | 2.9017504428  |
| H4   | 1.7013290169  | -2.3284347886 | 1.0198974999  |

nuclear repulsion energy..... 1458.041289416 hartrees

-----  
 / end of geometry optimization iteration 18 /  
 -----

end of program geopt

start of program onee  
 smallest eigenvalue of S: 1.216E-03  
 number of canonical orbitals..... 210  
 end of program onee

start of program probe  
 end of program probe

start of program grid

number of gridpoints:

|          |     |     |     |     |     |     |     |     |
|----------|-----|-----|-----|-----|-----|-----|-----|-----|
| atom     | H25 | C1  | C2  | C3  | C4  | C5  | C6  | C7  |
| grid # 1 | 73  | 89  | 87  | 90  | 87  | 87  | 84  | 85  |
| grid # 2 | 106 | 100 | 97  | 98  | 98  | 98  | 90  | 92  |
| grid # 3 | 224 | 183 | 182 | 194 | 182 | 182 | 187 | 182 |
| grid # 4 | 224 | 379 | 381 | 404 | 379 | 379 | 373 | 377 |

number of gridpoints:

|          |     |     |     |     |     |     |     |     |
|----------|-----|-----|-----|-----|-----|-----|-----|-----|
| atom     | H27 | H28 | H30 | C8  | H32 | C10 | N2  | C9  |
| grid # 1 | 73  | 73  | 73  | 86  | 73  | 81  | 99  | 76  |
| grid # 2 | 106 | 106 | 105 | 92  | 106 | 93  | 109 | 81  |
| grid # 3 | 224 | 224 | 220 | 188 | 223 | 175 | 223 | 163 |
| grid # 4 | 224 | 224 | 219 | 377 | 229 | 351 | 401 | 330 |

number of gridpoints:

|          |     |     |     |     |     |     |     |     |
|----------|-----|-----|-----|-----|-----|-----|-----|-----|
| atom     | O1  | H43 | C12 | C11 | C19 | C13 | C14 | C15 |
| grid # 1 | 111 | 69  | 90  | 80  | 71  | 87  | 86  | 89  |
| grid # 2 | 123 | 98  | 106 | 91  | 75  | 100 | 99  | 100 |
| grid # 3 | 272 | 211 | 192 | 175 | 148 | 182 | 182 | 182 |
| grid # 4 | 475 | 205 | 397 | 361 | 306 | 378 | 379 | 378 |

number of gridpoints:

|          |     |     |     |     |     |     |     |     |
|----------|-----|-----|-----|-----|-----|-----|-----|-----|
| atom     | C16 | C17 | H49 | H50 | H51 | H52 | H53 | H1  |
| grid # 1 | 86  | 85  | 73  | 73  | 73  | 71  | 72  | 71  |
| grid # 2 | 97  | 99  | 106 | 106 | 106 | 100 | 103 | 99  |
| grid # 3 | 181 | 182 | 224 | 223 | 224 | 216 | 216 | 220 |
| grid # 4 | 376 | 377 | 224 | 223 | 224 | 211 | 215 | 221 |

number of gridpoints:

|          |     |     |     |       |
|----------|-----|-----|-----|-------|
| atom     | H2  | H3  | H4  | total |
| grid # 1 | 72  | 71  | 69  | 2815  |
| grid # 2 | 99  | 97  | 100 | 3481  |
| grid # 3 | 219 | 214 | 218 | 7037  |
| grid # 4 | 220 | 212 | 211 | 10844 |

end of program grid

start of program rwr

|                        |    |       |   |
|------------------------|----|-------|---|
| recomputing RwR matrix | 4  | grid: | 4 |
| recomputing RwR matrix | 8  | grid: | 4 |
| recomputing RwR matrix | 15 | grid: | 4 |

end of program rwr

start of program scf

|      | i | u | d | i | g |                  |          | RMS     | maximum |
|------|---|---|---|---|---|------------------|----------|---------|---------|
|      | t | p | i | c | r |                  |          | density | DIIS    |
|      | e | d | i | u | i |                  | energy   | change  | error   |
|      | r | t | s | t | d | total energy     | change   |         |         |
| etot | 1 | N | N | 1 | U | -815.13977302674 |          | 1.7E-04 | 4.2E-03 |
| etot | 2 | Y | Y | 4 | M | -815.14074943281 | 9.8E-04  | 6.0E-05 | 1.7E-03 |
| etot | 3 | Y | Y | 4 | M | -815.14085562208 | 1.1E-04  | 2.0E-05 | 5.1E-04 |
| etot | 4 | Y | Y | 4 | M | -815.14086453518 | 8.9E-06  | 6.1E-06 | 1.4E-04 |
| etot | 5 | Y | Y | 4 | M | -815.14086402956 | -5.1E-07 | 2.8E-06 | 5.7E-05 |
| etot | 6 | N | N | 1 | U | -815.14086918459 | 5.2E-06  | 0.0E+00 | 0.0E+00 |

Energy components, in hartrees:

(A) Nuclear repulsion..... 1458.04128941568  
(E) Total one-electron terms..... -4001.64966974635  
(I) Total two-electron terms..... 1728.46751114608  
(L) Electronic energy..... -2273.18215860027 (E+I)  
(N) Total energy..... -815.14086918459 (A+L)

SCFE: SCF energy: HF -815.14086918459 hartrees iterations: 6

HOMO energy: -0.29724

LUMO energy: 0.11777

Orbital energies:

|           |           |           |           |           |           |
|-----------|-----------|-----------|-----------|-----------|-----------|
| -20.45378 | -15.55207 | -11.32152 | -11.23561 | -11.22326 | -11.21490 |
| -11.20788 | -11.19960 | -11.18792 | -11.18560 | -11.18509 | -11.18435 |
| -11.18293 | -11.18246 | -11.17942 | -11.17743 | -11.17728 | -11.17596 |
| -11.17266 | -11.16451 | -1.42384  | -1.33333  | -1.18047  | -1.16239  |
| -1.11397  | -1.08812  | -1.03817  | -1.02707  | -1.01977  | -1.00144  |
| -0.94885  | -0.90500  | -0.85232  | -0.84384  | -0.83049  | -0.81100  |
| -0.79140  | -0.76046  | -0.72215  | -0.68653  | -0.68143  | -0.66777  |
| -0.65702  | -0.64298  | -0.64006  | -0.62498  | -0.61382  | -0.60773  |
| -0.60459  | -0.60066  | -0.59243  | -0.58277  | -0.55153  | -0.55050  |
| -0.53303  | -0.52491  | -0.51633  | -0.51338  | -0.49865  | -0.49485  |
| -0.48923  | -0.48503  | -0.45839  | -0.42185  | -0.39452  | -0.34889  |
| -0.34239  | -0.31553  | -0.29724  | 0.11777   | 0.13217   | 0.14154   |
| 0.14376   | 0.20521   | 0.22183   | 0.26534   | 0.27160   | 0.28100   |
| 0.30576   |           |           |           |           |           |

end of program scf

start of program derla

end of program derla

start of program rwr

recomputing Rwr matrix 4 grid: 4

recomputing Rwr matrix 8 grid: 4

recomputing Rwr matrix 15 grid: 4

end of program rwr

start of program derlb

forces (hartrees/bohr) : total

| atom | label | x             | y             | z             |
|------|-------|---------------|---------------|---------------|
| 1    | H25   | -4.693834E-06 | -8.536052E-06 | -9.477689E-06 |
| 2    | C1    | 5.312281E-05  | 2.333710E-04  | -2.483551E-04 |
| 3    | C2    | -1.833768E-04 | -6.200875E-05 | 1.213958E-04  |
| 4    | C3    | 2.360595E-05  | 1.543685E-04  | -1.769862E-04 |
| 5    | C4    | -1.190726E-04 | -3.329791E-05 | -1.044302E-04 |
| 6    | C5    | 1.324267E-04  | 2.879325E-04  | -3.543594E-05 |
| 7    | C6    | 1.939427E-04  | 9.500827E-05  | 4.294962E-04  |
| 8    | C7    | -5.427043E-04 | -1.815920E-04 | -7.488224E-04 |
| 9    | H27   | -3.809239E-05 | -2.832740E-05 | 4.267616E-05  |
| 10   | H28   | -8.183383E-05 | 9.564089E-06  | 3.065118E-05  |
| 11   | H30   | -8.362424E-06 | 5.785376E-05  | 1.054813E-04  |

|       |       |               |               |               |
|-------|-------|---------------|---------------|---------------|
| 12    | C8    | 9.885833E-05  | -3.409003E-05 | 3.741176E-04  |
| 13    | H32   | -2.808300E-05 | -4.455581E-05 | -3.076627E-06 |
| 14    | C10   | 1.443162E-04  | 3.807262E-05  | -2.955898E-05 |
| 15    | N2    | -5.342666E-05 | 2.652246E-06  | 8.271801E-05  |
| 16    | C9    | -6.922791E-05 | 8.144113E-05  | 9.138950E-05  |
| 17    | O1    | 1.041462E-04  | 1.331836E-04  | 2.390290E-04  |
| 18    | H43   | 6.315669E-05  | 6.748431E-05  | 1.211675E-04  |
| 19    | C12   | -9.873606E-06 | 4.843629E-06  | 6.704167E-05  |
| 20    | C11   | -4.701879E-05 | 3.425245E-05  | 5.484379E-05  |
| 21    | C19   | 7.101177E-05  | -9.360090E-05 | 6.413146E-05  |
| 22    | C13   | 1.140034E-06  | -8.721278E-05 | 4.191634E-05  |
| 23    | C14   | -6.656143E-05 | 4.531795E-07  | 1.070701E-05  |
| 24    | C15   | -7.789365E-05 | 9.935069E-05  | 3.943782E-05  |
| 25    | C16   | 7.039105E-05  | 1.858857E-04  | 5.823771E-05  |
| 26    | C17   | 1.499683E-05  | 5.168636E-05  | 4.994690E-05  |
| 27    | H49   | 4.346869E-05  | 6.611577E-06  | 4.935697E-05  |
| 28    | H50   | -5.249022E-05 | -2.031589E-05 | -5.083300E-06 |
| 29    | H51   | 4.523268E-05  | -2.634252E-05 | -1.244838E-05 |
| 30    | H52   | -1.127282E-04 | -5.029799E-05 | 2.311132E-05  |
| 31    | H53   | 3.027417E-05  | 1.288317E-06  | 7.768338E-05  |
| 32    | H1    | 7.148042E-05  | 1.292712E-04  | 1.911439E-04  |
| 33    | H2    | -1.856161E-05 | 3.442169E-05  | 7.260594E-05  |
| 34    | H3    | -1.450266E-04 | 2.548167E-04  | 6.706089E-05  |
| 35    | H4    | -4.577715E-05 | 1.177452E-04  | 1.090271E-04  |
| ----- |       |               |               |               |
|       | total | -5.432339E-04 | 1.411381E-03  | 1.240700E-03  |

end of program derlb

start of program geopt 19

geometry optimization step 19

reading input hessian of dimension 105  
in five columns format

reading input hessian of dimension 105  
in five columns format

reading input hessian of dimension 105  
in five columns format

energy change: -3.4784E-05 \* ( 5.0000E-05 )

gradient maximum: 7.9740E-04 . ( 4.5000E-04 )

gradient rms: 1.4807E-04 \* ( 3.0000E-04 )

step size: 0.02057 trust radius: 0.03750

displacement maximum: 8.1281E-03 . ( 1.8000E-03 )

displacement rms: 1.8398E-03 . ( 1.2000E-03 )

predicted energy change: -5.0538E-06 geom step: 2.0569E-02 full step:  
2.0569E-02

molecular structure not yet converged...

center of mass moved by:

x: -2.1783E-03 y: 1.9267E-03 z: -5.4660E-05

new geometry:

|      | angstroms    |              |               |
|------|--------------|--------------|---------------|
| atom | x            | y            | z             |
| H25  | 0.9818550776 | 1.9972801411 | -4.1755921599 |
| C1   | 1.5035662044 | 2.0487348174 | -3.2405840752 |
| C2   | 2.8954433299 | 2.2063464126 | -0.7842616669 |
| C3   | 1.2193303606 | 1.1504055055 | -2.2195473053 |
| C4   | 2.4740838515 | 3.0082393961 | -3.0275099185 |

|     |               |               |               |
|-----|---------------|---------------|---------------|
| C5  | 3.1636657740  | 3.0863436732  | -1.8132345501 |
| C6  | 1.9231995801  | 1.2520087950  | -1.0094927038 |
| C7  | 0.2859811523  | 0.0259566200  | -2.0924979019 |
| H27 | 2.7066263905  | 3.7077415529  | -3.8054893319 |
| H28 | 3.9121041894  | 3.8414115578  | -1.6808896174 |
| H30 | 3.4040148155  | 2.2402602466  | 0.1563966254  |
| C8  | 0.4630033868  | -0.4845998200 | -0.8657563713 |
| H32 | -0.4068094184 | -0.3014848451 | -2.8333605909 |
| C10 | -0.0774172777 | -1.5523228495 | 0.0562450893  |
| N2  | 1.4496847525  | 0.2397859861  | -0.1935734784 |
| C9  | 1.7589712801  | -0.2276254023 | 1.0633228445  |
| O1  | 2.5225814148  | 0.2927658607  | 1.8424425761  |
| H43 | -0.0693641985 | -2.5169798697 | -0.4320253828 |
| C12 | -1.4948376199 | -1.2421815161 | 0.5116663259  |
| C11 | 0.9811669604  | -1.5404250426 | 1.2260893492  |
| C19 | 0.4651956910  | -1.7186846674 | 2.6558241784  |
| C13 | -3.7192219353 | -2.0018648841 | 1.0393947534  |
| C14 | -3.1566177948 | 0.3094136028  | 1.2992014420  |
| C15 | -4.0852370599 | -0.7162358910 | 1.3914427975  |
| C16 | -1.8729160009 | 0.0494596538  | 0.8588267705  |
| C17 | -2.4290286435 | -2.2611193444 | 0.6026220874  |
| H49 | -4.4315175099 | -2.8004336815 | 1.0998504652  |
| H50 | -3.4344224628 | 1.3096826723  | 1.5649294039  |
| H51 | -5.0814784885 | -0.5115310569 | 1.7287971910  |
| H52 | -1.1663593547 | 0.8504059457  | 0.7739018933  |
| H53 | -2.1544833771 | -3.2615647434 | 0.3283553469  |
| H1  | 1.2971650295  | -1.6271720341 | 3.3427392660  |
| H2  | 0.0114235914  | -2.6942232448 | 2.7803626009  |
| H3  | -0.2704675963 | -0.9663762880 | 2.9005583831  |
| H4  | 1.7036434509  | -2.3239227438 | 1.0141499674  |

nuclear repulsion energy..... 1458.077810503 hartrees

/ end of geometry optimization iteration 19 /

end of program geopt

start of program onee  
 smallest eigenvalue of S: 1.218E-03  
 number of canonical orbitals..... 210  
 end of program onee

start of program probe  
 end of program probe

start of program grid

number of gridpoints:

|          |     |     |     |     |     |     |     |     |
|----------|-----|-----|-----|-----|-----|-----|-----|-----|
| atom     | H25 | C1  | C2  | C3  | C4  | C5  | C6  | C7  |
| grid # 1 | 73  | 89  | 87  | 90  | 87  | 87  | 84  | 85  |
| grid # 2 | 106 | 99  | 97  | 98  | 98  | 99  | 90  | 92  |
| grid # 3 | 224 | 183 | 182 | 194 | 182 | 182 | 187 | 183 |
| grid # 4 | 224 | 379 | 381 | 404 | 379 | 379 | 374 | 378 |

number of gridpoints:

|          |     |     |     |    |     |     |     |    |
|----------|-----|-----|-----|----|-----|-----|-----|----|
| atom     | H27 | H28 | H30 | C8 | H32 | C10 | N2  | C9 |
| grid # 1 | 73  | 73  | 73  | 86 | 73  | 81  | 99  | 76 |
| grid # 2 | 106 | 106 | 105 | 92 | 106 | 93  | 109 | 81 |

|          |     |     |     |     |     |     |     |     |
|----------|-----|-----|-----|-----|-----|-----|-----|-----|
| grid # 3 | 224 | 224 | 220 | 188 | 223 | 175 | 223 | 163 |
| grid # 4 | 224 | 224 | 219 | 377 | 229 | 351 | 401 | 328 |

```

number of gridpoints:
  atom      O1      H43      C12      C11      C19      C13      C14      C15
grid # 1    111      69      90      80      71      87      86      89
grid # 2    127      98     105      90      75     100      99     100
grid # 3    272     211     192     175     143     182     182     182
grid # 4    475     205     398     361     302     378     378     378

```

```

number of gridpoints:
  atom      C16      C17      H49      H50      H51      H52      H53      H1
grid # 1      86      85       73       73       73       71       72       71
grid # 2      97      99     106     106     106     100     103       99
grid # 3     181     182     224     223     224     216     216     220
grid # 4     376     377     224     223     224     211     215     221

```

```

number of gridpoints:
  atom      H2      H3      H4  total
grid # 1      72      71      69  2815
grid # 2      99      97     100  3483
grid # 3     219     214     219  7034
grid # 4     220     212     211 10840

```

end of program grid

```

start of program rwr
recomputing RwR matrix   8      grid:  4
recomputing RwR matrix  15      grid:  4
end of program rwr

```

start of program scf

|      | i | u | d | i | g |                  |          | RMS     | maximum |
|------|---|---|---|---|---|------------------|----------|---------|---------|
|      | t | p | i | c | r |                  |          | density | DIIS    |
|      | e | d | i | u | i |                  | energy   | change  | error   |
|      | r | t | s | t | d | total energy     | change   |         |         |
| etot | 1 | N | N | 1 | U | -815.14068106164 |          | 7.4E-05 | 1.7E-03 |
| etot | 2 | Y | Y | 4 | M | -815.14082673905 | 1.5E-04  | 2.5E-05 | 6.9E-04 |
| etot | 3 | Y | Y | 4 | M | -815.14084364367 | 1.7E-05  | 8.2E-06 | 2.0E-04 |
| etot | 4 | Y | Y | 4 | M | -815.14084582692 | 2.2E-06  | 2.8E-06 | 6.5E-05 |
| etot | 5 | Y | N | 4 | M | -815.14084528445 | -5.4E-07 | 0.0E+00 | 0.0E+00 |

```

Energy components, in hartrees:
(A) Nuclear repulsion..... 1458.07781050310
(E) Total one-electron terms..... -4001.72287518358
(I) Total two-electron terms..... 1728.50421939603
(L) Electronic energy..... -2273.21865578755 (E+I)
(N) Total energy..... -815.14084528445 (A+L)

```

```

SCFE: SCF energy: HF      -815.14084528445 hartrees  iterations:  5

```

```

HOMO energy:      -0.29718
LUMO energy:       0.11756

```

```

Orbital energies:
-20.45386  -15.55223  -11.32170  -11.23591  -11.22330  -11.21493

```

|           |           |           |           |           |           |
|-----------|-----------|-----------|-----------|-----------|-----------|
| -11.20802 | -11.19952 | -11.18816 | -11.18551 | -11.18503 | -11.18428 |
| -11.18284 | -11.18237 | -11.17945 | -11.17779 | -11.17730 | -11.17602 |
| -11.17266 | -11.16476 | -1.42368  | -1.33331  | -1.18050  | -1.16228  |
| -1.11397  | -1.08792  | -1.03814  | -1.02705  | -1.01972  | -1.00135  |
| -0.94878  | -0.90504  | -0.85219  | -0.84392  | -0.83048  | -0.81108  |
| -0.79139  | -0.76036  | -0.72224  | -0.68647  | -0.68145  | -0.66768  |
| -0.65700  | -0.64293  | -0.64012  | -0.62492  | -0.61381  | -0.60765  |
| -0.60457  | -0.60065  | -0.59240  | -0.58273  | -0.55138  | -0.55037  |
| -0.53302  | -0.52497  | -0.51627  | -0.51337  | -0.49866  | -0.49484  |
| -0.48929  | -0.48501  | -0.45832  | -0.42196  | -0.39445  | -0.34887  |
| -0.34235  | -0.31550  | -0.29718  | 0.11756   | 0.13213   | 0.14165   |
| 0.14386   | 0.20493   | 0.22186   | 0.26539   | 0.27161   | 0.28089   |
| 0.30571   |           |           |           |           |           |

end of program scf

start of program derla  
end of program derla

start of program rwr  
recomputing Rwr matrix 8 grid: 4  
recomputing Rwr matrix 15 grid: 4  
end of program rwr

start of program derlb

forces (hartrees/bohr) : total

| atom | label | x             | y             | z             |
|------|-------|---------------|---------------|---------------|
| 1    | H25   | 2.424568E-05  | -3.115446E-05 | 7.463959E-05  |
| 2    | C1    | -1.555598E-04 | -3.829115E-04 | 3.065764E-04  |
| 3    | C2    | 1.294631E-04  | 1.999968E-04  | -5.868255E-06 |
| 4    | C3    | 1.624728E-04  | 8.827454E-05  | 3.035139E-04  |
| 5    | C4    | 1.652816E-04  | 1.988854E-04  | 9.723509E-05  |
| 6    | C5    | -3.737918E-04 | -3.152560E-04 | 5.301535E-05  |
| 7    | C6    | -3.332694E-04 | 3.176134E-05  | -5.941027E-04 |
| 8    | C7    | 1.859352E-04  | 1.574059E-04  | 4.077391E-04  |
| 9    | H27   | -4.683888E-05 | 1.755935E-05  | -6.516968E-06 |
| 10   | H28   | 8.422774E-06  | 1.454940E-04  | 3.008530E-05  |
| 11   | H30   | -7.952955E-05 | 1.303564E-04  | -2.745551E-05 |
| 12   | C8    | 3.701530E-05  | 5.490657E-05  | -1.536830E-04 |
| 13   | H32   | 1.105457E-04  | 7.260766E-07  | 1.788229E-04  |
| 14   | C10   | -2.146618E-04 | -4.734726E-05 | 2.206708E-04  |
| 15   | N2    | -6.621686E-05 | 1.170240E-04  | -1.106757E-04 |
| 16   | C9    | 2.970400E-04  | 2.100465E-04  | 3.229260E-04  |
| 17   | O1    | -4.180399E-04 | -1.464746E-04 | -1.941379E-04 |
| 18   | H43   | 2.826537E-05  | -1.560312E-06 | 3.341359E-05  |
| 19   | C12   | 1.095271E-04  | 1.680786E-04  | -5.617205E-05 |
| 20   | C11   | 1.843508E-04  | 4.756667E-05  | 2.076465E-04  |
| 21   | C19   | -2.162867E-04 | 2.089874E-04  | -1.151779E-04 |
| 22   | C13   | -2.201426E-05 | 3.751327E-05  | 3.511998E-05  |
| 23   | C14   | 1.338730E-04  | 9.182780E-05  | -3.520179E-05 |
| 24   | C15   | -1.109228E-04 | -2.412548E-04 | 4.269815E-06  |
| 25   | C16   | -3.150924E-05 | -1.047533E-04 | 1.303484E-04  |
| 26   | C17   | -1.469854E-04 | -6.085954E-05 | 1.215089E-04  |
| 27   | H49   | -2.744107E-05 | -7.441840E-05 | 3.749067E-05  |
| 28   | H50   | -6.029451E-05 | 1.530210E-04  | -4.934888E-06 |
| 29   | H51   | -6.258494E-05 | 3.056009E-06  | 1.130083E-05  |

|       |       |               |               |               |
|-------|-------|---------------|---------------|---------------|
| 30    | H52   | 9.100027E-06  | 1.994005E-04  | -1.231526E-05 |
| 31    | H53   | 2.069299E-05  | -4.328999E-05 | 6.340328E-05  |
| 32    | H1    | -4.565300E-05 | 3.175692E-05  | -3.037080E-05 |
| 33    | H2    | 5.821561E-05  | 2.757288E-04  | 7.592706E-05  |
| 34    | H3    | 1.349333E-04  | -9.437877E-05 | 3.255550E-05  |
| 35    | H4    | 4.843881E-05  | 1.113567E-04  | 1.452244E-04  |
| ----- |       |               |               |               |
|       | total | -5.637807E-04 | 1.137072E-03  | 1.546821E-03  |

end of program derlb

start of program geopt 20

geometry optimization step 20

reading input hessian of dimension 105  
in five columns format  
reading input hessian of dimension 105  
in five columns format  
reading input hessian of dimension 105  
in five columns format

energy change: 2.3900E-05 \* ( 5.0000E-05 )  
gradient maximum: 6.4249E-04 . ( 4.5000E-04 )  
gradient rms: 1.4253E-04 \* ( 3.0000E-04 )  
step size: 0.00819 trust radius: 0.01875  
displacement maximum: 4.8630E-03 . ( 1.8000E-03 )  
displacement rms: 7.3297E-04 \* ( 1.2000E-03 )  
predicted energy change: -3.0160E-06 geom step: 8.1948E-03 full step:  
8.1948E-03  
molecular structure not yet converged...

center of mass moved by:

x: 5.4452E-04 y: -5.5842E-04 z: 2.3272E-04

new geometry:

|      | angstroms     |               |               |
|------|---------------|---------------|---------------|
| atom | x             | y             | z             |
| H25  | 0.9780486660  | 1.9961213859  | -4.1739967801 |
| C1   | 1.5008336761  | 2.0480116596  | -3.2396574468 |
| C2   | 2.8954368886  | 2.2065876594  | -0.7851978873 |
| C3   | 1.2183324032  | 1.1498756138  | -2.2183868326 |
| C4   | 2.4708341224  | 3.0084897295  | -3.0277426499 |
| C5   | 3.1614359311  | 3.0869342845  | -1.8142090384 |
| C6   | 1.9235589862  | 1.2514883525  | -1.0096161345 |
| C7   | 0.2852020013  | 0.0257653097  | -2.0902565089 |
| H27  | 2.7017607315  | 3.7082905097  | -3.8059179428 |
| H28  | 3.9092329942  | 3.8429759519  | -1.6823444360 |
| H30  | 3.4049726926  | 2.2413275299  | 0.1548902333  |
| C8   | 0.4638310224  | -0.4853600022 | -0.8643297795 |
| H32  | -0.4086725090 | -0.3014624790 | -2.8299116928 |
| C10  | -0.0765879561 | -1.5529835400 | 0.0578494034  |
| N2   | 1.4512867532  | 0.2389371751  | -0.1931910842 |
| C9   | 1.7610046795  | -0.2284615371 | 1.0636910123  |
| O1   | 2.5247323699  | 0.2914246810  | 1.8425639254  |
| H43  | -0.0685591520 | -2.5176747174 | -0.4305278007 |
| C12  | -1.4941710230 | -1.2422634388 | 0.5125447714  |
| C11  | 0.9826110193  | -1.5408239610 | 1.2271839336  |
| C19  | 0.4660866737  | -1.7173425538 | 2.6565273184  |
| C13  | -3.7207076005 | -2.0003850902 | 1.0347895574  |
| C14  | -3.1559086270 | 0.3101198811  | 1.2990287889  |



|     |               |               |              |
|-----|---------------|---------------|--------------|
| C15 | -4.0860222215 | -0.7148367995 | 1.3878242176 |
| C16 | -1.8715278555 | 0.0493450768  | 0.8611129013 |
| C17 | -2.4298128304 | -2.2604277464 | 0.6003731687 |
| H49 | -4.4340360687 | -2.7983749290 | 1.0924054967 |
| H50 | -3.4332310023 | 1.3105940230  | 1.5651689592 |
| H51 | -5.0828510353 | -0.5093524391 | 1.7231330963 |
| H52 | -1.1643148489 | 0.8501601142  | 0.7781489175 |
| H53 | -2.1559524324 | -3.2608420377 | 0.3250133694 |
| H1  | 1.2987075117  | -1.6308470329 | 3.3429331878 |
| H2  | 0.0075520288  | -2.6903664105 | 2.7806146151 |
| H3  | -0.2654108223 | -0.9618400553 | 2.9023581637 |
| H4  | 1.7047472495  | -2.3249671724 | 1.0161251348 |

nuclear repulsion energy..... 1458.113445894 hartrees

-----  
 / end of geometry optimization iteration 20 /  
 -----

end of program geopt

start of program onee  
 smallest eigenvalue of S: 1.217E-03  
 number of canonical orbitals..... 210  
 end of program onee

start of program probe  
 end of program probe

start of program grid

number of gridpoints:

| atom     | H25 | C1  | C2  | C3  | C4  | C5  | C6  | C7  |
|----------|-----|-----|-----|-----|-----|-----|-----|-----|
| grid # 1 | 73  | 89  | 87  | 90  | 87  | 87  | 84  | 85  |
| grid # 2 | 106 | 100 | 97  | 98  | 98  | 98  | 90  | 92  |
| grid # 3 | 224 | 183 | 182 | 194 | 182 | 182 | 187 | 183 |
| grid # 4 | 224 | 379 | 381 | 404 | 379 | 379 | 373 | 378 |

number of gridpoints:

| atom     | H27 | H28 | H30 | C8  | H32 | C10 | N2  | C9  |
|----------|-----|-----|-----|-----|-----|-----|-----|-----|
| grid # 1 | 73  | 73  | 73  | 86  | 73  | 81  | 99  | 76  |
| grid # 2 | 106 | 106 | 105 | 92  | 106 | 93  | 109 | 81  |
| grid # 3 | 224 | 224 | 220 | 188 | 223 | 175 | 223 | 163 |
| grid # 4 | 224 | 224 | 219 | 377 | 229 | 351 | 401 | 328 |

number of gridpoints:

| atom     | O1  | H43 | C12 | C11 | C19 | C13 | C14 | C15 |
|----------|-----|-----|-----|-----|-----|-----|-----|-----|
| grid # 1 | 111 | 69  | 90  | 80  | 72  | 87  | 86  | 89  |
| grid # 2 | 123 | 98  | 105 | 91  | 74  | 100 | 99  | 100 |
| grid # 3 | 273 | 211 | 192 | 175 | 145 | 182 | 182 | 182 |
| grid # 4 | 475 | 205 | 397 | 361 | 308 | 378 | 379 | 378 |

number of gridpoints:

| atom     | C16 | C17 | H49 | H50 | H51 | H52 | H53 | H1  |
|----------|-----|-----|-----|-----|-----|-----|-----|-----|
| grid # 1 | 86  | 85  | 73  | 73  | 73  | 71  | 72  | 71  |
| grid # 2 | 97  | 99  | 106 | 106 | 106 | 100 | 103 | 99  |
| grid # 3 | 181 | 182 | 224 | 223 | 224 | 216 | 216 | 220 |
| grid # 4 | 376 | 377 | 224 | 223 | 224 | 211 | 215 | 221 |

number of gridpoints:

|          |     |     |     |       |
|----------|-----|-----|-----|-------|
| atom     | H2  | H3  | H4  | total |
| grid # 1 | 72  | 71  | 69  | 2816  |
| grid # 2 | 99  | 97  | 100 | 3479  |
| grid # 3 | 219 | 214 | 219 | 7037  |
| grid # 4 | 220 | 212 | 211 | 10845 |

end of program grid

start of program rwr  
recomputing RwR matrix 15      grid: 4  
end of program rwr

start of program scf

|      | i | u | d | i | g |                  |          | RMS     | maximum |
|------|---|---|---|---|---|------------------|----------|---------|---------|
|      | t | p | i | c | r |                  |          | density | DIIS    |
|      | e | d | i | u | i |                  | energy   | change  | error   |
|      | r | t | s | t | d | total energy     | change   |         |         |
| etot | 1 | N | N | 1 | U | -815.14079876061 |          | 3.3E-05 | 5.6E-04 |
| etot | 2 | Y | Y | 4 | M | -815.14082533615 | 2.7E-05  | 1.1E-05 | 2.0E-04 |
| etot | 3 | Y | Y | 4 | M | -815.14082991026 | 4.6E-06  | 3.3E-06 | 6.3E-05 |
| etot | 4 | Y | N | 4 | M | -815.14082868622 | -1.2E-06 | 0.0E+00 | 0.0E+00 |

Energy components, in hartrees:

|     |                               |                   |       |
|-----|-------------------------------|-------------------|-------|
| (A) | Nuclear repulsion.....        | 1458.11344589424  |       |
| (E) | Total one-electron terms..... | -4001.79392558639 |       |
| (I) | Total two-electron terms..... | 1728.53965100593  |       |
| (L) | Electronic energy.....        | -2273.25427458046 | (E+I) |
| (N) | Total energy.....             | -815.14082868622  | (A+L) |

SCFE: SCF energy: HF      -815.14082868622 hartrees      iterations: 4

HOMO energy:      -0.29720  
LUMO energy:      0.11766

Orbital energies:

|           |           |           |           |           |           |
|-----------|-----------|-----------|-----------|-----------|-----------|
| -20.45379 | -15.55221 | -11.32168 | -11.23582 | -11.22328 | -11.21496 |
| -11.20797 | -11.19962 | -11.18798 | -11.18557 | -11.18507 | -11.18434 |
| -11.18288 | -11.18244 | -11.17943 | -11.17759 | -11.17730 | -11.17598 |
| -11.17268 | -11.16458 | -1.42383  | -1.33334  | -1.18046  | -1.16232  |
| -1.11398  | -1.08797  | -1.03813  | -1.02704  | -1.01975  | -1.00137  |
| -0.94880  | -0.90503  | -0.85223  | -0.84385  | -0.83046  | -0.81103  |
| -0.79138  | -0.76040  | -0.72220  | -0.68649  | -0.68144  | -0.66771  |
| -0.65698  | -0.64295  | -0.64011  | -0.62495  | -0.61380  | -0.60771  |
| -0.60458  | -0.60064  | -0.59240  | -0.58275  | -0.55144  | -0.55045  |
| -0.53306  | -0.52495  | -0.51630  | -0.51338  | -0.49866  | -0.49485  |
| -0.48926  | -0.48503  | -0.45838  | -0.42191  | -0.39445  | -0.34887  |
| -0.34235  | -0.31550  | -0.29720  | 0.11766   | 0.13210   | 0.14164   |
| 0.14383   | 0.20505   | 0.22188   | 0.26536   | 0.27161   | 0.28091   |
| 0.30573   |           |           |           |           |           |

end of program scf

start of program derla  
end of program derla

```

start of program rwr
recomputing RwR matrix 15      grid: 4
end of program rwr

```

```

start of program derlb

```

```

forces (hartrees/bohr) : total

```

| atom  | label | x             | y             | z             |
|-------|-------|---------------|---------------|---------------|
| 1     | H25   | 1.812915E-05  | -2.766039E-05 | 4.707356E-05  |
| 2     | C1    | -7.089778E-06 | -4.019904E-05 | 1.440926E-04  |
| 3     | C2    | -2.028233E-05 | 7.654699E-05  | 5.486318E-05  |
| 4     | C3    | -9.562110E-05 | -1.607636E-04 | 2.144656E-04  |
| 5     | C4    | 4.643877E-06  | 5.431443E-05  | 1.466458E-05  |
| 6     | C5    | -1.363600E-04 | -6.356268E-05 | 2.737090E-05  |
| 7     | C6    | -1.230375E-04 | 5.185798E-05  | -1.439237E-04 |
| 8     | C7    | 6.094317E-04  | 1.554960E-04  | 8.675479E-04  |
| 9     | H27   | -2.745385E-05 | 8.271607E-06  | -3.242029E-06 |
| 10    | H28   | -7.012470E-05 | 5.055046E-05  | 2.228500E-06  |
| 11    | H30   | -8.514611E-05 | 8.517052E-05  | -1.482511E-05 |
| 12    | C8    | -6.515310E-05 | 1.666852E-04  | -2.074684E-04 |
| 13    | H32   | 4.148572E-05  | -1.315540E-05 | 4.361482E-05  |
| 14    | C10   | 1.737517E-05  | 3.339913E-05  | 1.193228E-04  |
| 15    | N2    | -7.626788E-05 | -1.431270E-05 | 5.975845E-06  |
| 16    | C9    | -9.664519E-06 | -1.177071E-05 | 5.064286E-06  |
| 17    | O1    | -5.795894E-05 | 1.134155E-04  | 8.725729E-05  |
| 18    | H43   | 1.094856E-05  | 4.191556E-05  | 8.590097E-05  |
| 19    | C12   | 1.416655E-05  | 7.095468E-05  | 4.725708E-05  |
| 20    | C11   | 8.681527E-05  | 2.265826E-05  | 7.092116E-05  |
| 21    | C19   | -3.444562E-05 | 1.034229E-04  | -2.629556E-05 |
| 22    | C13   | 1.489727E-05  | 2.785608E-05  | 4.505978E-05  |
| 23    | C14   | 9.330672E-06  | 2.787970E-06  | -7.790729E-06 |
| 24    | C15   | -2.640668E-05 | -5.795500E-05 | 1.433778E-05  |
| 25    | C16   | -2.944042E-05 | -4.977597E-05 | 2.773794E-06  |
| 26    | C17   | -2.032582E-05 | 3.694601E-05  | 6.817067E-05  |
| 27    | H49   | 1.634454E-05  | -1.427022E-05 | 6.198647E-05  |
| 28    | H50   | -4.695122E-05 | 1.953656E-05  | -1.195998E-05 |
| 29    | H51   | -2.321015E-05 | -1.212242E-05 | 1.480052E-05  |
| 30    | H52   | -2.386207E-05 | 6.257389E-05  | 4.411822E-06  |
| 31    | H53   | 2.731504E-05  | 1.882658E-05  | 8.348701E-05  |
| 32    | H1    | 5.931836E-05  | 1.039116E-04  | 1.247230E-04  |
| 33    | H2    | -2.688154E-05 | 5.765152E-05  | 7.511585E-05  |
| 34    | H3    | -4.127689E-05 | 9.617275E-05  | 4.711949E-05  |
| 35    | H4    | -3.957826E-05 | 1.299747E-04  | 1.216823E-04  |
| total |       | -1.563366E-04 | 1.125349E-03  | 2.085784E-03  |

```

end of program derlb

```

```

start of program geopt 21

```

```

geometry optimization step 21
reading input hessian of dimension 105
  in five columns format
reading input hessian of dimension 105
  in five columns format

```

```

energy change:          1.6598E-05 * ( 5.0000E-05 )
gradient maximum:       7.9456E-04 . ( 4.5000E-04 )
gradient rms:           1.3298E-04 * ( 3.0000E-04 )
step size: 0.01505 trust radius: 0.01875
displacement maximum:   5.5946E-03 . ( 1.8000E-03 )
displacement rms:       1.3457E-03 . ( 1.2000E-03 )
predicted energy change: -3.6834E-06 geom step: 1.5045E-02 full step:
1.5045E-02
molecular structure not yet converged...

```

```

center of mass moved by:
  x: 1.6490E-03 y: -1.4211E-03 z: 3.7132E-04

```

new geometry:

|      | angstroms     |               |               |
|------|---------------|---------------|---------------|
| atom | x             | y             | z             |
| H25  | 0.9679252140  | 1.9995865025  | -4.1685695377 |
| C1   | 1.4942765518  | 2.0504903076  | -3.2362485236 |
| C2   | 2.8983907431  | 2.2054239111  | -0.7872535192 |
| C3   | 1.2159798640  | 1.1512715132  | -2.2151129252 |
| C4   | 2.4651427962  | 3.0110198391  | -3.0266126689 |
| C5   | 3.1597442600  | 3.0874706532  | -1.8155219675 |
| C6   | 1.9257540708  | 1.2502367326  | -1.0095001459 |
| C7   | 0.2833941252  | 0.0283325203  | -2.0850736485 |
| H27  | 2.6930790201  | 3.7121552437  | -3.8046278870 |
| H28  | 3.9077584865  | 3.8439593980  | -1.6850912561 |
| H30  | 3.4114228299  | 2.2394925776  | 0.1508885164  |
| C8   | 0.4648374494  | -0.4853881381 | -0.8615831873 |
| H32  | -0.4132907043 | -0.2969342577 | -2.8227460590 |
| C10  | -0.0760738086 | -1.5532452003 | 0.0596746863  |
| N2   | 1.4557458587  | 0.2362897095  | -0.1928646593 |
| C9   | 1.7659006672  | -0.2323681061 | 1.0635163228  |
| O1   | 2.5310278902  | 0.2856205735  | 1.8421794536  |
| H43  | -0.0682821675 | -2.5175957578 | -0.4301255372 |
| C12  | -1.4939641773 | -1.2421258641 | 0.5130251511  |
| C11  | 0.9835472390  | -1.5423213040 | 1.2284536950  |
| C19  | 0.4652749284  | -1.7136764323 | 2.6569296068  |
| C13  | -3.7215659559 | -1.9997650225 | 1.0323073128  |
| C14  | -3.1574946064 | 0.3112650565  | 1.2933851244  |
| C15  | -4.0877041931 | -0.7138524773 | 1.3823460222  |
| C16  | -1.8722501509 | 0.0499204747  | 0.8586583833  |
| C17  | -2.4298154666 | -2.2603253997 | 0.6009079149  |
| H49  | -4.4349206374 | -2.7979443154 | 1.0899417612  |
| H50  | -3.4356423453 | 1.3125462746  | 1.5566535494  |
| H51  | -5.0854179979 | -0.5078120278 | 1.7153970222  |
| H52  | -1.1654893432 | 0.8514857610  | 0.7747401729  |
| H53  | -2.1554169838 | -3.2612607540 | 0.3275720461  |
| H1   | 1.2977799451  | -1.6331087809 | 3.3435872640  |
| H2   | -0.0008132081 | -2.6820625162 | 2.7816154724  |
| H3   | -0.2598332994 | -0.9530804288 | 2.9015742349  |
| H4   | 1.7028937814  | -2.3295423747 | 1.0196947165  |

```

nuclear repulsion energy..... 1458.177165184 hartrees

```

```

/ end of geometry optimization iteration 21 /

```

end of program geopt

```

start of program onee
smallest eigenvalue of S: 1.215E-03

```

number of canonical orbitals..... 210  
 end of program onee

start of program probe  
 end of program probe

start of program grid

number of gridpoints:

| atom     | H25 | C1  | C2  | C3  | C4  | C5  | C6  | C7  |
|----------|-----|-----|-----|-----|-----|-----|-----|-----|
| grid # 1 | 73  | 89  | 87  | 90  | 87  | 87  | 84  | 85  |
| grid # 2 | 106 | 100 | 97  | 98  | 98  | 98  | 90  | 92  |
| grid # 3 | 224 | 183 | 182 | 194 | 182 | 182 | 187 | 182 |
| grid # 4 | 224 | 379 | 381 | 404 | 379 | 379 | 372 | 377 |

number of gridpoints:

| atom     | H27 | H28 | H30 | C8  | H32 | C10 | N2  | C9  |
|----------|-----|-----|-----|-----|-----|-----|-----|-----|
| grid # 1 | 73  | 73  | 73  | 86  | 73  | 81  | 99  | 76  |
| grid # 2 | 106 | 106 | 105 | 92  | 106 | 93  | 109 | 81  |
| grid # 3 | 224 | 224 | 220 | 188 | 223 | 175 | 223 | 163 |
| grid # 4 | 224 | 224 | 219 | 376 | 229 | 351 | 401 | 330 |

number of gridpoints:

| atom     | O1  | H43 | C12 | C11 | C19 | C13 | C14 | C15 |
|----------|-----|-----|-----|-----|-----|-----|-----|-----|
| grid # 1 | 111 | 69  | 90  | 80  | 71  | 87  | 86  | 89  |
| grid # 2 | 123 | 98  | 106 | 91  | 75  | 100 | 99  | 100 |
| grid # 3 | 272 | 211 | 192 | 175 | 148 | 182 | 182 | 182 |
| grid # 4 | 475 | 205 | 397 | 361 | 305 | 378 | 379 | 378 |

number of gridpoints:

| atom     | C16 | C17 | H49 | H50 | H51 | H52 | H53 | H1  |
|----------|-----|-----|-----|-----|-----|-----|-----|-----|
| grid # 1 | 86  | 85  | 73  | 73  | 73  | 71  | 72  | 71  |
| grid # 2 | 97  | 99  | 106 | 106 | 106 | 100 | 103 | 99  |
| grid # 3 | 181 | 182 | 224 | 223 | 224 | 216 | 216 | 220 |
| grid # 4 | 376 | 377 | 224 | 223 | 224 | 211 | 215 | 221 |

number of gridpoints:

| atom     | H2  | H3  | H4  | total |
|----------|-----|-----|-----|-------|
| grid # 1 | 72  | 71  | 69  | 2815  |
| grid # 2 | 99  | 97  | 100 | 3481  |
| grid # 3 | 219 | 214 | 218 | 7037  |
| grid # 4 | 220 | 212 | 210 | 10840 |

end of program grid

start of program rwr  
 recomputing RwR matrix 8 grid: 4  
 recomputing RwR matrix 15 grid: 4  
 end of program rwr

start of program scf

|      | i | u | d | i | g |                  |               |                    |                    |
|------|---|---|---|---|---|------------------|---------------|--------------------|--------------------|
|      | t | p | i | c | r |                  |               |                    |                    |
|      | e | d | i | u | i |                  |               |                    |                    |
|      | r | t | s | t | d | total energy     | energy change | RMS density change | maximum DIIS error |
| etot | 1 | N | N | 1 | U | -815.14059337867 |               | 1.2E-04            | 1.1E-03            |

|      |   |   |   |   |   |                  |          |         |         |
|------|---|---|---|---|---|------------------|----------|---------|---------|
| etot | 2 | Y | Y | 4 | M | -815.14067358434 | 8.0E-05  | 2.0E-05 | 4.6E-04 |
| etot | 3 | Y | Y | 4 | M | -815.14068202080 | 8.4E-06  | 6.5E-06 | 1.4E-04 |
| etot | 4 | Y | Y | 4 | M | -815.14068193861 | -8.2E-08 | 2.5E-06 | 5.3E-05 |
| etot | 5 | Y | N | 4 | M | -815.14068209397 | 1.6E-07  | 0.0E+00 | 0.0E+00 |

Energy components, in hartrees:

|     |                               |                   |       |
|-----|-------------------------------|-------------------|-------|
| (A) | Nuclear repulsion.....        | 1458.17716518382  |       |
| (E) | Total one-electron terms..... | -4001.92051216917 |       |
| (I) | Total two-electron terms..... | 1728.60266489138  |       |
| (L) | Electronic energy.....        | -2273.31784727779 | (E+I) |
| (N) | Total energy.....             | -815.14068209397  | (A+L) |

SCFE: SCF energy: HF -815.14068209397 hartrees iterations: 5

HOMO energy: -0.29723  
LUMO energy: 0.11778

Orbital energies:

|           |           |           |           |           |           |
|-----------|-----------|-----------|-----------|-----------|-----------|
| -20.45374 | -15.55207 | -11.32160 | -11.23553 | -11.22329 | -11.21489 |
| -11.20784 | -11.19966 | -11.18787 | -11.18560 | -11.18508 | -11.18436 |
| -11.18291 | -11.18249 | -11.17952 | -11.17733 | -11.17726 | -11.17598 |
| -11.17273 | -11.16424 | -1.42377  | -1.33332  | -1.18049  | -1.16244  |
| -1.11406  | -1.08817  | -1.03817  | -1.02706  | -1.01983  | -1.00146  |
| -0.94890  | -0.90500  | -0.85233  | -0.84378  | -0.83048  | -0.81095  |
| -0.79137  | -0.76053  | -0.72213  | -0.68661  | -0.68143  | -0.66779  |
| -0.65700  | -0.64297  | -0.64003  | -0.62496  | -0.61385  | -0.60781  |
| -0.60456  | -0.60061  | -0.59238  | -0.58276  | -0.55152  | -0.55057  |
| -0.53312  | -0.52493  | -0.51635  | -0.51339  | -0.49864  | -0.49490  |
| -0.48927  | -0.48505  | -0.45843  | -0.42186  | -0.39454  | -0.34888  |
| -0.34238  | -0.31557  | -0.29723  | 0.11778   | 0.13214   | 0.14153   |
| 0.14375   | 0.20523   | 0.22185   | 0.26531   | 0.27148   | 0.28098   |
| 0.30584   |           |           |           |           |           |

end of program scf

start of program derla  
end of program derla

start of program rwr  
recomputing RwR matrix 2 grid: 4  
recomputing RwR matrix 8 grid: 4  
recomputing RwR matrix 15 grid: 4  
end of program rwr

start of program derlb

forces (hartrees/bohr) : total

| atom | label | x             | y             | z             |
|------|-------|---------------|---------------|---------------|
| 1    | H25   | -1.688655E-05 | -3.056567E-05 | 2.385646E-05  |
| 2    | C1    | 2.728351E-05  | 4.646382E-04  | -7.192114E-04 |
| 3    | C2    | -2.862088E-04 | -2.719874E-04 | 3.115467E-04  |
| 4    | C3    | 4.025810E-05  | -1.918451E-04 | 1.167544E-04  |
| 5    | C4    | -1.725060E-04 | 1.172023E-04  | -2.969702E-04 |
| 6    | C5    | 3.337644E-04  | 3.630490E-04  | 2.358131E-05  |
| 7    | C6    | 2.814975E-04  | 1.778009E-04  | 5.464056E-04  |

|       |       |               |               |               |
|-------|-------|---------------|---------------|---------------|
| 8     | C7    | -6.548318E-04 | -1.840545E-04 | -9.188242E-04 |
| 9     | H27   | -4.251039E-05 | -6.149480E-05 | 8.445876E-05  |
| 10    | H28   | -1.935085E-04 | -9.944477E-05 | -3.923875E-06 |
| 11    | H30   | -6.527282E-05 | 3.756360E-05  | 3.436658E-05  |
| 12    | C8    | 1.937927E-04  | -3.853050E-05 | 4.219804E-04  |
| 13    | H32   | -8.605334E-05 | -3.943488E-05 | -6.889428E-05 |
| 14    | C10   | 1.904174E-04  | -5.676588E-05 | -1.926976E-04 |
| 15    | N2    | -3.474712E-05 | 1.073859E-04  | 2.631866E-04  |
| 16    | C9    | -5.181040E-05 | 1.277560E-04  | 2.467982E-05  |
| 17    | O1    | 6.474832E-05  | 1.231457E-04  | 7.541010E-05  |
| 18    | H43   | 1.577187E-05  | 2.128632E-04  | 2.412473E-04  |
| 19    | C12   | -1.161600E-04 | -1.030079E-04 | 1.079076E-04  |
| 20    | C11   | 7.837876E-05  | -2.130151E-05 | -1.350451E-04 |
| 21    | C19   | 3.564182E-04  | 7.389850E-05  | 7.399370E-05  |
| 22    | C13   | -3.355686E-05 | -1.840837E-04 | 6.815161E-05  |
| 23    | C14   | -2.178328E-04 | 6.743230E-05  | 9.229953E-05  |
| 24    | C15   | -1.482935E-04 | 2.667255E-04  | 1.073959E-04  |
| 25    | C16   | 1.102813E-04  | 2.397501E-04  | -7.959590E-05 |
| 26    | C17   | 1.678882E-04  | -5.860225E-05 | 2.172210E-05  |
| 27    | H49   | 9.213284E-05  | 8.155424E-05  | 3.775842E-05  |
| 28    | H50   | -7.519537E-06 | -1.798684E-04 | -2.700181E-05 |
| 29    | H51   | 1.334257E-04  | -3.846099E-05 | -4.969179E-05 |
| 30    | H52   | -1.182300E-04 | -1.847872E-04 | 5.913585E-05  |
| 31    | H53   | 2.220681E-05  | 9.523529E-05  | 9.062399E-05  |
| 32    | H1    | 2.798840E-04  | 1.477425E-04  | 3.147974E-04  |
| 33    | H2    | -2.455495E-04 | -5.281776E-04 | 1.275178E-04  |
| 34    | H3    | -5.414461E-04 | 6.419939E-04  | 2.253192E-04  |
| 35    | H4    | -2.576777E-05 | 1.435856E-04  | 6.100669E-05  |
| ----- |       |               |               |               |
|       | total | -6.705421E-04 | 1.216910E-03  | 1.063248E-03  |

end of program derlb

start of program geopt 22

geometry optimization step 22  
 reading input hessian of dimension 105  
 in five columns format  
 reading input hessian of dimension 105  
 in five columns format  
 \*\* restarting optimization from step 21 \*\*

Level shifts adjusted to satisfy step-size constraints  
 Step size: 0.0102289  
 Cos(theta): 0.5598262

Final level shift: -5.9526998E-03

energy change: 1.4659E-04 . ( 5.0000E-05 )  
 gradient maximum: 7.9456E-04 . ( 4.5000E-04 )  
 gradient rms: 1.3298E-04 \* ( 3.0000E-04 )  
 step size: 0.01023 trust radius: 0.01000  
 displacement maximum: 3.3561E-03 . ( 1.8000E-03 )  
 displacement rms: 9.1490E-04 \* ( 1.2000E-03 )  
 predicted energy change: -4.5683E-06 geom step: 1.0229E-02 full step:  
 1.0229E-02  
 molecular structure not yet converged...

center of mass moved by:  
 x: 8.3267E-16 y: -4.4409E-16 z: 5.5511E-16

new geometry:

|      | angstroms     |               |               |
|------|---------------|---------------|---------------|
| atom | x             | y             | z             |
| H25  | 0.9709847000  | 1.9943485287  | -4.1702911763 |
| C1   | 1.4955429179  | 2.0474583568  | -3.2372709516 |
| C2   | 2.8944584332  | 2.2070271846  | -0.7851336403 |
| C3   | 1.2172159044  | 1.1487689012  | -2.2151846540 |
| C4   | 2.4643492880  | 3.0097885580  | -3.0269421330 |
| C5   | 3.1565045258  | 3.0880810218  | -1.8143274237 |
| C6   | 1.9241597738  | 1.2503147321  | -1.0082075334 |
| C7   | 0.2864921918  | 0.0244288368  | -2.0858247638 |
| H27  | 2.6927521707  | 3.7103915109  | -3.8051190979 |
| H28  | 3.9028733044  | 3.8456762382  | -1.6833679431 |
| H30  | 3.4054655484  | 2.2430341092  | 0.1537362611  |
| C8   | 0.4666969459  | -0.4881726006 | -0.8617627226 |
| H32  | -0.4081392094 | -0.3027293423 | -2.8246613907 |
| C10  | -0.0744225441 | -1.5554604158 | 0.0597754981  |
| N2   | 1.4548772379  | 0.2360244433  | -0.1916074142 |
| C9   | 1.7633413886  | -0.2314040062 | 1.0656646899  |
| O1   | 2.5246327483  | 0.2890291917  | 1.8462537553  |
| H43  | -0.0679627438 | -2.5199365567 | -0.4289164235 |
| C12  | -1.4918157714 | -1.2421805538 | 0.5131810205  |
| C11  | 0.9852015538  | -1.5440963638 | 1.2283136609  |
| C19  | 0.4679451148  | -1.7205307979 | 2.6566095103  |
| C13  | -3.7208328491 | -1.9965700163 | 1.0326275100  |
| C14  | -3.1531418624 | 0.3138132765  | 1.2929775902  |
| C15  | -4.0851356711 | -0.7099227360 | 1.3822437210  |
| C16  | -1.8682194981 | 0.0505542932  | 0.8583296956  |
| C17  | -2.4293794803 | -2.2589395621 | 0.6013105733  |
| H49  | -4.4353094756 | -2.7936882130 | 1.0903842101  |
| H50  | -3.4296548934 | 1.3154526647  | 1.5561141644  |
| H51  | -5.0823730018 | -0.5022856234 | 1.7151360487  |
| H52  | -1.1604980431 | 0.8511003070  | 0.7743822621  |
| H53  | -2.1565972746 | -3.2602712989 | 0.3280820399  |
| H1   | 1.3006947122  | -1.6350803828 | 3.3433936446  |
| H2   | 0.0082933769  | -2.6935539593 | 2.7795177551  |
| H3   | -0.2635313006 | -0.9646922263 | 2.9023560384  |
| H4   | 1.7069743397  | -2.3279404523 | 1.0172218649  |

nuclear repulsion energy..... 1458.343626022 hartrees

/ end of geometry optimization iteration 22 /

end of program geopt

start of program onee  
smallest eigenvalue of S: 1.215E-03  
number of canonical orbitals..... 210  
end of program onee

start of program probe  
end of program probe

start of program grid

number of gridpoints:  
atom H25 C1 C2 C3 C4 C5 C6 C7



|          |     |     |     |     |     |     |     |     |
|----------|-----|-----|-----|-----|-----|-----|-----|-----|
| grid # 1 | 73  | 89  | 87  | 90  | 87  | 87  | 84  | 85  |
| grid # 2 | 106 | 100 | 97  | 98  | 98  | 98  | 90  | 92  |
| grid # 3 | 224 | 183 | 182 | 194 | 182 | 182 | 187 | 182 |
| grid # 4 | 224 | 379 | 381 | 406 | 379 | 379 | 372 | 377 |

number of gridpoints:

|          |     |     |     |     |     |     |     |     |
|----------|-----|-----|-----|-----|-----|-----|-----|-----|
| atom     | H27 | H28 | H30 | C8  | H32 | C10 | N2  | C9  |
| grid # 1 | 73  | 73  | 73  | 86  | 73  | 81  | 99  | 76  |
| grid # 2 | 106 | 106 | 105 | 92  | 106 | 93  | 109 | 81  |
| grid # 3 | 224 | 224 | 220 | 187 | 223 | 175 | 223 | 163 |
| grid # 4 | 224 | 224 | 219 | 376 | 229 | 351 | 401 | 329 |

number of gridpoints:

|          |     |     |     |     |     |     |     |     |
|----------|-----|-----|-----|-----|-----|-----|-----|-----|
| atom     | O1  | H43 | C12 | C11 | C19 | C13 | C14 | C15 |
| grid # 1 | 111 | 69  | 90  | 80  | 71  | 87  | 86  | 89  |
| grid # 2 | 123 | 98  | 106 | 91  | 74  | 100 | 99  | 100 |
| grid # 3 | 273 | 211 | 192 | 175 | 147 | 182 | 182 | 182 |
| grid # 4 | 475 | 205 | 397 | 361 | 305 | 378 | 379 | 378 |

number of gridpoints:

|          |     |     |     |     |     |     |     |     |
|----------|-----|-----|-----|-----|-----|-----|-----|-----|
| atom     | C16 | C17 | H49 | H50 | H51 | H52 | H53 | H1  |
| grid # 1 | 86  | 85  | 73  | 73  | 73  | 71  | 72  | 71  |
| grid # 2 | 97  | 99  | 106 | 106 | 106 | 100 | 103 | 99  |
| grid # 3 | 181 | 182 | 224 | 223 | 224 | 216 | 216 | 220 |
| grid # 4 | 376 | 377 | 224 | 223 | 224 | 211 | 215 | 221 |

number of gridpoints:

|          |     |     |     |       |
|----------|-----|-----|-----|-------|
| atom     | H2  | H3  | H4  | total |
| grid # 1 | 72  | 71  | 69  | 2815  |
| grid # 2 | 99  | 97  | 100 | 3480  |
| grid # 3 | 219 | 214 | 219 | 7037  |
| grid # 4 | 220 | 212 | 210 | 10841 |

end of program grid

start of program rwr

|                        |    |       |   |
|------------------------|----|-------|---|
| recomputing RwR matrix | 8  | grid: | 4 |
| recomputing RwR matrix | 15 | grid: | 4 |
| end of program rwr     |    |       |   |

start of program scf

|      |   |   |   |   |   |                  |               |                                |
|------|---|---|---|---|---|------------------|---------------|--------------------------------|
|      | i | u | d | i | g |                  |               |                                |
|      | t | p | i | c | r |                  |               |                                |
|      | e | d | i | u | i |                  |               |                                |
|      | r | t | s | t | d | total energy     | energy change | RMS density maximum DIIS error |
| etot | 1 | N | N | 1 | U | -815.14057271703 |               | 1.4E-04 1.2E-03                |
| etot | 2 | Y | Y | 4 | M | -815.14063223326 | 6.0E-05       | 1.9E-05 3.6E-04                |
| etot | 3 | Y | Y | 4 | M | -815.14063782775 | 5.6E-06       | 4.7E-06 1.2E-04                |
| etot | 4 | Y | N | 4 | M | -815.14063795184 | 1.2E-07       | 0.0E+00 0.0E+00                |

Energy components, in hartrees:

|     |                               |                   |       |
|-----|-------------------------------|-------------------|-------|
| (A) | Nuclear repulsion.....        | 1458.34362602168  |       |
| (E) | Total one-electron terms..... | -4002.25448851981 |       |
| (I) | Total two-electron terms..... | 1728.77022454629  |       |
| (L) | Electronic energy.....        | -2273.48426397352 | (E+I) |
| (N) | Total energy.....             | -815.14063795184  | (A+L) |

SCFE: SCF energy: HF -815.14063795184 hartrees iterations: 4

HOMO energy: -0.29717

LUMO energy: 0.11774

Orbital energies:

|           |           |           |           |           |           |
|-----------|-----------|-----------|-----------|-----------|-----------|
| -20.45387 | -15.55198 | -11.32154 | -11.23542 | -11.22320 | -11.21476 |
| -11.20776 | -11.19961 | -11.18787 | -11.18559 | -11.18508 | -11.18434 |
| -11.18292 | -11.18241 | -11.17959 | -11.17728 | -11.17723 | -11.17604 |
| -11.17282 | -11.16467 | -1.42388  | -1.33333  | -1.18045  | -1.16243  |
| -1.11406  | -1.08817  | -1.03813  | -1.02701  | -1.01986  | -1.00139  |
| -0.94881  | -0.90498  | -0.85225  | -0.84374  | -0.83047  | -0.81096  |
| -0.79137  | -0.76055  | -0.72216  | -0.68665  | -0.68146  | -0.66778  |
| -0.65701  | -0.64293  | -0.64011  | -0.62491  | -0.61394  | -0.60785  |
| -0.60455  | -0.60055  | -0.59237  | -0.58268  | -0.55144  | -0.55055  |
| -0.53298  | -0.52493  | -0.51629  | -0.51344  | -0.49860  | -0.49492  |
| -0.48924  | -0.48503  | -0.45843  | -0.42188  | -0.39456  | -0.34883  |
| -0.34232  | -0.31564  | -0.29717  | 0.11774   | 0.13221   | 0.14158   |
| 0.14375   | 0.20520   | 0.22195   | 0.26540   | 0.27152   | 0.28101   |
| 0.30574   |           |           |           |           |           |

end of program scf

start of program derla

end of program derla

start of program rwr

recomputing Rwr matrix 2 grid: 4

recomputing Rwr matrix 8 grid: 4

recomputing Rwr matrix 15 grid: 4

end of program rwr

start of program derlb

forces (hartrees/bohr) : total

| atom | label | x             | y             | z             |
|------|-------|---------------|---------------|---------------|
| 1    | H25   | -9.297692E-05 | -3.446842E-05 | -5.908082E-05 |
| 2    | C1    | 2.702430E-05  | 2.480234E-04  | -3.416288E-04 |
| 3    | C2    | -9.349053E-05 | 6.856195E-05  | -6.144869E-05 |
| 4    | C3    | -5.693217E-05 | -6.350050E-06 | -1.418257E-04 |
| 5    | C4    | -1.008624E-04 | -6.023304E-05 | 1.764901E-05  |
| 6    | C5    | 1.950921E-04  | 3.533048E-04  | 2.564745E-05  |
| 7    | C6    | 1.586238E-04  | -8.430720E-05 | 4.819420E-04  |
| 8    | C7    | -6.938552E-04 | -3.016917E-04 | -1.058903E-03 |
| 9    | H27   | -1.457972E-05 | 5.759269E-06  | 4.970174E-05  |
| 10   | H28   | -2.211050E-05 | 4.479908E-05  | 3.583940E-05  |
| 11   | H30   | 7.052739E-05  | 7.045849E-05  | 1.916845E-04  |
| 12   | C8    | 2.228411E-04  | -1.357705E-05 | 4.539425E-04  |
| 13   | H32   | -8.288187E-05 | -2.306154E-05 | -2.675018E-05 |
| 14   | C10   | 9.099274E-05  | 1.103408E-04  | -2.336217E-05 |
| 15   | N2    | -1.780922E-04 | 1.153398E-04  | 1.854953E-04  |
| 16   | C9    | -1.231872E-04 | 9.996482E-05  | -2.400056E-05 |
| 17   | O1    | 1.707156E-04  | 1.781259E-04  | 4.294235E-05  |
| 18   | H43   | 6.413036E-05  | -1.474315E-05 | 8.573206E-05  |
| 19   | C12   | -2.363941E-04 | -2.025369E-04 | 9.961007E-05  |
| 20   | C11   | -2.646624E-04 | 3.370099E-04  | -9.236004E-06 |

|       |       |               |               |               |
|-------|-------|---------------|---------------|---------------|
| 21    | C19   | -1.174006E-04 | -1.038197E-04 | 3.895163E-04  |
| 22    | C13   | 2.244443E-05  | -2.232245E-05 | 5.462872E-05  |
| 23    | C14   | -2.957471E-04 | -1.022502E-04 | 1.173352E-04  |
| 24    | C15   | 1.541933E-04  | 2.743651E-04  | 2.365406E-05  |
| 25    | C16   | -1.043650E-04 | 1.415756E-04  | -6.815826E-05 |
| 26    | C17   | 1.931746E-04  | 5.222045E-05  | 1.943141E-05  |
| 27    | H49   | 8.680522E-05  | 6.550208E-05  | 3.904493E-05  |
| 28    | H50   | -4.129499E-05 | -9.465647E-05 | -2.377689E-05 |
| 29    | H51   | 1.520830E-05  | -4.759156E-06 | -9.392908E-06 |
| 30    | H52   | -2.390591E-05 | -1.561630E-04 | 5.482847E-05  |
| 31    | H53   | 5.600193E-05  | 4.654257E-05  | 9.253156E-05  |
| 32    | H1    | -1.738186E-04 | 7.678866E-05  | 9.304826E-05  |
| 33    | H2    | 9.819621E-05  | 2.668080E-04  | 1.455594E-04  |
| 34    | H3    | 1.127351E-04  | 2.336613E-05  | 3.919433E-05  |
| 35    | H4    | 1.378237E-04  | -9.885976E-05 | 2.808879E-05  |
| ----- |       |               |               |               |
|       | total | -8.400274E-04 | 1.255057E-03  | 9.194834E-04  |

end of program derlb

start of program geopt 23

geometry optimization step 23

reading input hessian of dimension 105  
in five columns format

reading input hessian of dimension 105  
in five columns format

reading input hessian of dimension 105  
in five columns format

\*\* restarting optimization from step 21 \*\*

energy change: 1.9073E-04 . ( 5.0000E-05 )

gradient maximum: 7.9456E-04 . ( 4.5000E-04 )

gradient rms: 1.3298E-04 \* ( 3.0000E-04 )

step size: 0.00372 trust radius: 0.01000

displacement maximum: 1.4271E-03 \* ( 1.8000E-03 )

displacement rms: 3.3276E-04 \* ( 1.2000E-03 )

predicted energy change: -1.6098E-06 geom step: 3.7203E-03 full step:  
3.7203E-03

molecular structure not yet converged...

center of mass moved by:

x: 3.8858E-16 y: 2.2204E-16 z: -8.6042E-16

new geometry:

|      | angstroms     |               |               |
|------|---------------|---------------|---------------|
| atom | x             | y             | z             |
| H25  | 0.9754393767  | 1.9958564099  | -4.1725371865 |
| C1   | 1.4990699123  | 2.0481032803  | -3.2387684431 |
| C2   | 2.8955865720  | 2.2066404840  | -0.7852119429 |
| C3   | 1.2179949956  | 1.1497452096  | -2.2171381244 |
| C4   | 2.4689201749  | 3.0090698007  | -3.0274372279 |
| C5   | 3.1602721434  | 3.0871938981  | -1.8142756191 |
| C6   | 1.9239842497  | 1.2511797348  | -1.0090717751 |
| C7   | 0.2854931333  | 0.0257955134  | -2.0884951956 |
| H27  | 2.6990749606  | 3.7091545068  | -3.8055686008 |
| H28  | 3.9078434094  | 3.8435406024  | -1.6827913148 |
| H30  | 3.4058552836  | 2.2416677548  | 0.1543558526  |
| C8   | 0.4646111178  | -0.4858040558 | -0.8632447616 |
| H32  | -0.4088011315 | -0.3012451447 | -2.8278434821 |

|     |               |               |               |
|-----|---------------|---------------|---------------|
| C10 | -0.0760560570 | -1.5534698845 | 0.0585203290  |
| N2  | 1.4525328990  | 0.2381394570  | -0.1925308940 |
| C9  | 1.7624421879  | -0.2298730157 | 1.0640742257  |
| O1  | 2.5261162178  | 0.2895035555  | 1.8431533636  |
| H43 | -0.0684737206 | -2.5179214967 | -0.4302772946 |
| C12 | -1.4936808527 | -1.2422277286 | 0.5127468833  |
| C11 | 0.9834858838  | -1.5419116781 | 1.2274608227  |
| C19 | 0.4666546459  | -1.7178687096 | 2.6565332906  |
| C13 | -3.7206857675 | -1.9996158305 | 1.0345089244  |
| C14 | -3.1557567858 | 0.3110567182  | 1.2965759499  |
| C15 | -4.0860885764 | -0.7137444887 | 1.3859921067  |
| C16 | -1.8711579933 | 0.0497058265  | 0.8596953110  |
| C17 | -2.4295665540 | -2.2601825846 | 0.6011223030  |
| H49 | -4.4341091400 | -2.7975085665 | 1.0924947825  |
| H50 | -3.4331262700 | 1.3119097835  | 1.5613342718  |
| H51 | -5.0830901073 | -0.5077775904 | 1.7204991837  |
| H52 | -1.1639993566 | 0.8506010826  | 0.7760521085  |
| H53 | -2.1557240016 | -3.2608751090 | 0.3268254886  |
| H1  | 1.2995203266  | -1.6329405755 | 3.3429249037  |
| H2  | 0.0065898160  | -2.6902801017 | 2.7802798389  |
| H3  | -0.2638061714 | -0.9613827946 | 2.9025393654  |
| H4  | 1.7050776197  | -2.3263972464 | 1.0164967537  |

nuclear repulsion energy..... 1458.165316215 hartrees

-----  
/ end of geometry optimization iteration 23 /  
-----

end of program geopt

start of program onee  
smallest eigenvalue of S: 1.217E-03  
number of canonical orbitals..... 210  
end of program onee

start of program probe  
end of program probe

start of program grid

number of gridpoints:

|          | atom | H25 | C1  | C2  | C3  | C4  | C5  | C6  | C7  |
|----------|------|-----|-----|-----|-----|-----|-----|-----|-----|
| grid # 1 |      | 73  | 89  | 87  | 90  | 87  | 87  | 84  | 85  |
| grid # 2 |      | 106 | 100 | 97  | 98  | 98  | 98  | 90  | 92  |
| grid # 3 |      | 224 | 183 | 182 | 194 | 182 | 182 | 187 | 182 |
| grid # 4 |      | 224 | 379 | 381 | 406 | 379 | 379 | 373 | 377 |

number of gridpoints:

|          | atom | H27 | H28 | H30 | C8  | H32 | C10 | N2  | C9  |
|----------|------|-----|-----|-----|-----|-----|-----|-----|-----|
| grid # 1 |      | 73  | 73  | 73  | 86  | 73  | 81  | 99  | 76  |
| grid # 2 |      | 106 | 106 | 105 | 92  | 106 | 93  | 109 | 81  |
| grid # 3 |      | 224 | 224 | 220 | 188 | 223 | 175 | 223 | 163 |
| grid # 4 |      | 224 | 224 | 219 | 377 | 229 | 351 | 401 | 330 |

number of gridpoints:

|          | atom | O1  | H43 | C12 | C11 | C19 | C13 | C14 | C15 |
|----------|------|-----|-----|-----|-----|-----|-----|-----|-----|
| grid # 1 |      | 111 | 69  | 90  | 80  | 71  | 87  | 86  | 89  |
| grid # 2 |      | 123 | 98  | 106 | 91  | 75  | 100 | 99  | 100 |
| grid # 3 |      | 273 | 211 | 192 | 175 | 147 | 182 | 182 | 182 |

grid # 4            475        205        397        361        303        378        379        378

number of gridpoints:

|          |     |     |     |     |     |     |     |     |
|----------|-----|-----|-----|-----|-----|-----|-----|-----|
| atom     | C16 | C17 | H49 | H50 | H51 | H52 | H53 | H1  |
| grid # 1 | 86  | 85  | 73  | 73  | 73  | 71  | 72  | 71  |
| grid # 2 | 97  | 99  | 106 | 106 | 106 | 100 | 103 | 99  |
| grid # 3 | 181 | 182 | 224 | 223 | 224 | 216 | 216 | 220 |
| grid # 4 | 376 | 377 | 224 | 223 | 224 | 211 | 215 | 221 |

number of gridpoints:

|          |     |     |     |       |
|----------|-----|-----|-----|-------|
| atom     | H2  | H3  | H4  | total |
| grid # 1 | 72  | 71  | 69  | 2815  |
| grid # 2 | 99  | 97  | 100 | 3481  |
| grid # 3 | 219 | 214 | 219 | 7038  |
| grid # 4 | 220 | 212 | 211 | 10843 |

end of program grid

start of program rwr

recomputing RwR matrix    8        grid: 4

recomputing RwR matrix    15       grid: 4

end of program rwr

start of program scf

|      | i | u | d | i | g |                  |               | RMS     | maximum |
|------|---|---|---|---|---|------------------|---------------|---------|---------|
|      | t | p | i | c | r |                  |               | energy  | density |
|      | e | d | i | u | i |                  |               | change  | DIIS    |
|      | r | t | s | t | d | total energy     | energy change | change  | error   |
| etot | 1 | N | N | 1 | U | -815.14077889952 |               | 1.8E-04 | 1.2E-03 |
| etot | 2 | Y | Y | 4 | M | -815.14081762226 | 3.9E-05       | 1.7E-05 | 1.5E-04 |
| etot | 3 | Y | Y | 4 | M | -815.14081861901 | 1.0E-06       | 3.8E-06 | 5.5E-05 |
| etot | 4 | Y | N | 4 | M | -815.14081809752 | -5.2E-07      | 0.0E+00 | 0.0E+00 |

Energy components, in hartrees:

|     |                               |                   |       |
|-----|-------------------------------|-------------------|-------|
| (A) | Nuclear repulsion.....        | 1458.16531621535  |       |
| (E) | Total one-electron terms..... | -4001.89615490508 |       |
| (I) | Total two-electron terms..... | 1728.59002059222  |       |
| (L) | Electronic energy.....        | -2273.30613431286 | (E+I) |
| (N) | Total energy.....             | -815.14081809752  | (A+L) |

SCFE: SCF energy: HF        -815.14081809752 hartrees    iterations: 4

HOMO energy:        -0.29721

LUMO energy:        0.11768

Orbital energies:

|           |           |           |           |           |           |
|-----------|-----------|-----------|-----------|-----------|-----------|
| -20.45373 | -15.55215 | -11.32166 | -11.23576 | -11.22332 | -11.21494 |
| -11.20796 | -11.19964 | -11.18810 | -11.18554 | -11.18503 | -11.18430 |
| -11.18284 | -11.18247 | -11.17945 | -11.17757 | -11.17732 | -11.17594 |
| -11.17261 | -11.16459 | -1.42387  | -1.33339  | -1.18048  | -1.16236  |
| -1.11400  | -1.08809  | -1.03815  | -1.02703  | -1.01979  | -1.00139  |
| -0.94882  | -0.90504  | -0.85227  | -0.84384  | -0.83047  | -0.81102  |
| -0.79140  | -0.76046  | -0.72219  | -0.68656  | -0.68146  | -0.66777  |
| -0.65699  | -0.64297  | -0.64010  | -0.62493  | -0.61388  | -0.60775  |
| -0.60461  | -0.60061  | -0.59242  | -0.58275  | -0.55146  | -0.55050  |
| -0.53305  | -0.52495  | -0.51631  | -0.51340  | -0.49864  | -0.49488  |

```

-0.48925   -0.48504   -0.45840   -0.42189   -0.39453   -0.34885
-0.34235   -0.31555   -0.29721    0.11768    0.13212    0.14160
 0.14383    0.20512    0.22187    0.26535    0.27159    0.28092
 0.30570

```

end of program scf

start of program derla  
end of program derla

```

start of program rwr
recomputing Rwr matrix   8      grid:   4
recomputing Rwr matrix  15      grid:   4
end of program rwr

```

start of program derlb

forces (hartrees/bohr) : total

| atom  | label | x             | y             | z             |
|-------|-------|---------------|---------------|---------------|
| 1     | H25   | -2.835388E-06 | -2.819158E-06 | -4.902329E-07 |
| 2     | C1    | 1.040395E-04  | -2.433384E-05 | 3.127439E-04  |
| 3     | C2    | -8.033582E-05 | 2.414625E-05  | -1.126008E-05 |
| 4     | C3    | 1.002489E-04  | 1.980184E-04  | -5.688413E-05 |
| 5     | C4    | -1.468930E-04 | -1.386828E-04 | 2.566270E-05  |
| 6     | C5    | -4.060293E-05 | 9.364192E-05  | -1.565305E-06 |
| 7     | C6    | -4.937338E-06 | 3.561842E-05  | 7.198085E-05  |
| 8     | C7    | -2.247212E-04 | -6.073031E-05 | -3.117498E-04 |
| 9     | H27   | -3.133986E-05 | 3.575414E-05  | -8.099211E-06 |
| 10    | H28   | -6.468266E-05 | 7.010483E-05  | 7.867262E-06  |
| 11    | H30   | -3.370461E-05 | 7.805225E-05  | 5.496078E-05  |
| 12    | C8    | 6.764739E-05  | -3.143127E-05 | 1.825368E-04  |
| 13    | H32   | 8.253951E-06  | -1.502475E-05 | 3.535706E-05  |
| 14    | C10   | 4.005453E-05  | 2.962190E-05  | 4.063639E-05  |
| 15    | N2    | -4.648961E-05 | 6.425144E-05  | 7.010081E-06  |
| 16    | C9    | -9.139593E-05 | -7.904895E-06 | -3.165349E-05 |
| 17    | O1    | 7.451213E-05  | 2.168090E-04  | 1.990827E-04  |
| 18    | H43   | 2.721443E-05  | 7.701451E-06  | 8.568685E-05  |
| 19    | C12   | -3.522405E-05 | 1.028688E-05  | 1.048420E-04  |
| 20    | C11   | -8.690775E-05 | 8.500984E-05  | 1.023015E-04  |
| 21    | C19   | -2.848396E-05 | 2.657463E-05  | 9.628403E-05  |
| 22    | C13   | 2.408297E-05  | -2.138977E-05 | 3.597858E-05  |
| 23    | C14   | -3.159769E-05 | -2.940765E-06 | 2.798203E-06  |
| 24    | C15   | 1.020427E-05  | 3.868718E-05  | 3.242492E-06  |
| 25    | C16   | -1.107397E-05 | 7.164699E-05  | 3.714214E-05  |
| 26    | C17   | 2.454009E-05  | 2.740372E-05  | 6.781483E-05  |
| 27    | H49   | 1.555452E-05  | -9.131242E-06 | 4.457840E-05  |
| 28    | H50   | -5.263221E-05 | 3.066533E-06  | -1.417887E-05 |
| 29    | H51   | -3.446707E-05 | -2.603146E-06 | -3.186609E-06 |
| 30    | H52   | -6.139078E-05 | -1.108176E-05 | 3.143102E-05  |
| 31    | H53   | 3.062427E-05  | -3.748239E-06 | 8.360005E-05  |
| 32    | H1    | 5.724637E-06  | 1.214301E-04  | 1.349199E-04  |
| 33    | H2    | -7.023272E-06 | 8.461312E-05  | 8.590751E-05  |
| 34    | H3    | -1.280987E-05 | 9.890039E-05  | 4.868153E-05  |
| 35    | H4    | 5.345632E-06  | 6.172204E-05  | 9.464836E-05  |
| total |       | -5.915017E-04 | 1.151239E-03  | 1.558628E-03  |

end of program der1b

start of program geopt 24

geometry optimization step 24

reading input hessian of dimension 105

in five columns format

reading input hessian of dimension 105

in five columns format

Level shifts adjusted to satisfy step-size constraints

Step size: 0.0101083

Cos(theta): 0.2841773

Final level shift: -2.7110409E-03

energy change: 1.0589E-05 \* ( 5.0000E-05 )

gradient maximum: 3.0562E-04 \* ( 4.5000E-04 )

gradient rms: 6.5247E-05 \* ( 3.0000E-04 )

step size: 0.01011 trust radius: 0.01000

displacement maximum: 3.9909E-03 . ( 1.8000E-03 )

displacement rms: 9.0411E-04 \* ( 1.2000E-03 )

predicted energy change: -1.1862E-06 geom step: 1.0108E-02 full step:  
1.0108E-02

molecular structure not yet converged...

center of mass moved by:

x: -5.5493E-04 y: 2.0702E-04 z: 1.7874E-04

new geometry:

|      | angstroms     |               |               |
|------|---------------|---------------|---------------|
| atom | x             | y             | z             |
| H25  | 0.9766539762  | 1.9935215693  | -4.1731207013 |
| C1   | 1.4989411433  | 2.0466001137  | -3.2386265740 |
| C2   | 2.8921639234  | 2.2078907946  | -0.7840752370 |
| C3   | 1.2183098758  | 1.1475386639  | -2.2178317329 |
| C4   | 2.4664628156  | 3.0094685773  | -3.0264607303 |
| C5   | 3.1563744008  | 3.0891002060  | -1.8128108169 |
| C6   | 1.9226429236  | 1.2504886507  | -1.0089283485 |
| C7   | 0.2875732485  | 0.0215021191  | -2.0906347417 |
| H27  | 2.6958765398  | 3.7103067773  | -3.8043311438 |
| H28  | 3.9020557818  | 3.8472617214  | -1.6805837341 |
| H30  | 3.4010893793  | 2.2440421376  | 0.1561088029  |
| C8   | 0.4661463414  | -0.4890998209 | -0.8644654096 |
| H32  | -0.4052396066 | -0.3068563486 | -2.8308017097 |
| C10  | -0.0749003226 | -1.5555369124 | 0.0585569919  |
| N2   | 1.4524279464  | 0.2365025989  | -0.1930562643 |
| C9   | 1.7603183817  | -0.2294338346 | 1.0650410267  |
| O1   | 2.5212077596  | 0.2927189970  | 1.8454459318  |
| H43  | -0.0684257450 | -2.5208869936 | -0.4288319332 |
| C12  | -1.4919766276 | -1.2422585441 | 0.5130584387  |
| C11  | 0.9842665898  | -1.5431047873 | 1.2274804060  |
| C19  | 0.4684082036  | -1.7223945943 | 2.6562604396  |
| C13  | -3.7203308437 | -1.9958955062 | 1.0345510214  |
| C14  | -3.1520685342 | 0.3142215507  | 1.2947845848  |
| C15  | -4.0840512628 | -0.7091095688 | 1.3844264952  |
| C16  | -1.8675920028 | 0.0505629947  | 0.8589311550  |
| C17  | -2.4292917471 | -2.2588449670 | 0.6021289594  |
| H49  | -4.4351249856 | -2.7926492403 | 1.0928861391  |
| H50  | -3.4281134758 | 1.3157288753  | 1.5585673954  |

|     |               |               |              |
|-----|---------------|---------------|--------------|
| H51 | -5.0811370596 | -0.5012737439 | 1.7179385773 |
| H52 | -1.1590893275 | 0.8503554591  | 0.7752083360 |
| H53 | -2.1567653513 | -3.2602438341 | 0.3289517437 |
| H1  | 1.3009494112  | -1.6365619841 | 3.3429010813 |
| H2  | 0.0106765116  | -2.6959230479 | 2.7784688928 |
| H3  | -0.2633972733 | -0.9681846735 | 2.9036210871 |
| H4  | 1.7076795392  | -2.3255506320 | 1.0149252583 |

nuclear repulsion energy..... 1458.306385664 hartrees

-----  
/ end of geometry optimization iteration 24 /  
-----

end of program geopt

start of program onee  
smallest eigenvalue of S: 1.216E-03  
number of canonical orbitals..... 210  
end of program onee

start of program probe  
end of program probe

start of program grid

number of gridpoints:

| atom     | H25 | C1  | C2  | C3  | C4  | C5  | C6  | C7  |
|----------|-----|-----|-----|-----|-----|-----|-----|-----|
| grid # 1 | 73  | 89  | 87  | 90  | 87  | 87  | 84  | 85  |
| grid # 2 | 106 | 100 | 97  | 98  | 98  | 98  | 90  | 92  |
| grid # 3 | 224 | 183 | 182 | 194 | 182 | 182 | 187 | 183 |
| grid # 4 | 224 | 379 | 381 | 406 | 379 | 379 | 373 | 378 |

number of gridpoints:

| atom     | H27 | H28 | H30 | C8  | H32 | C10 | N2  | C9  |
|----------|-----|-----|-----|-----|-----|-----|-----|-----|
| grid # 1 | 73  | 73  | 73  | 86  | 73  | 81  | 99  | 76  |
| grid # 2 | 106 | 106 | 105 | 92  | 106 | 93  | 109 | 81  |
| grid # 3 | 224 | 224 | 220 | 188 | 223 | 175 | 223 | 163 |
| grid # 4 | 224 | 224 | 219 | 377 | 229 | 351 | 401 | 328 |

number of gridpoints:

| atom     | O1  | H43 | C12 | C11 | C19 | C13 | C14 | C15 |
|----------|-----|-----|-----|-----|-----|-----|-----|-----|
| grid # 1 | 111 | 69  | 90  | 80  | 71  | 87  | 86  | 89  |
| grid # 2 | 127 | 98  | 106 | 91  | 74  | 100 | 99  | 100 |
| grid # 3 | 273 | 211 | 192 | 175 | 149 | 182 | 182 | 182 |
| grid # 4 | 475 | 205 | 397 | 361 | 304 | 378 | 379 | 378 |

number of gridpoints:

| atom     | C16 | C17 | H49 | H50 | H51 | H52 | H53 | H1  |
|----------|-----|-----|-----|-----|-----|-----|-----|-----|
| grid # 1 | 86  | 85  | 73  | 73  | 73  | 71  | 72  | 71  |
| grid # 2 | 97  | 99  | 106 | 106 | 106 | 100 | 103 | 99  |
| grid # 3 | 181 | 182 | 224 | 223 | 224 | 216 | 216 | 220 |
| grid # 4 | 376 | 377 | 224 | 223 | 224 | 211 | 215 | 221 |

number of gridpoints:

| atom     | H2  | H3  | H4  | total |
|----------|-----|-----|-----|-------|
| grid # 1 | 72  | 71  | 69  | 2815  |
| grid # 2 | 99  | 97  | 100 | 3484  |
| grid # 3 | 219 | 214 | 219 | 7041  |
| grid # 4 | 220 | 212 | 211 | 10843 |



end of program grid

start of program rwr  
recomputing Rwr matrix 8 grid: 4  
recomputing Rwr matrix 15 grid: 4  
end of program rwr

start of program scf

|      | i | u | d | i | g |                  |         | RMS     | maximum |
|------|---|---|---|---|---|------------------|---------|---------|---------|
|      | t | p | i | c | r |                  |         | density | DIIS    |
|      | e | d | i | u | i |                  | energy  | change  | error   |
|      | r | t | s | t | d | total energy     | change  |         |         |
| etot | 1 | N | N | 1 | U | -815.14075946834 |         | 1.4E-04 | 1.2E-03 |
| etot | 2 | Y | Y | 4 | M | -815.14080035572 | 4.1E-05 | 1.7E-05 | 2.7E-04 |
| etot | 3 | Y | Y | 4 | M | -815.14080267659 | 2.3E-06 | 4.2E-06 | 8.8E-05 |
| etot | 4 | Y | N | 4 | M | -815.14080332844 | 6.5E-07 | 0.0E+00 | 0.0E+00 |

Energy components, in hartrees:

|     |                               |                   |       |
|-----|-------------------------------|-------------------|-------|
| (A) | Nuclear repulsion.....        | 1458.30638566351  |       |
| (E) | Total one-electron terms..... | -4002.18191050153 |       |
| (I) | Total two-electron terms..... | 1728.73472150958  |       |
| (L) | Electronic energy.....        | -2273.44718899195 | (E+I) |
| (N) | Total energy.....             | -815.14080332844  | (A+L) |

SCFE: SCF energy: HF -815.14080332844 hartrees iterations: 4

HOMO energy: -0.29718  
LUMO energy: 0.11766

Orbital energies:

|           |           |           |           |           |           |
|-----------|-----------|-----------|-----------|-----------|-----------|
| -20.45408 | -15.55201 | -11.32157 | -11.23571 | -11.22323 | -11.21484 |
| -11.20782 | -11.19953 | -11.18798 | -11.18558 | -11.18509 | -11.18432 |
| -11.18290 | -11.18238 | -11.17939 | -11.17765 | -11.17729 | -11.17601 |
| -11.17267 | -11.16452 | -1.42374  | -1.33327  | -1.18045  | -1.16235  |
| -1.11404  | -1.08794  | -1.03812  | -1.02700  | -1.01979  | -1.00135  |
| -0.94882  | -0.90505  | -0.85222  | -0.84380  | -0.83043  | -0.81100  |
| -0.79133  | -0.76041  | -0.72219  | -0.68652  | -0.68144  | -0.66768  |
| -0.65698  | -0.64292  | -0.64012  | -0.62491  | -0.61381  | -0.60775  |
| -0.60456  | -0.60056  | -0.59240  | -0.58269  | -0.55139  | -0.55049  |
| -0.53309  | -0.52501  | -0.51627  | -0.51344  | -0.49861  | -0.49486  |
| -0.48924  | -0.48498  | -0.45836  | -0.42194  | -0.39446  | -0.34883  |
| -0.34233  | -0.31552  | -0.29718  | 0.11766   | 0.13220   | 0.14167   |
| 0.14378   | 0.20501   | 0.22191   | 0.26536   | 0.27156   | 0.28089   |
| 0.30572   |           |           |           |           |           |

end of program scf

start of program derla  
end of program derla

start of program rwr  
recomputing Rwr matrix 8 grid: 4  
recomputing Rwr matrix 15 grid: 4

end of program rwr

start of program derlb

forces (hartrees/bohr) : total

| atom  | label | x             | y             | z             |
|-------|-------|---------------|---------------|---------------|
| 1     | H25   | -2.174256E-05 | -2.010735E-05 | 2.420233E-05  |
| 2     | C1    | -2.784272E-05 | -1.054690E-05 | -7.113078E-05 |
| 3     | C2    | -7.060032E-05 | 7.905332E-05  | -8.275811E-06 |
| 4     | C3    | 5.946665E-06  | -4.789096E-06 | 5.474077E-06  |
| 5     | C4    | -3.732817E-05 | 6.827876E-05  | -8.270808E-05 |
| 6     | C5    | -1.779339E-05 | 7.021575E-05  | 1.359203E-04  |
| 7     | C6    | 5.547163E-05  | -3.015761E-05 | -6.643653E-06 |
| 8     | C7    | 5.893936E-05  | 4.455628E-05  | 2.244565E-04  |
| 9     | H27   | -6.648433E-05 | -8.801143E-05 | 6.113848E-05  |
| 10    | H28   | -8.479674E-05 | -2.361985E-05 | 3.163262E-05  |
| 11    | H30   | -1.734745E-05 | 6.300727E-05  | 7.830478E-05  |
| 12    | C8    | 1.690917E-05  | 3.371846E-05  | -7.239758E-05 |
| 13    | H32   | 1.077967E-05  | 1.818886E-06  | 7.584221E-05  |
| 14    | C10   | -5.525958E-05 | -1.672886E-04 | 3.993986E-05  |
| 15    | N2    | -2.211731E-04 | 1.580615E-04  | 2.293587E-04  |
| 16    | C9    | 2.784162E-04  | 3.048050E-04  | 2.073943E-04  |
| 17    | O1    | -2.578751E-04 | -5.917226E-05 | -3.545012E-04 |
| 18    | H43   | 4.731811E-05  | 1.335886E-04  | 1.238564E-04  |
| 19    | C12   | -6.108574E-05 | 2.773814E-05  | 1.659213E-06  |
| 20    | C11   | 1.202707E-04  | 7.768341E-05  | -7.001198E-05 |
| 21    | C19   | 6.427689E-05  | -2.926116E-05 | 7.536898E-05  |
| 22    | C13   | 6.417692E-06  | -6.316425E-05 | 3.602753E-05  |
| 23    | C14   | -7.686390E-05 | -1.470637E-05 | 5.727246E-05  |
| 24    | C15   | -5.817094E-05 | 6.750750E-05  | 5.096151E-05  |
| 25    | C16   | -1.002148E-04 | 5.487732E-05  | -2.871763E-05 |
| 26    | C17   | -2.653686E-05 | 4.756824E-05  | 5.031013E-05  |
| 27    | H49   | 8.655136E-05  | 4.087091E-05  | 4.432713E-05  |
| 28    | H50   | -2.919648E-05 | -2.713686E-05 | -1.629858E-05 |
| 29    | H51   | 8.598651E-05  | -2.996359E-05 | -1.817425E-05 |
| 30    | H52   | -6.435736E-05 | -6.654054E-05 | 2.016367E-05  |
| 31    | H53   | 2.490063E-05  | 4.157492E-05  | 7.352076E-05  |
| 32    | H1    | 6.064471E-05  | 1.110858E-04  | 7.882446E-05  |
| 33    | H2    | -5.897999E-05 | -1.389542E-05 | 1.112756E-04  |
| 34    | H3    | -2.222331E-04 | 2.909106E-04  | 8.961558E-05  |
| 35    | H4    | 4.030149E-06  | 6.583437E-05  | 1.228312E-04  |
| total |       | -6.490233E-04 | 1.134394E-03  | 1.320819E-03  |

end of program derlb

start of program geopt 25

geometry optimization step 25

\*\* stopping now - optimization seems to be stuck \*\*

```
*****
**               Geometry optimization complete               **
*****
```

center of mass moved by:

x: 0.0000E+00 y: 0.0000E+00 z: 0.0000E+00

final geometry:

|      | angstroms     |               |               |
|------|---------------|---------------|---------------|
| atom | x             | y             | z             |
| H25  | 0.9766539762  | 1.9935215693  | -4.1731207013 |
| C1   | 1.4989411433  | 2.0466001137  | -3.2386265740 |
| C2   | 2.8921639234  | 2.2078907946  | -0.7840752370 |
| C3   | 1.2183098758  | 1.1475386639  | -2.2178317329 |
| C4   | 2.4664628156  | 3.0094685773  | -3.0264607303 |
| C5   | 3.1563744008  | 3.0891002060  | -1.8128108169 |
| C6   | 1.9226429236  | 1.2504886507  | -1.0089283485 |
| C7   | 0.2875732485  | 0.0215021191  | -2.0906347417 |
| H27  | 2.6958765398  | 3.7103067773  | -3.8043311438 |
| H28  | 3.9020557818  | 3.8472617214  | -1.6805837341 |
| H30  | 3.4010893793  | 2.2440421376  | 0.1561088029  |
| C8   | 0.4661463414  | -0.4890998209 | -0.8644654096 |
| H32  | -0.4052396066 | -0.3068563486 | -2.8308017097 |
| C10  | -0.0749003226 | -1.5555369124 | 0.0585569919  |
| N2   | 1.4524279464  | 0.2365025989  | -0.1930562643 |
| C9   | 1.7603183817  | -0.2294338346 | 1.0650410267  |
| O1   | 2.5212077596  | 0.2927189970  | 1.8454459318  |
| H43  | -0.0684257450 | -2.5208869936 | -0.4288319332 |
| C12  | -1.4919766276 | -1.2422585441 | 0.5130584387  |
| C11  | 0.9842665898  | -1.5431047873 | 1.2274804060  |
| C19  | 0.4684082036  | -1.7223945943 | 2.6562604396  |
| C13  | -3.7203308437 | -1.9958955062 | 1.0345510214  |
| C14  | -3.1520685342 | 0.3142215507  | 1.2947845848  |
| C15  | -4.0840512628 | -0.7091095688 | 1.3844264952  |
| C16  | -1.8675920028 | 0.0505629947  | 0.8589311550  |
| C17  | -2.4292917471 | -2.2588449670 | 0.6021289594  |
| H49  | -4.4351249856 | -2.7926492403 | 1.0928861391  |
| H50  | -3.4281134758 | 1.3157288753  | 1.5585673954  |
| H51  | -5.0811370596 | -0.5012737439 | 1.7179385773  |
| H52  | -1.1590893275 | 0.8503554591  | 0.7752083360  |
| H53  | -2.1567653513 | -3.2602438341 | 0.3289517437  |
| H1   | 1.3009494112  | -1.6365619841 | 3.3429010813  |
| H2   | 0.0106765116  | -2.6959230479 | 2.7784688928  |
| H3   | -0.2633972733 | -0.9681846735 | 2.9036210871  |
| H4   | 1.7076795392  | -2.3255506320 | 1.0149252583  |

nuclear repulsion energy..... 1458.306385664 hartrees

/ end of geometry optimization iteration 25 /

end of program geopt

start of program post  
Writing a SPARTAN archive file  
end of program post

Total cpu seconds      user:      1404.719      user+sys:      1404.719

#### 4. REFERENCES

- [1] A. Arcadi, A. Calcaterra, M. Chiarini, G. Fabrizi, A. Fochetti, A. Goggiamani, A. Iazzetti, F. Marrone, V. Marsicano, A. Serraiocco, *Synthesis* 2021, **54**, 741-753.
- [2] S. Hammoud, E. Anselmi, K. Cherry, J.-C. Kizirian, J. Thibonnet, *Eur. J. Org. Chem.* 2018, **45**, 6314-6327.
- [3] Y. Goriya, C. V. Ramana, *Chem. Comm.* 2014, **50**, 7790-7792.
- [4] V. Collot, M. Schmitt, P. Marwah, J.-J. Bourguignon, *Heterocycles*, 1999, **51**, 2823-2847.
- [5] R. Akunuri, V. Veerareddy, G. Kaul, A. Akhir, T. Unnissa, R. Parupalli, Y. V. Madhavi, S. Chopra, S. Nanduri, *Bioorg. Chem.* 2021, **116**, 105288.

# $^1\text{H}$ NMR-spectrum (400 MHz, $\text{CDCl}_3$ )

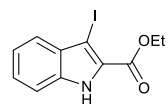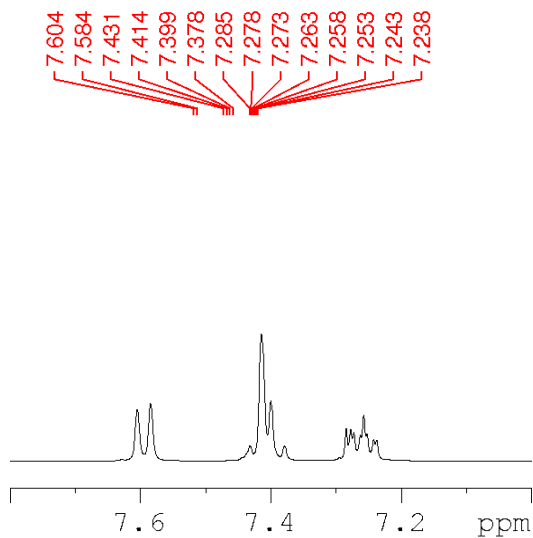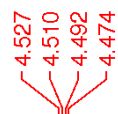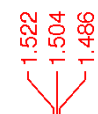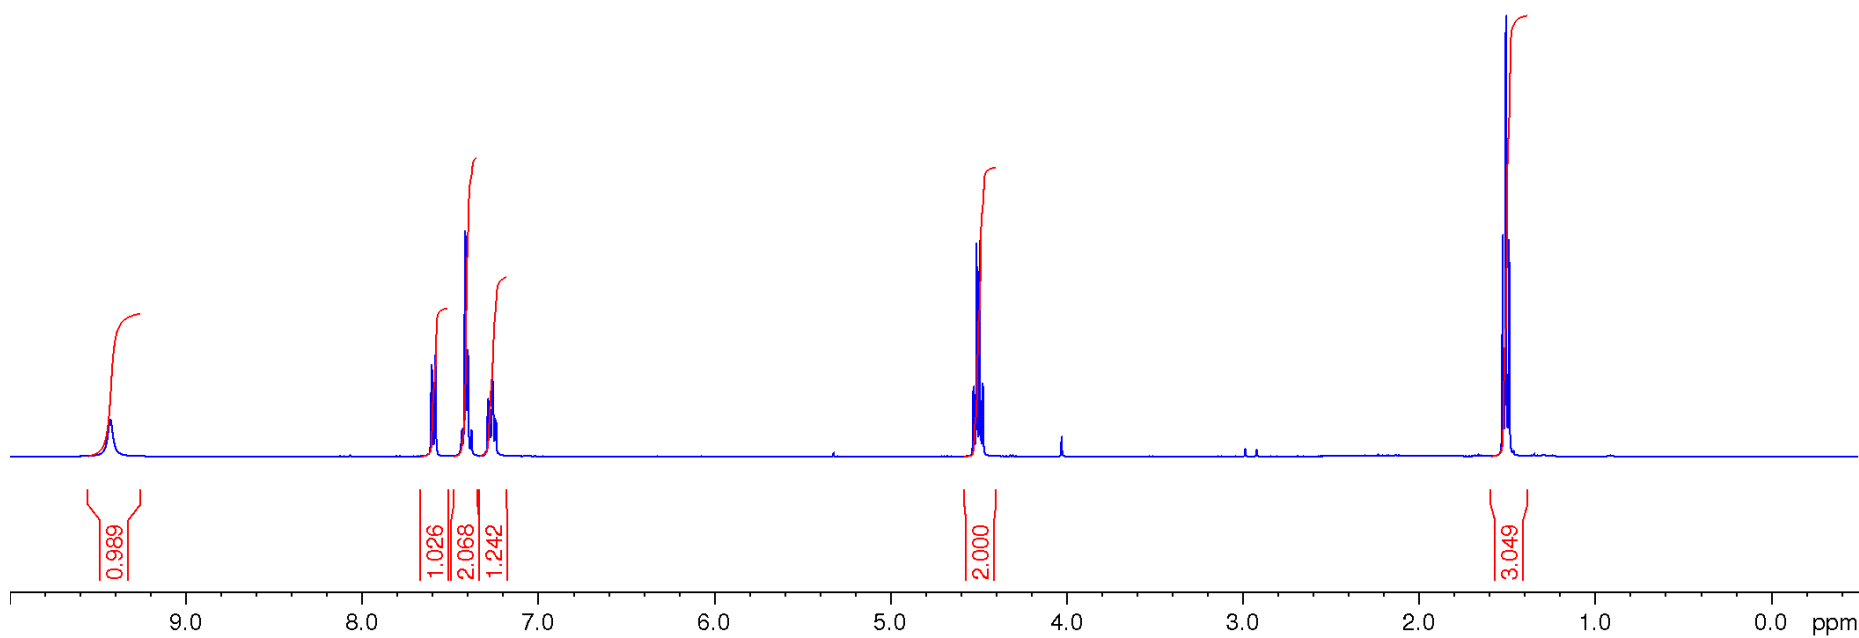

$^{13}\text{C}$  NMR-spectrum (100 MHz,  $\text{CDCl}_3$ )

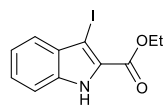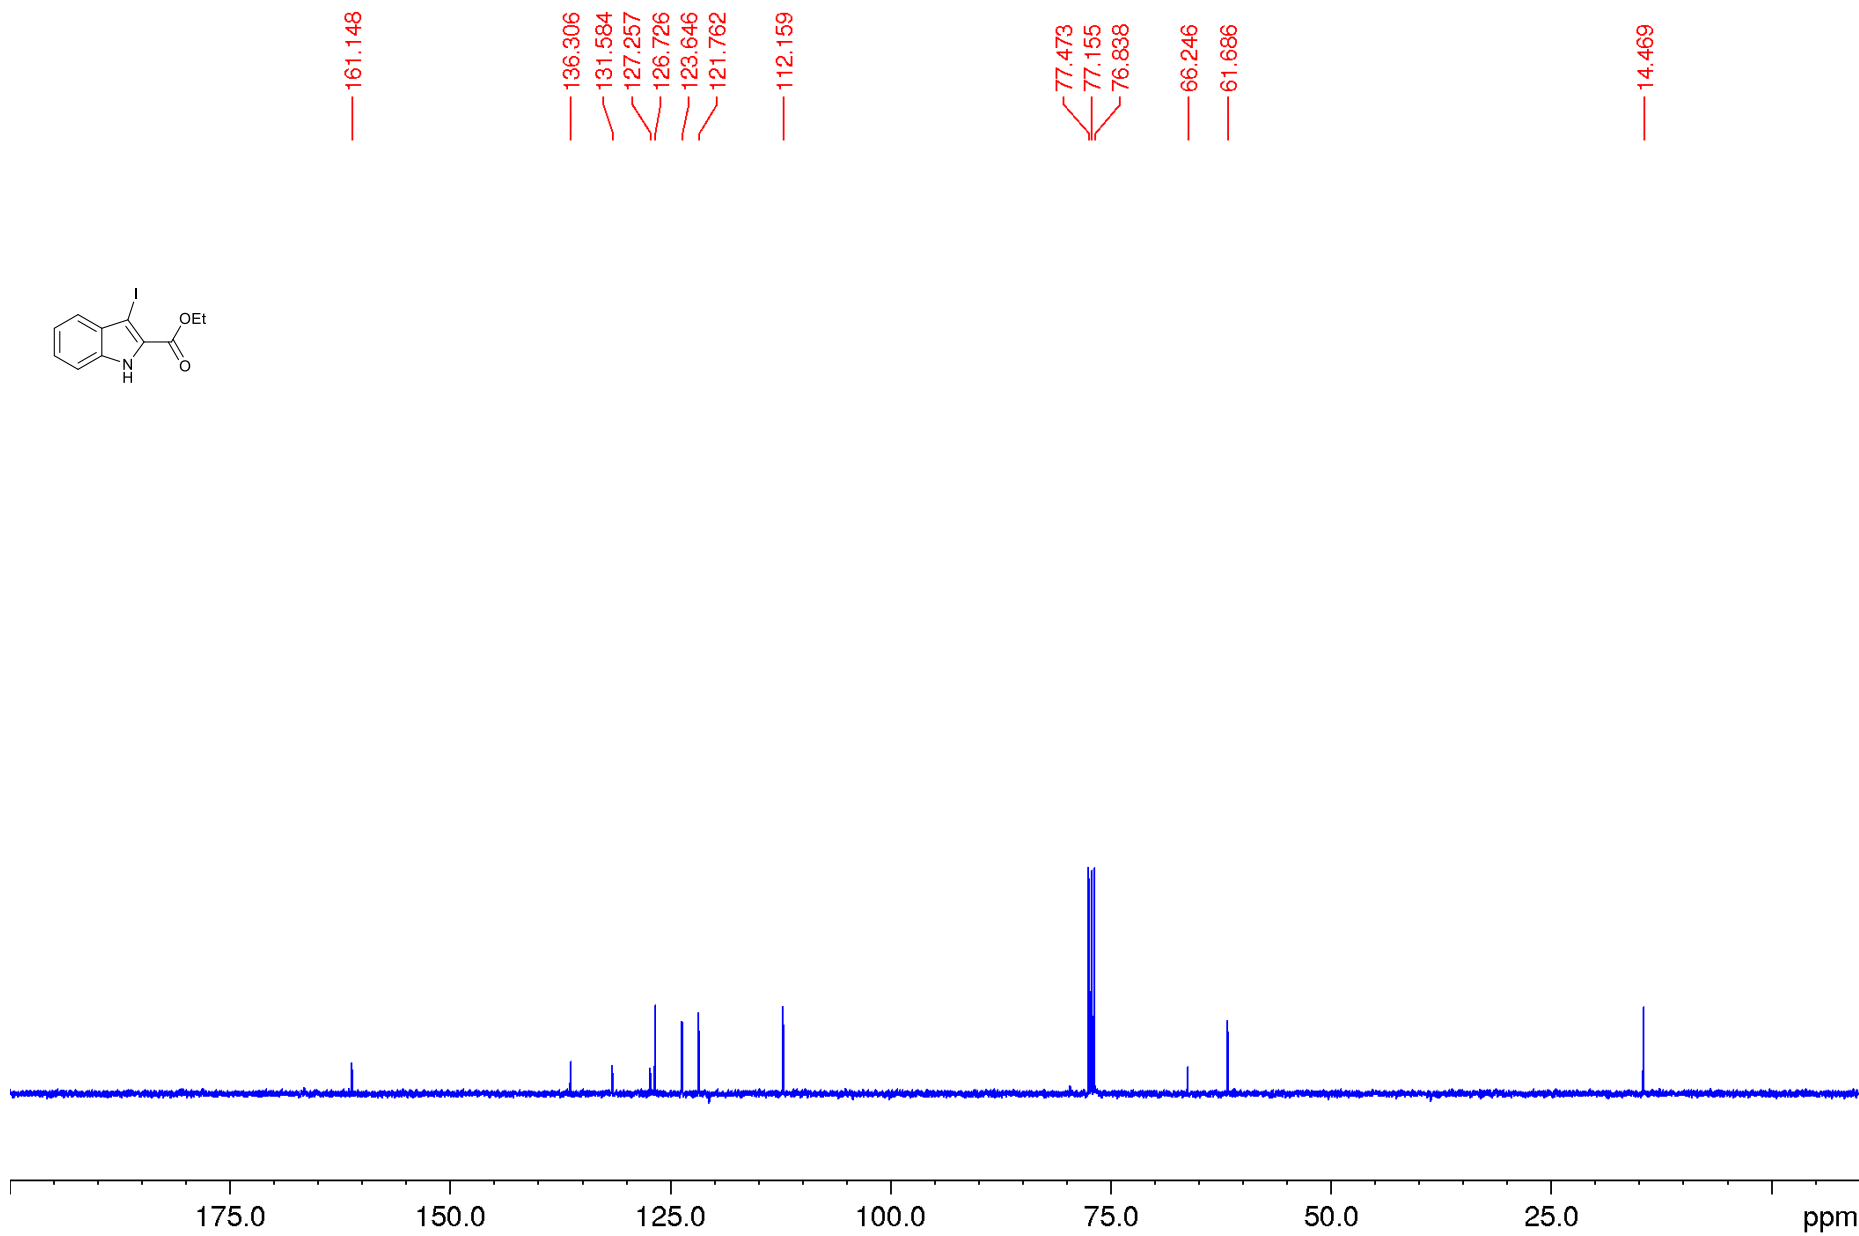

# DEPT 135 NMR-spectrum (CDCl<sub>3</sub>)

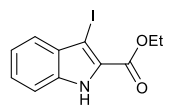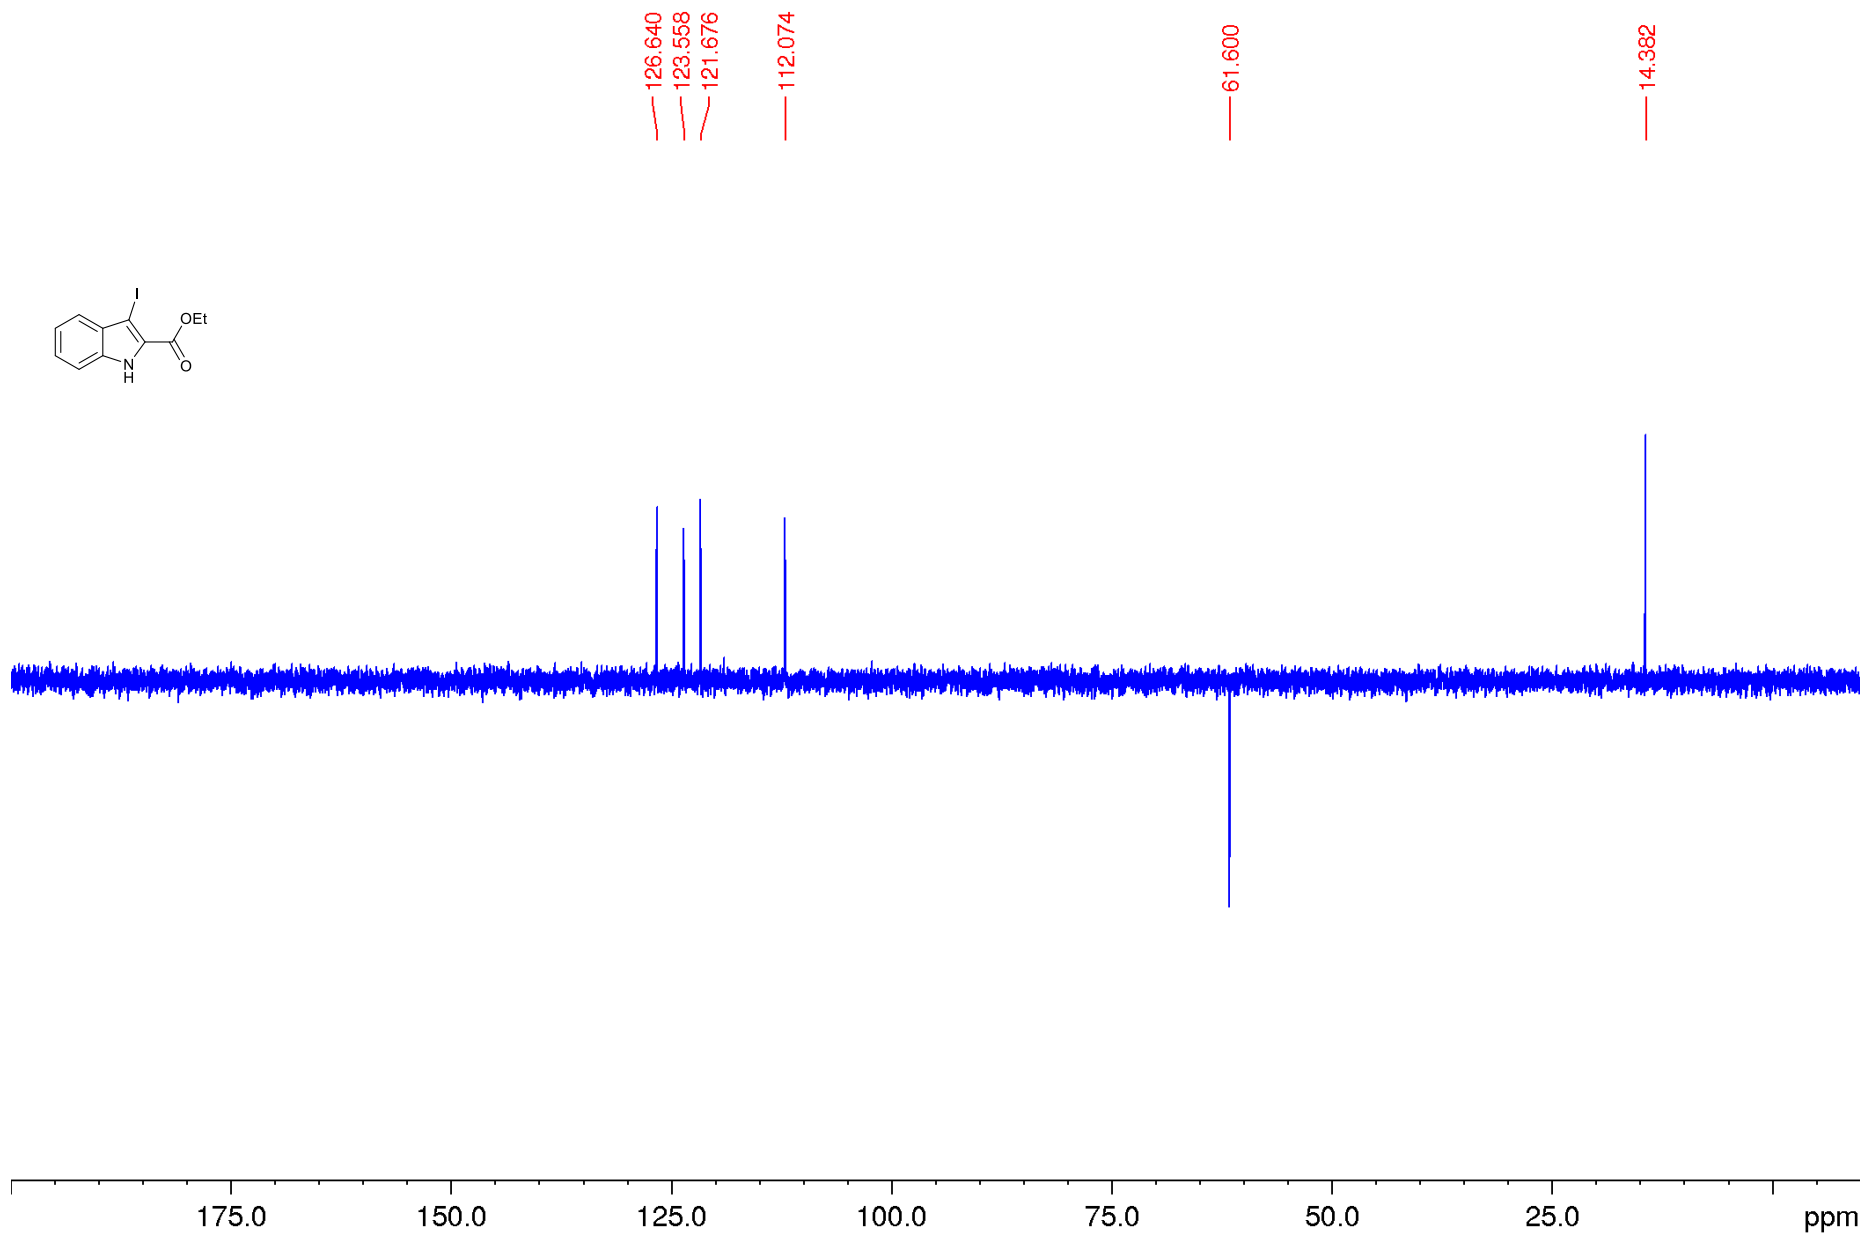

# $^1\text{H}$ NMR-spectrum (400 MHz, $\text{CDCl}_3$ )

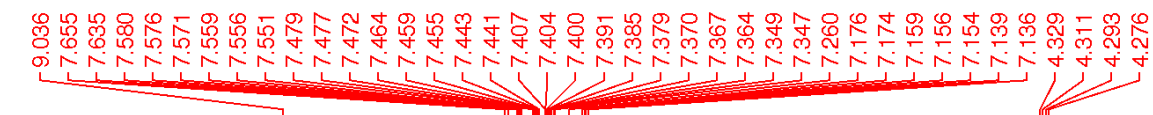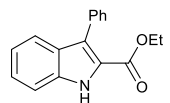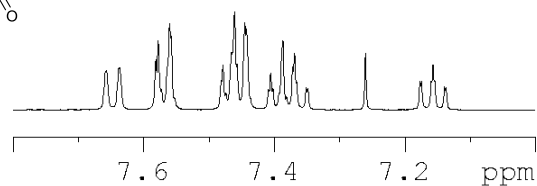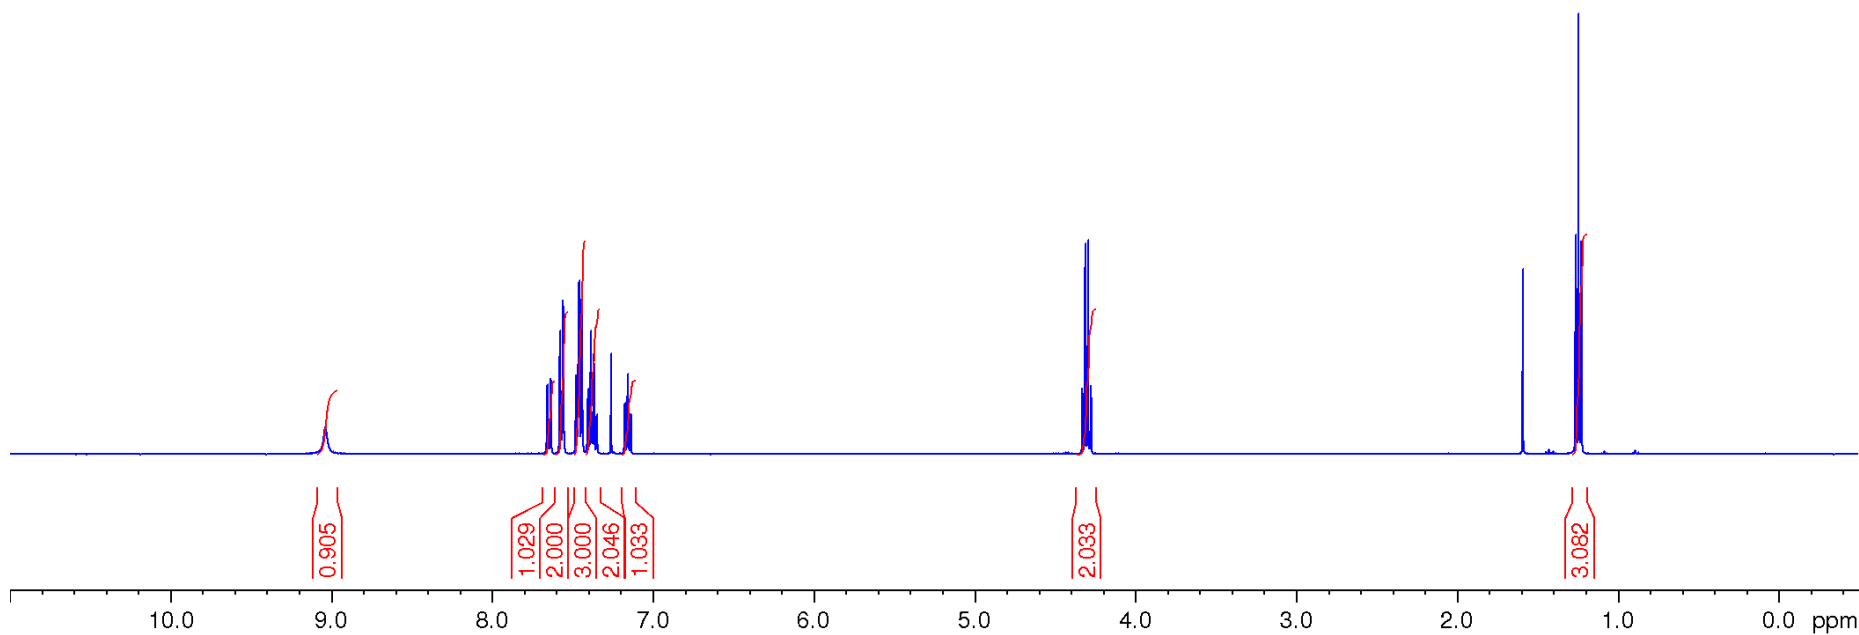



$^{13}\text{C}$  NMR-spectrum (100 MHz,  $\text{CDCl}_3$ )

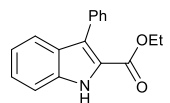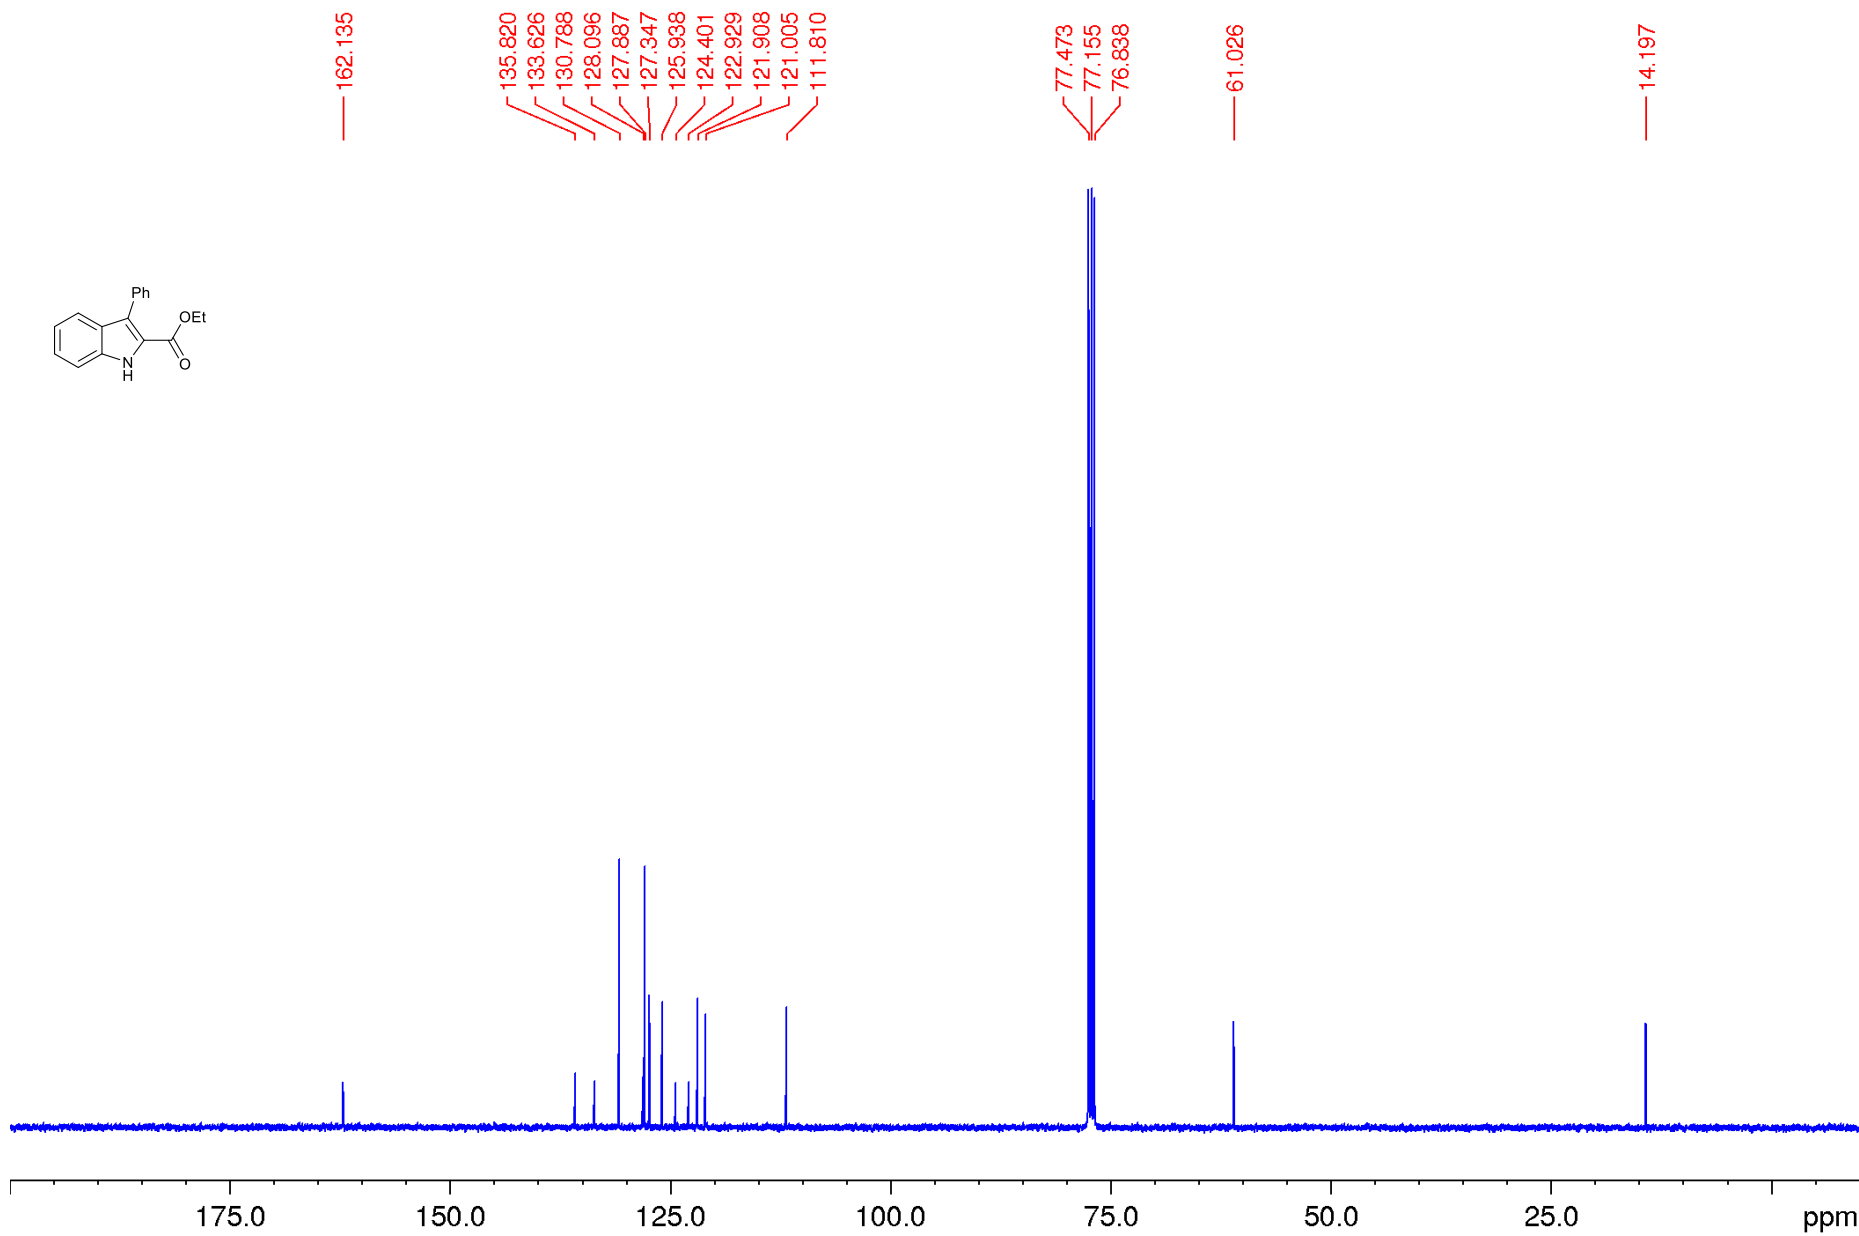

# DEPT 135 NMR-spectrum (CDCl<sub>3</sub>)

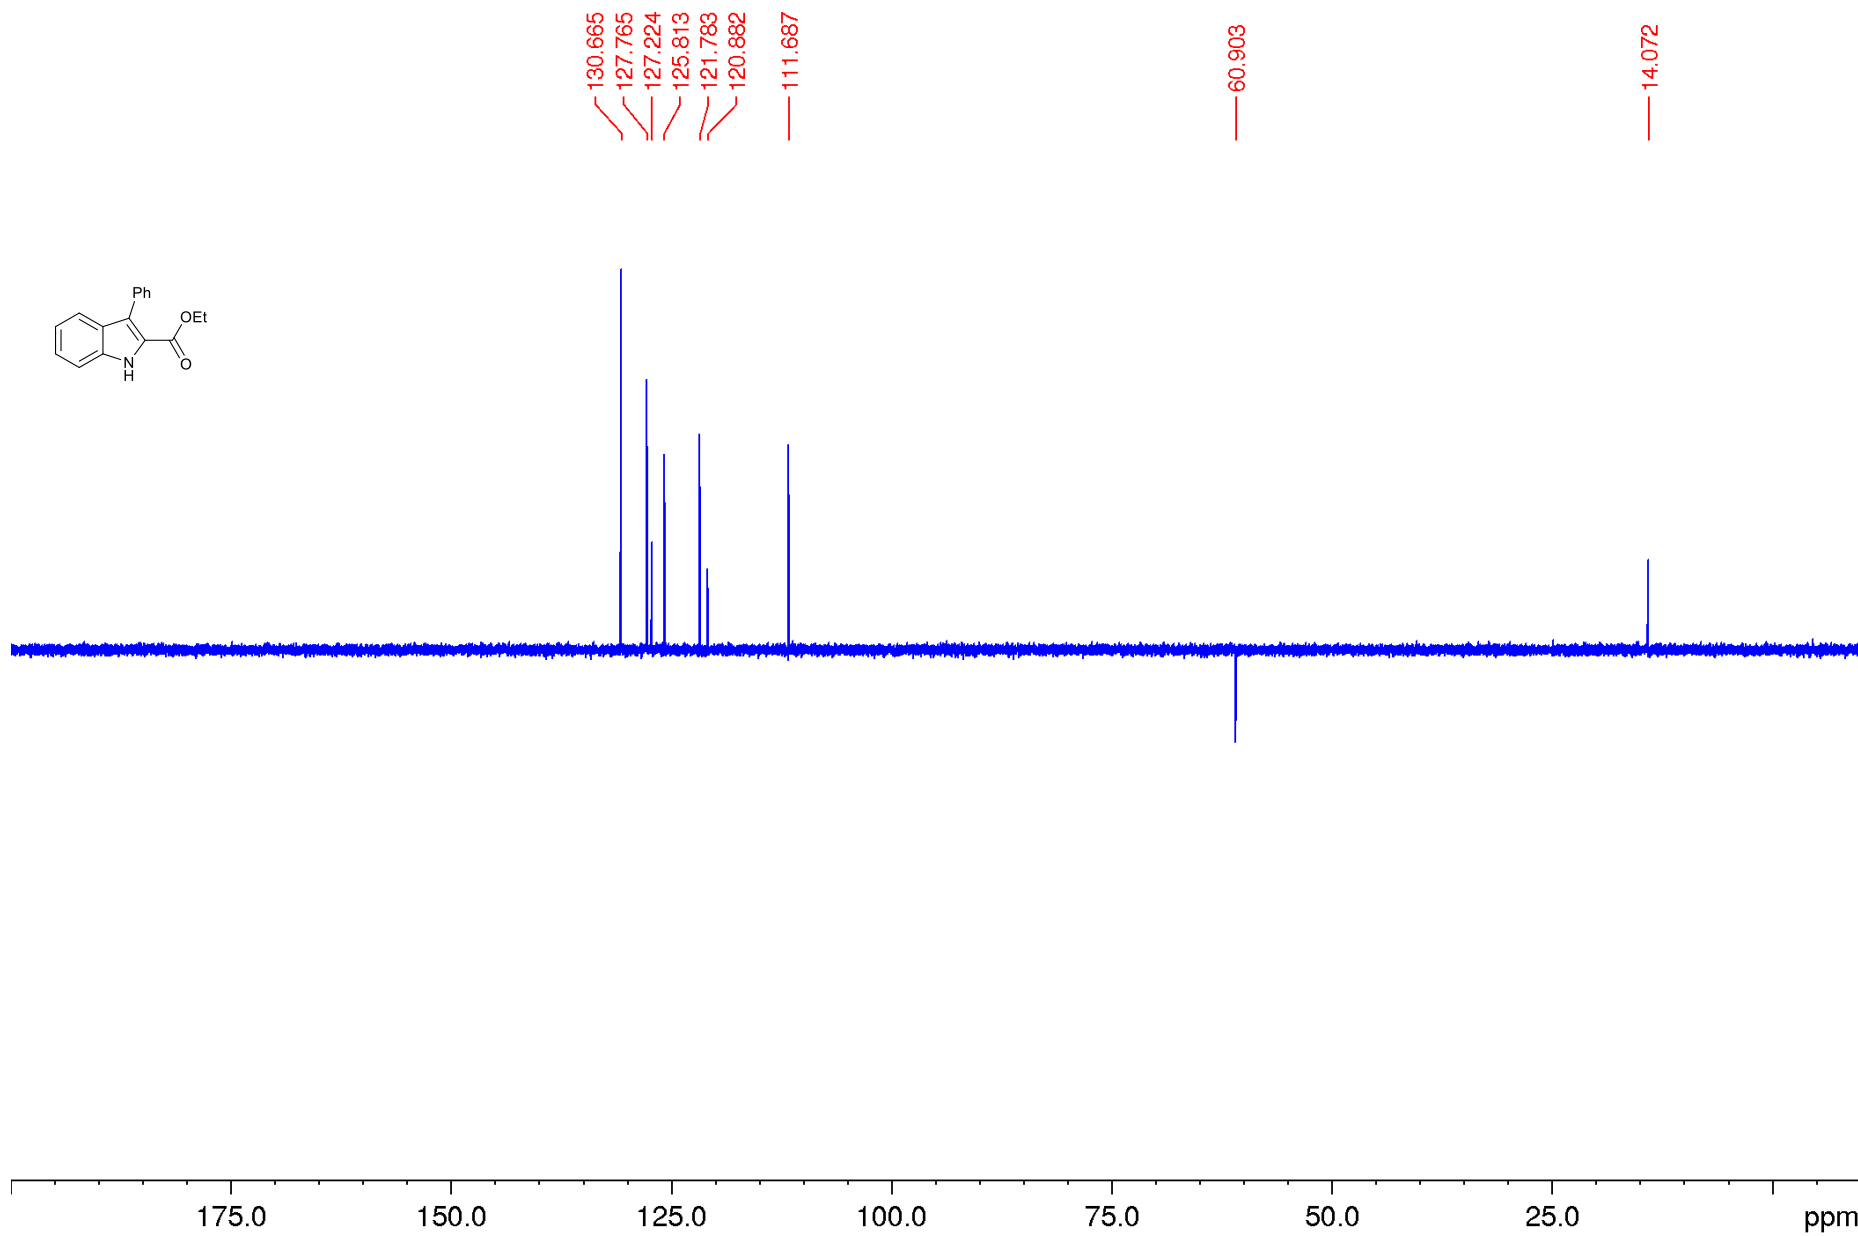

# $^1\text{H}$ NMR-spectrum (400 MHz, $\text{CDCl}_3$ )

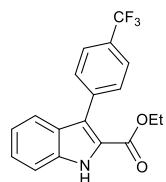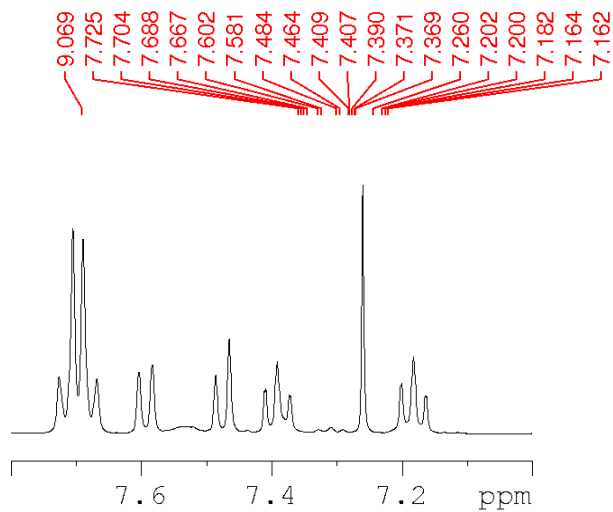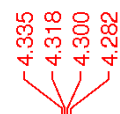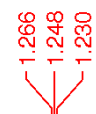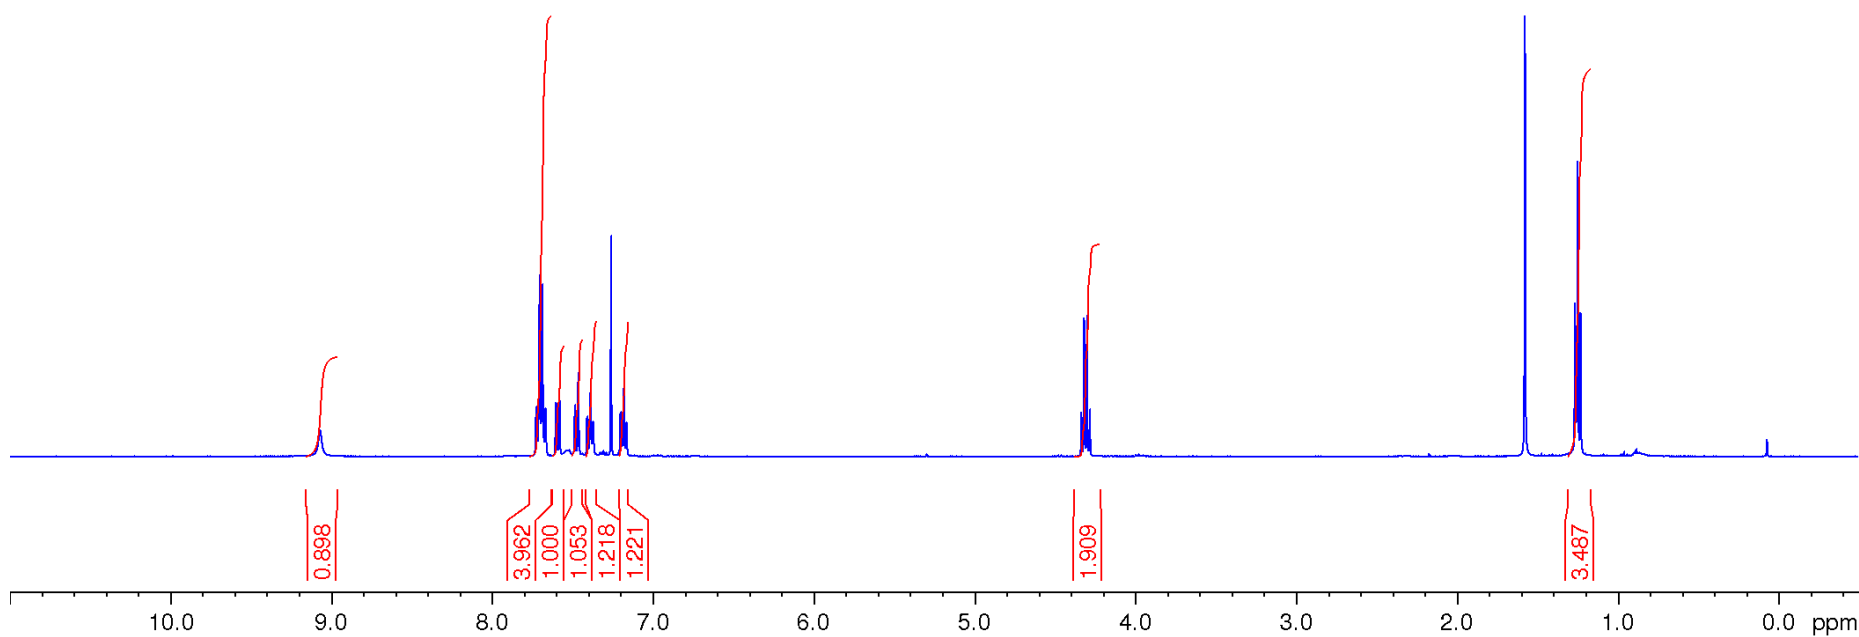

$^{13}\text{C}$  NMR-spectrum (100 MHz,  $\text{CDCl}_3$ )

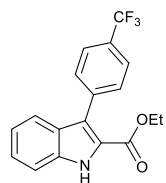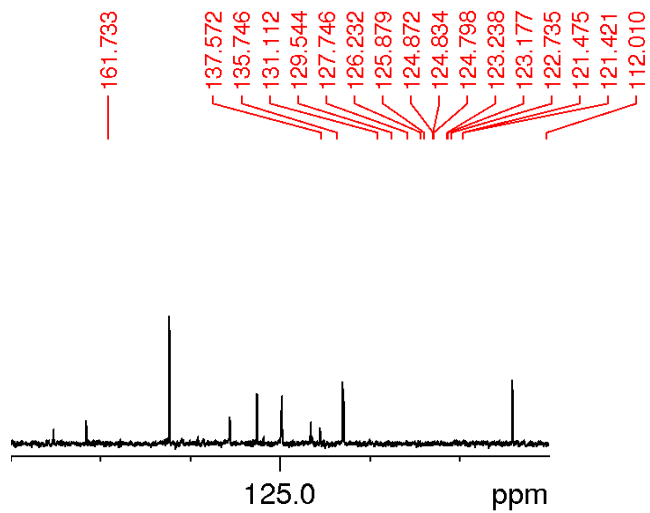

77.475  
77.157  
76.840

61.263

14.204

175.0

150.0

125.0

100.0

75.0

50.0

25.0

ppm

# DEPT 135 NMR-spectrum (CDCl<sub>3</sub>)

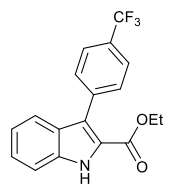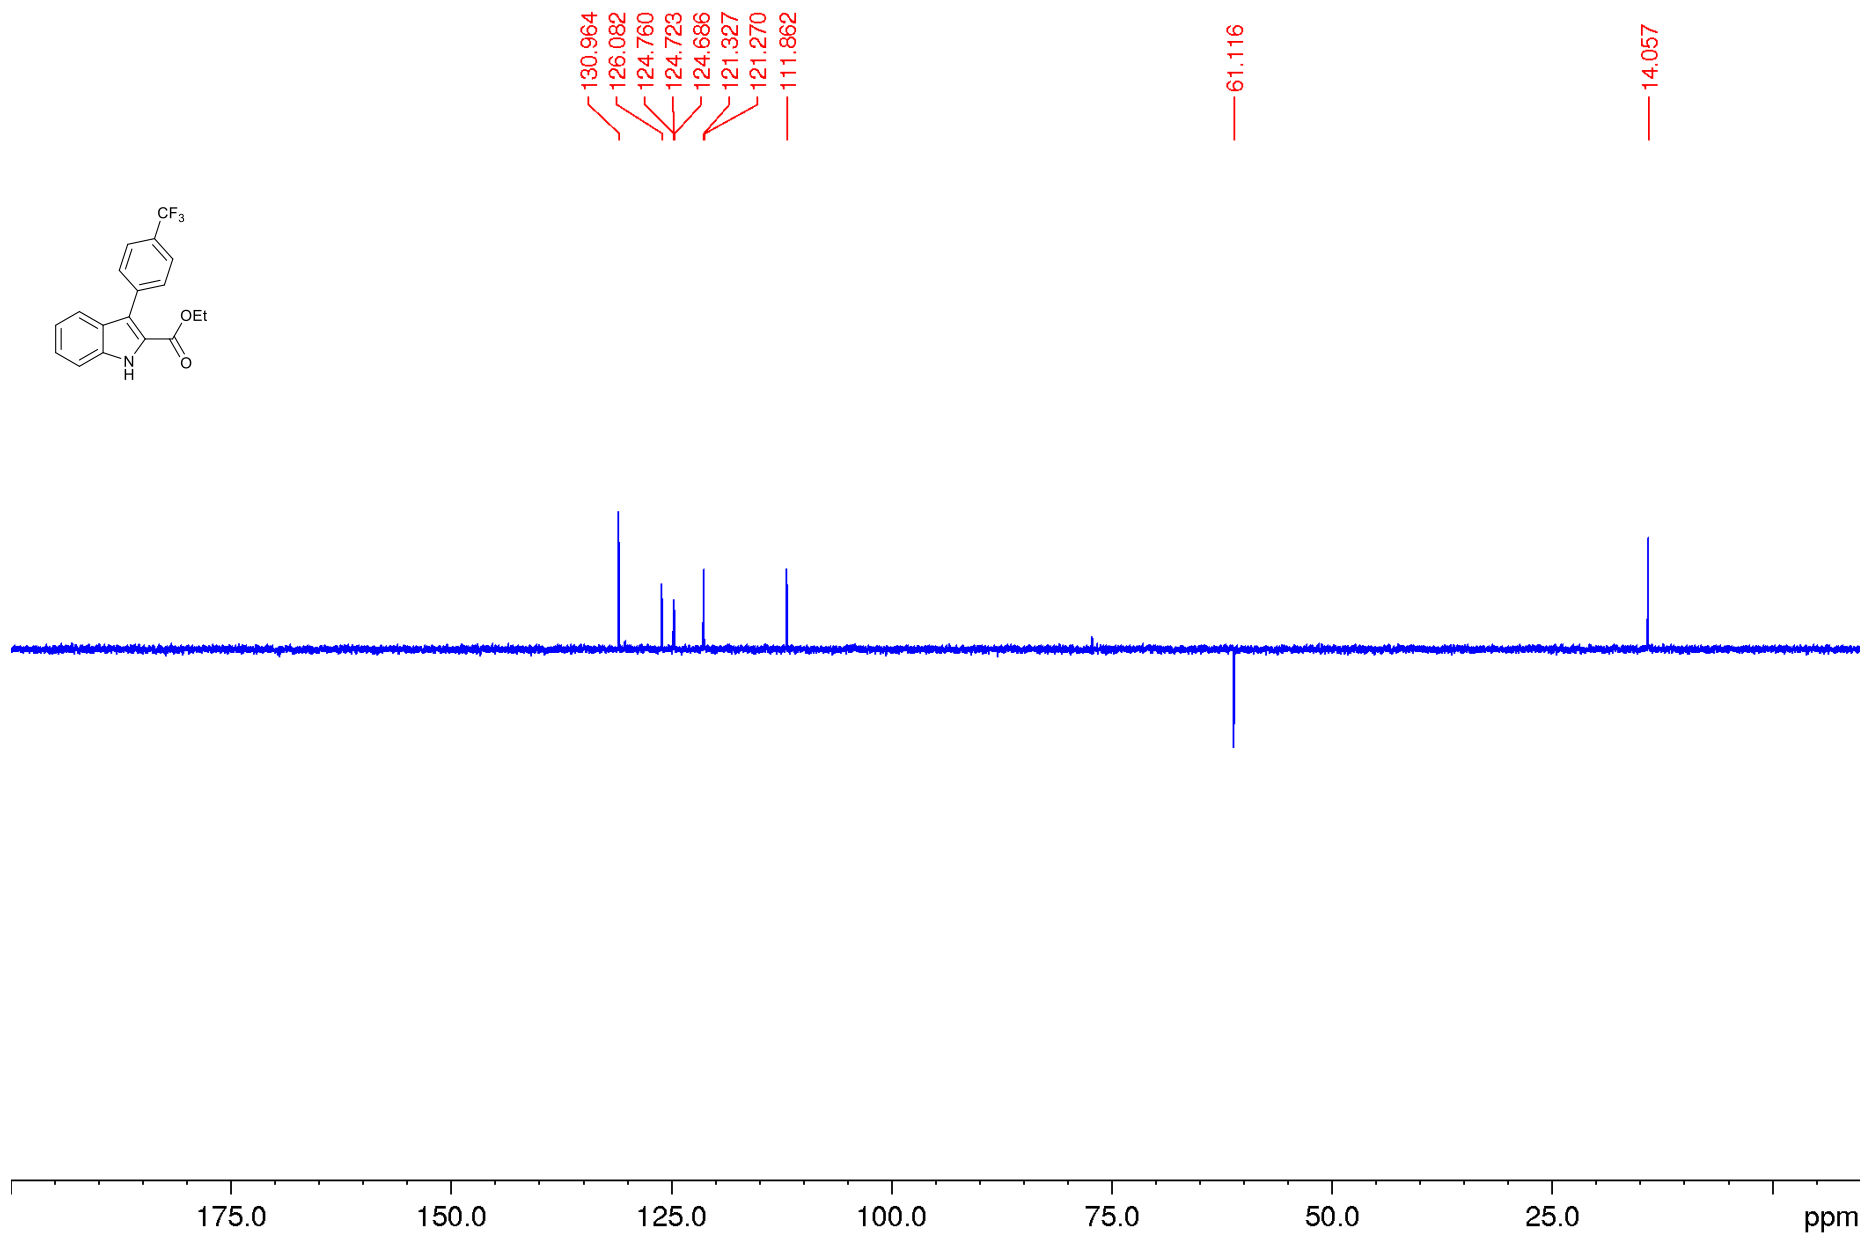

$^{19}\text{F}$  NMR-spectrum (376.5 MHz,  $\text{CDCl}_3$ )

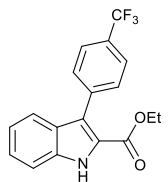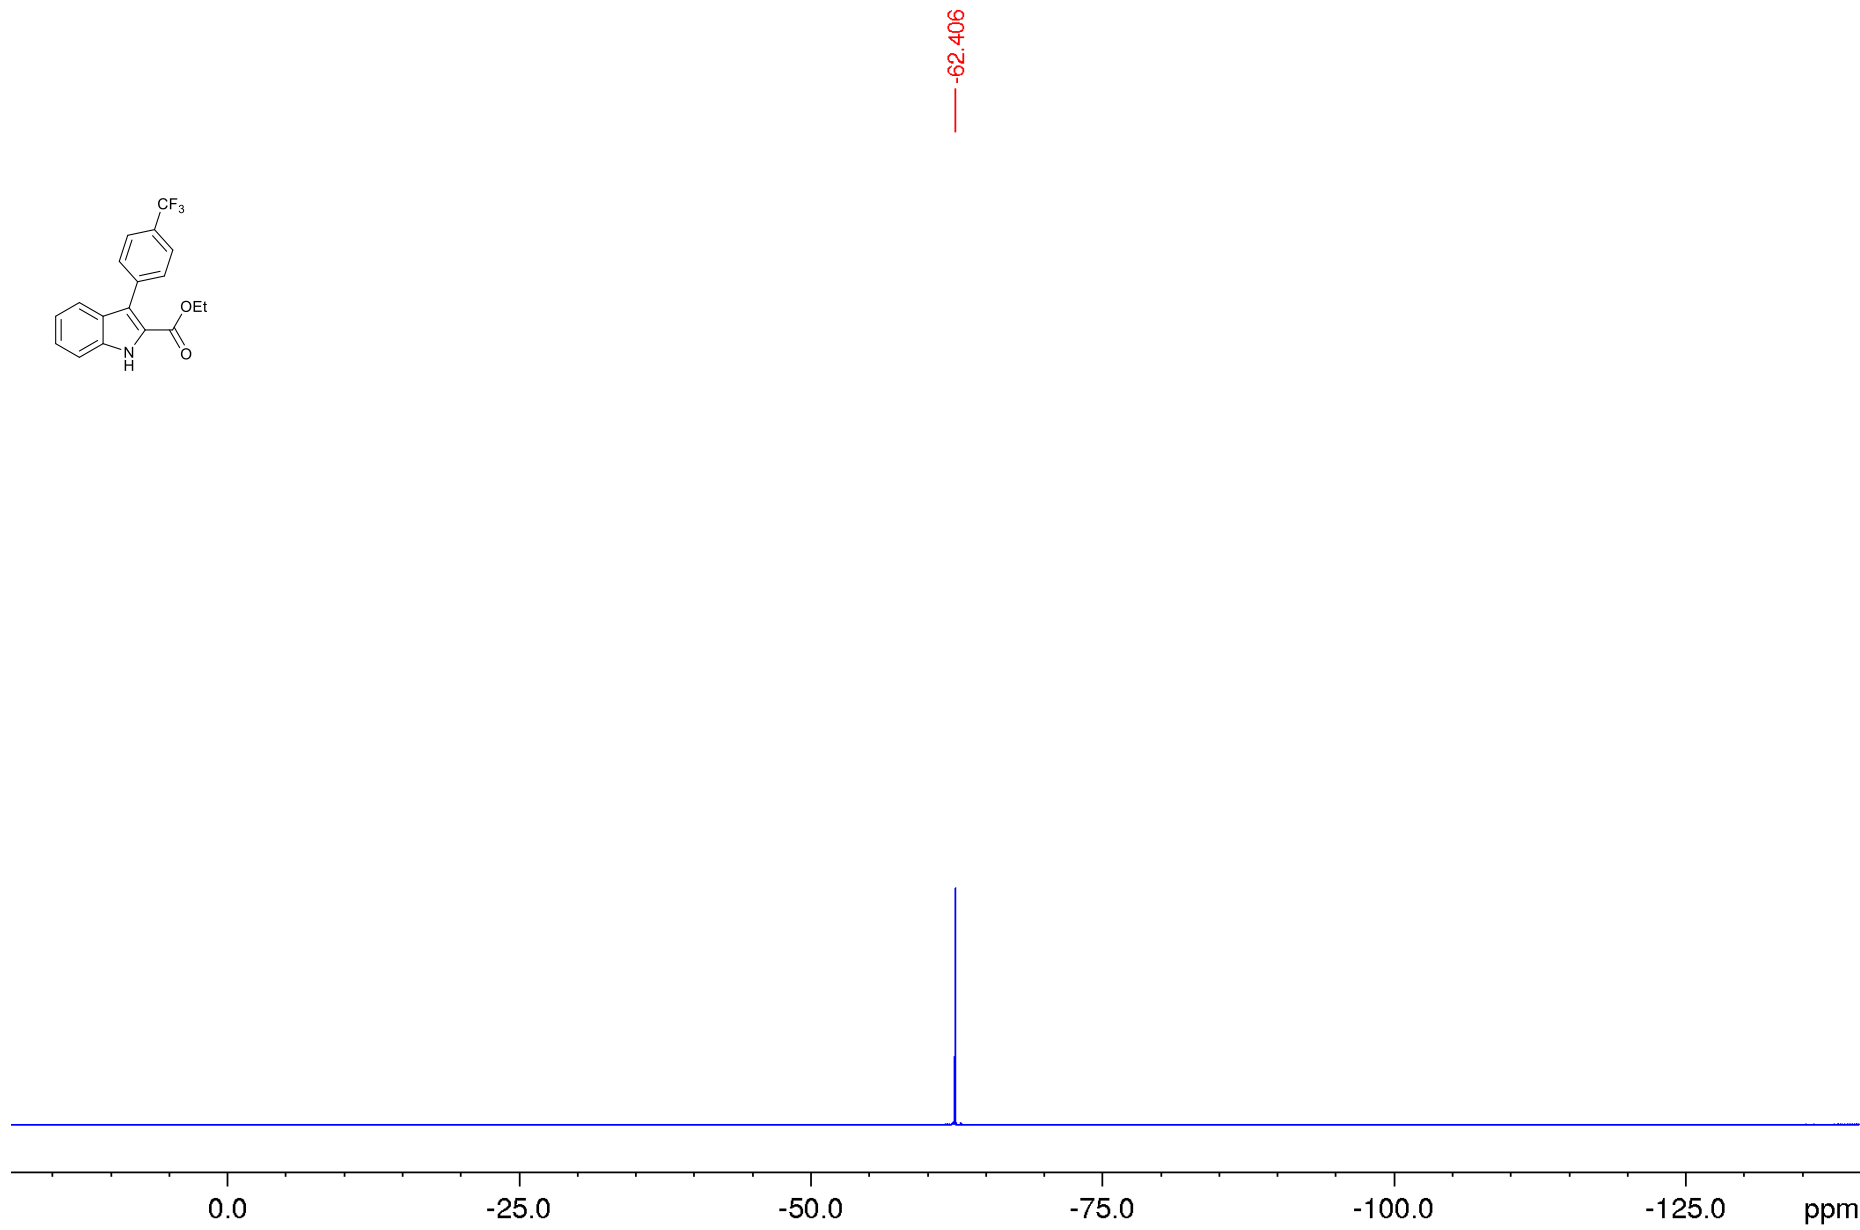

# <sup>1</sup>H NMR-spectrum (400 MHz, CDCl<sub>3</sub>)

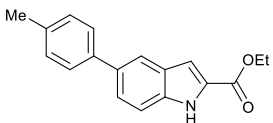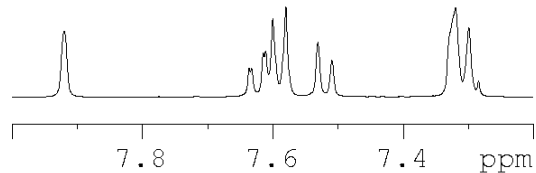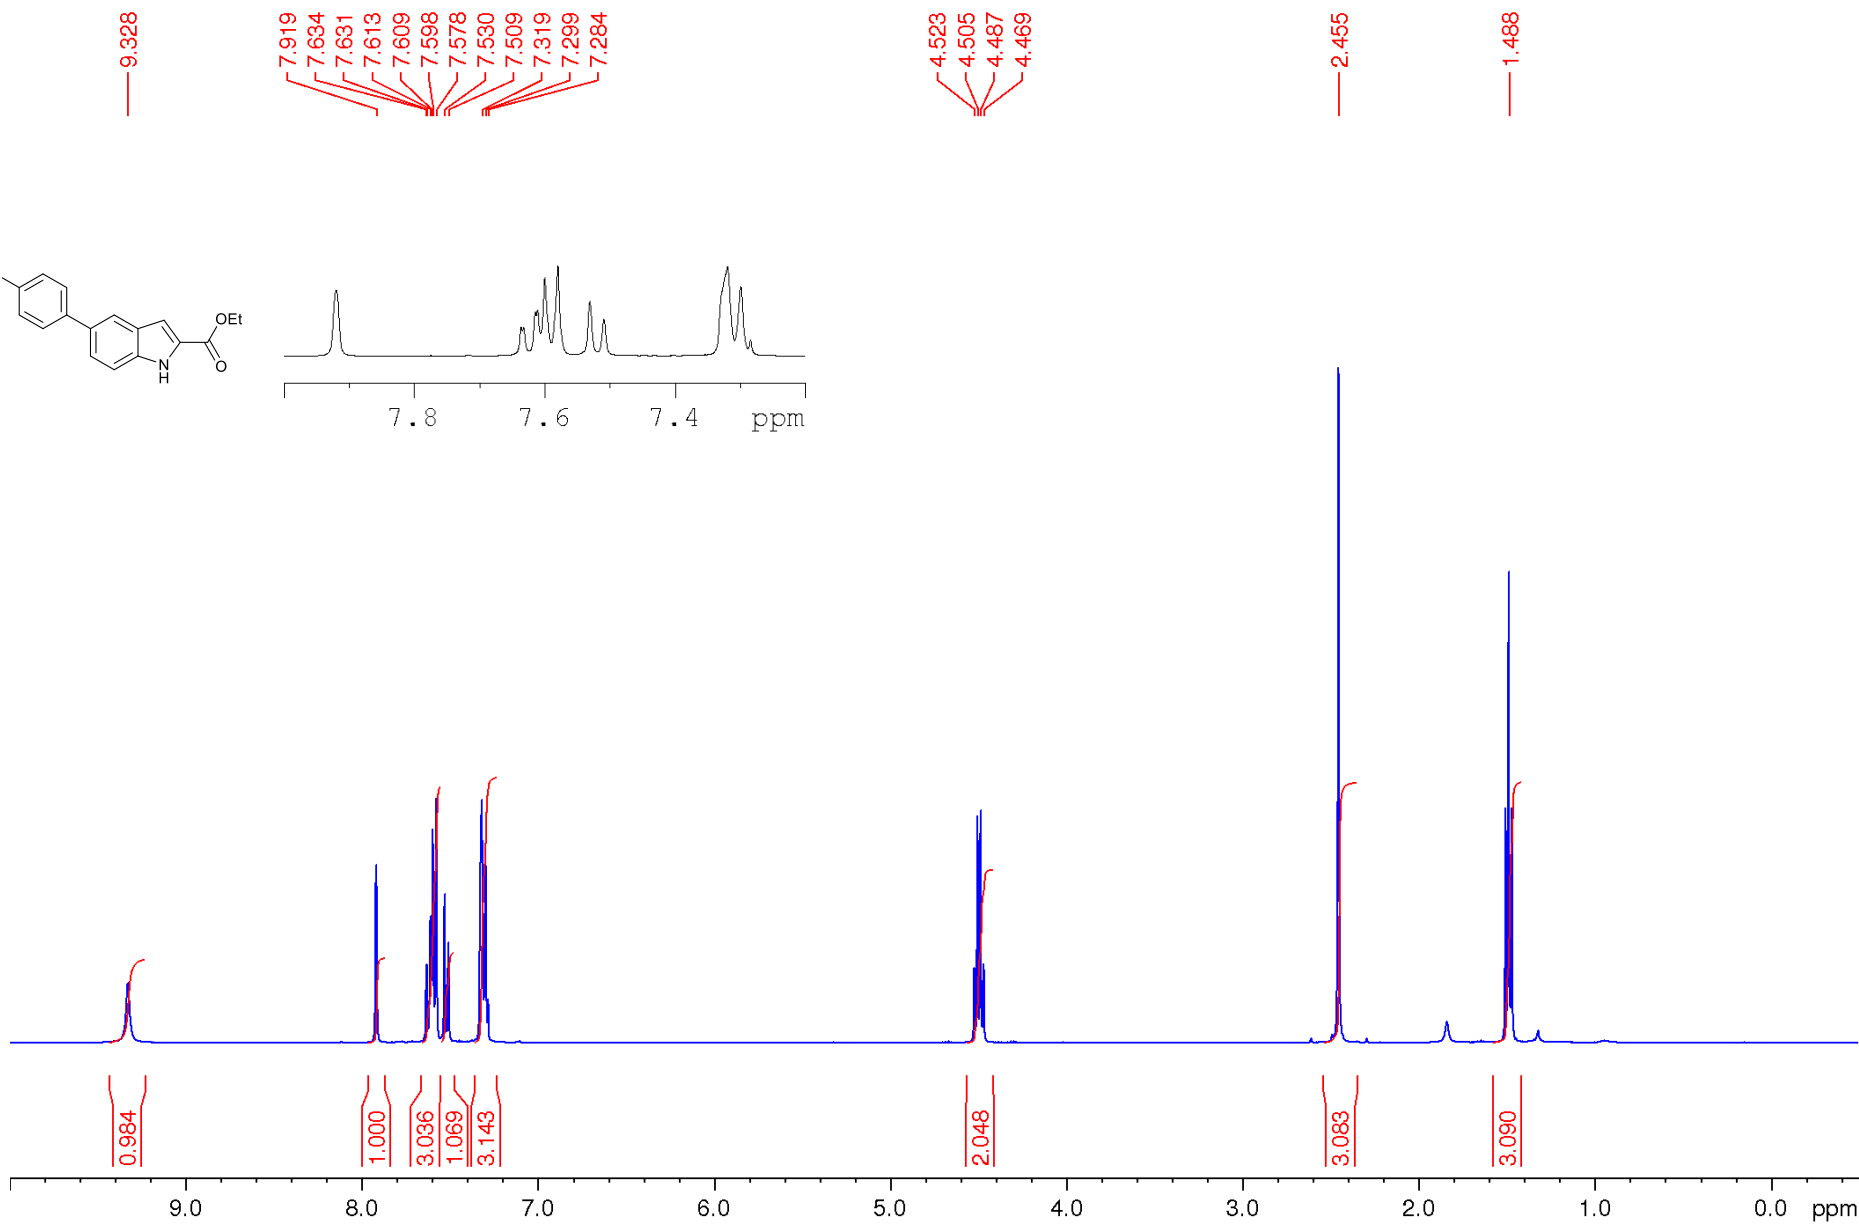

$^{13}\text{C}$  NMR-spectrum (100 MHz,  $\text{CDCl}_3$ )

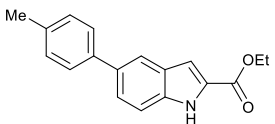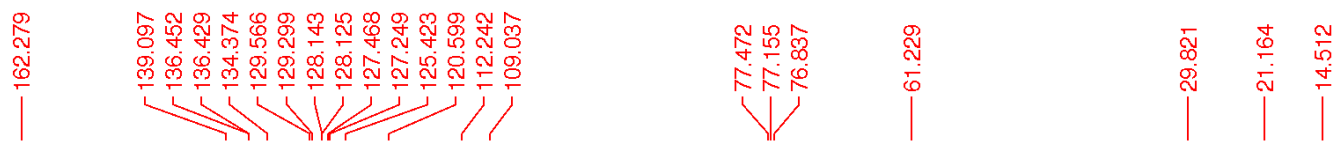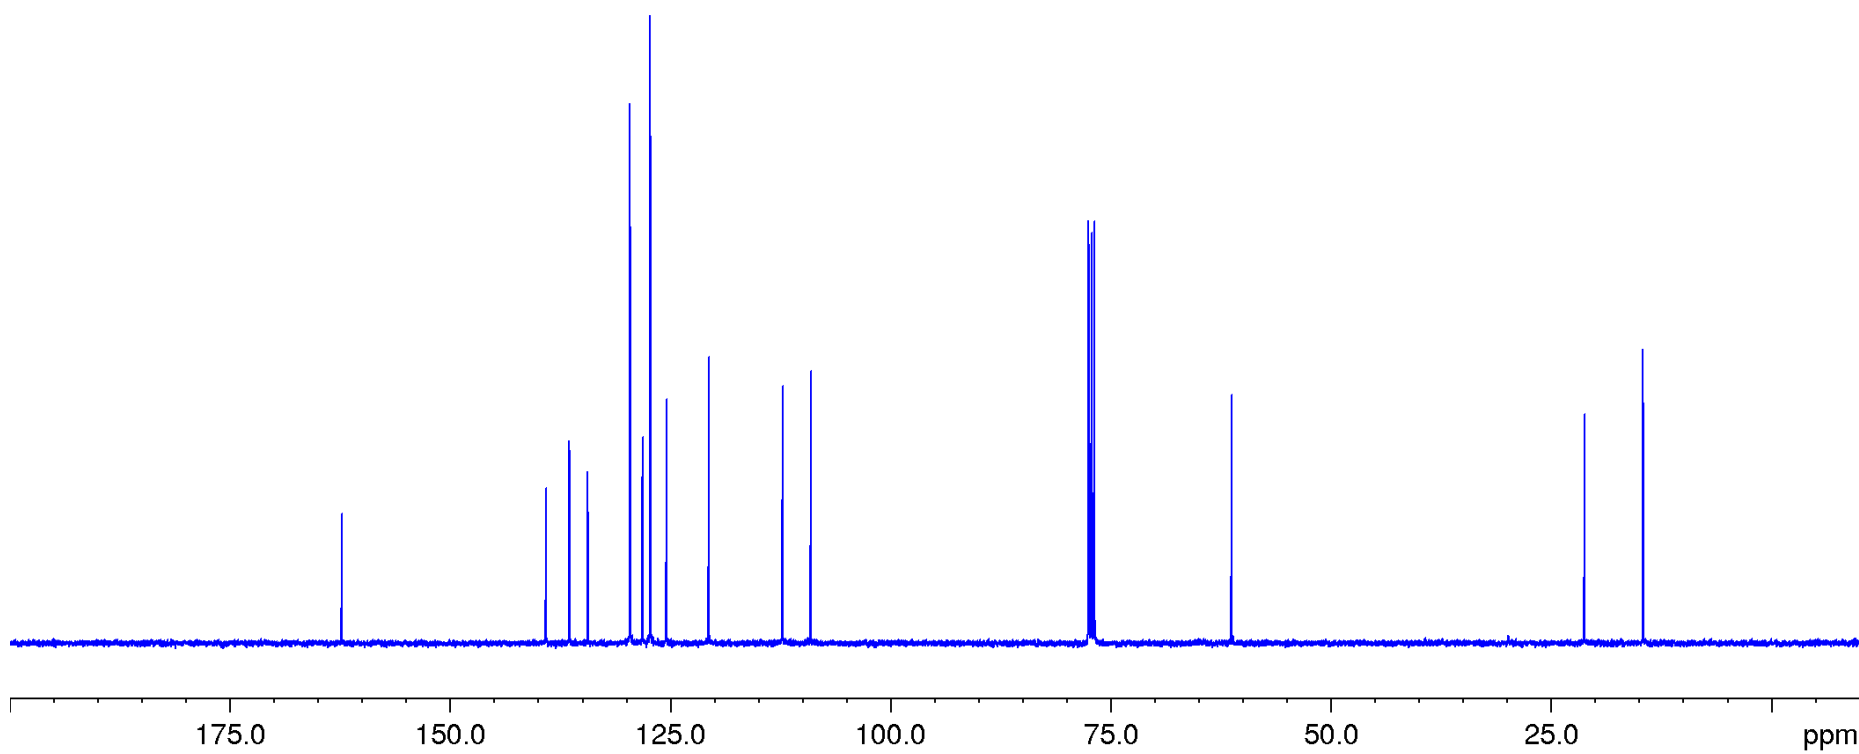



# DEPT 135 NMR-spectrum (CDCl<sub>3</sub>)

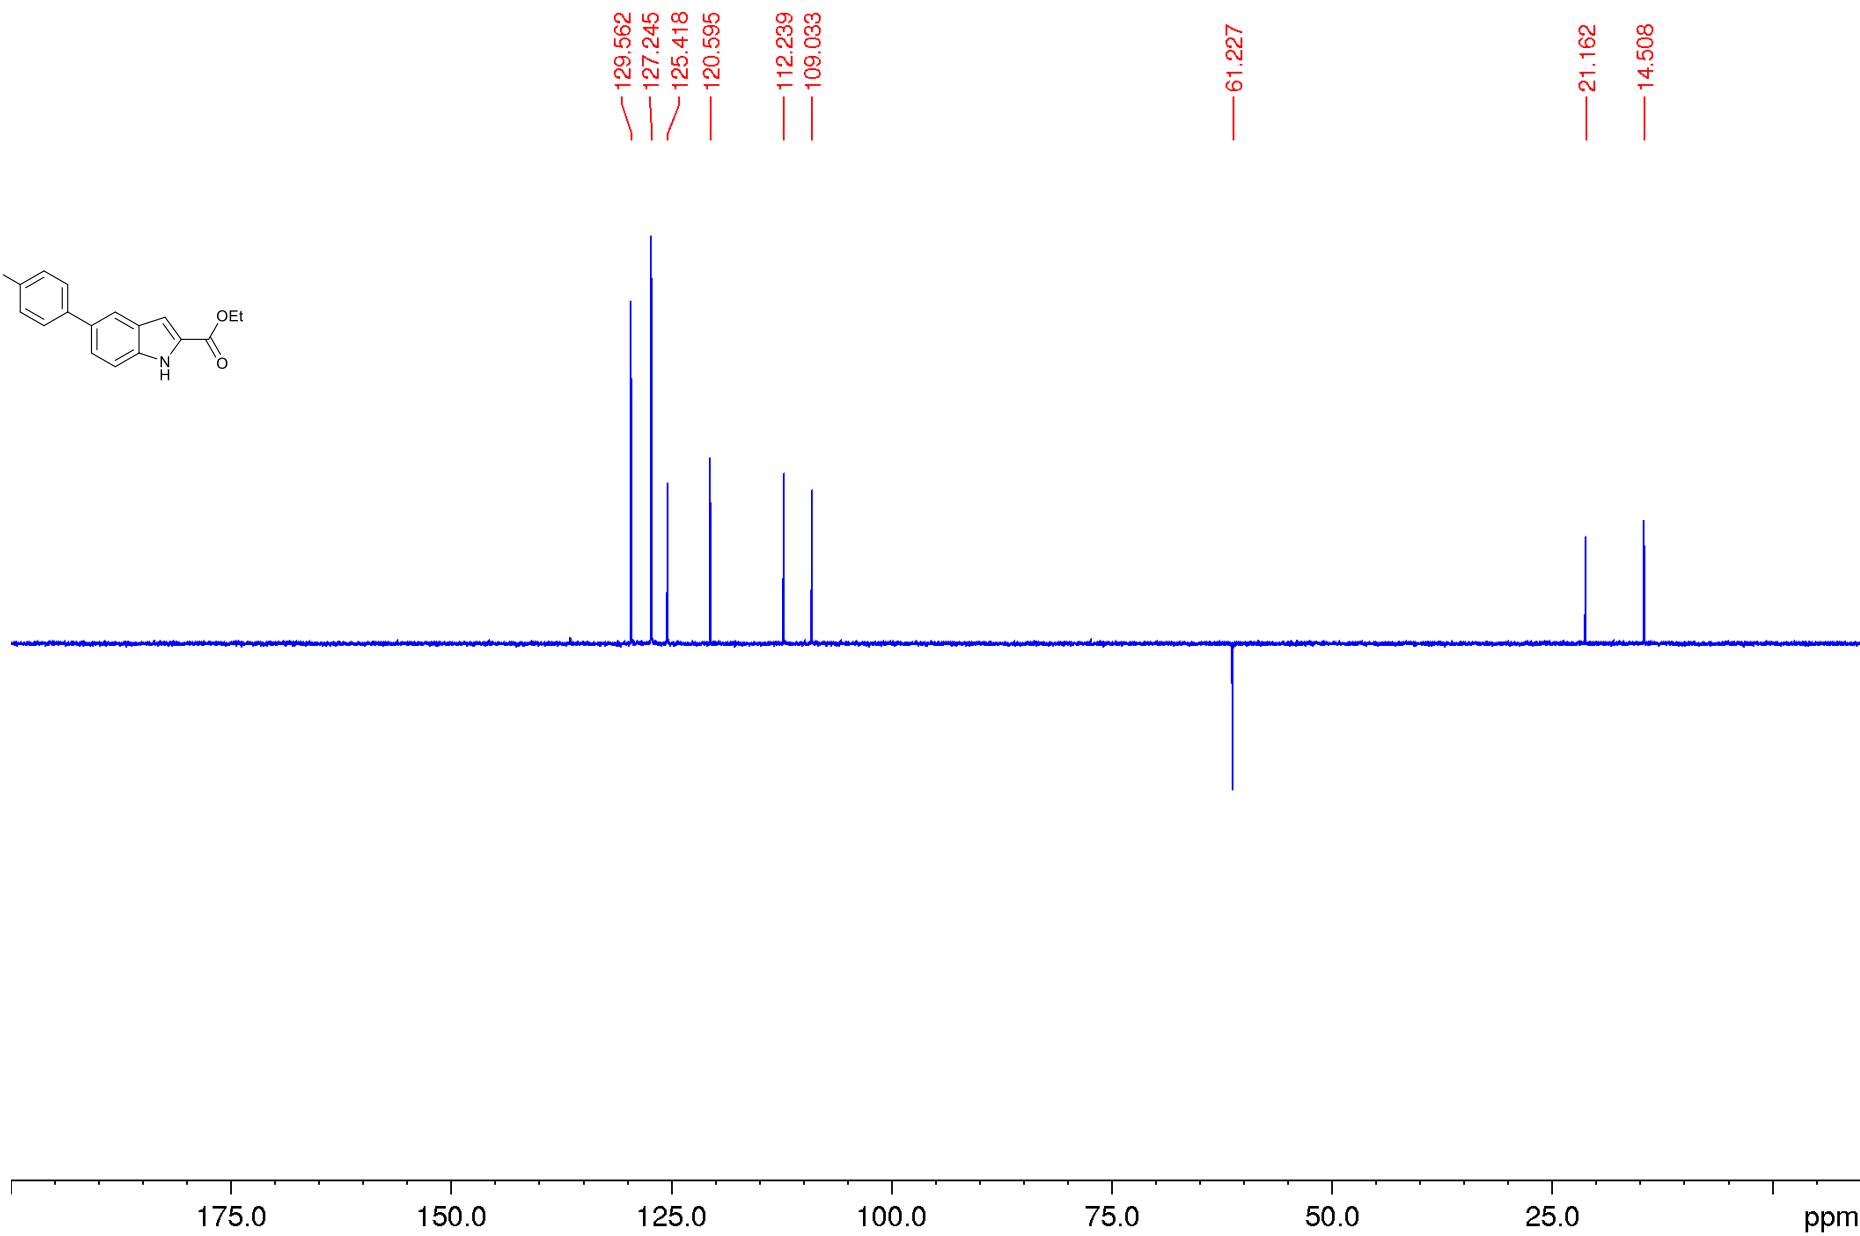

# $^1\text{H}$ NMR-spectrum (400 MHz, $\text{DMSO-}d_6$ )

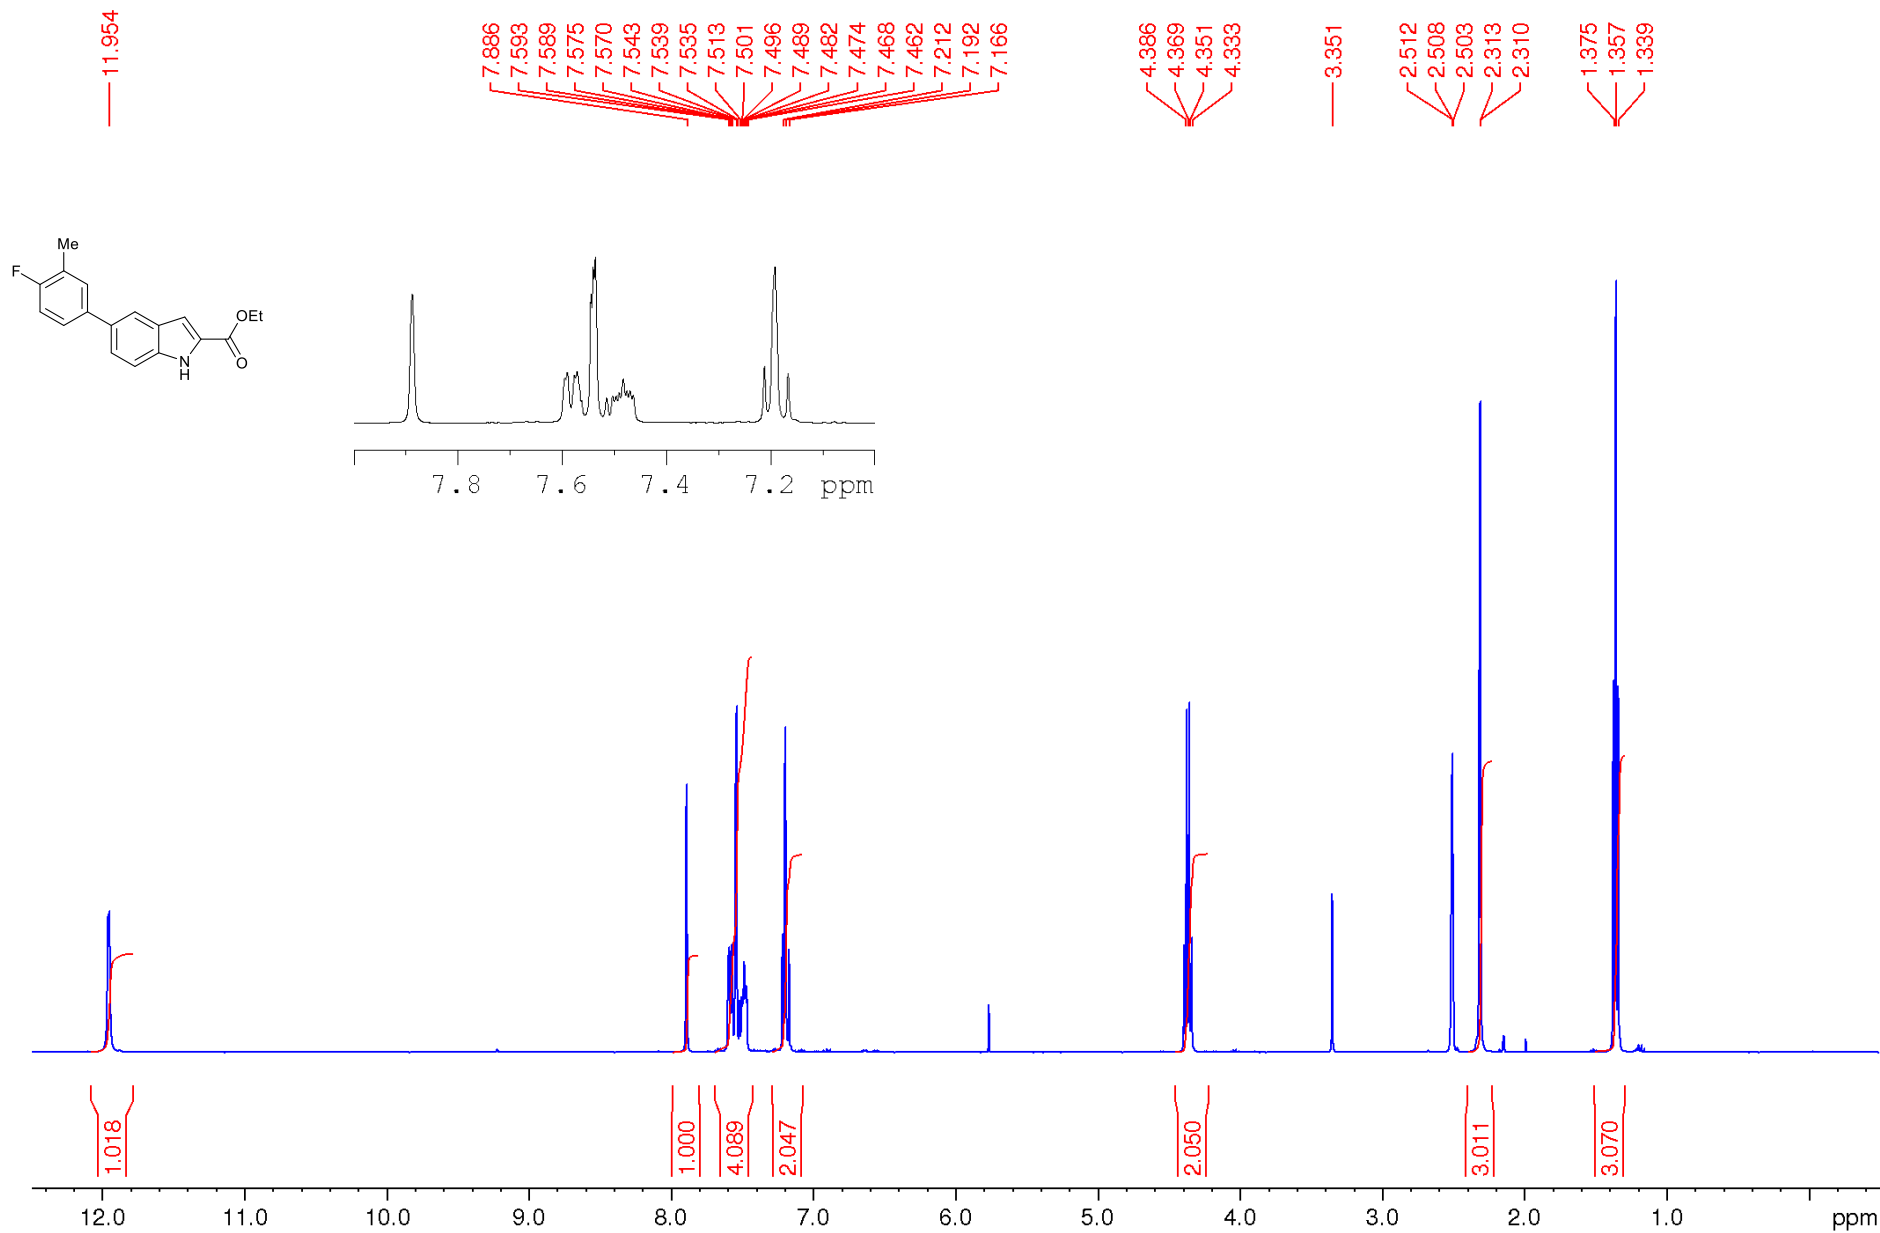

$^{13}\text{C}$  NMR-spectrum (100 MHz,  $\text{DMSO}-d_6$ )

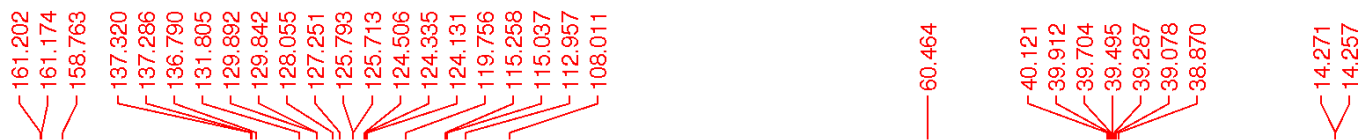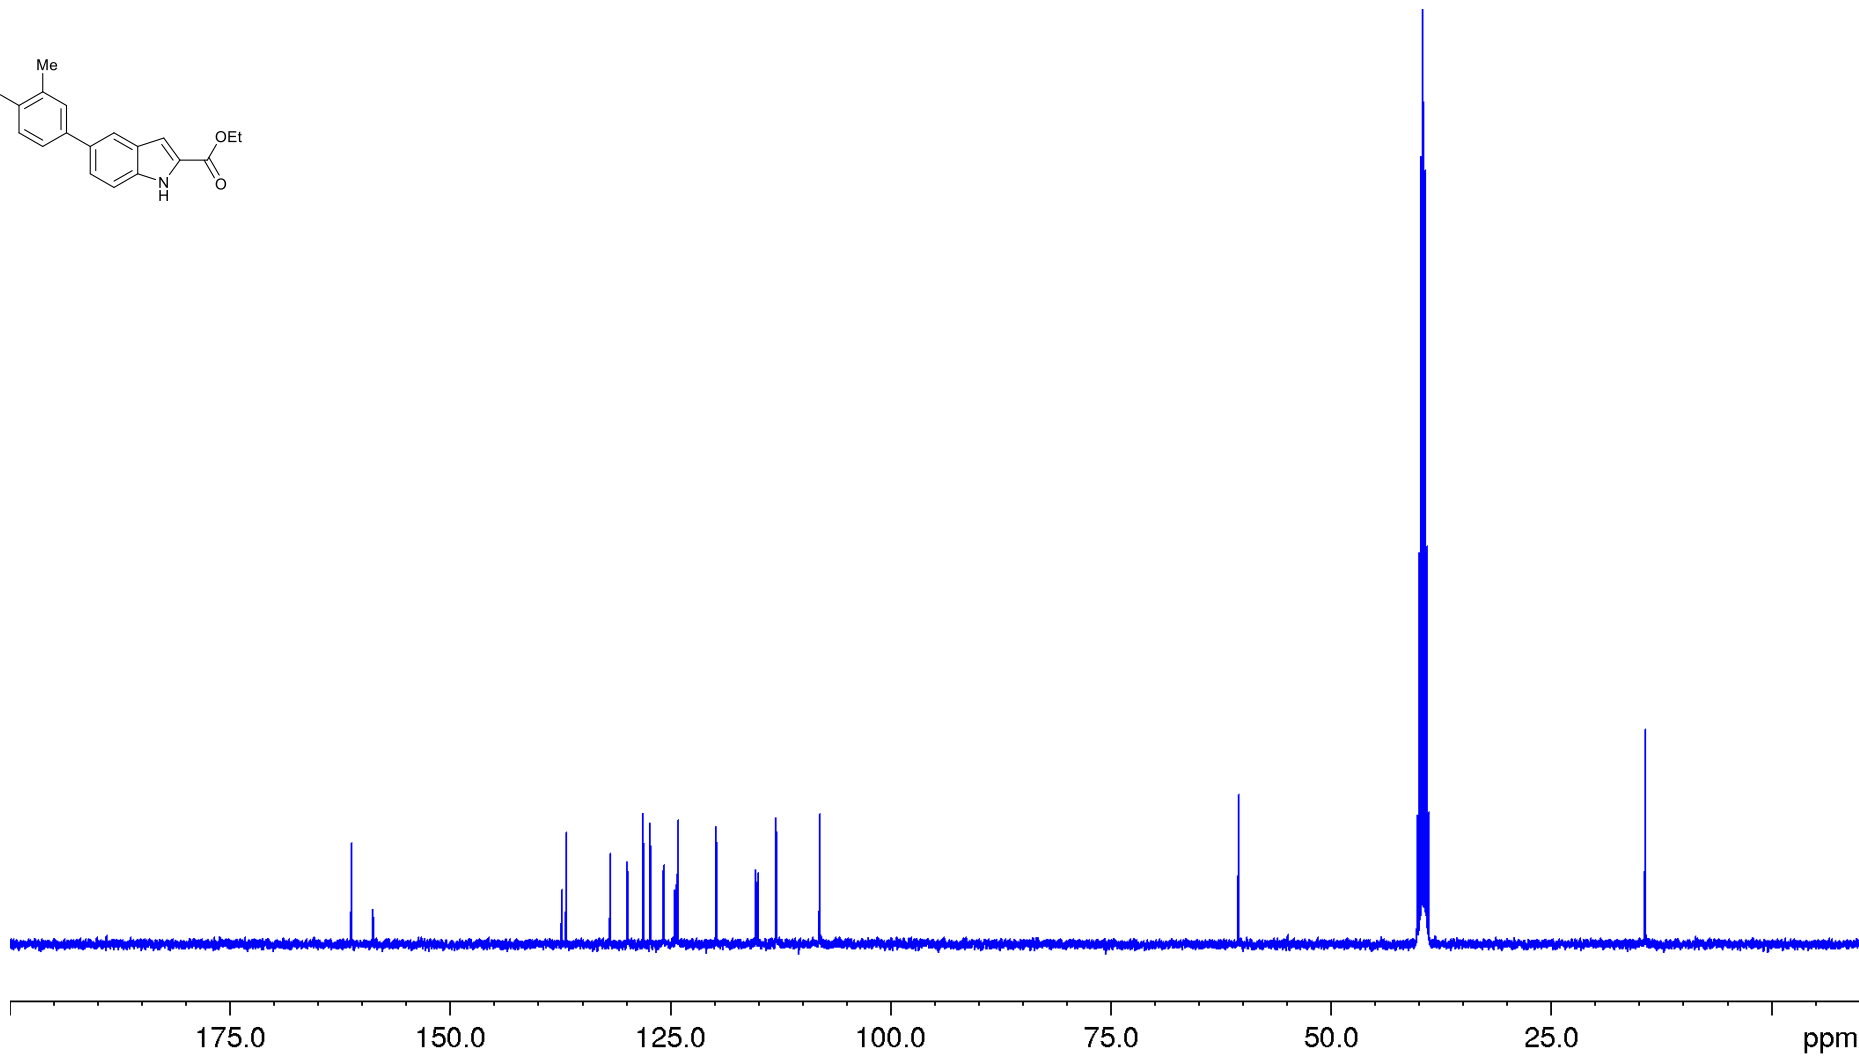

# DEPT 135 NMR-spectrum (DMSO- $d_6$ )

129.625  
129.575  
125.527  
125.447  
123.865  
119.491  
114.991  
114.771  
112.691  
107.745

60.198

39.697  
39.484  
39.275

14.007  
13.989

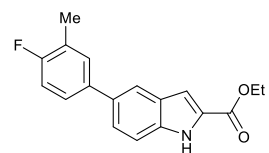

175.0

150.0

125.0

100.0

75.0

50.0

25.0

ppm

$^{19}\text{F}$  NMR-spectrum (376.5,  $\text{DMSO-}d_6$ )

-121.022  
-121.029  
-121.037  
-121.045  
-121.054  
-121.061  
-121.069  
-121.079  
-121.086

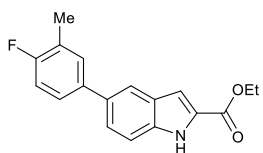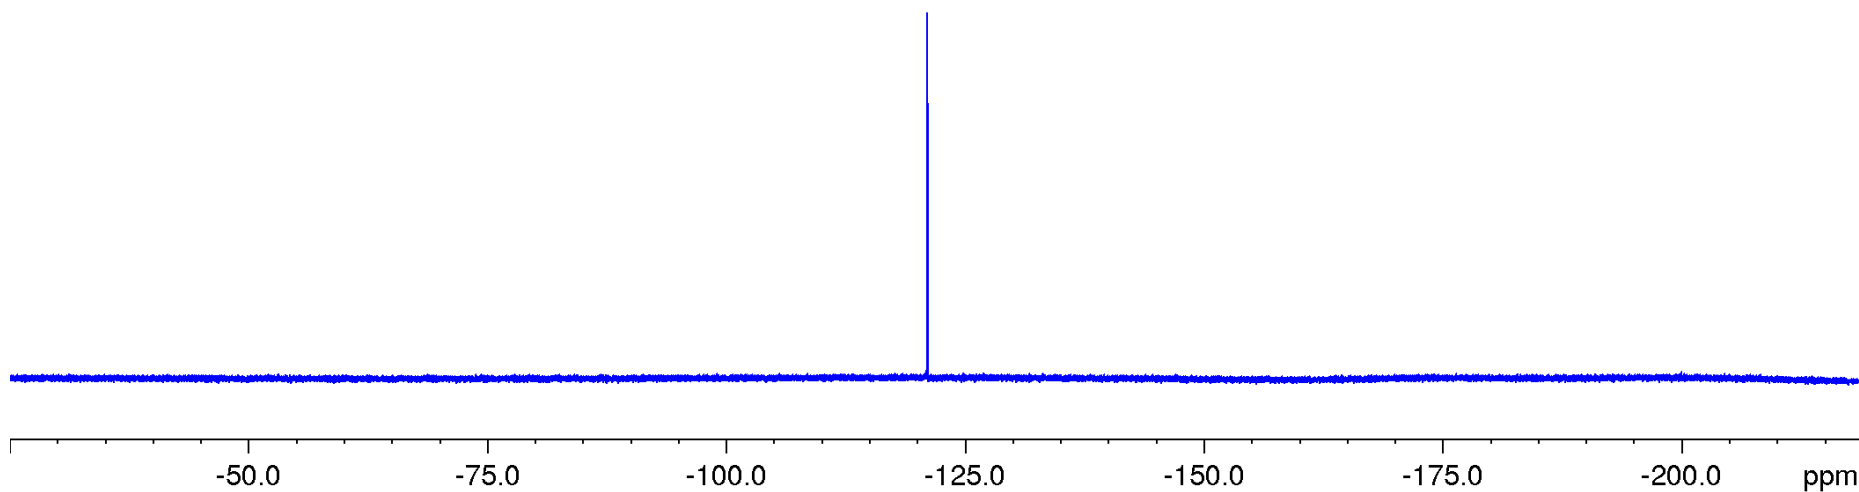

# $^1\text{H}$ NMR-spectrum (400 MHz, $\text{DMSO-}d_6$ )

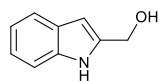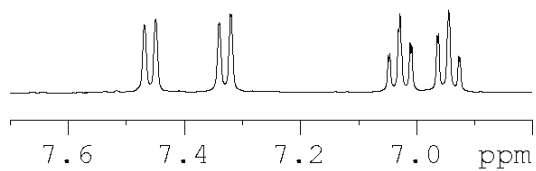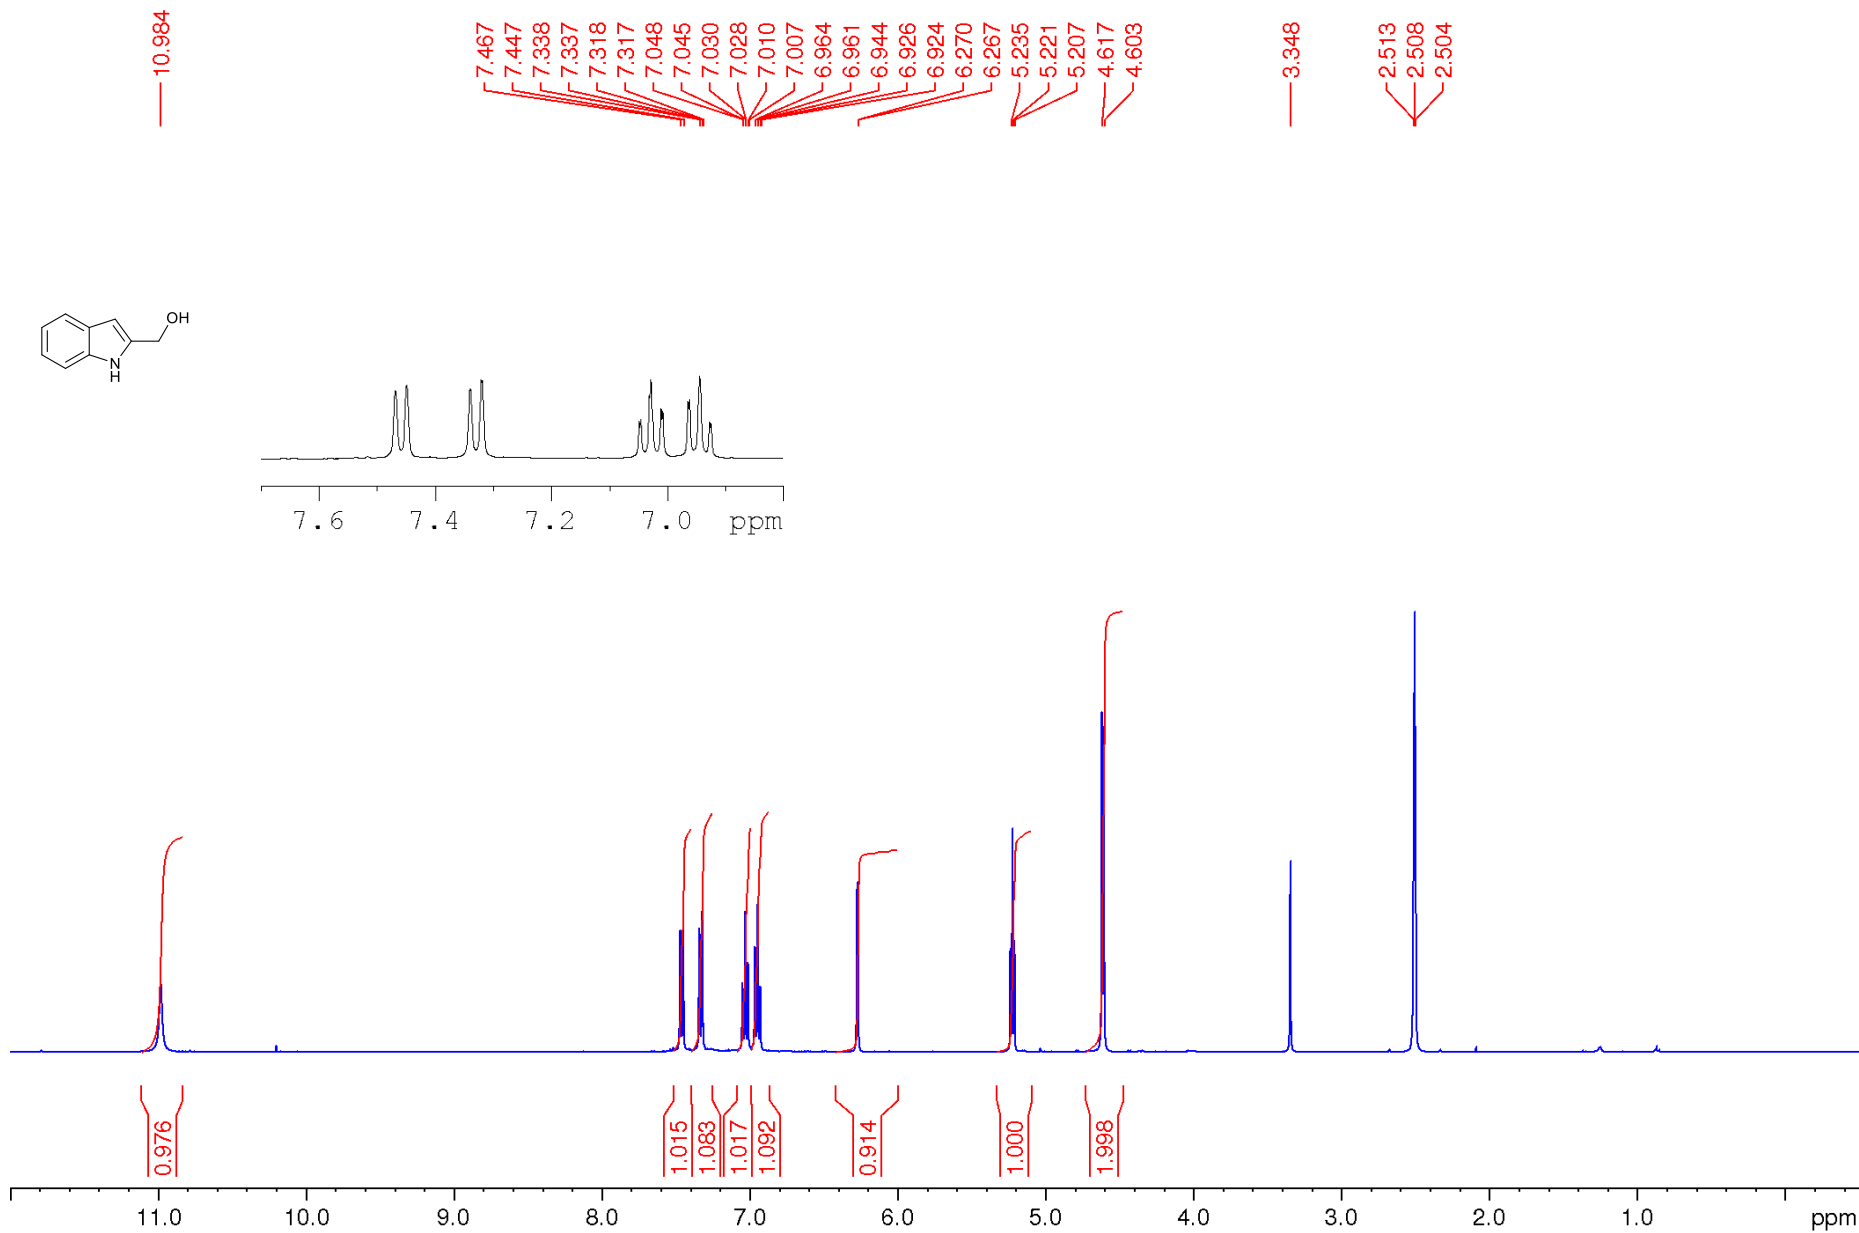

$^{13}\text{C}$  NMR-spectrum (100 MHz,  $\text{DMSO}-d_6$ )

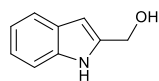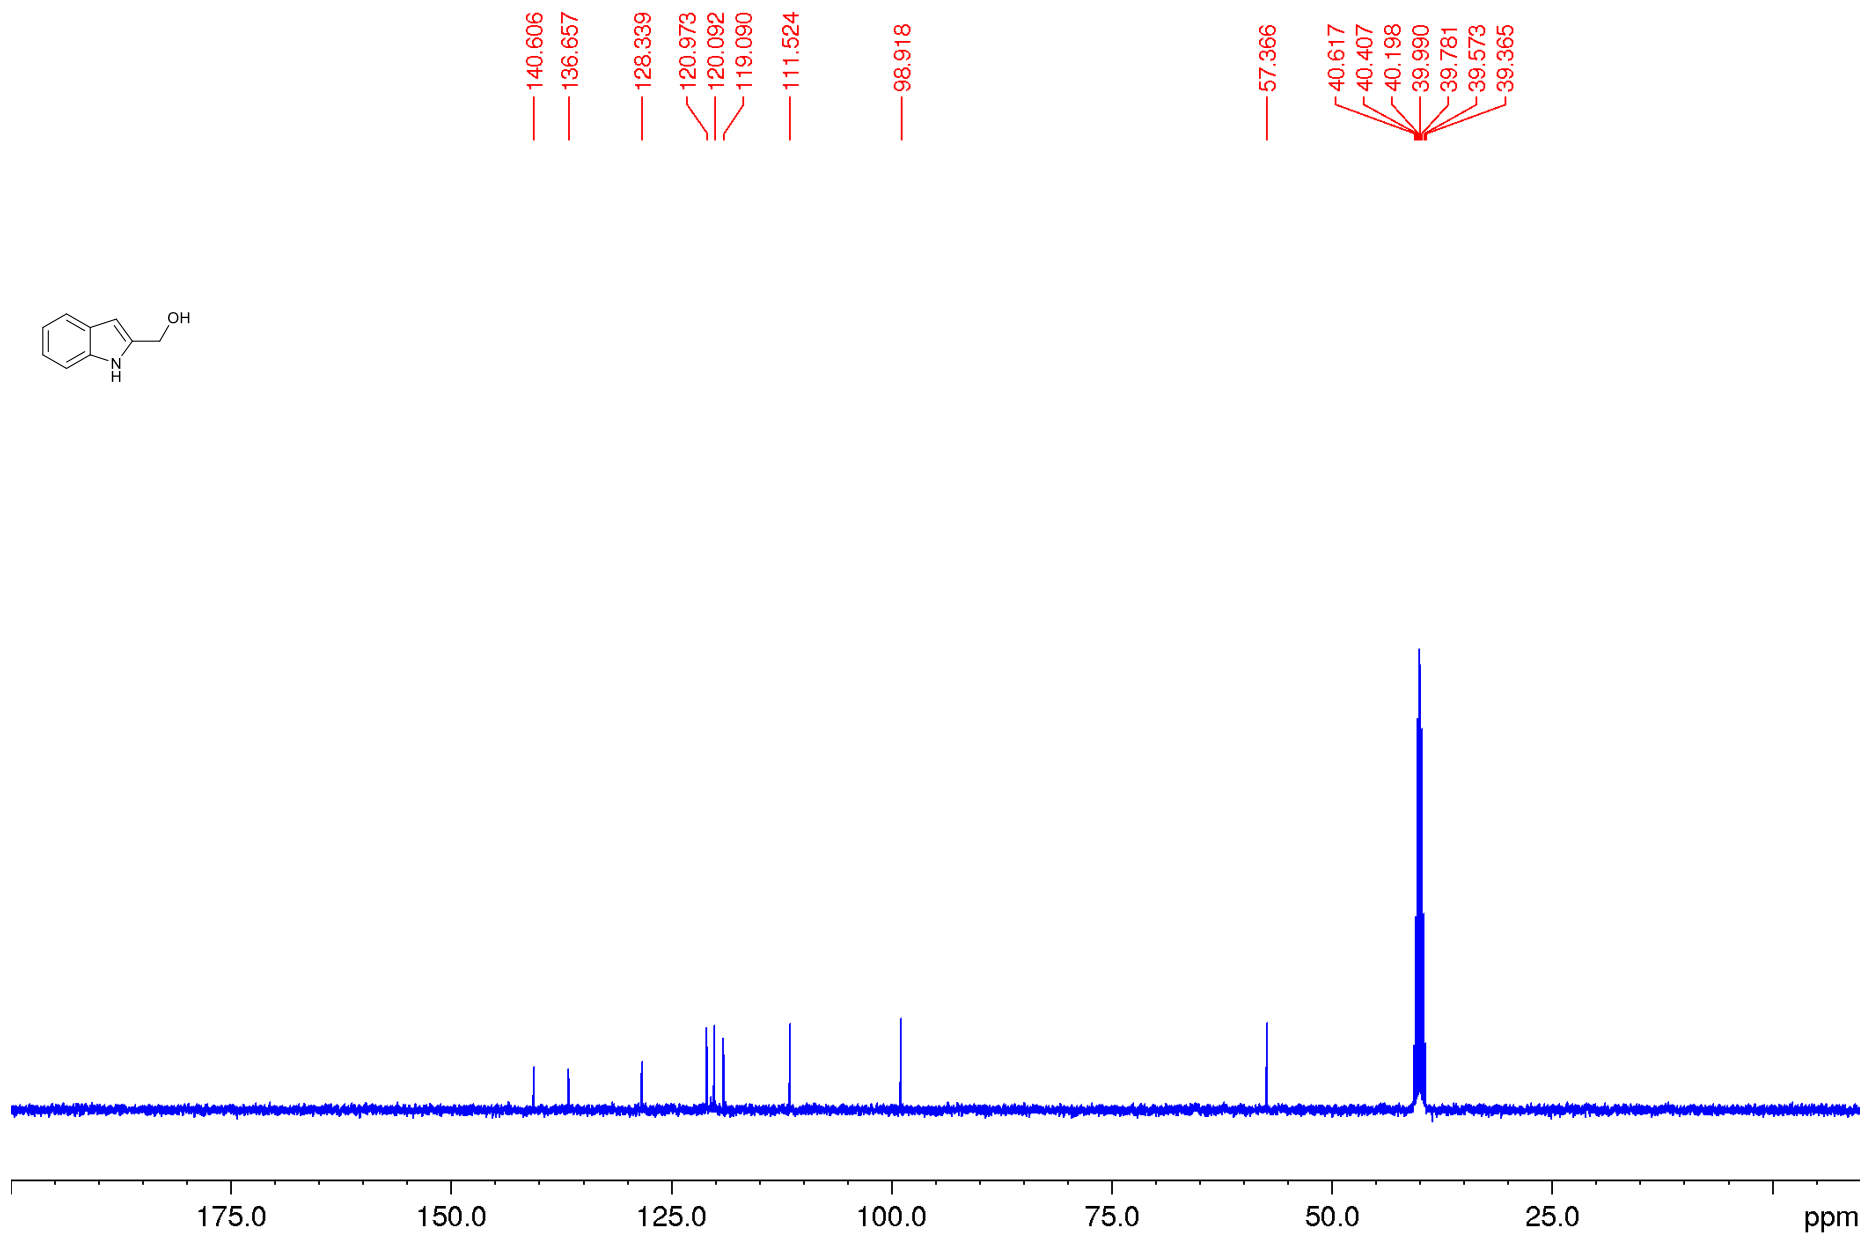

# DEPT 135 NMR-spectrum (DMSO- $d_6$ )

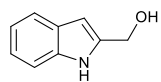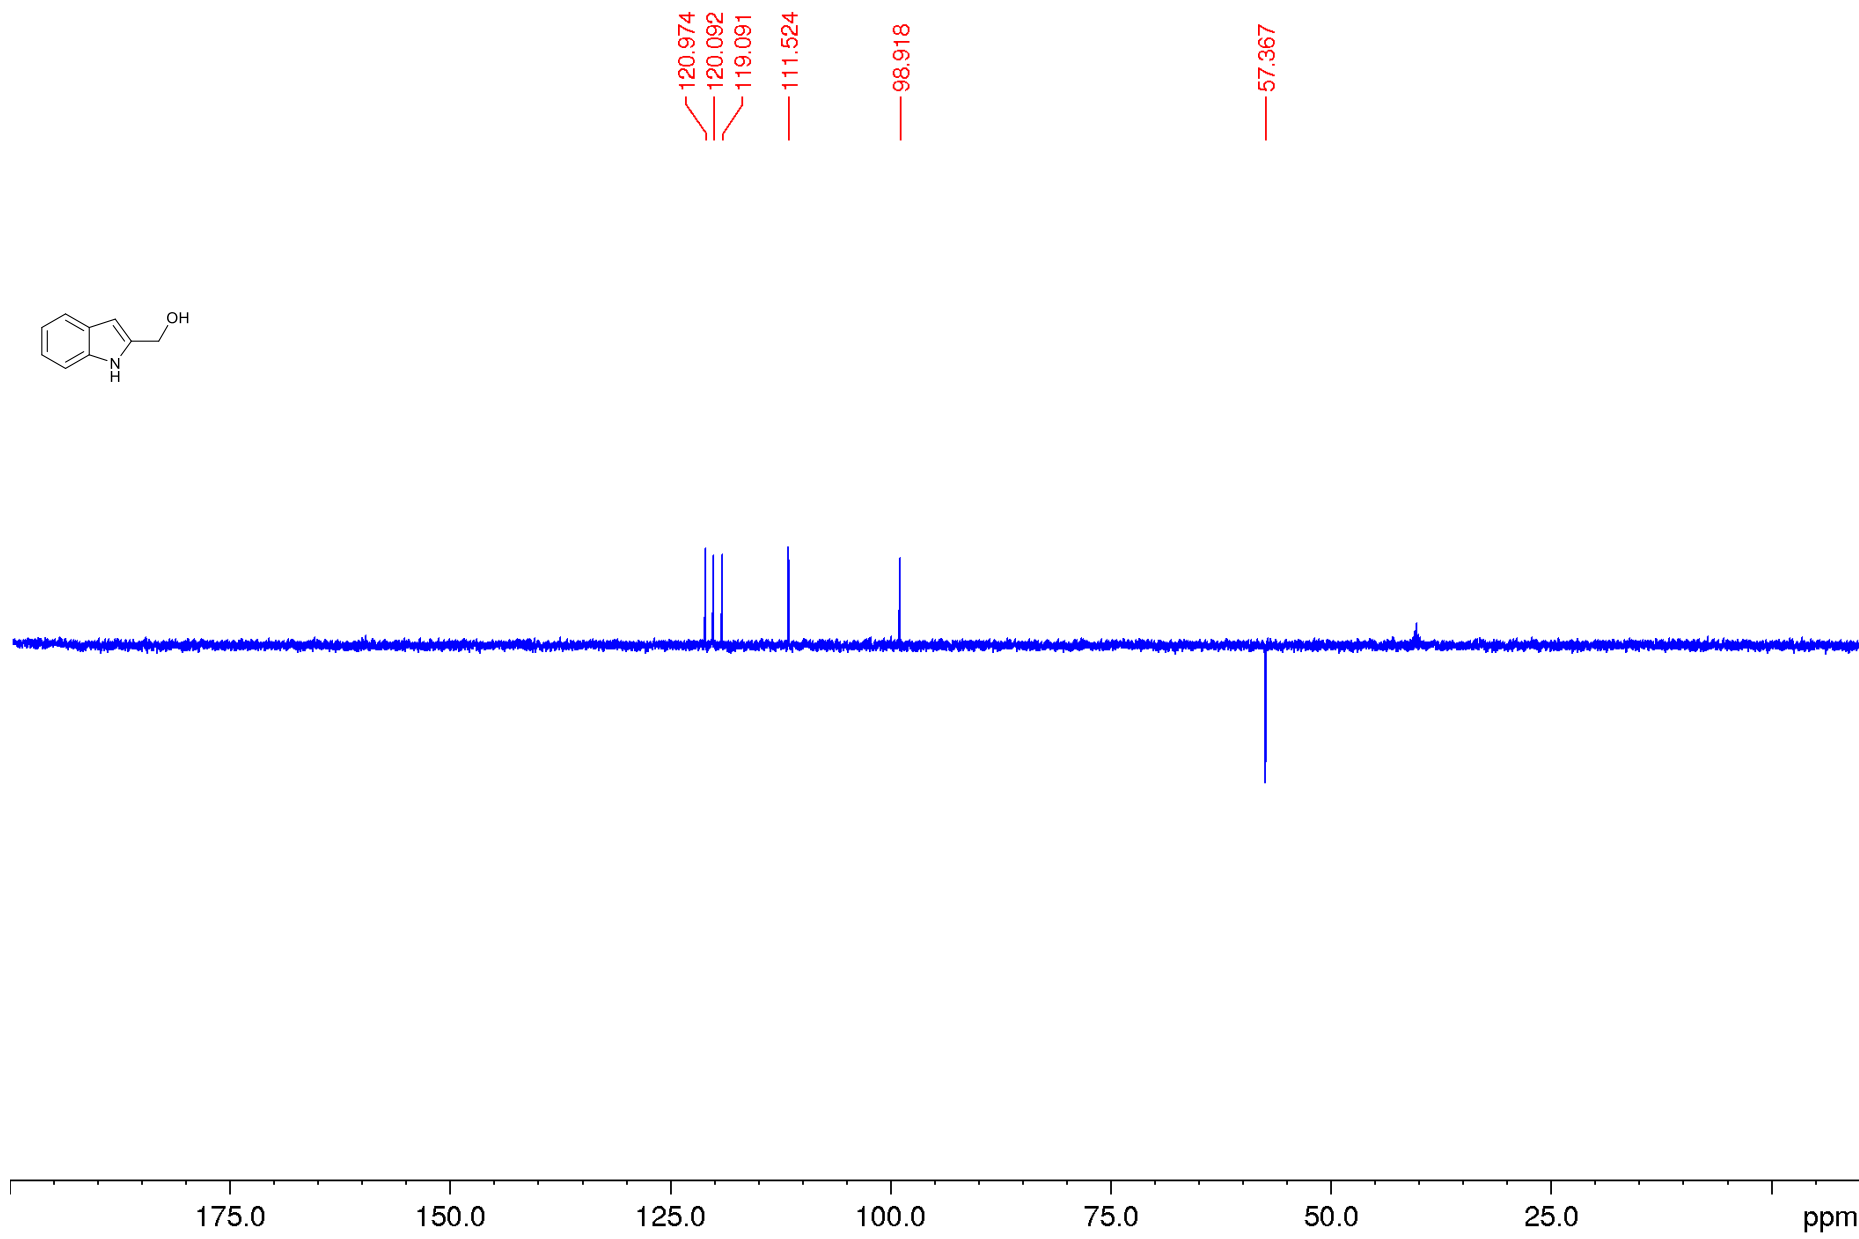



<sup>1</sup>H NMR-spectrum (400 MHz, CDCl<sub>3</sub>)

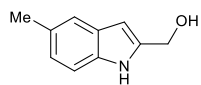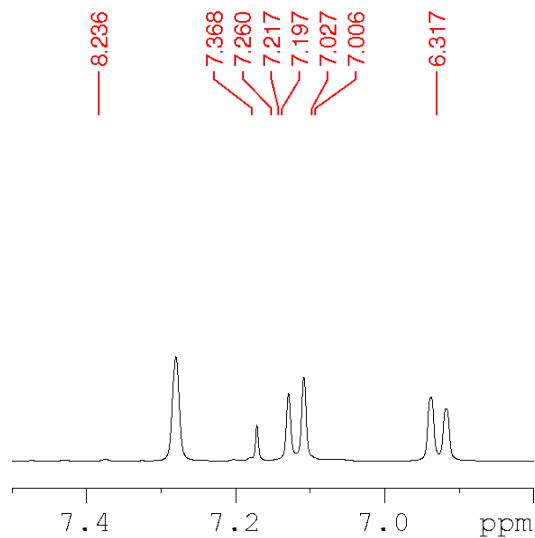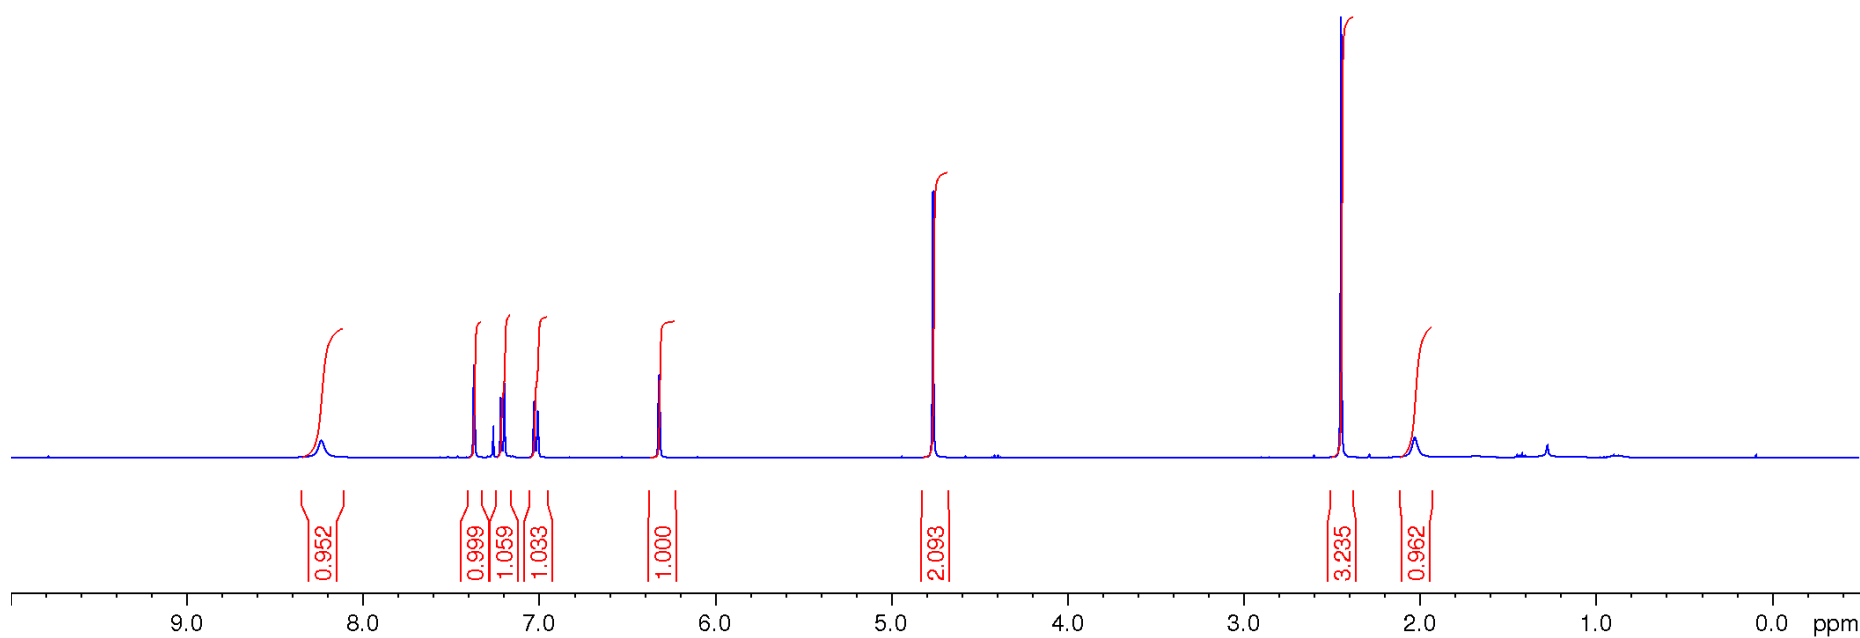

$^{13}\text{C}$  NMR-spectrum (100 MHz,  $\text{CDCl}_3$ )

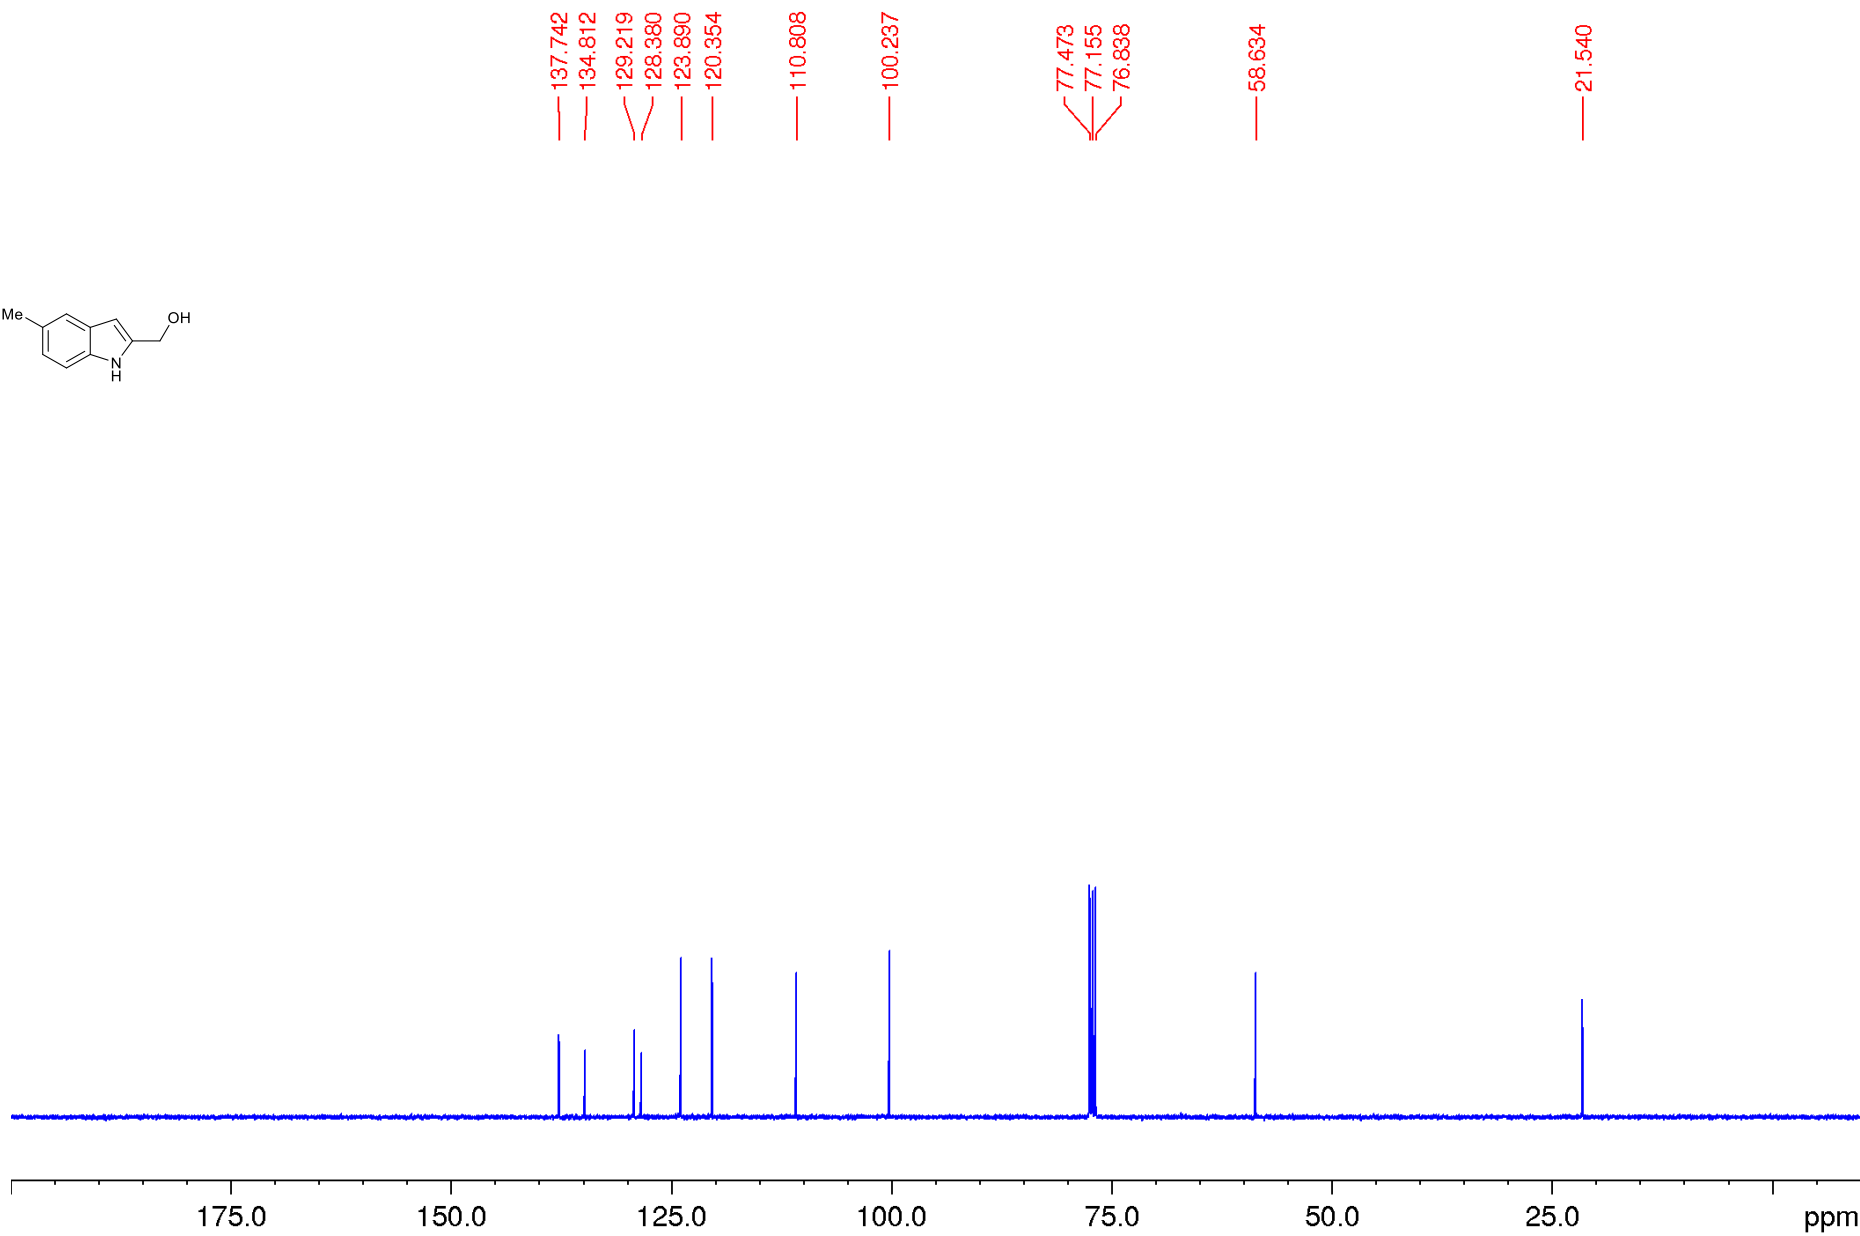

# DEPT 135 NMR-spectrum (CDCl<sub>3</sub>)

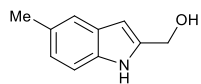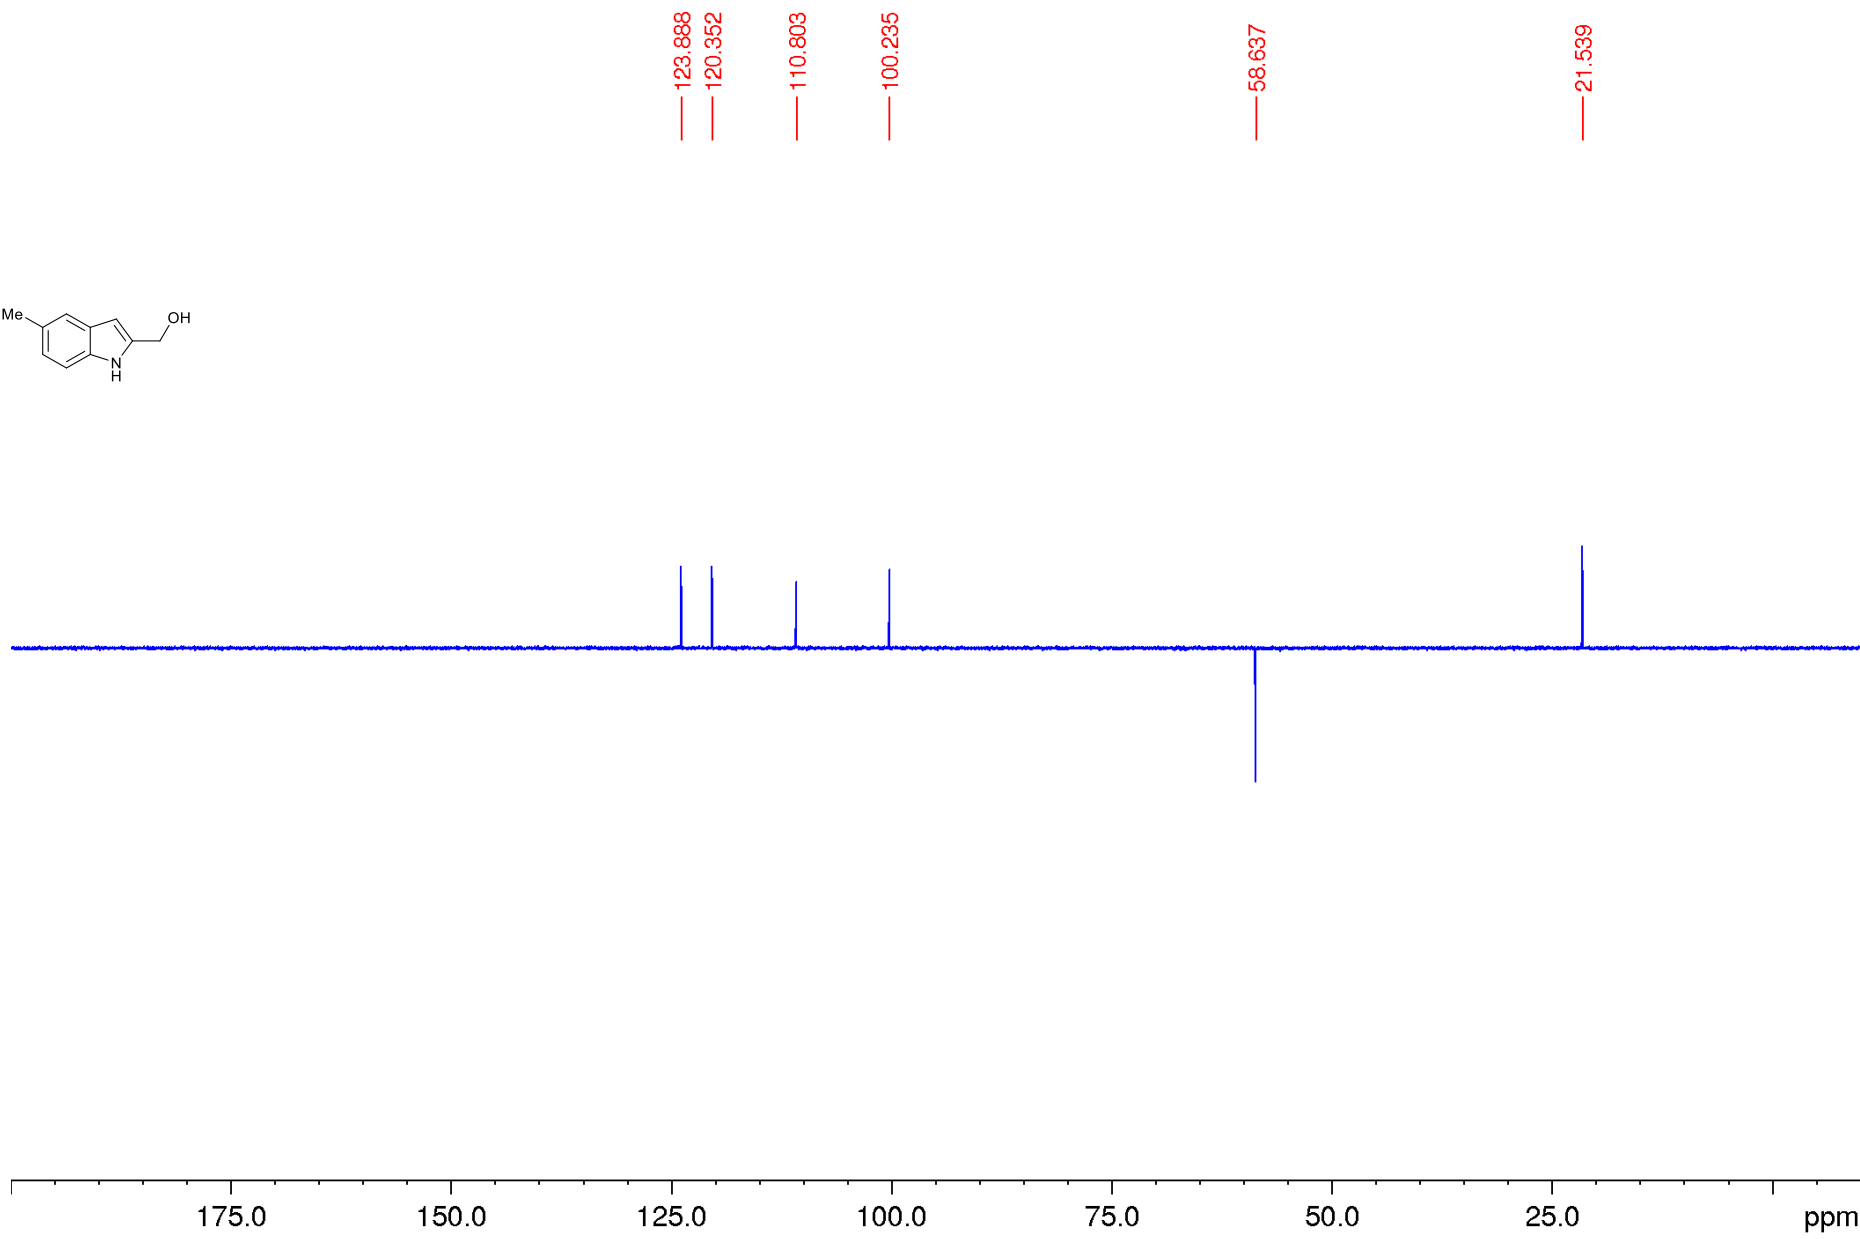

# $^1\text{H}$ NMR-spectrum (400 MHz, DMSO- $d_6$ )

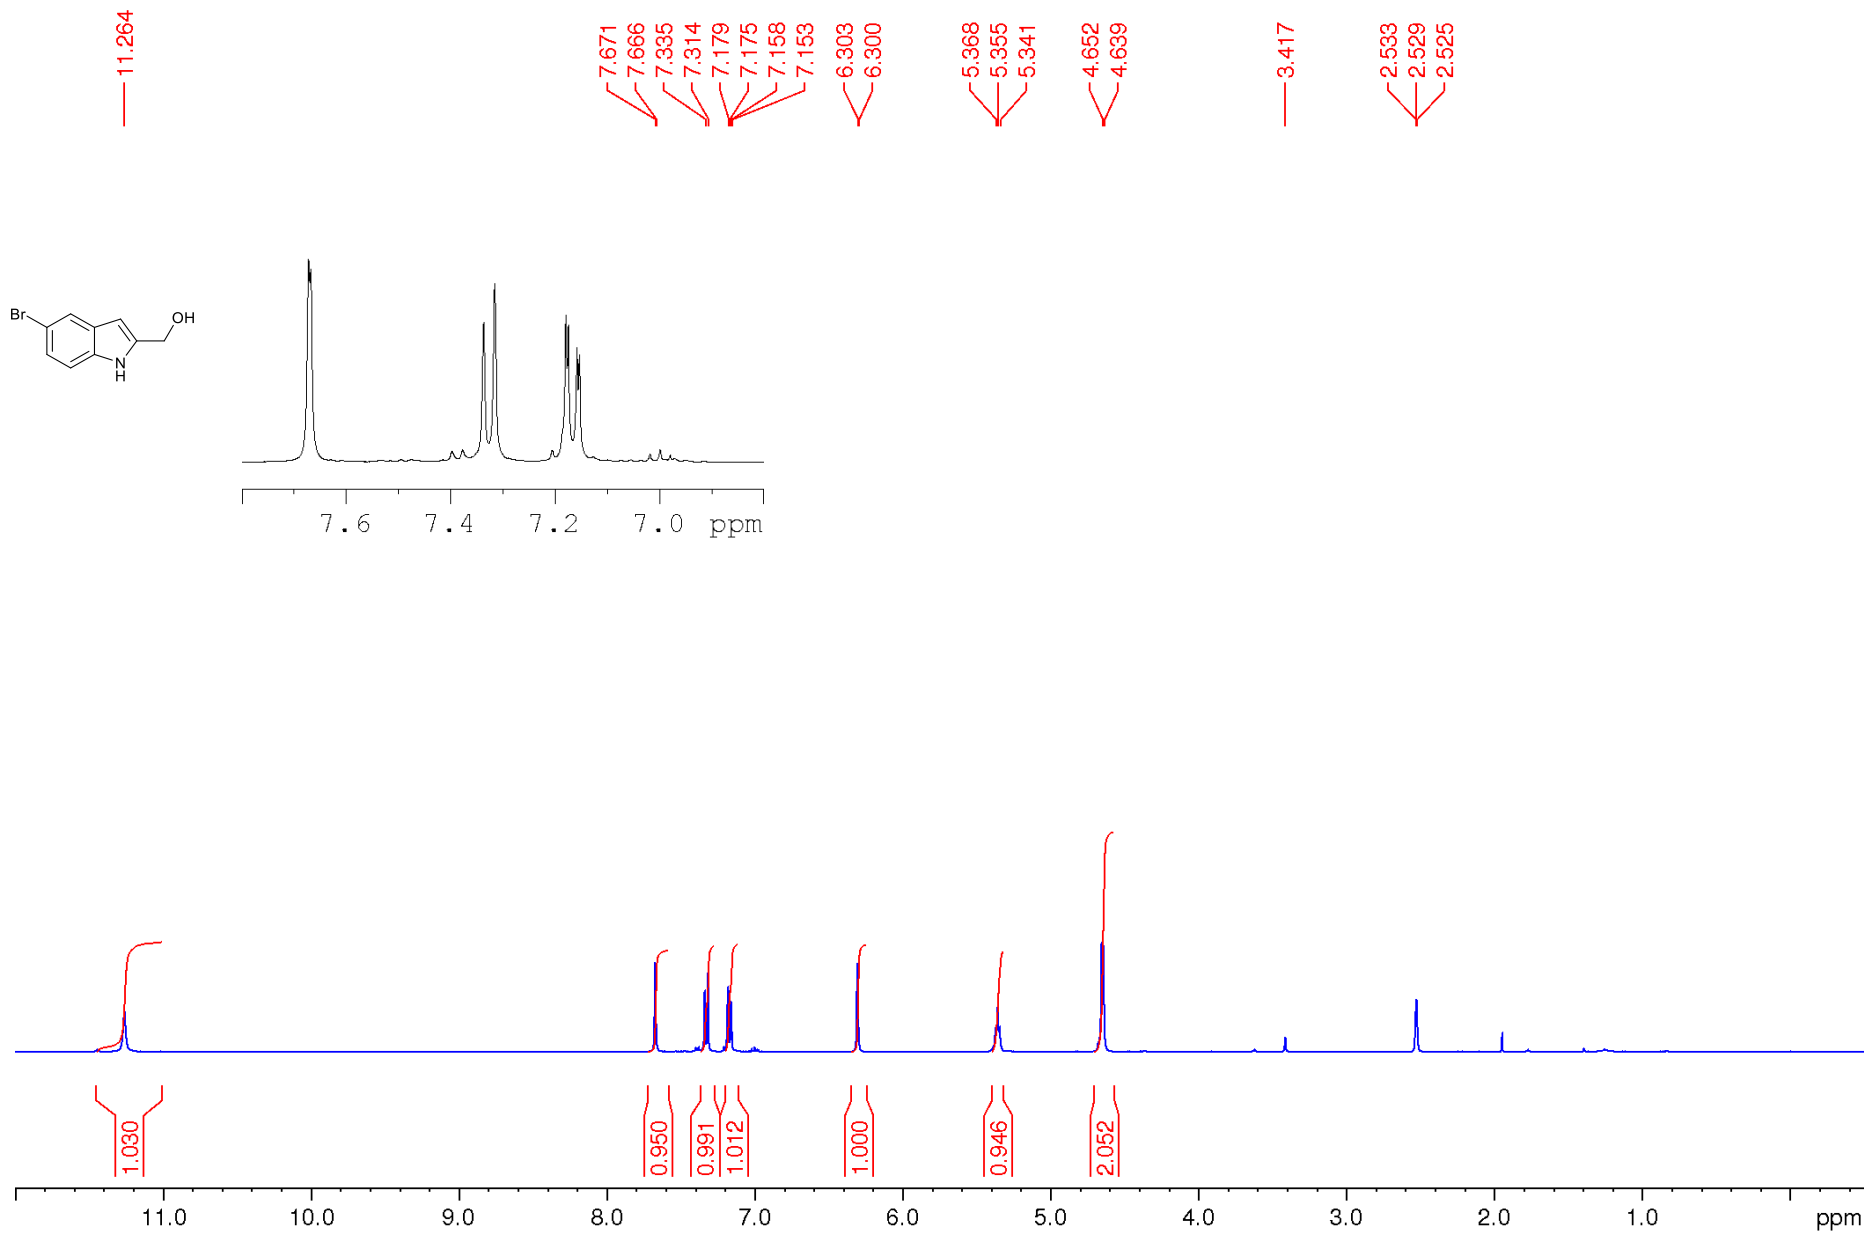

$^{13}\text{C}$  NMR-spectrum (100 MHz,  $\text{DMSO-}d_6$ )

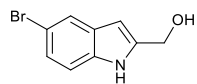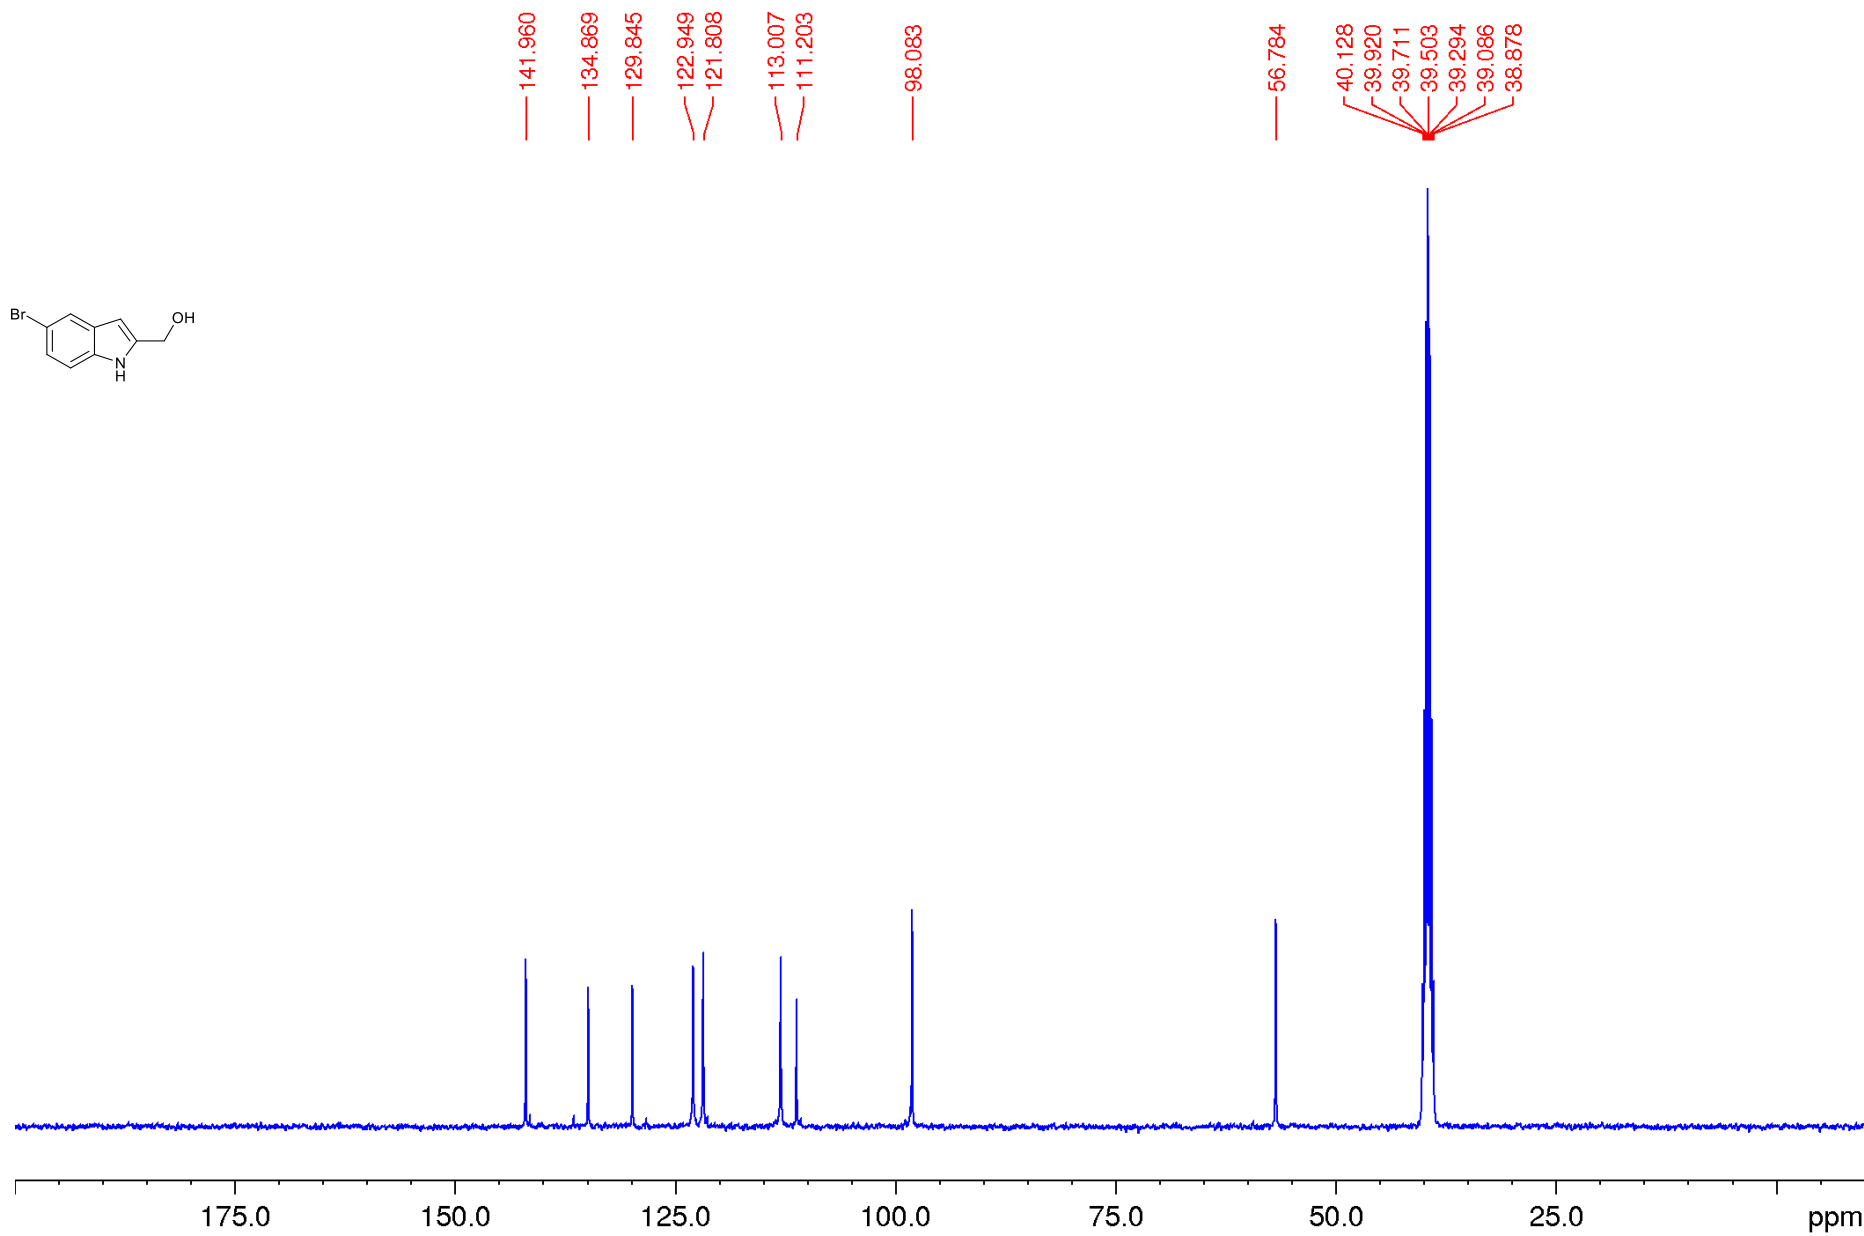

# DEPT 135 NMR-spectrum (DMSO- $d_6$ )

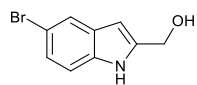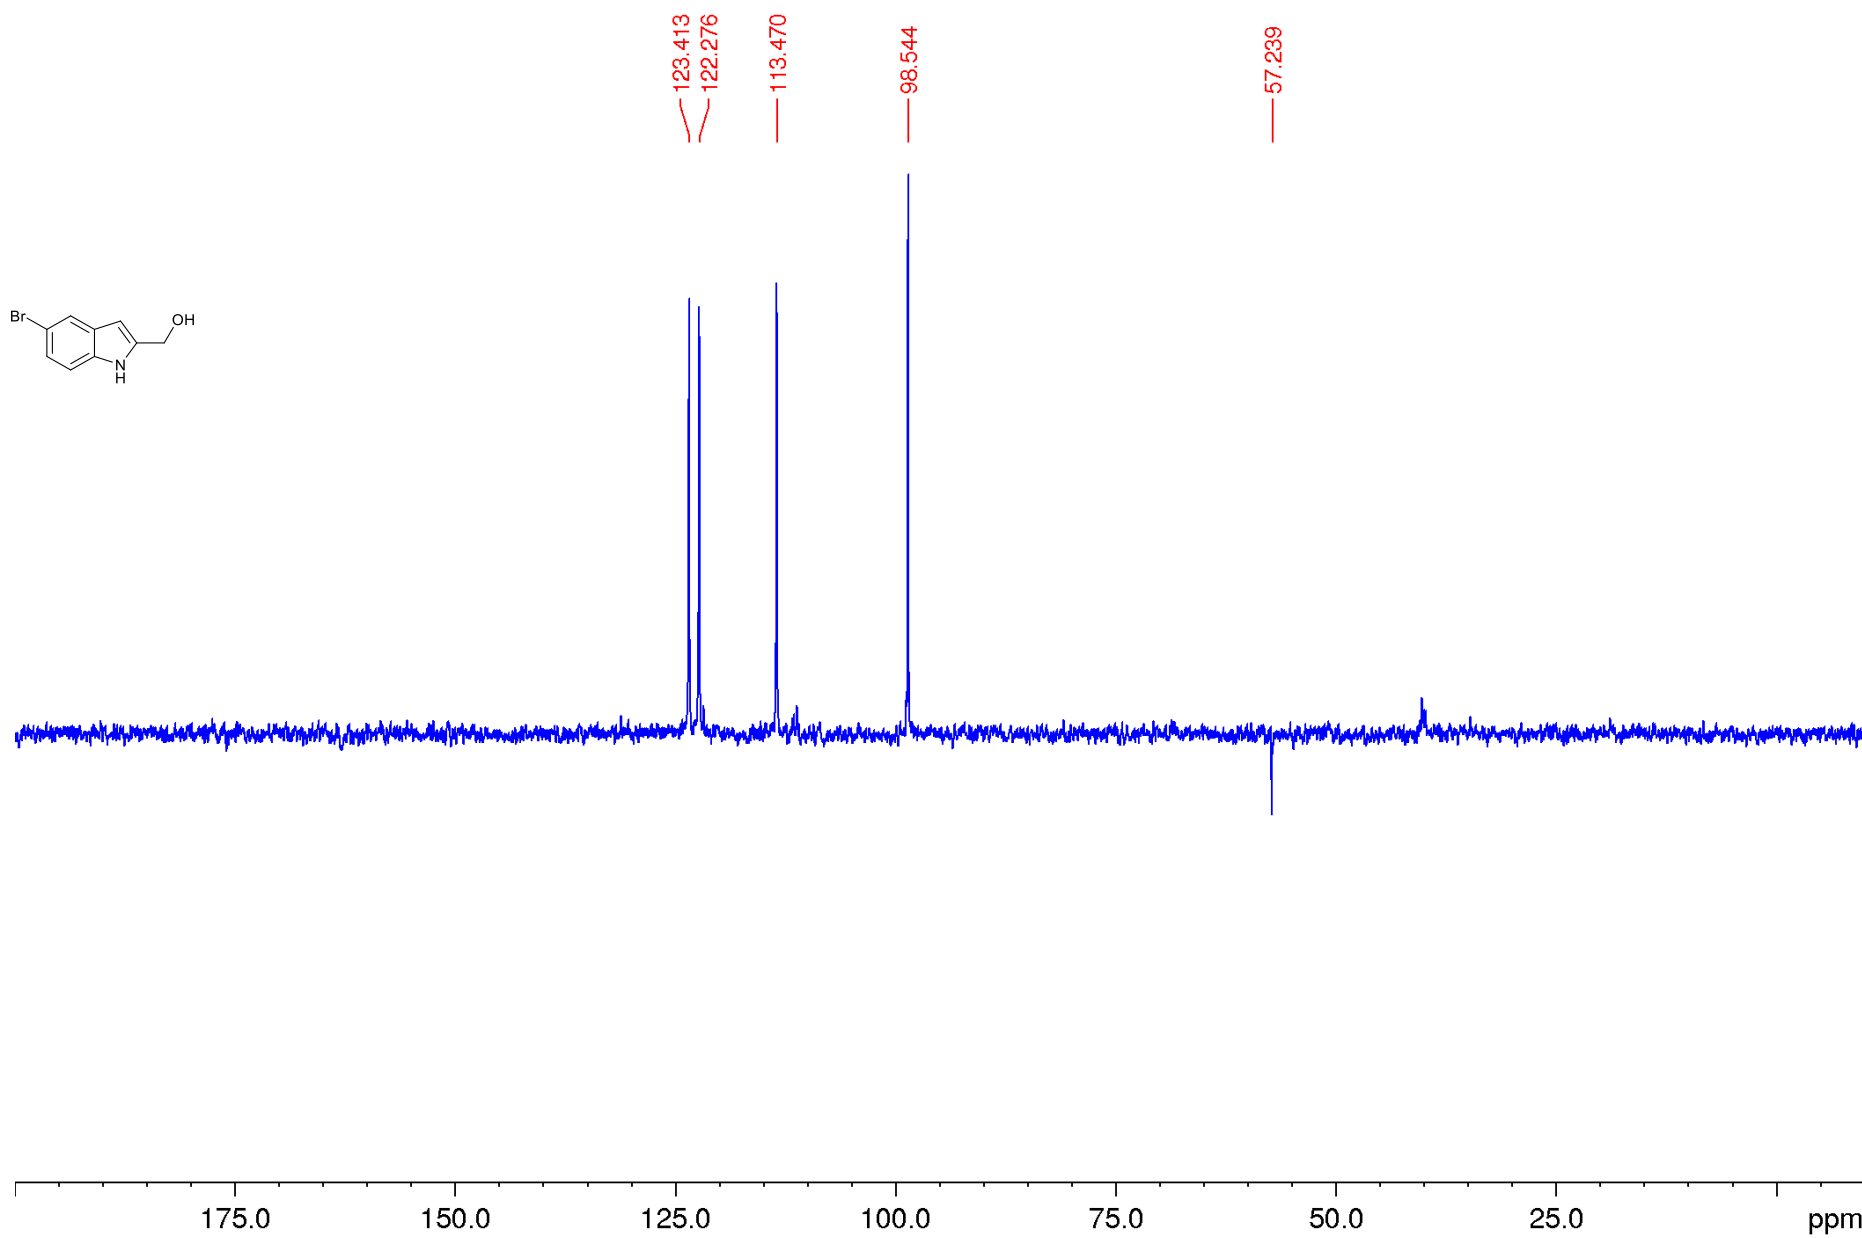

# $^1\text{H}$ NMR-spectrum (400 MHz, $\text{CDCl}_3$ )

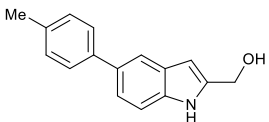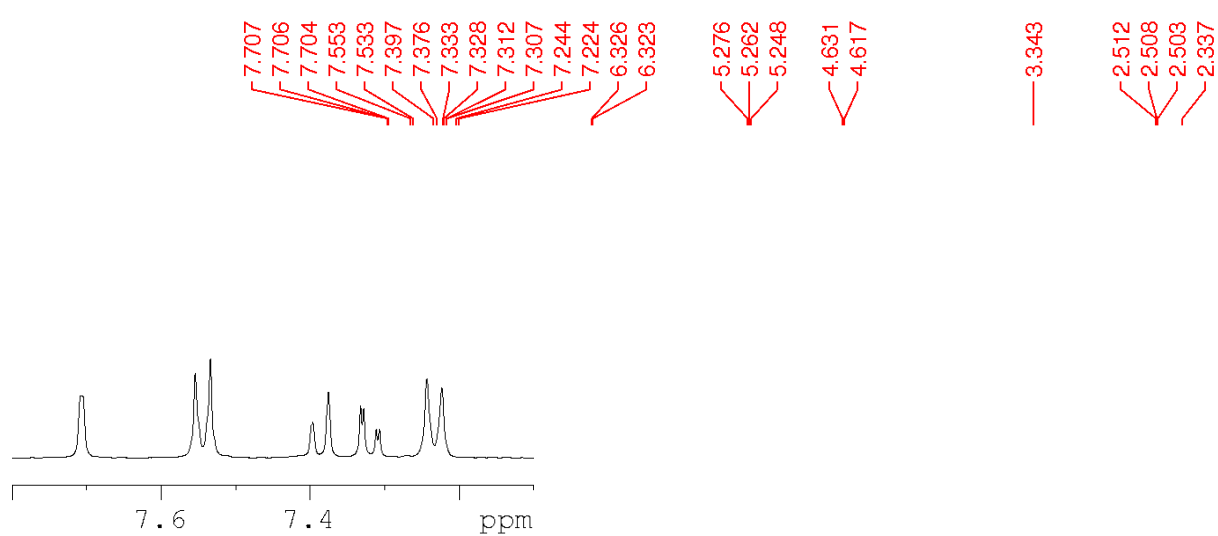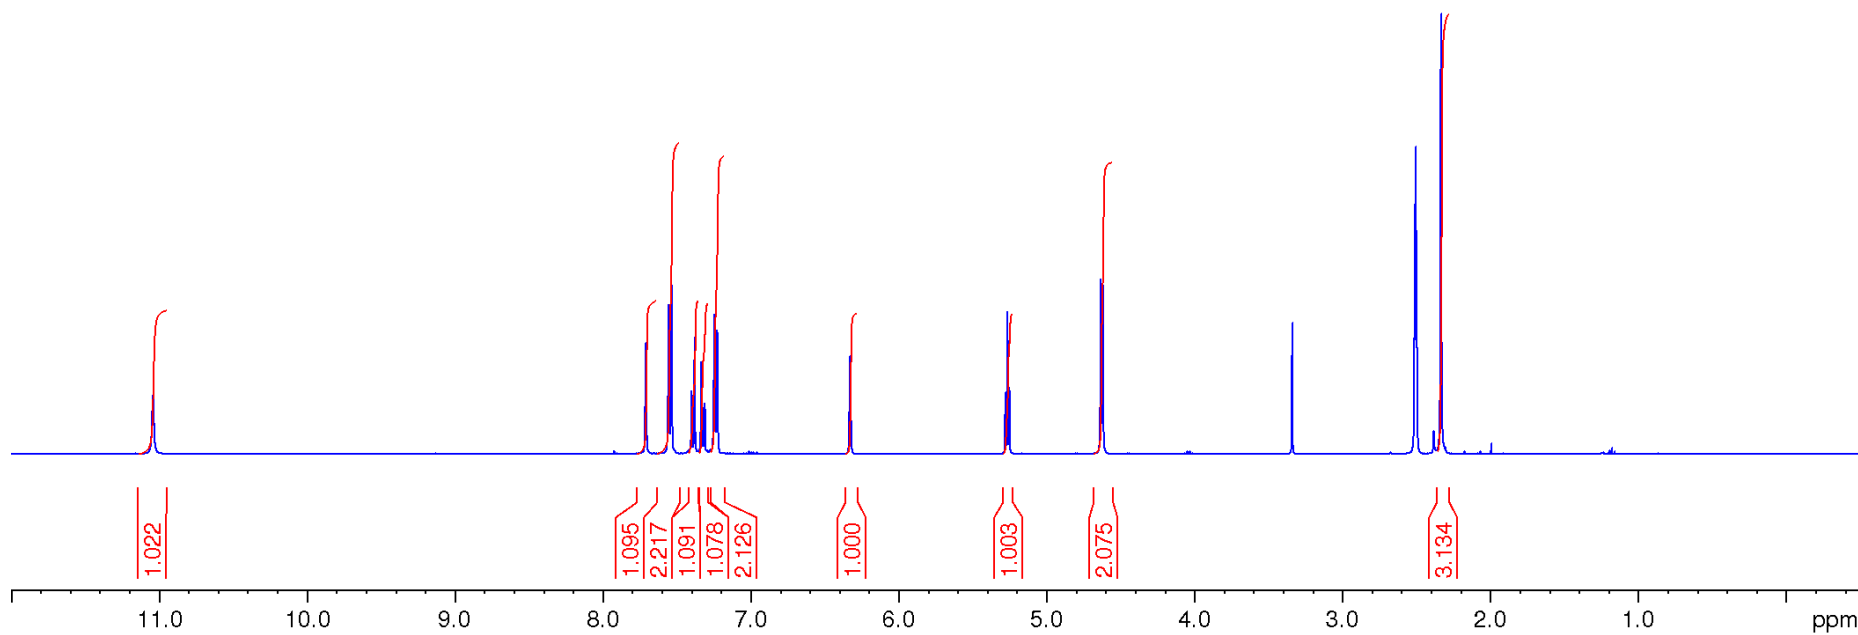

$^{13}\text{C}$  NMR-spectrum (100 MHz,  $\text{CDCl}_3$ )

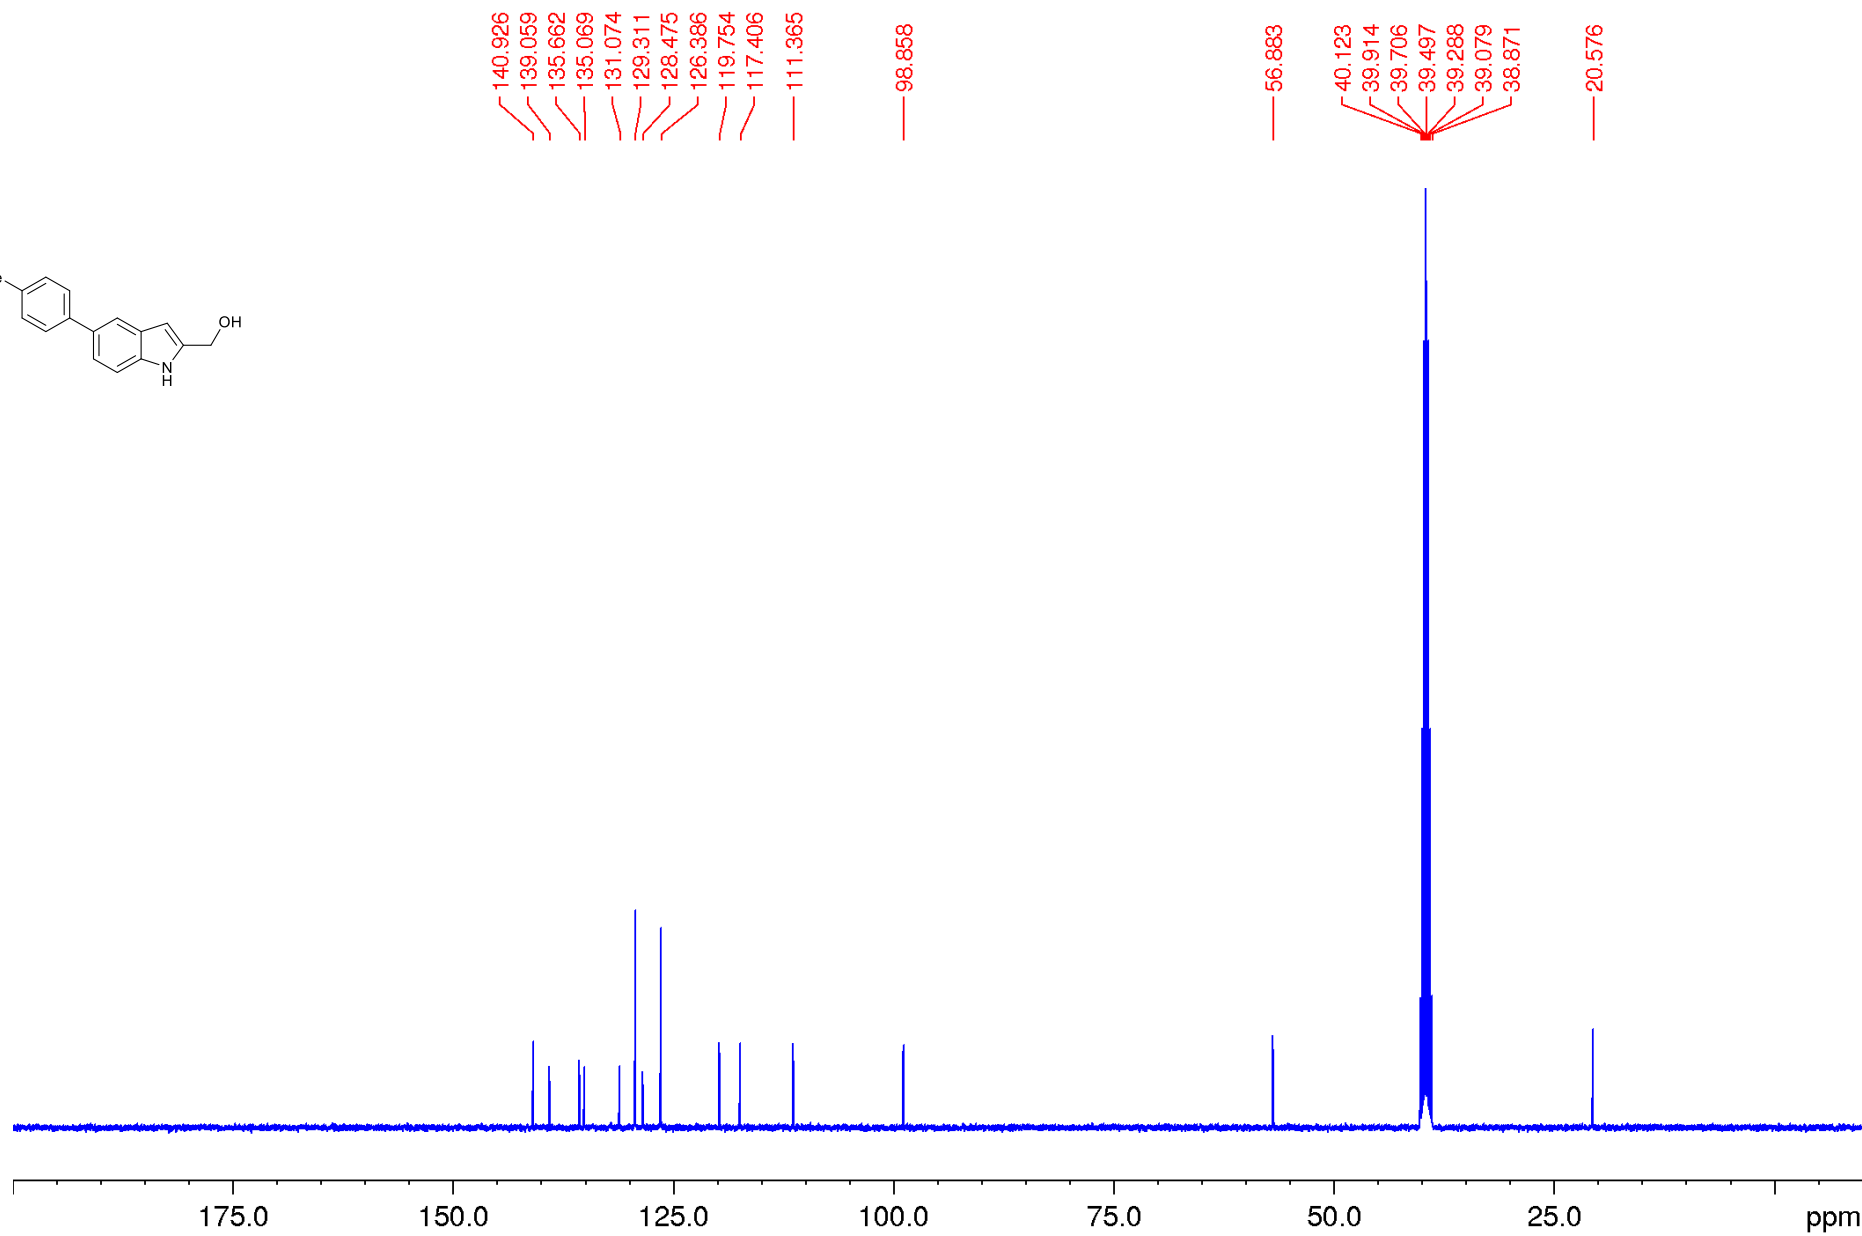



# DEPT 135 NMR-spectrum (DMSO- $d_6$ )

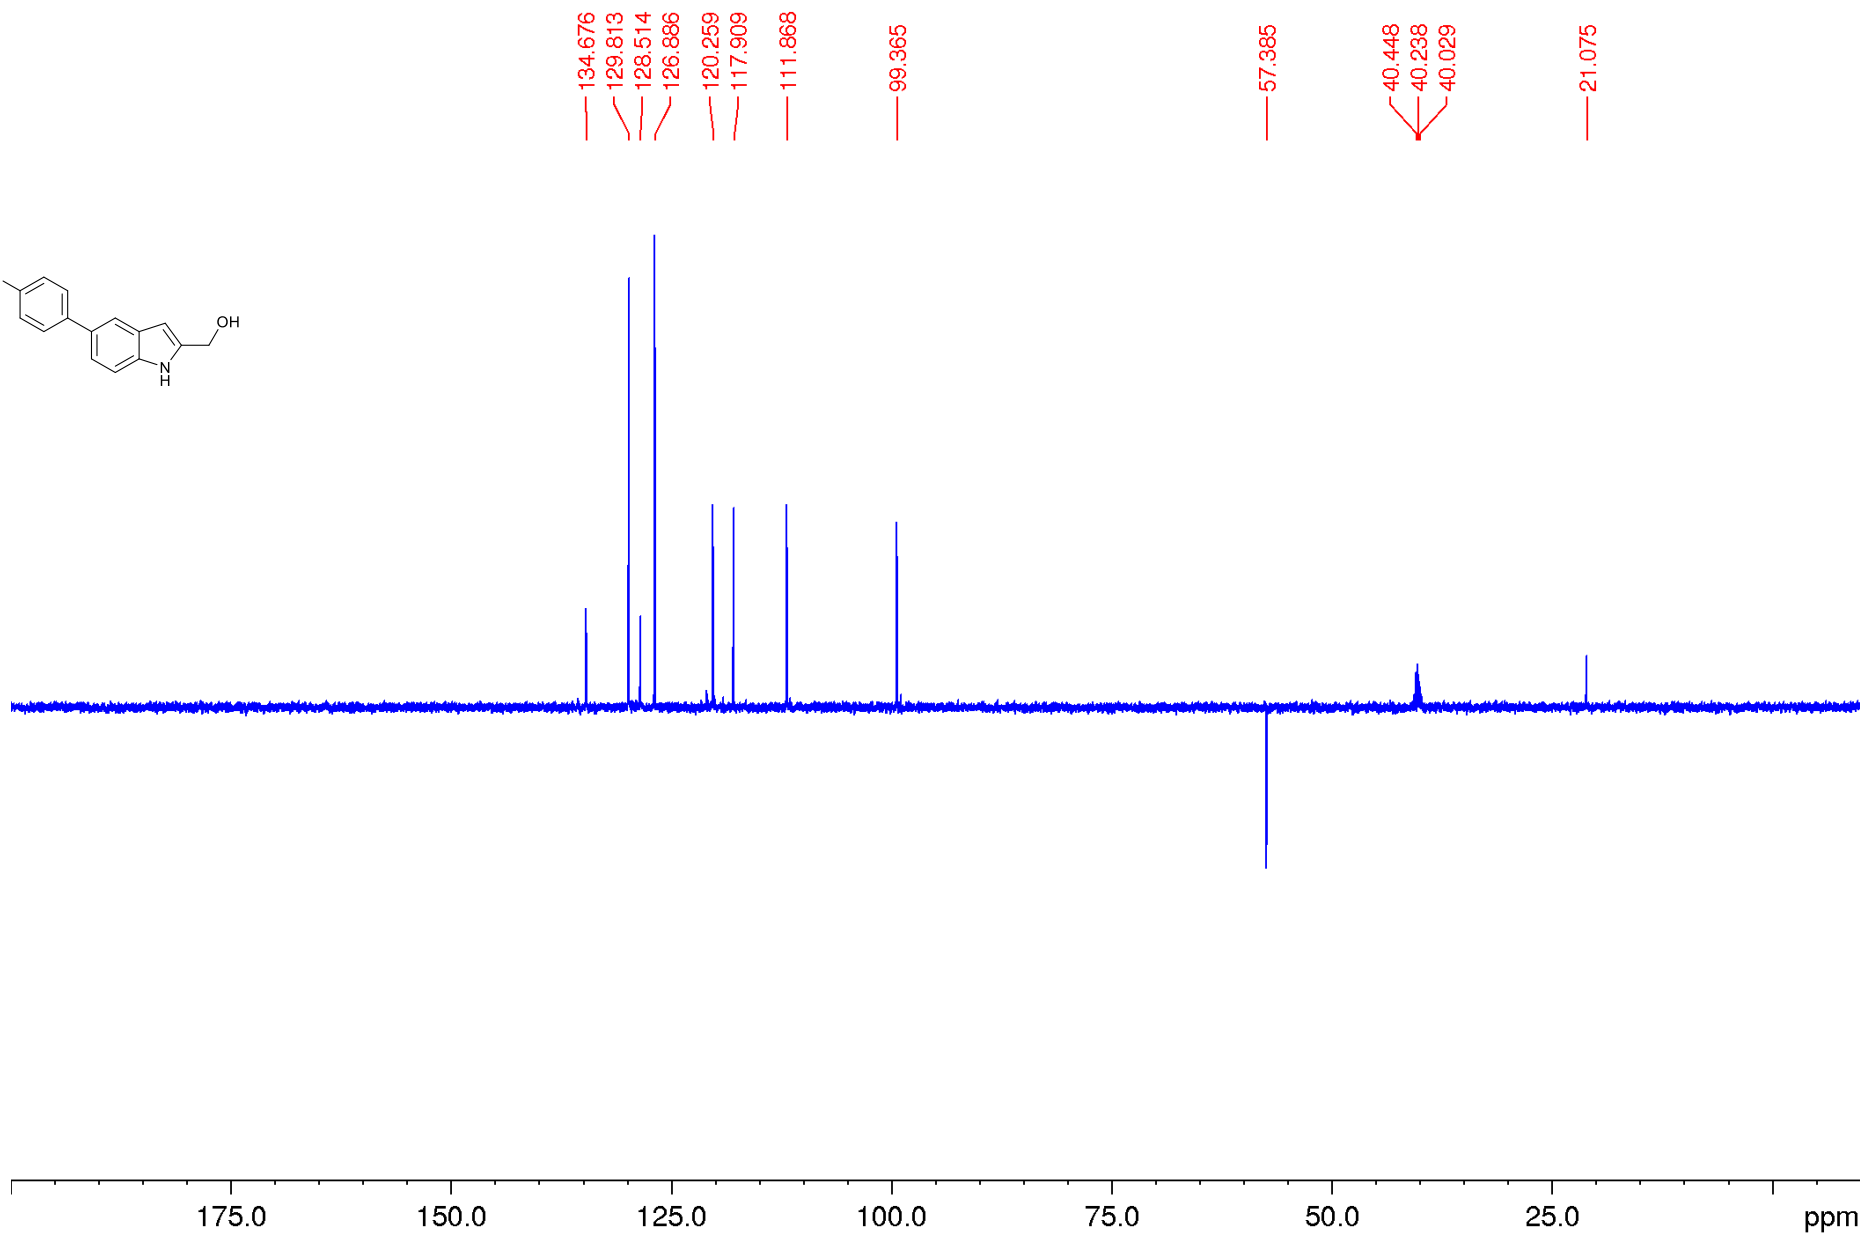

$^1\text{H}$  NMR-spectrum (400 MHz,  $\text{CDCl}_3$ )

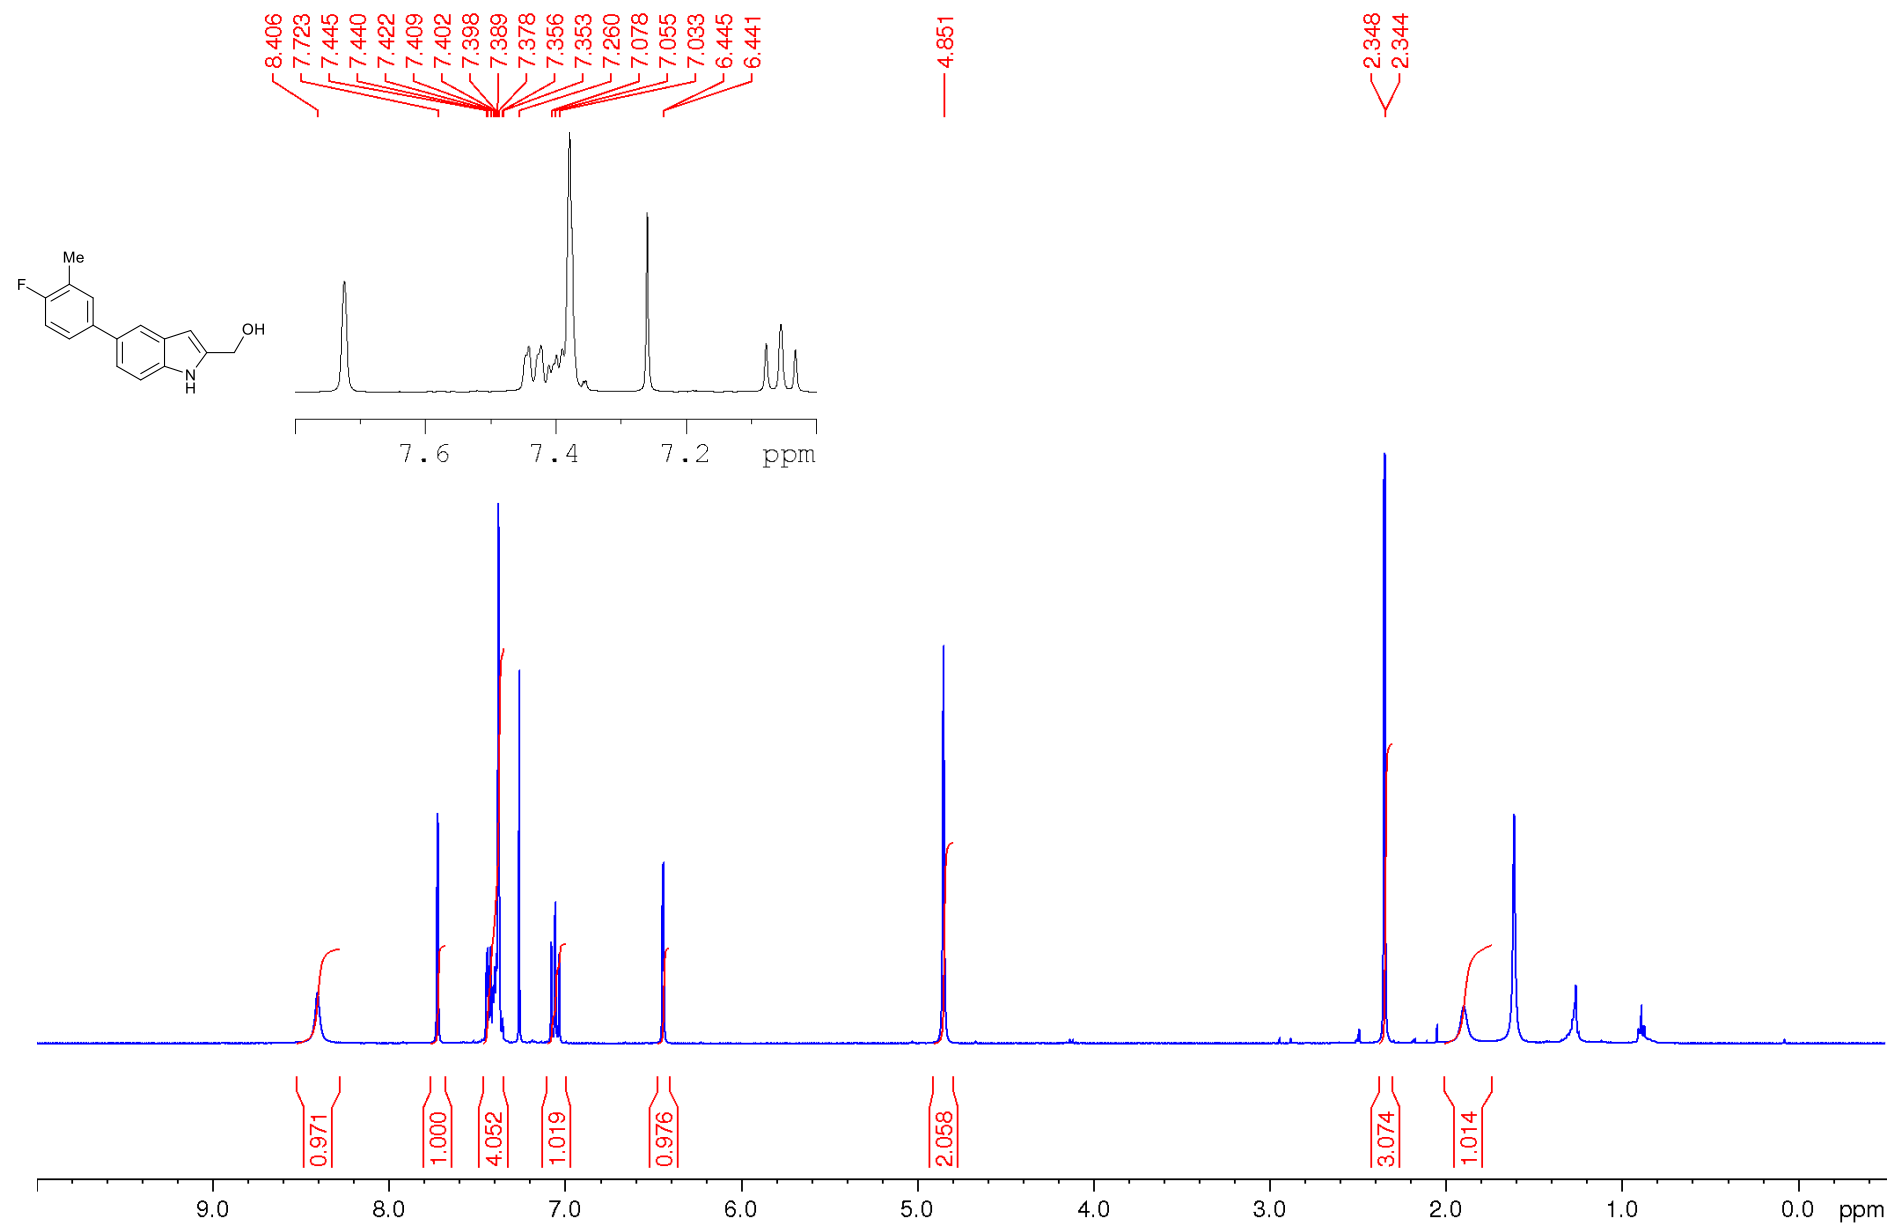

<sup>13</sup>C NMR-spectrum (100 MHz, CDCl<sub>3</sub>)

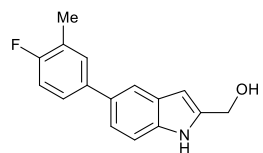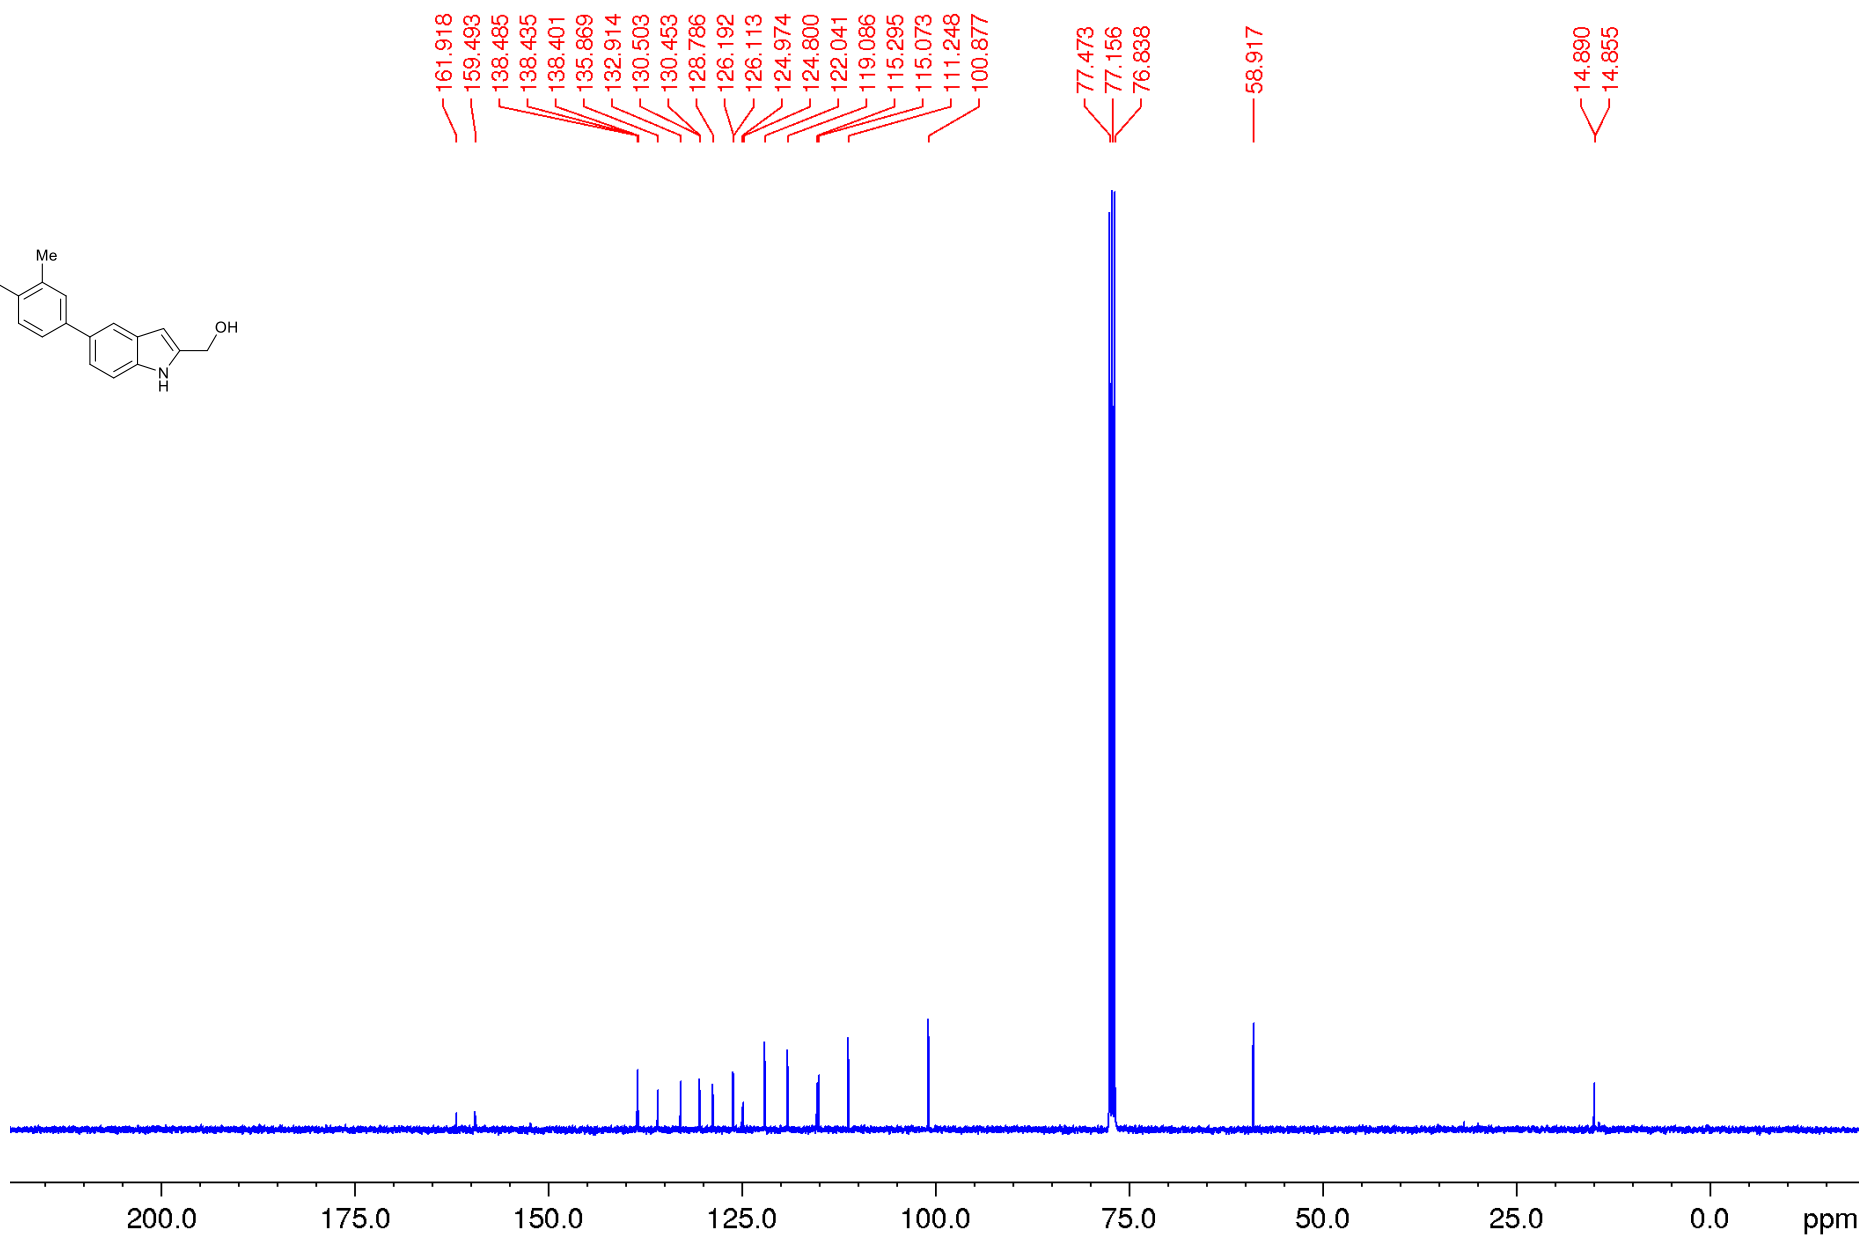

# DEPT 135 NMR-spectrum (CDCl<sub>3</sub>)

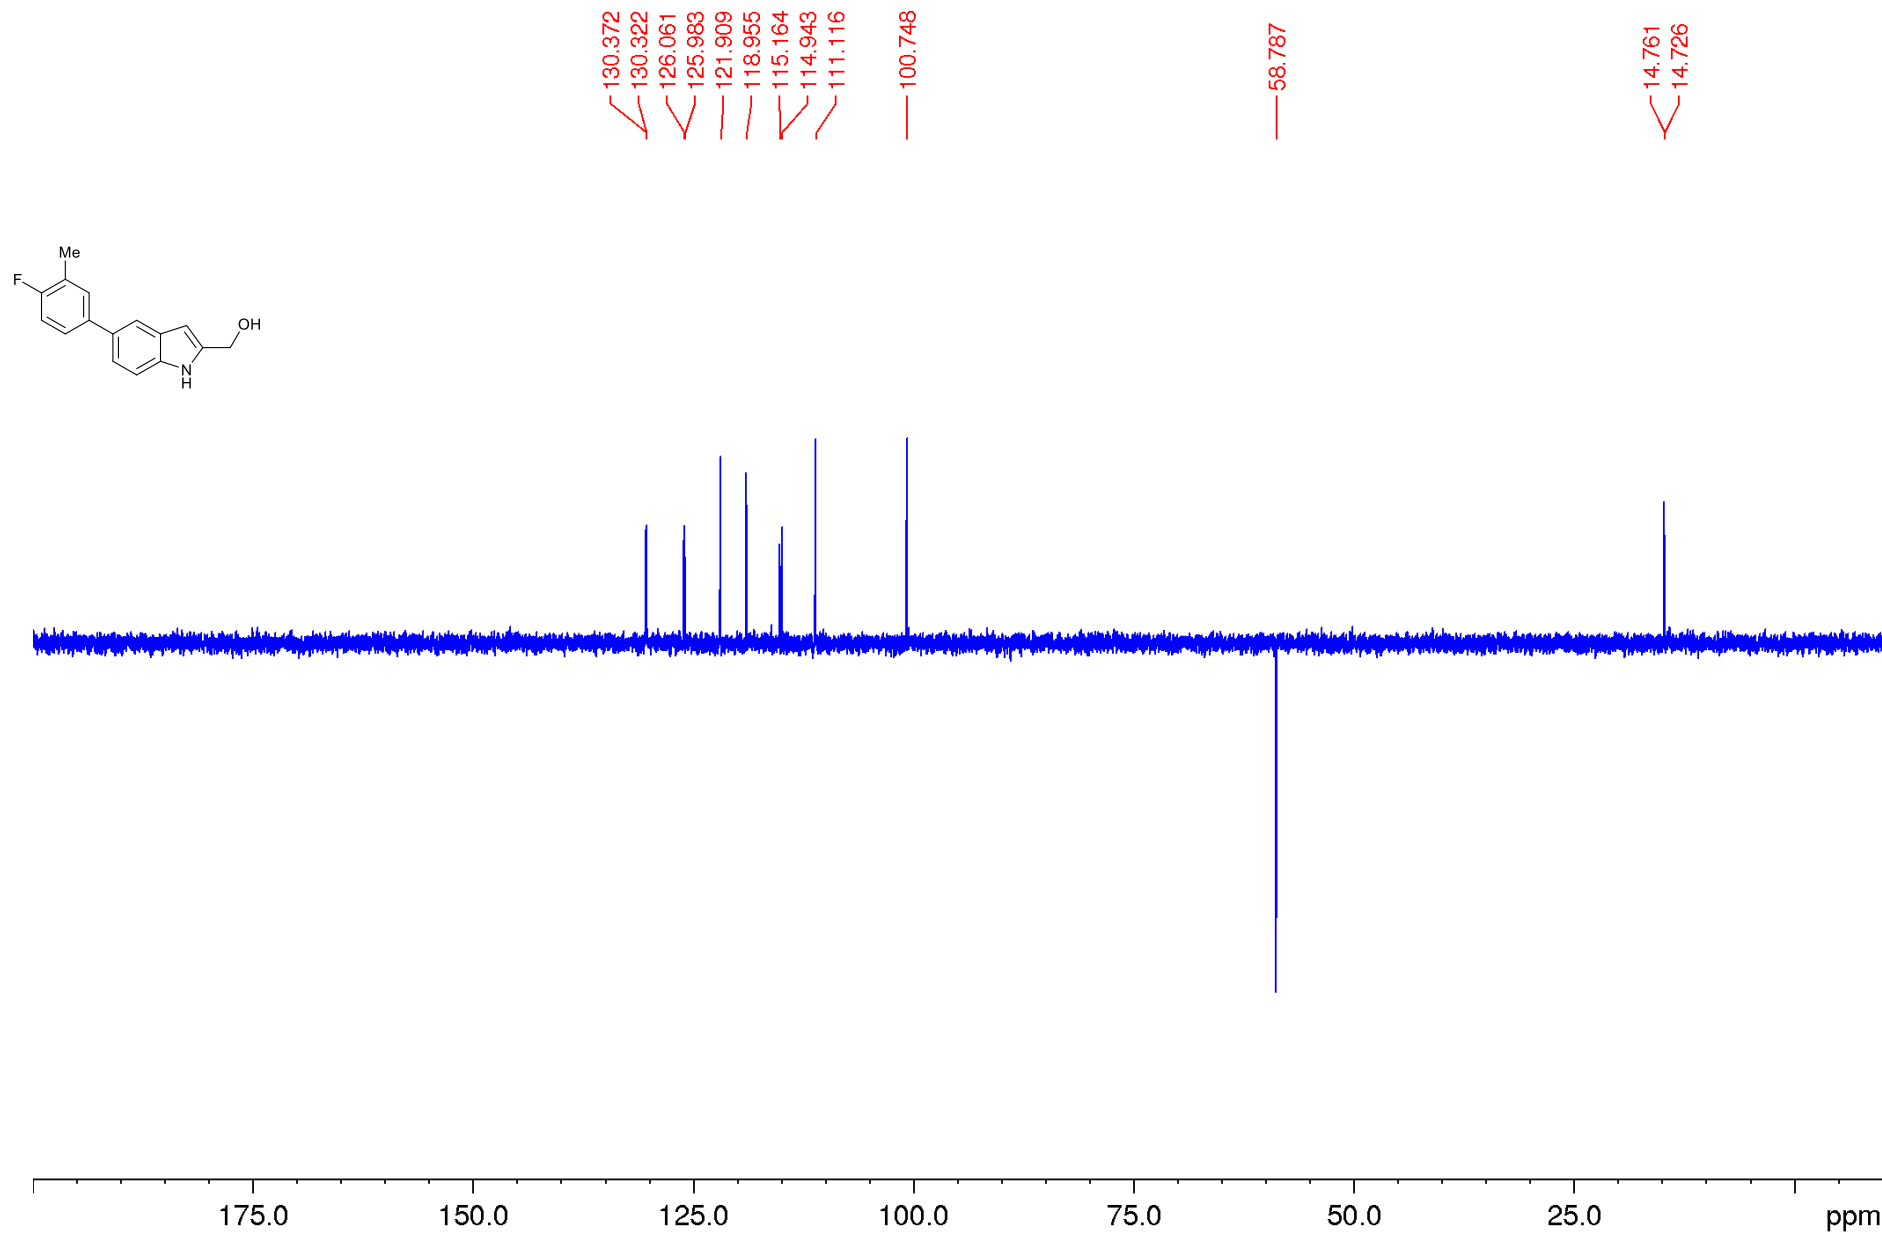

$^{19}\text{F}$  NMR-spectrum (376.5,  $\text{DMSO-}d_6$ )

-121.669  
-121.677  
-121.684  
-121.694  
-121.702  
-121.709  
-121.726

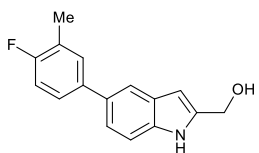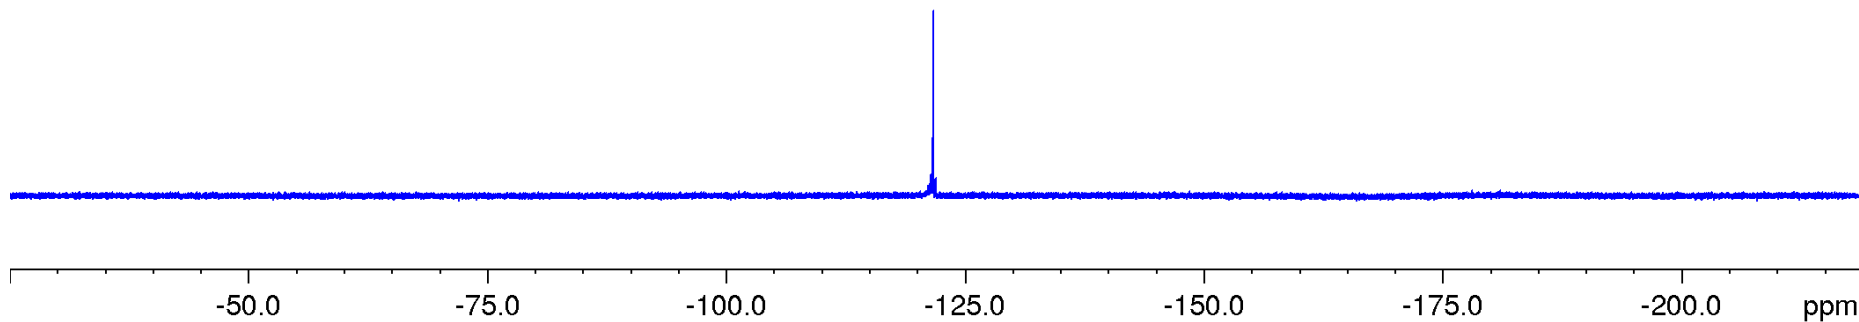

$^1\text{H}$  NMR-spectrum (400 MHz,  $\text{CDCl}_3$ )

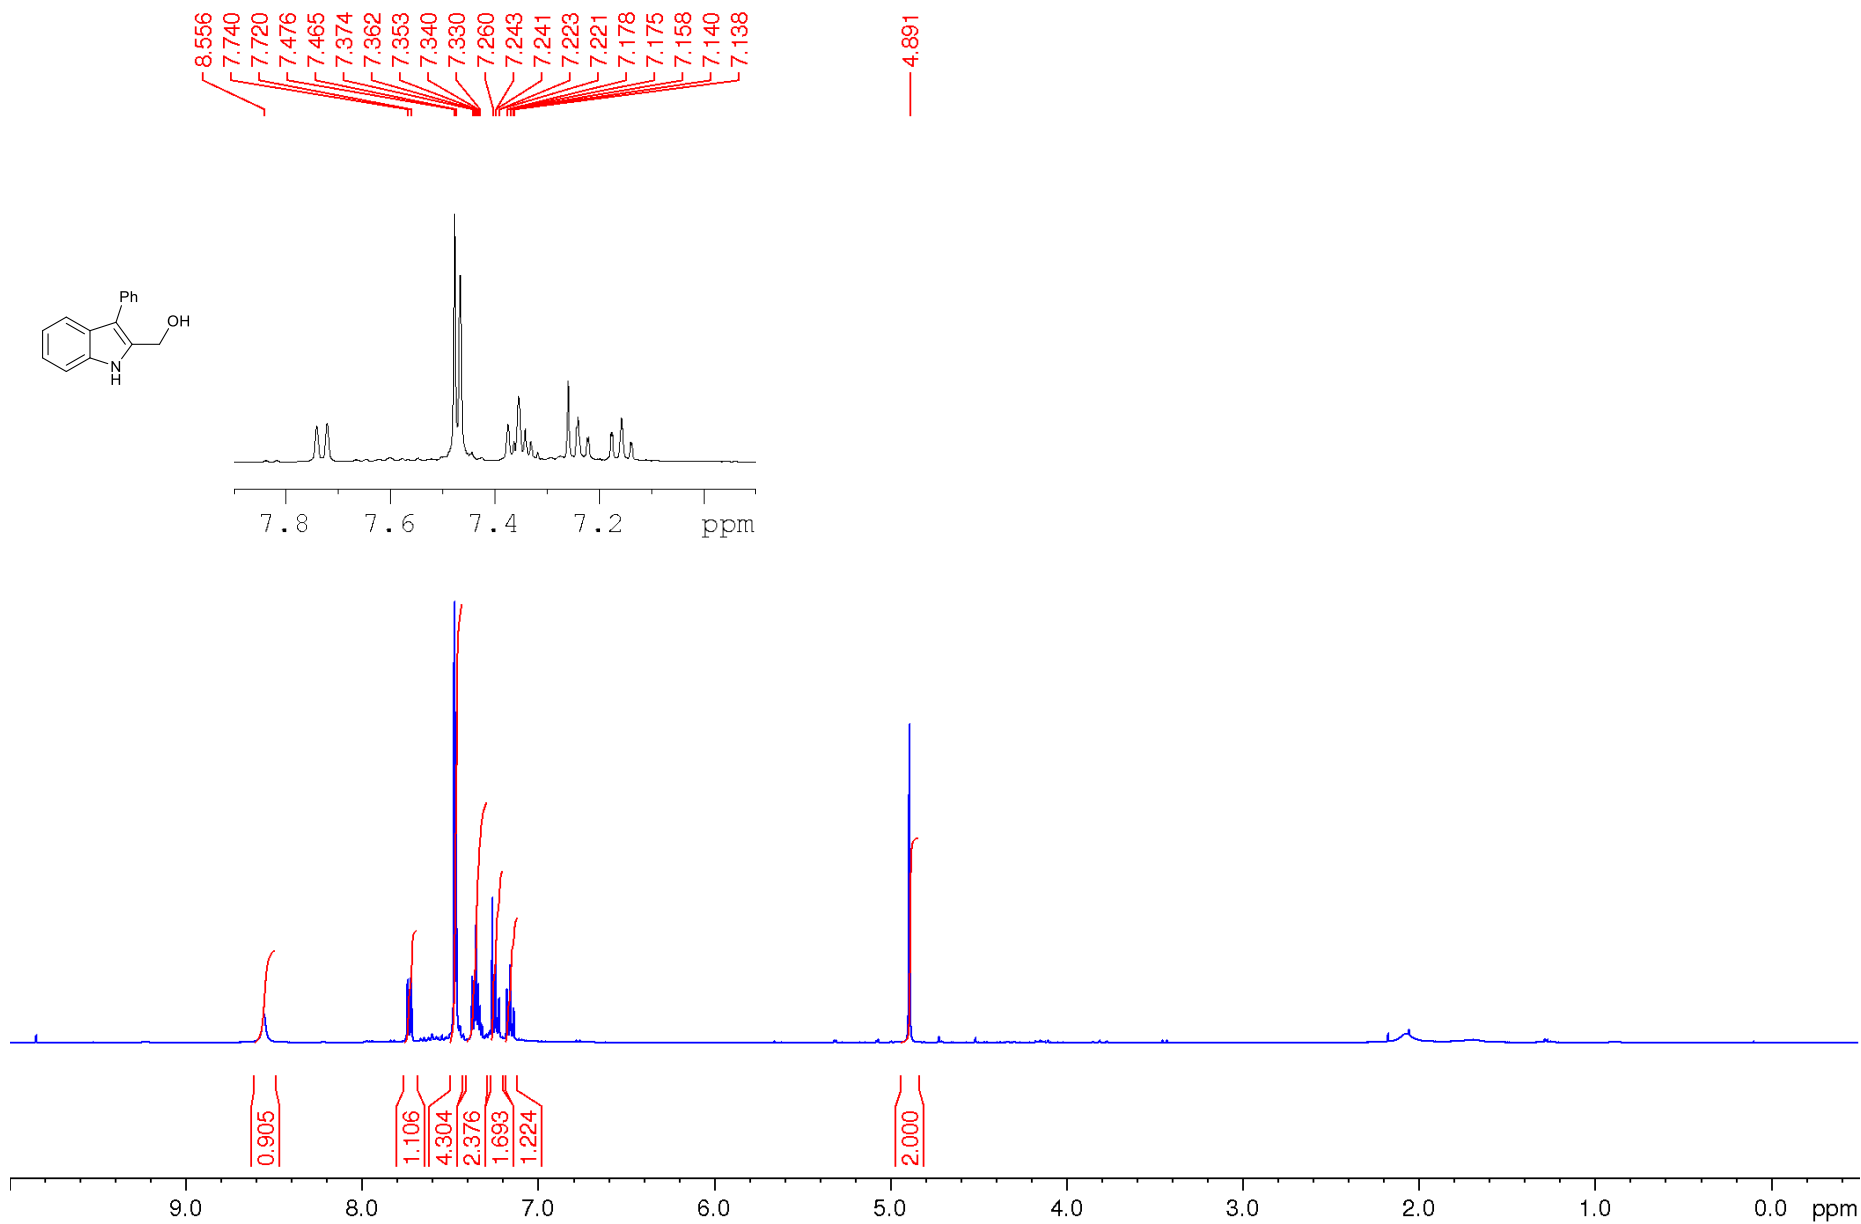

$^{13}\text{C}$  NMR-spectrum (100 MHz,  $\text{CDCl}_3$ )

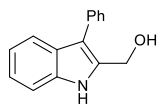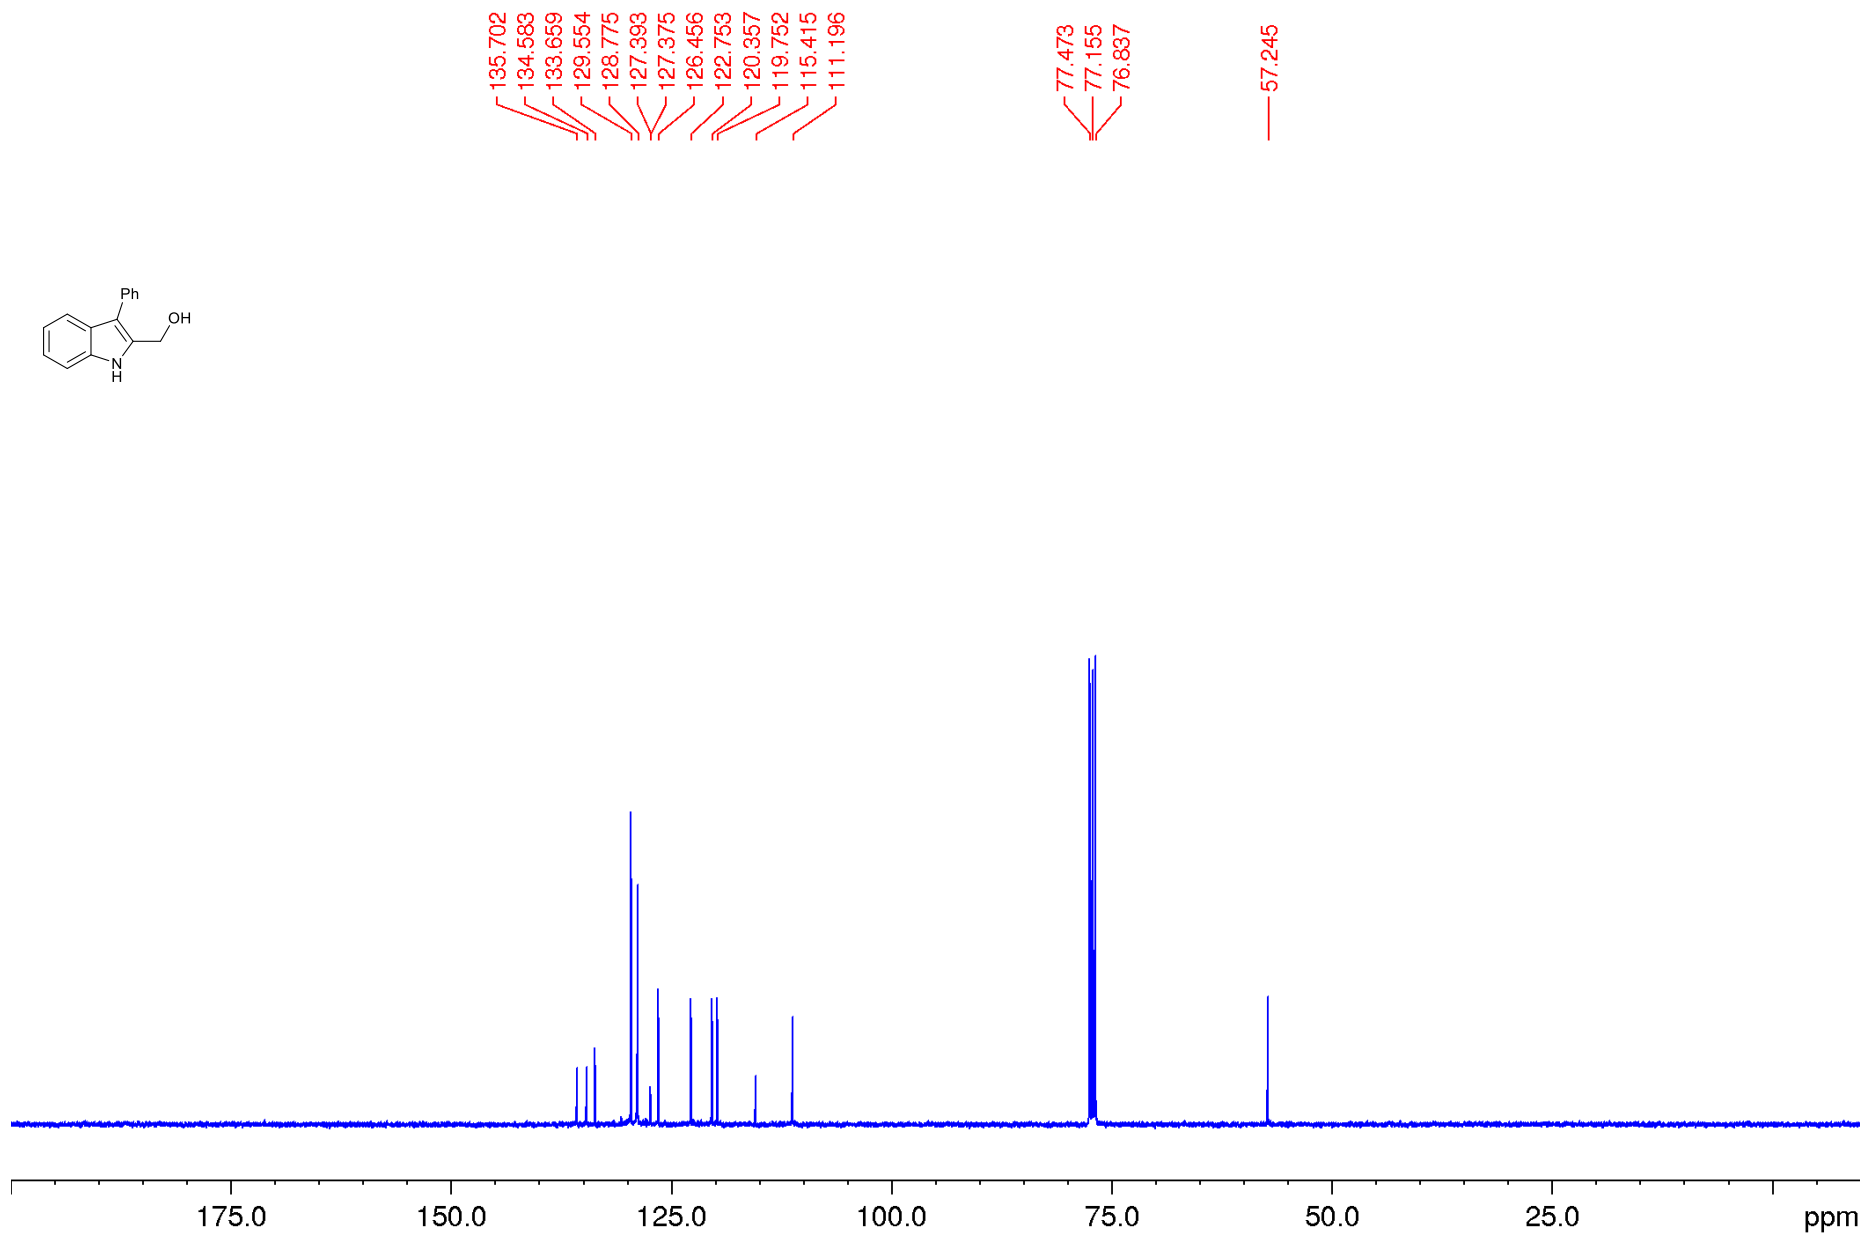

# DEPT 135 NMR-spectrum (CDCl<sub>3</sub>)

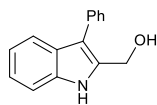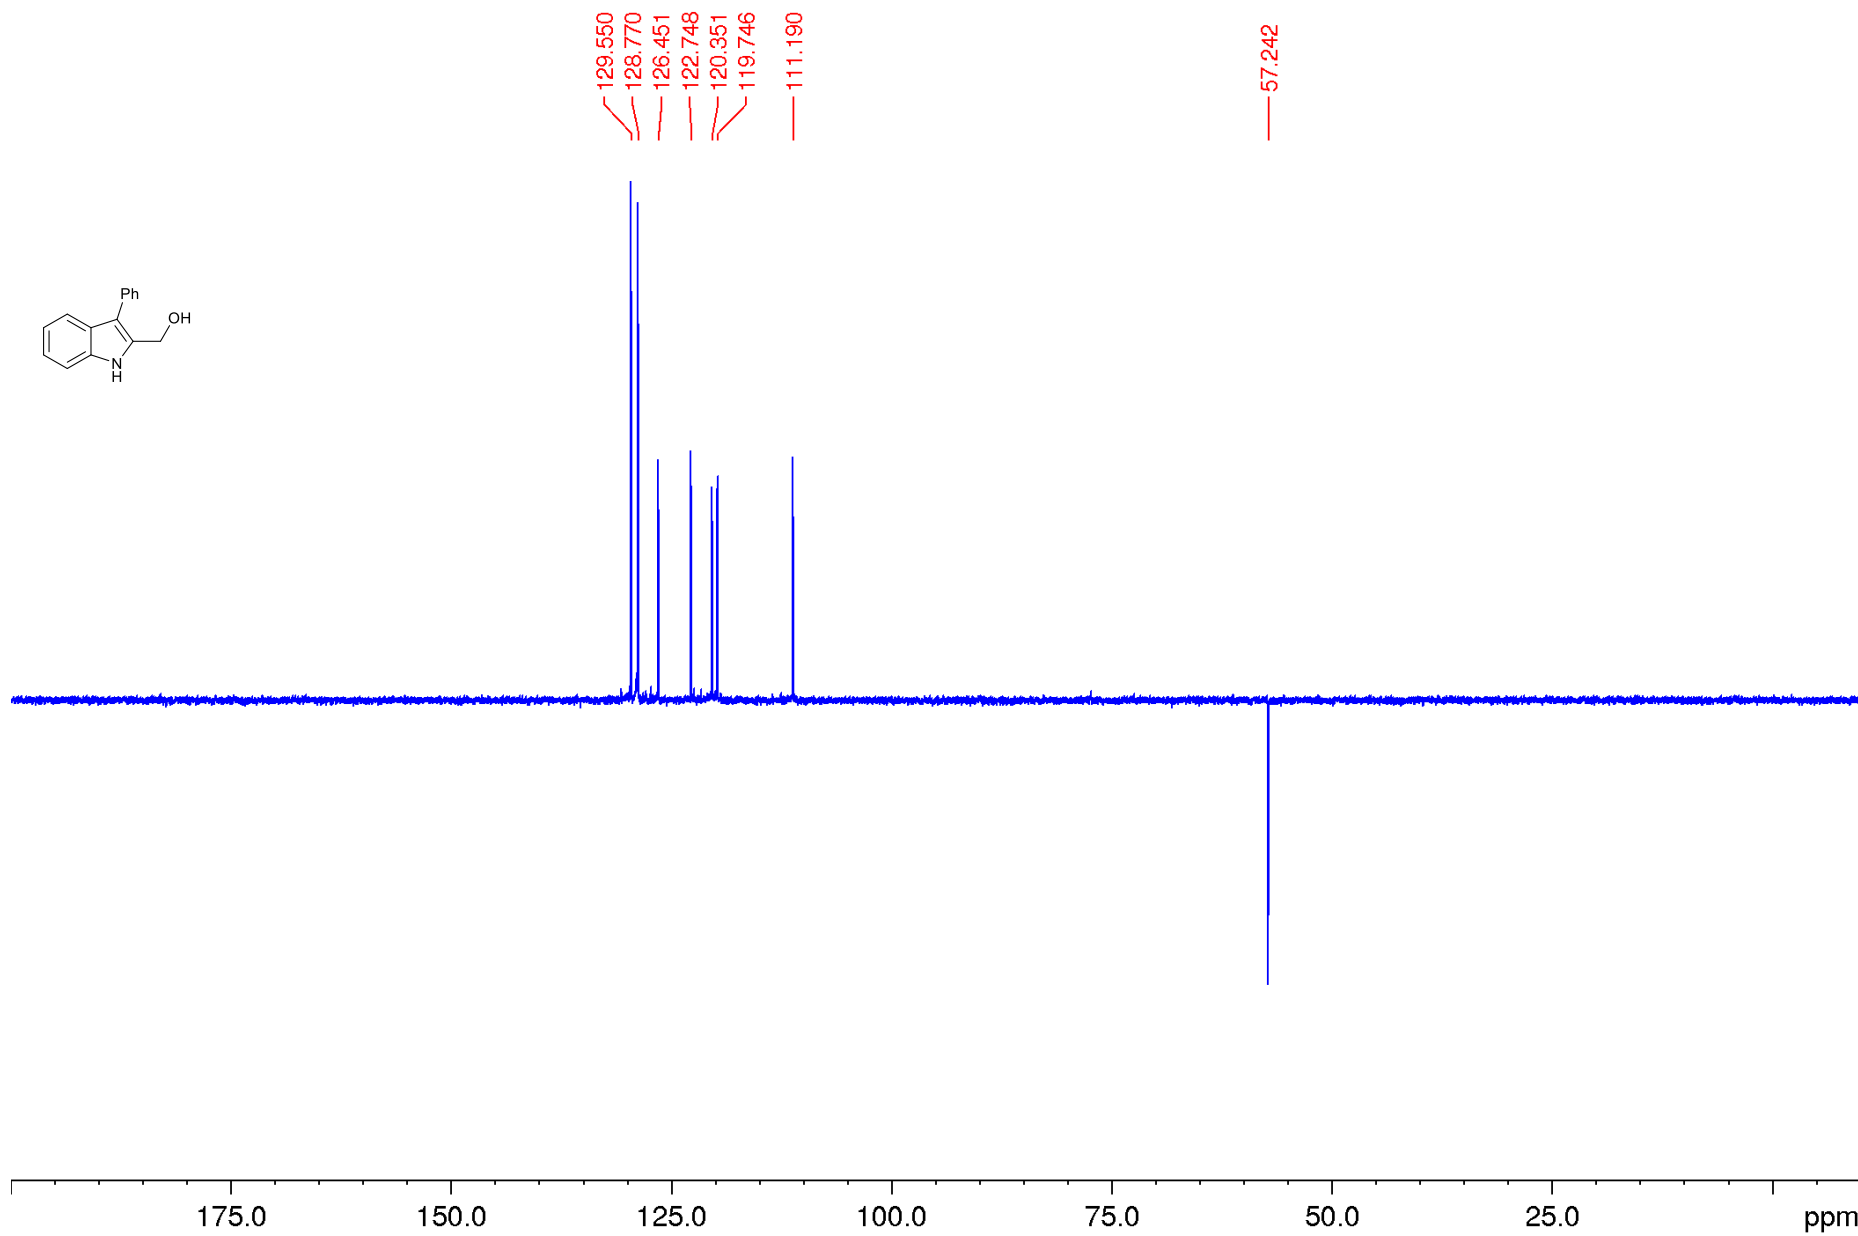



# <sup>1</sup>H NMR-spectrum (400 MHz, CDCl<sub>3</sub>)

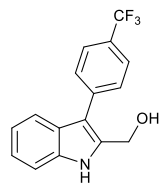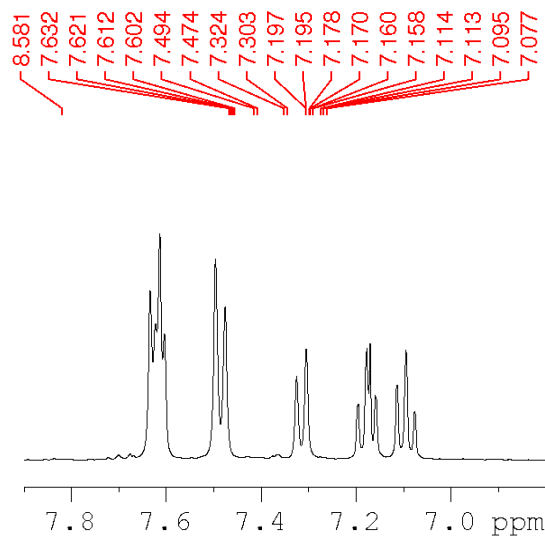

4.833

1.982

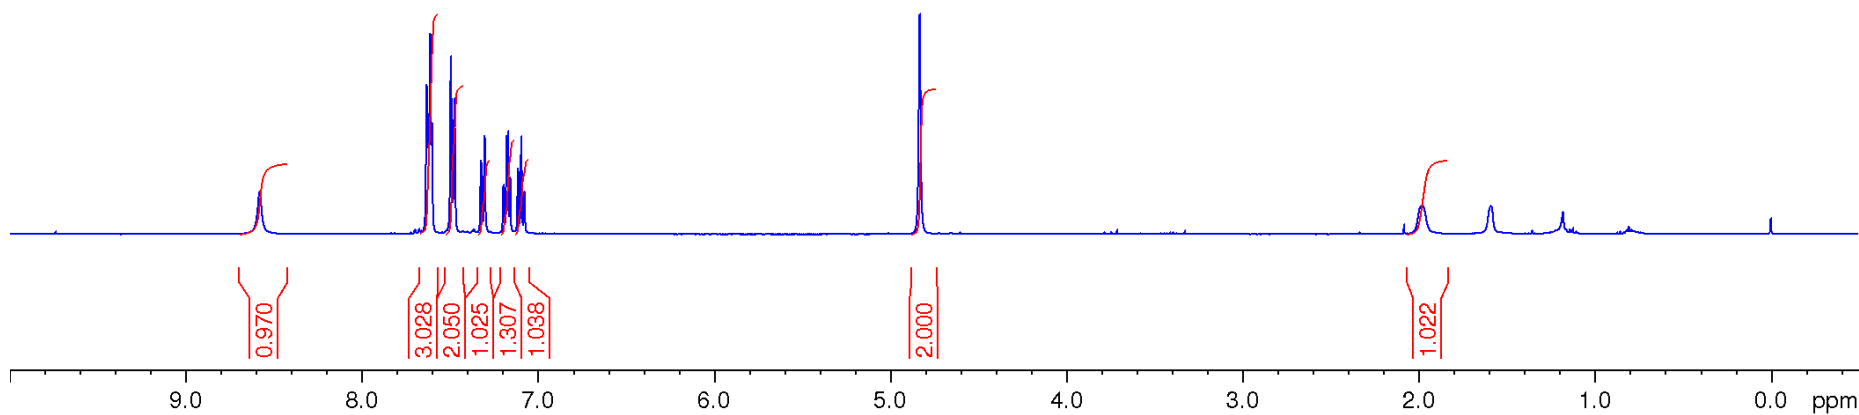

$^{13}\text{C}$  NMR-spectrum (100 MHz,  $\text{CDCl}_3$ )

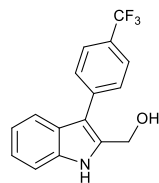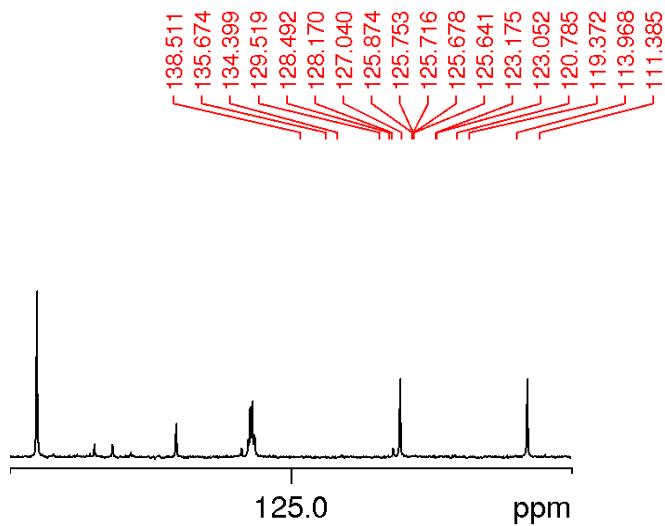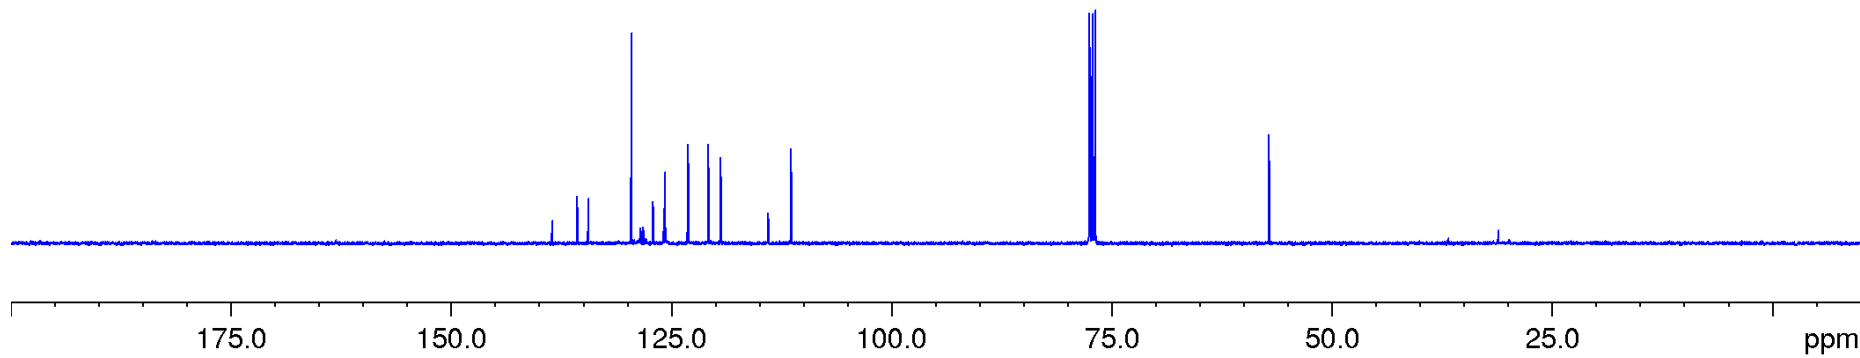

# DEPT 135 NMR-spectrum (CDCl<sub>3</sub>)

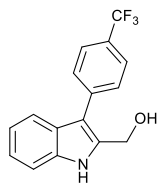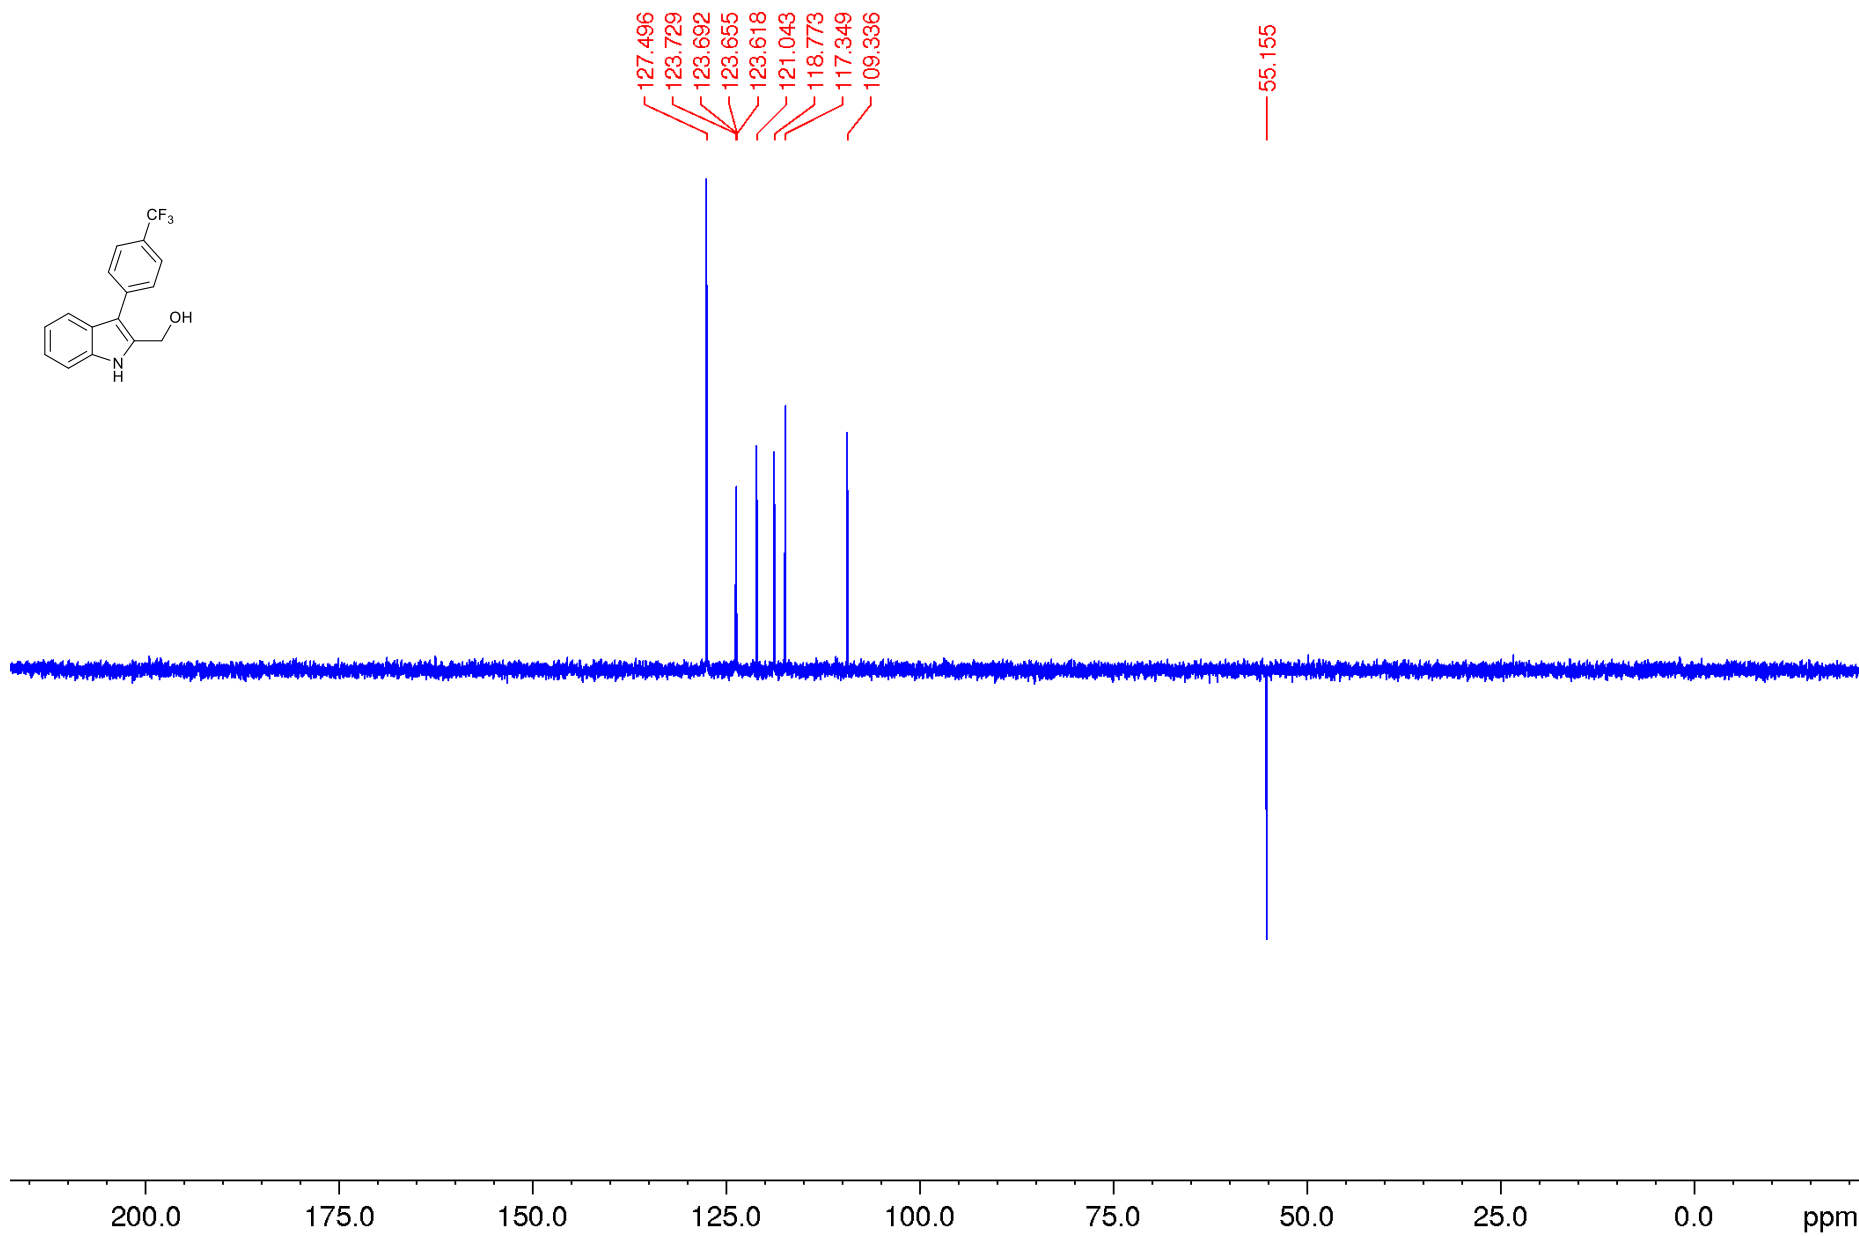

$^{19}\text{F}$  NMR-spectrum (376.5,  $\text{DMSO-}d_6$ )

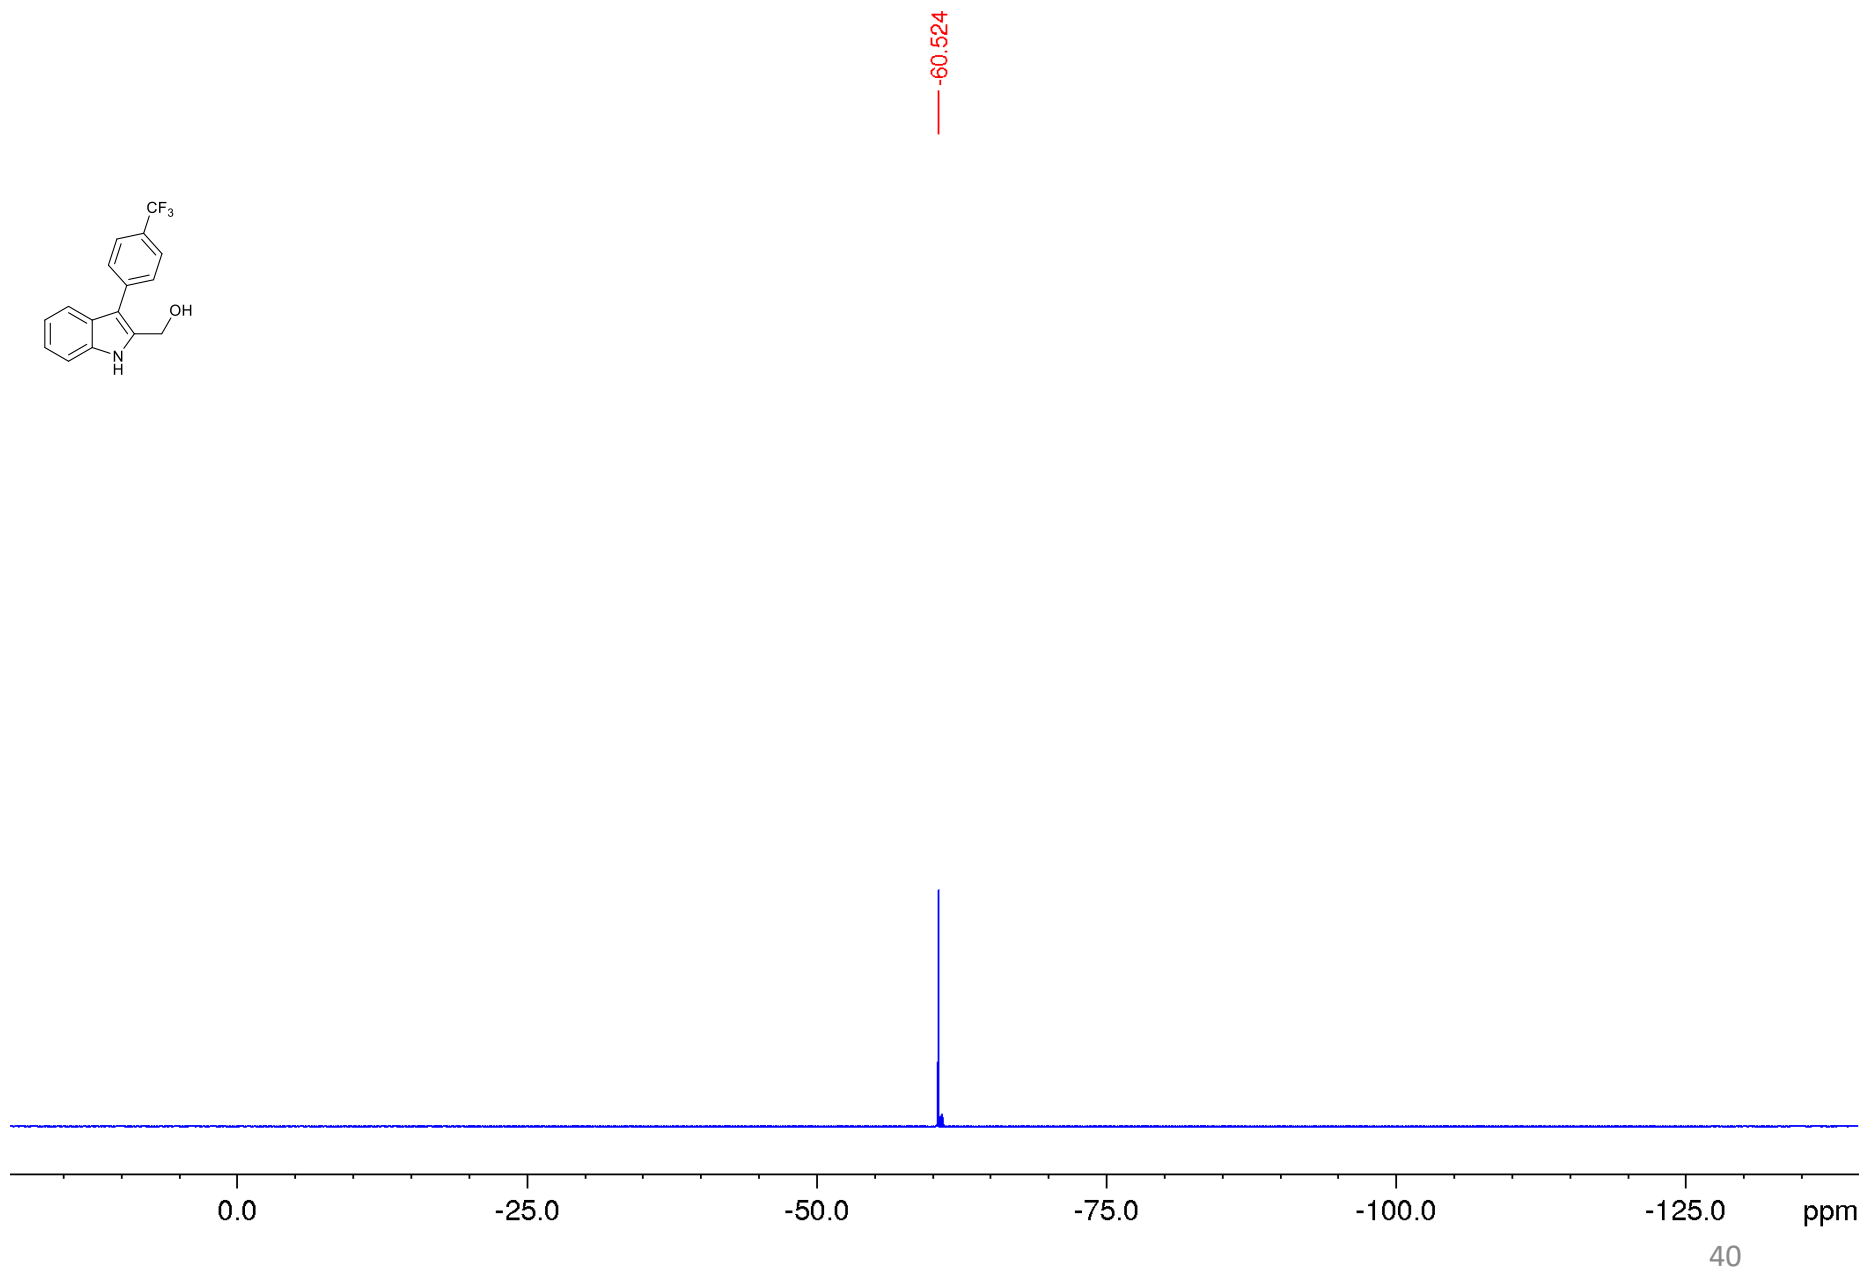

$^1\text{H}$  NMR-spectrum (400 MHz,  $\text{CDCl}_3$ )

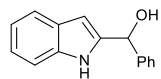

8.449  
7.688  
7.669  
7.432  
7.415  
7.294  
7.289  
7.286  
7.283  
7.274  
7.270  
7.258  
7.252  
7.242  
7.239  
7.233  
7.224  
6.326  
6.321  
5.852  
3.797  
3.790

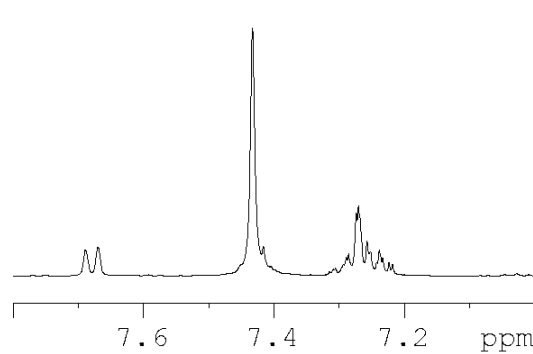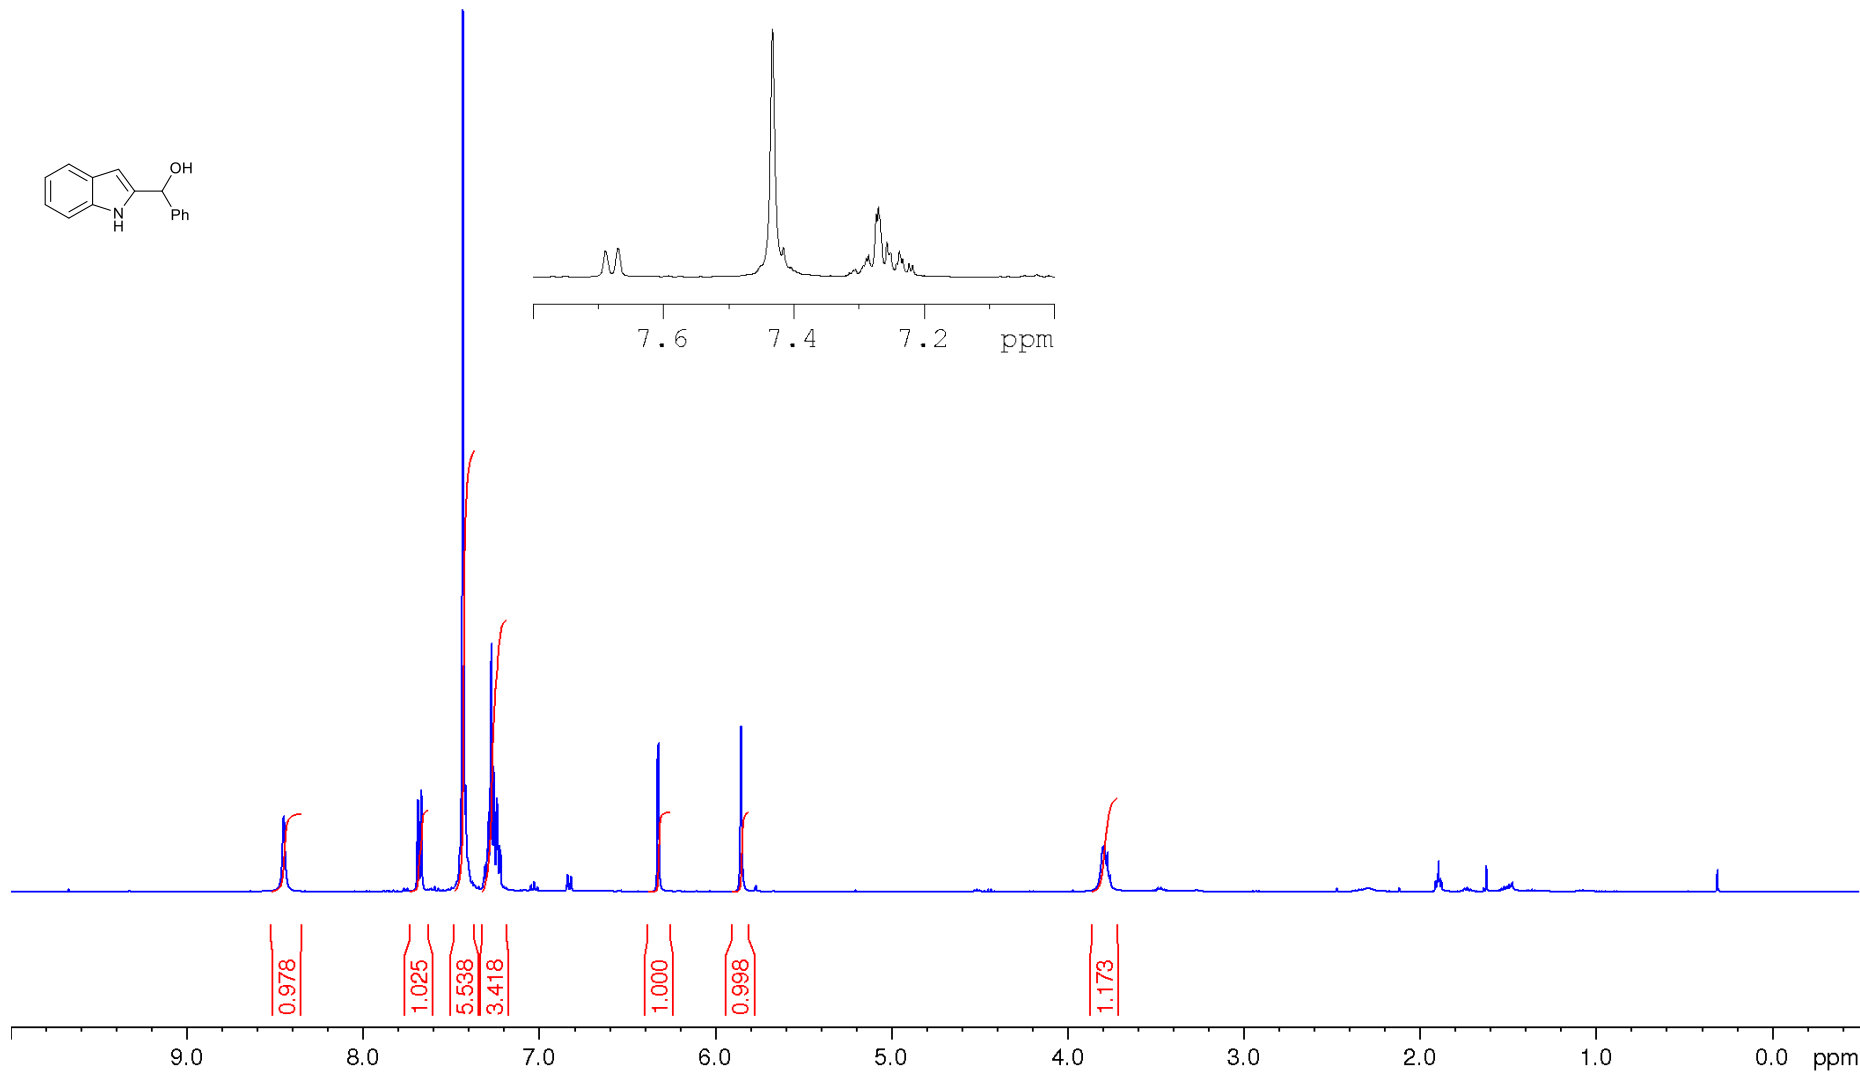

$^{13}\text{C}$  NMR-spectrum (100 MHz,  $\text{CDCl}_3$ )

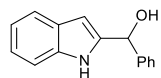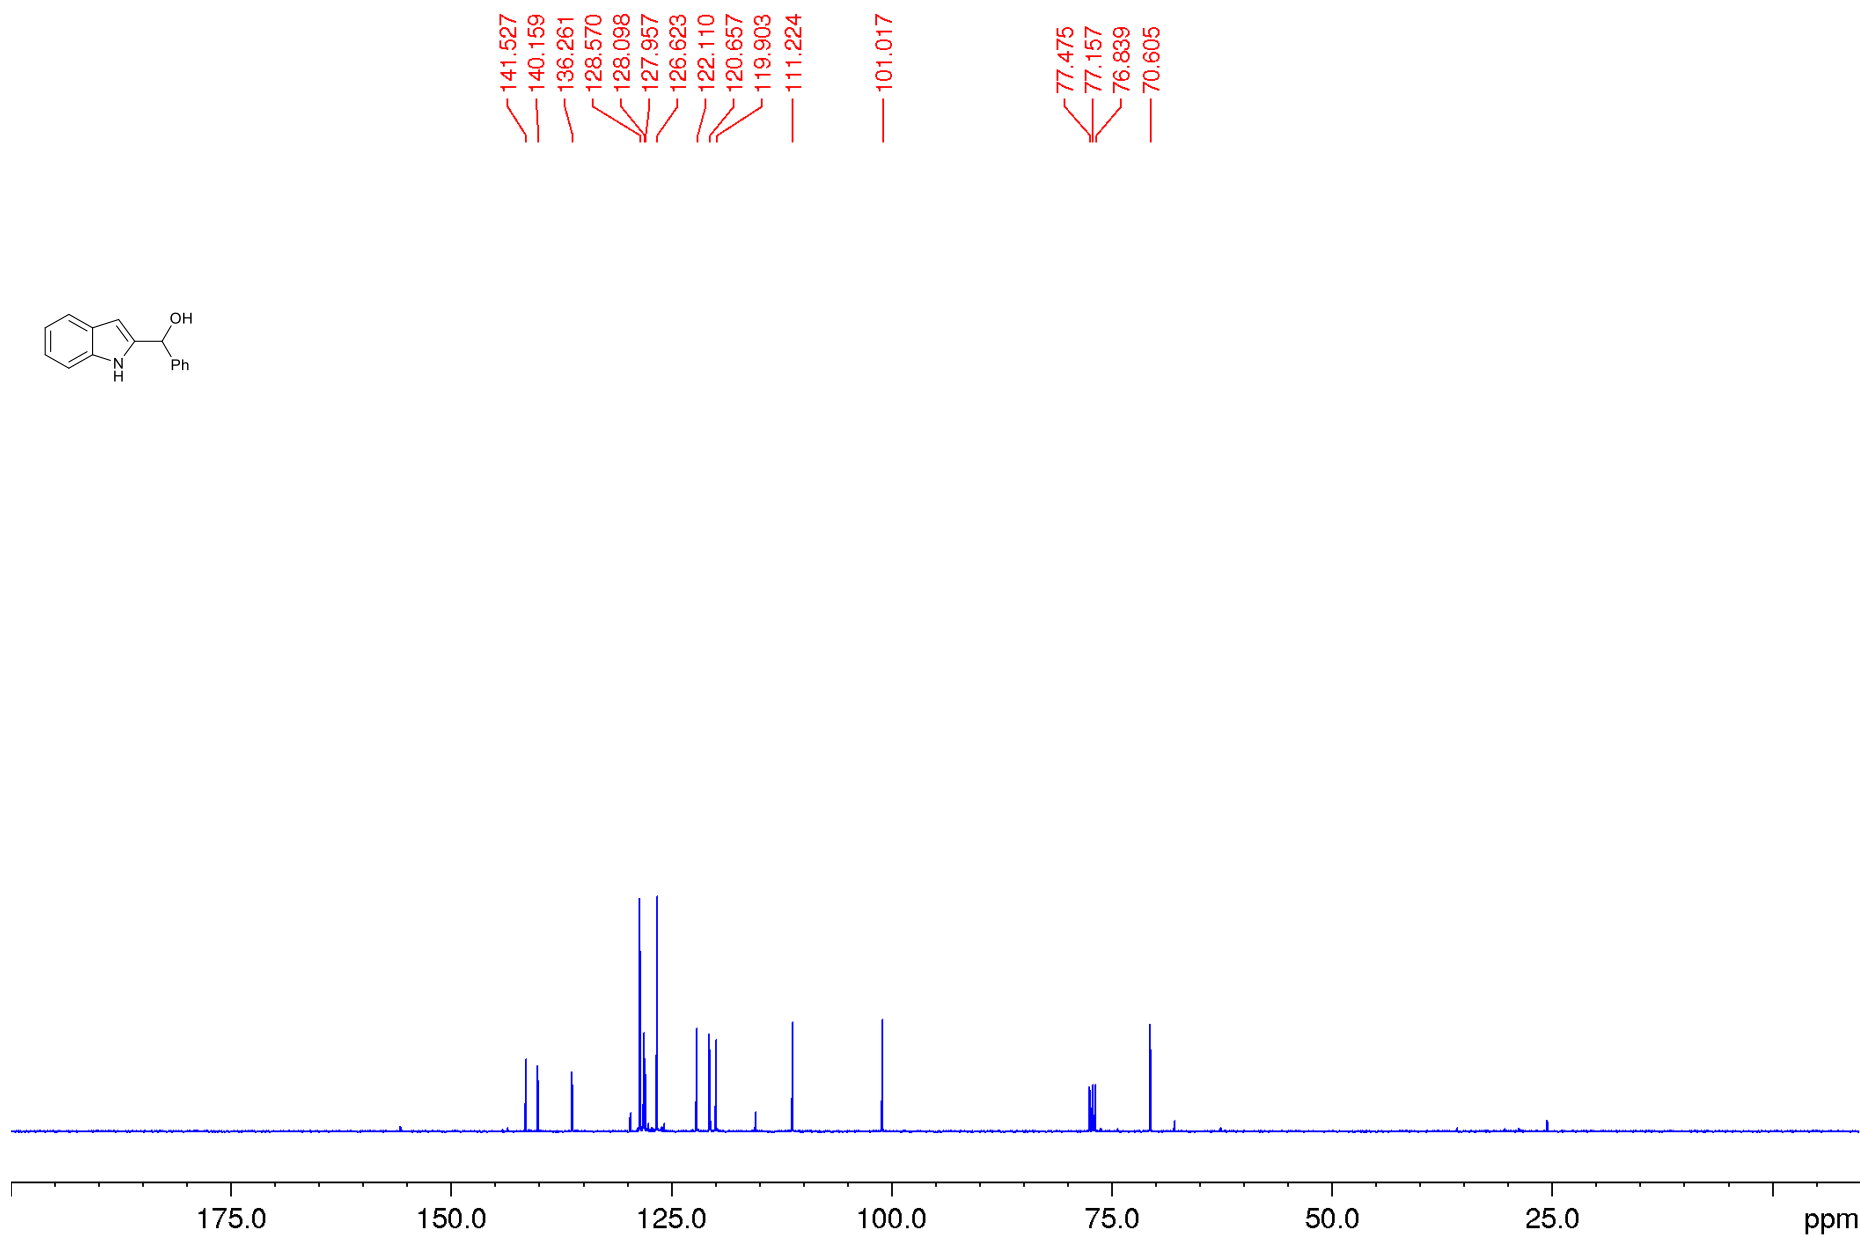

# DEPT 135 NMR-spectrum (CDCl<sub>3</sub>)

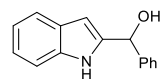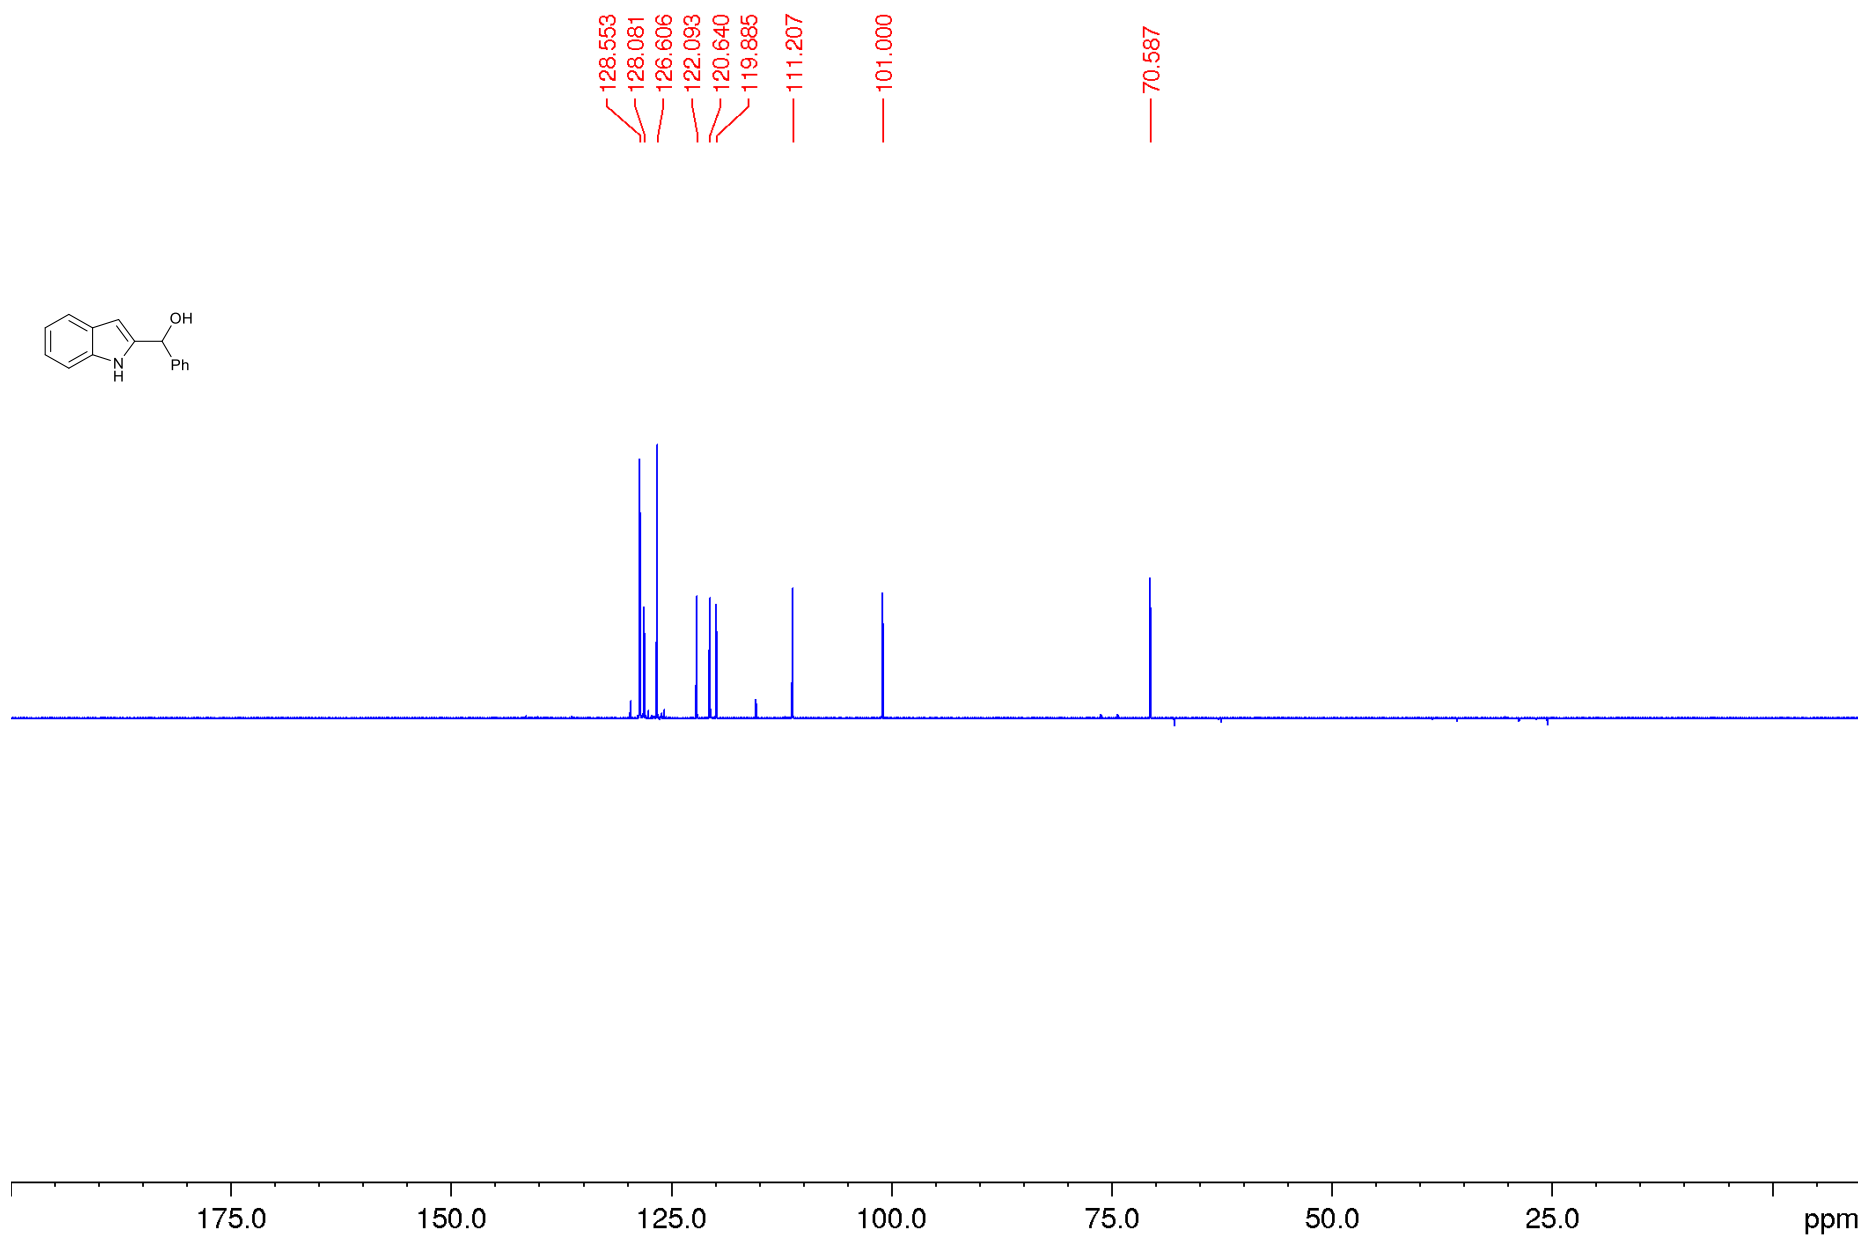

# $^1\text{H}$ NMR-spectrum (400 MHz, $\text{CDCl}_3$ )

8.434  
7.589  
7.570  
7.344  
7.343  
7.325  
7.323  
7.197  
7.194  
7.179  
7.177  
7.159  
7.156  
7.122  
7.120  
7.102  
7.085  
7.083  
6.355  
6.352  
6.350  
5.092  
5.076  
5.060  
5.044

2.122

1.639  
1.623

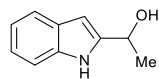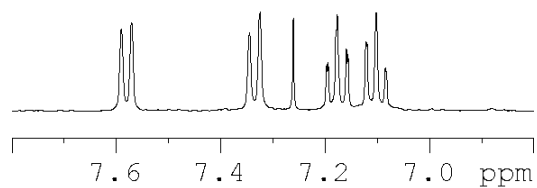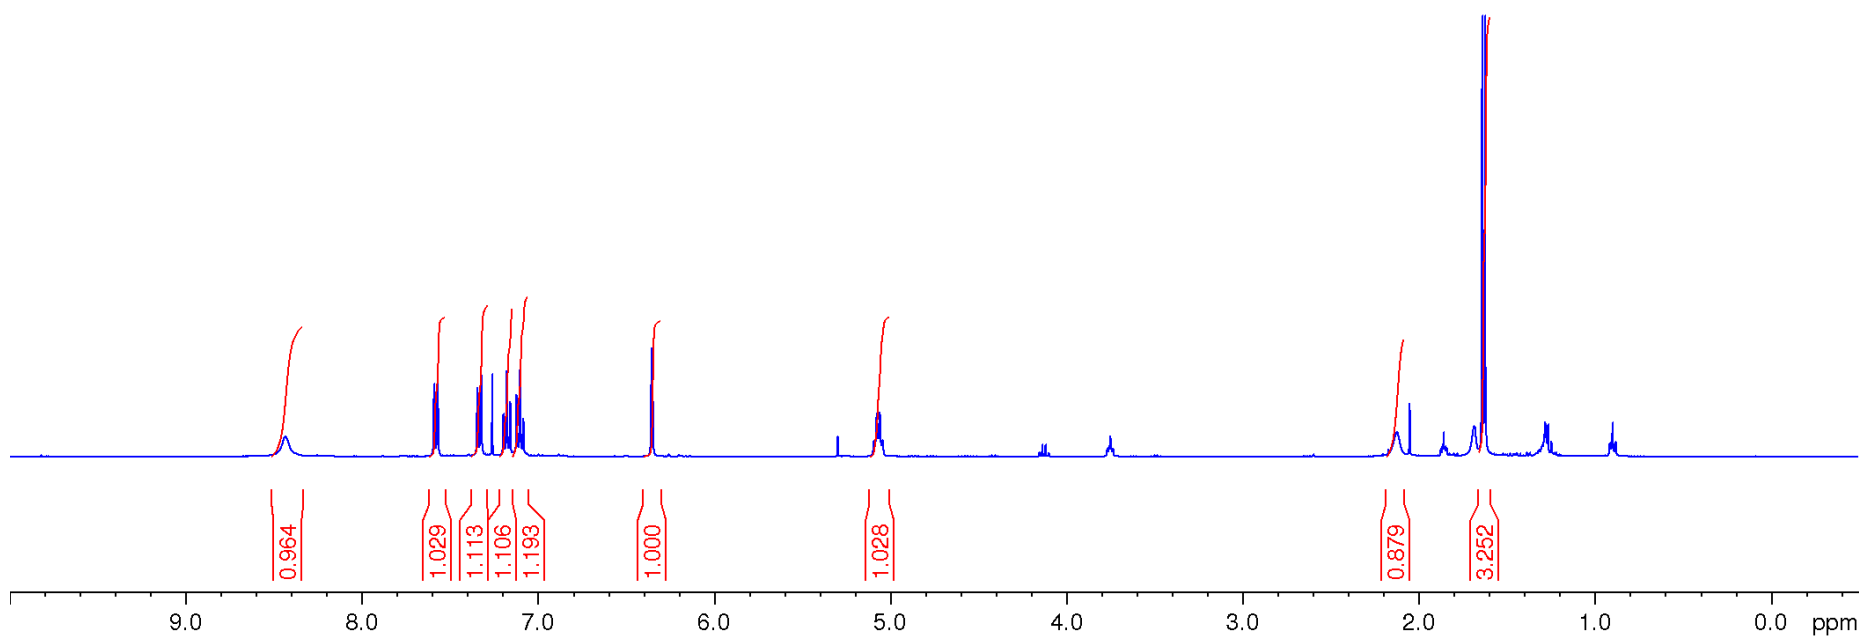



$^{13}\text{C}$  NMR-spectrum (100 MHz,  $\text{CDCl}_3$ )

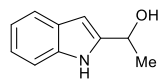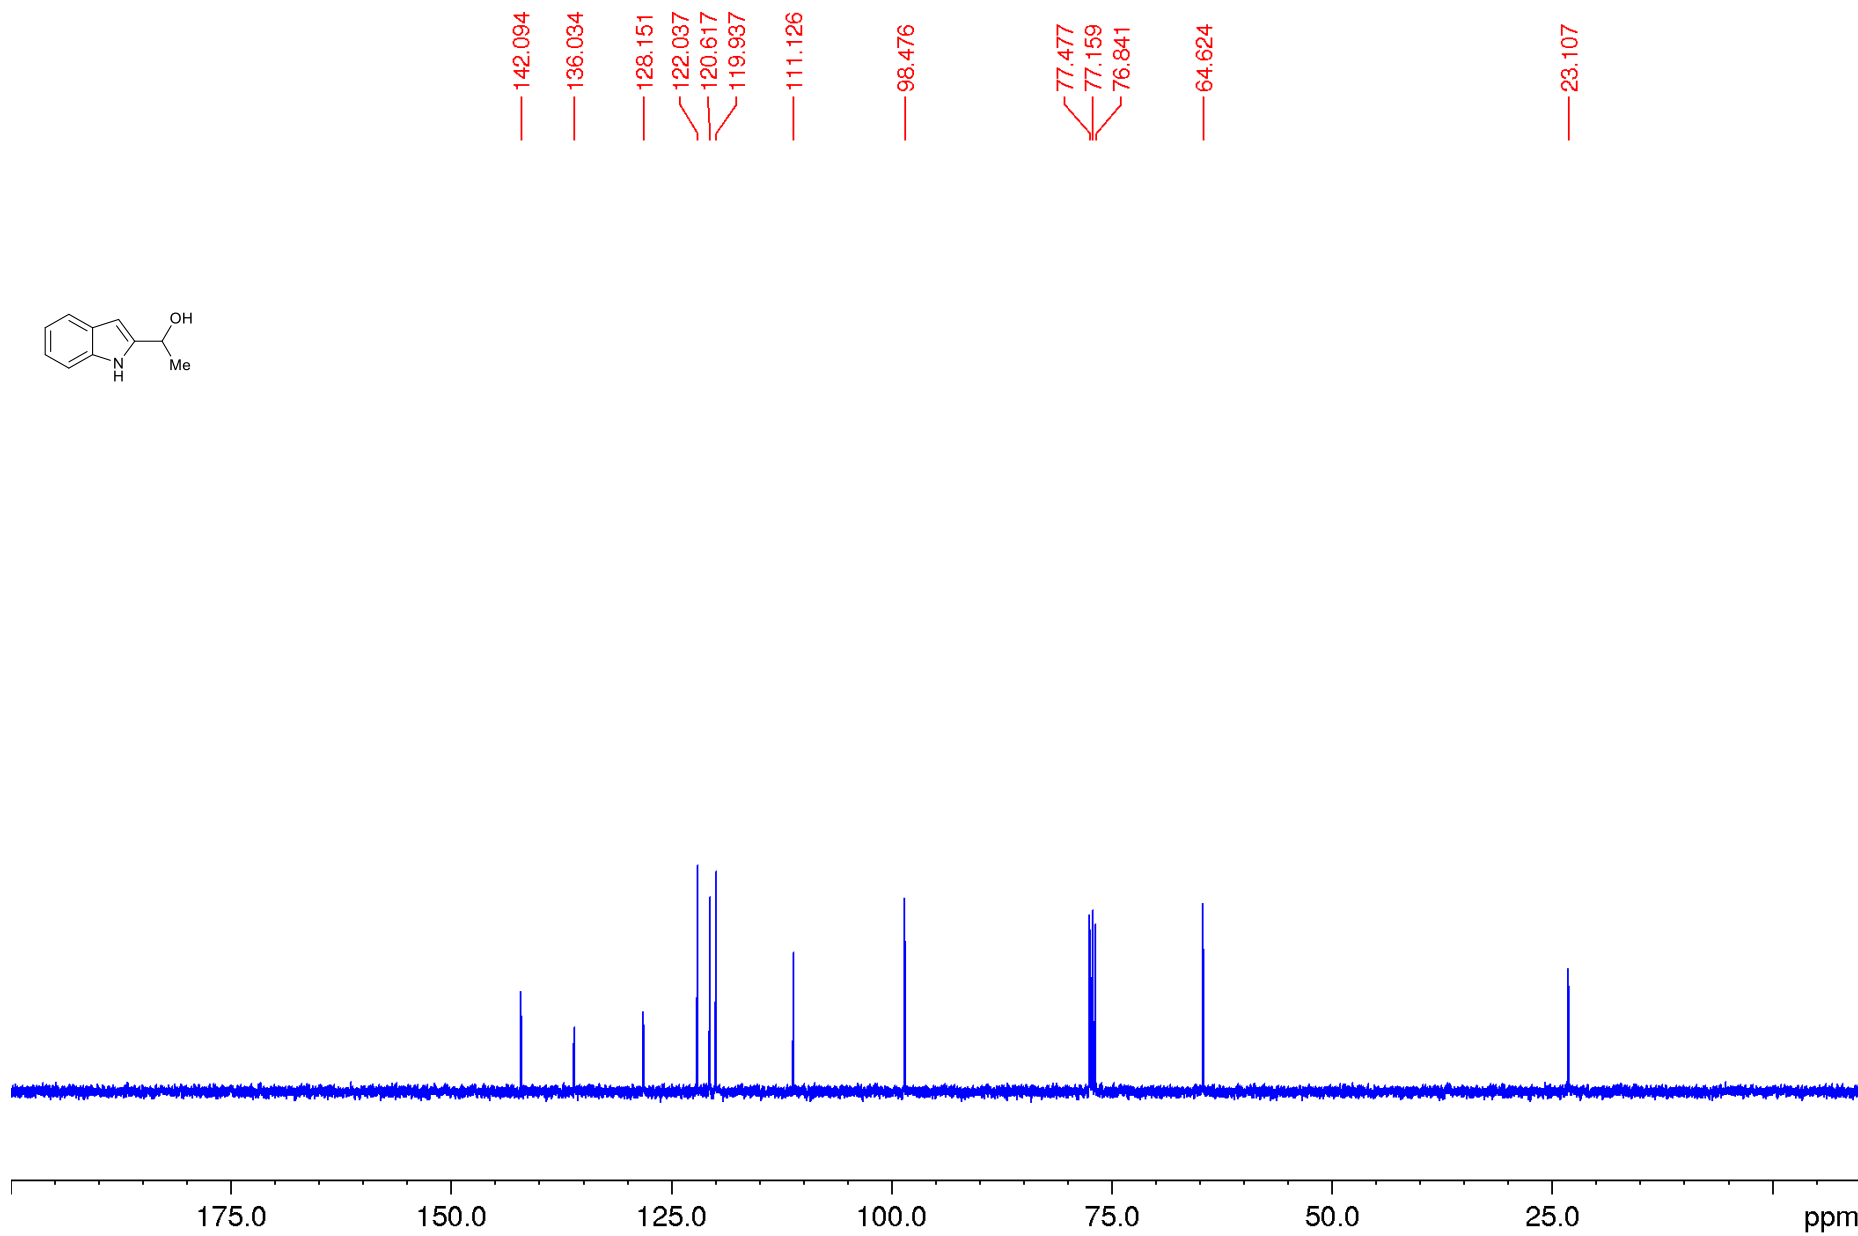

# DEPT 135 NMR-spectrum (CDCl<sub>3</sub>)

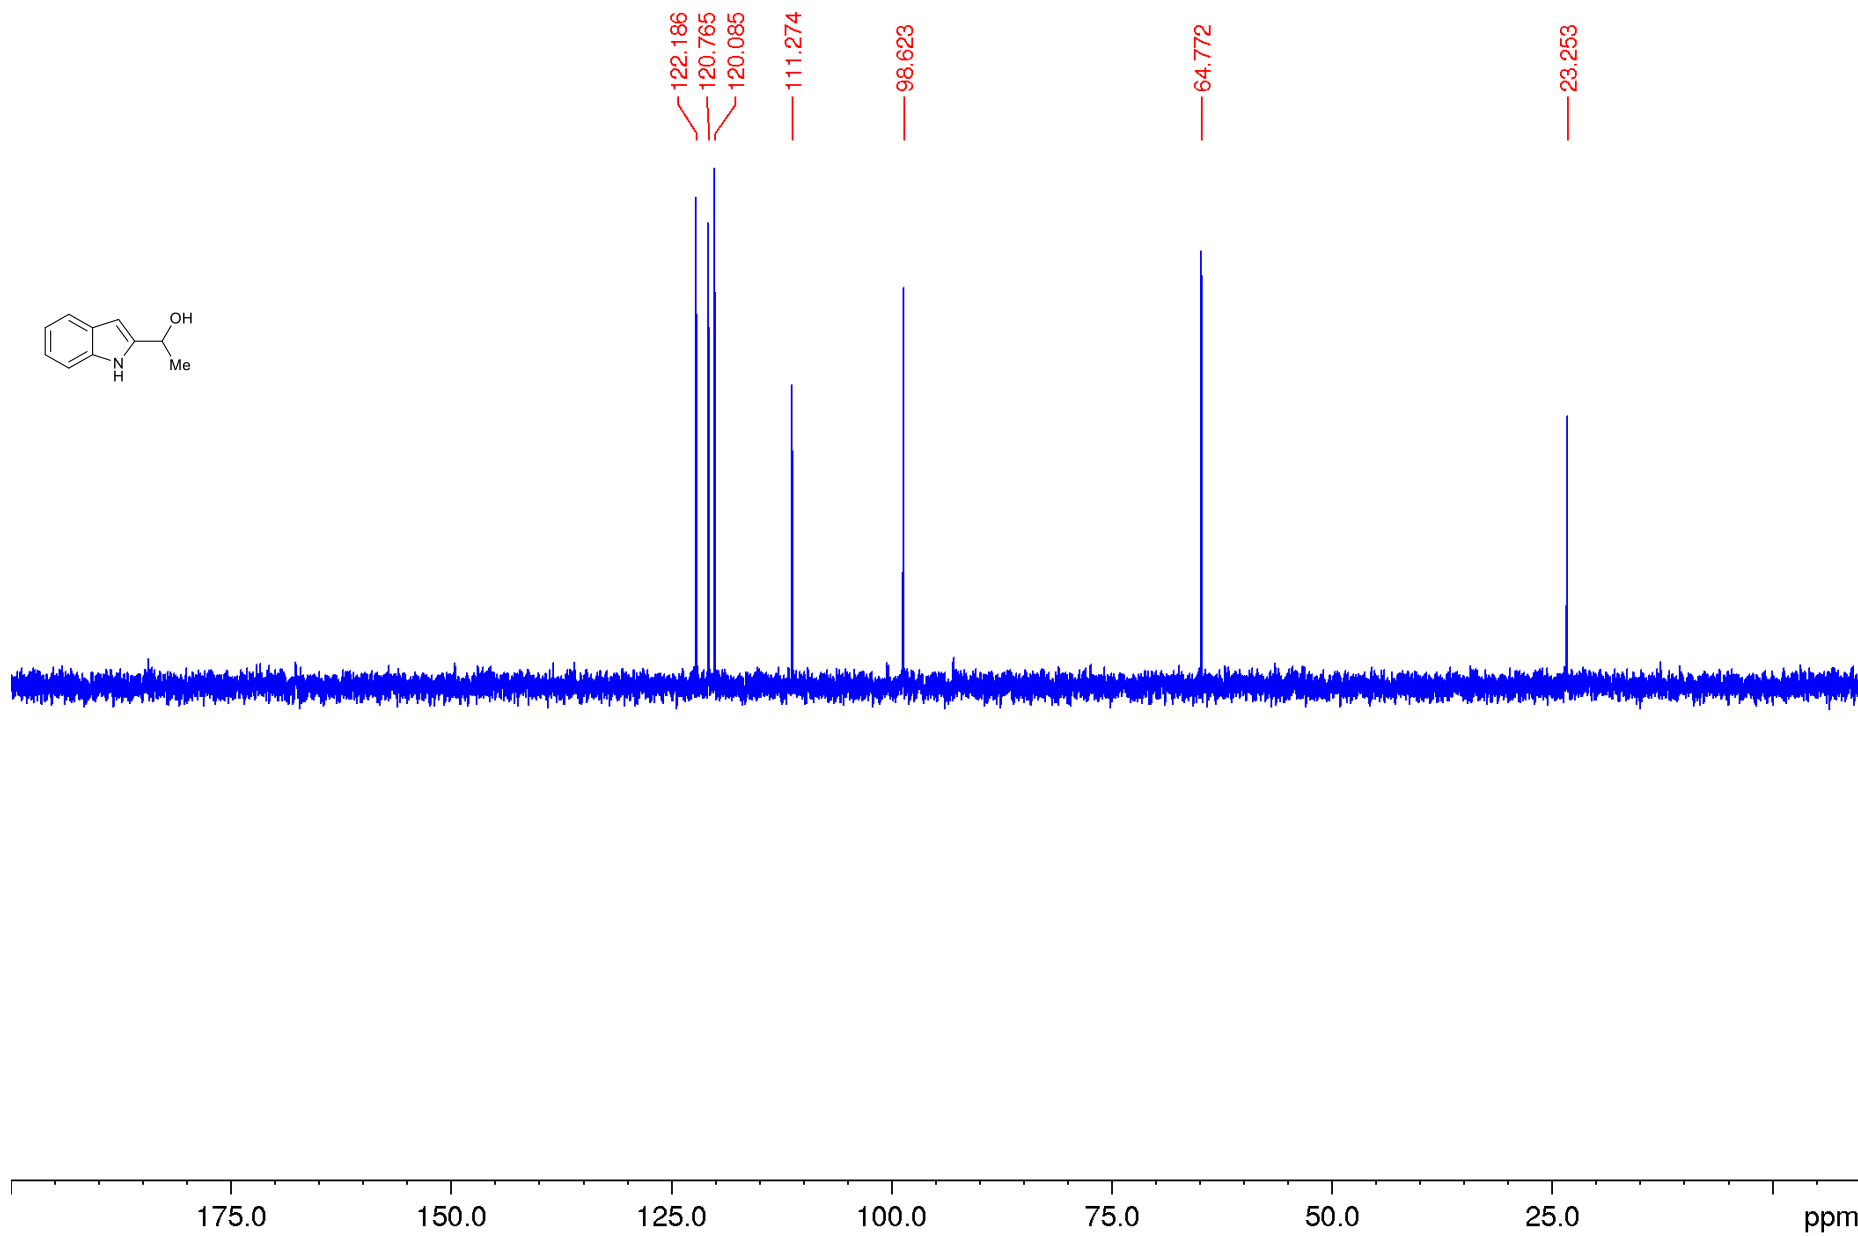

$^1\text{H}$  NMR-spectrum (400 MHz,  $\text{CDCl}_3$ )

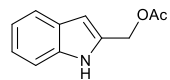

1a

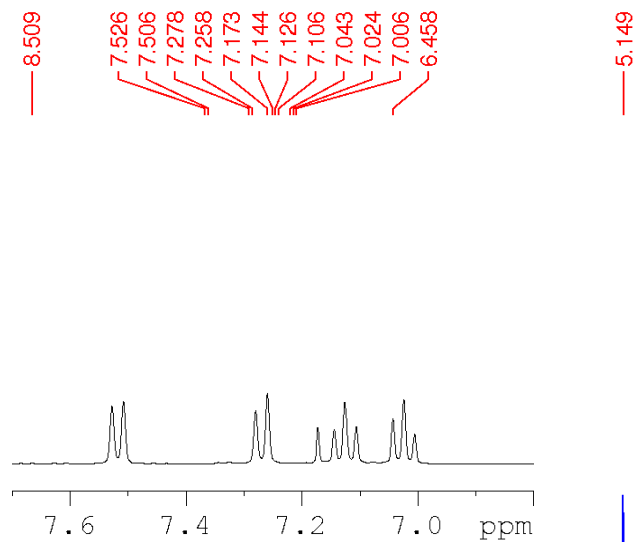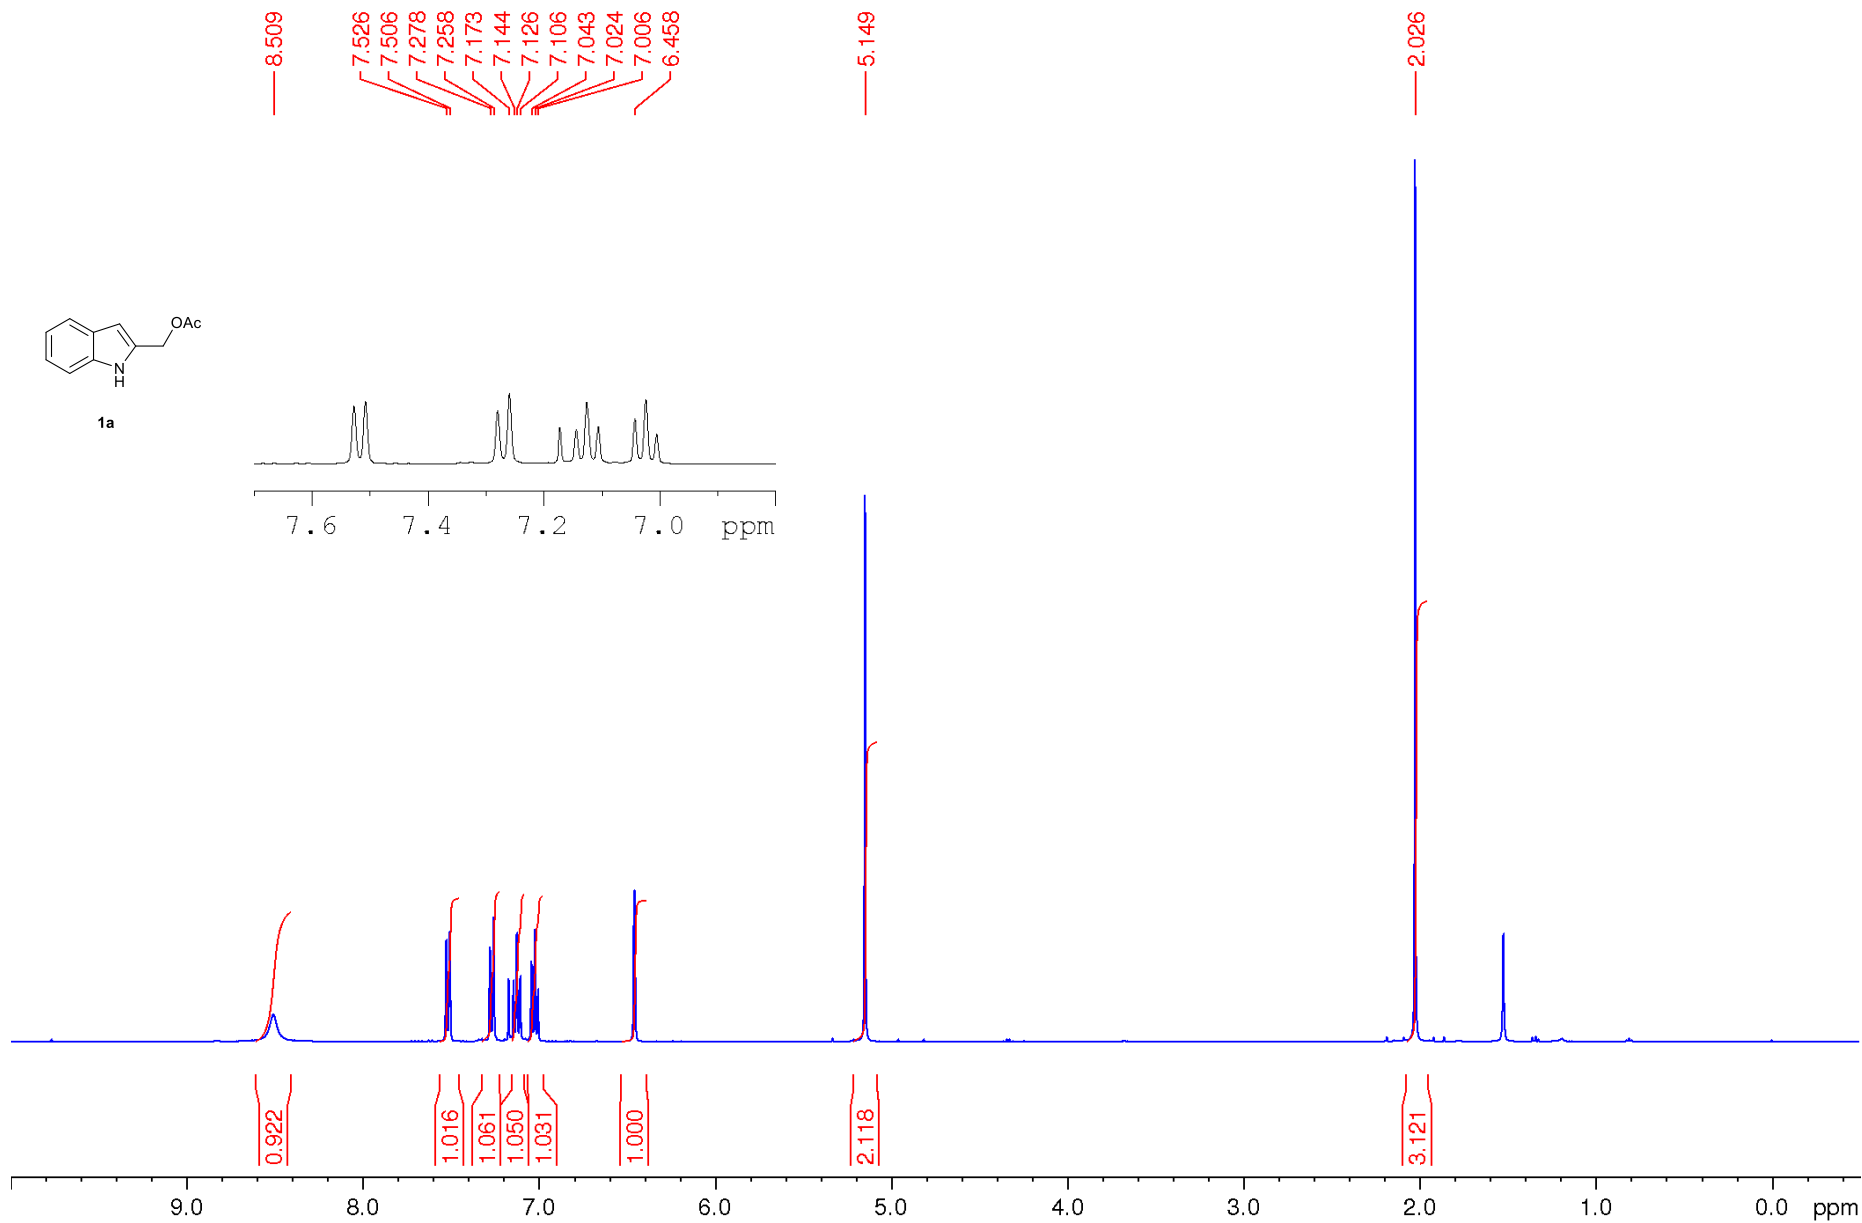

$^{13}\text{C}$  NMR-spectrum (100 MHz,  $\text{CDCl}_3$ )

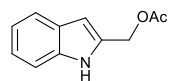

**1a**

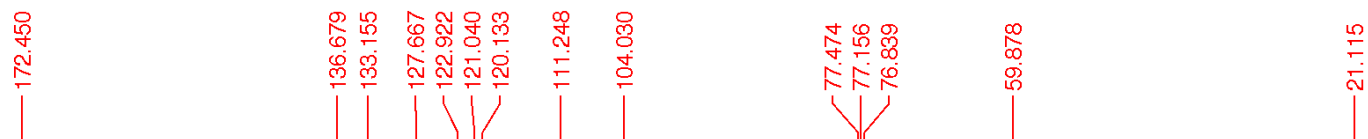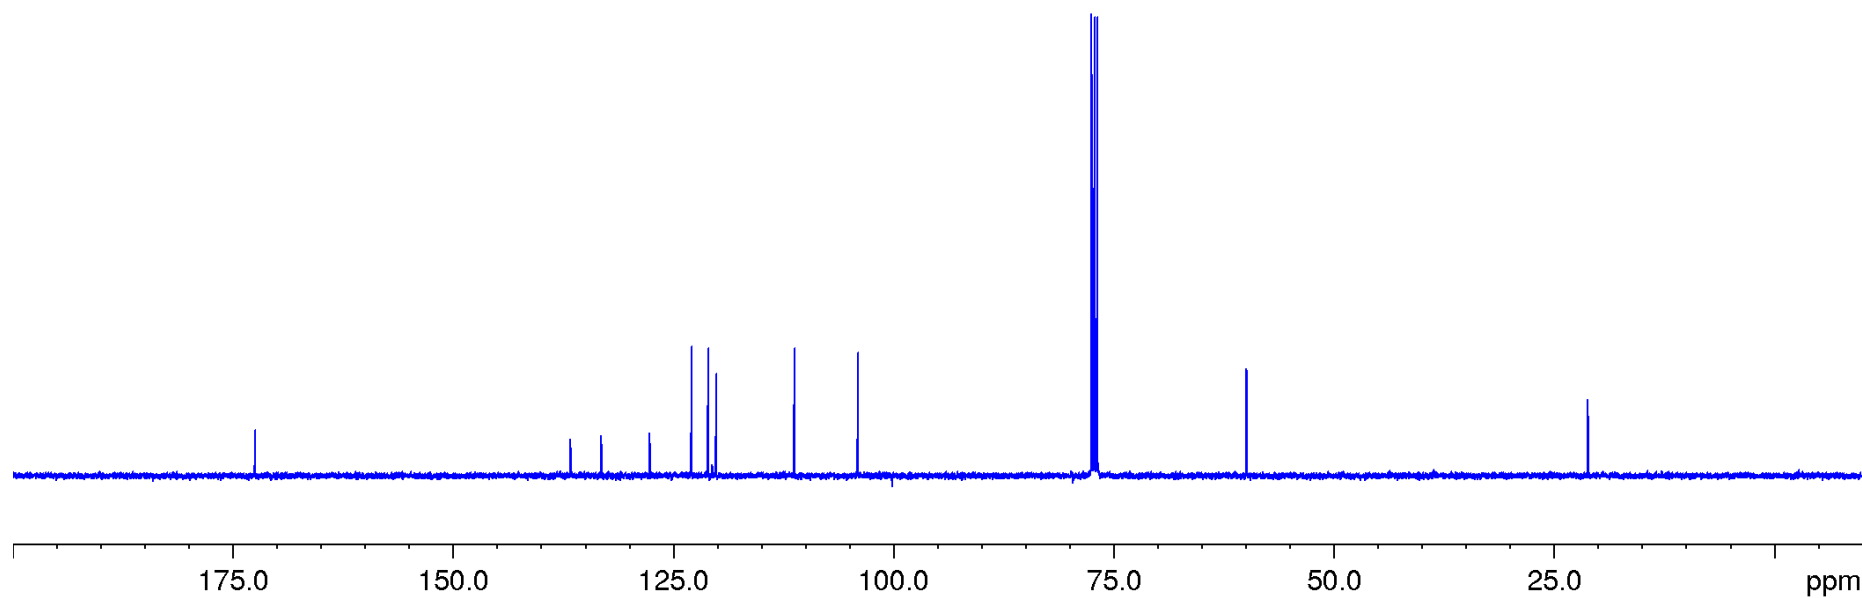

# DEPT 135 NMR-spectrum ( $\text{CDCl}_3$ )

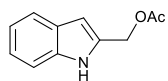

1a

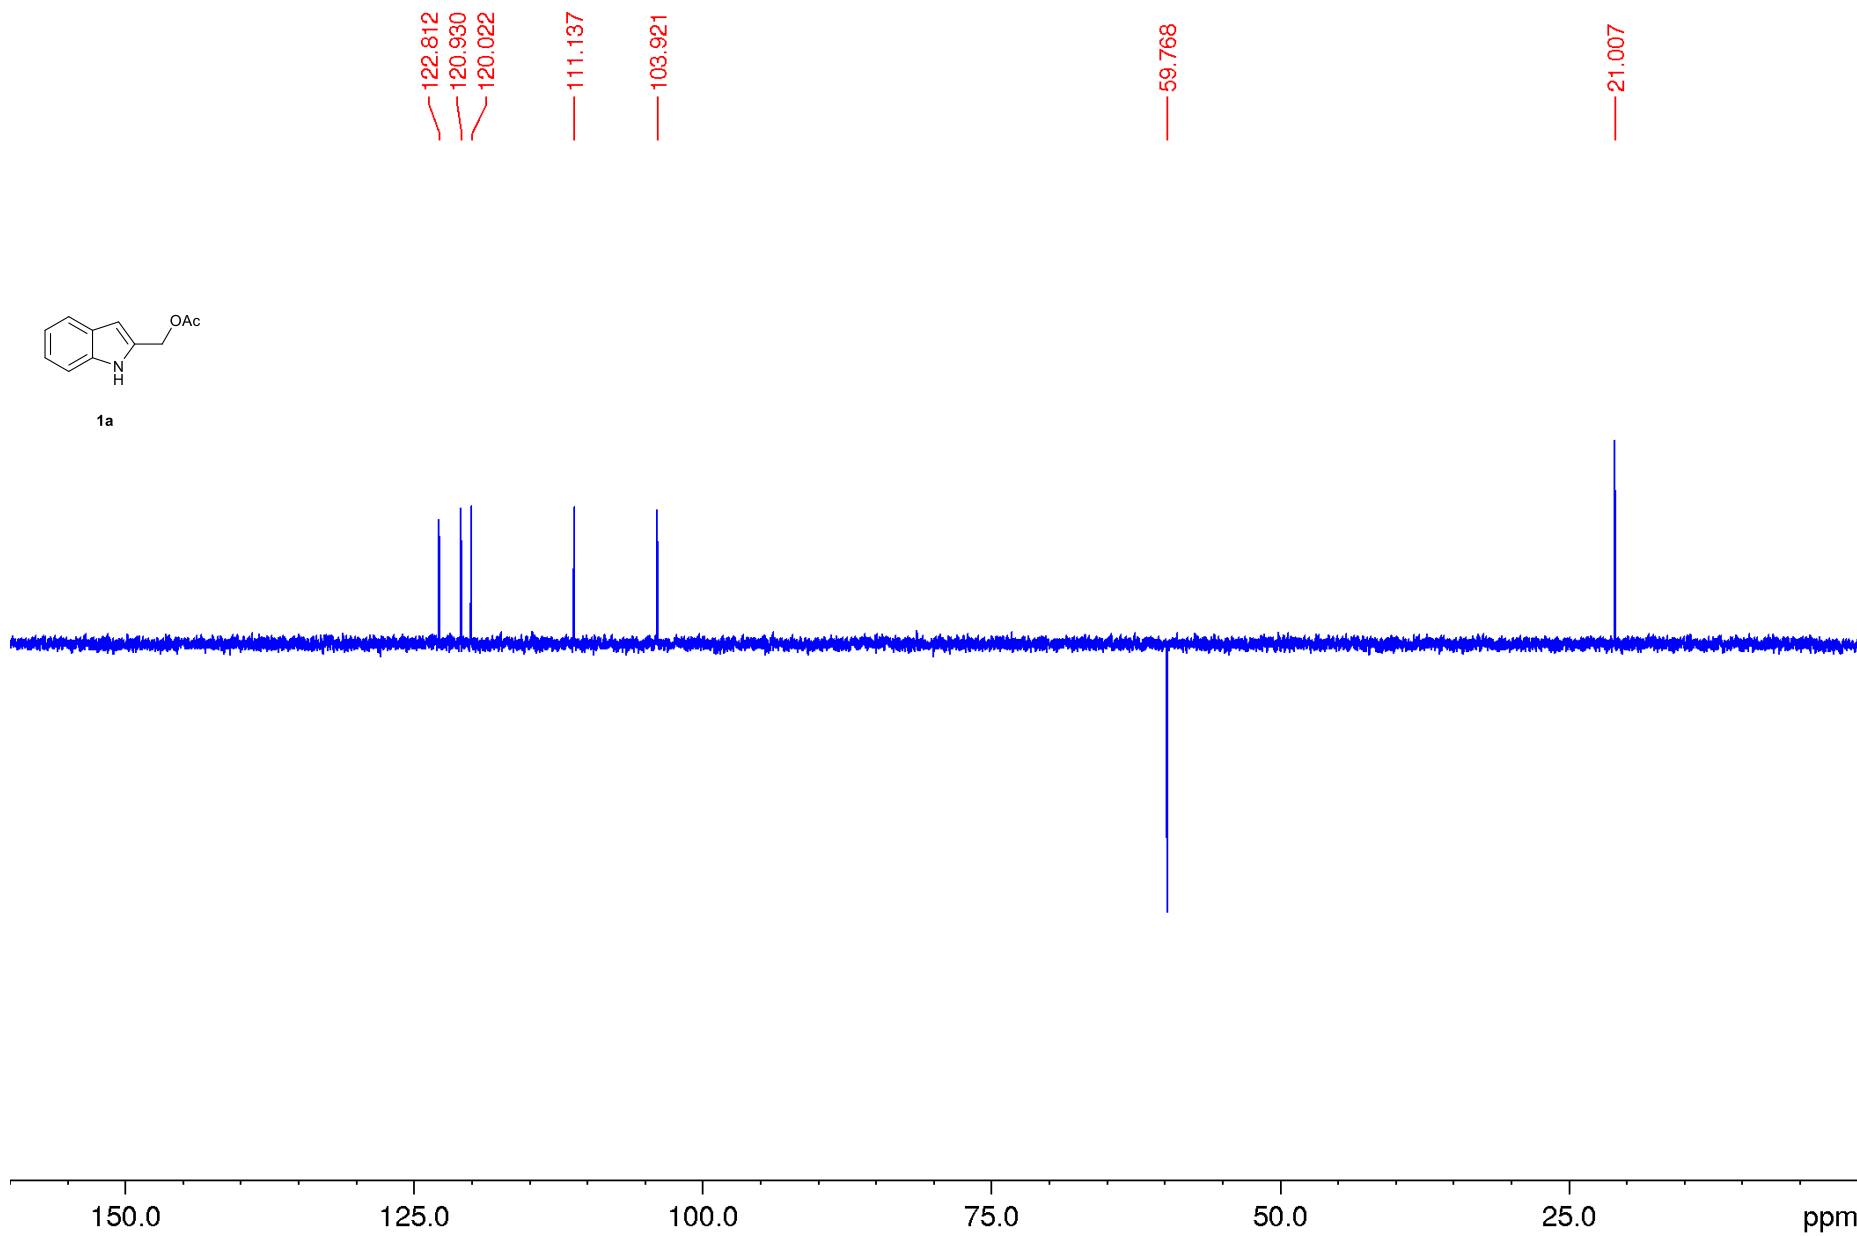

$^1\text{H}$  NMR-spectrum (400 MHz,  $\text{CDCl}_3$ )

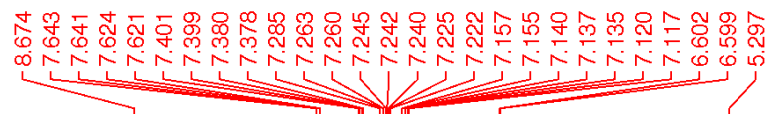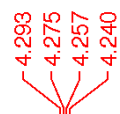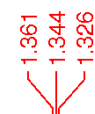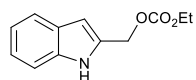

**1b**

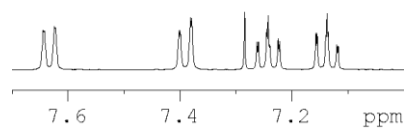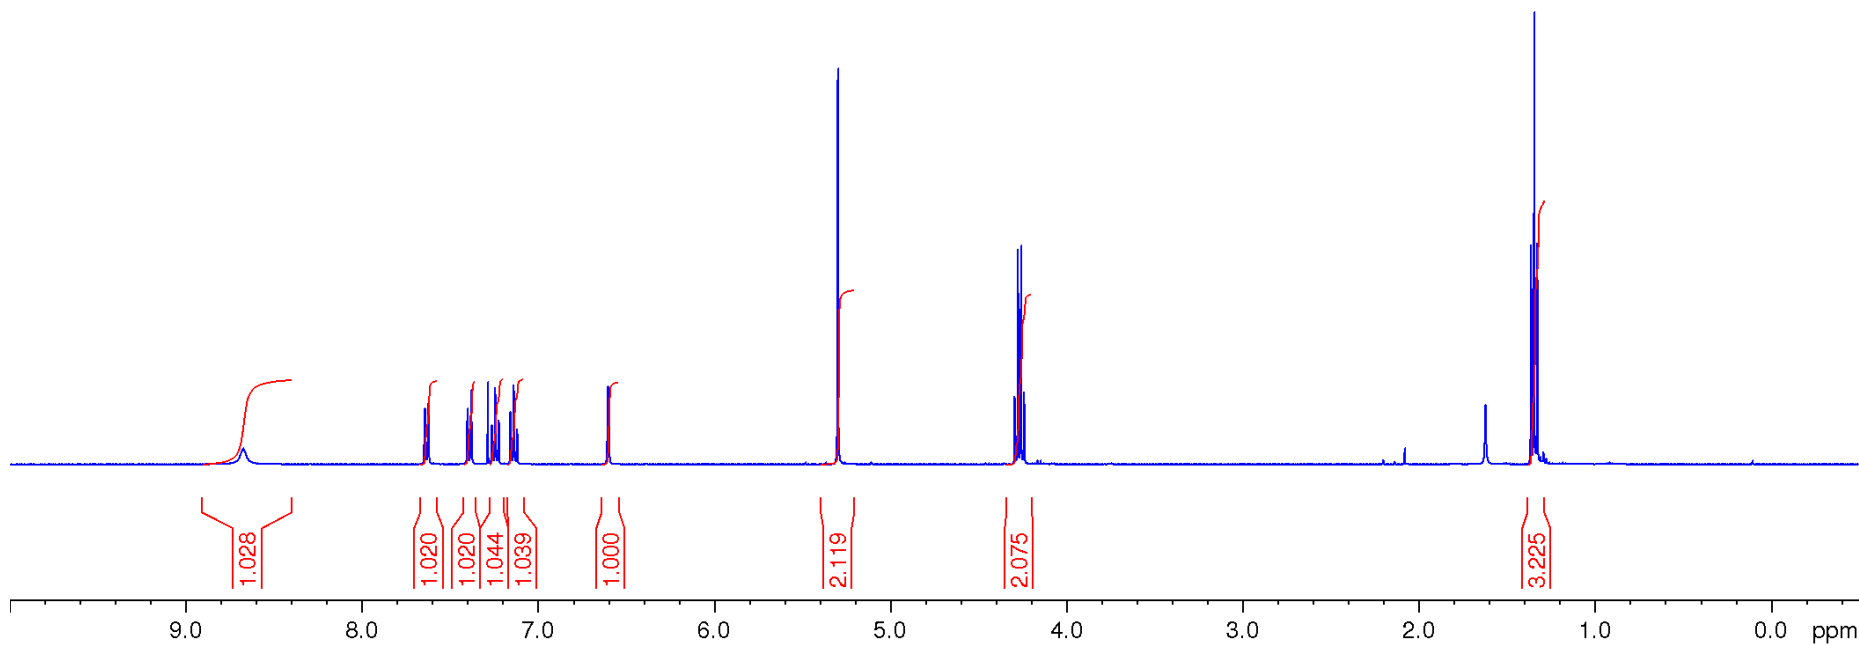

$^{13}\text{C}$  NMR-spectrum (100 MHz,  $\text{CDCl}_3$ )

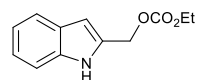

**1b**

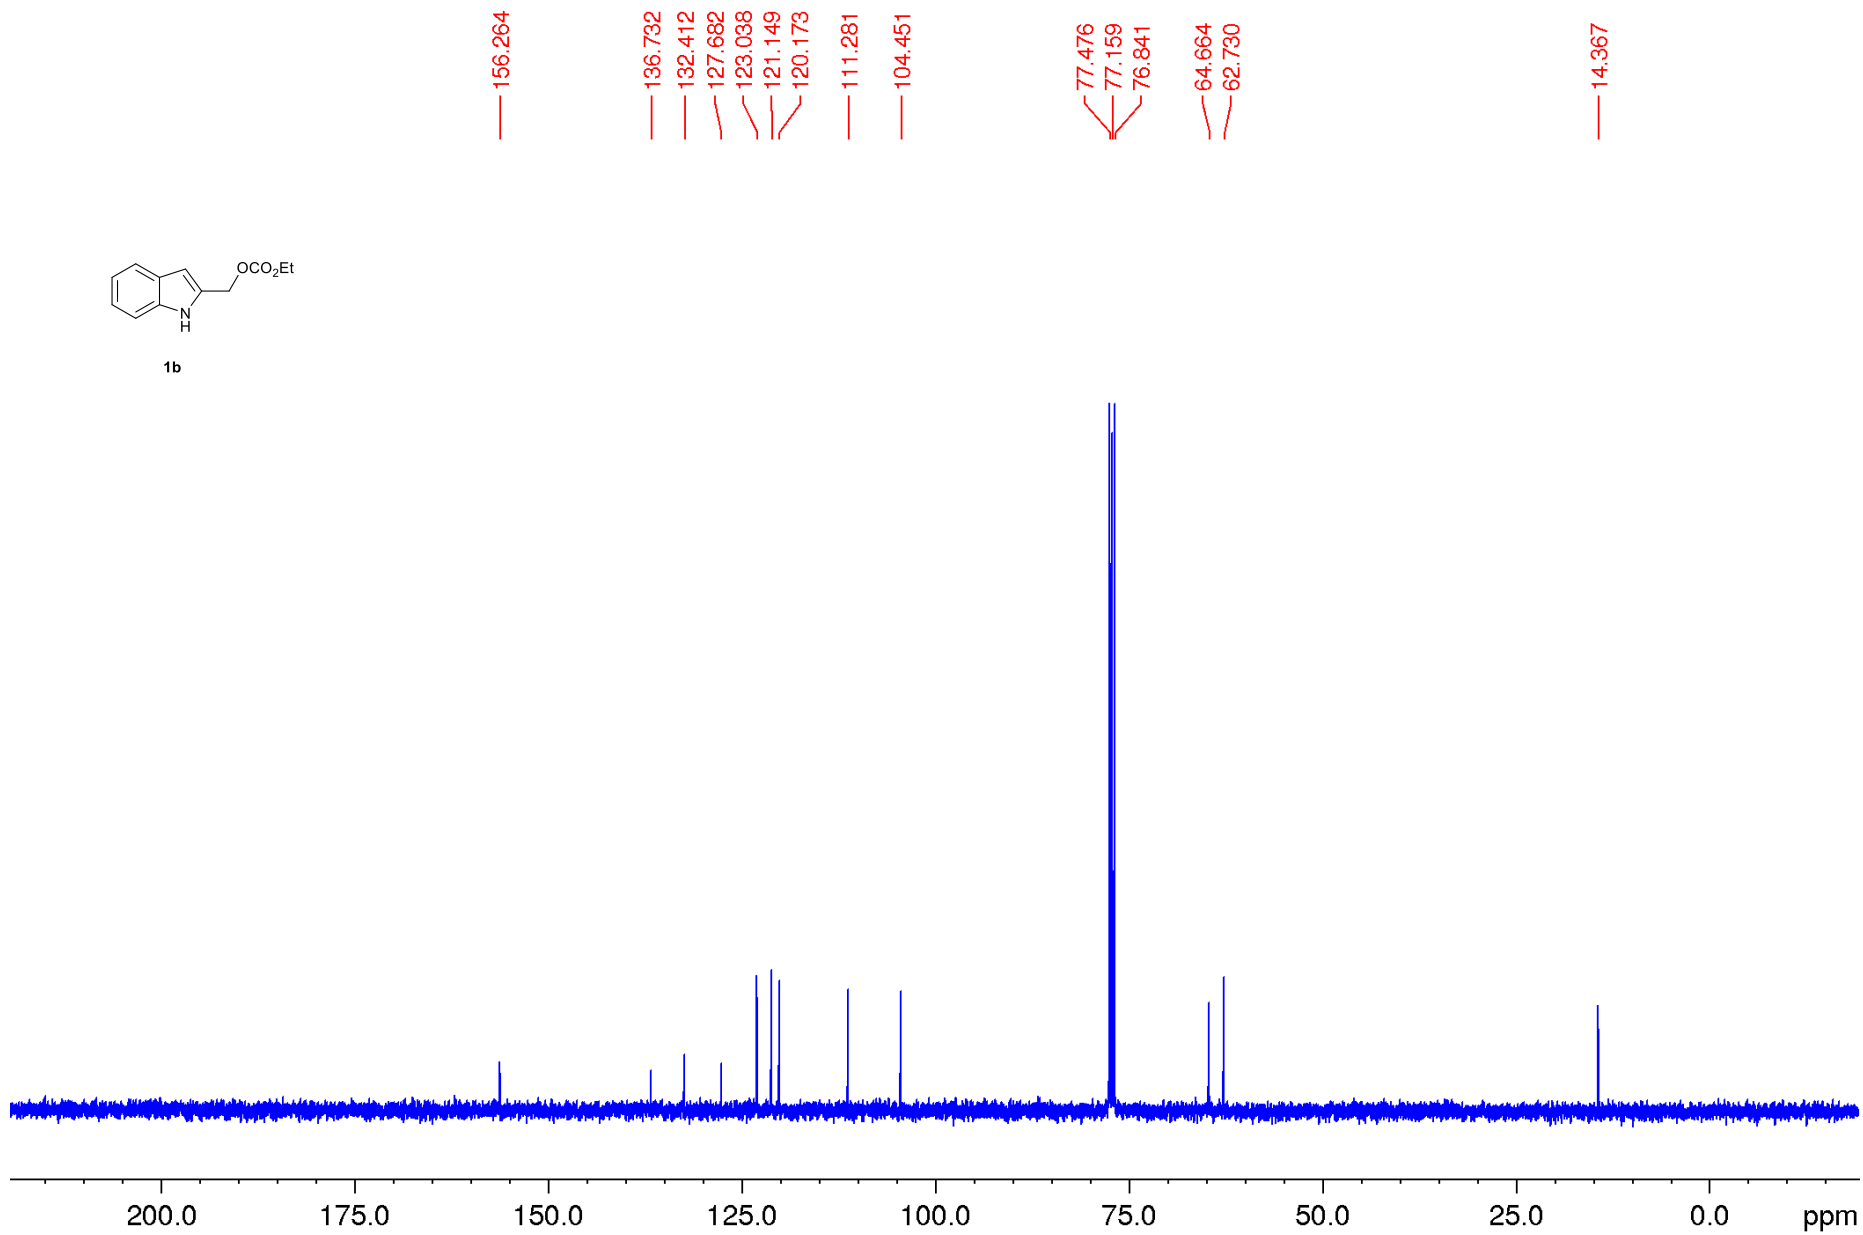

DEPT 135 NMR-spectrum (CDCl<sub>3</sub>)

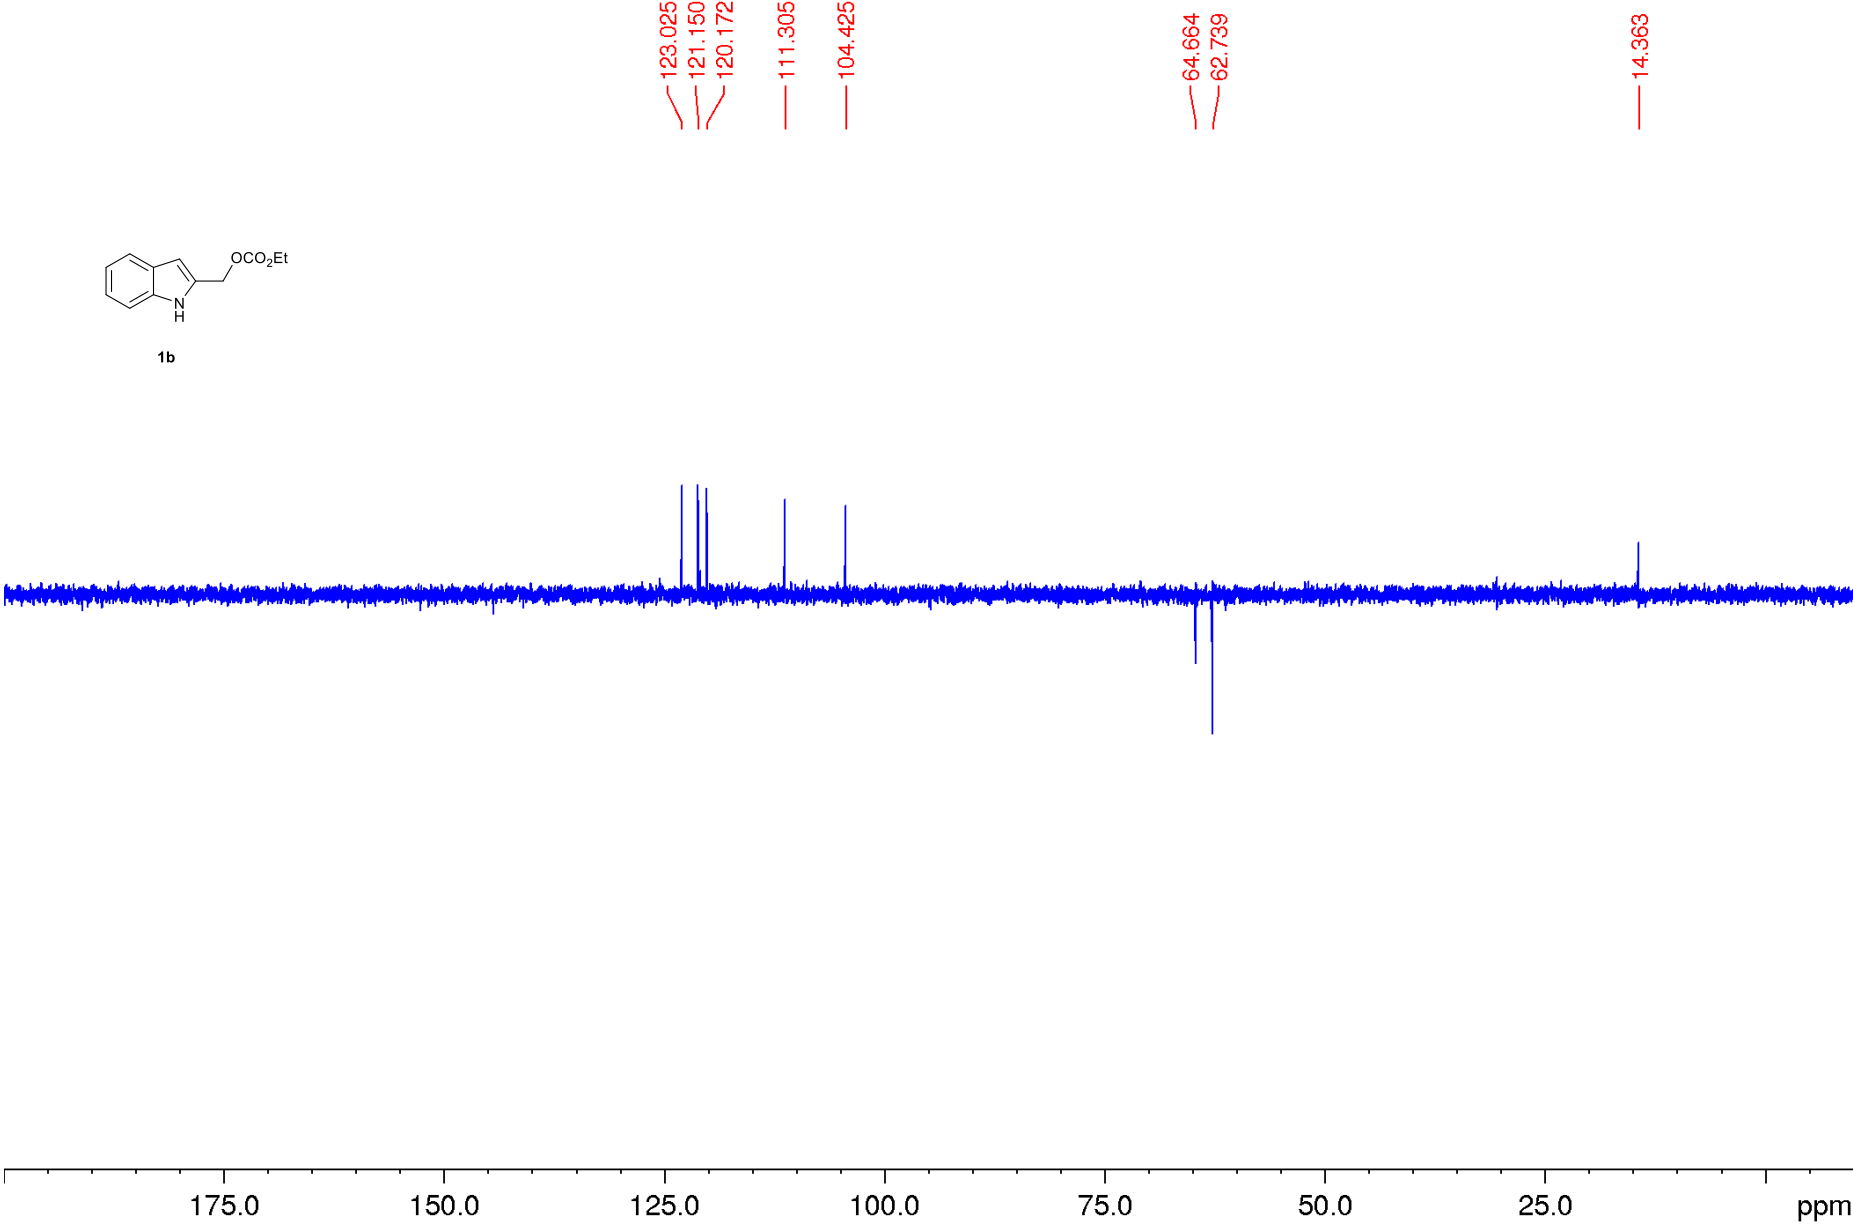



$^1\text{H}$  NMR-spectrum (400 MHz,  $\text{CDCl}_3$ )

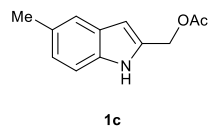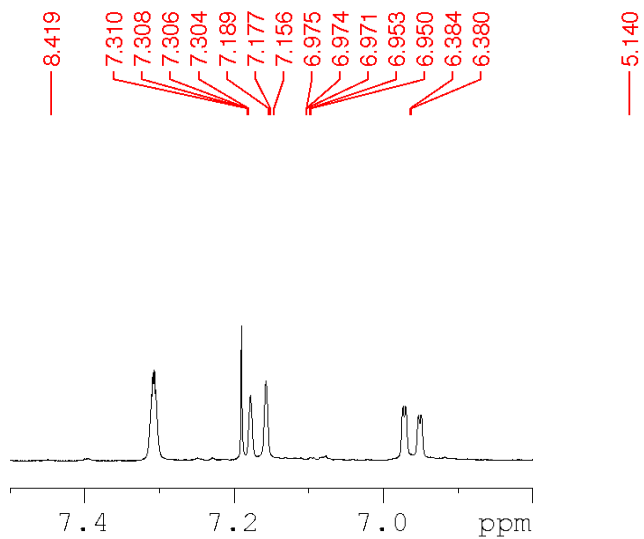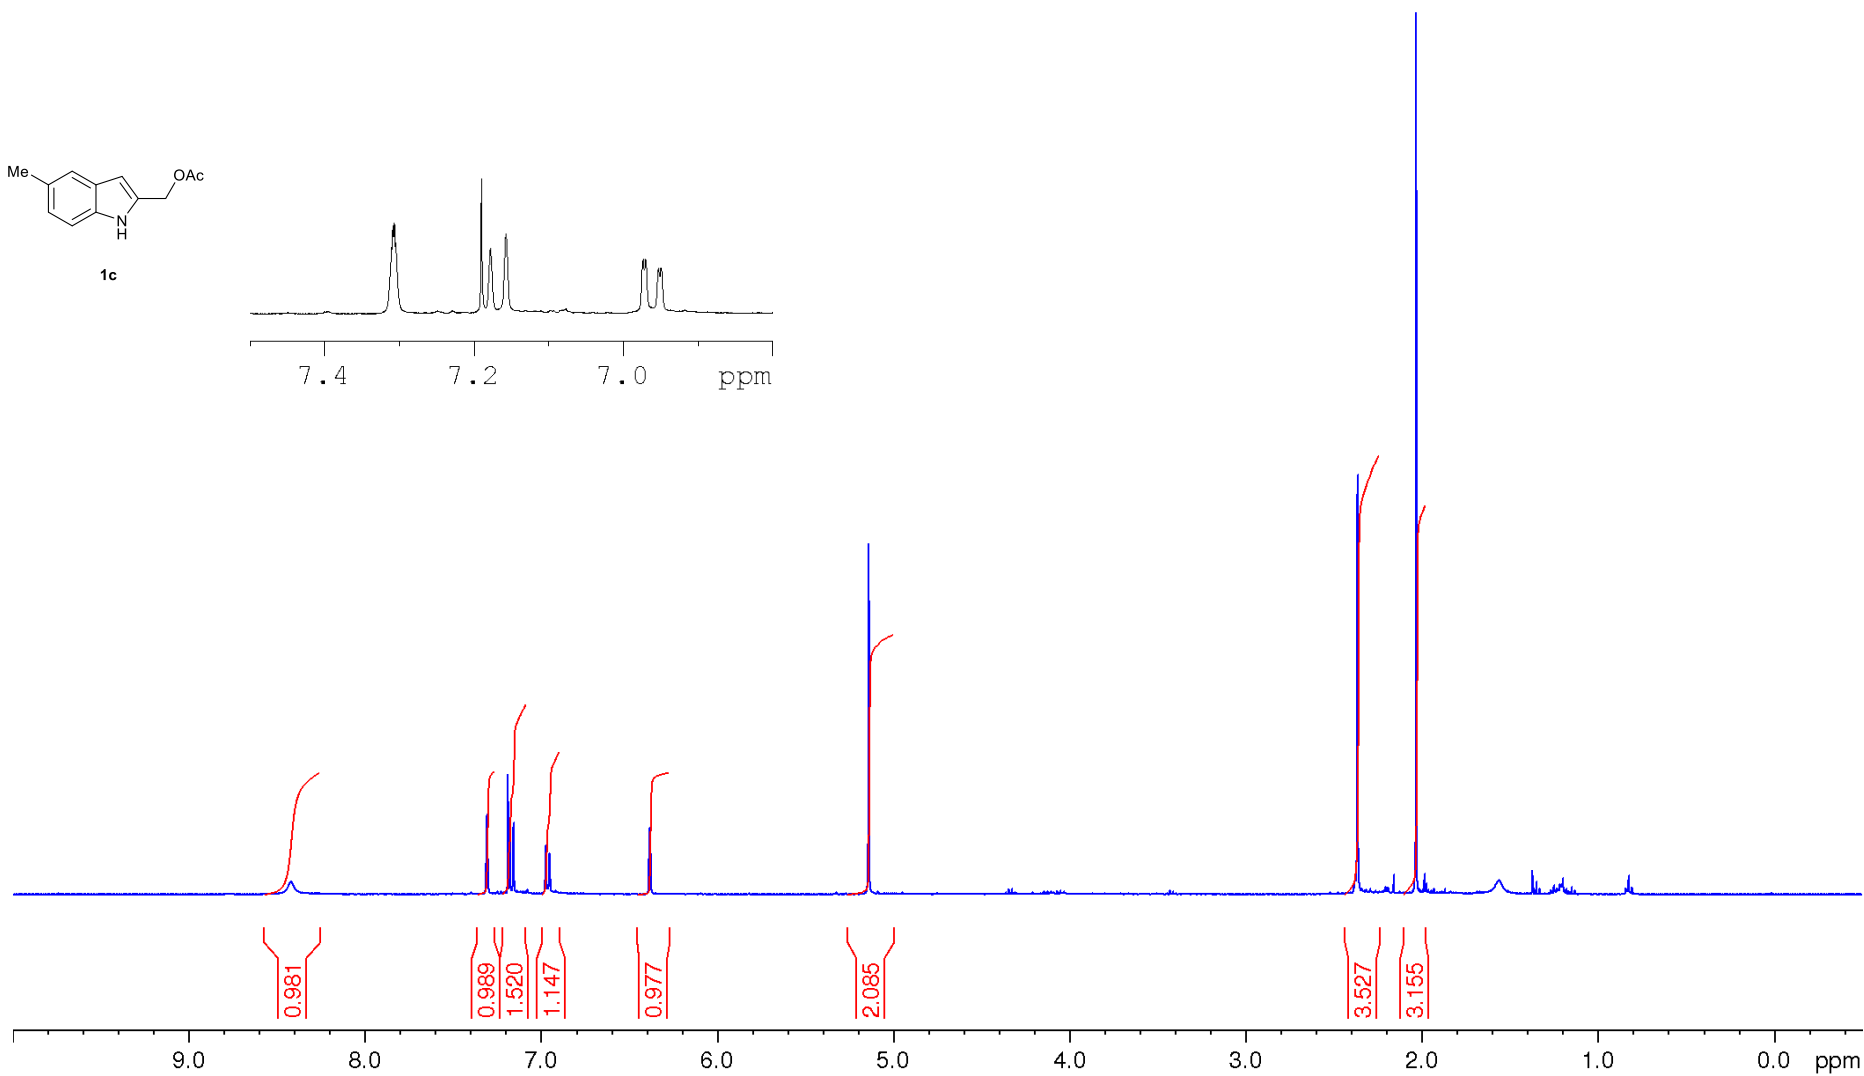

$^{13}\text{C}$  NMR-spectrum (100 MHz,  $\text{CDCl}_3$ )

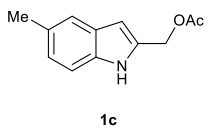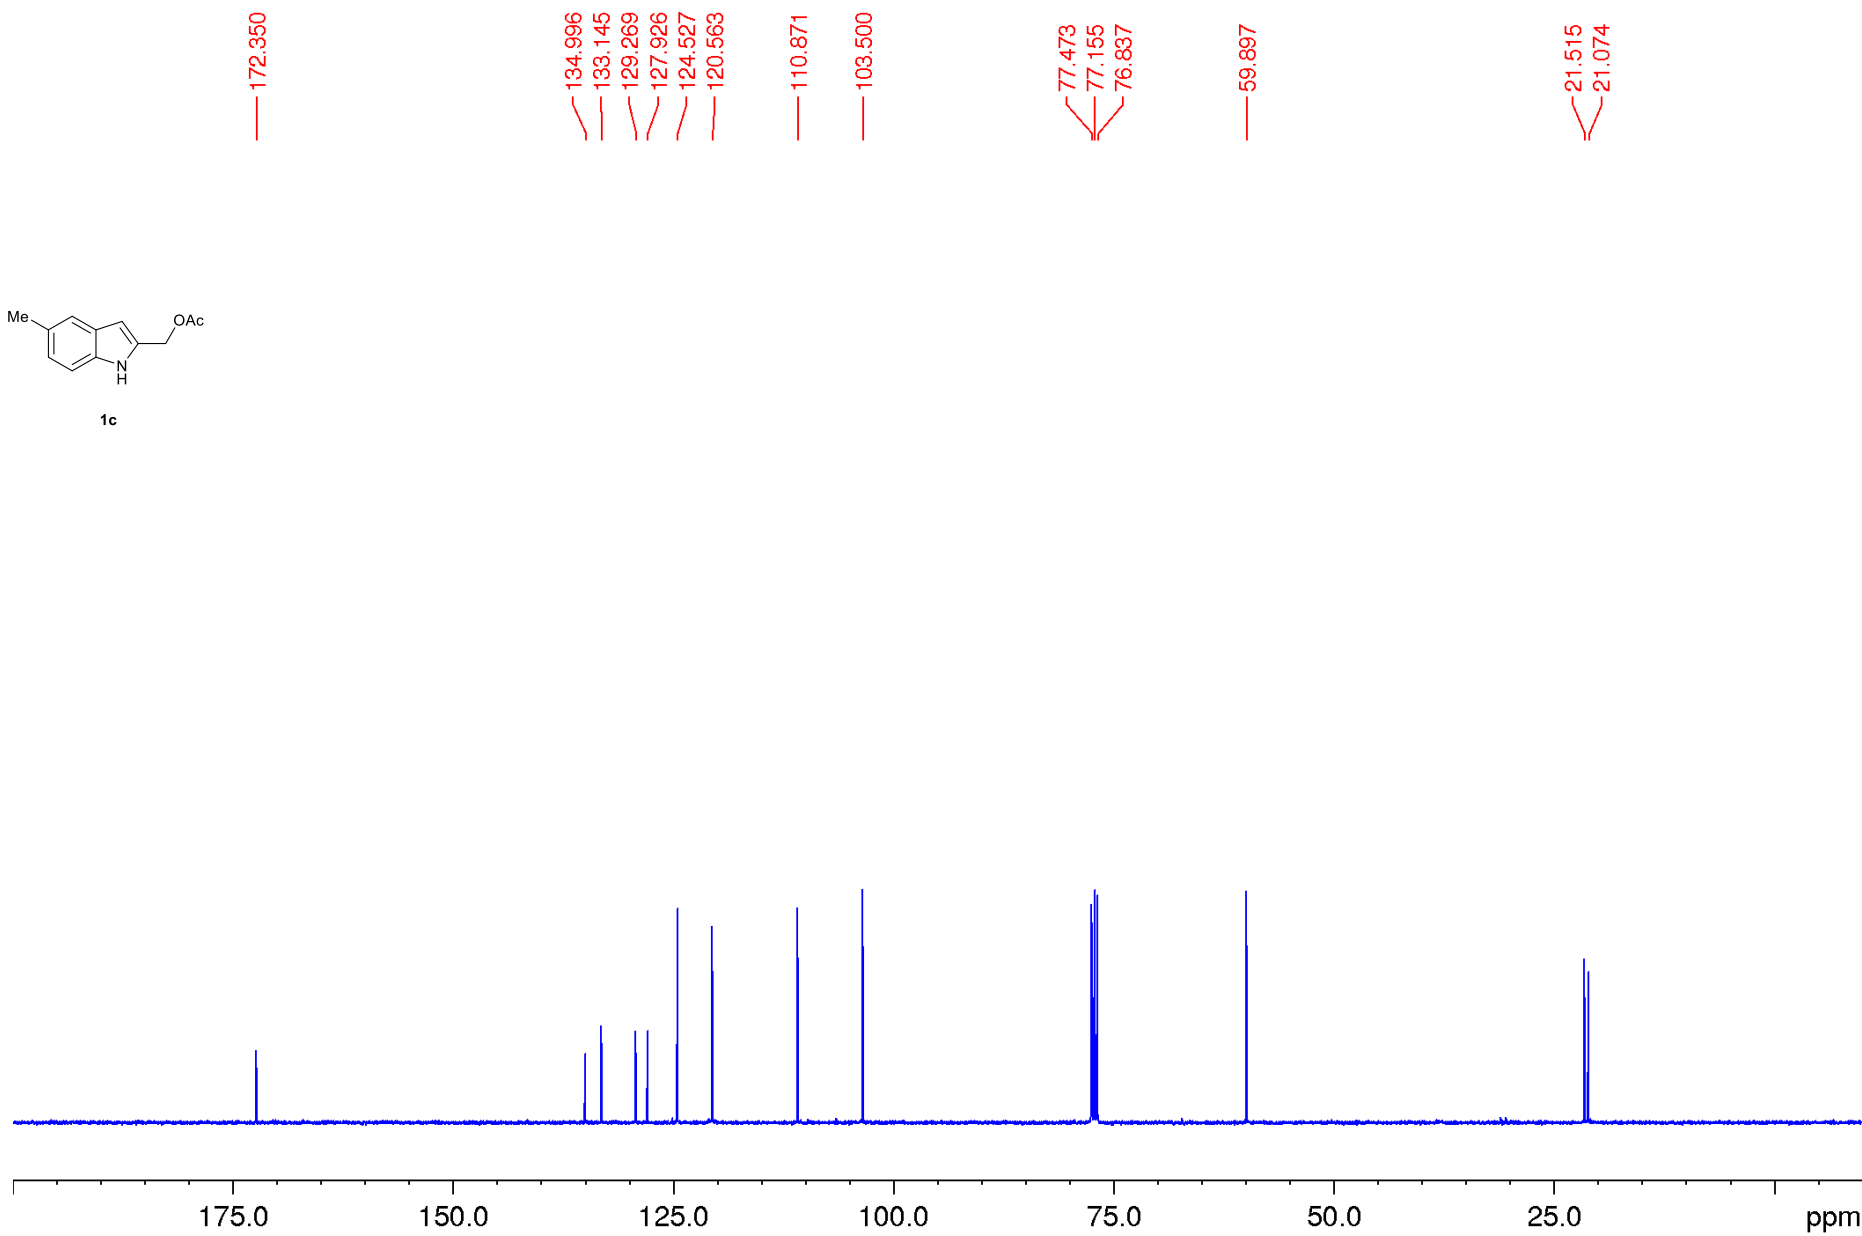

# DEPT 135 NMR-spectrum (CDCl<sub>3</sub>)

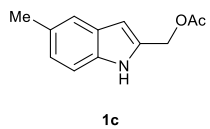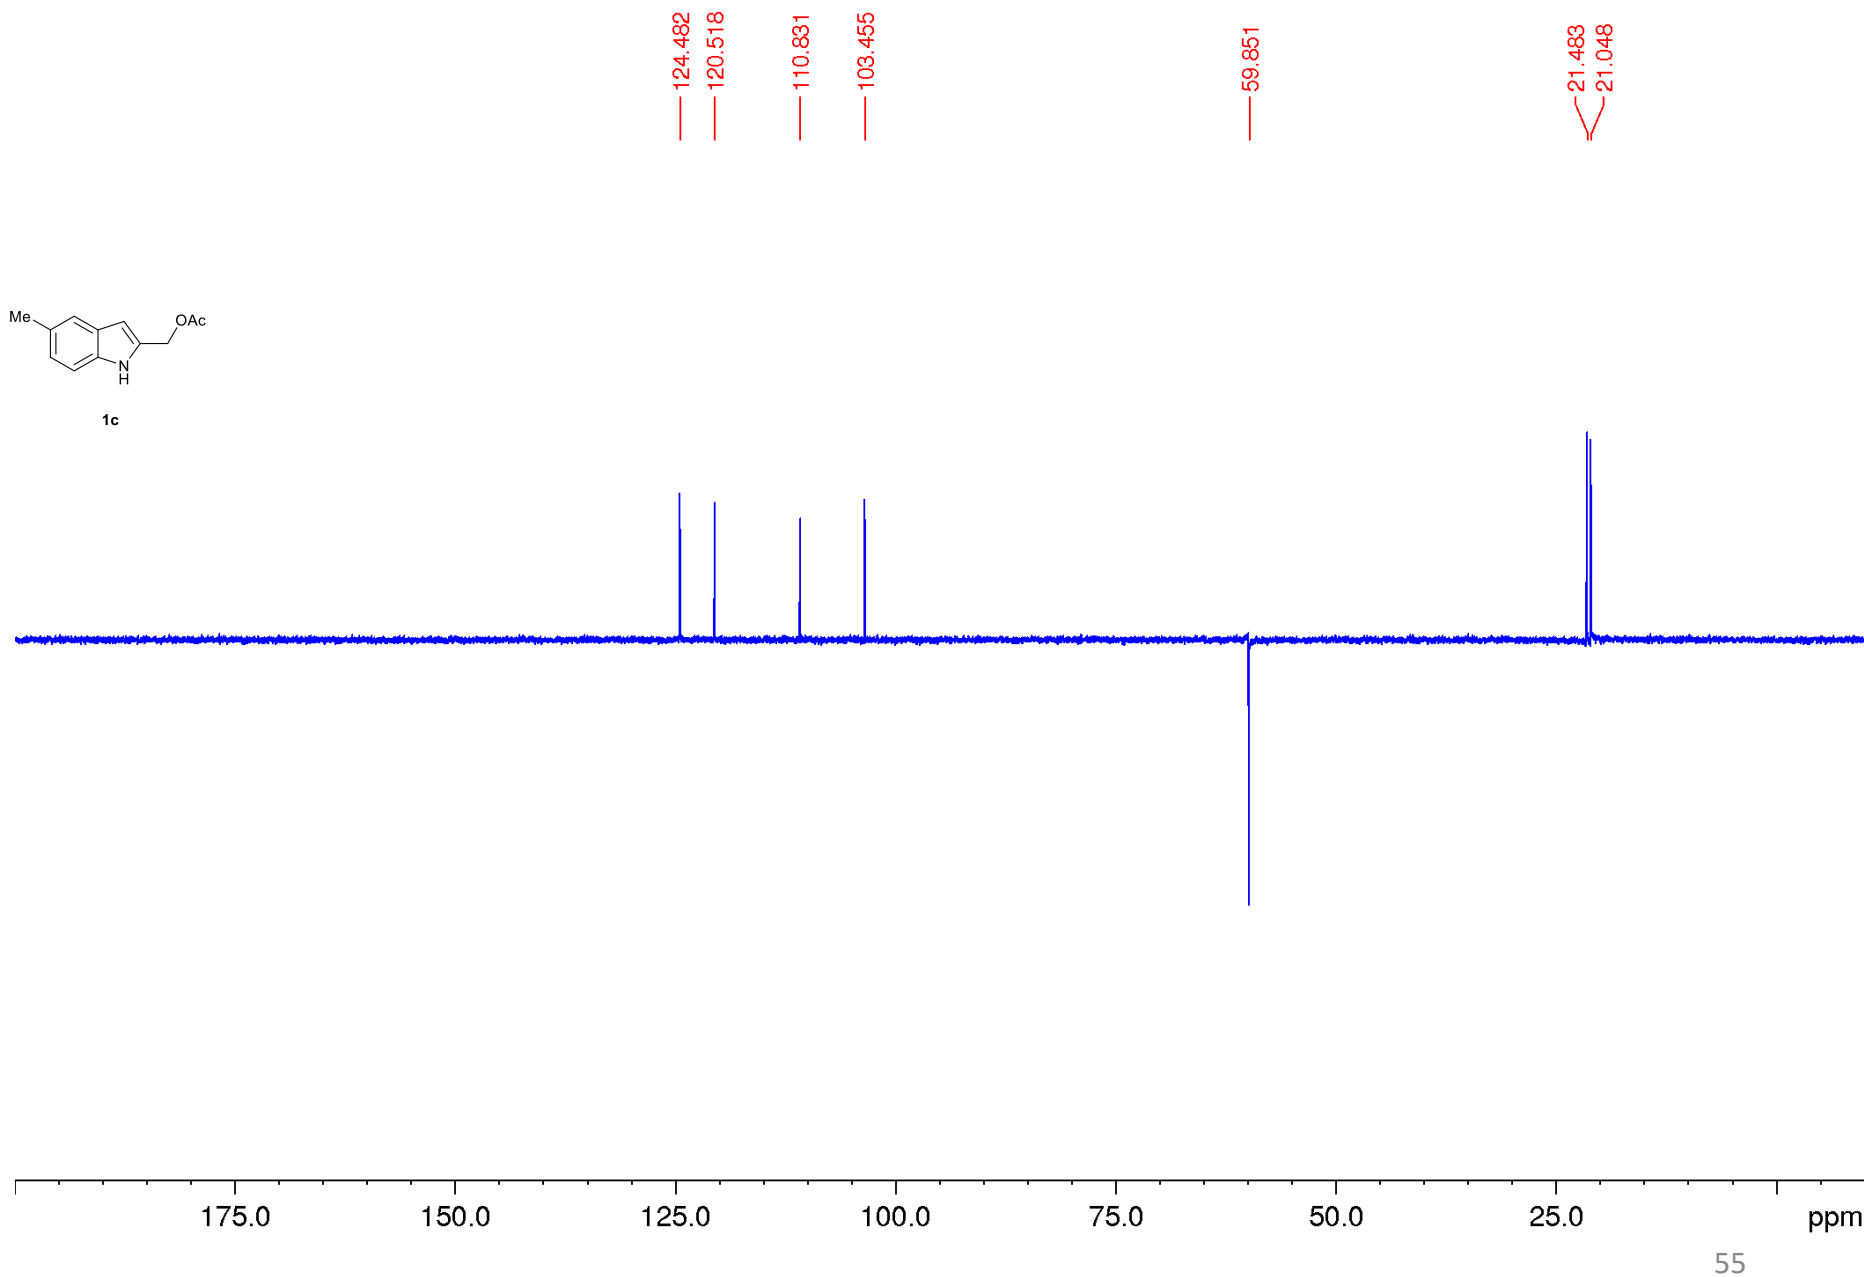

<sup>1</sup>H NMR-spectrum (400 MHz, CDCl<sub>3</sub>)

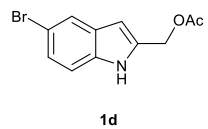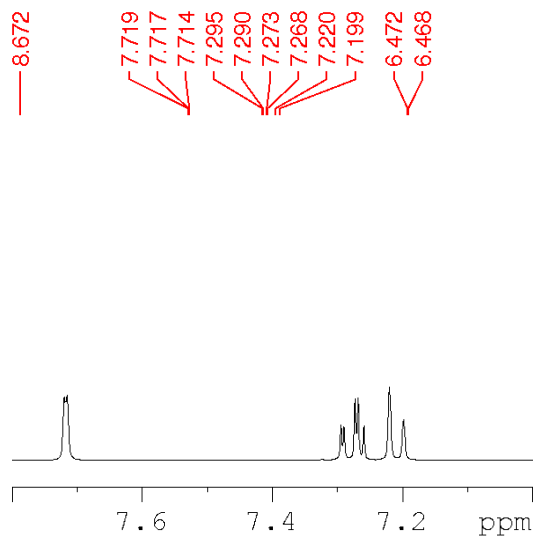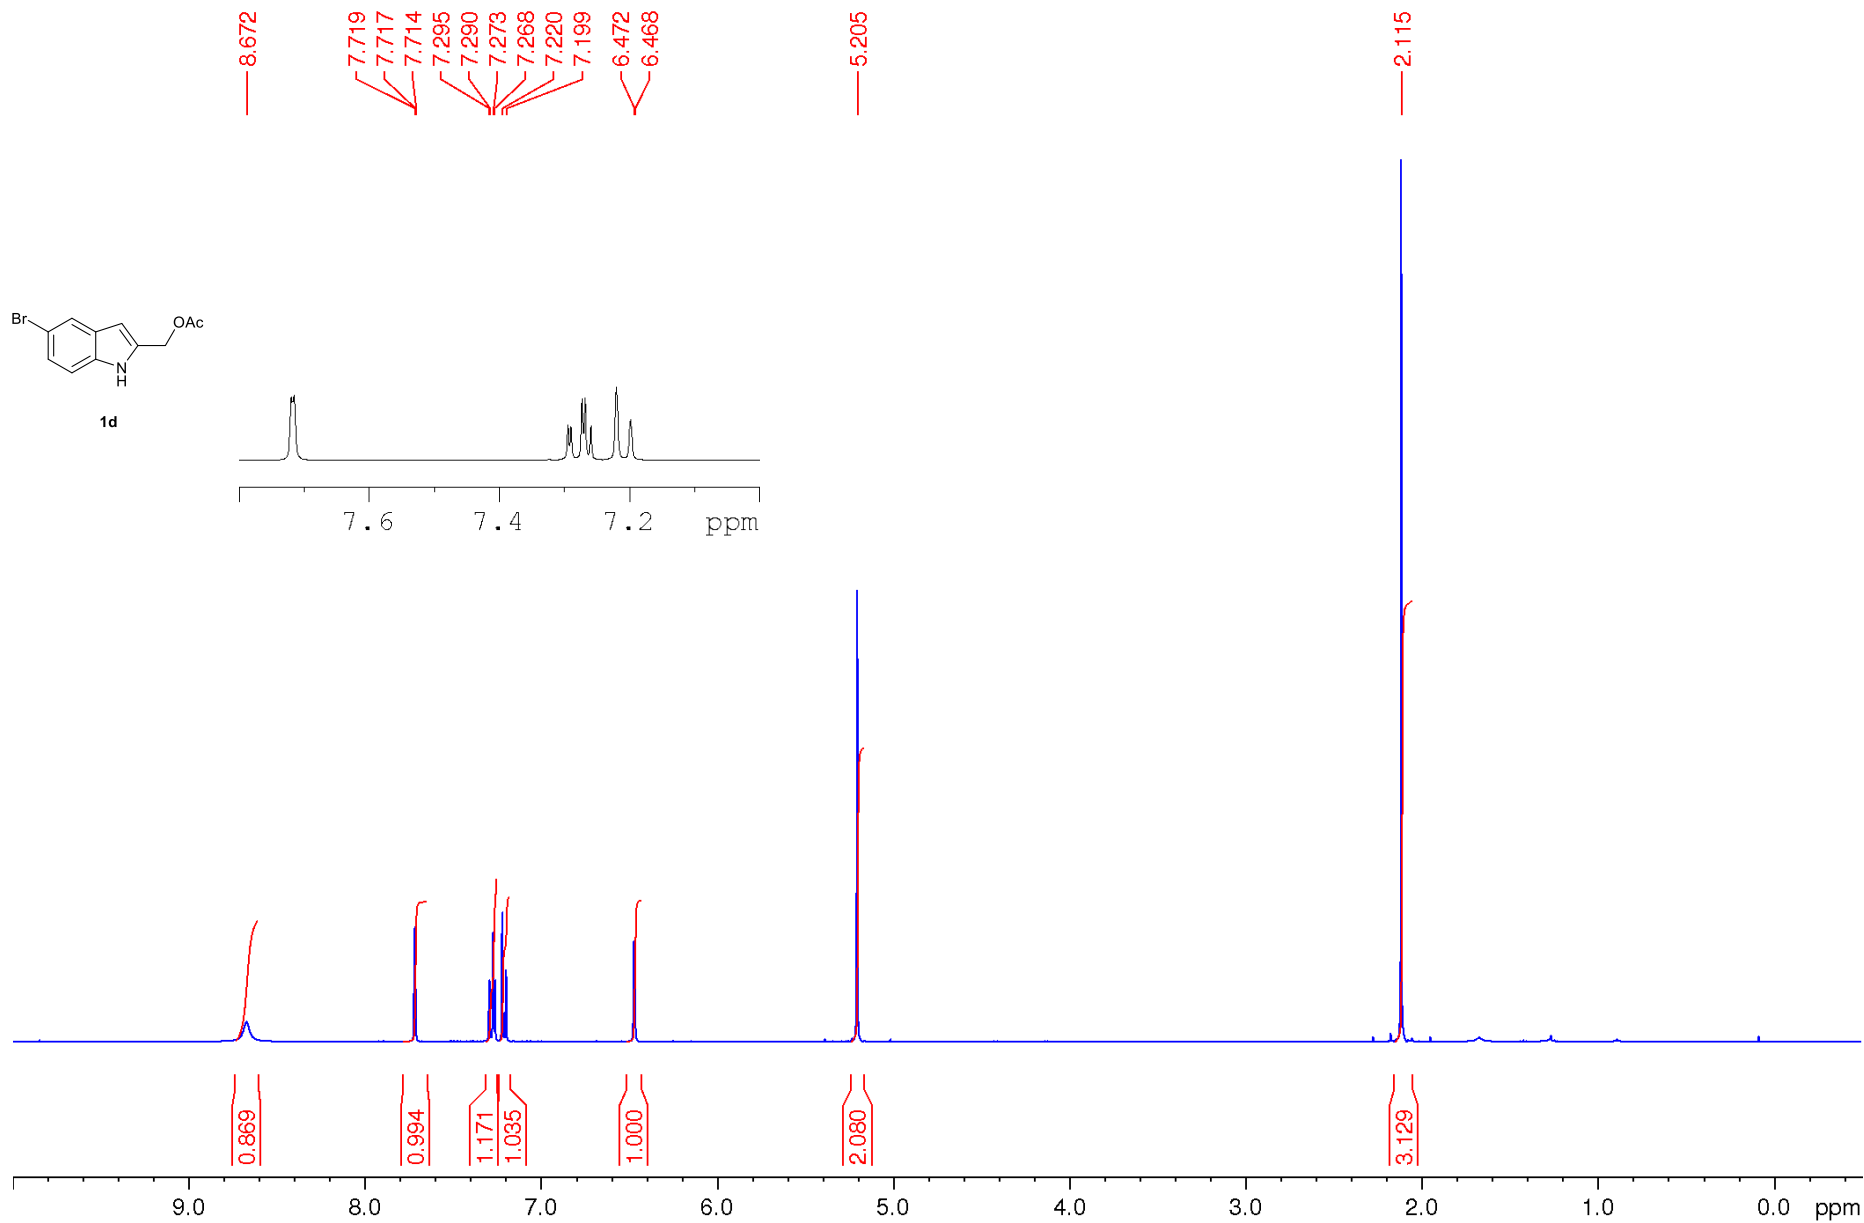

$^{13}\text{C}$  NMR-spectrum (100 MHz,  $\text{CDCl}_3$ )

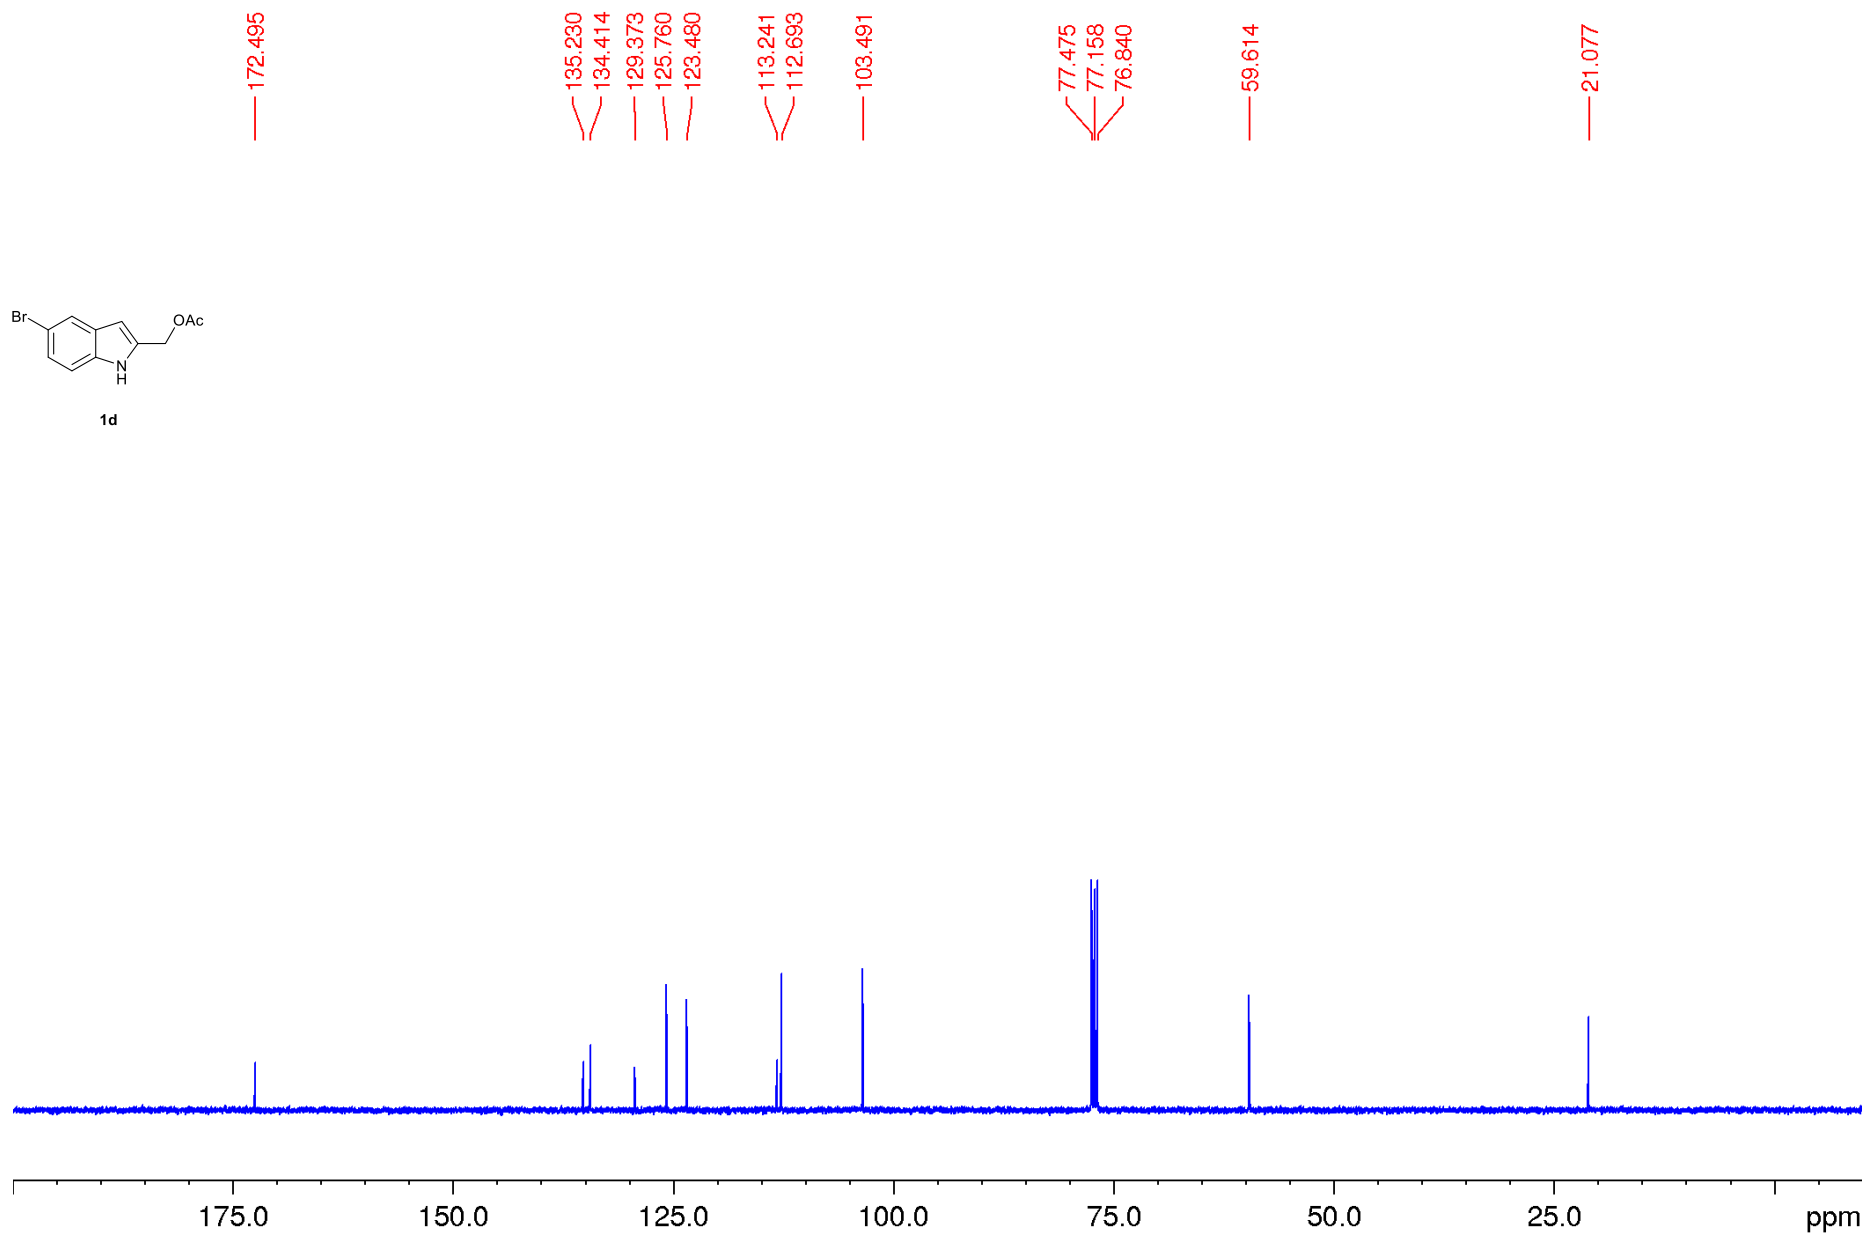

# DEPT 135 NMR-spectrum (CDCl<sub>3</sub>)

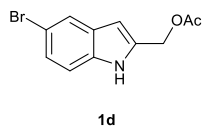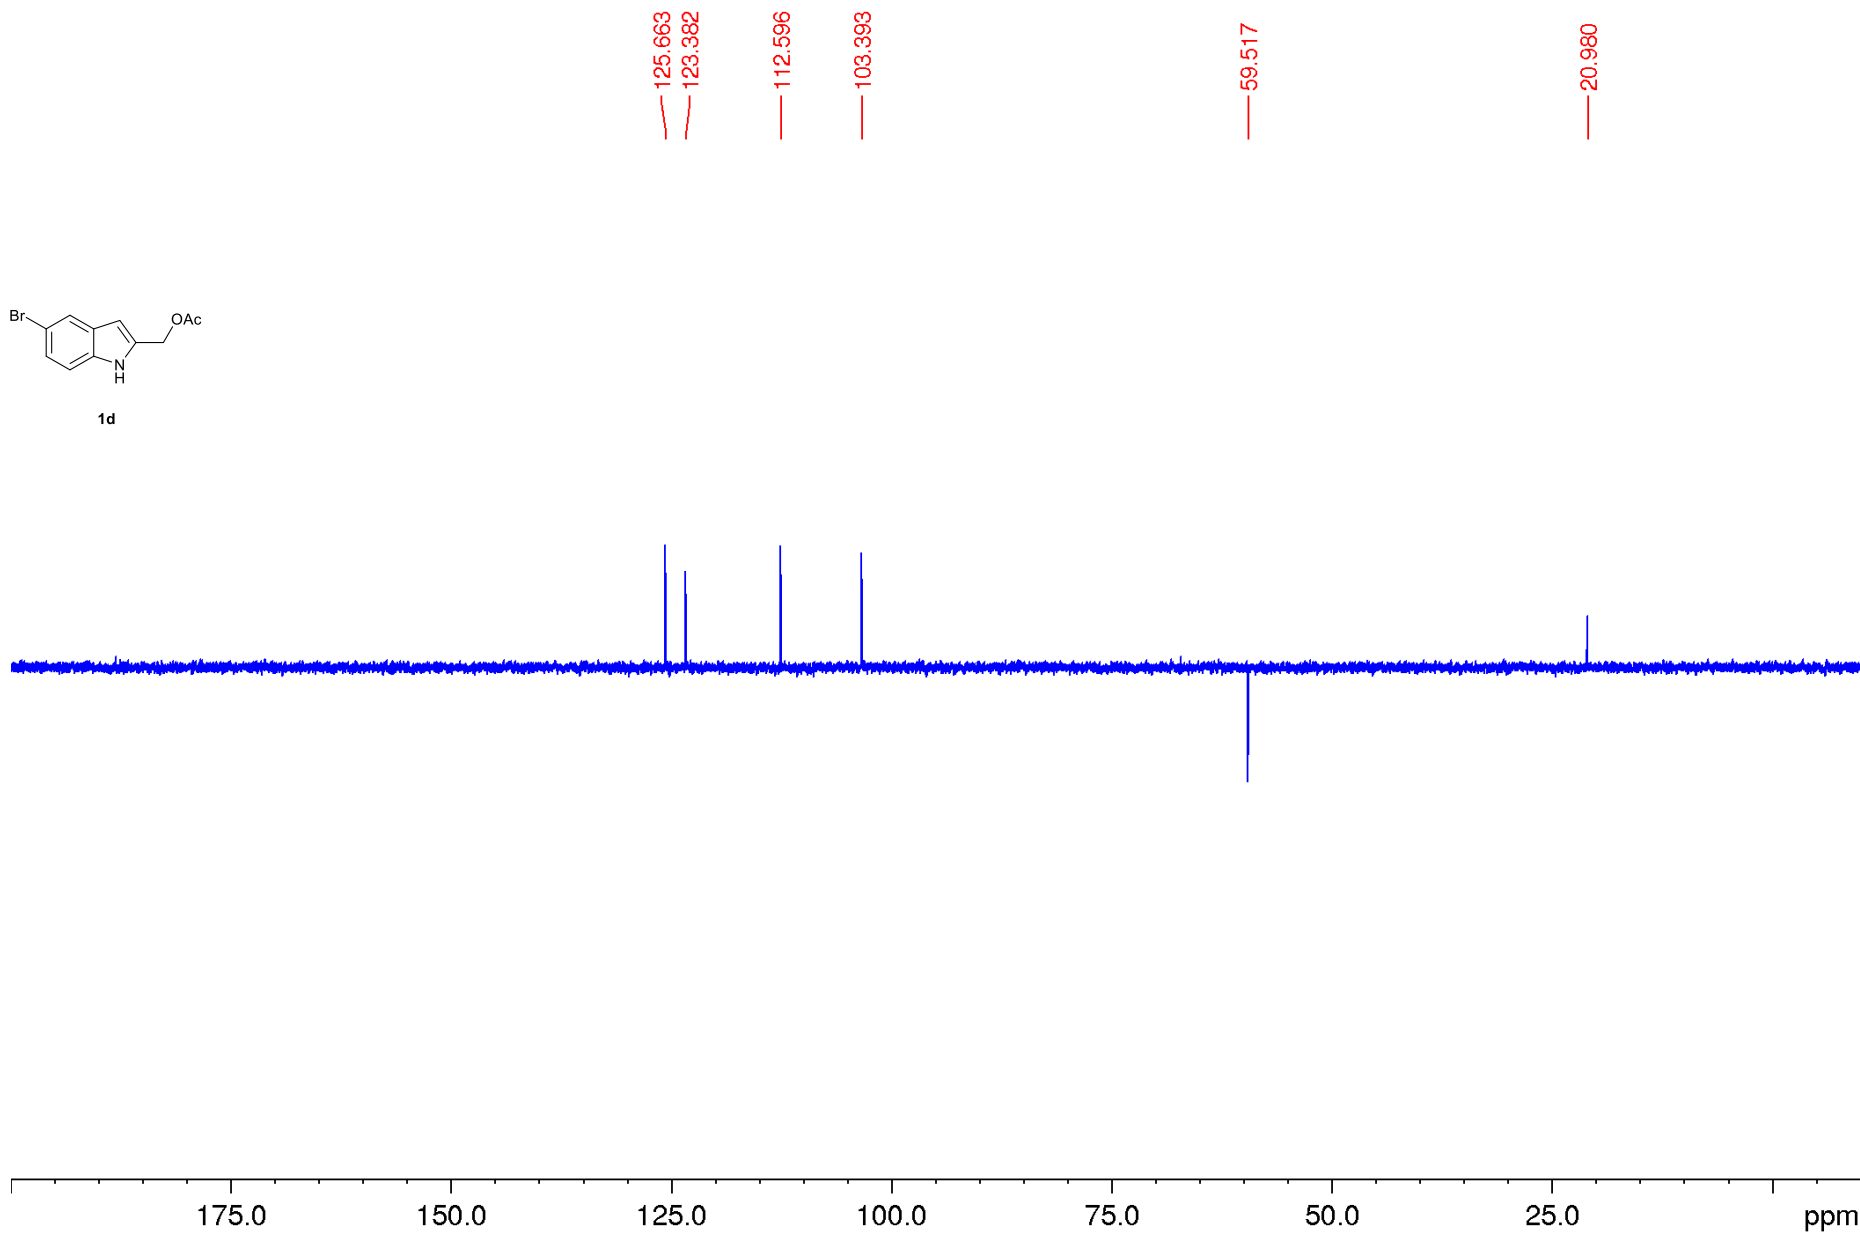

<sup>1</sup>H NMR-spectrum (400 MHz, CDCl<sub>3</sub>)

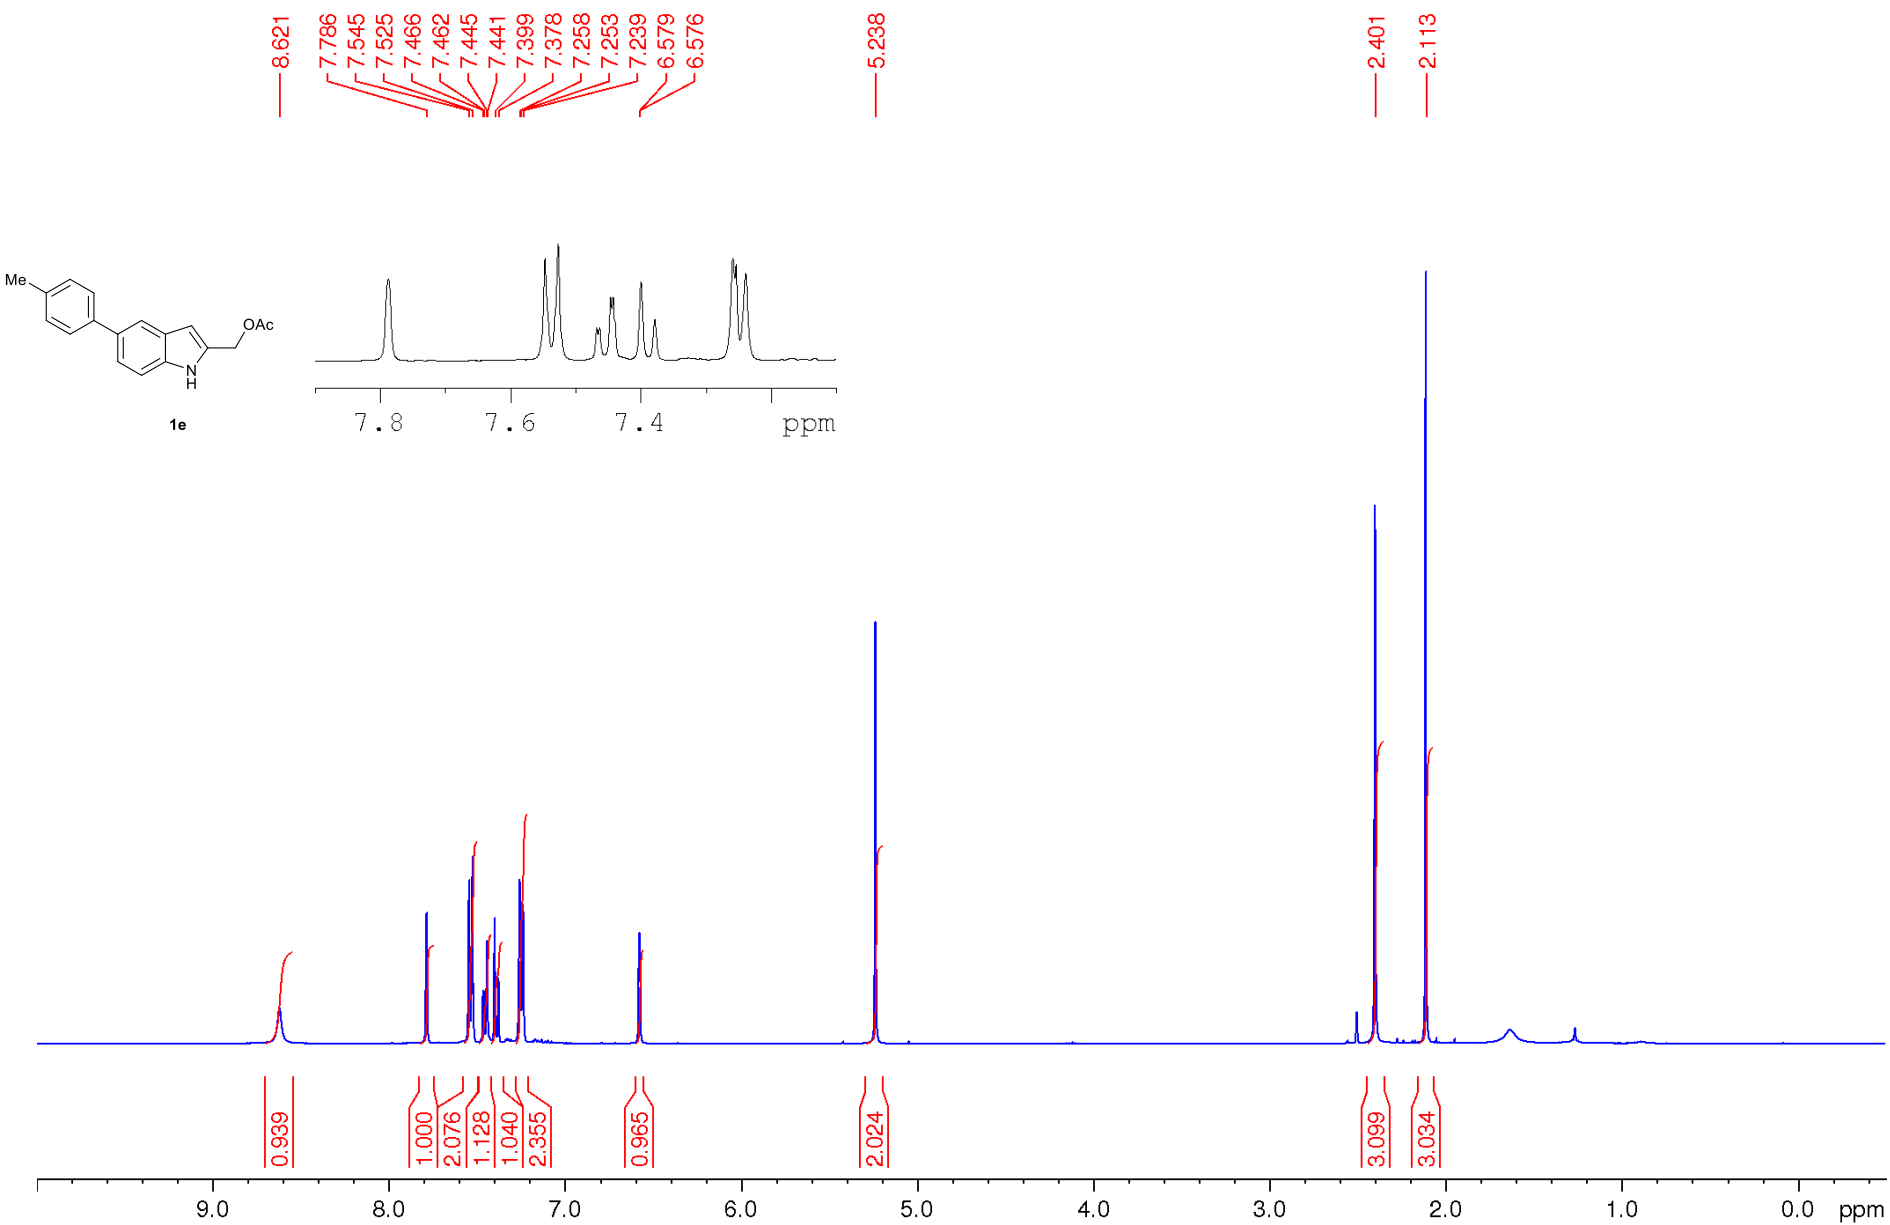

$^{13}\text{C}$  NMR-spectrum (100 MHz,  $\text{CDCl}_3$ )

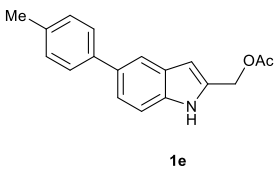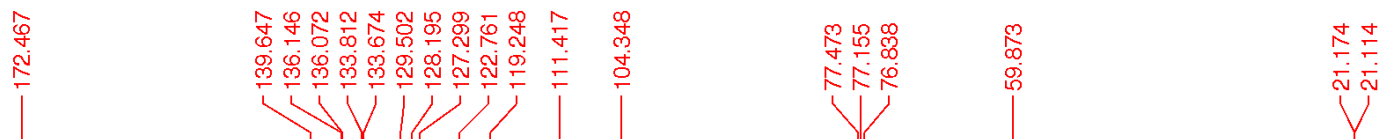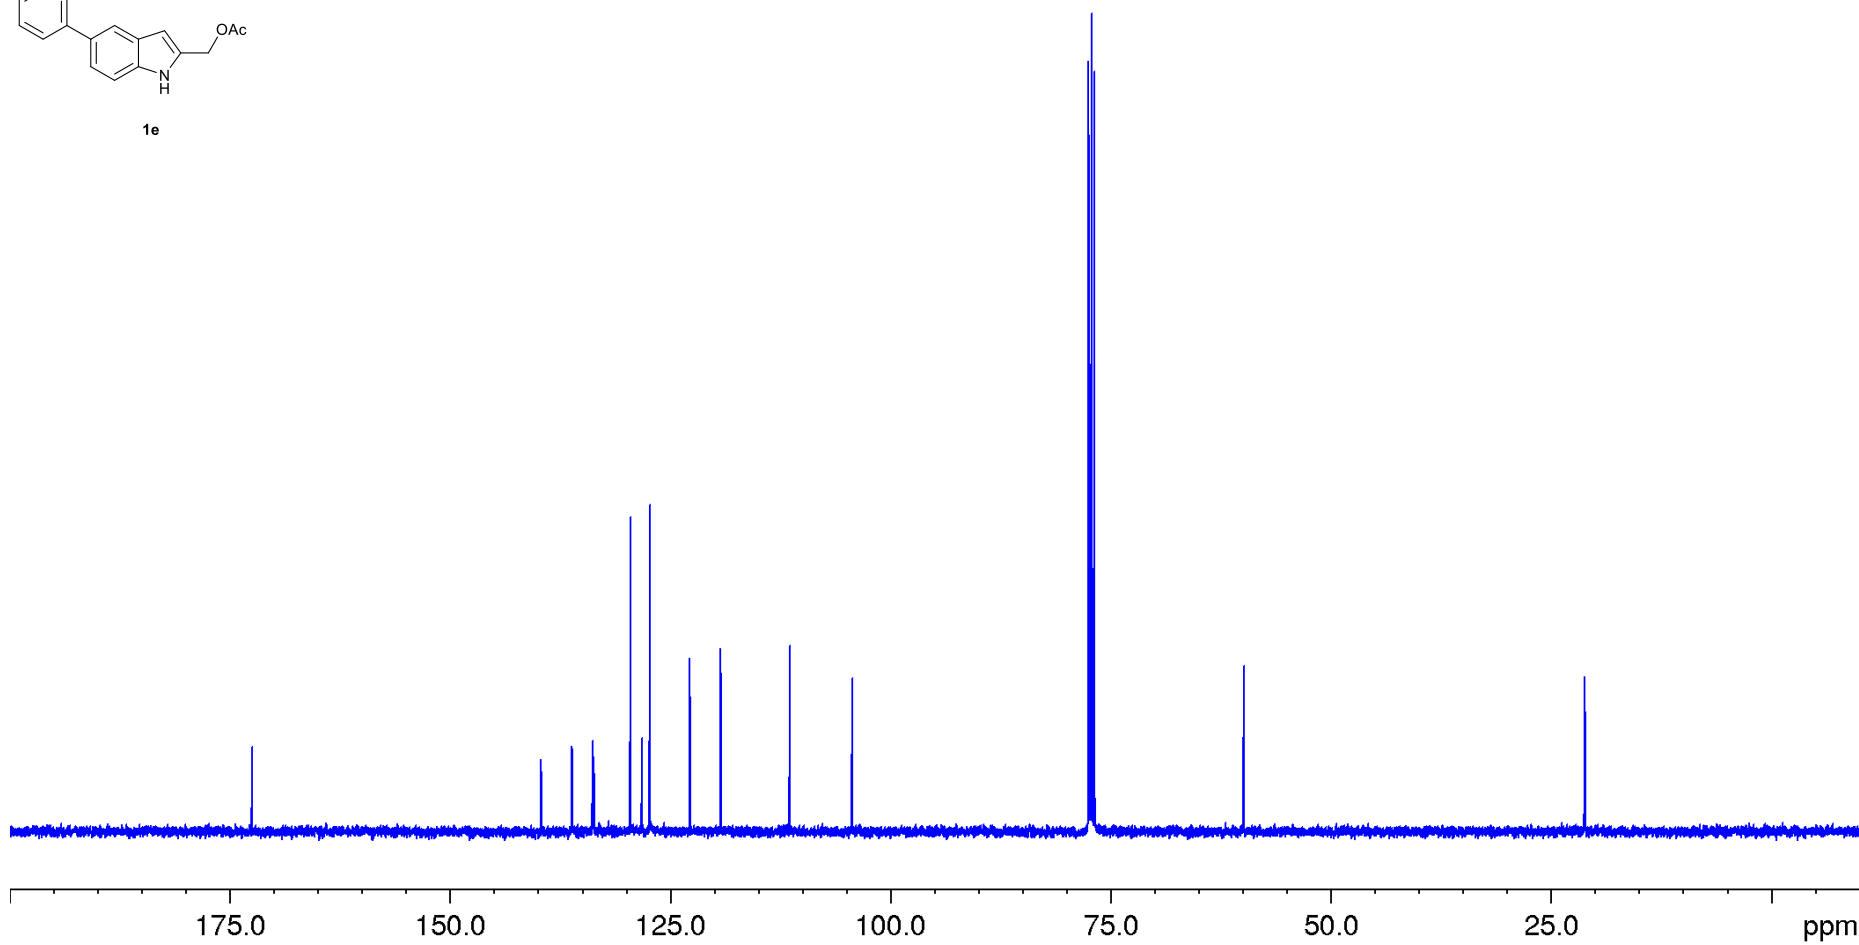



# DEPT 135 NMR-spectrum (CDCl<sub>3</sub>)

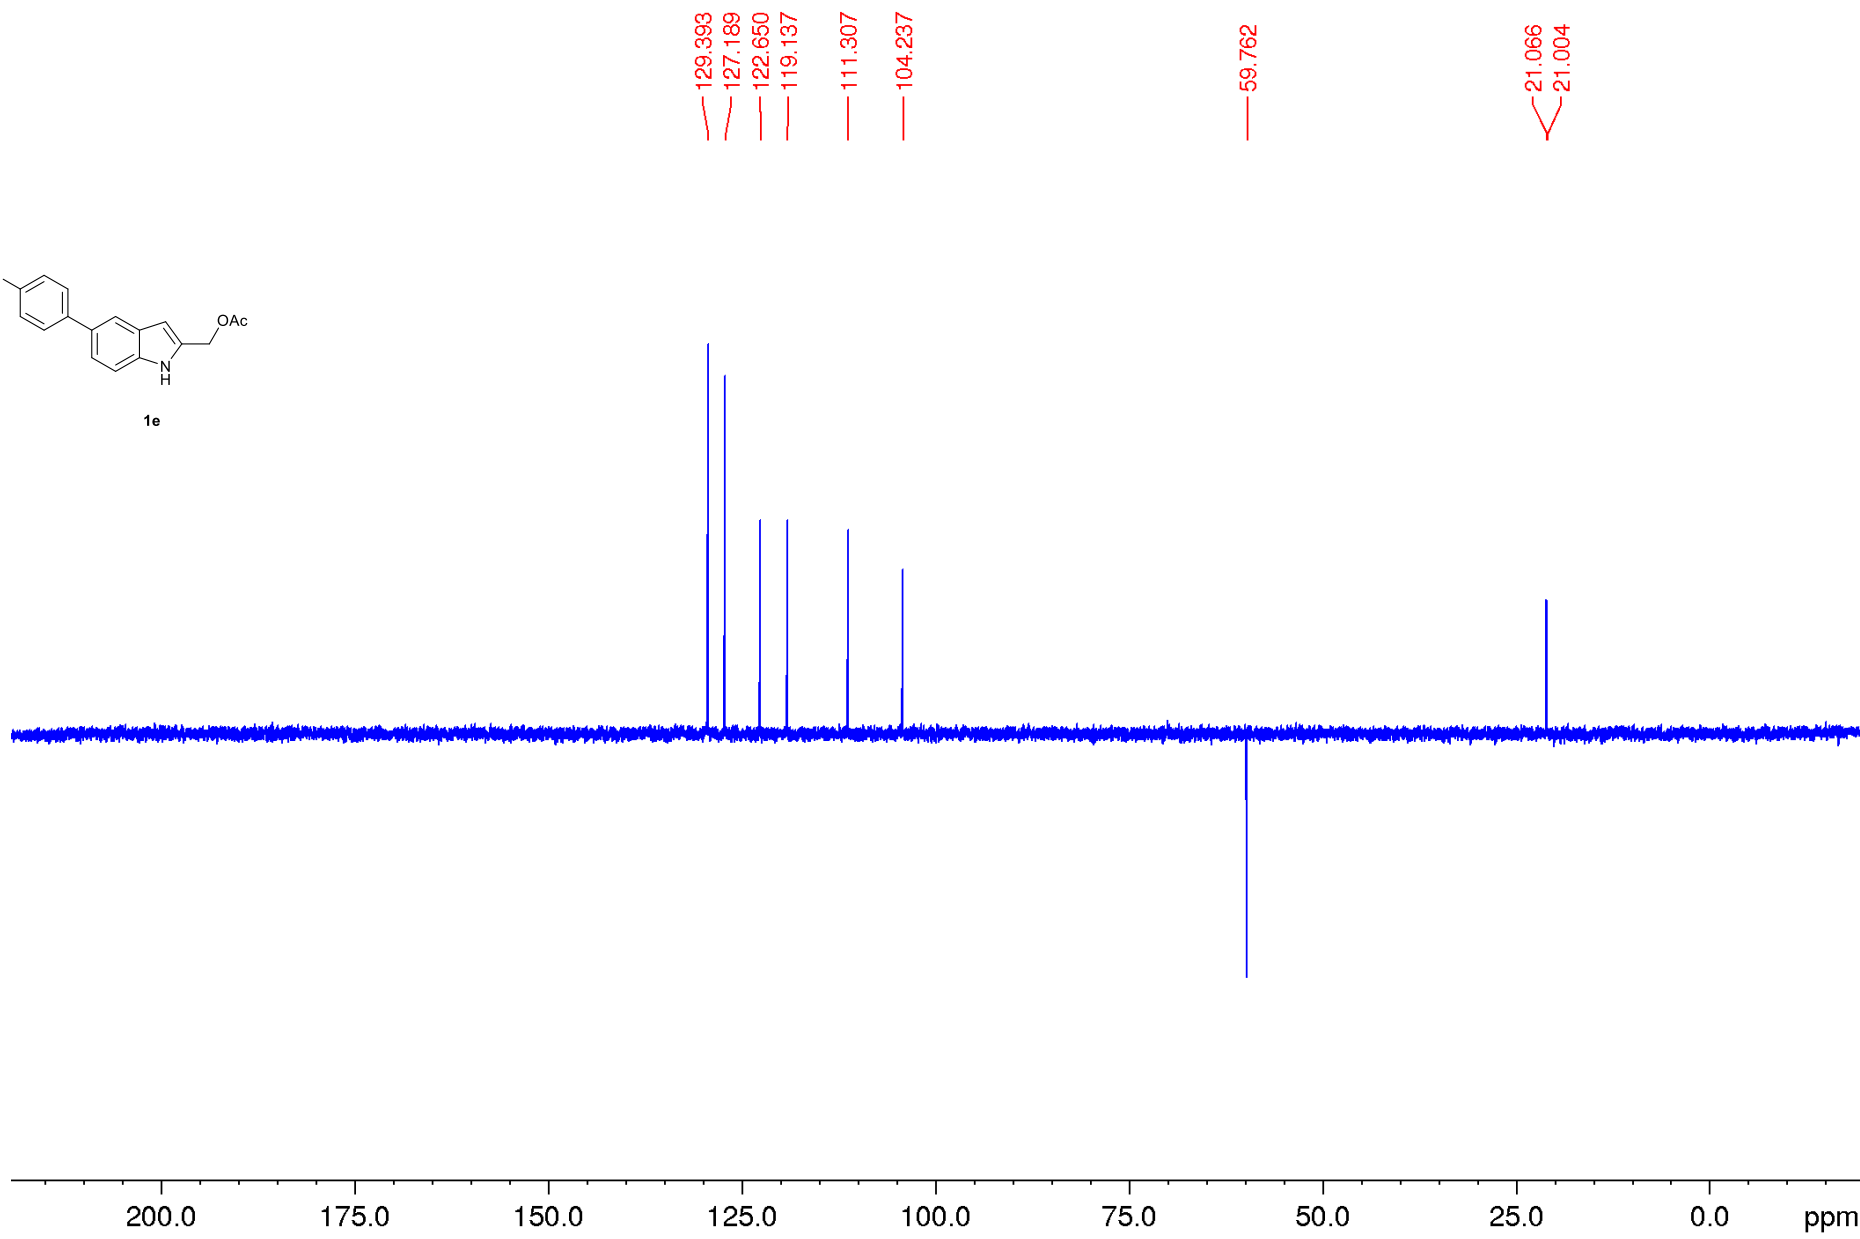

<sup>1</sup>H NMR-spectrum (400 MHz, CDCl<sub>3</sub>)

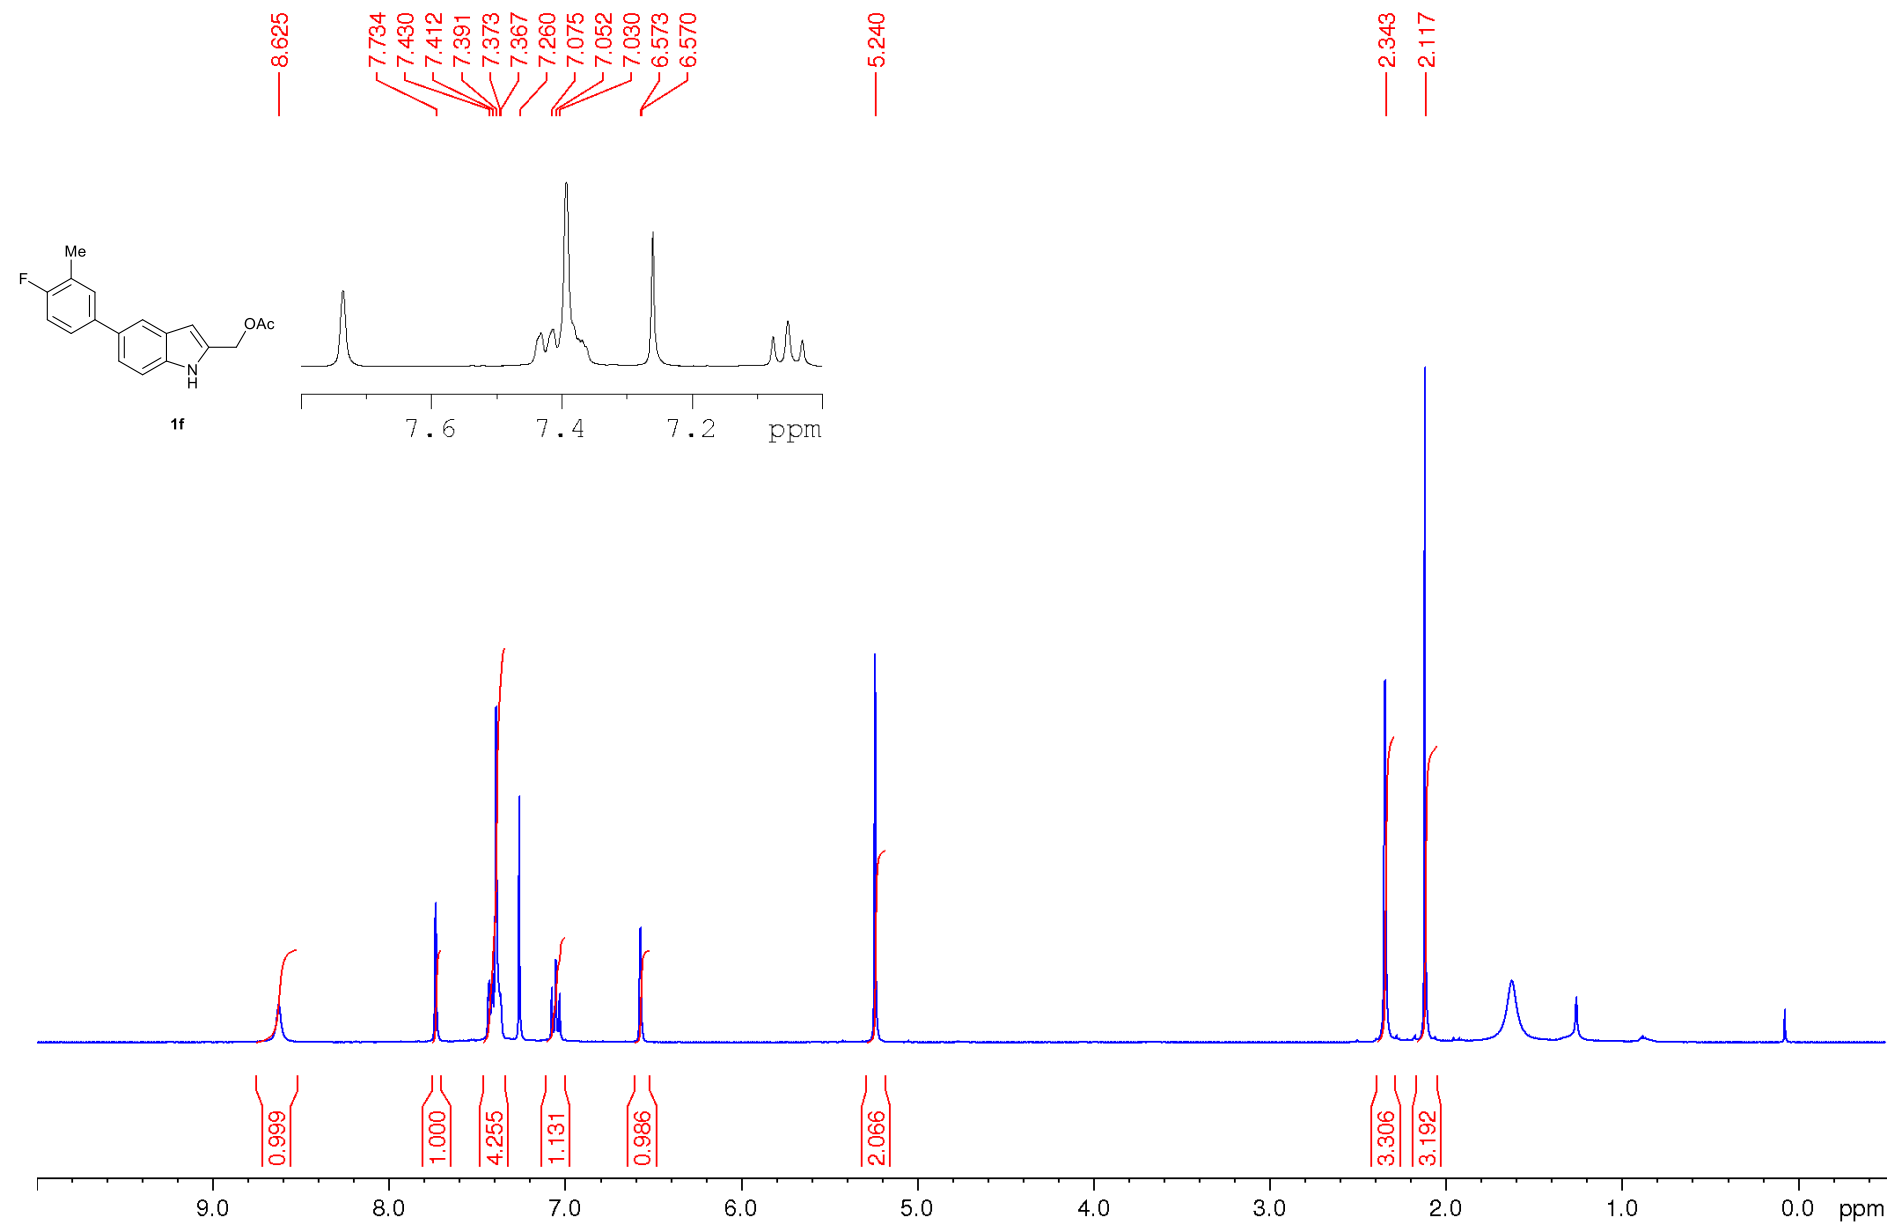

$^{13}\text{C}$  NMR-spectrum (100 MHz,  $\text{CDCl}_3$ )

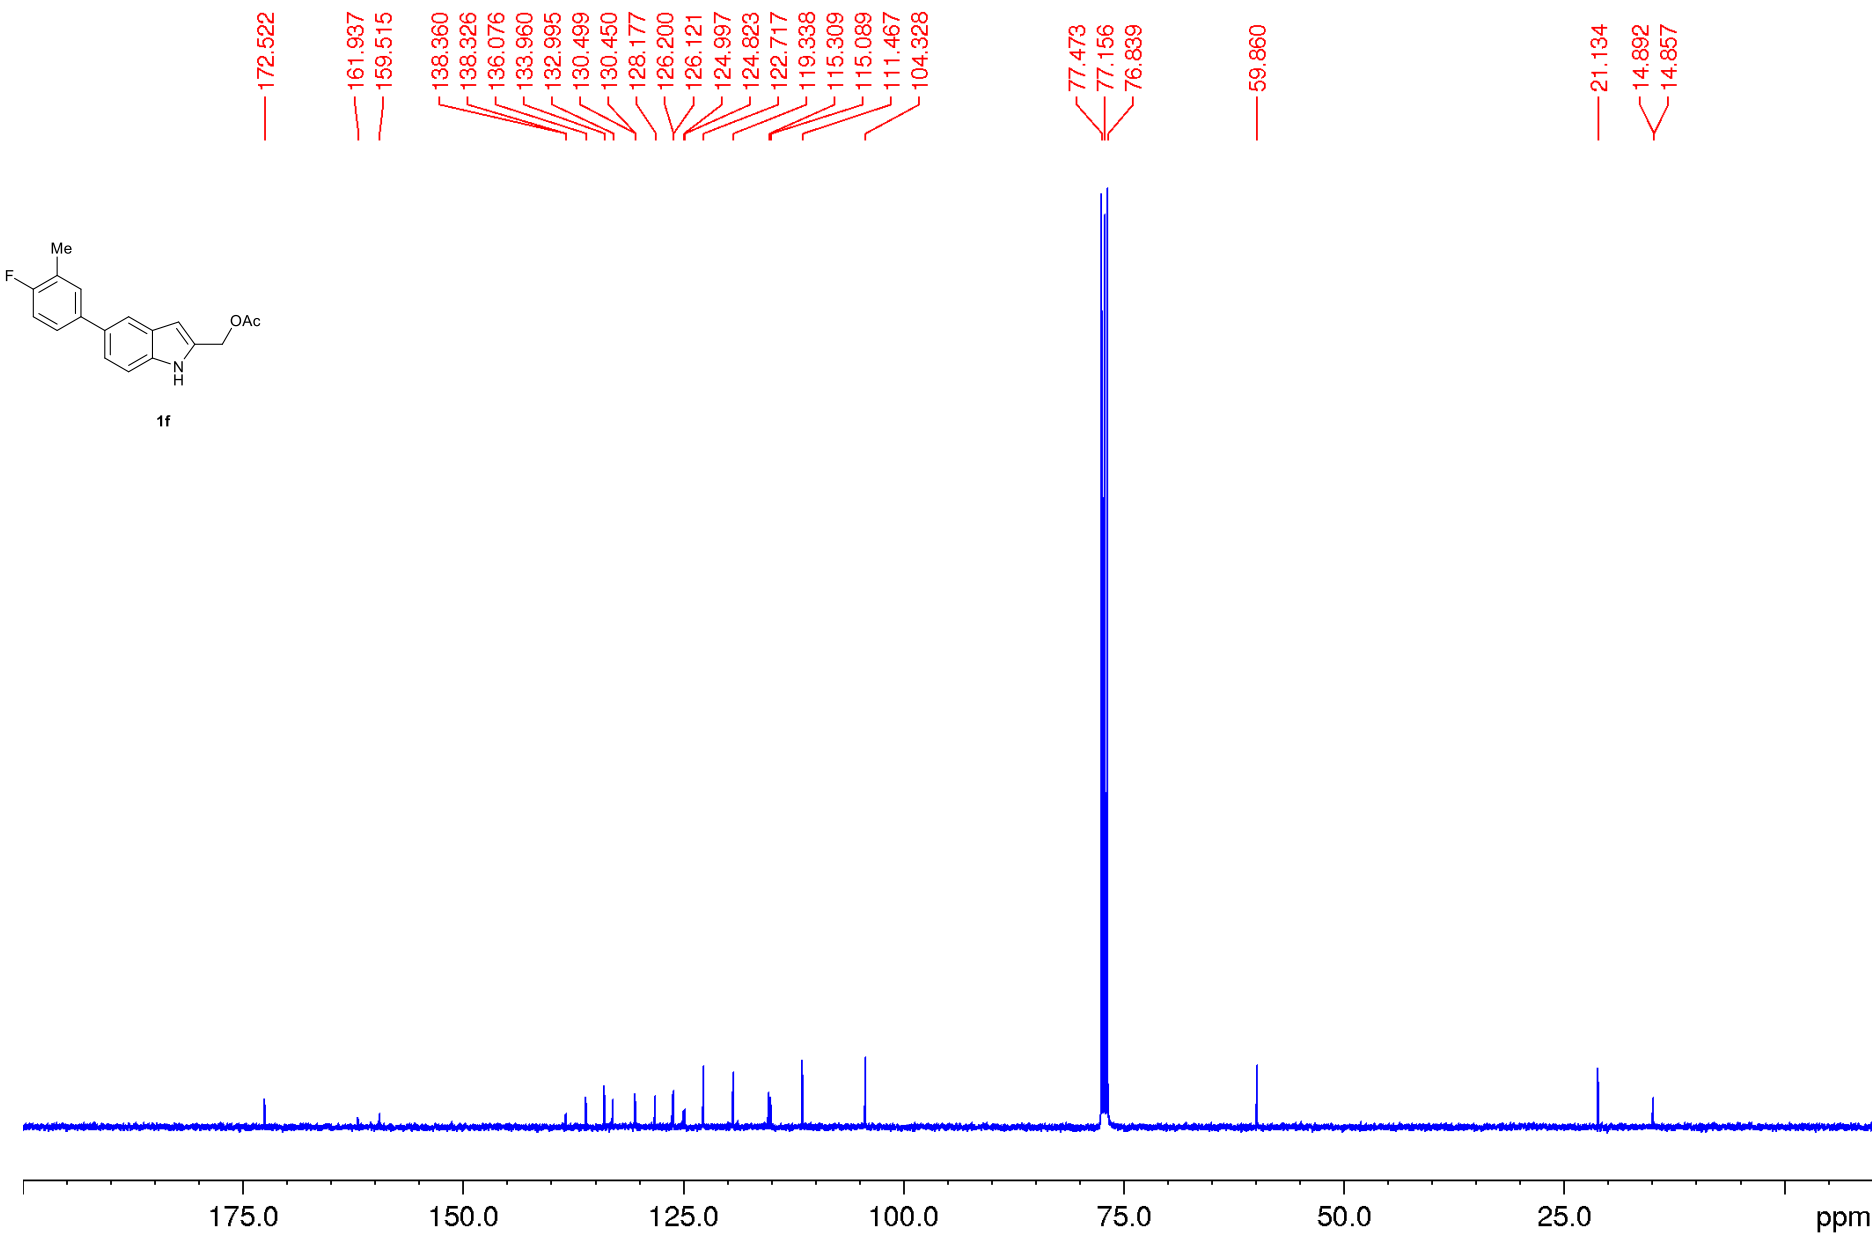

# DEPT 135 NMR-spectrum (CDCl<sub>3</sub>)

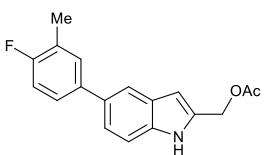

**1f**

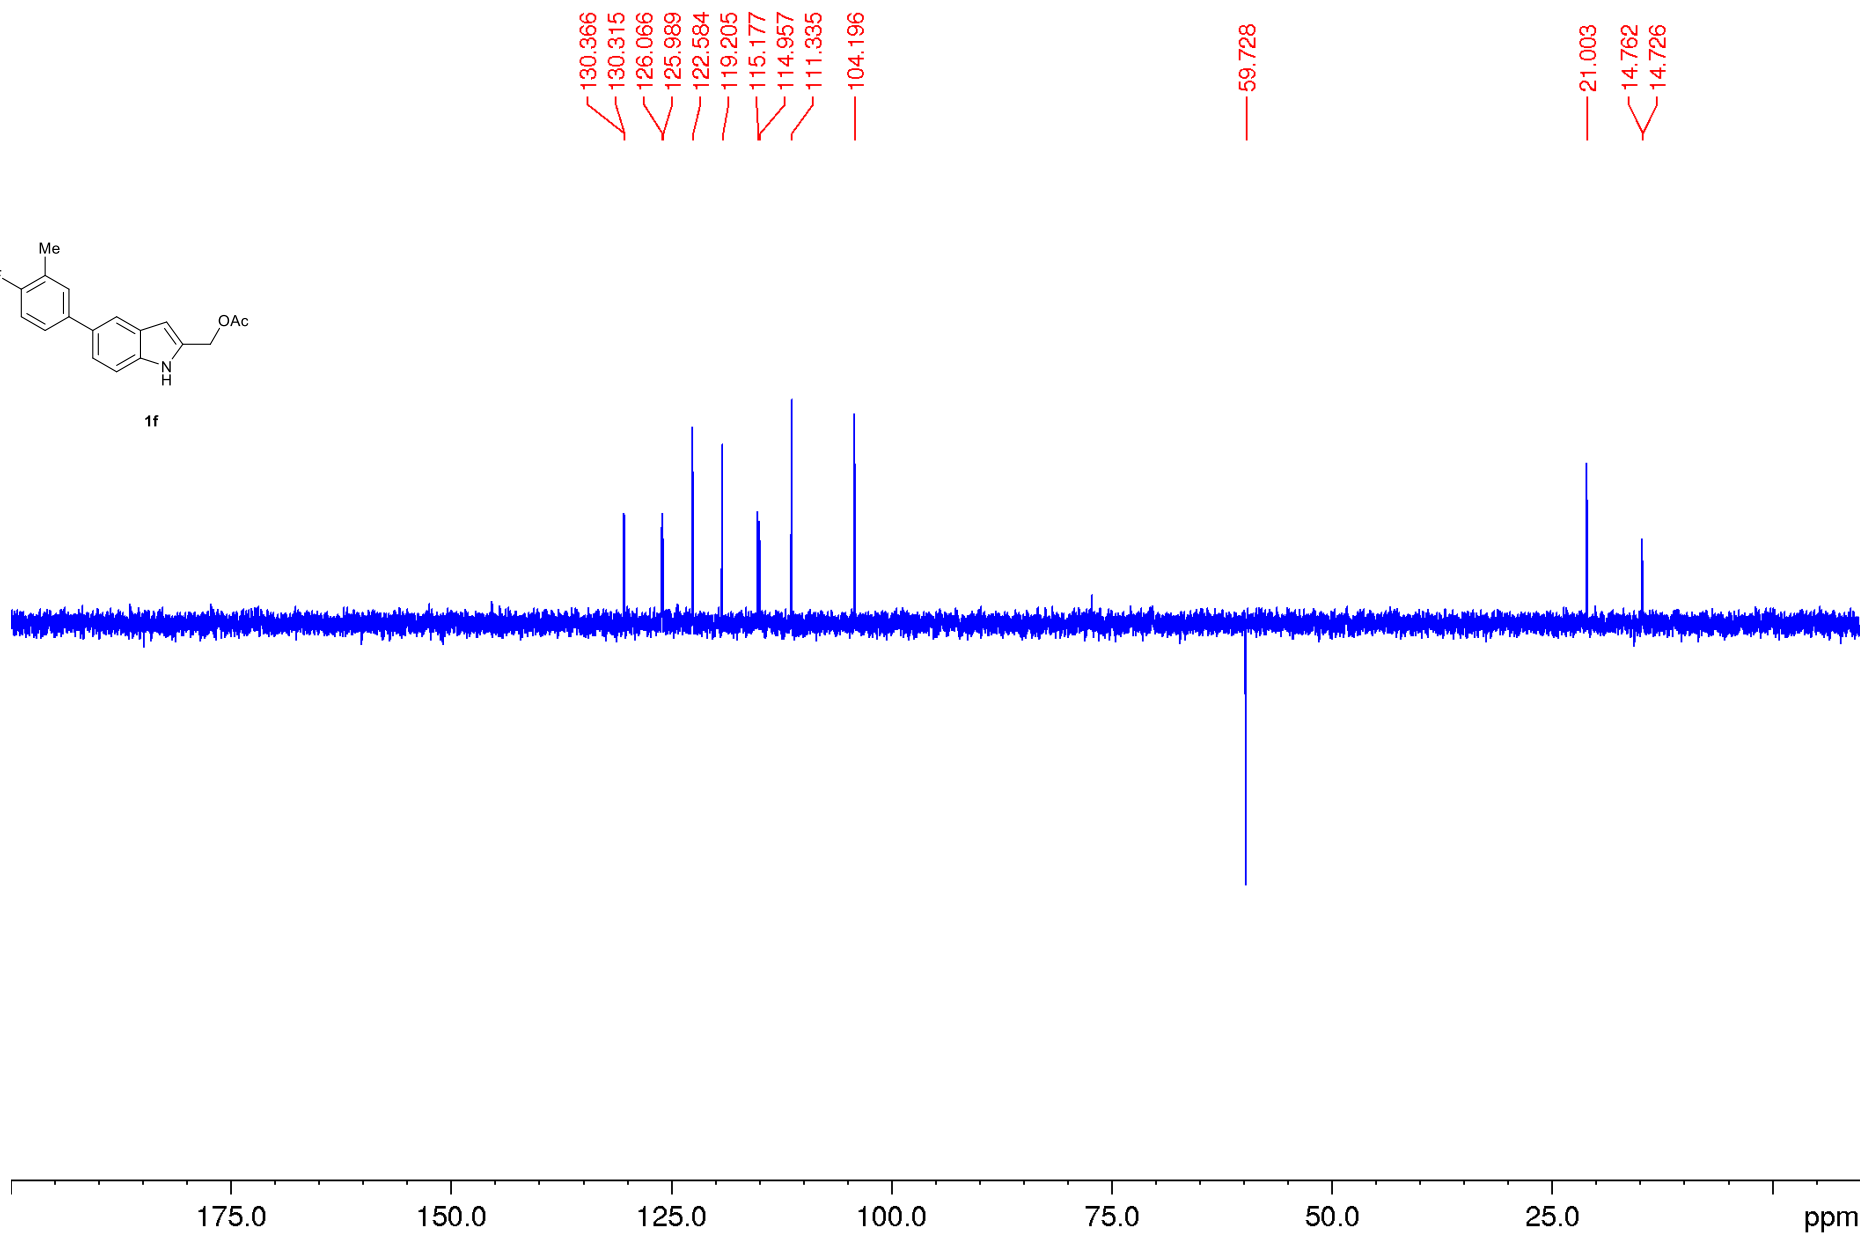

$^{19}\text{F}$  NMR-spectrum (376.5,  $\text{DMSO-}d_6$ )

-121.594  
-121.602  
-121.619  
-121.626  
-121.634  
-121.651  
-121.657

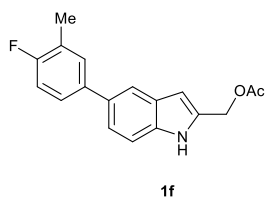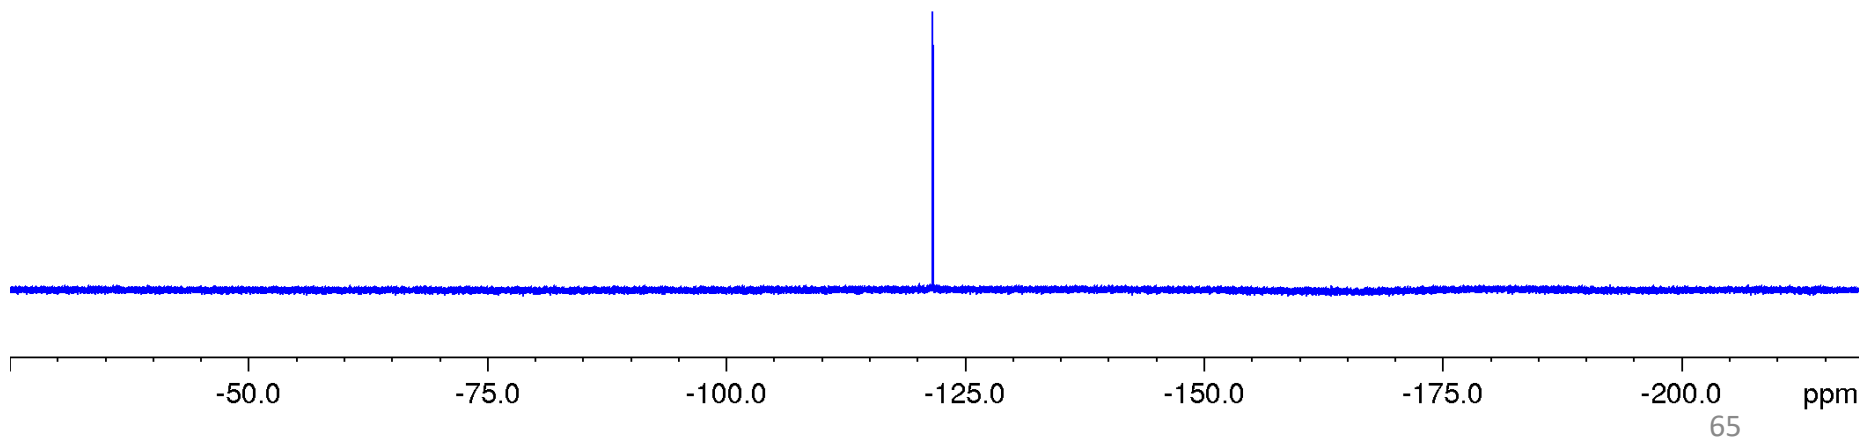

$^1\text{H}$  NMR-spectrum (400 MHz,  $\text{CDCl}_3$ )

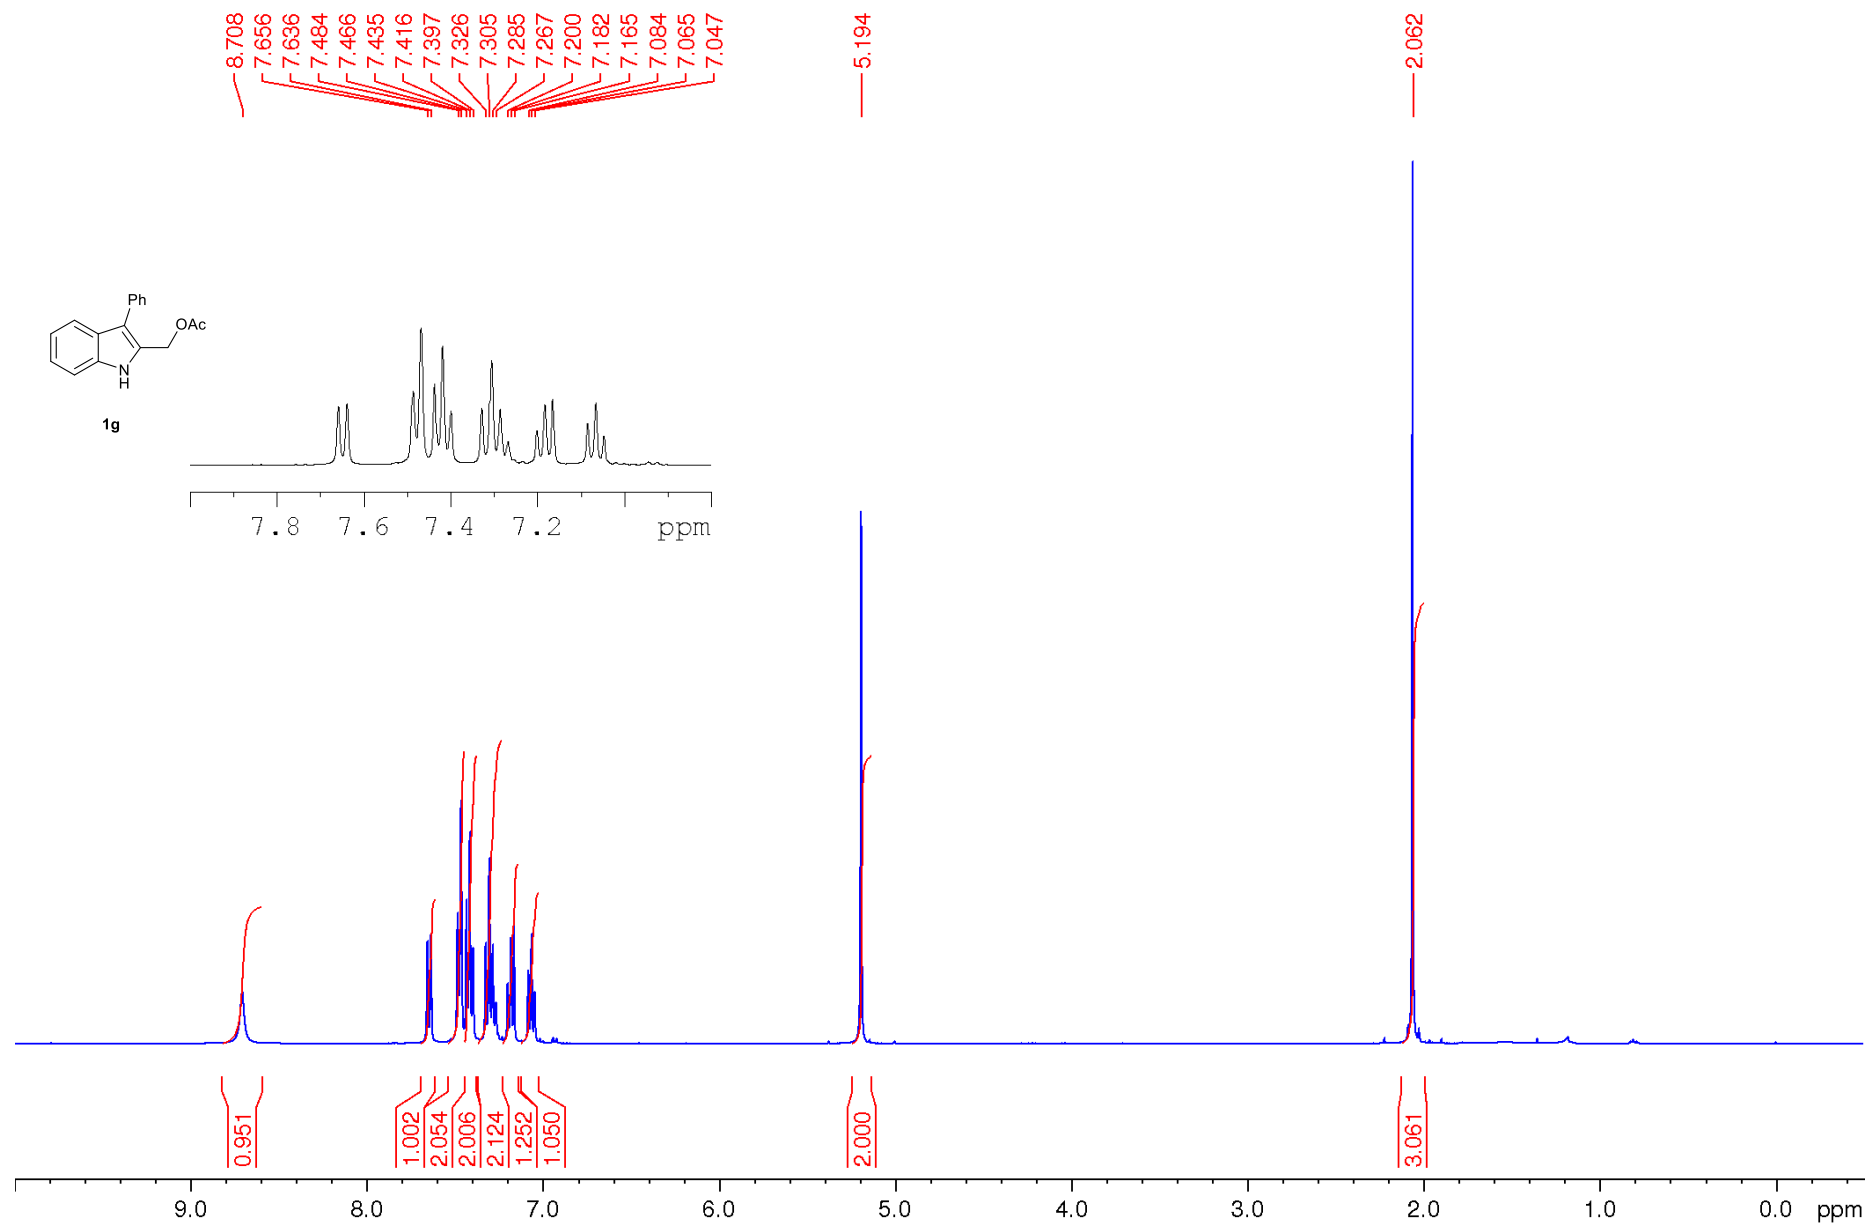

$^{13}\text{C}$  NMR-spectrum (100 MHz,  $\text{CDCl}_3$ )

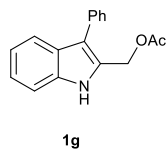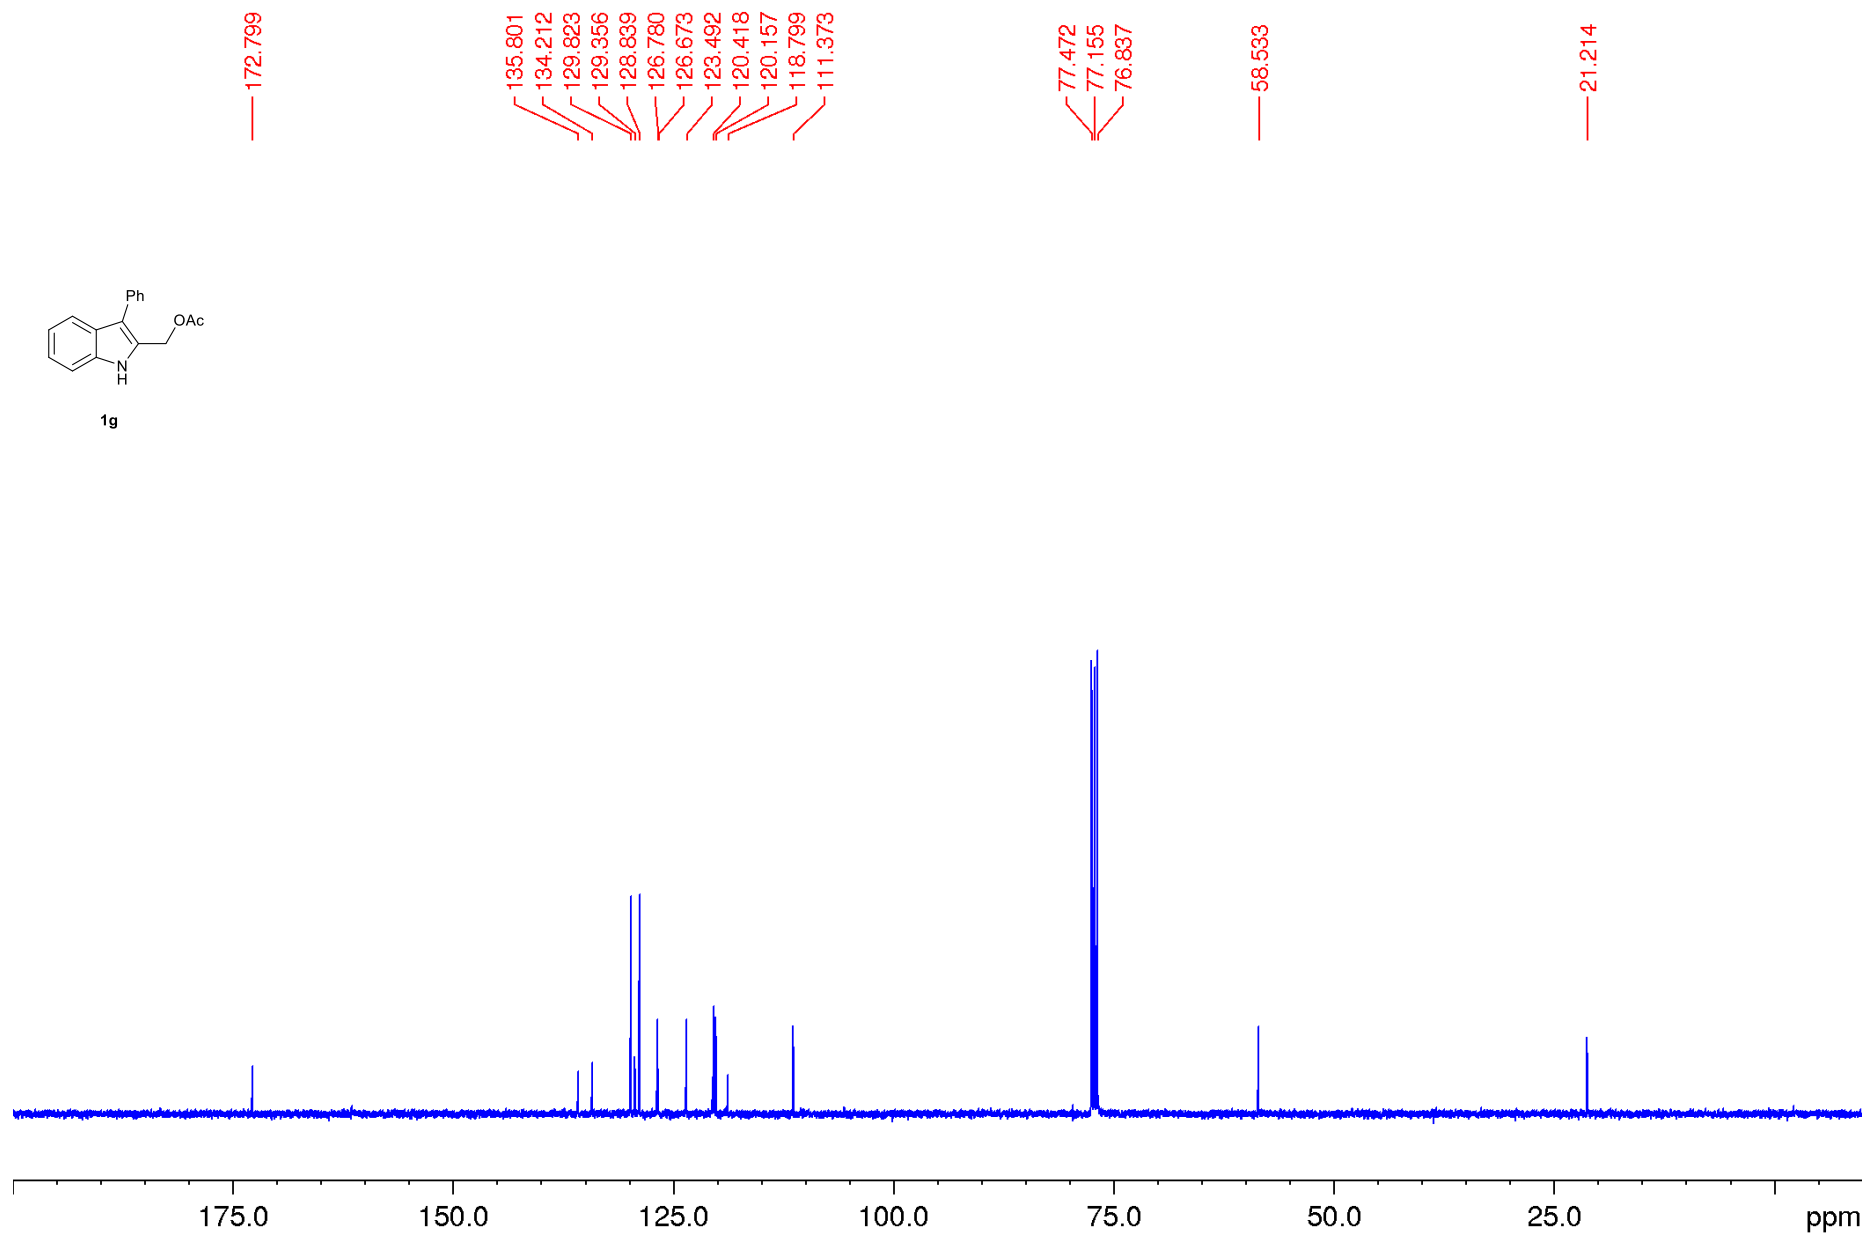

# DEPT 135 NMR-spectrum (CDCl<sub>3</sub>)

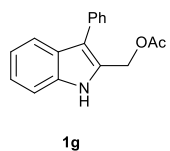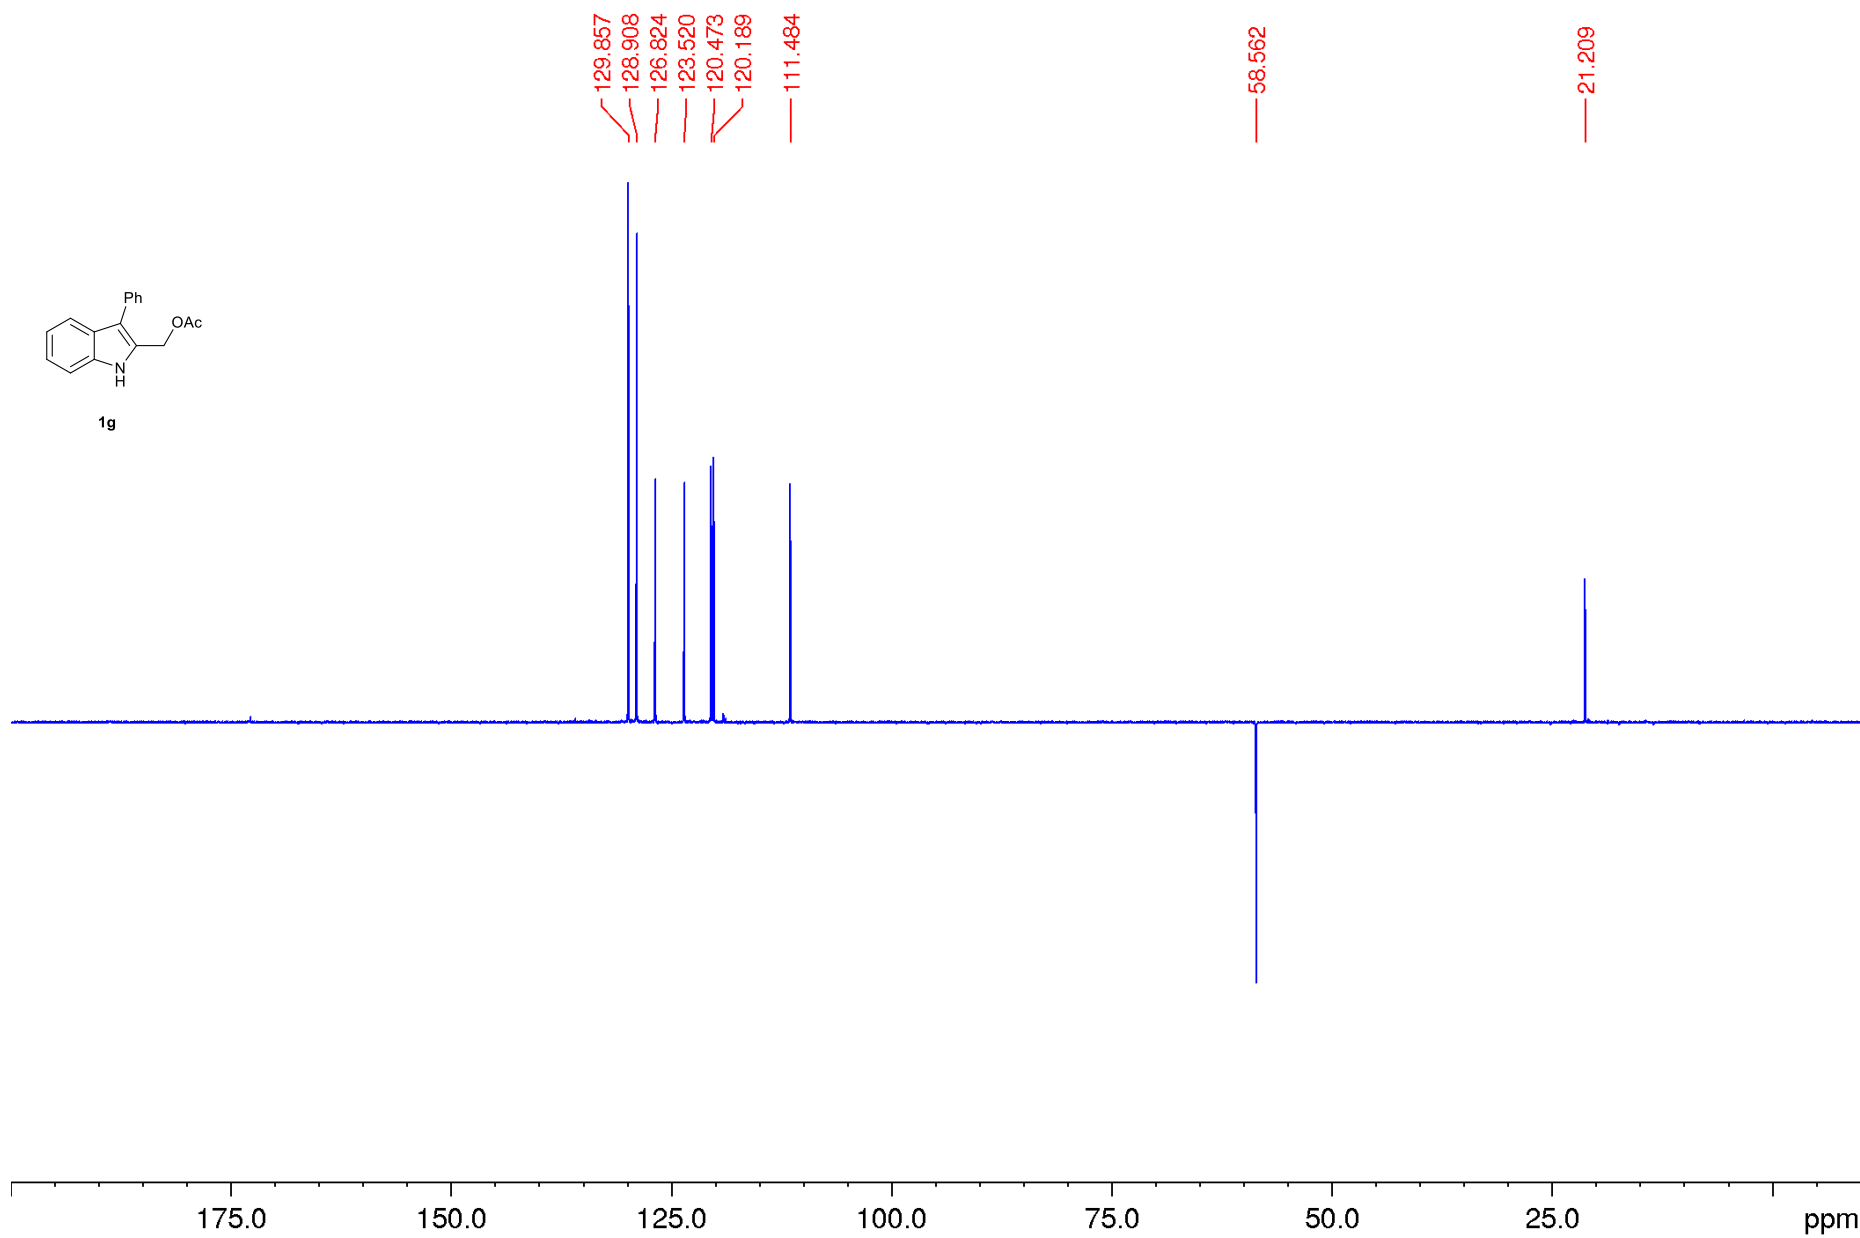



# <sup>1</sup>H NMR-spectrum (400 MHz, CDCl<sub>3</sub>)

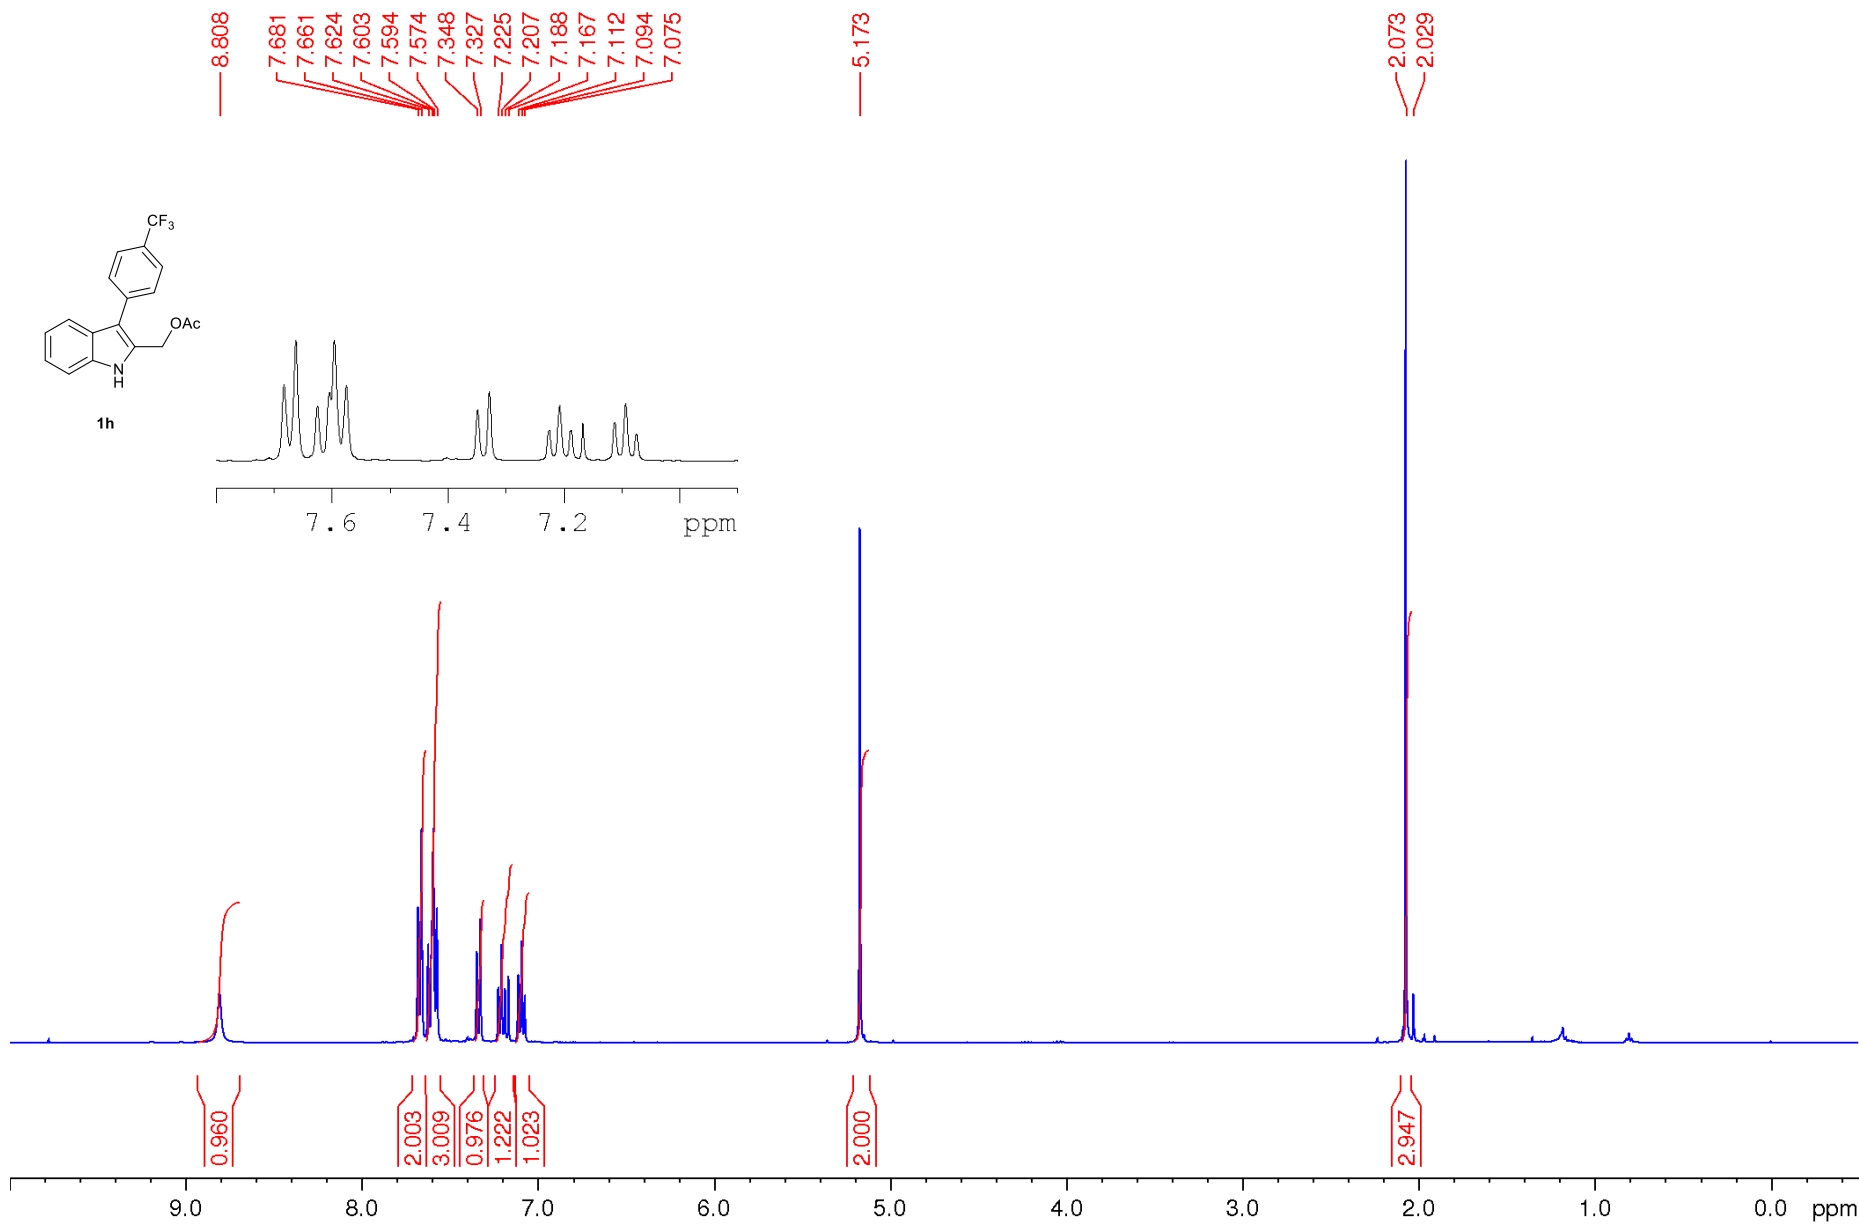

# $^{13}\text{C}$ NMR-spectrum (100 MHz, $\text{CDCl}_3$ )

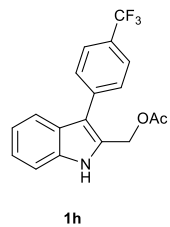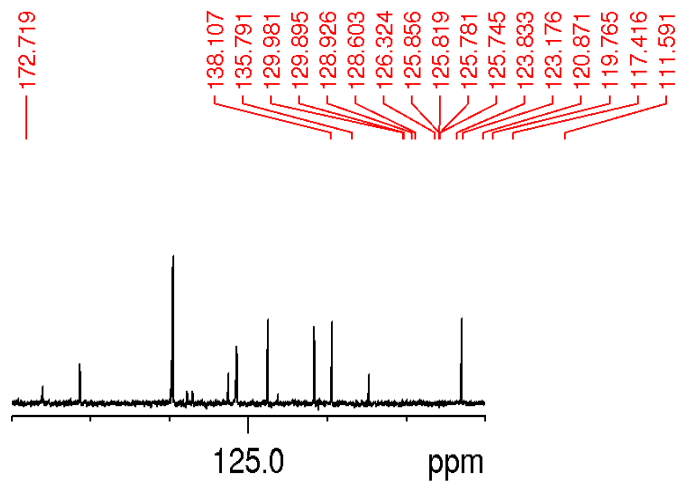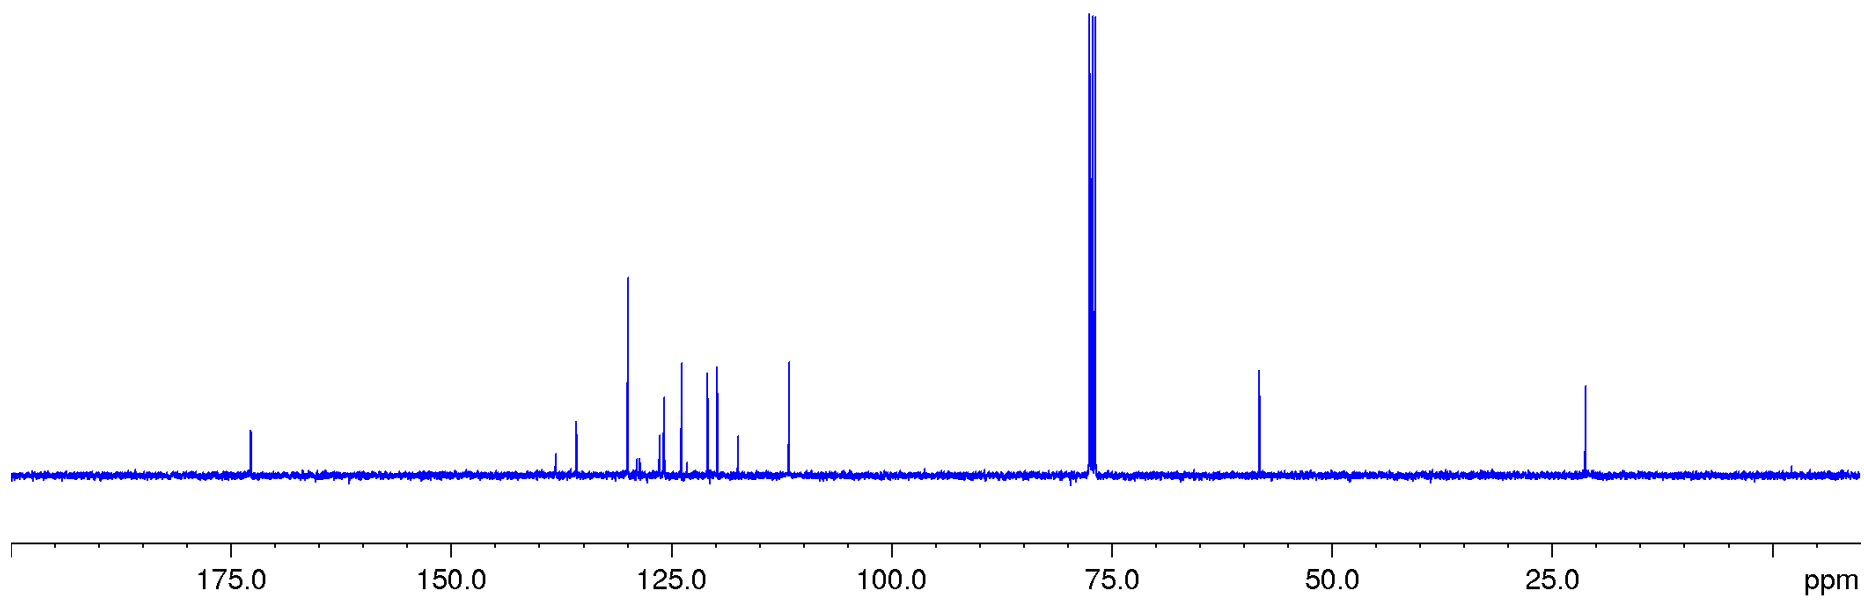

# DEPT 135 NMR-spectrum (CDCl<sub>3</sub>)

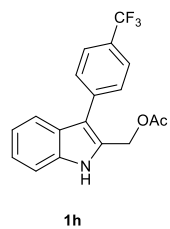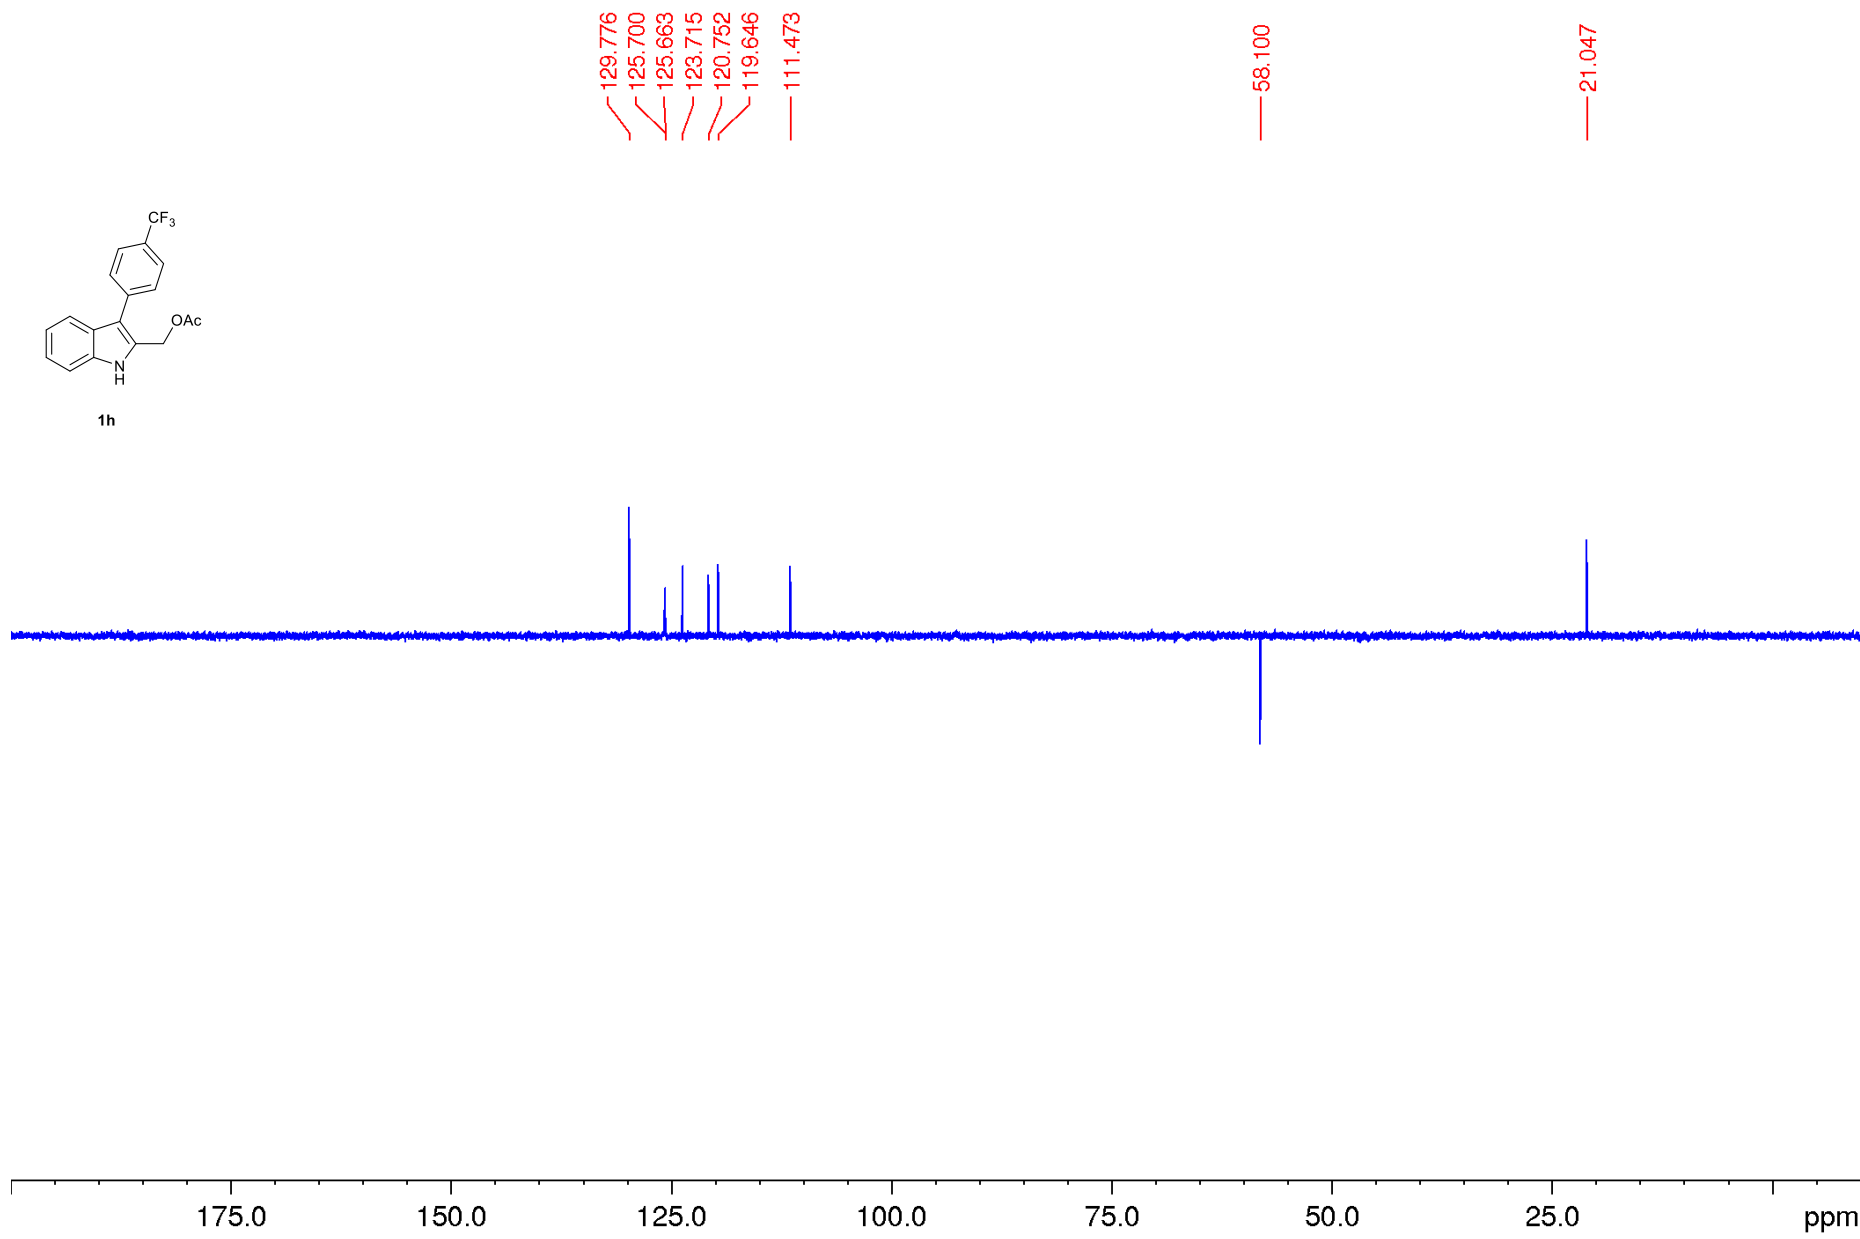

$^{19}\text{F}$  NMR-spectrum (376.5 MHz,  $\text{CDCl}_3$ )

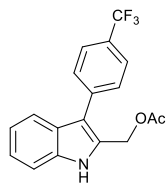

1h

-62.314

0.0

-25.0

-50.0

-75.0

-100.0

-125.0

ppm

# $^1\text{H}$ NMR-spectrum (400 MHz, $\text{CDCl}_3$ )

8.469  
7.429  
7.409  
7.374  
7.370  
7.354  
7.351  
7.314  
7.308  
7.292  
7.274  
7.267  
7.262  
7.255  
7.195  
7.176  
7.175  
7.080  
7.077  
7.060  
7.042  
7.039  
6.984  
6.982  
6.964  
6.944  
6.132  
6.130  
6.128

2.044

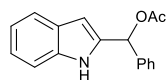

4a

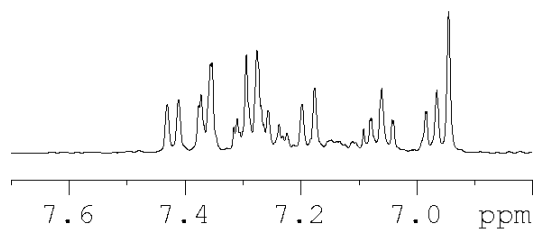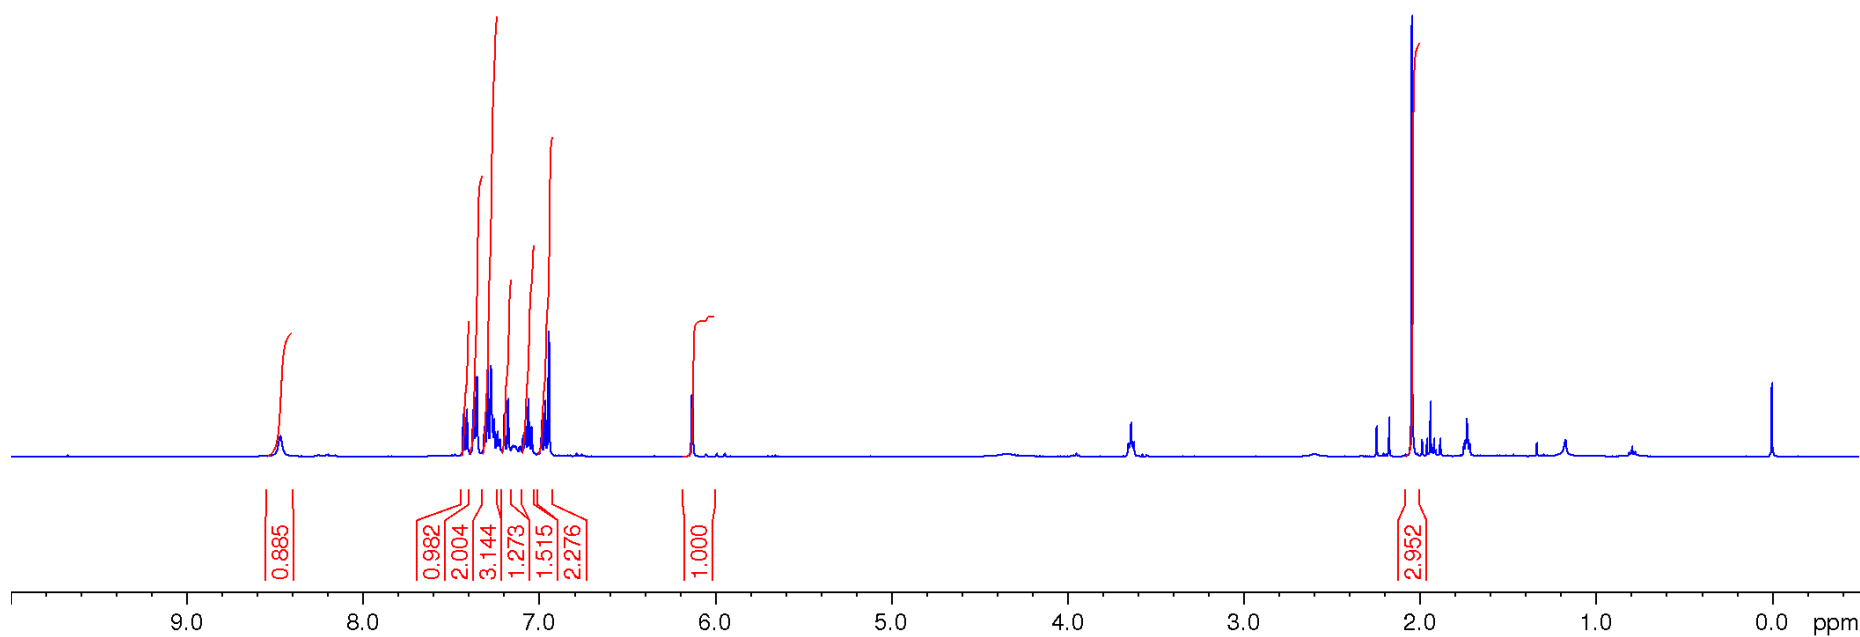

$^{13}\text{C}$  NMR-spectrum (100 MHz,  $\text{CDCl}_3$ )

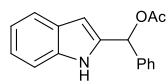

4a

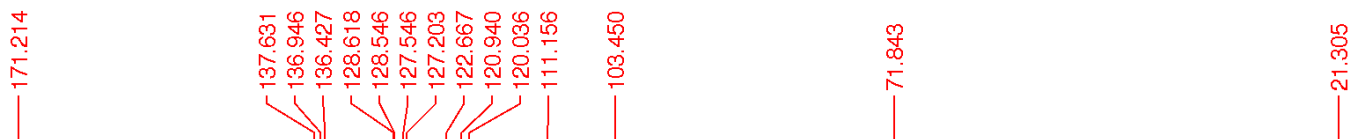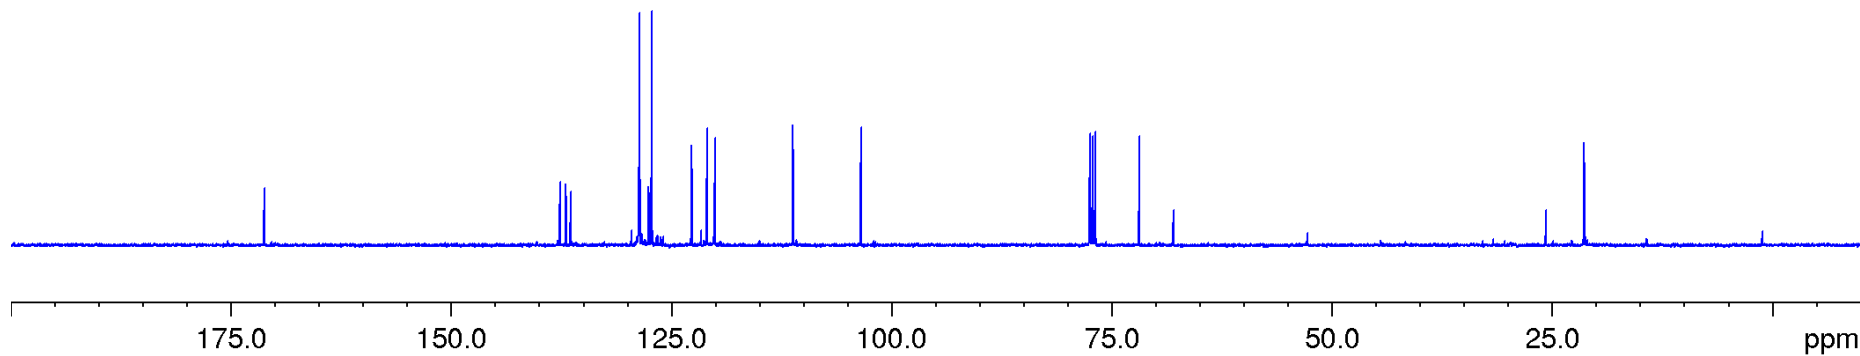

# DEPT 135 NMR-spectrum ( $\text{CDCl}_3$ )

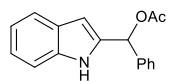

4a

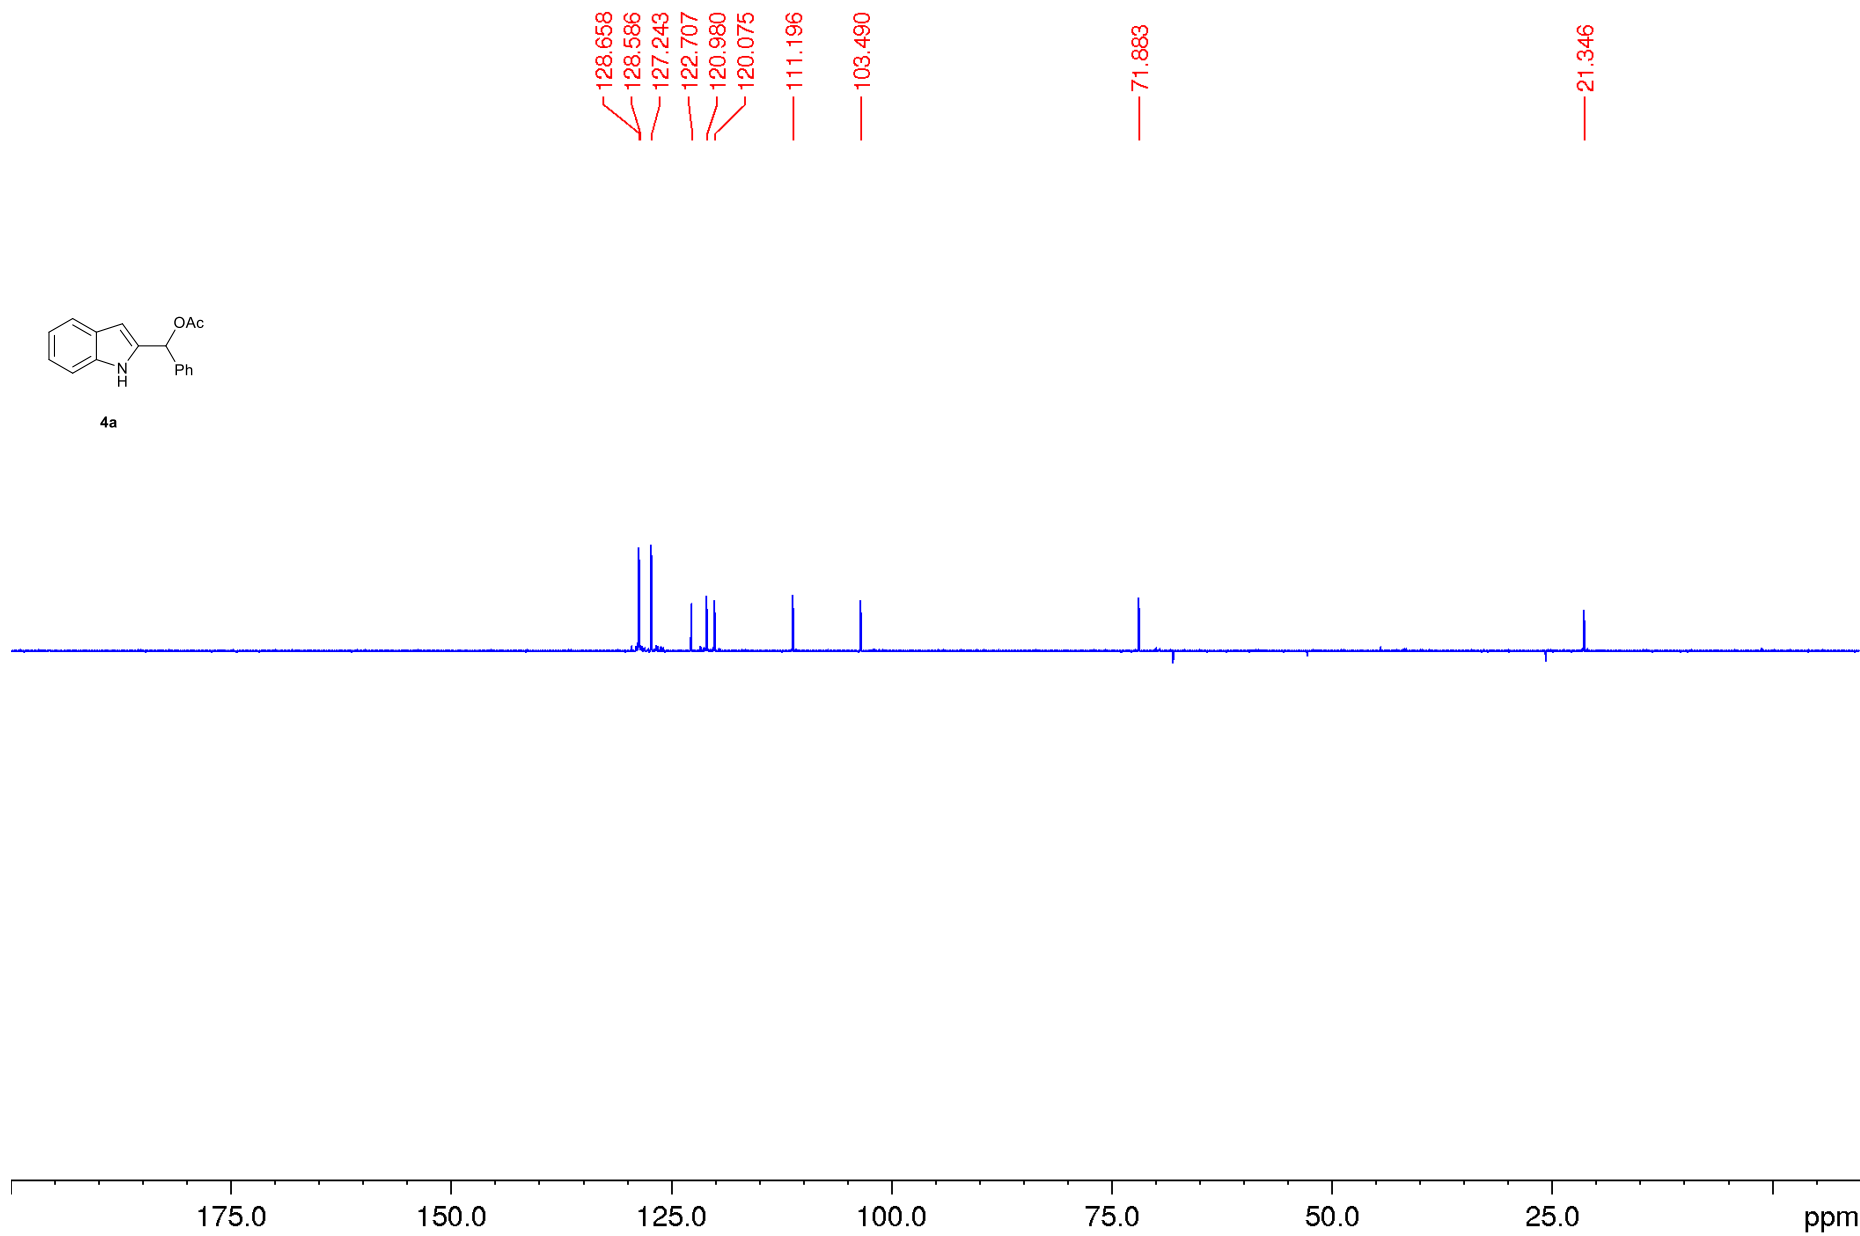

$^1\text{H}$  NMR-spectrum (400 MHz,  $\text{CDCl}_3$ )

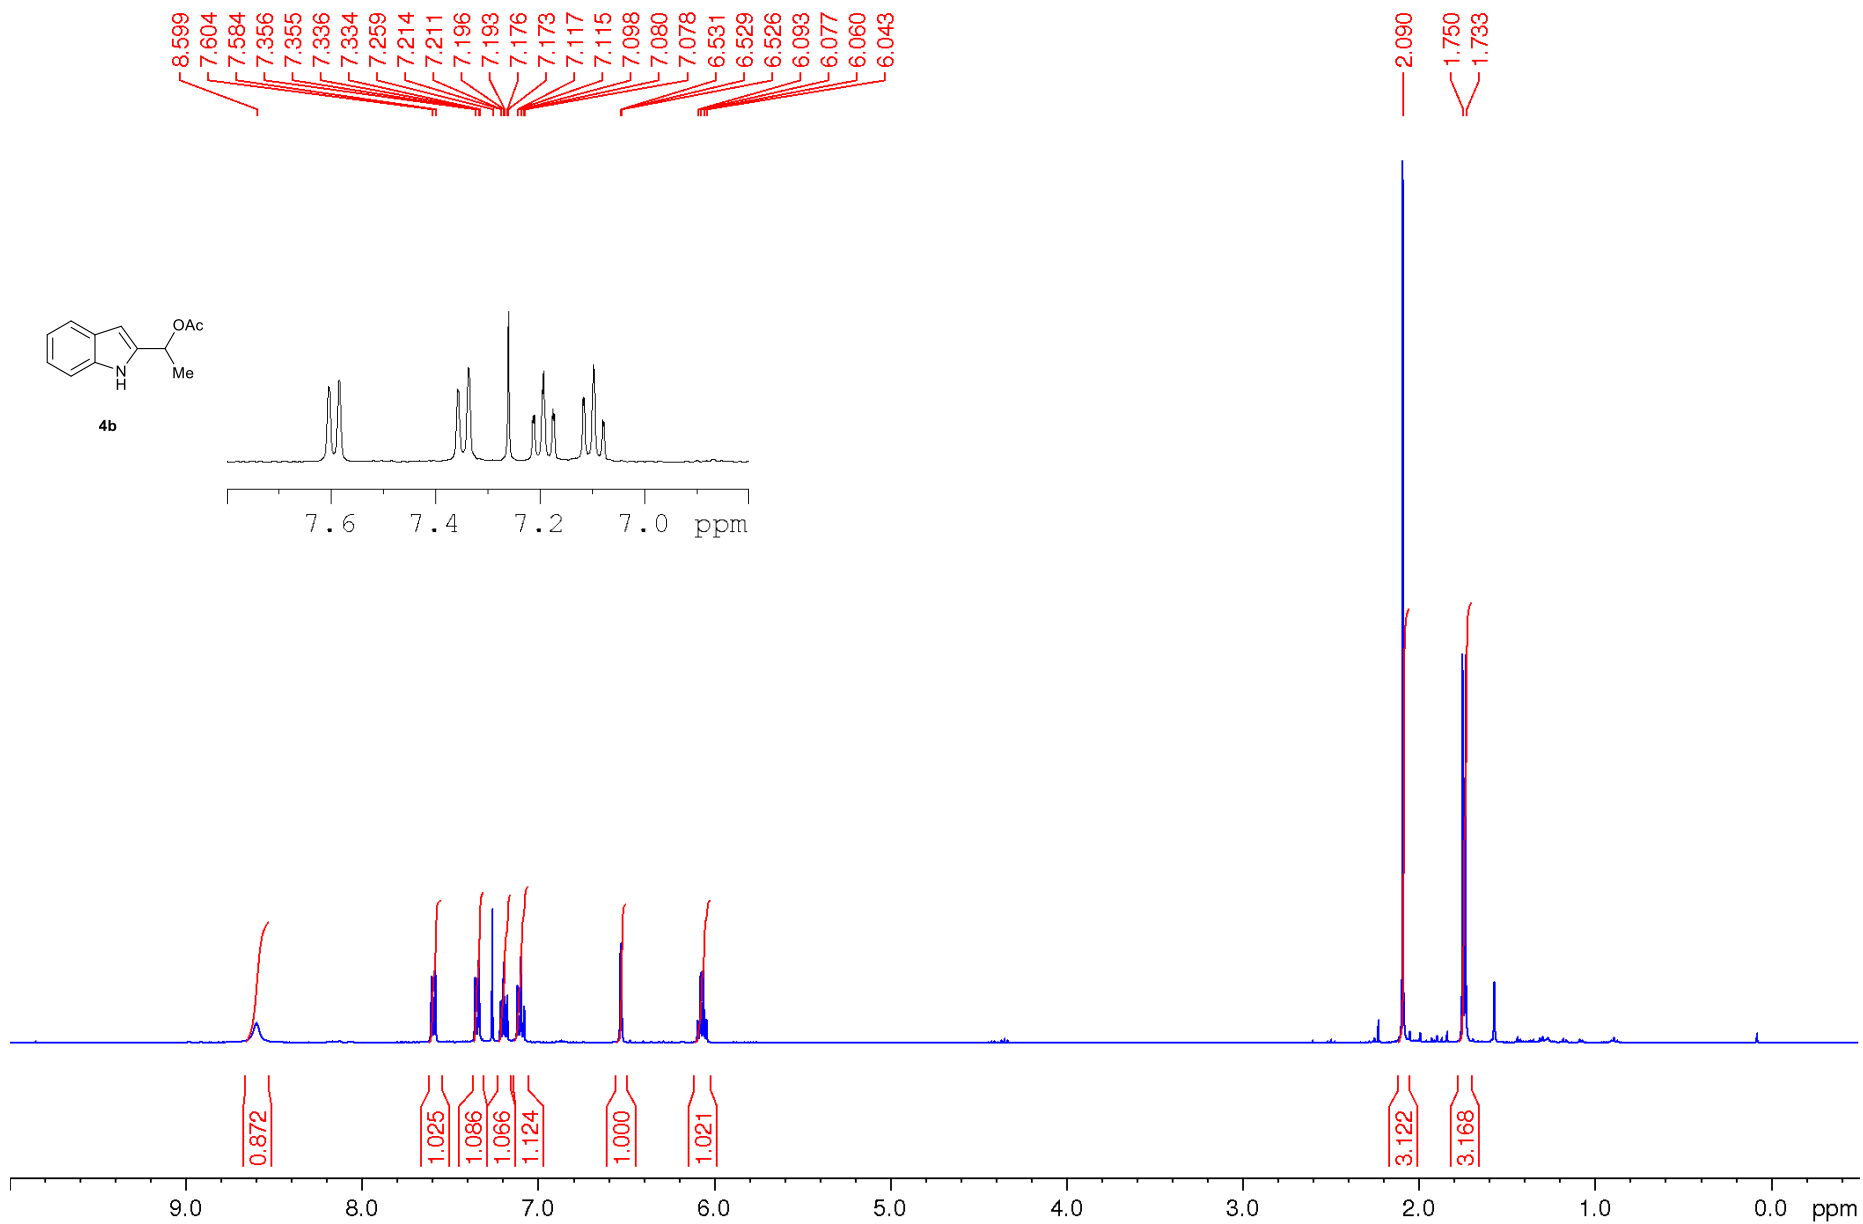



$^{13}\text{C}$  NMR-spectrum (100 MHz,  $\text{CDCl}_3$ )

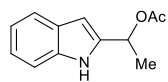

4b

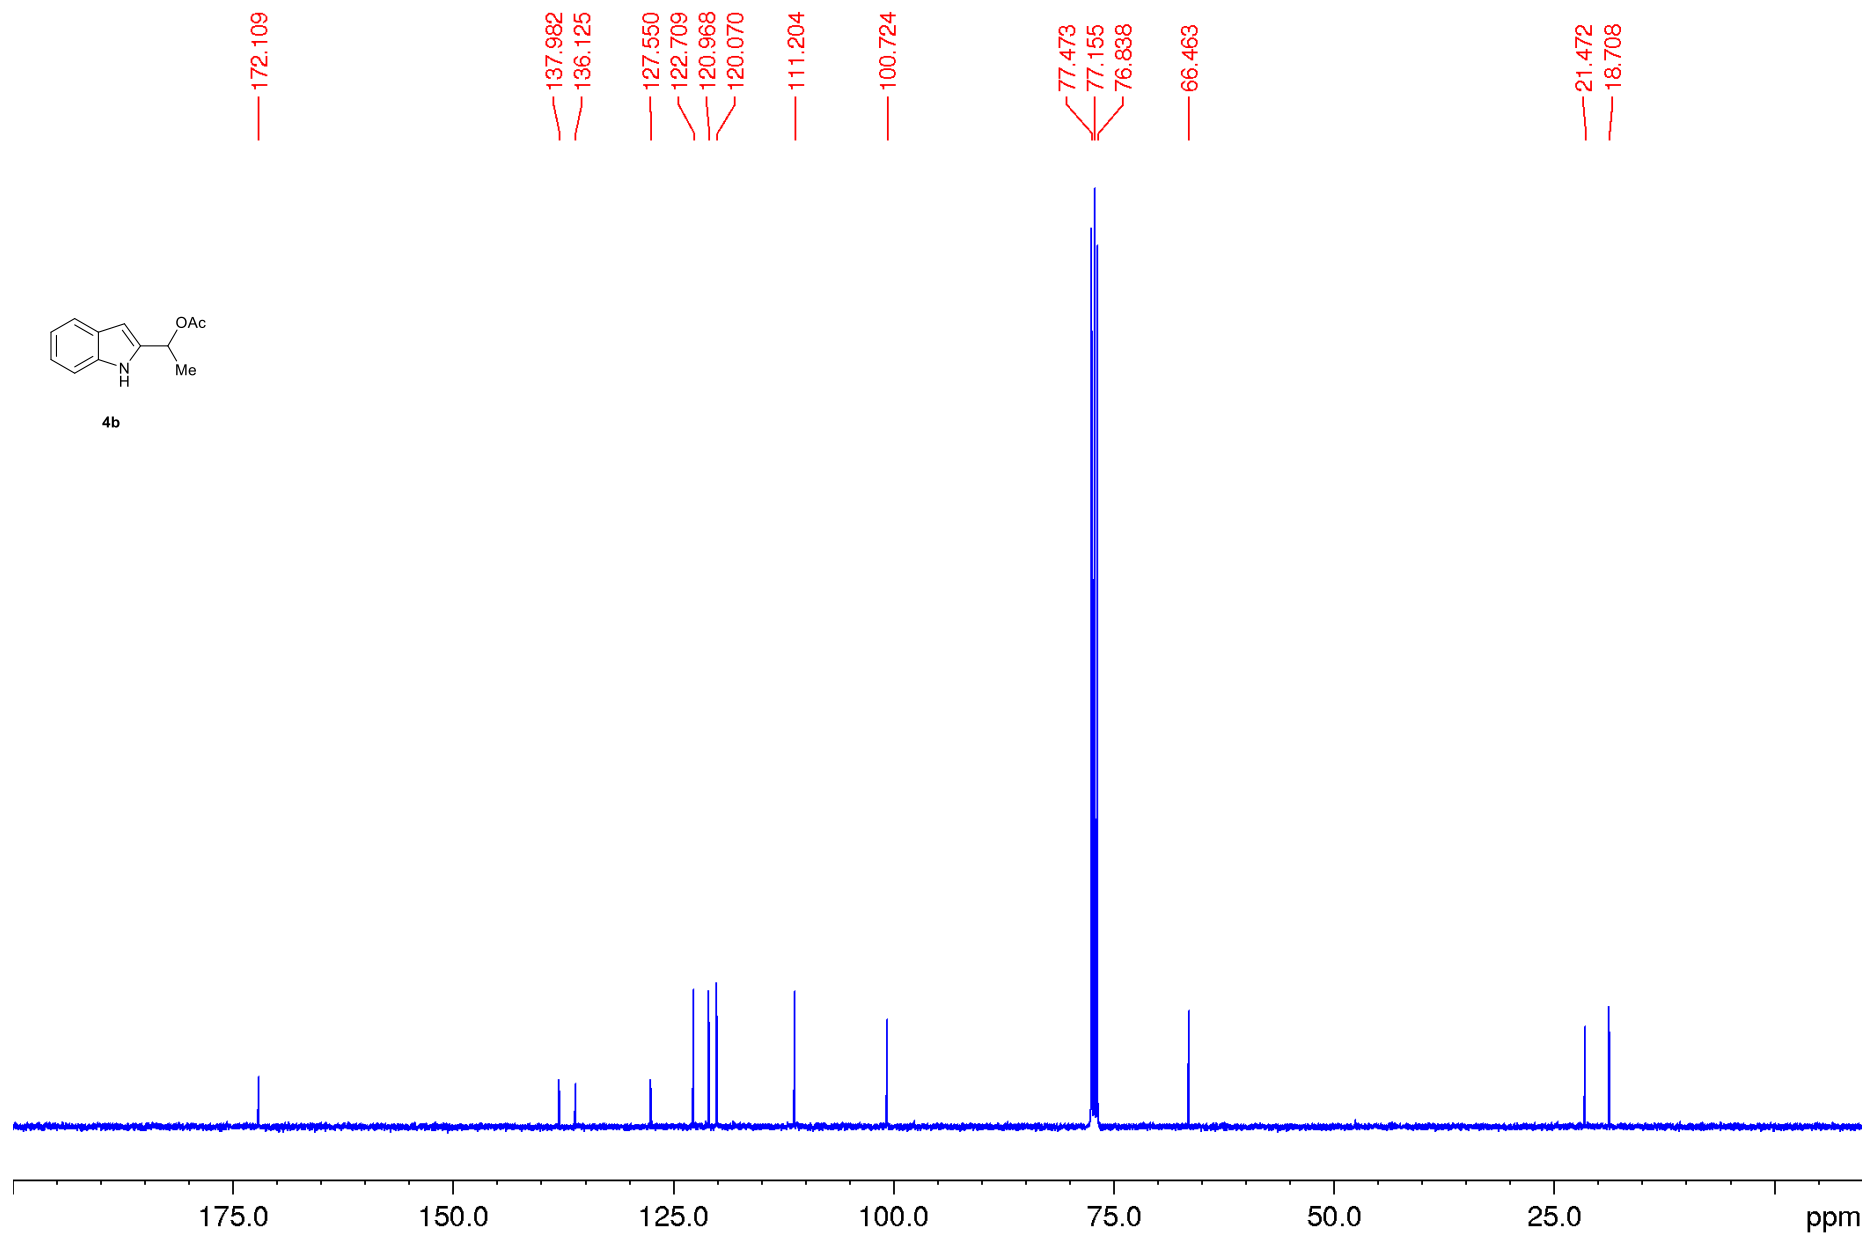

# DEPT 135 NMR-spectrum ( $\text{CDCl}_3$ )

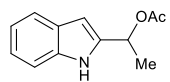

4b

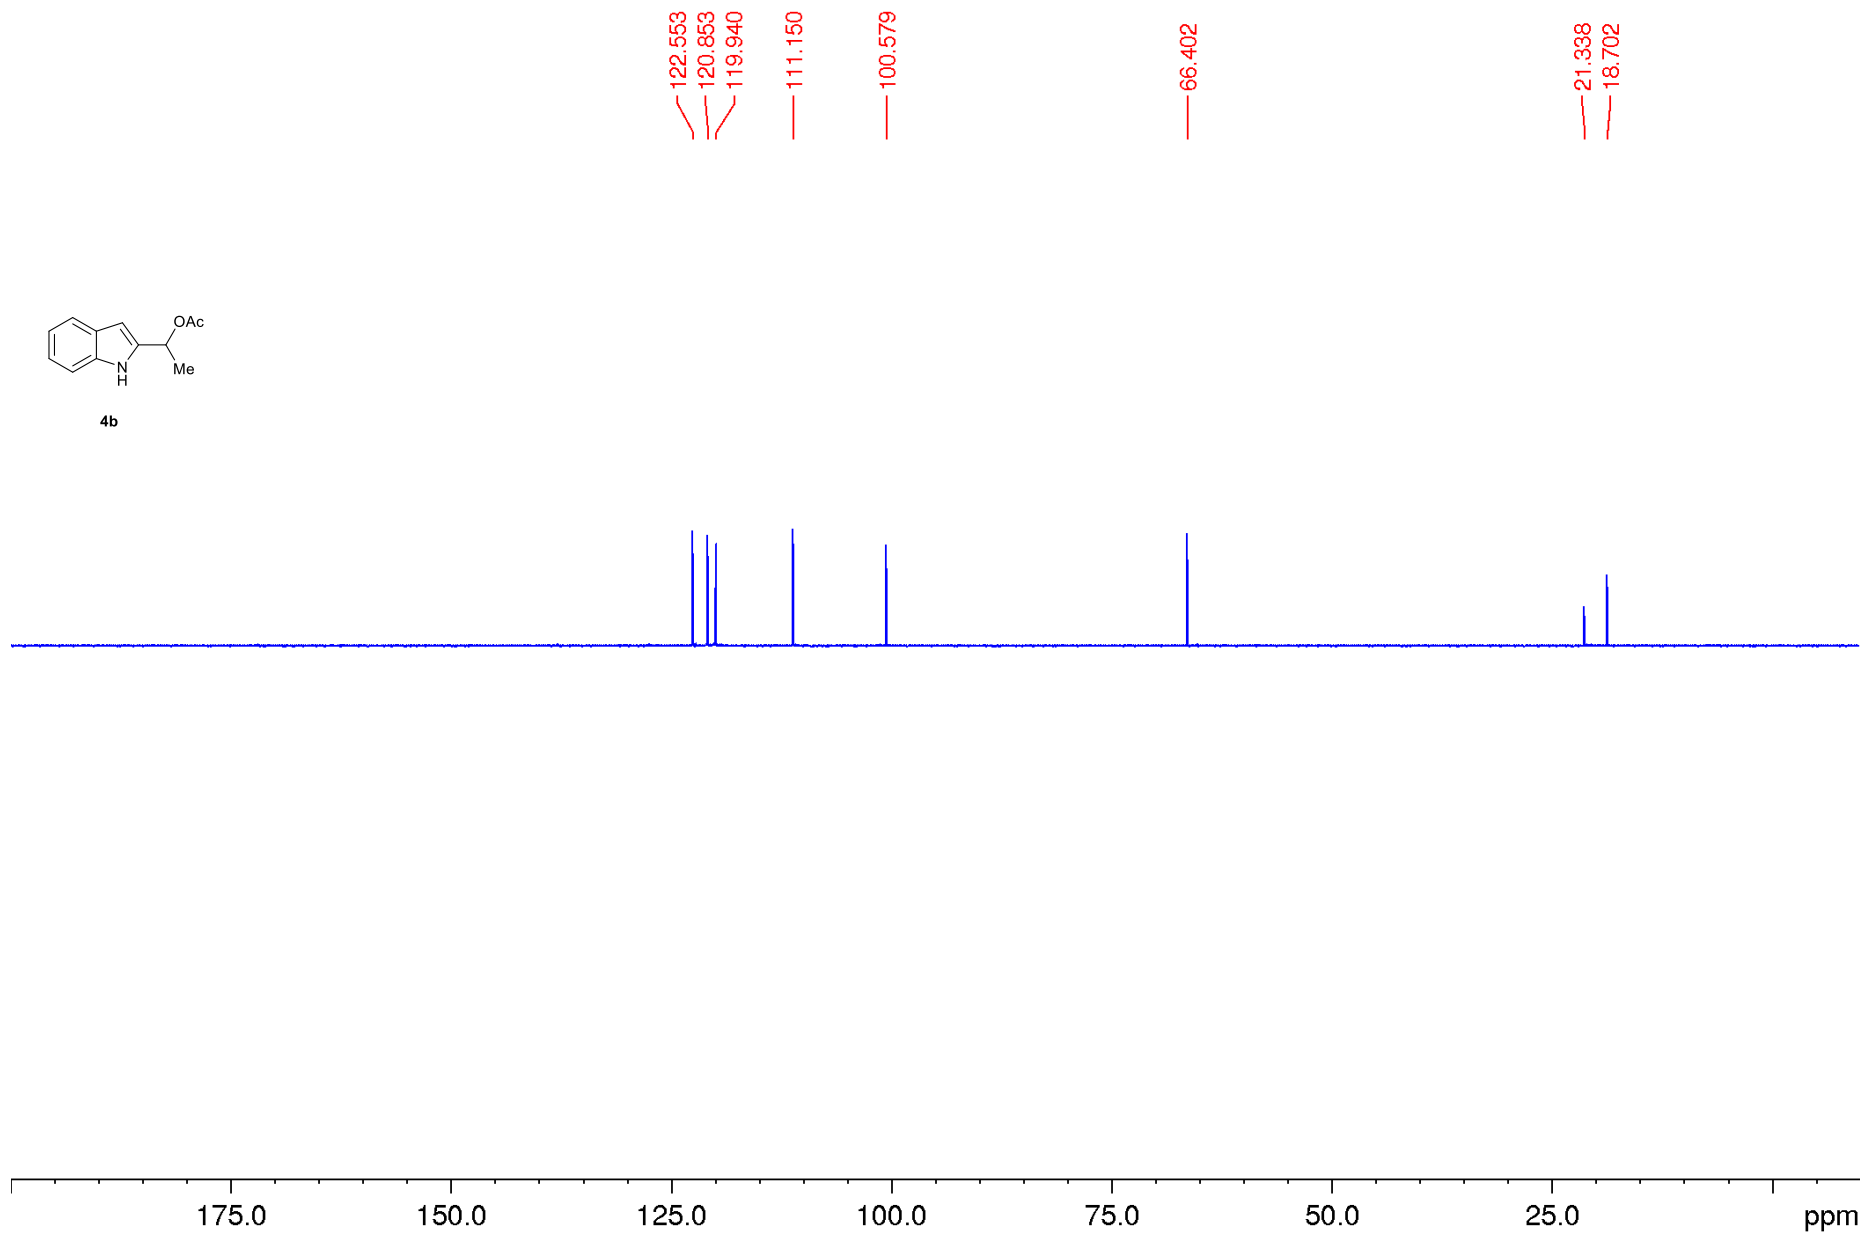

# $^1\text{H}$ NMR-spectrum (400 MHz, $\text{CDCl}_3$ )

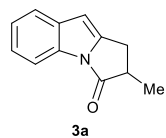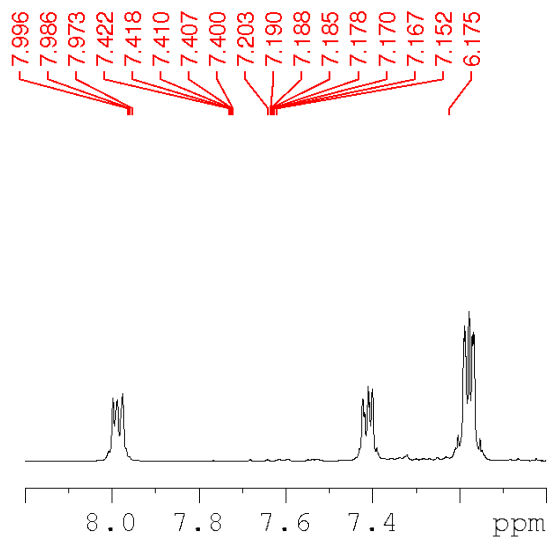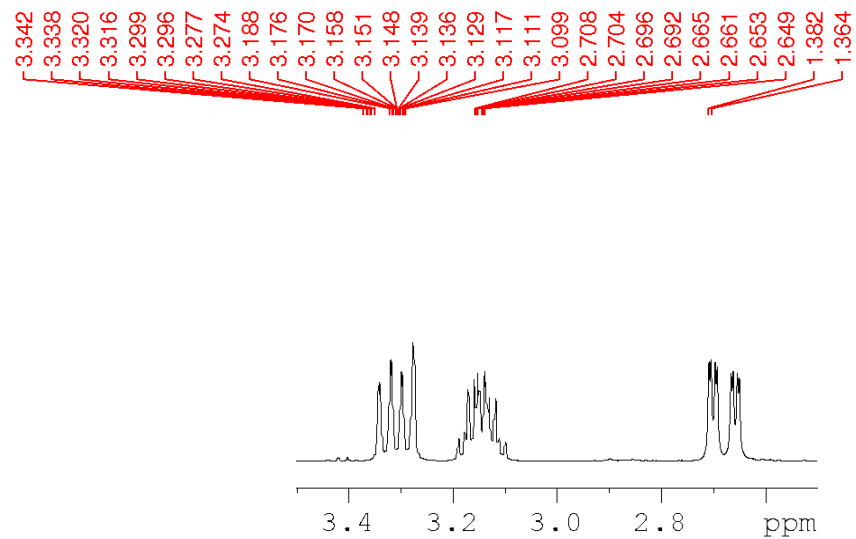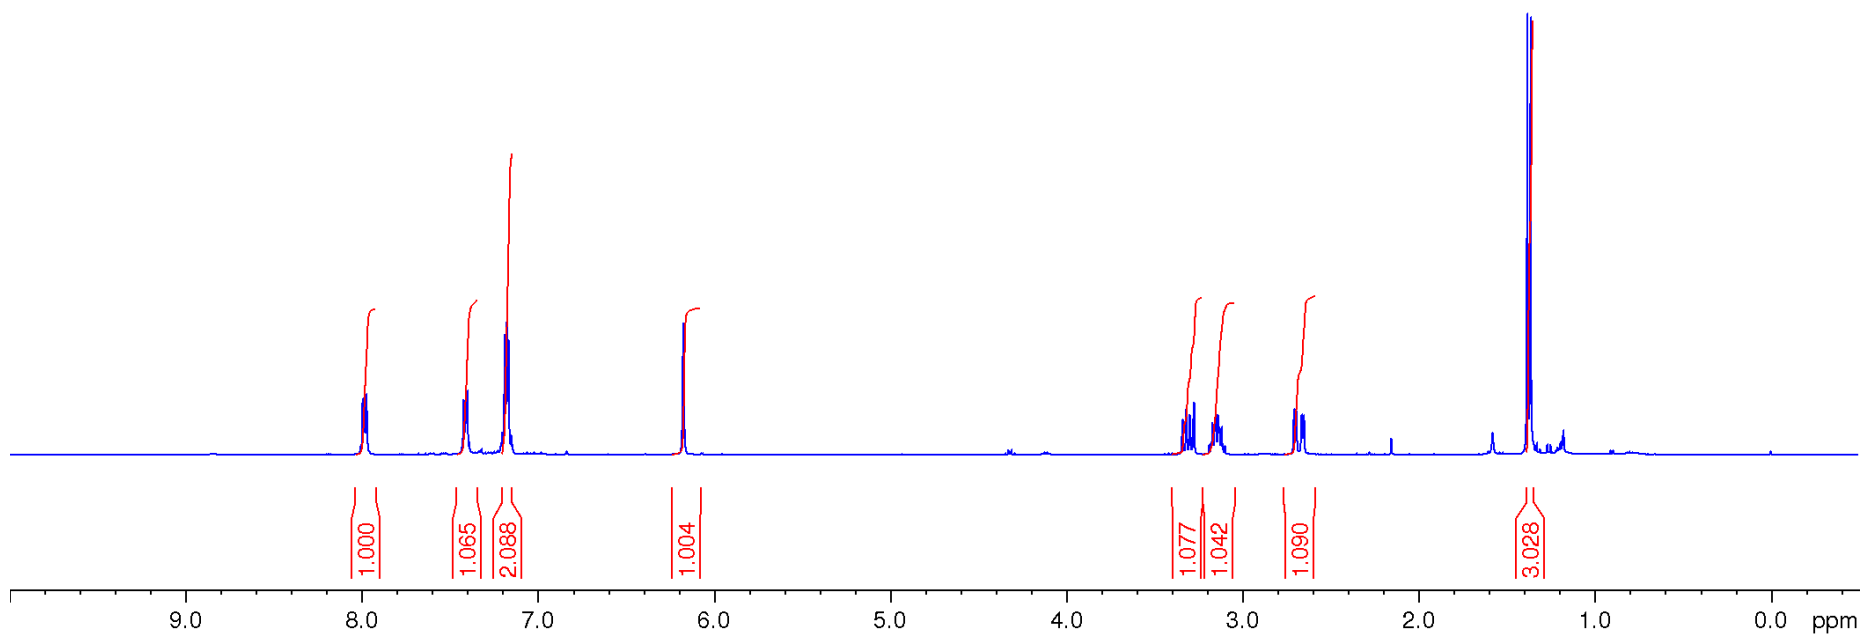

$^{13}\text{C}$  NMR-spectrum (100 MHz,  $\text{CDCl}_3$ )

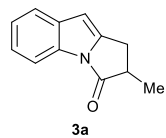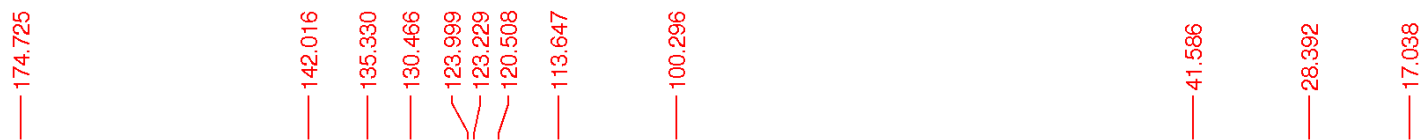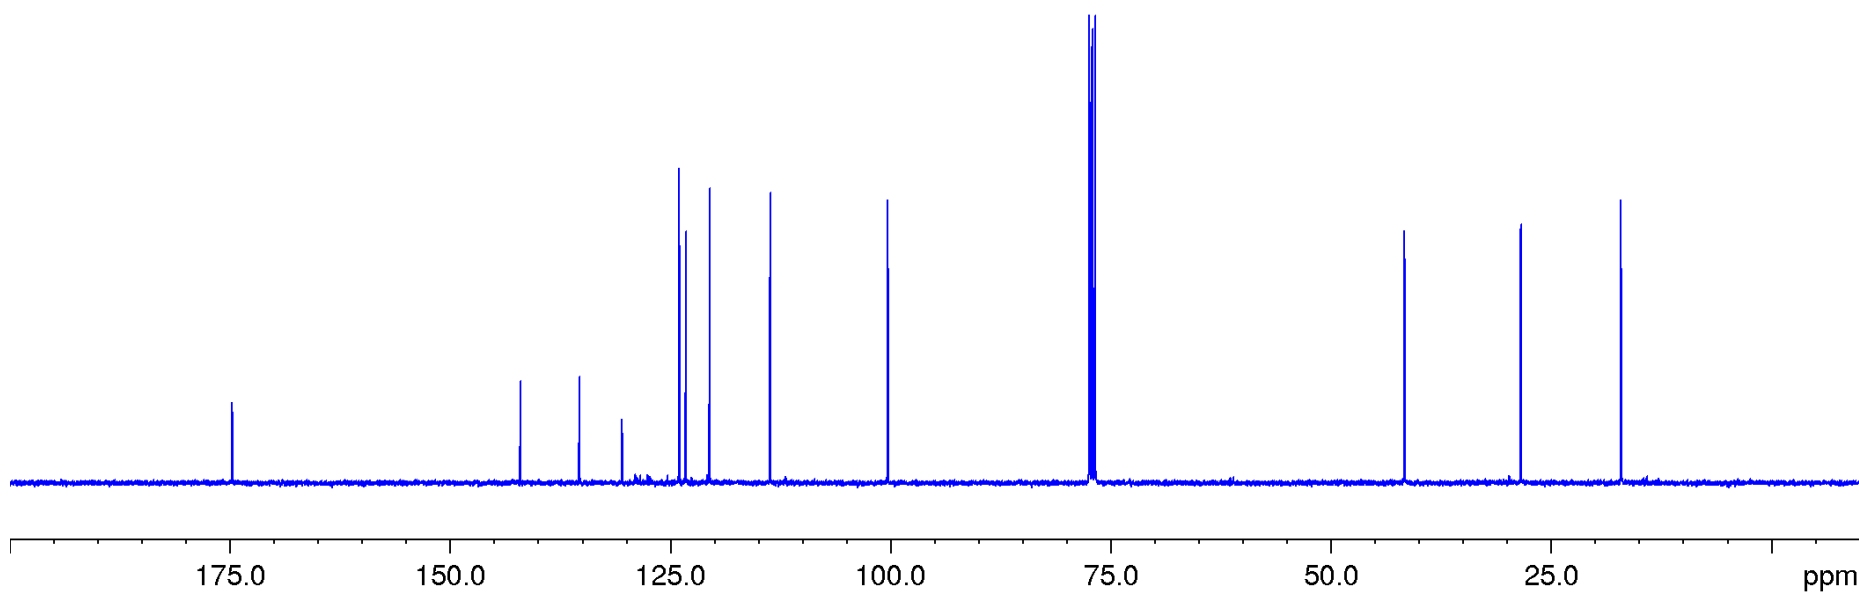

# DEPT 135 NMR-spectrum (CDCl<sub>3</sub>)

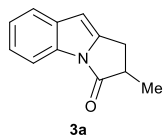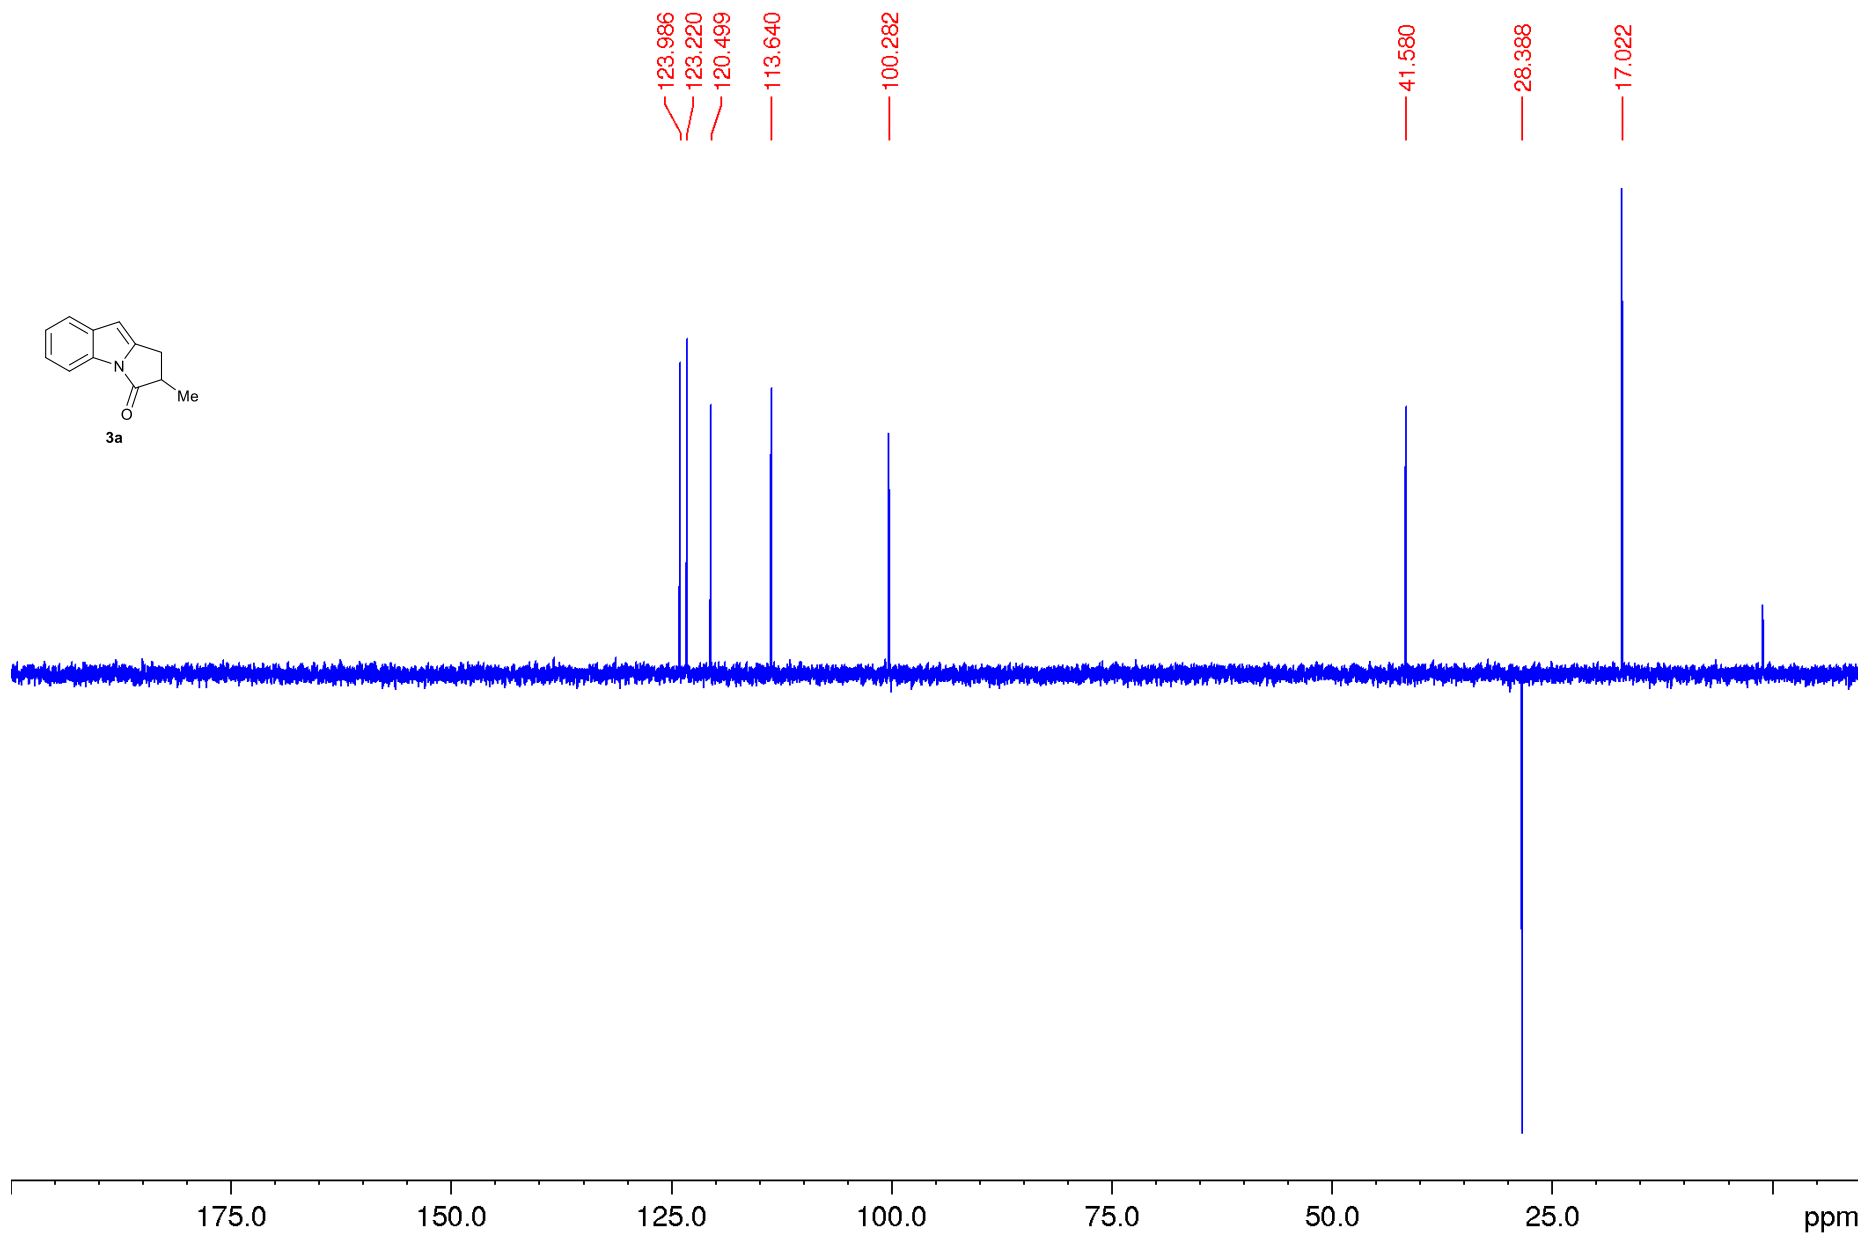

# $^1\text{H}$ NMR-spectrum (400 MHz, $\text{CDCl}_3$ )

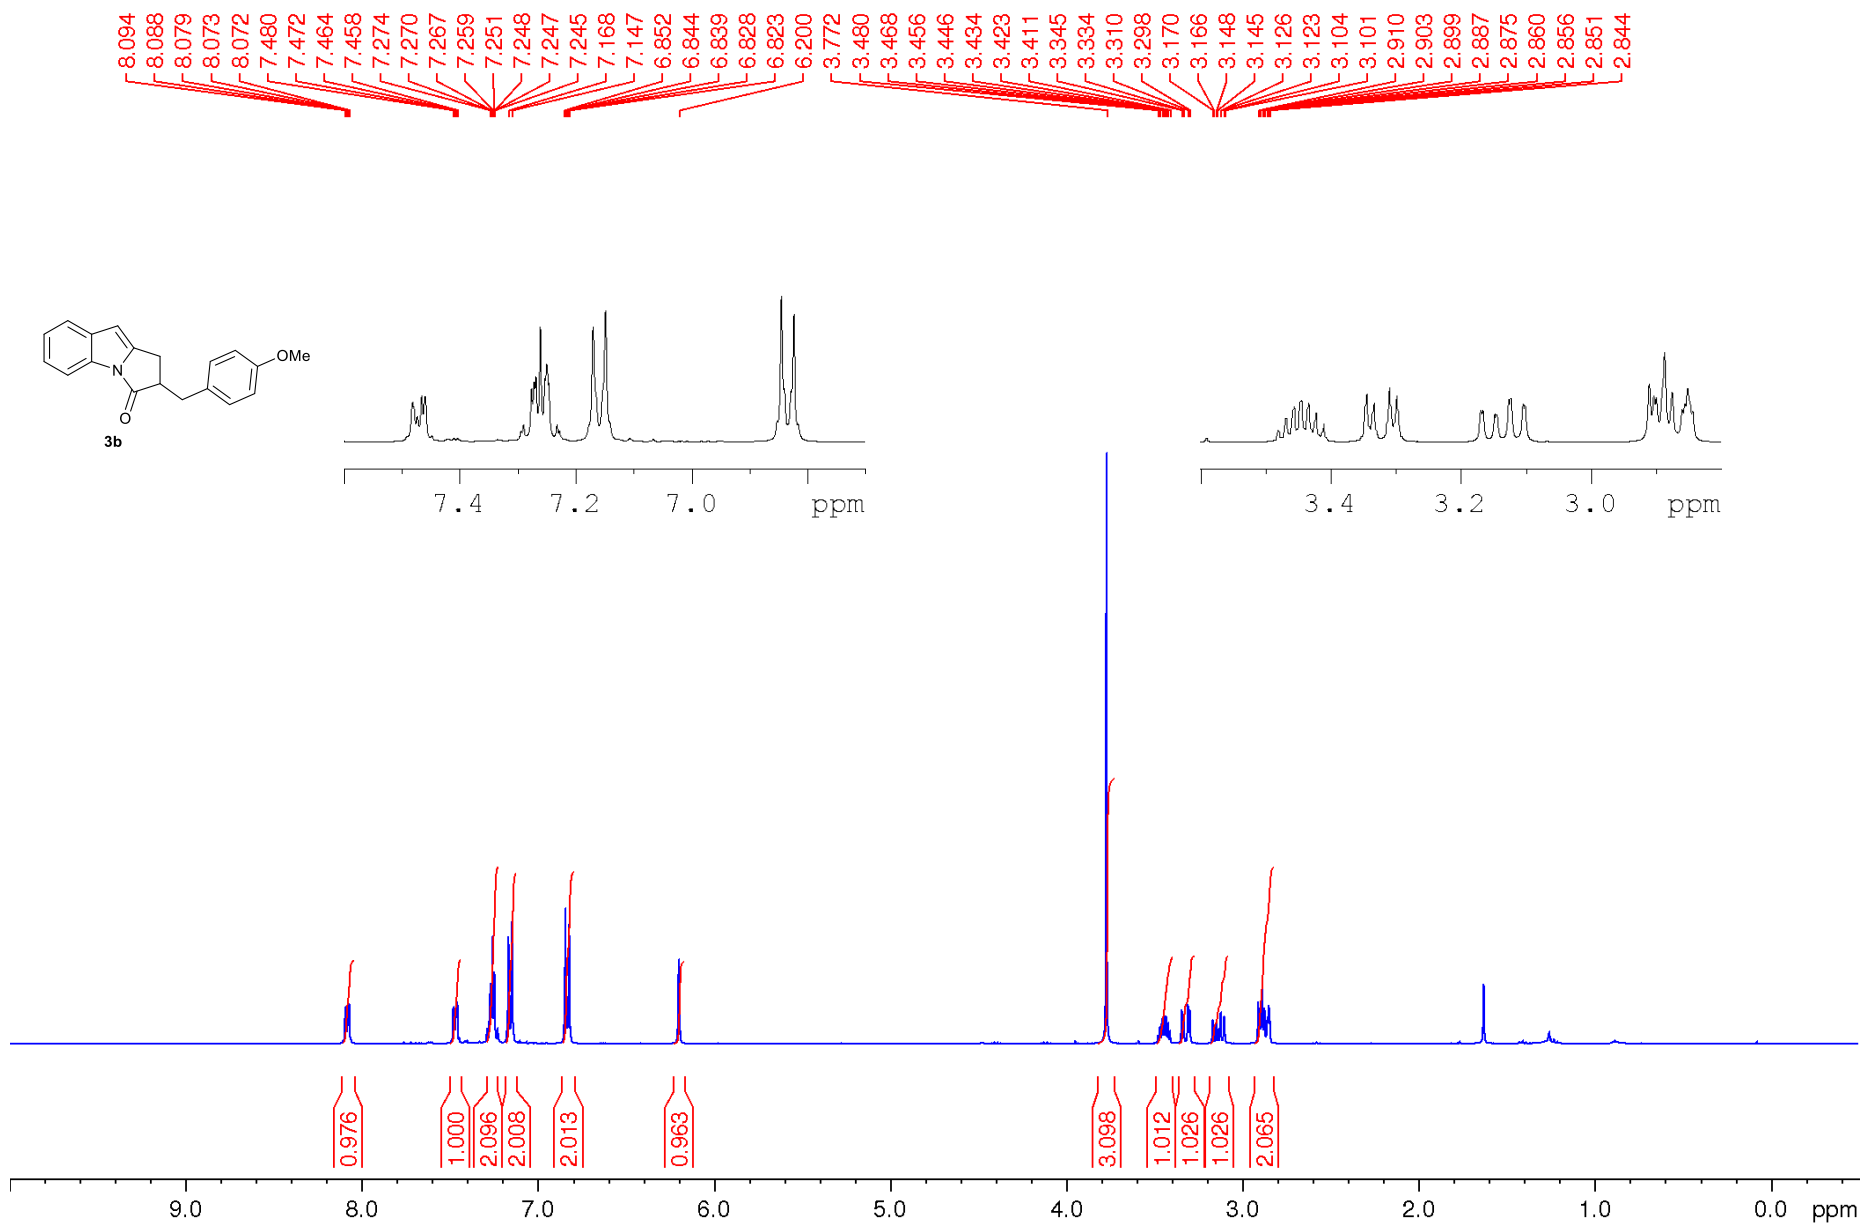

$^{13}\text{C}$  NMR-spectrum (100 MHz,  $\text{CDCl}_3$ )

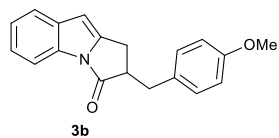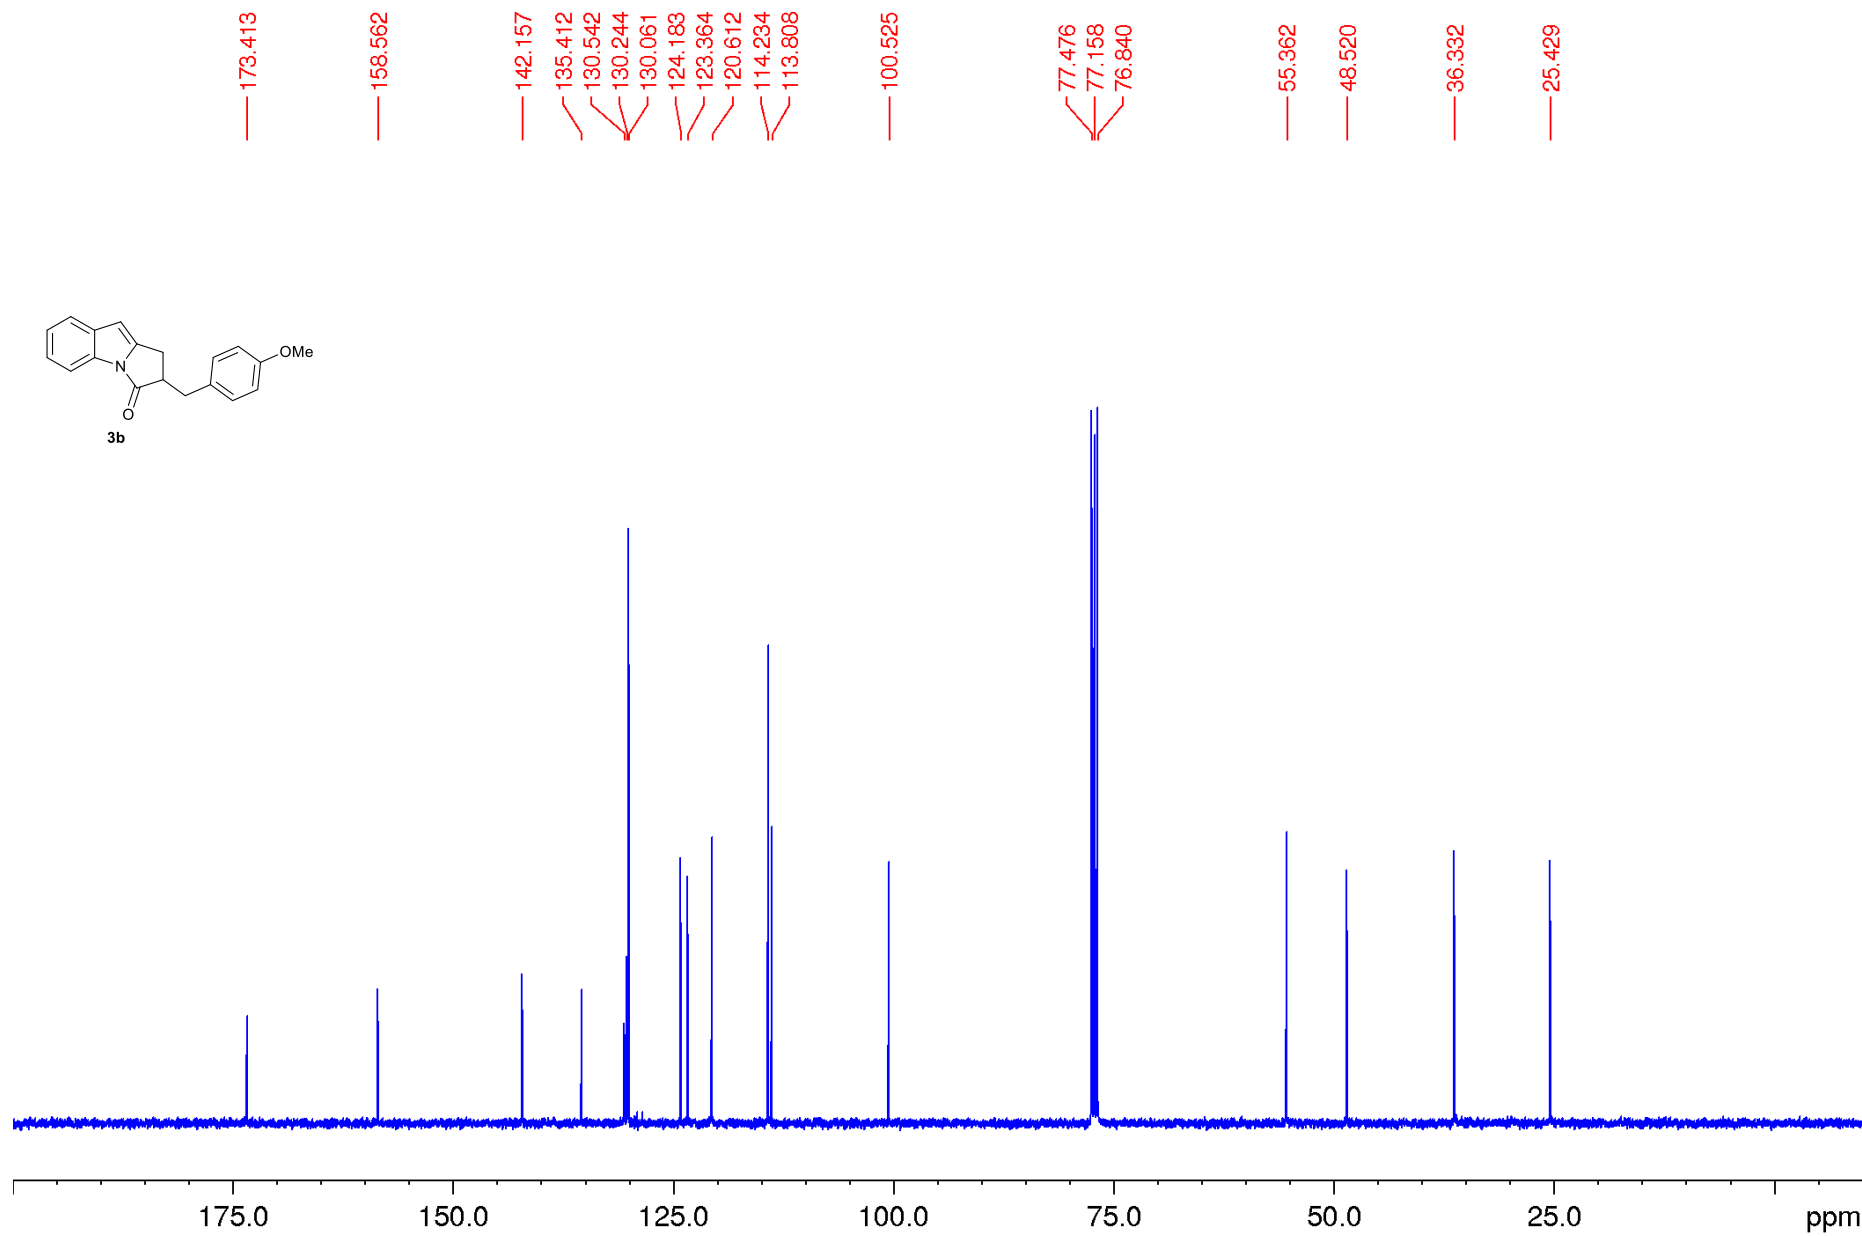

# DEPT 135 NMR-spectrum (CDCl<sub>3</sub>)

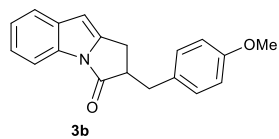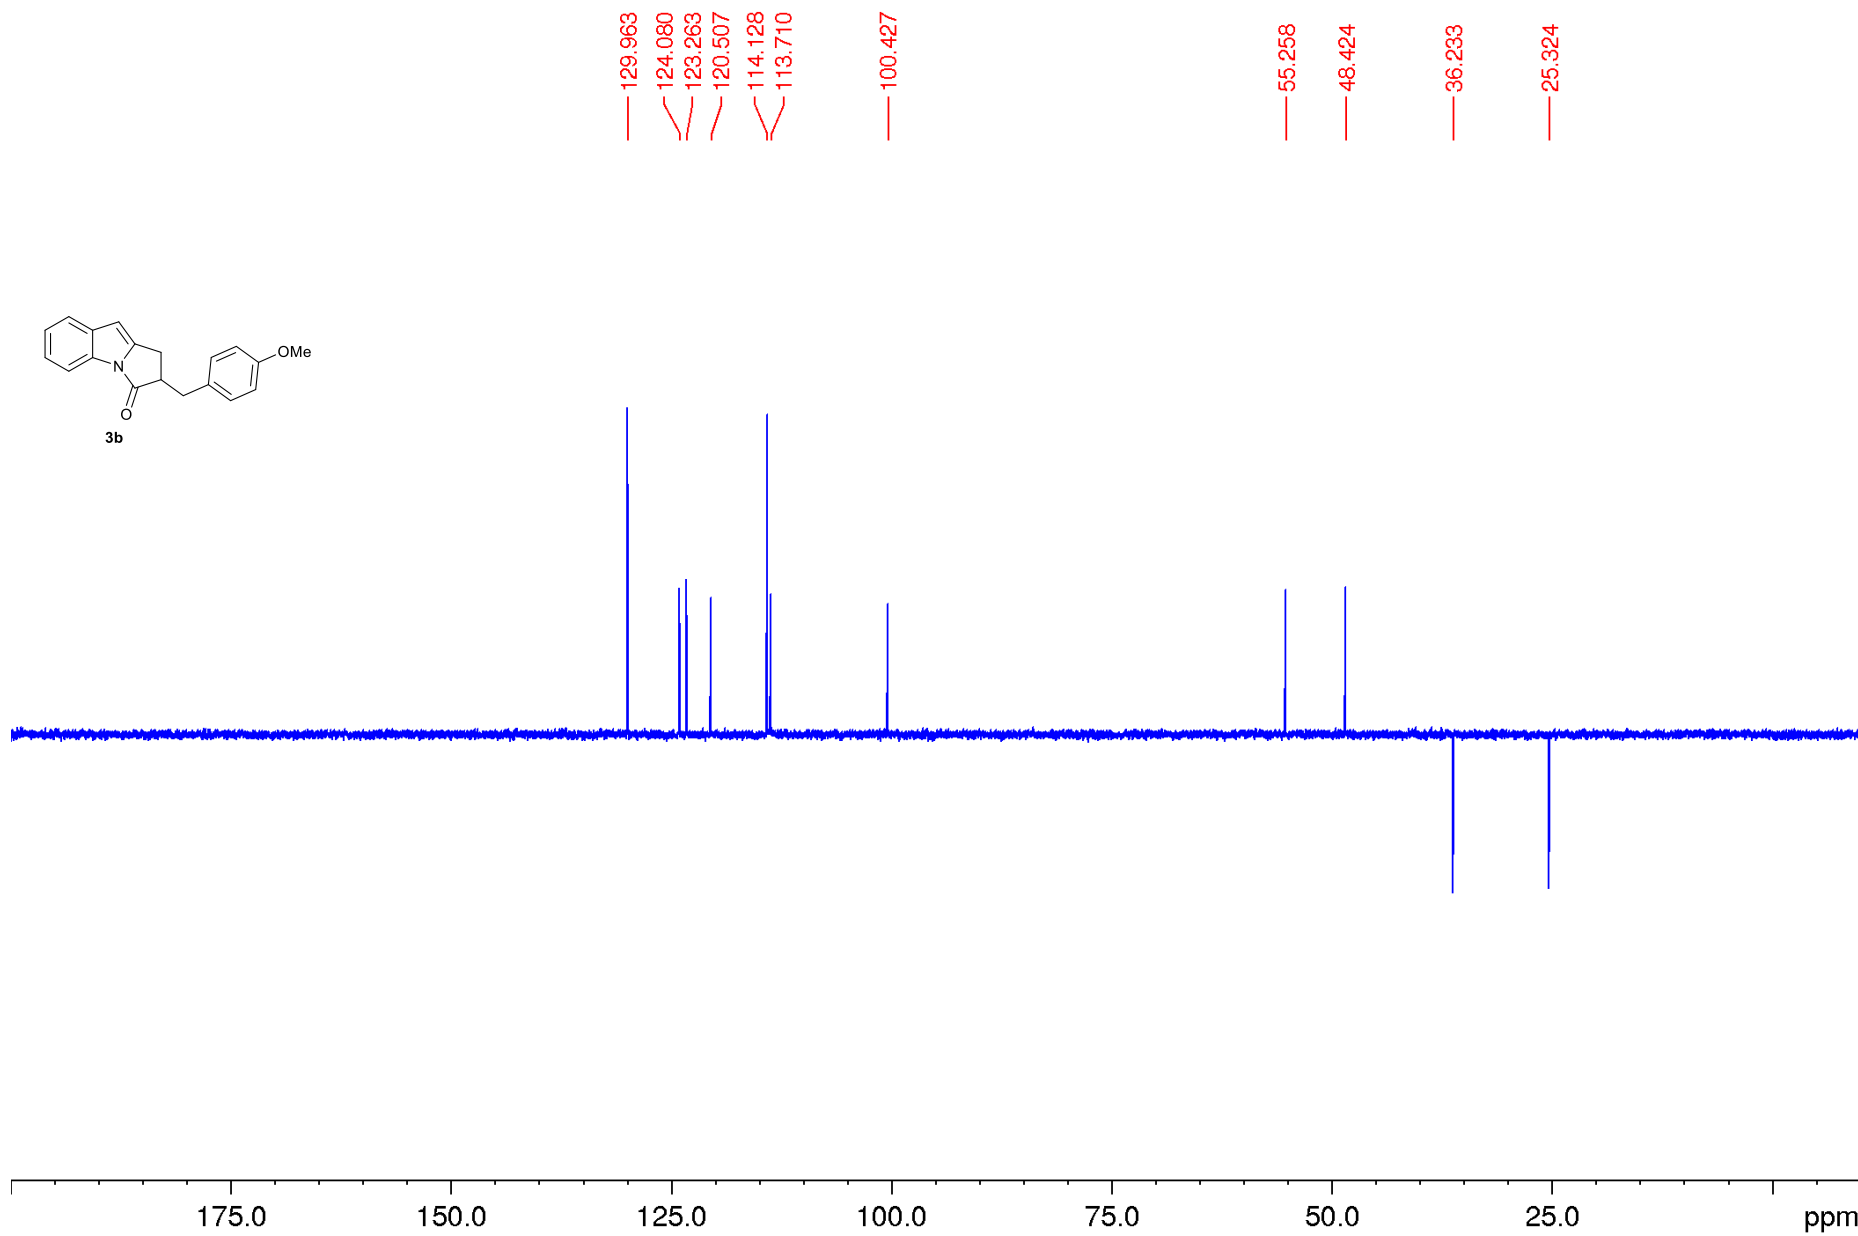



# <sup>1</sup>H NMR-spectrum (400 MHz, CDCl<sub>3</sub>)

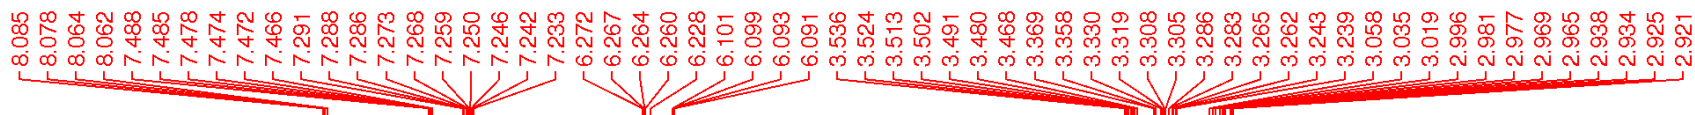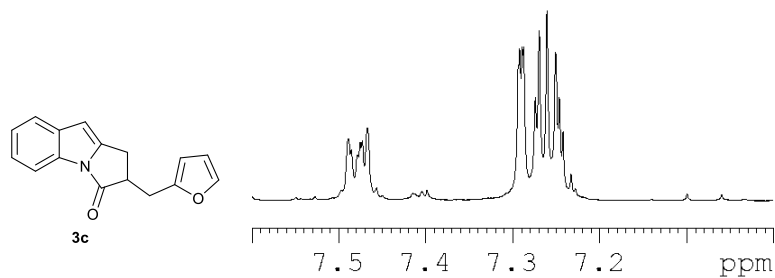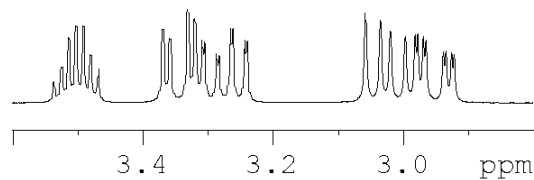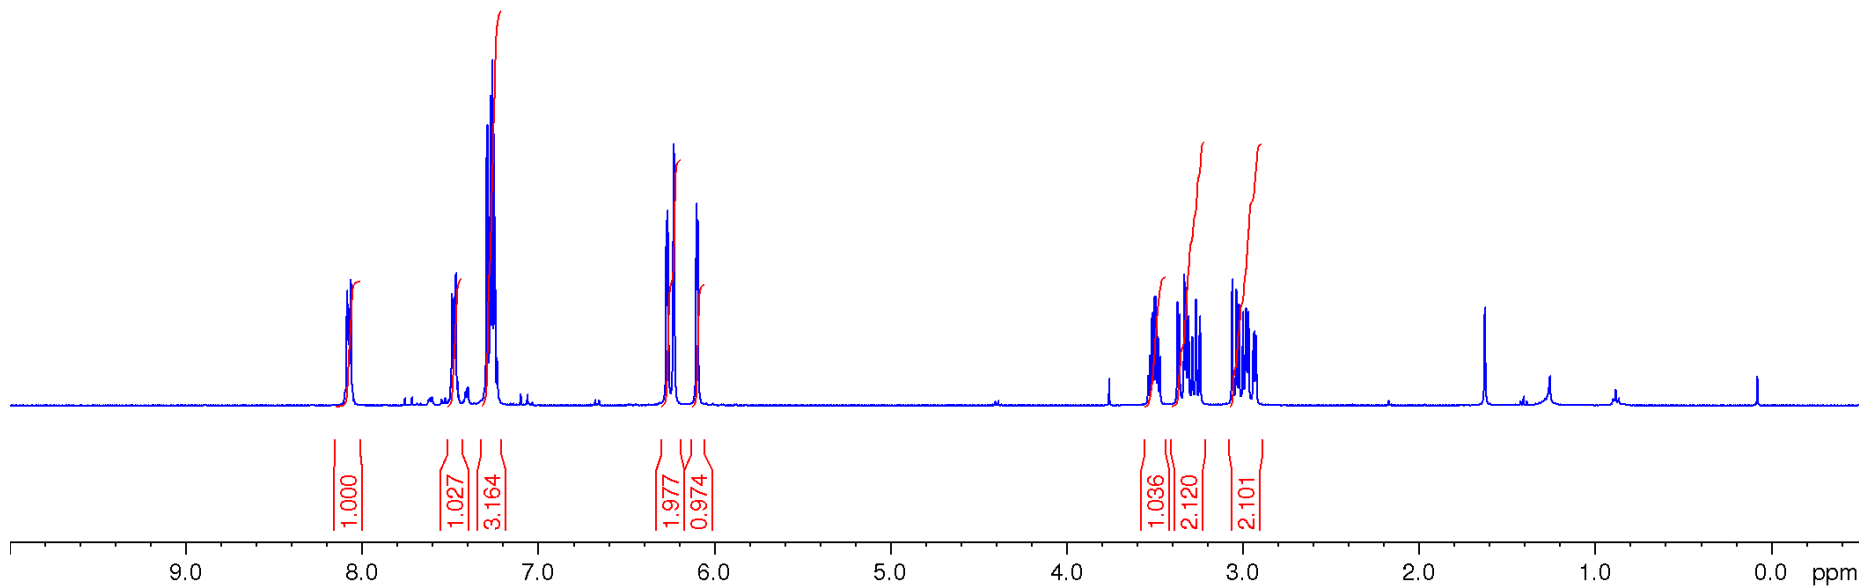

$^{13}\text{C}$  NMR-spectrum (100 MHz,  $\text{CDCl}_3$ )

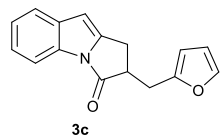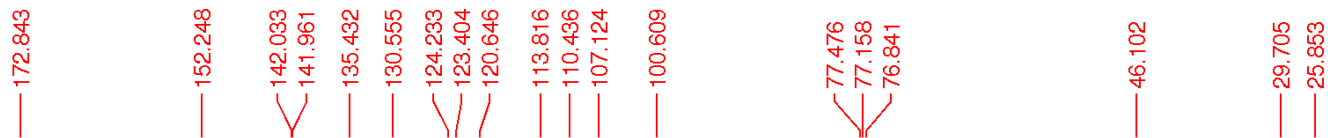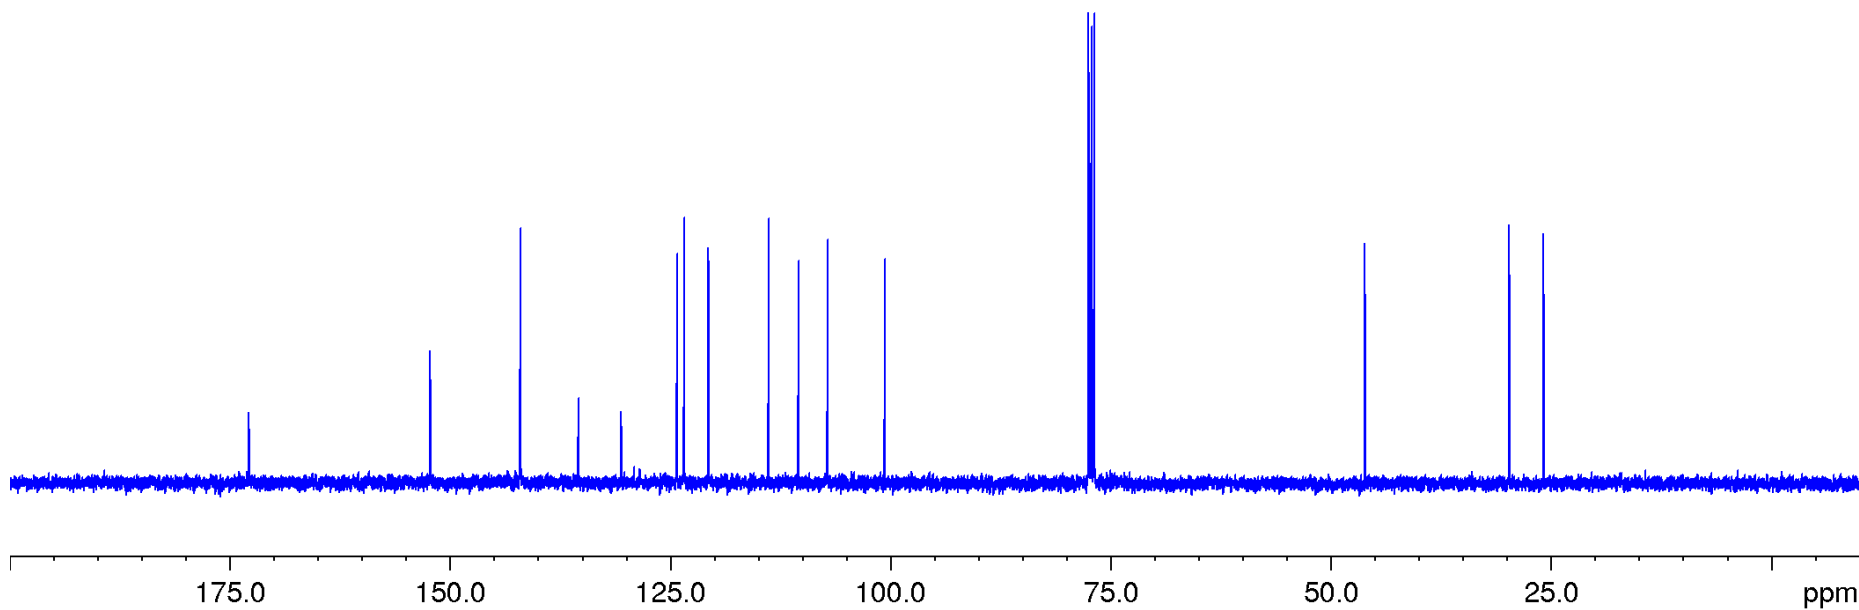

# DEPT 135 NMR-spectrum (CDCl<sub>3</sub>)

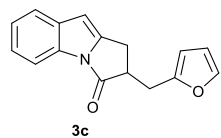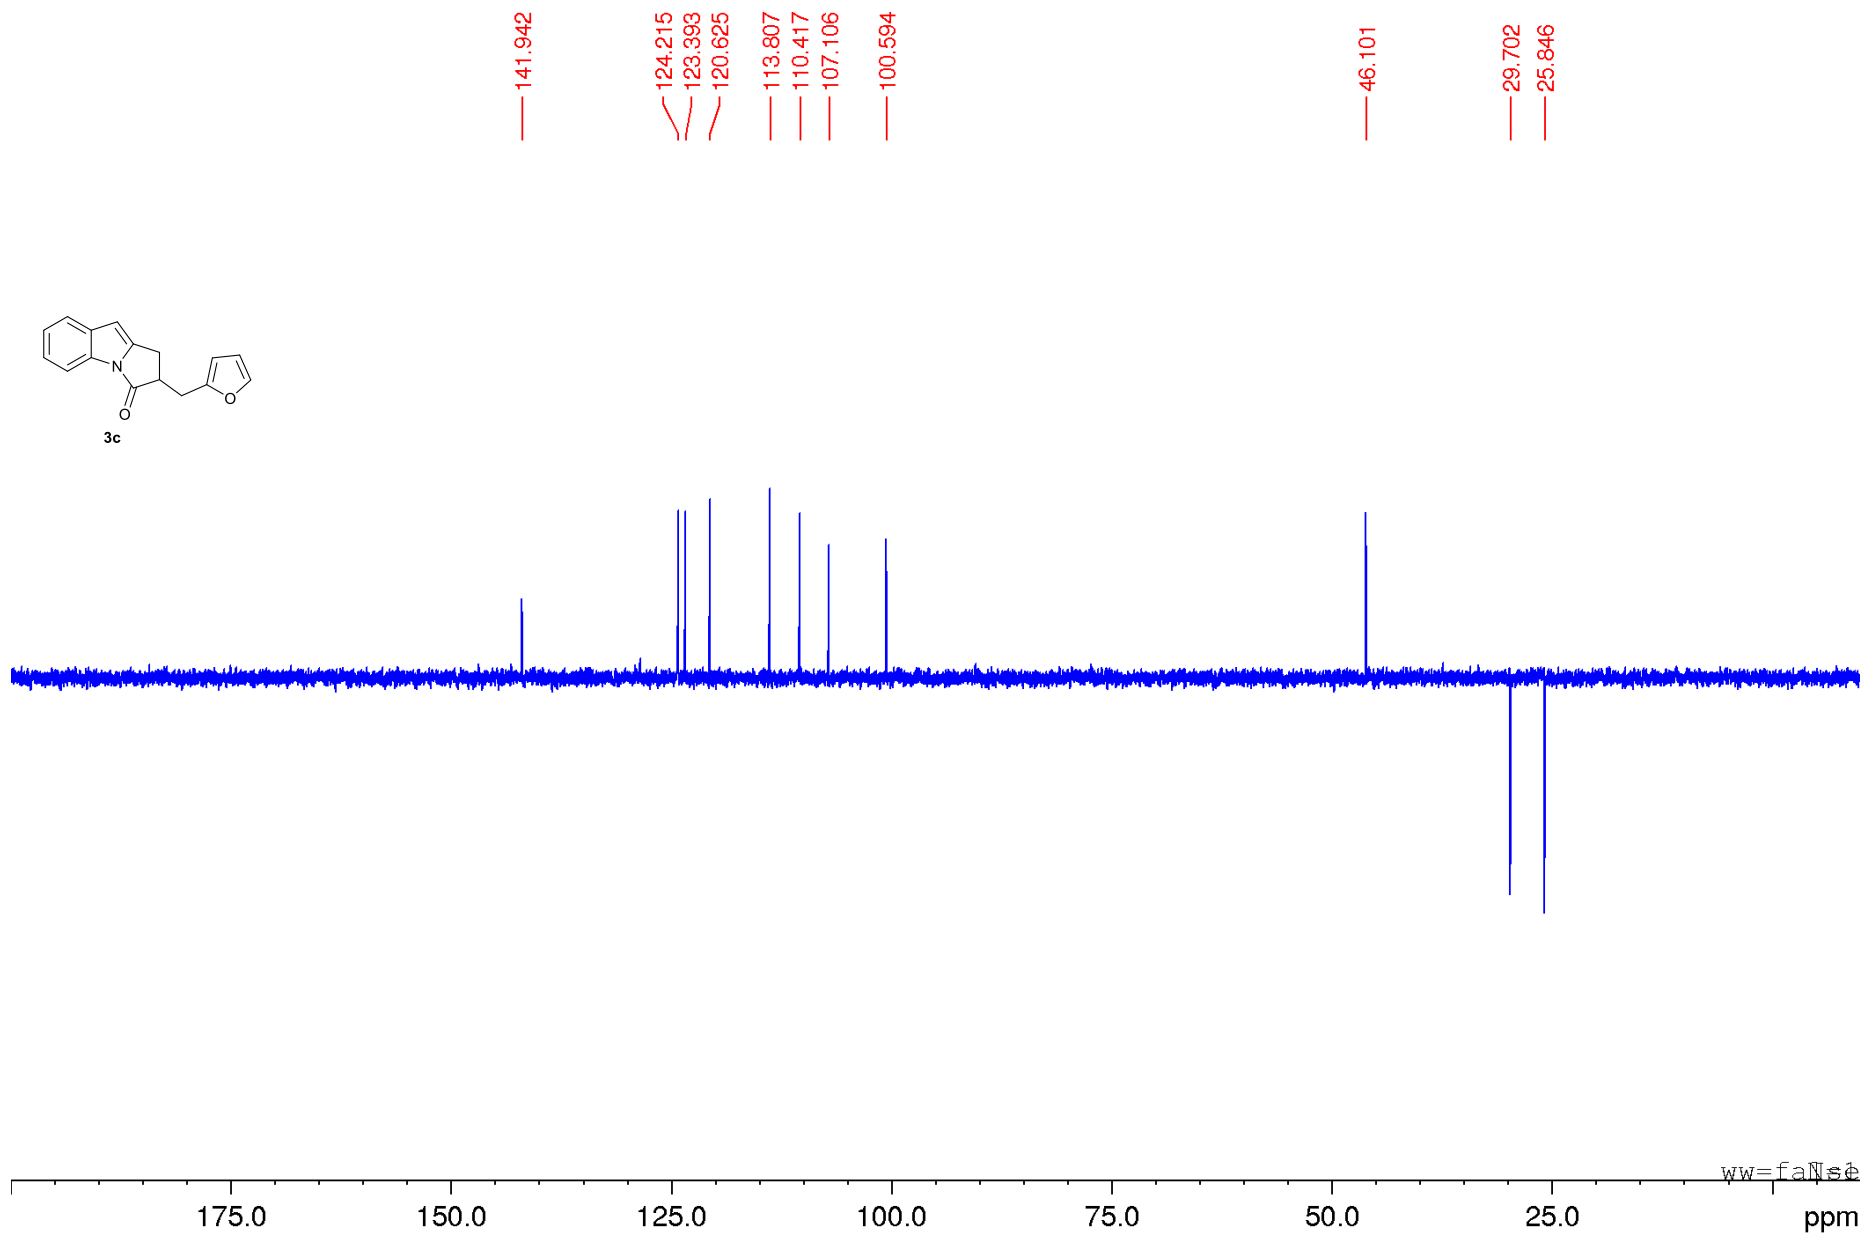

# $^1\text{H}$ NMR-spectrum (400 MHz, $\text{CDCl}_3$ )

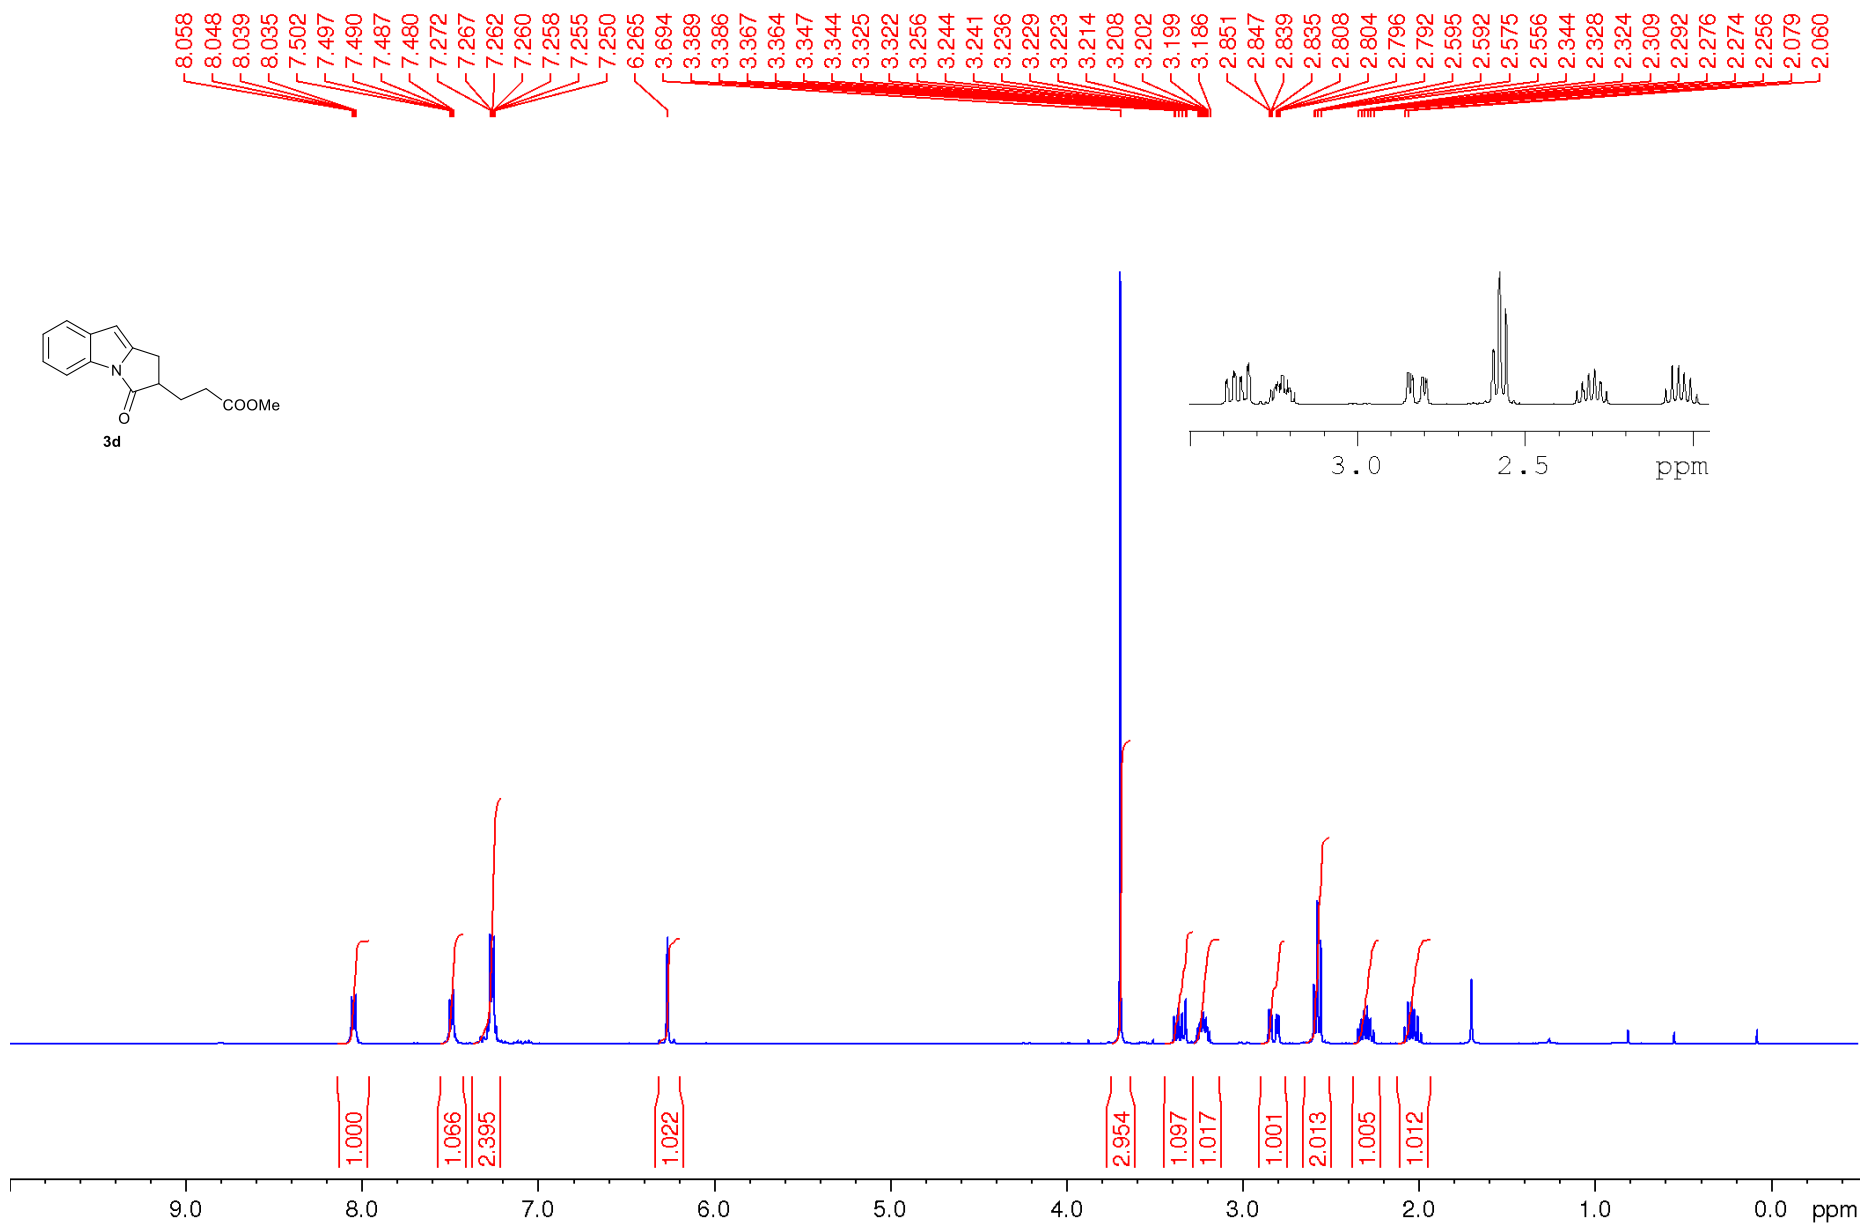

$^{13}\text{C}$  NMR-spectrum (100 MHz,  $\text{CDCl}_3$ )

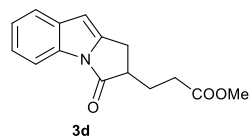

173.304  
173.253

141.745

135.374

130.535

124.223

123.445

120.669

113.777

100.608

77.475

77.158

76.840

51.868

45.777

31.418

27.128

26.437

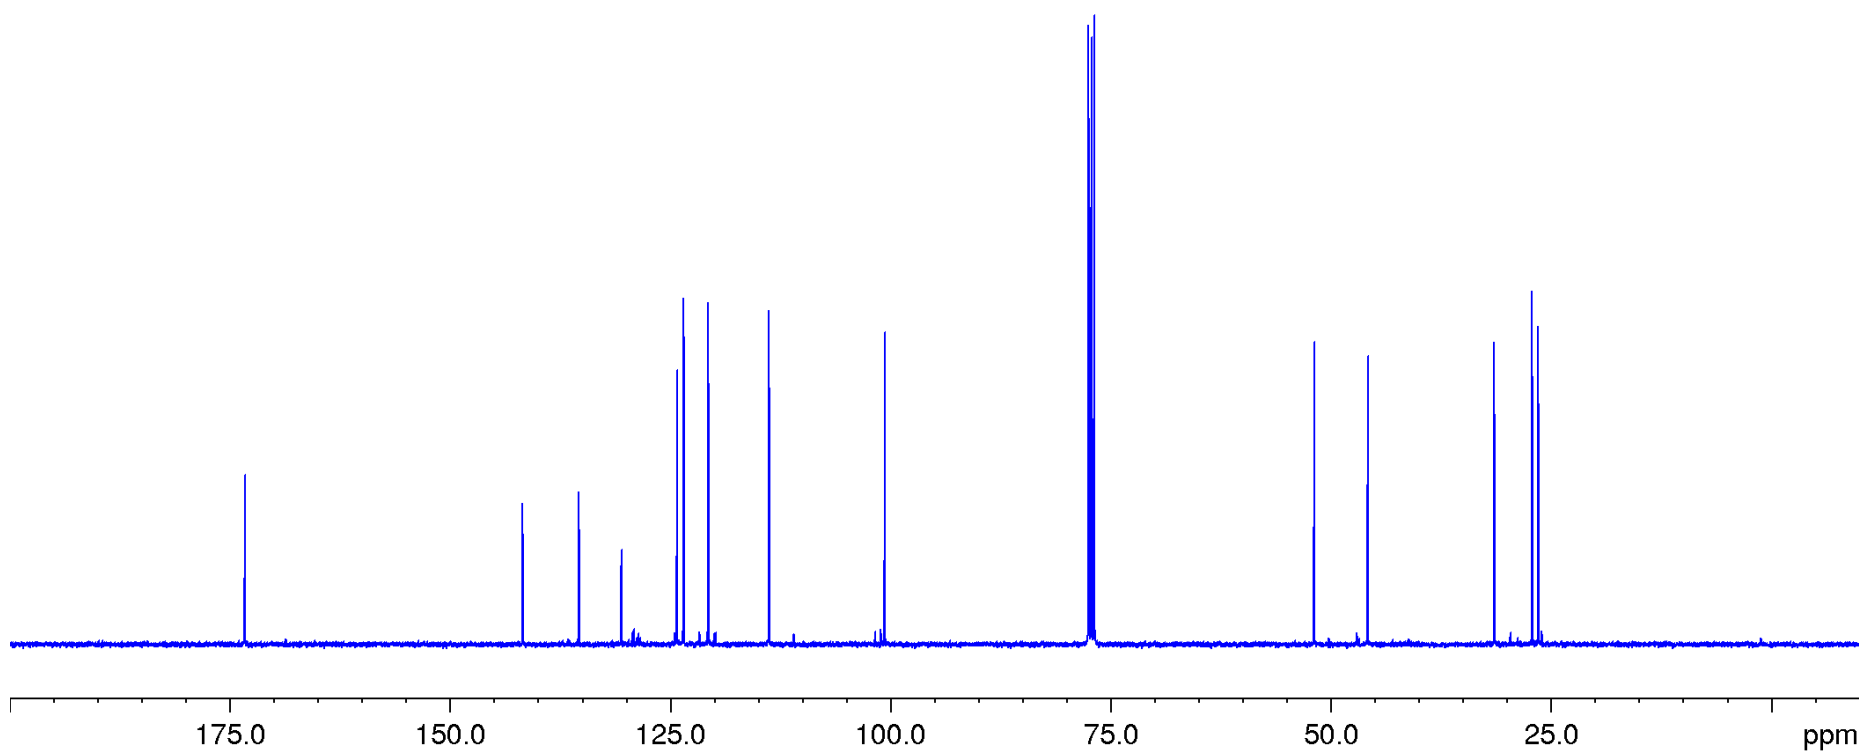

# DEPT 135 NMR-spectrum (CDCl<sub>3</sub>)

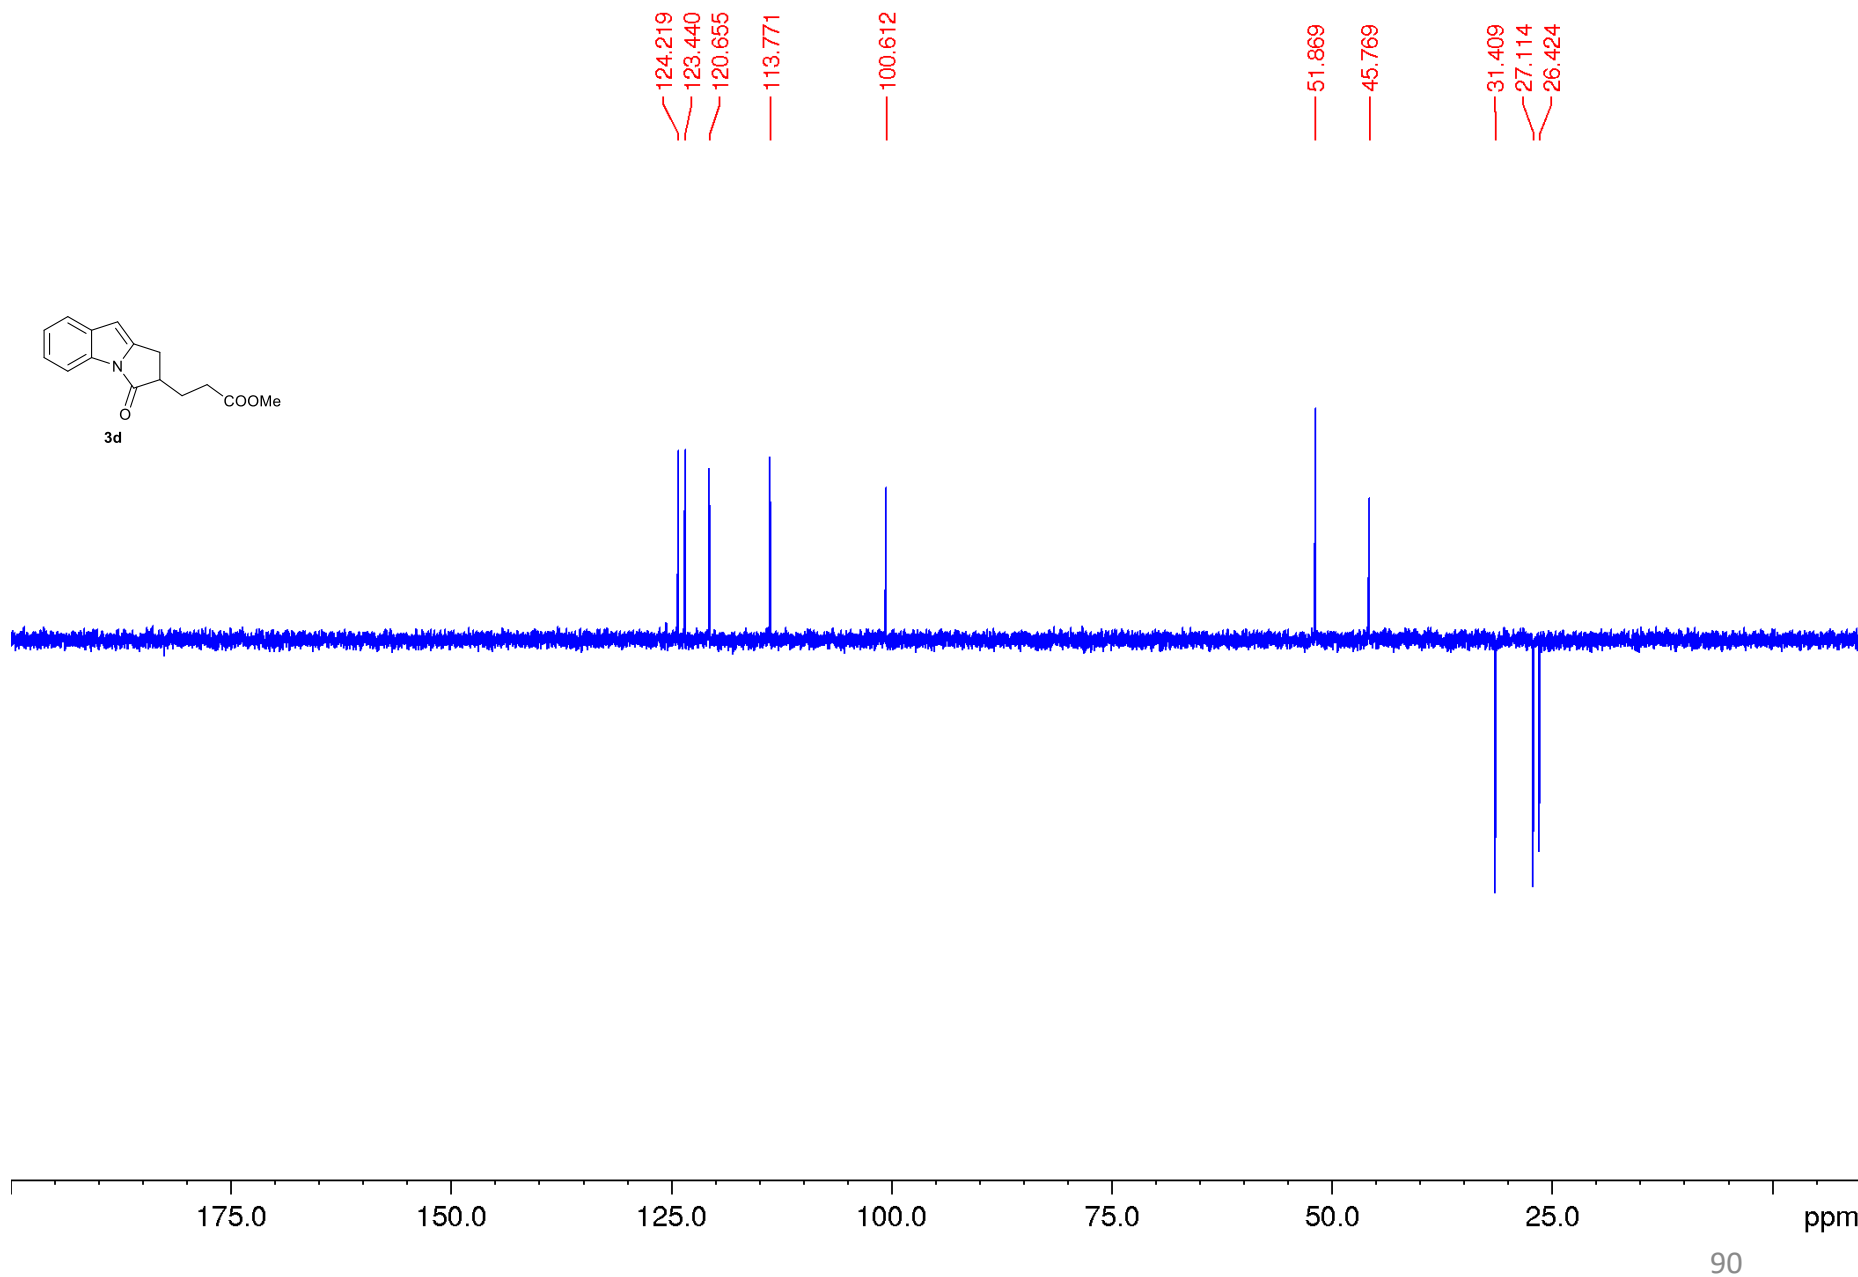

# $^1\text{H}$ NMR-spectrum (400 MHz, $\text{CDCl}_3$ )

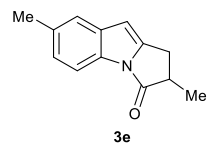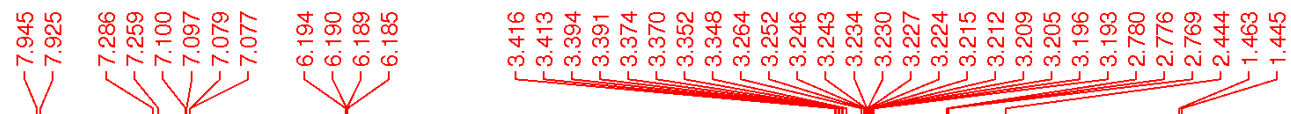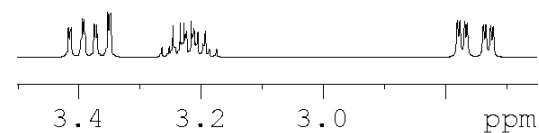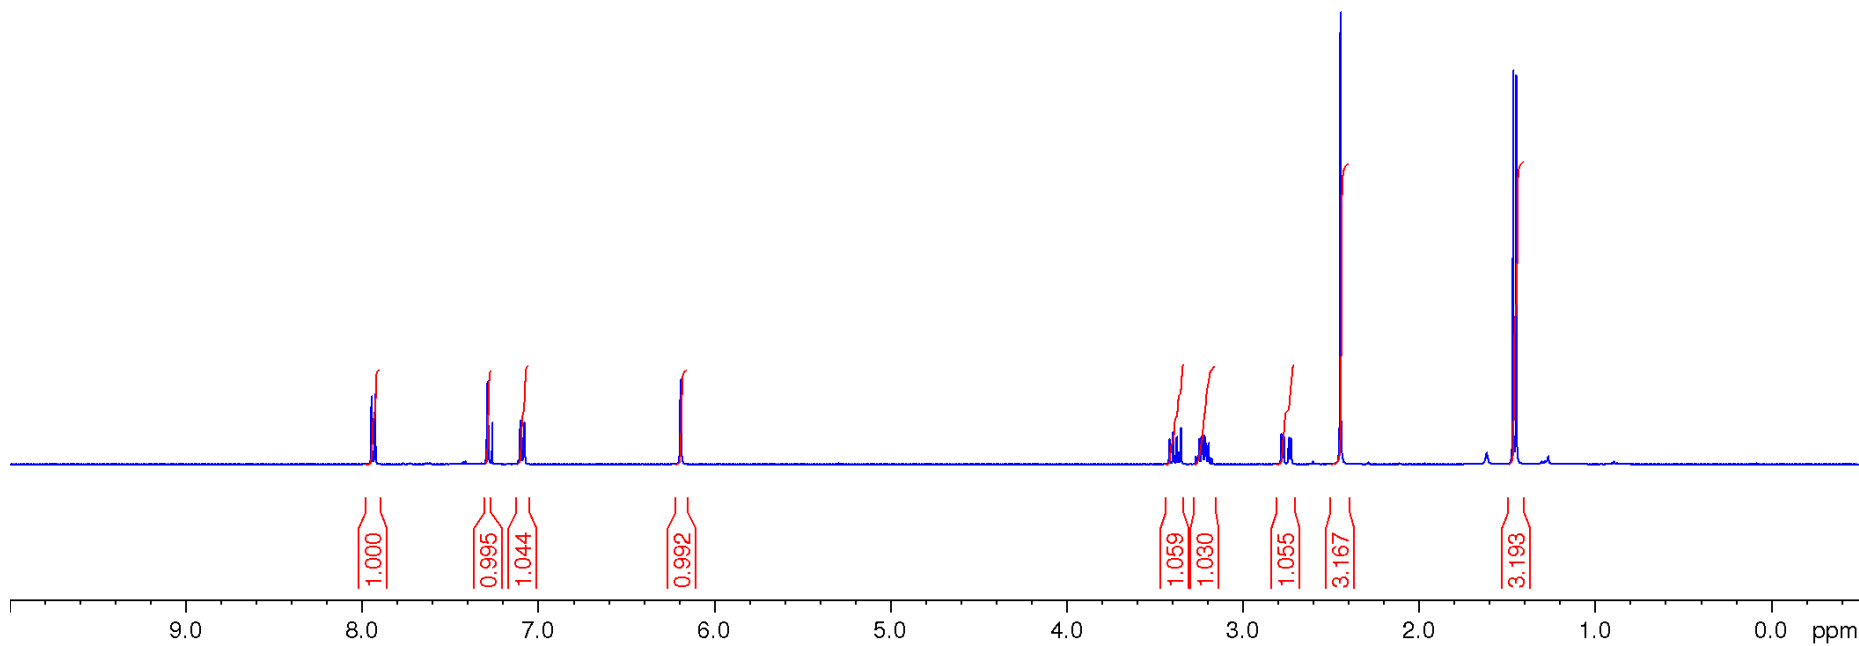

$^{13}\text{C}$  NMR-spectrum (100 MHz,  $\text{CDCl}_3$ )

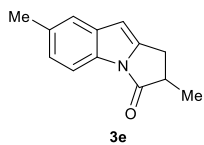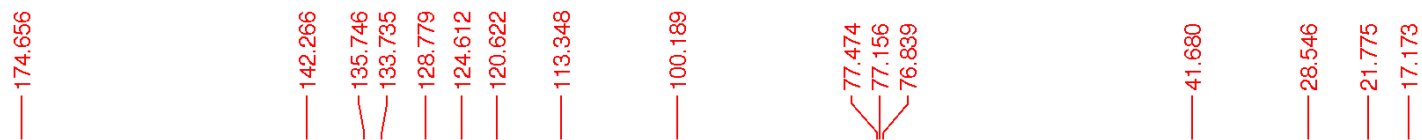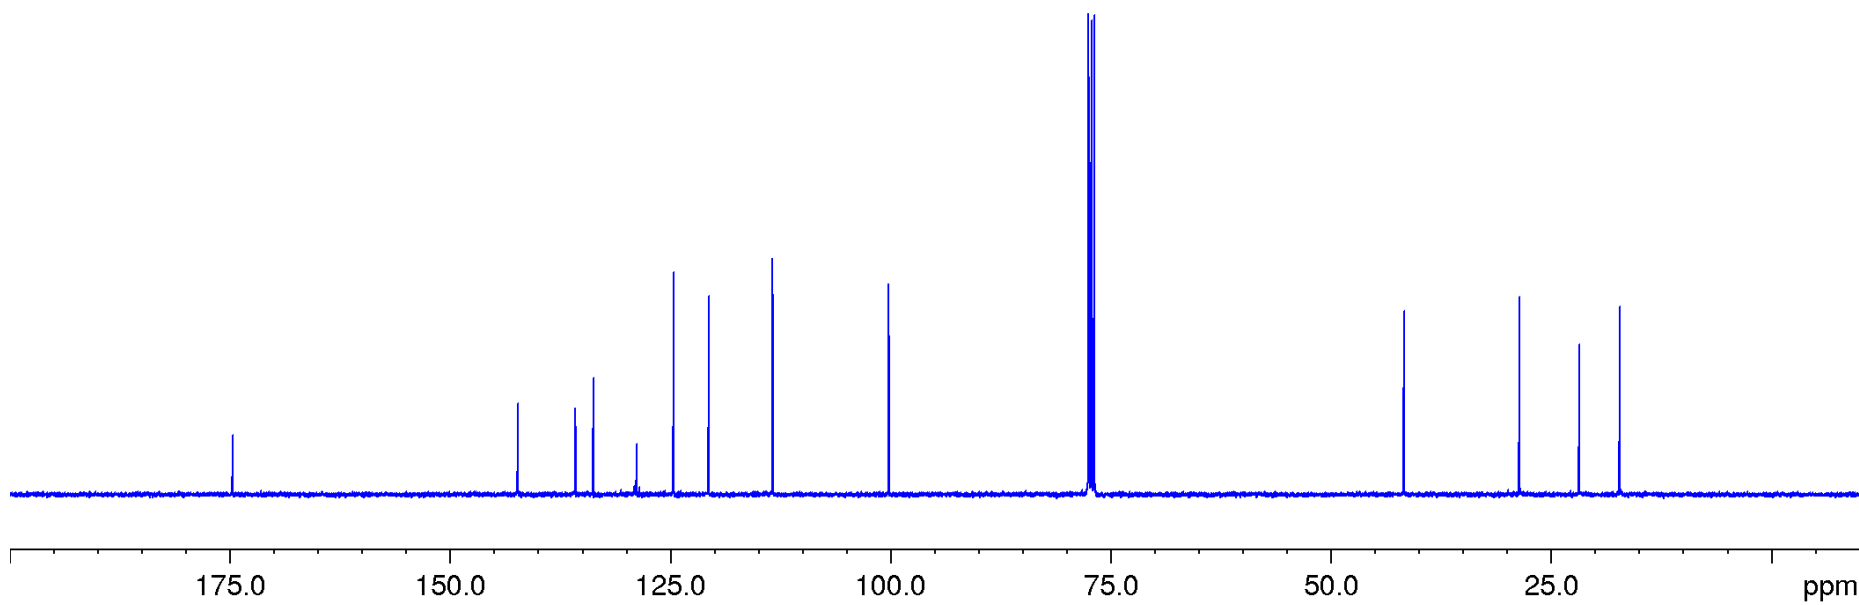



# DEPT 135 NMR-spectrum (CDCl<sub>3</sub>)

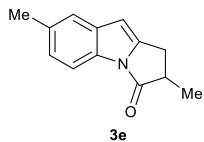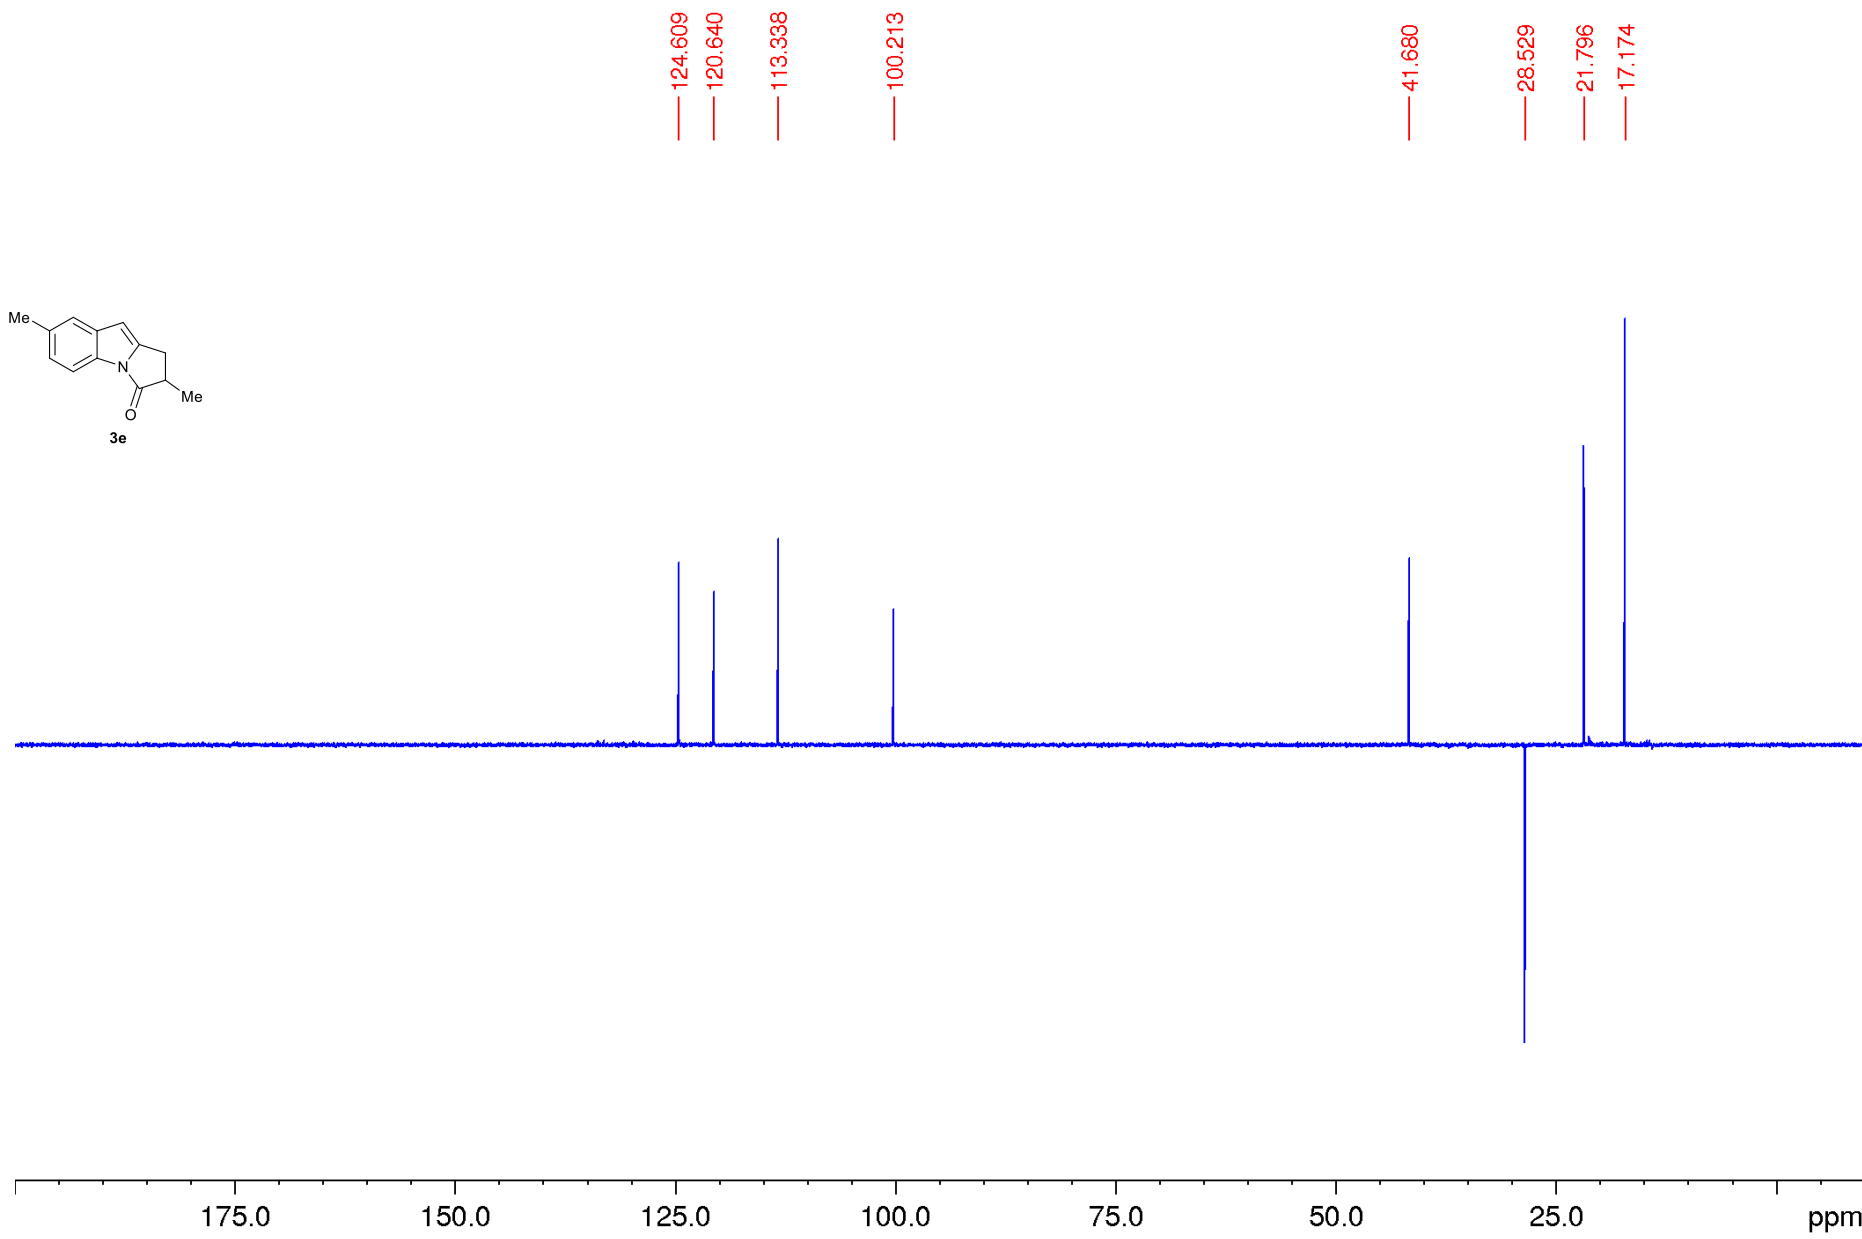

# <sup>1</sup>H NMR-spectrum (400 MHz, DMSO-*d*<sub>6</sub>)

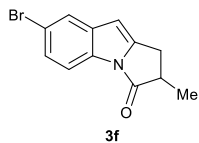

7.862  
7.840  
7.789  
7.785  
7.414  
7.410  
7.393  
7.388  
6.390

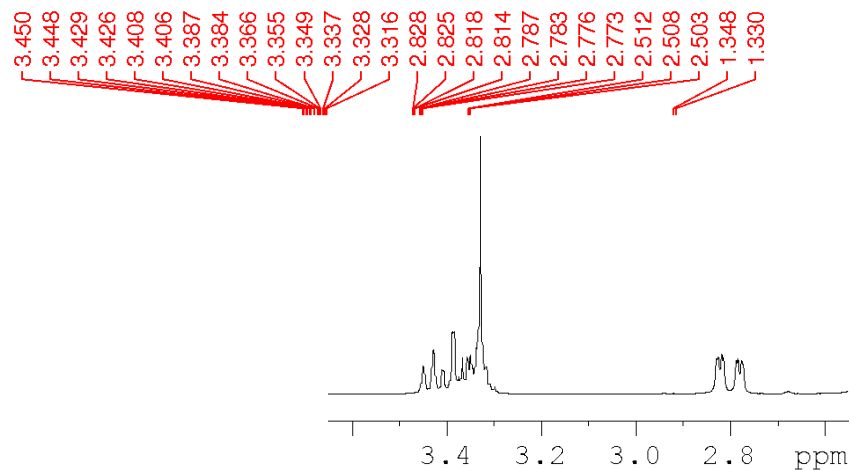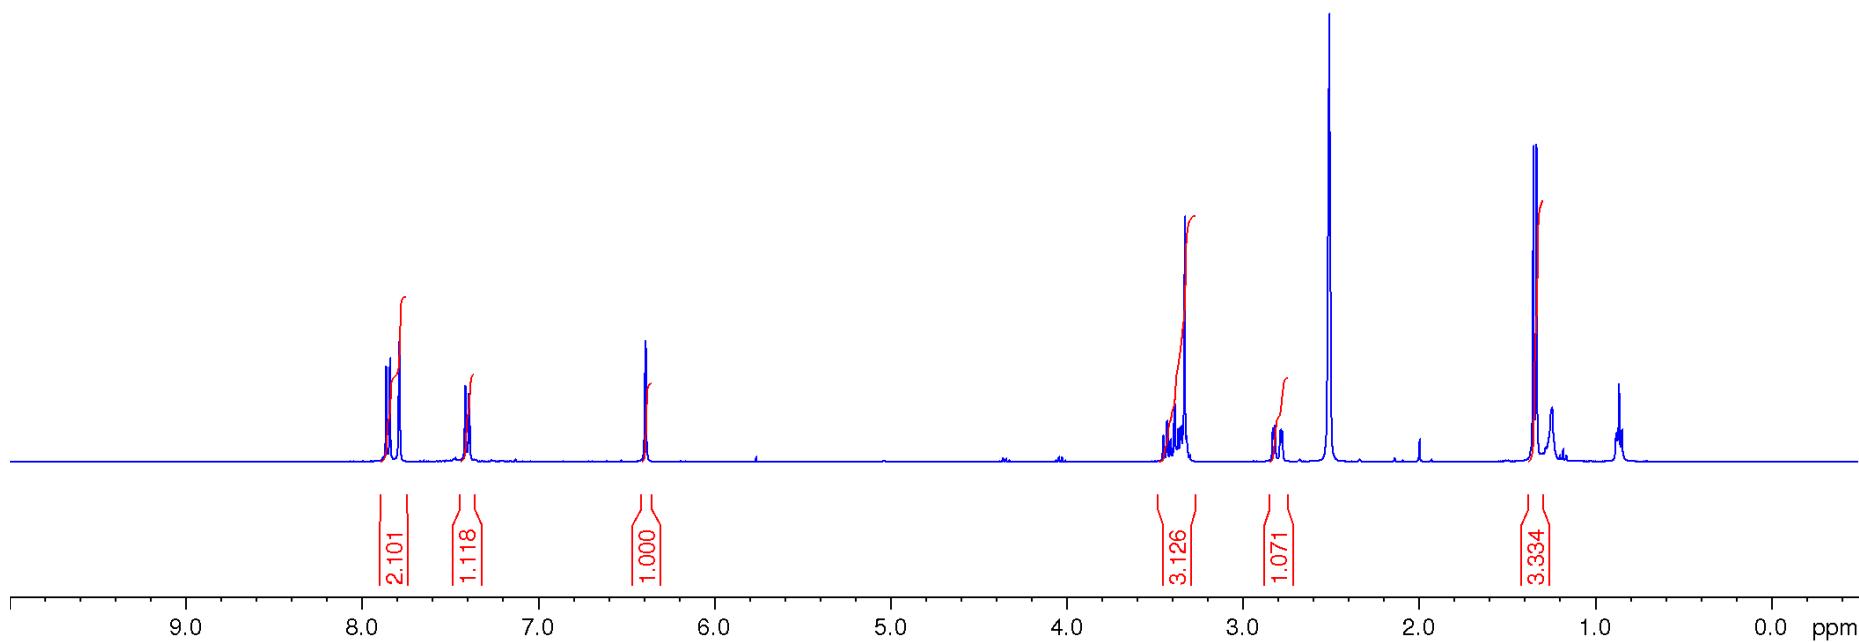

<sup>13</sup>C NMR-spectrum (100 MHz, DMSO-*d*<sub>6</sub>)

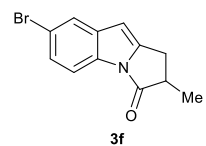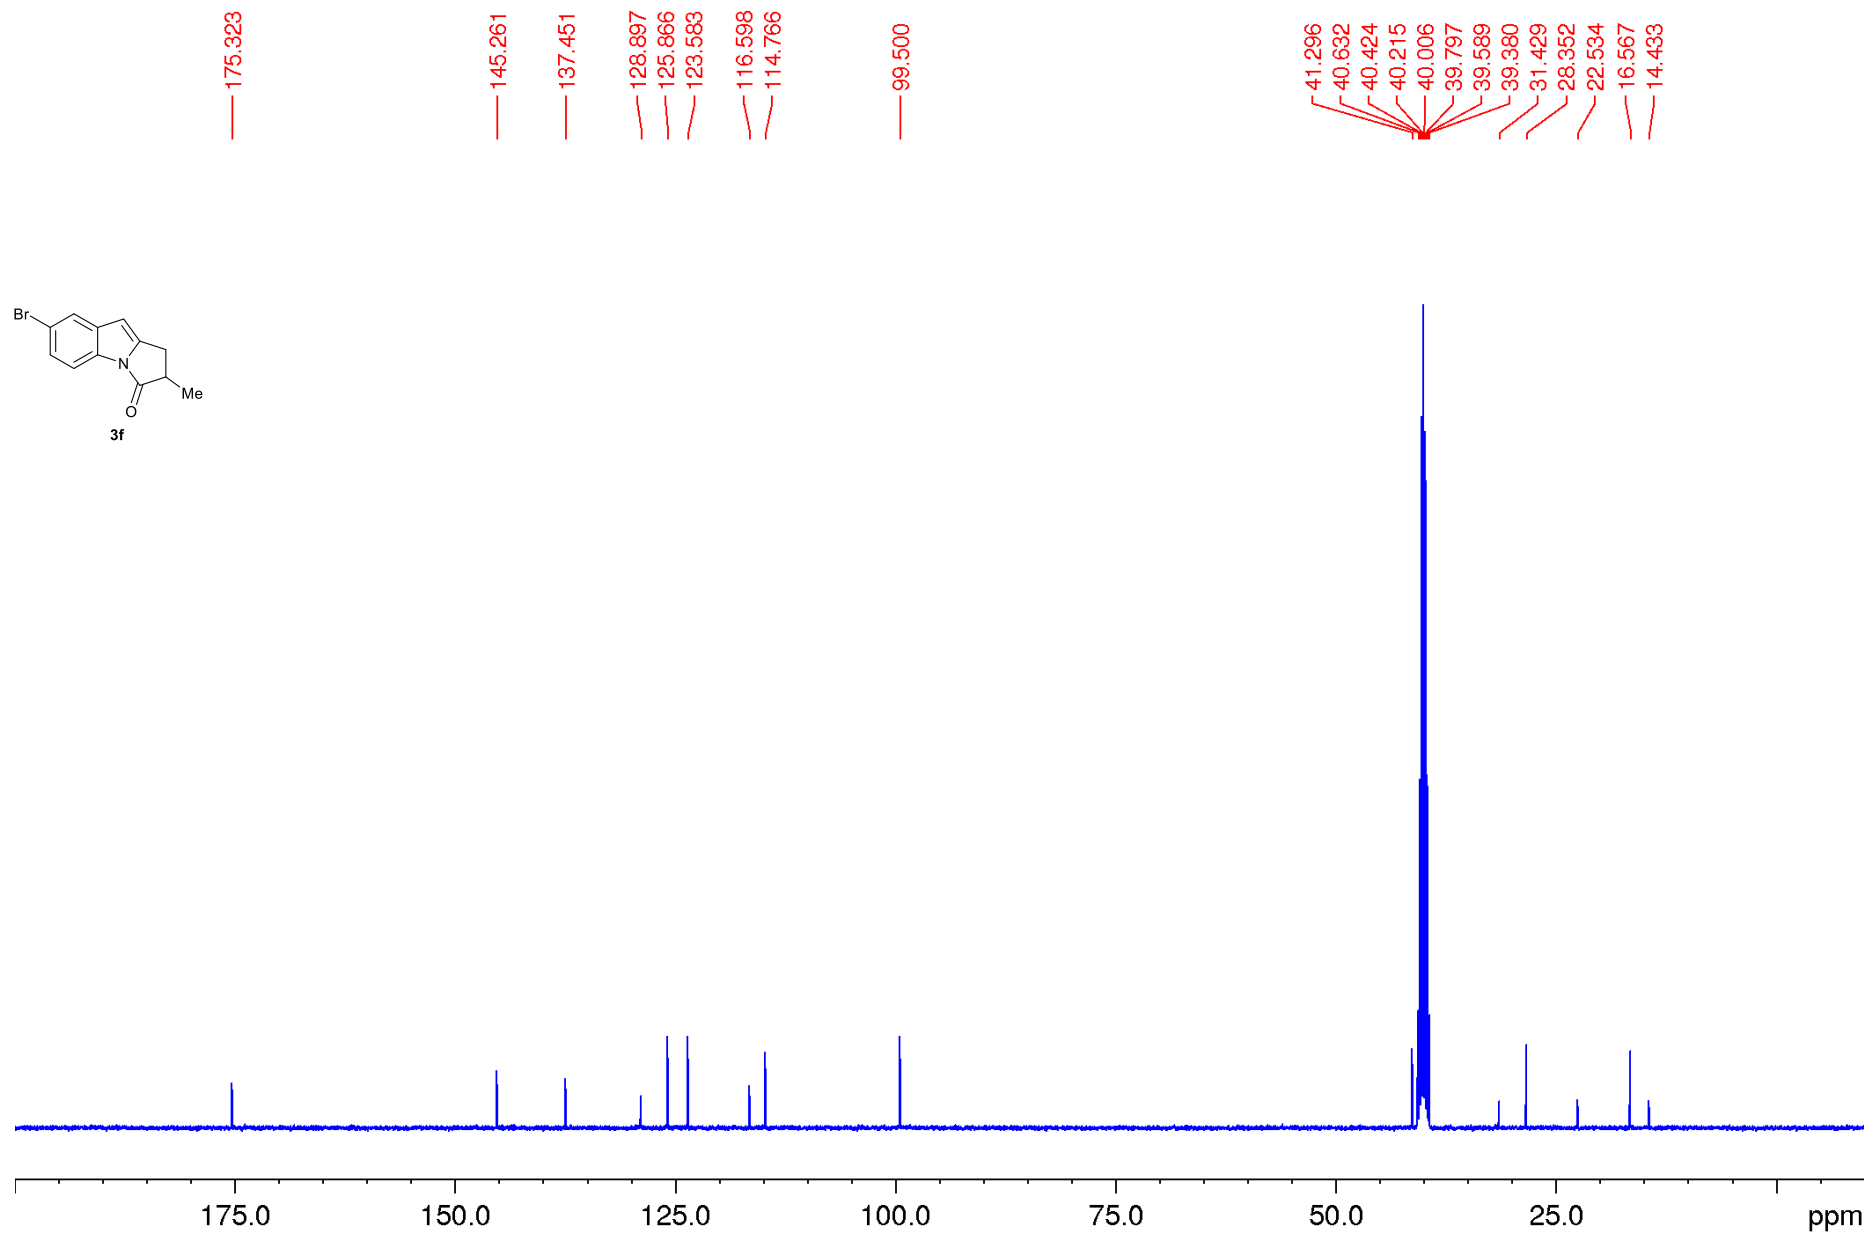

# DEPT 135 NMR-spectrum (DMSO- $d_6$ )

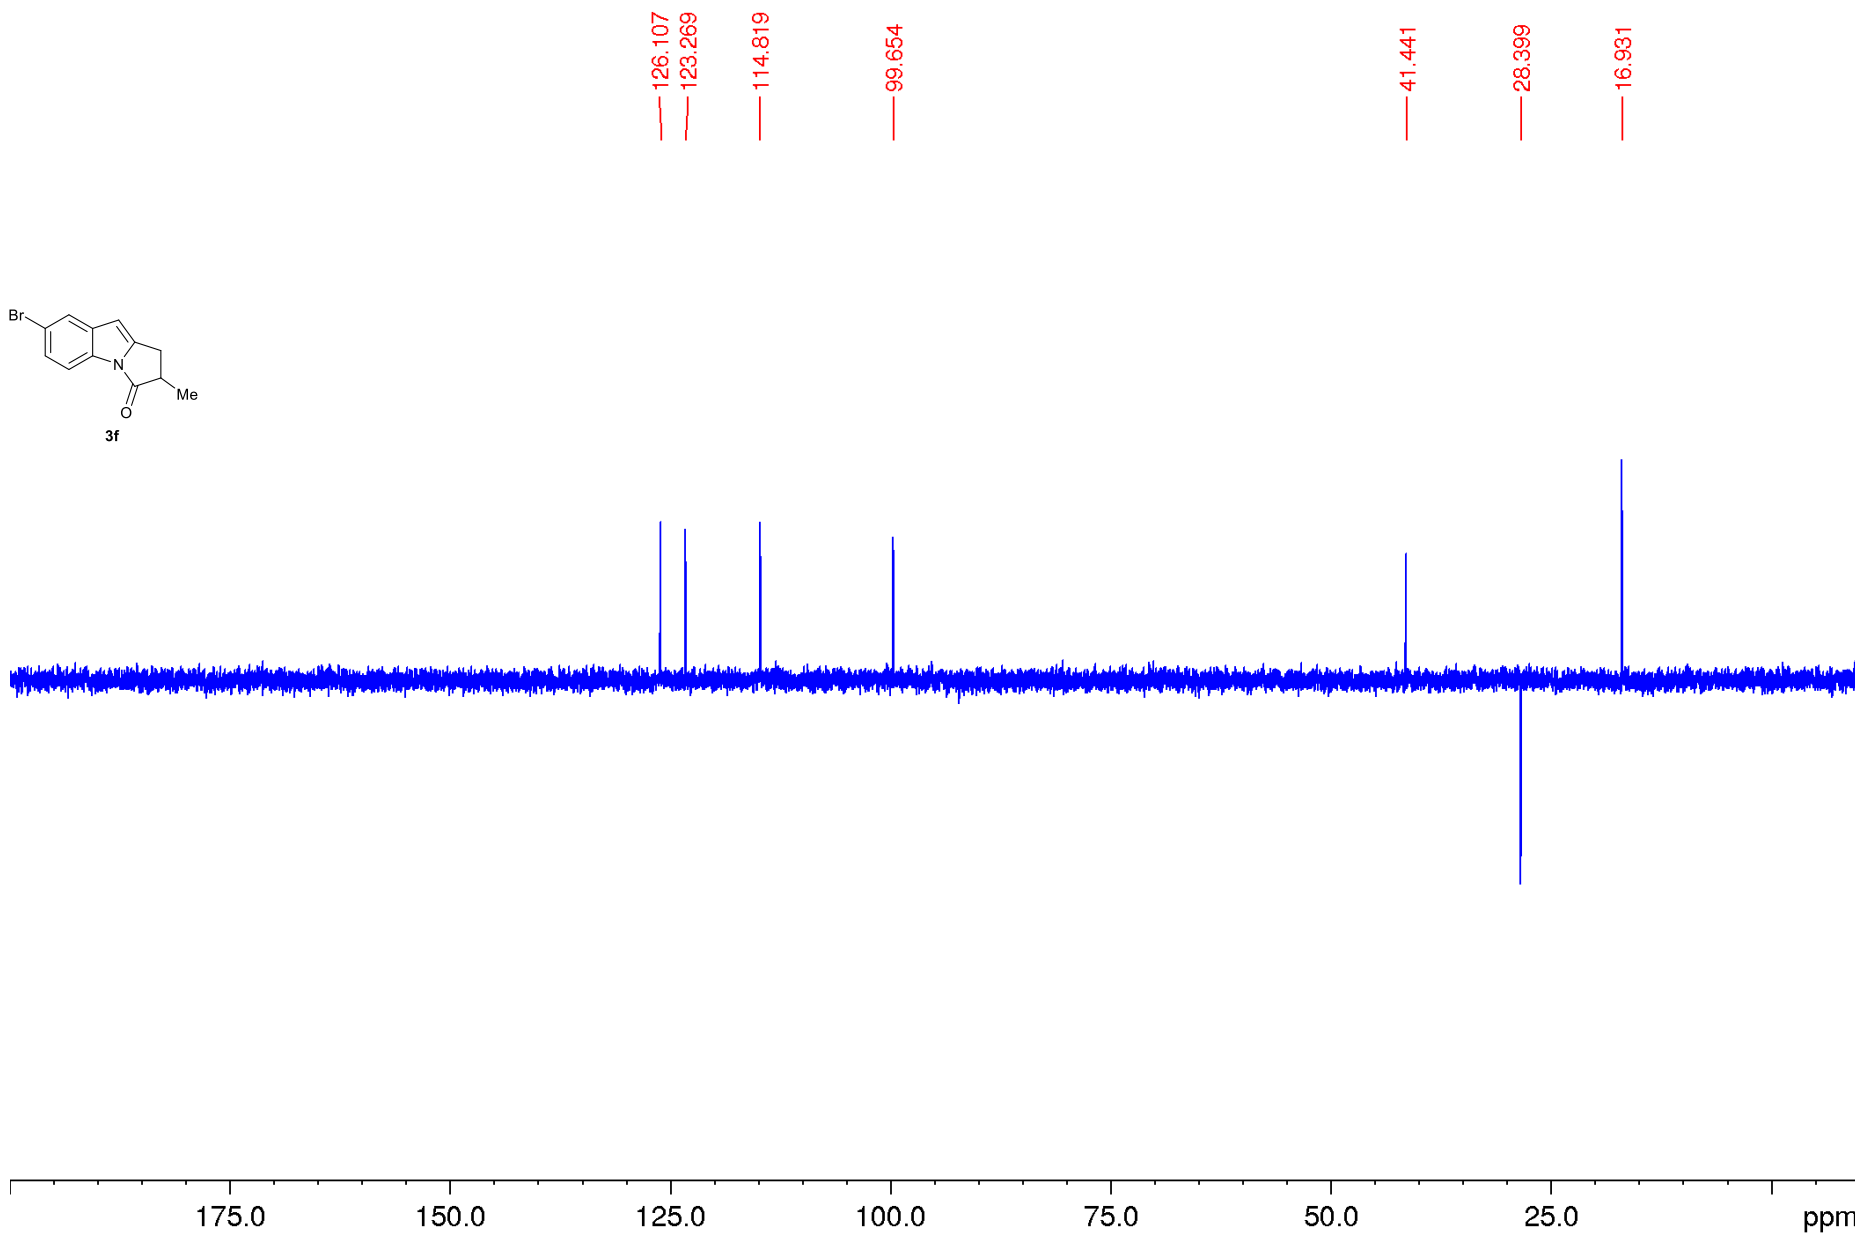

# <sup>1</sup>H NMR-spectrum (400 MHz, CDCl<sub>3</sub>)

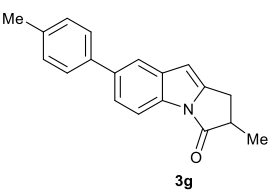

8.108  
8.087  
7.691  
7.688  
7.548  
7.528  
7.515  
7.510  
7.494  
7.489  
7.271  
7.260  
7.252  
6.310

3.460  
3.457  
3.438  
3.435  
3.417  
3.414  
3.396  
3.392  
3.304  
3.292  
3.286  
3.274  
3.267  
3.264  
3.255  
3.252  
3.245  
3.233  
3.227  
3.215  
2.824  
2.820  
2.812  
2.808  
2.781  
2.777  
2.769  
2.765  
2.408  
1.489  
1.470

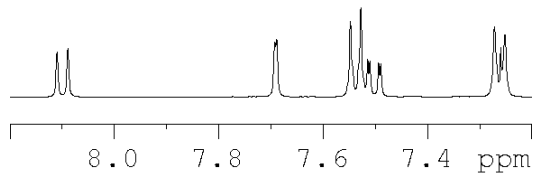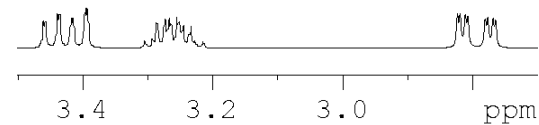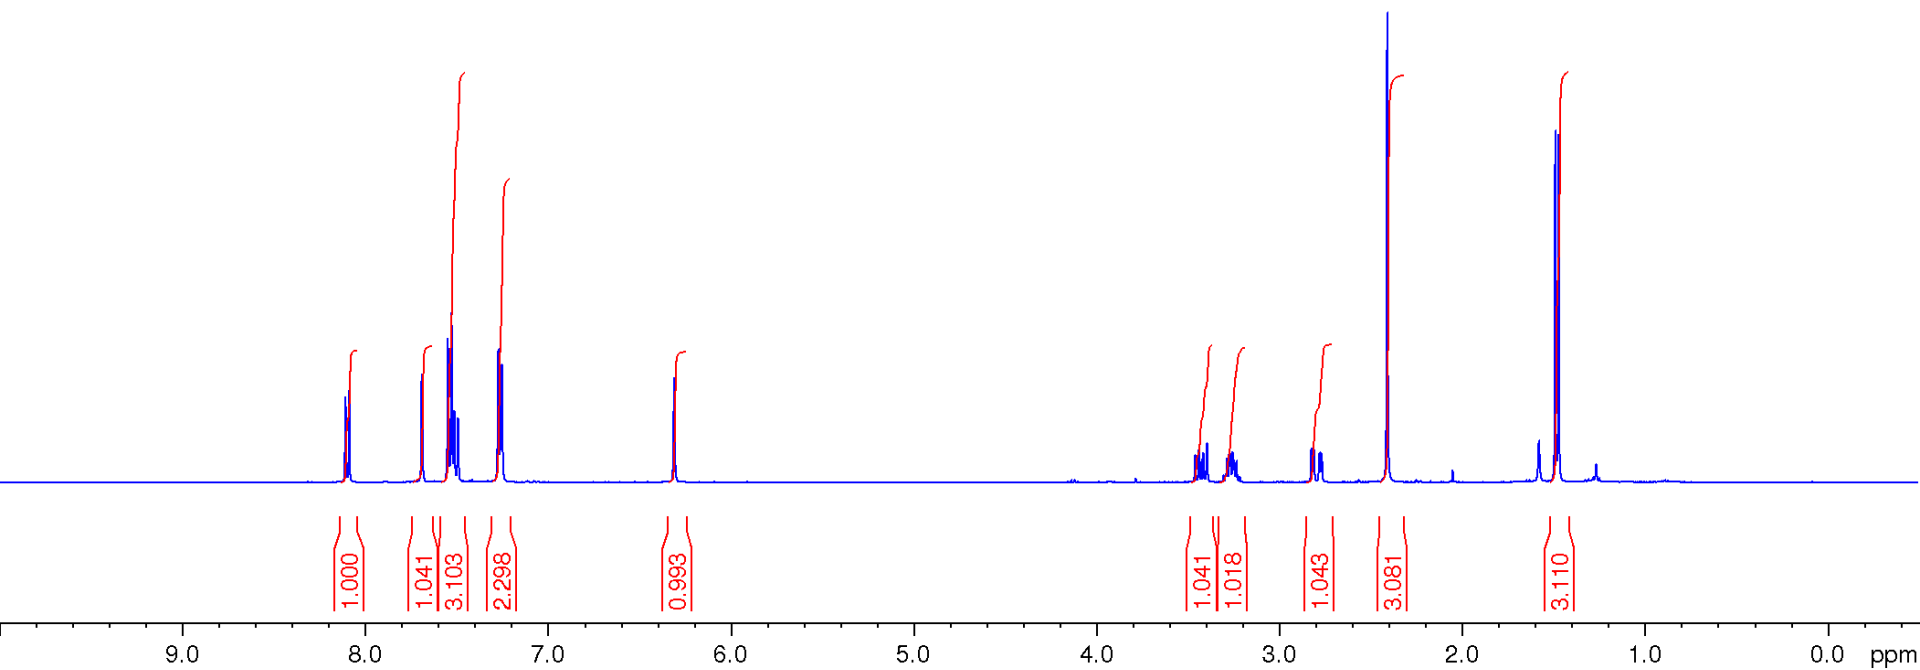

$^{13}\text{C}$  NMR-spectrum (100 MHz,  $\text{CDCl}_3$ )

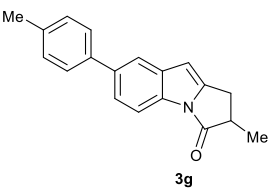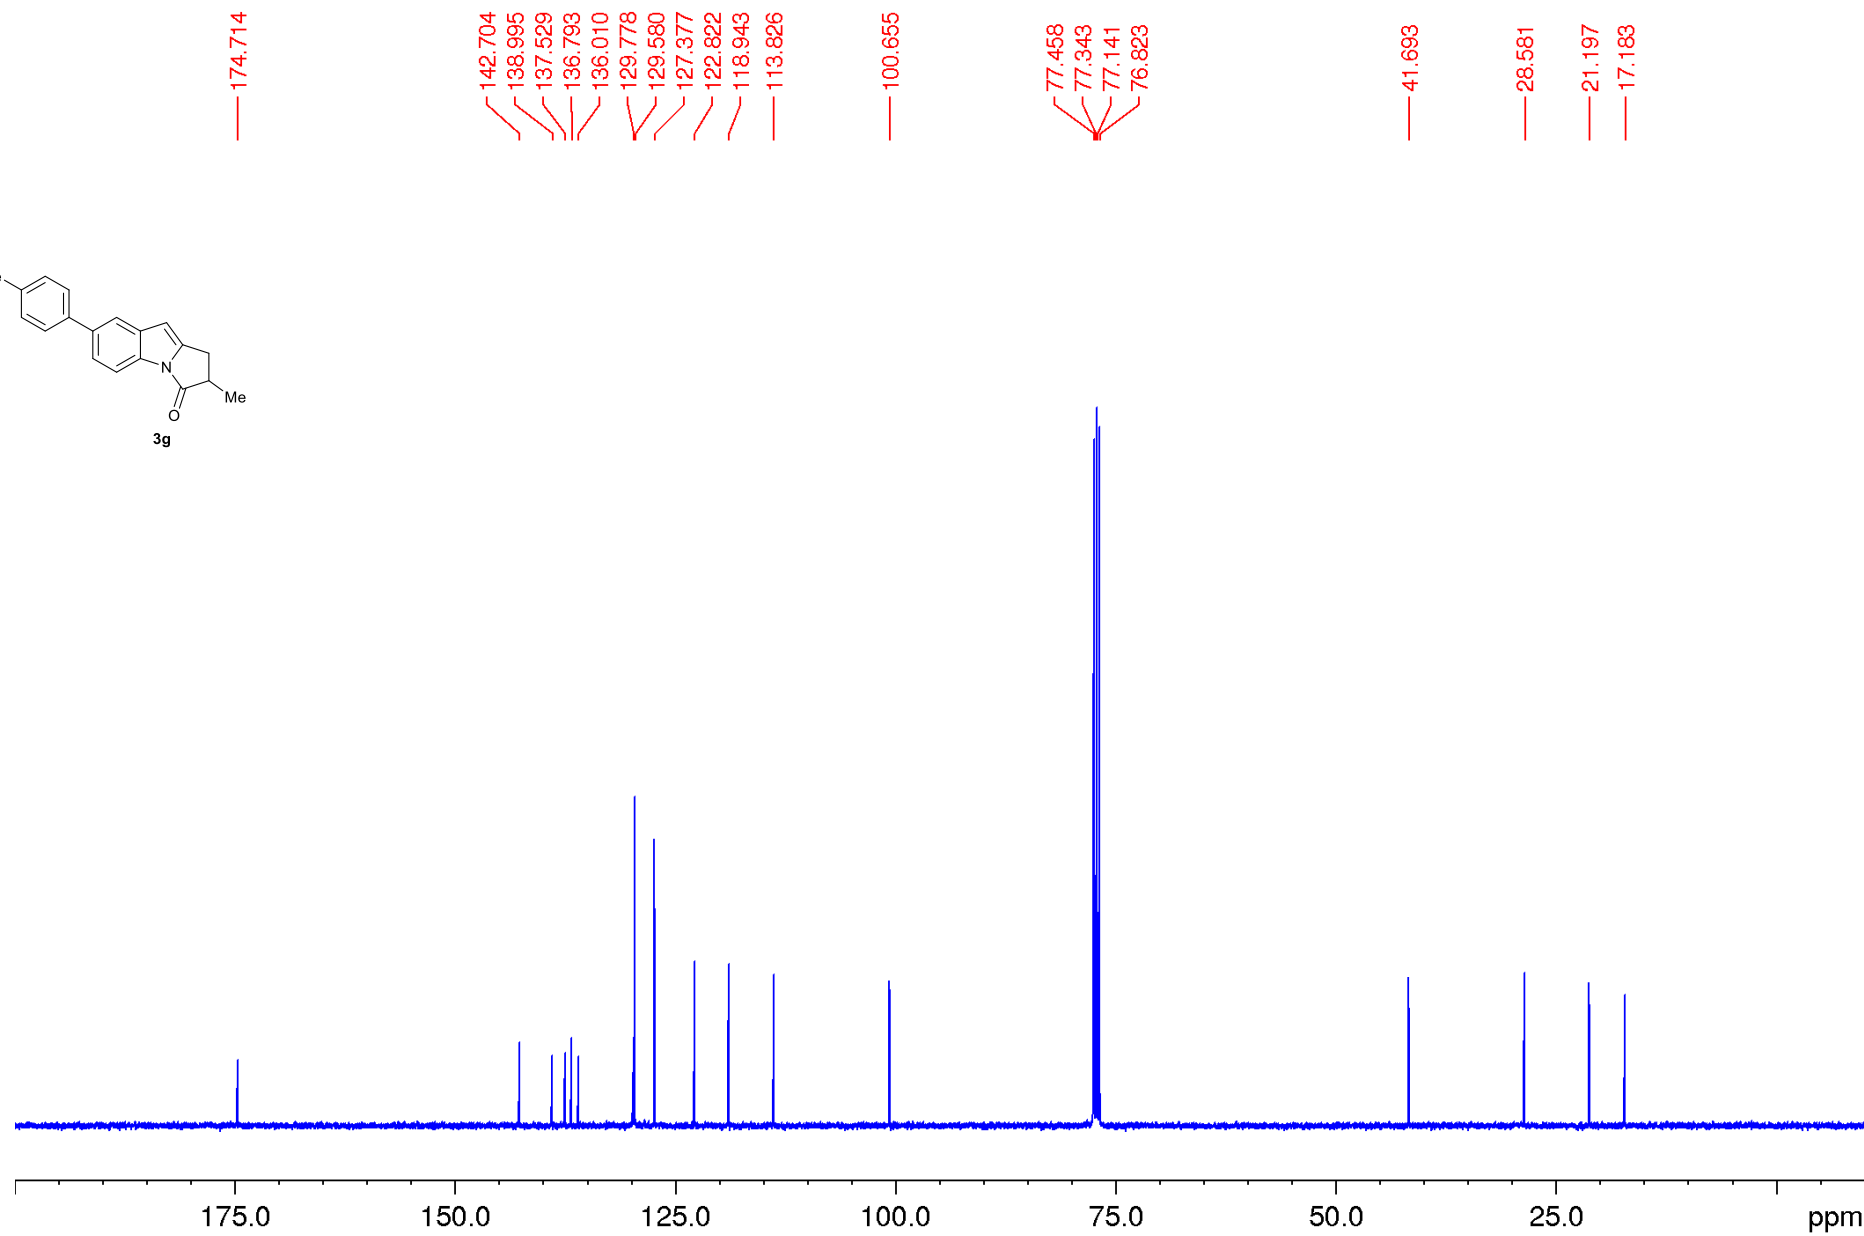

# DEPT 135 NMR-spectrum (CDCl<sub>3</sub>)

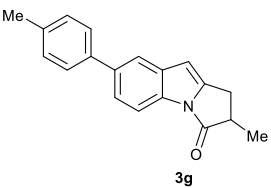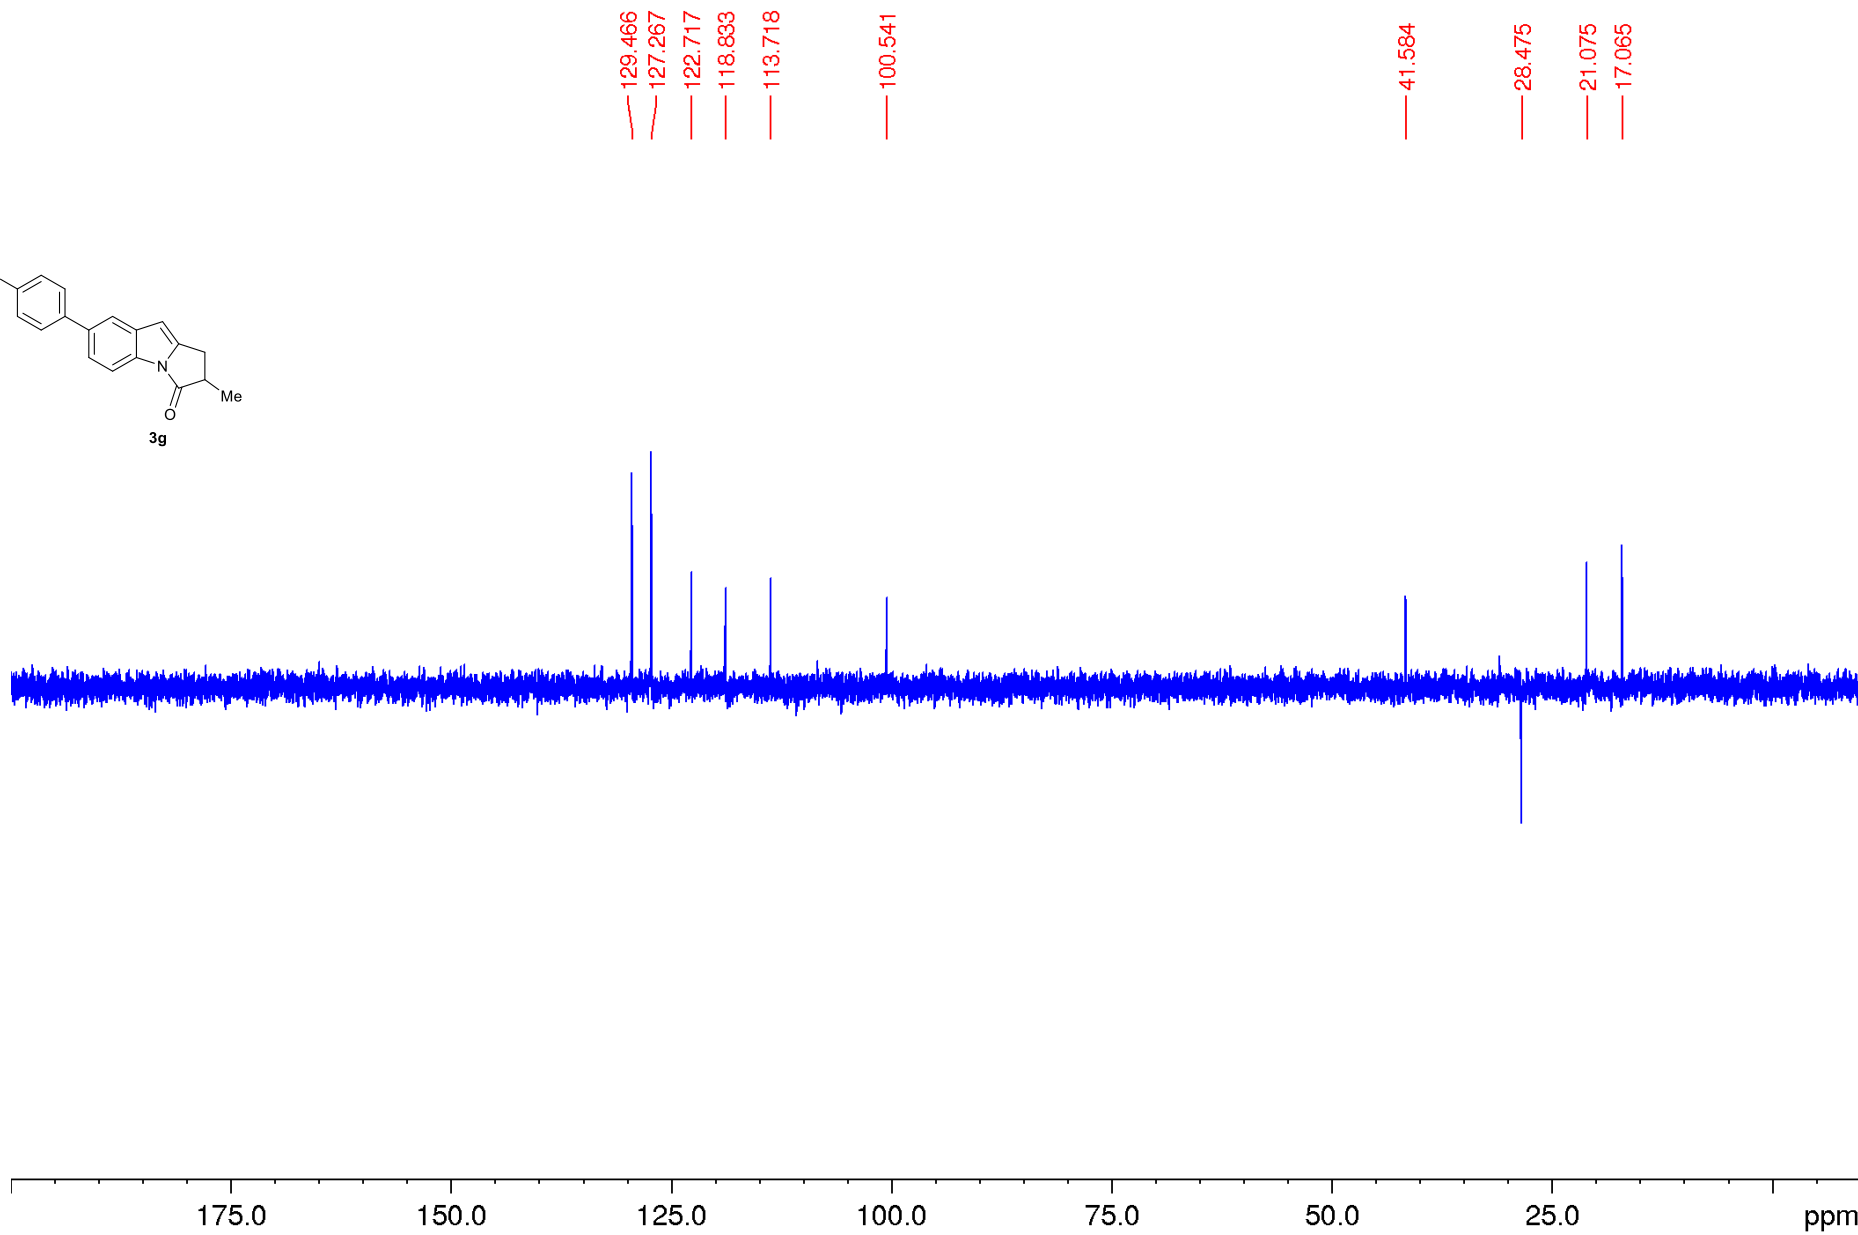

# <sup>1</sup>H NMR-spectrum (400 MHz, CDCl<sub>3</sub>)

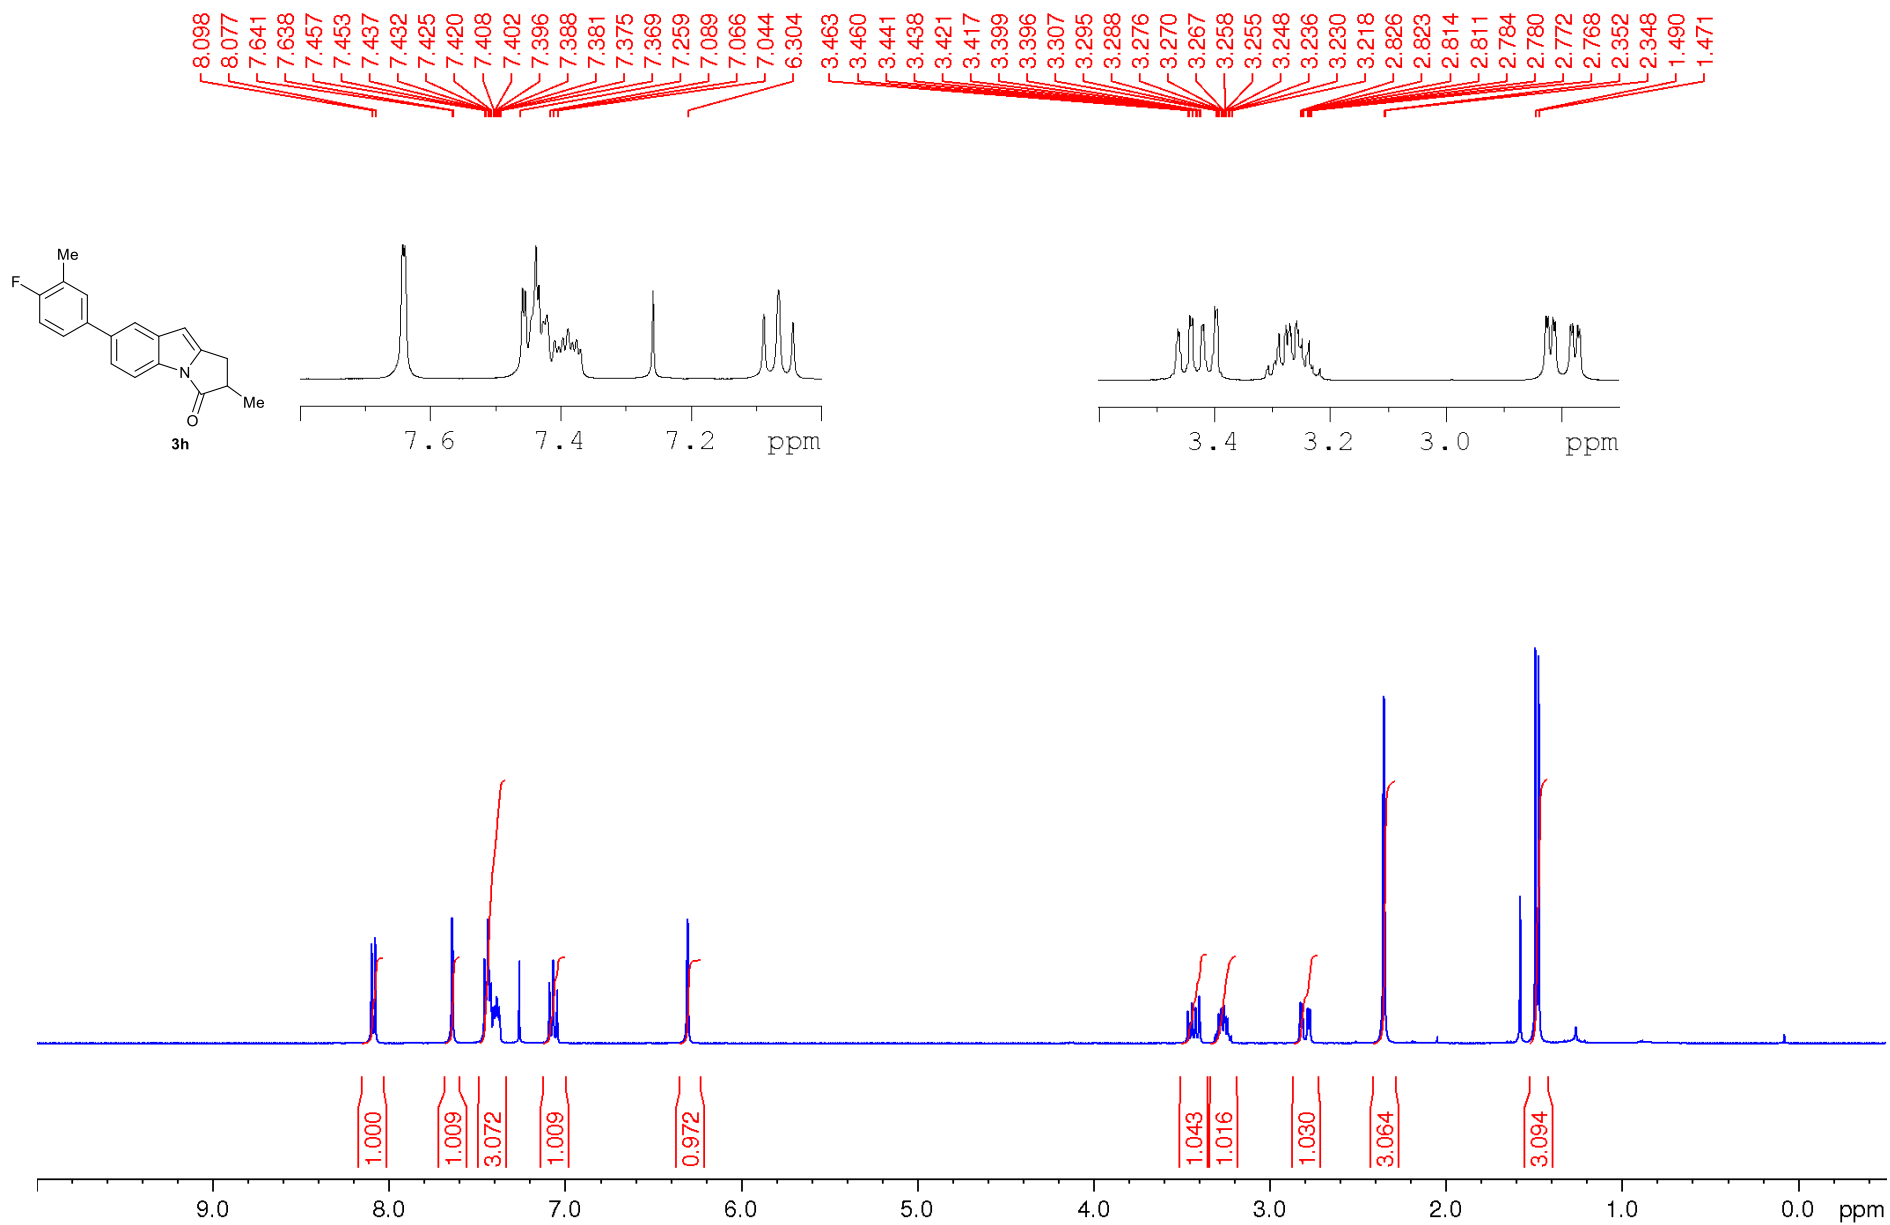



$^{13}\text{C}$  NMR-spectrum (100 MHz,  $\text{CDCl}_3$ )

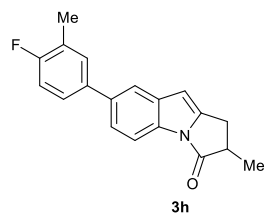

174.746  
162.236  
159.805  
142.859  
137.741  
137.706  
136.827  
136.016  
130.633  
130.583  
129.825  
126.350  
126.272  
125.174  
125.002  
122.810  
119.028  
115.430  
115.207  
113.863  
100.607  
77.472  
77.154  
76.837  
41.703  
28.601  
17.183  
14.865  
14.832

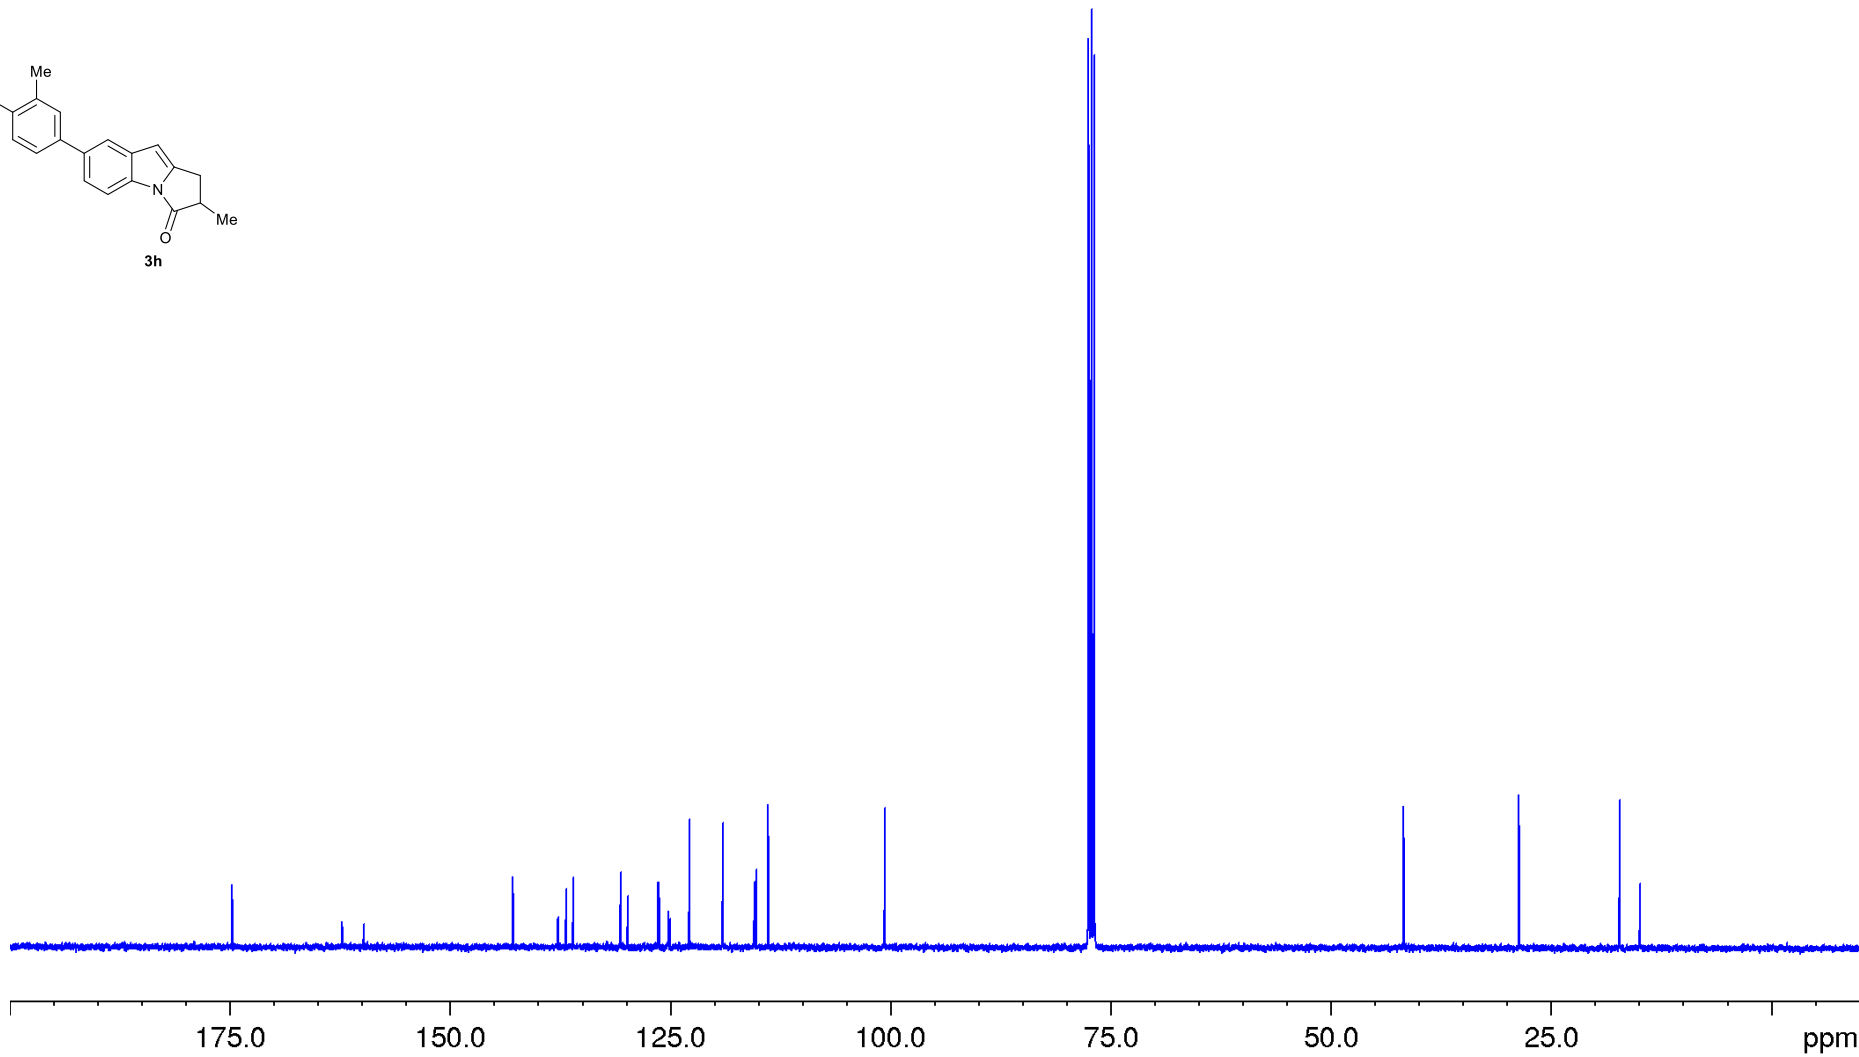

# DEPT 135 NMR-spectrum (CDCl<sub>3</sub>)

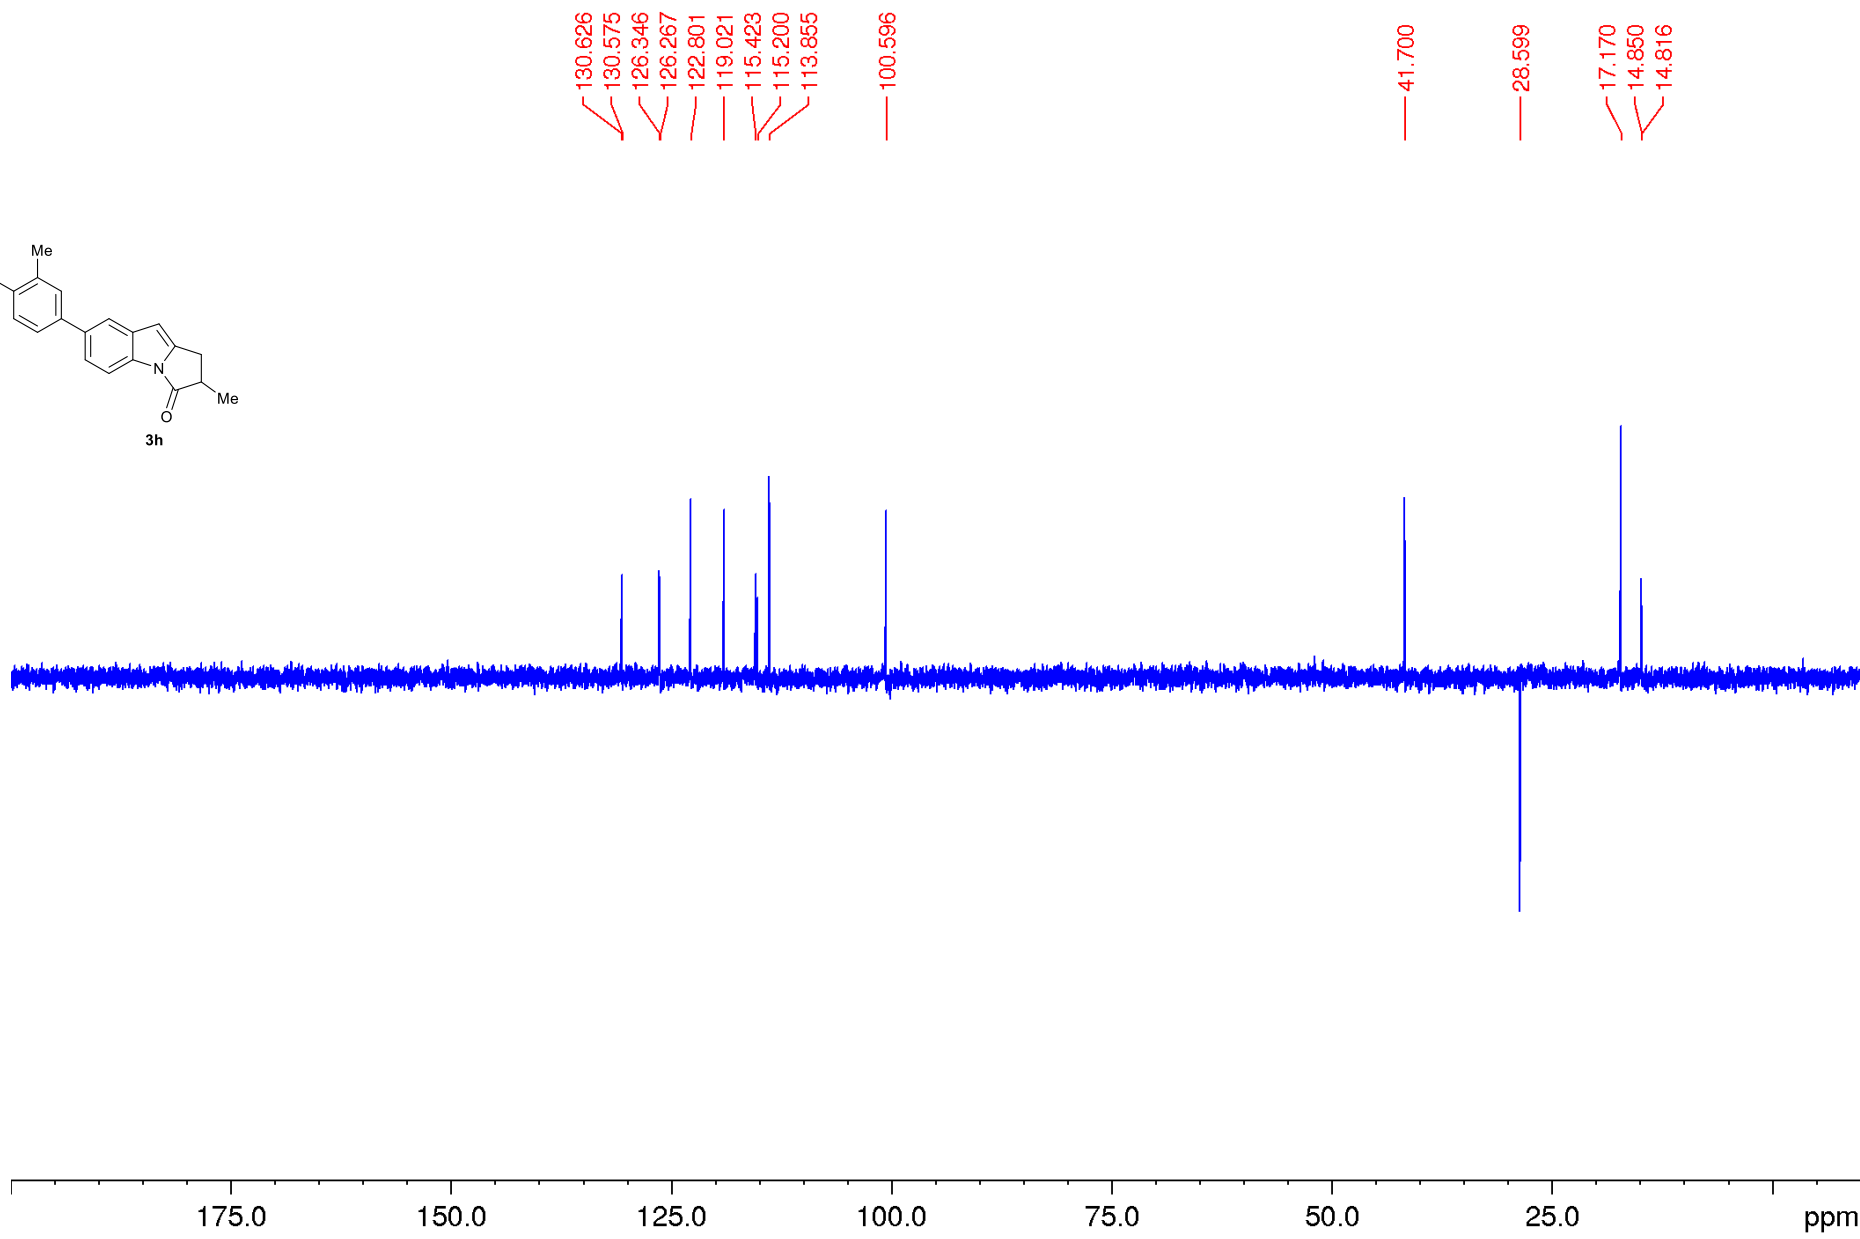

$^{19}\text{F}$  NMR-spectrum (376.5 MHz,  $\text{CDCl}_3$ )



-120.624  
-120.631  
-120.639  
-120.649  
-120.656  
-120.663  
-120.681

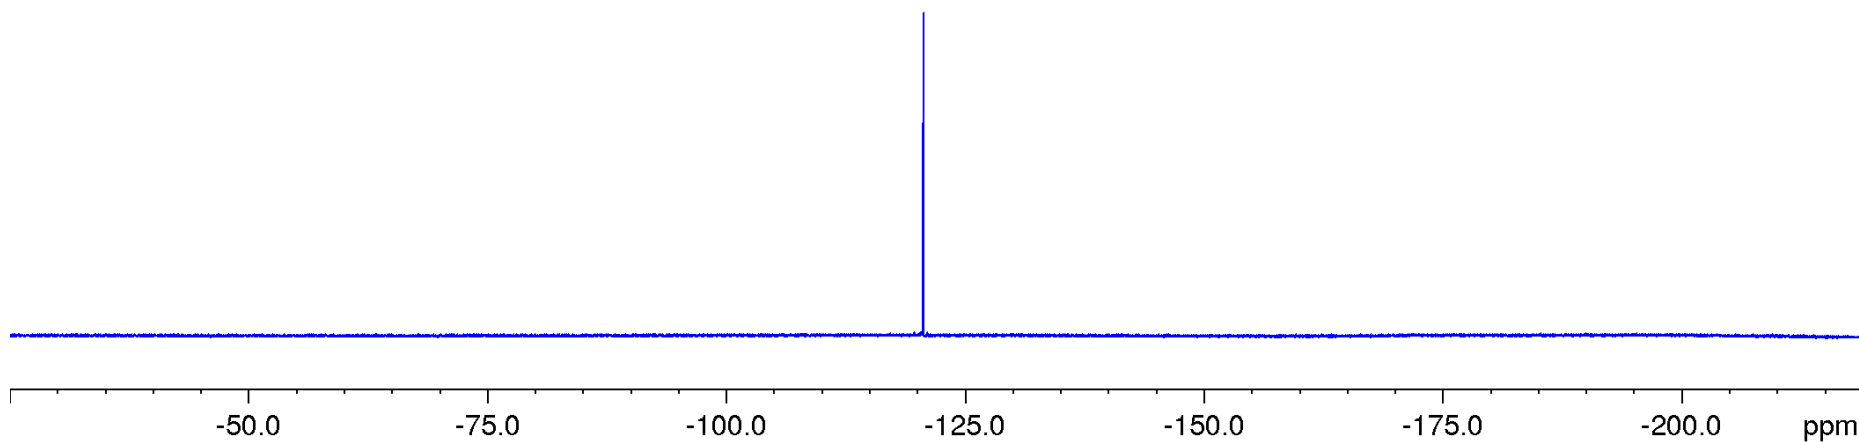

# $^1\text{H}$ NMR-spectrum (400 MHz, $\text{CDCl}_3$ )

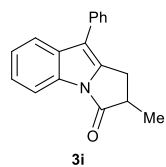

8.155  
8.145  
8.133  
7.795  
7.782  
7.773  
7.617  
7.598  
7.507  
7.488  
7.469  
7.362  
7.350  
7.344  
7.333  
7.327  
7.259

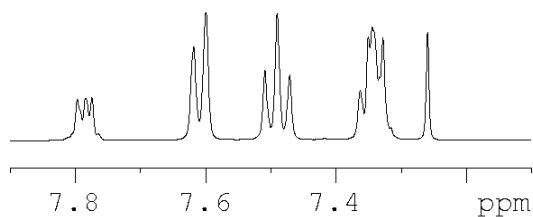

3.601  
3.579  
3.558  
3.536  
3.544  
3.325  
3.313  
3.306  
3.293  
3.286  
3.273  
3.254  
2.973  
2.960  
2.929  
2.917  
1.509  
1.491

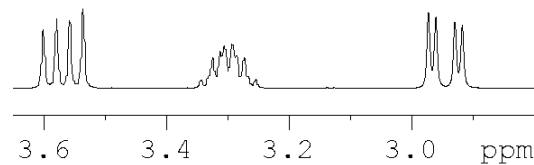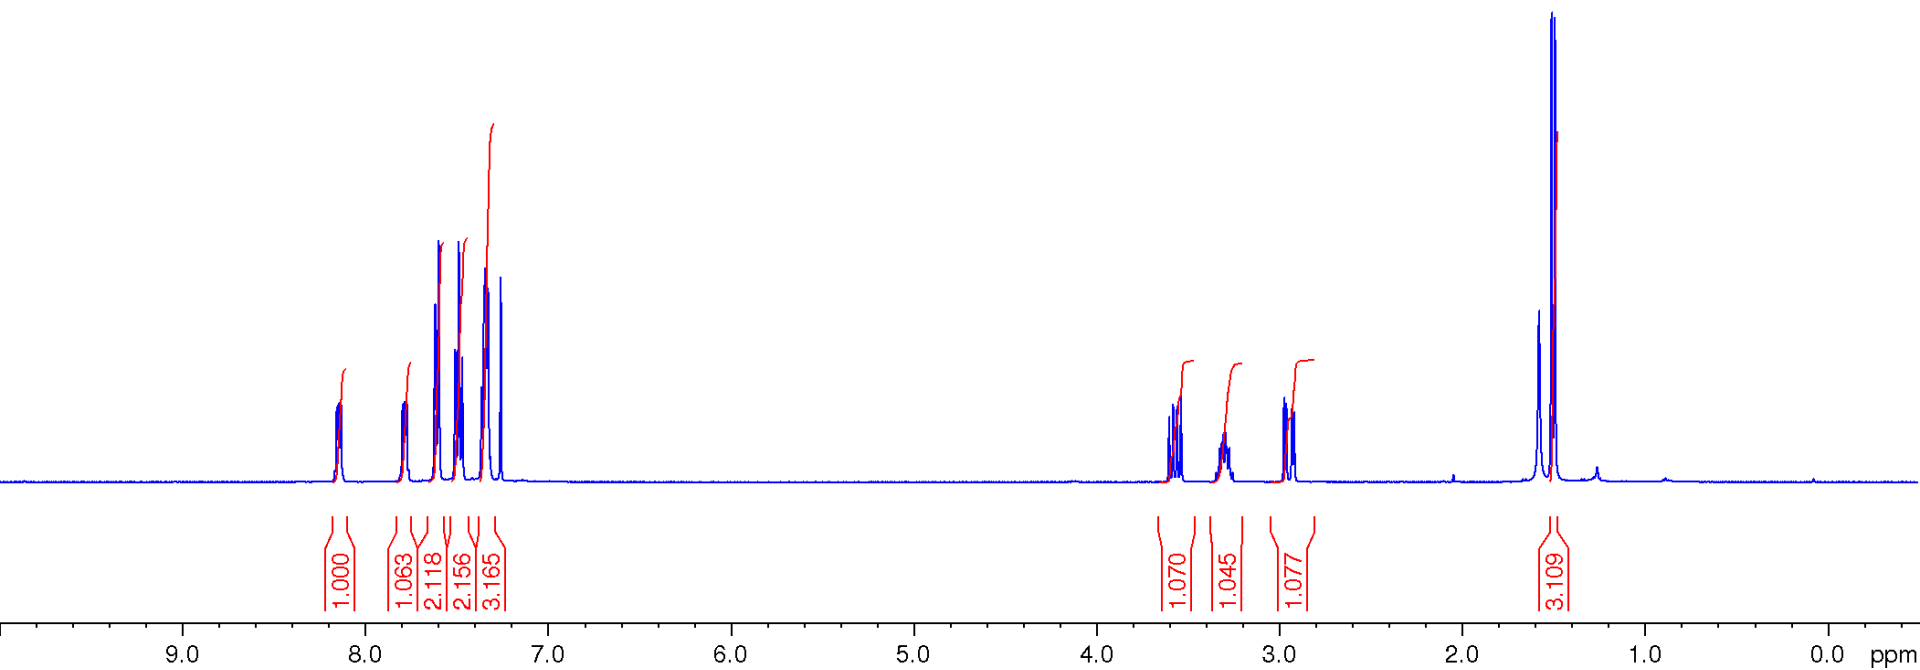

$^{13}\text{C}$  NMR-spectrum (100 MHz,  $\text{CDCl}_3$ )



174.578  
138.288  
133.746  
133.567  
130.777  
128.929  
128.411  
127.841  
126.764  
124.307  
123.741  
119.716  
114.684  
113.937  
77.355  
77.037  
76.720  
41.431  
28.739  
17.086

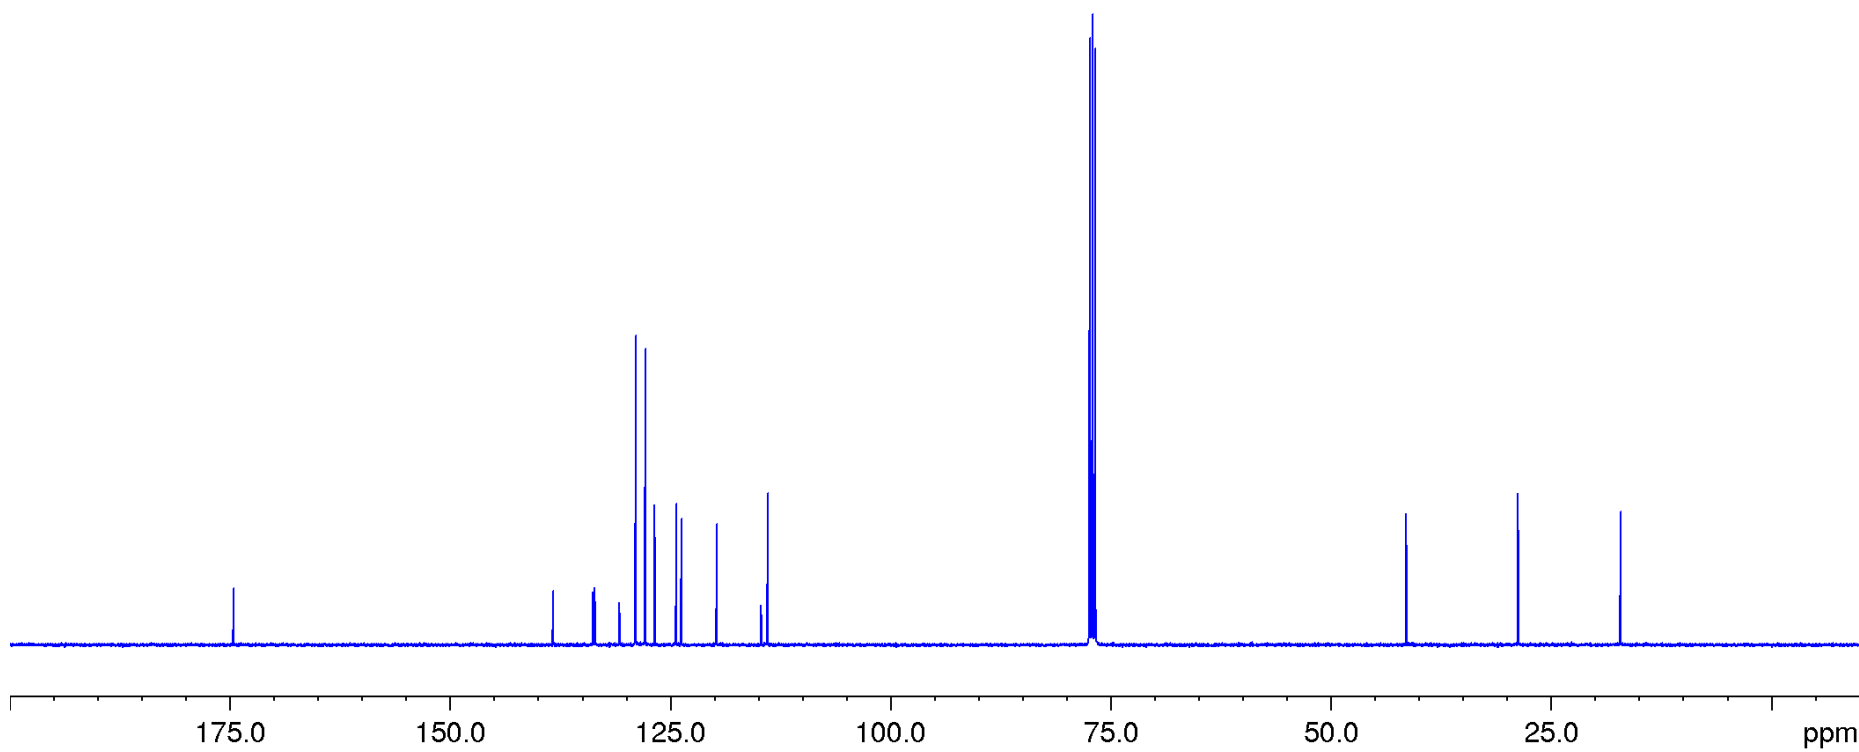

# DEPT 135 NMR-spectrum (CDCl<sub>3</sub>)

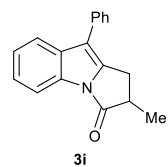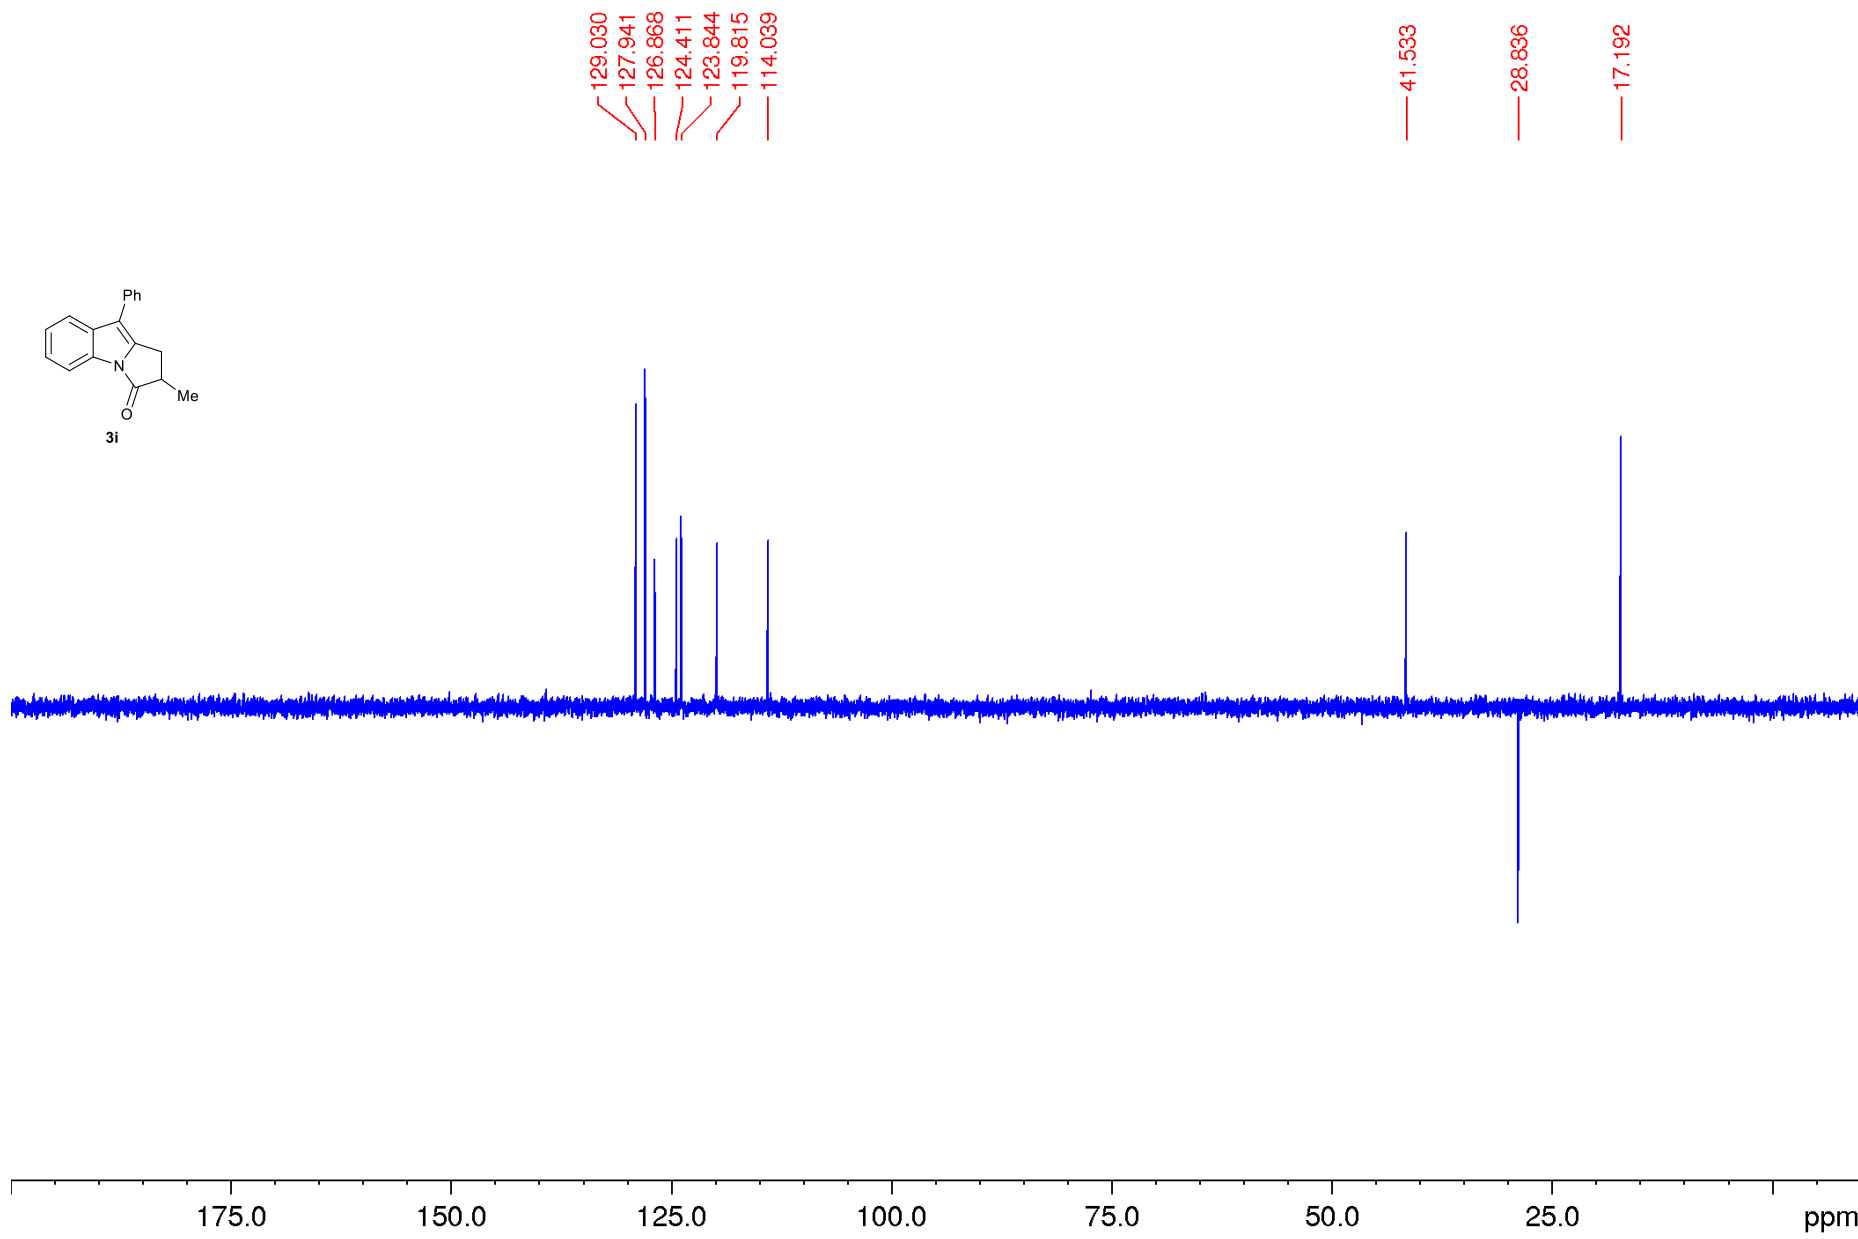

# $^1\text{H}$ NMR-spectrum (400 MHz, $\text{CDCl}_3$ )

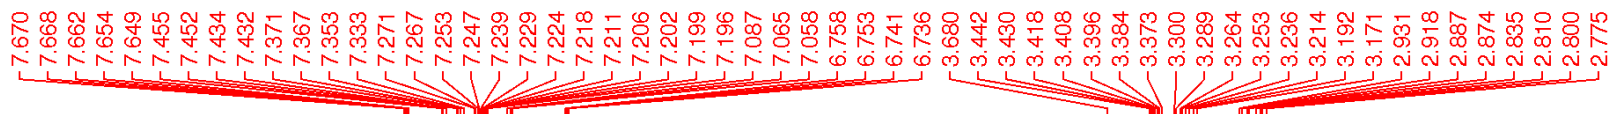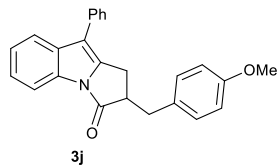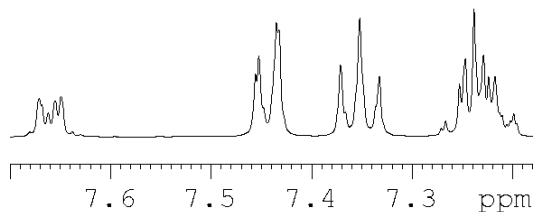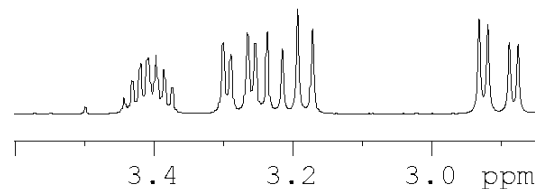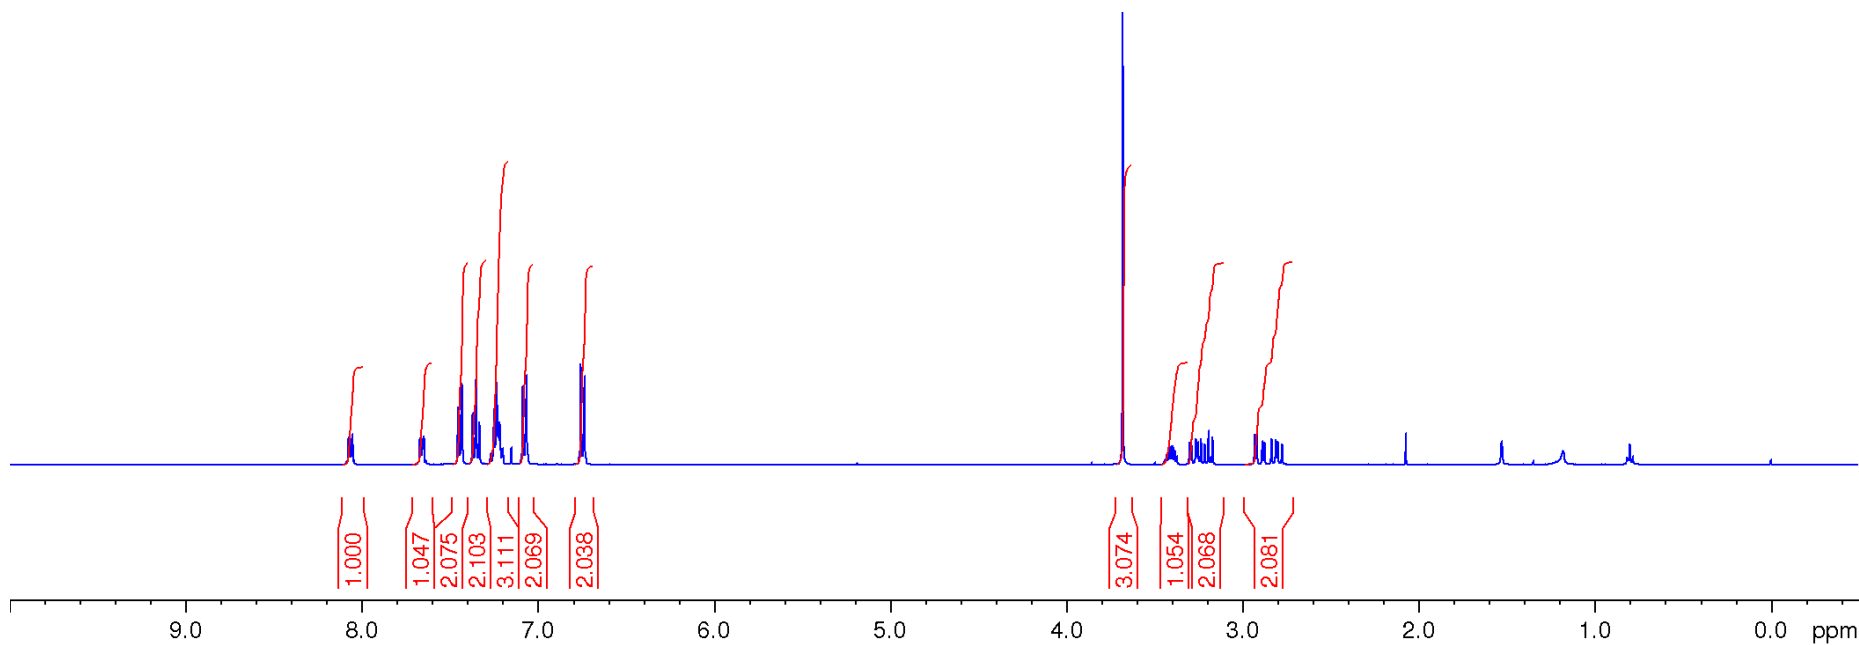

# $^{13}\text{C}$ NMR-spectrum (100 MHz, $\text{CDCl}_3$ )

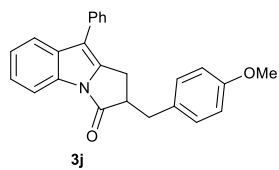

173.225

158.607

138.381

133.846

133.546

130.854

130.164

130.024

128.986

127.934

126.861

124.475

123.868

119.817

114.918

114.289

114.078

77.469

77.151

76.834

55.354

48.355

36.373

25.817

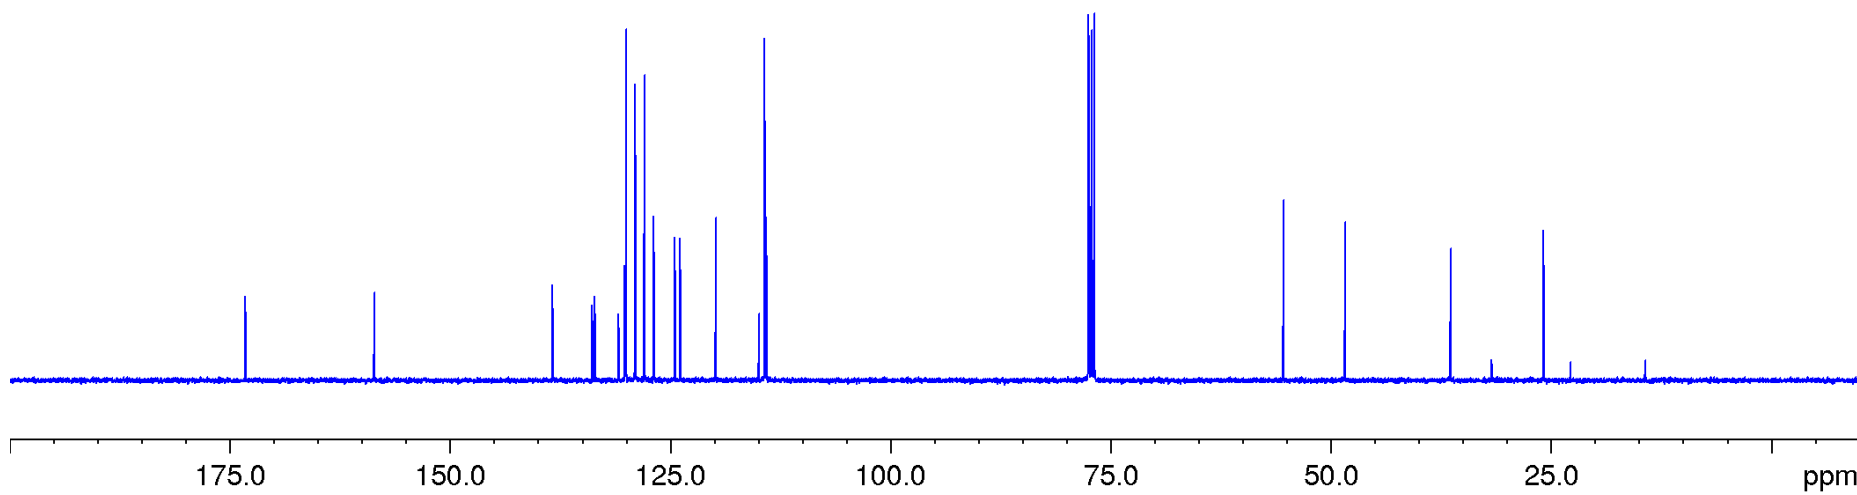



# DEPT 135 NMR-spectrum (CDCl<sub>3</sub>)

129.933  
128.891  
127.845  
126.770  
124.379  
123.774  
119.719  
114.186  
113.989

55.263

48.271

36.282

25.705

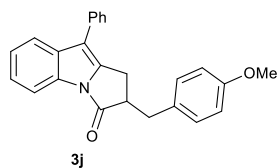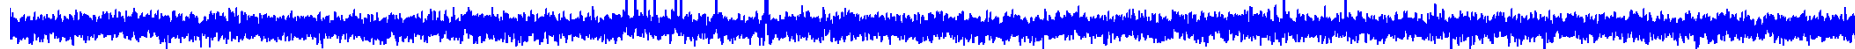

175.0

150.0

125.0

100.0

75.0

50.0

25.0

ppm

# $^1\text{H}$ NMR-spectrum (400 MHz, $\text{CDCl}_3$ )

8.168  
8.162  
8.159  
8.150  
8.146  
7.782  
7.778  
7.769  
7.765  
7.759  
7.588  
7.585  
7.567  
7.565  
7.494  
7.475  
7.456  
7.355  
7.346  
7.336  
7.314  
7.313  
7.310  
7.259  
6.291  
6.286  
6.283  
6.278  
6.133  
6.132  
6.125  
3.619  
3.607  
3.596  
3.585  
3.574  
3.562  
3.551  
3.488  
3.466  
3.445  
3.427  
3.423  
3.418  
3.389  
3.379  
3.144  
3.132  
3.100  
3.088  
3.075  
3.060  
3.037

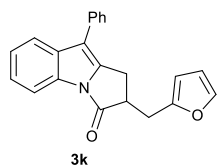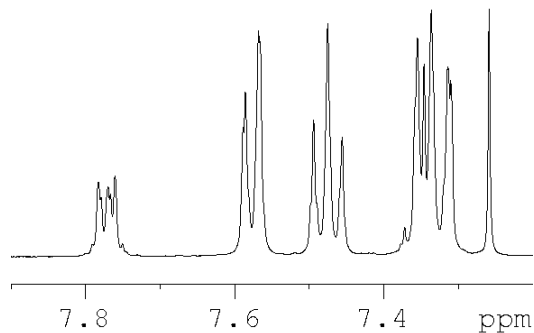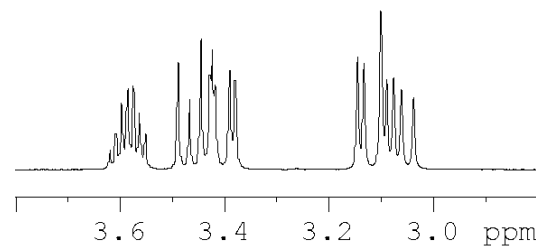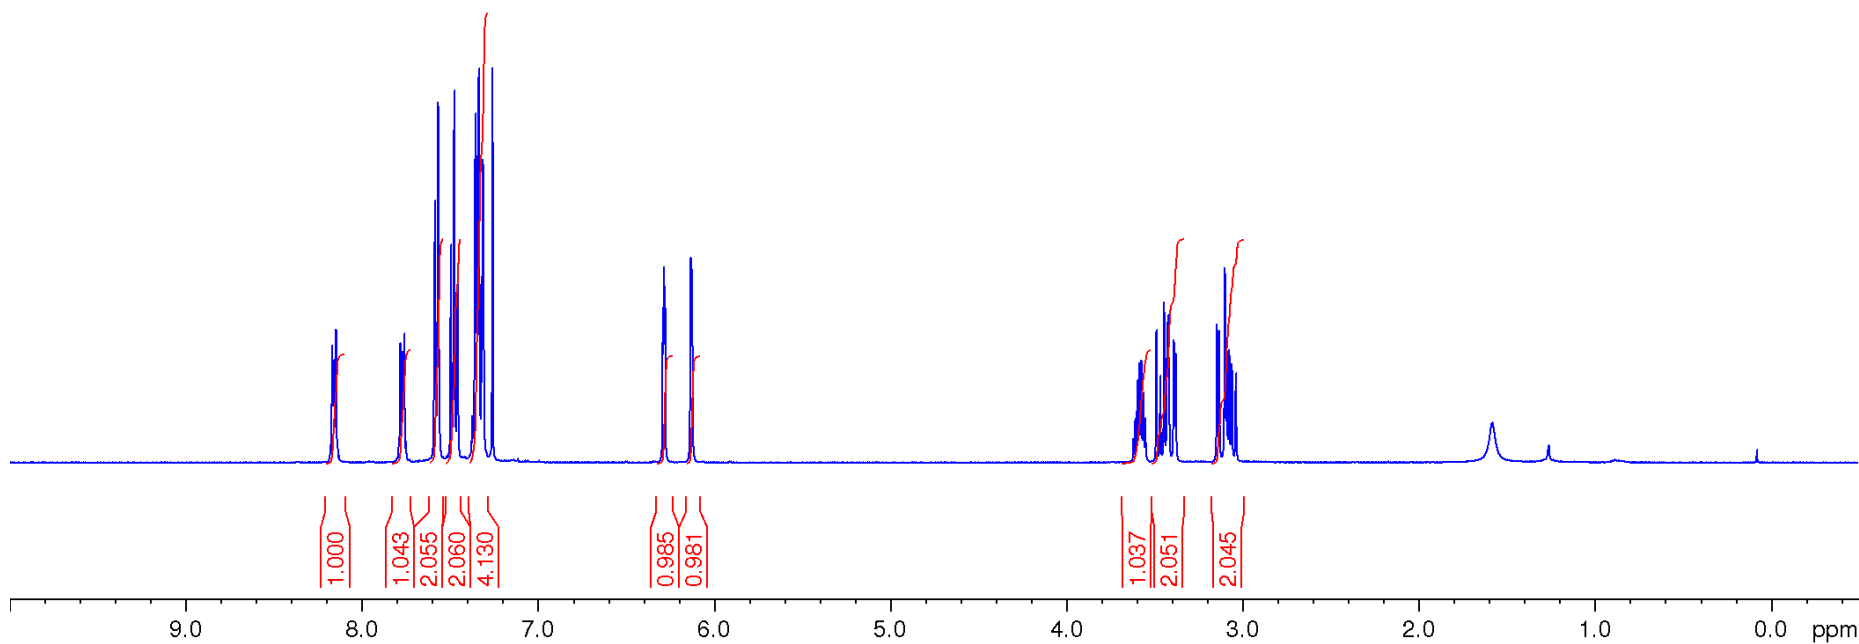

<sup>13</sup>C NMR-spectrum (100 MHz, CDCl<sub>3</sub>)

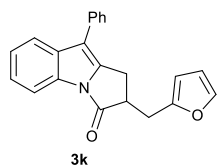

172.697  
152.195  
142.048  
138.255  
133.923  
133.526  
130.890  
129.103  
129.039  
128.527  
127.991  
126.945  
125.581  
124.554  
123.937  
119.871  
115.062  
114.120  
110.475  
107.208  
77.474  
77.156  
76.839  
45.998  
29.816  
26.247

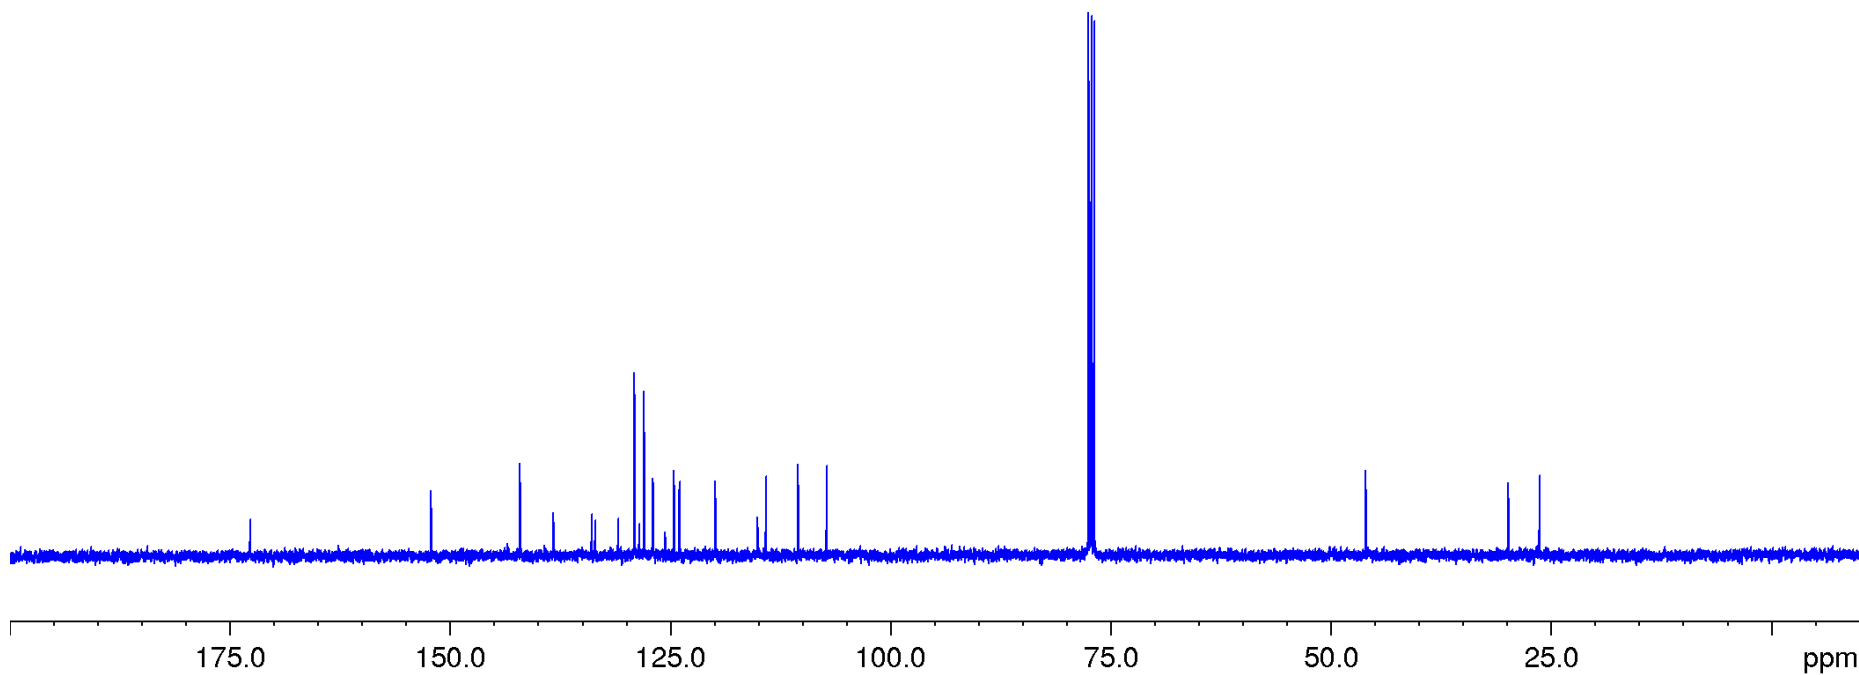

# DEPT 135 NMR-spectrum (CDCl<sub>3</sub>)

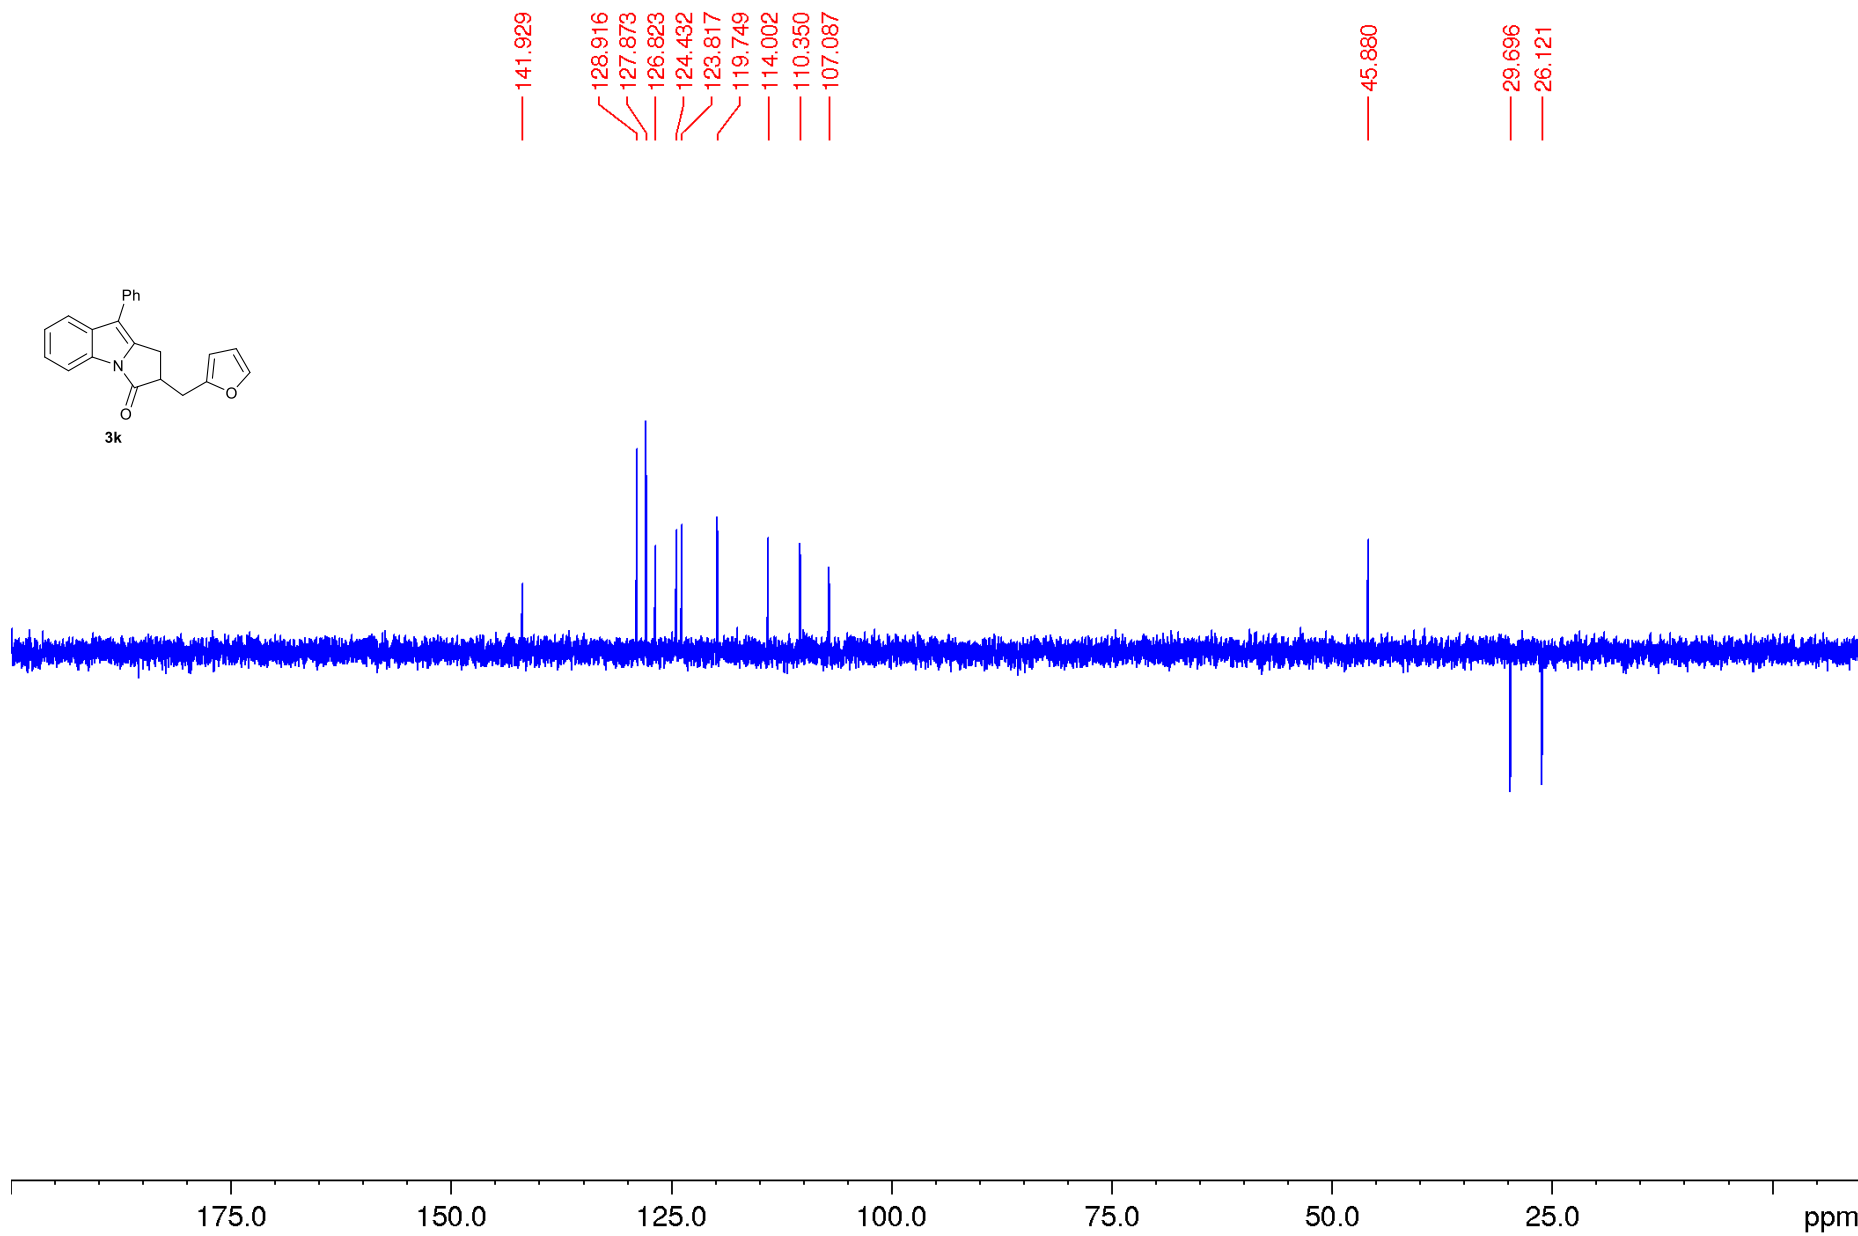

# $^1\text{H}$ NMR-spectrum (400 MHz, $\text{CDCl}_3$ )

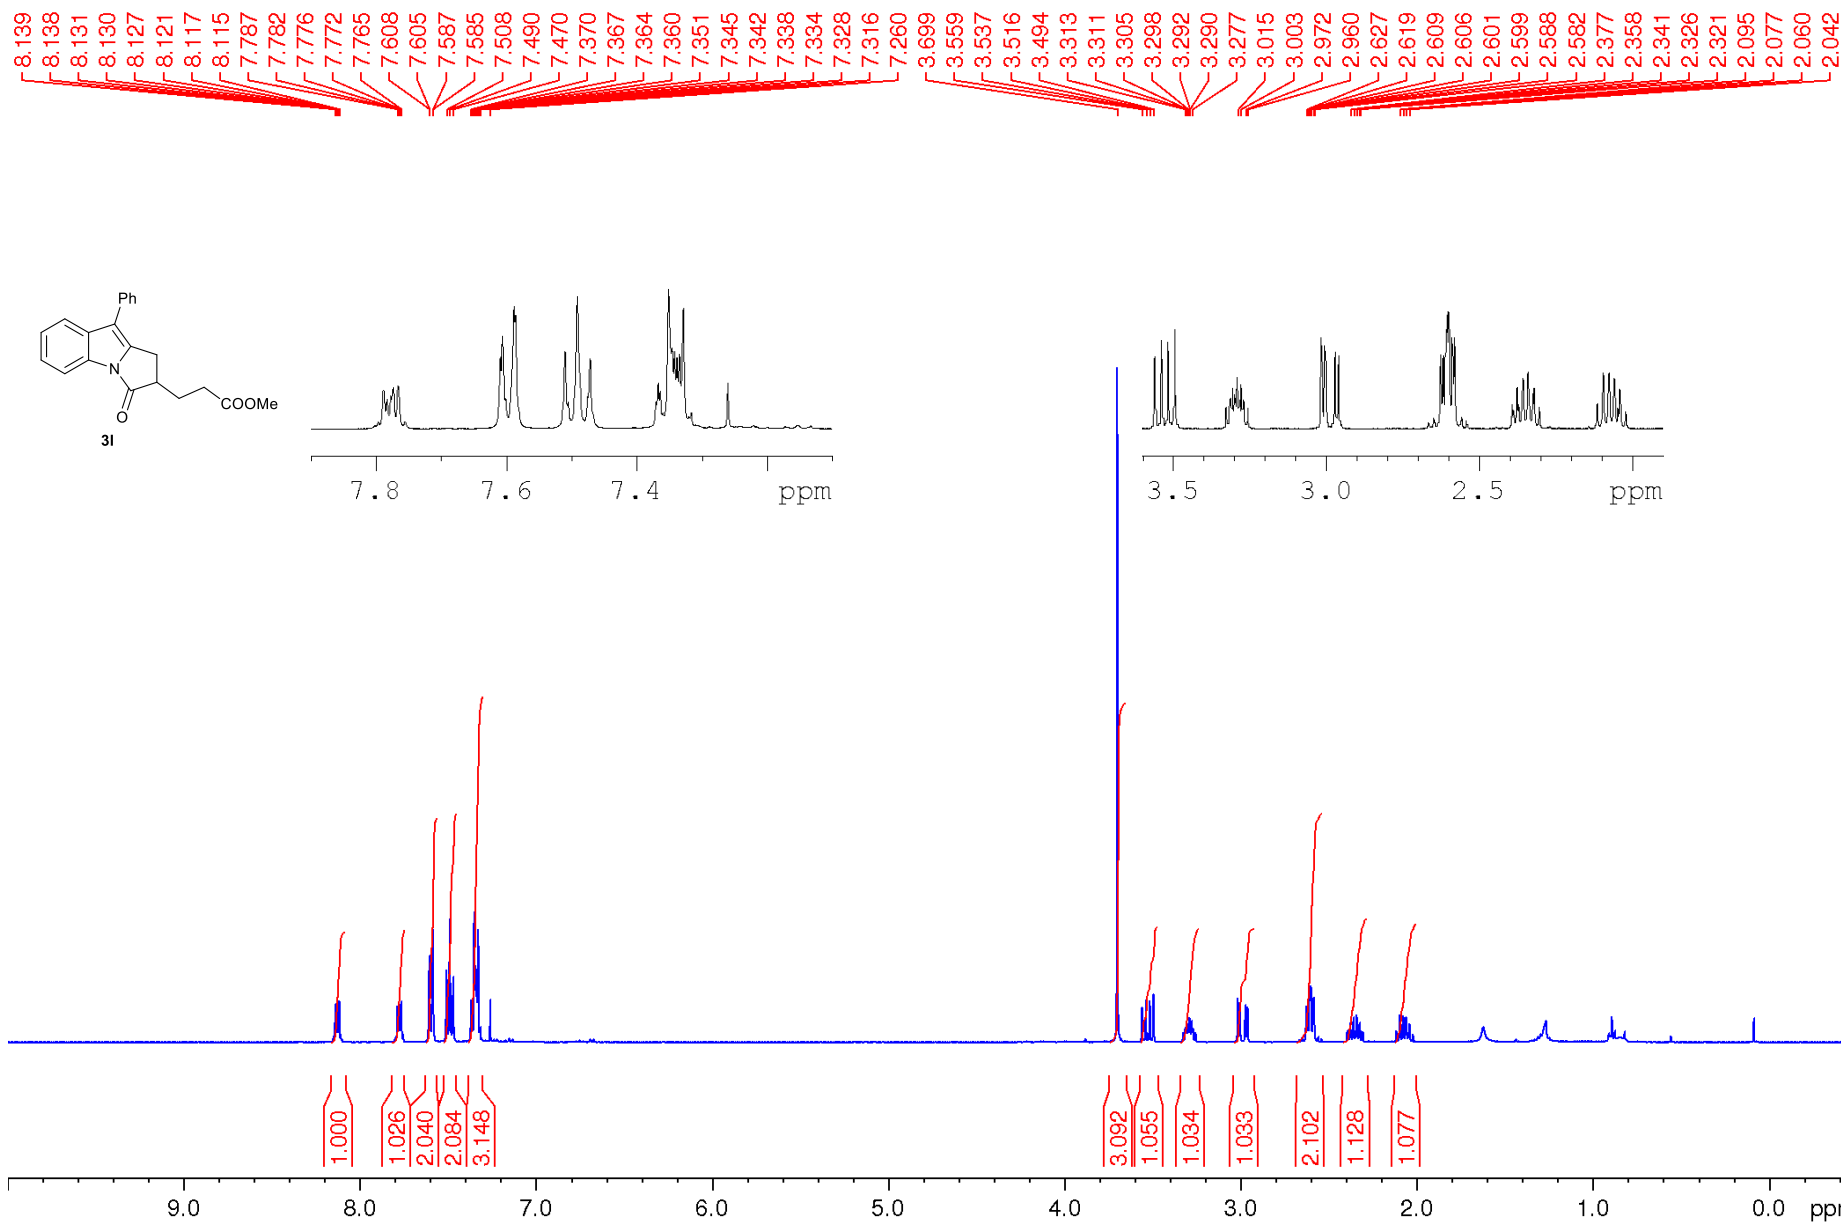

$^{13}\text{C}$  NMR-spectrum (100 MHz,  $\text{CDCl}_3$ )

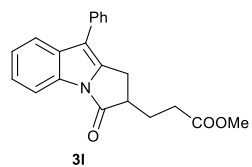

173.214  
173.180

137.993  
133.850  
133.505  
130.866  
129.068  
127.966  
126.981  
124.545  
123.970  
119.893  
115.041  
114.090

77.472  
77.154  
76.837

51.900  
45.637

31.435  
27.198  
26.788

175.0

150.0

125.0

100.0

75.0

50.0

25.0

ppm

# DEPT 135 NMR-spectrum (CDCl<sub>3</sub>)

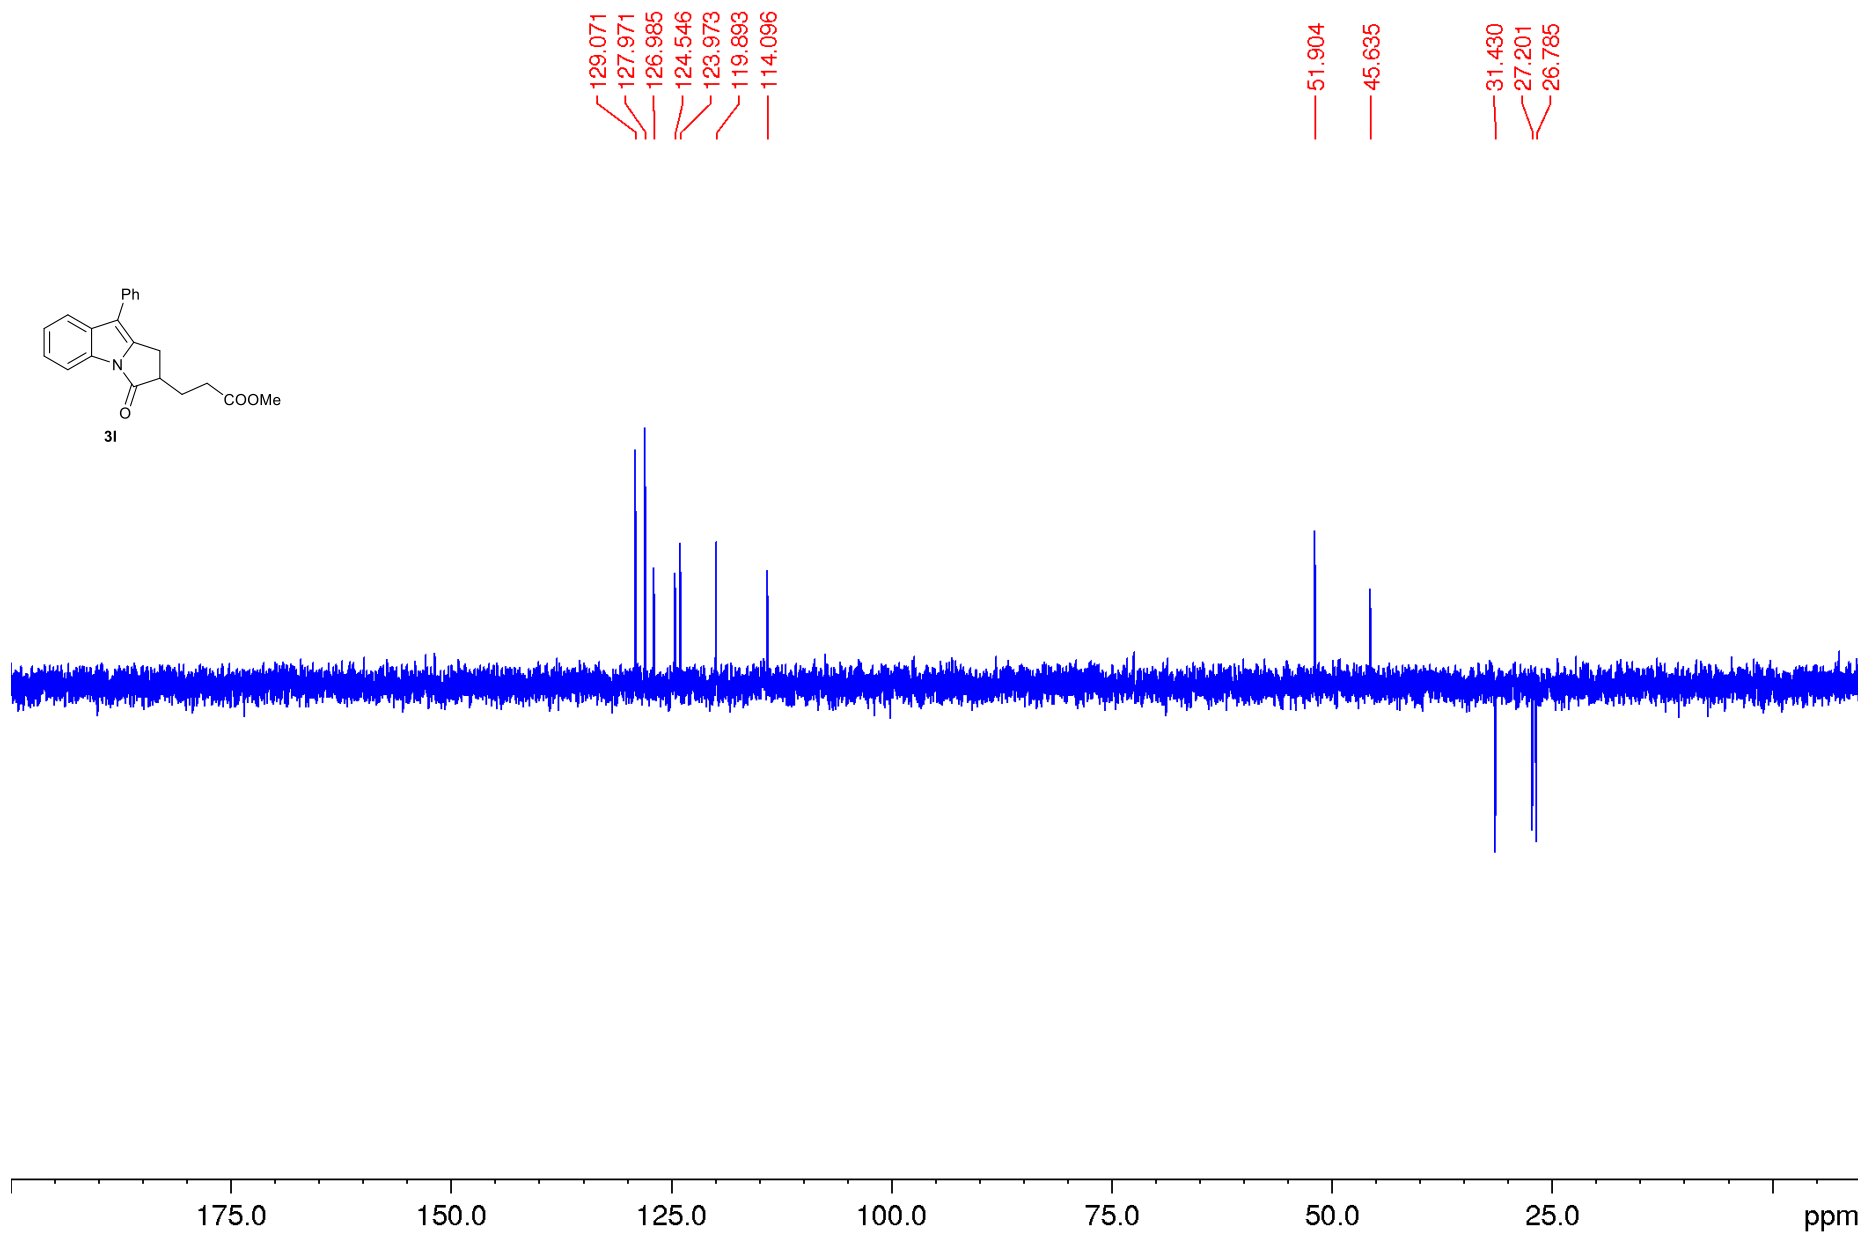

# $^1\text{H}$ NMR-spectrum (400 MHz, $\text{CDCl}_3$ )

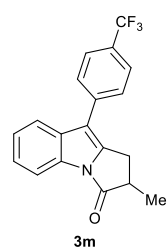

8.166  
8.156  
8.143  
7.762  
7.758  
7.749  
7.740  
7.727  
7.714  
7.692  
7.384  
7.371  
7.360  
7.352  
7.348  
7.335  
7.257

3.595  
3.574  
3.552  
3.530  
3.354  
3.336  
3.323  
3.317  
3.304  
3.296  
3.284  
3.265  
2.972  
2.960  
2.929  
2.917  
1.520  
1.502

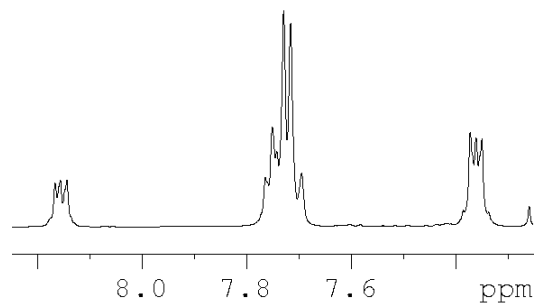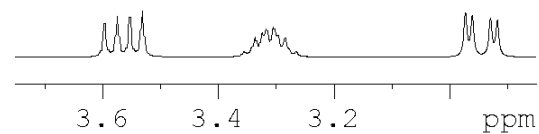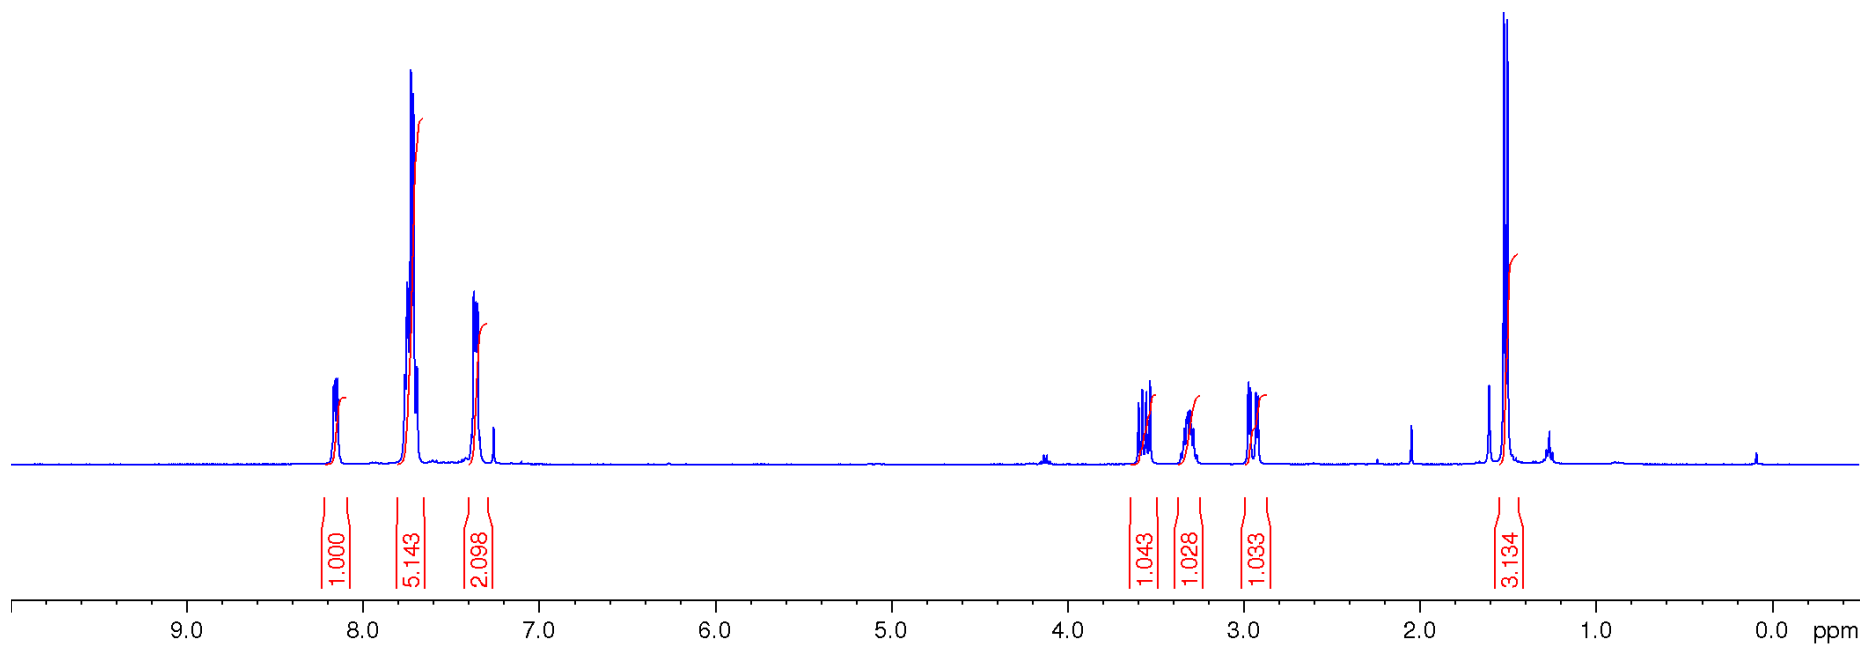



$^{13}\text{C}$  NMR-spectrum (100 MHz,  $\text{CDCl}_3$ )

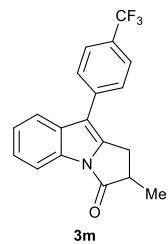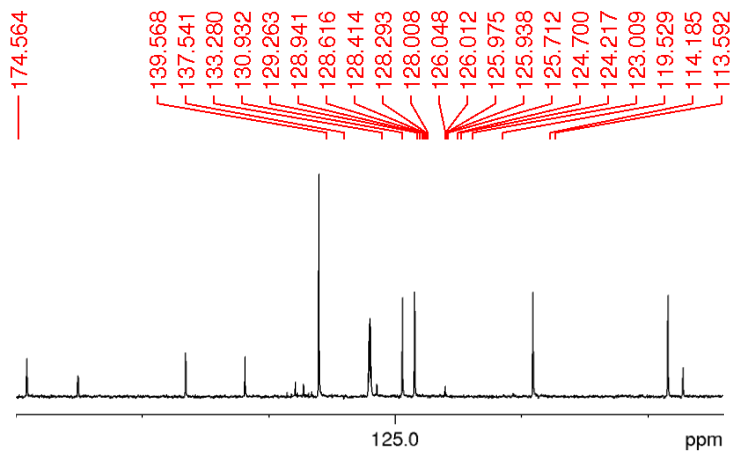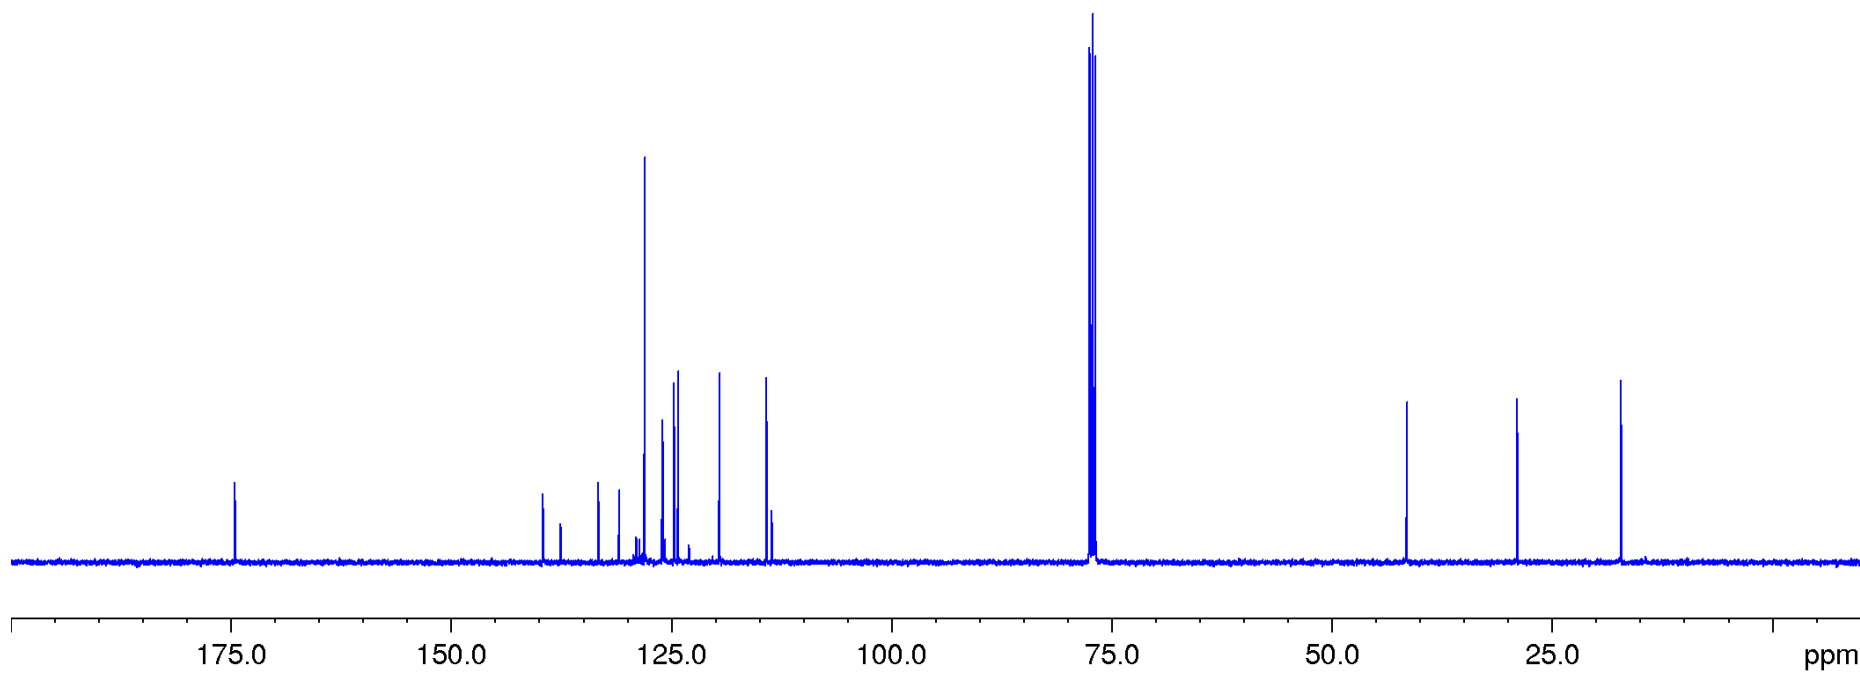

# DEPT 135 NMR-spectrum (CDCl<sub>3</sub>)

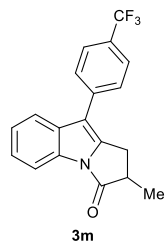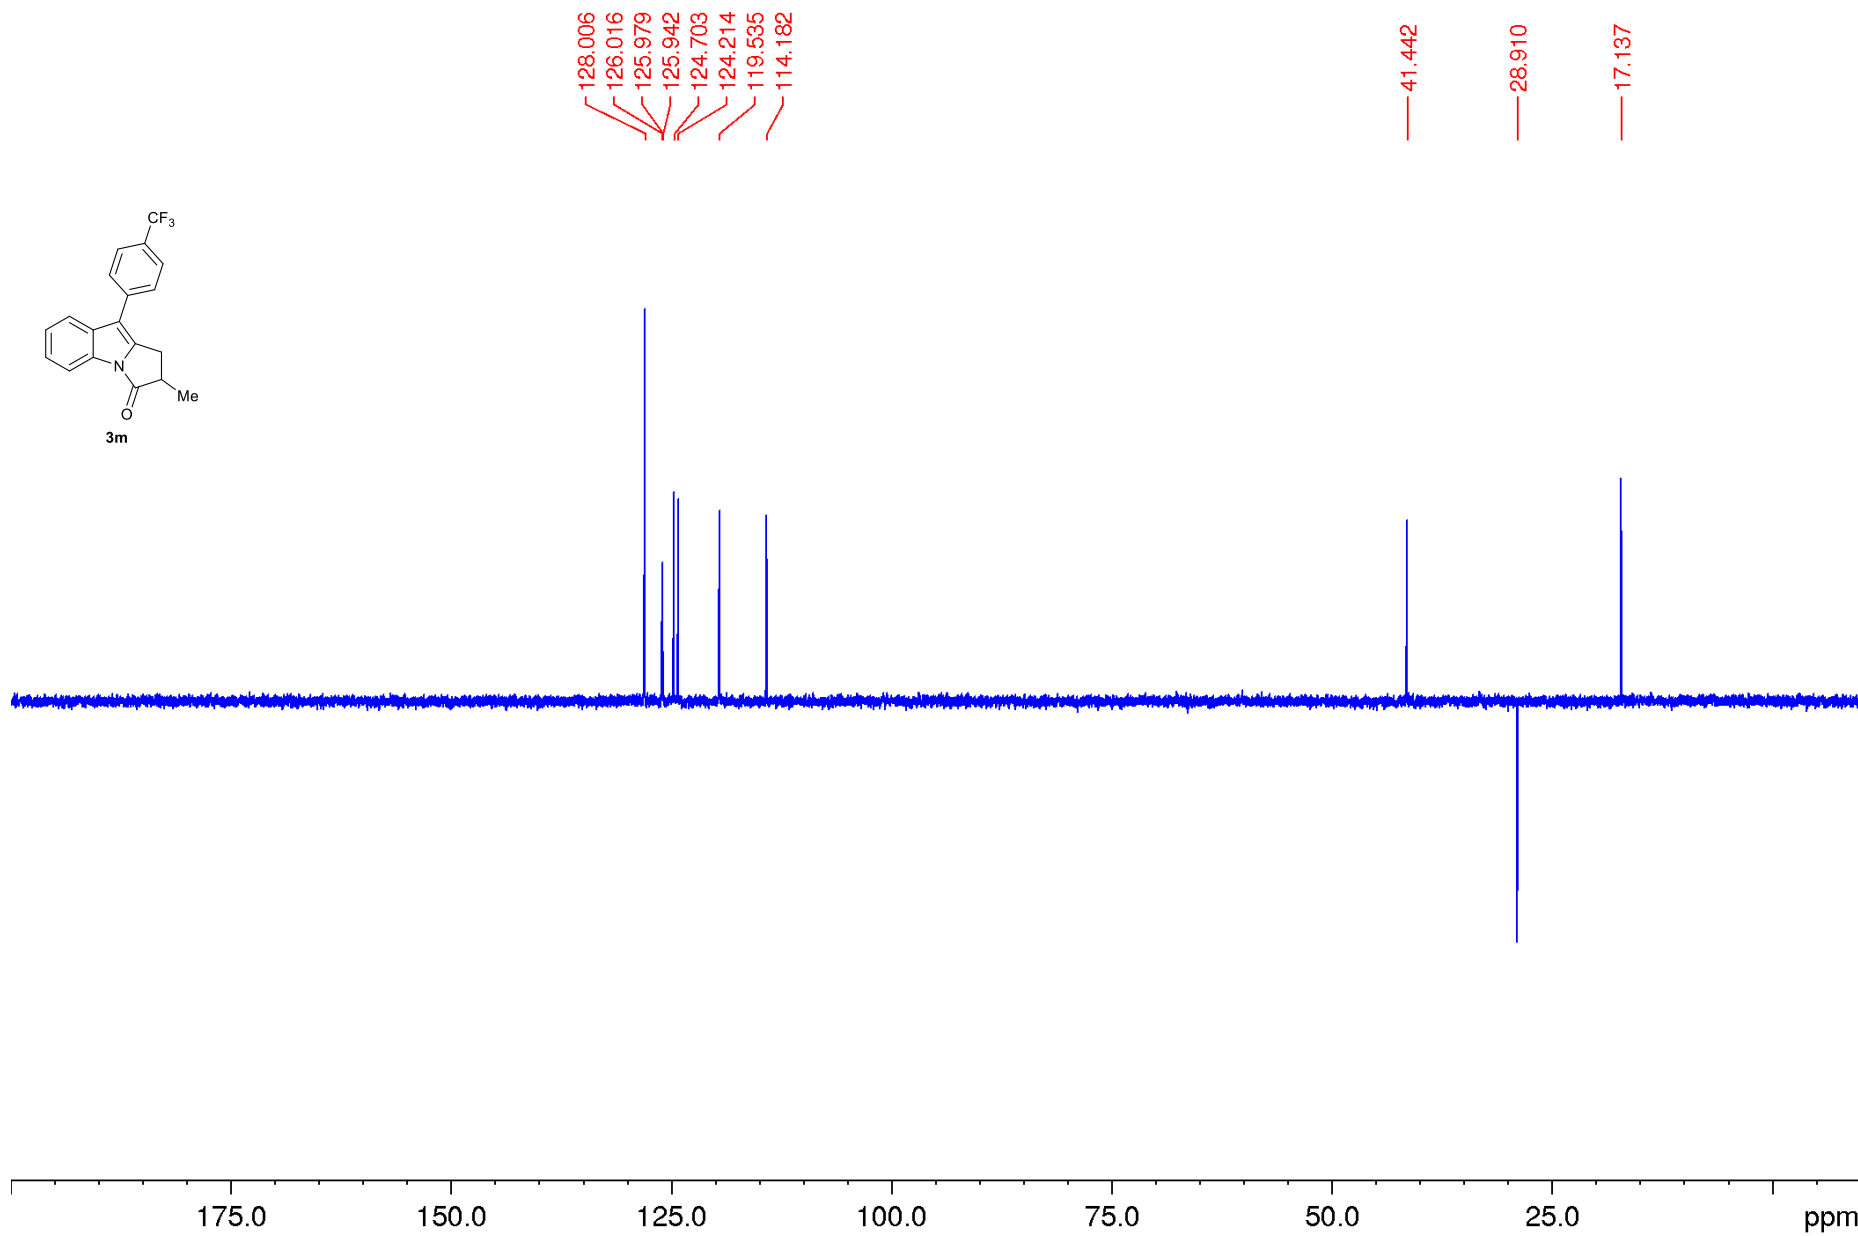

$^{19}\text{F}$  NMR-spectrum (376.5 MHz,  $\text{CDCl}_3$ )

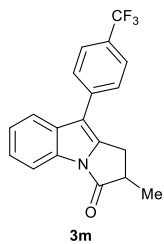

-62.423

0.0

-25.0

-50.0

-75.0

-100.0

-125.0

ppm

# $^1\text{H}$ NMR-spectrum (400 MHz, $\text{CDCl}_3$ )

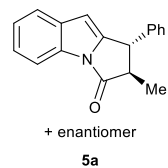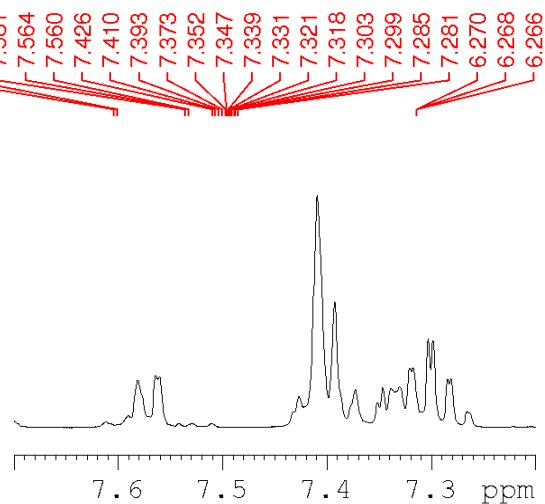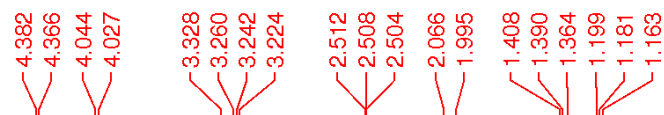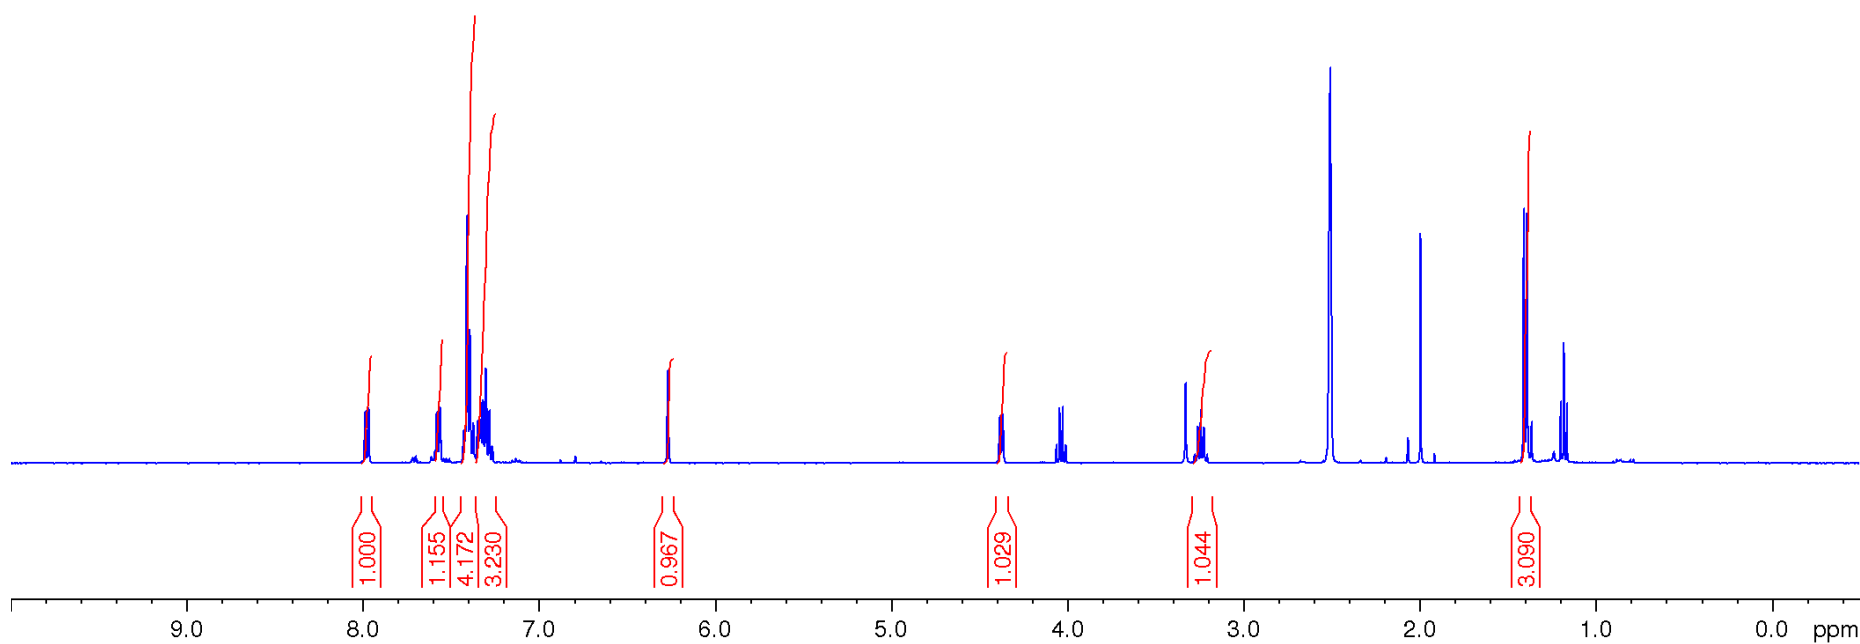

$^{13}\text{C}$  NMR-spectrum (100 MHz,  $\text{CDCl}_3$ )

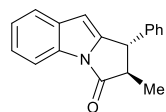

+ enantiomer

**5a**

— 172.920

— 145.864

— 140.110

— 134.745

— 129.788

— 128.794

— 127.770

— 127.317

— 123.807

— 123.262

— 120.959

— 112.905

— 99.960

— 50.933

— 46.812

— 40.114

— 39.906

— 39.697

— 39.488

— 39.280

— 39.071

— 38.862

— 14.023

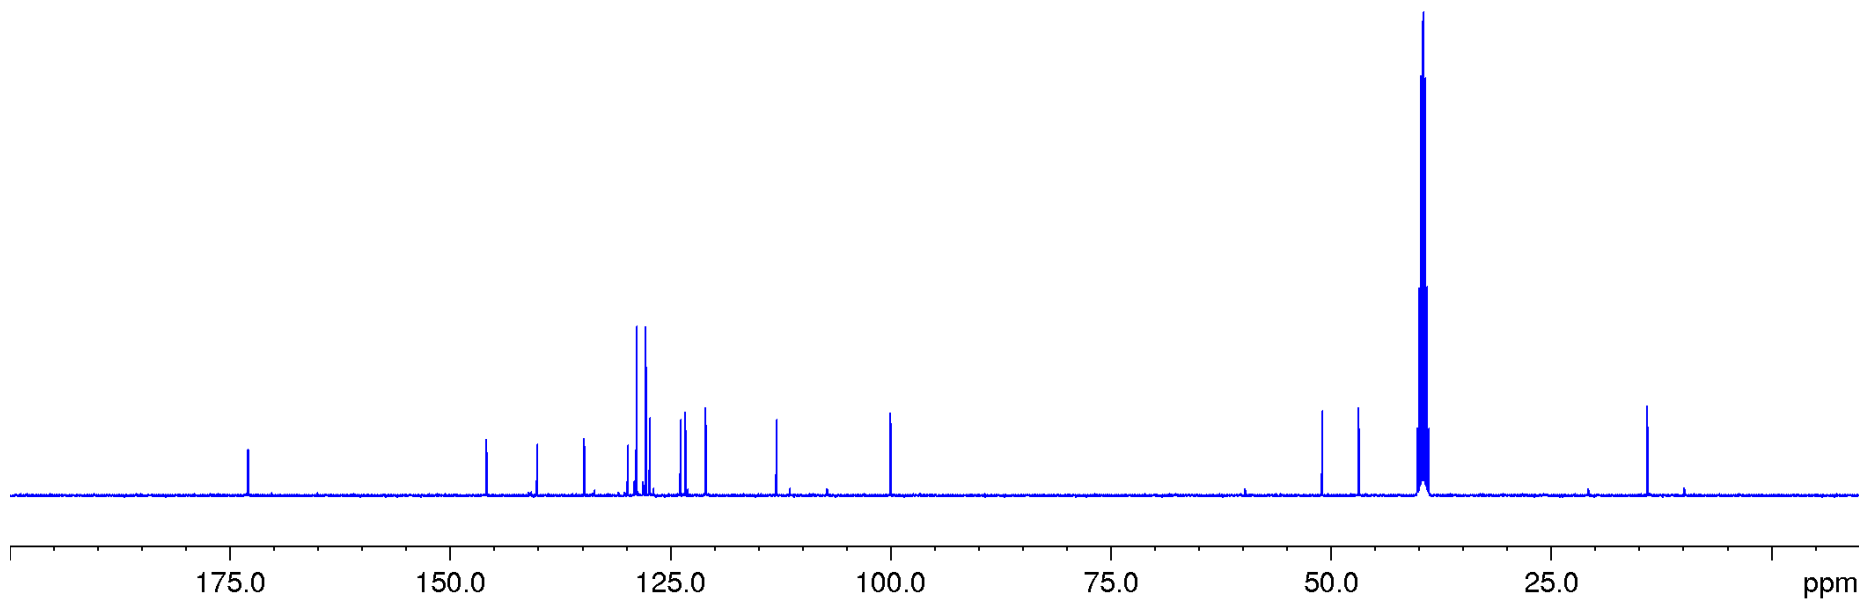

# DEPT 135 NMR-spectrum (CDCl<sub>3</sub>)

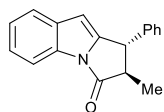

+ enantiomer

**5a**

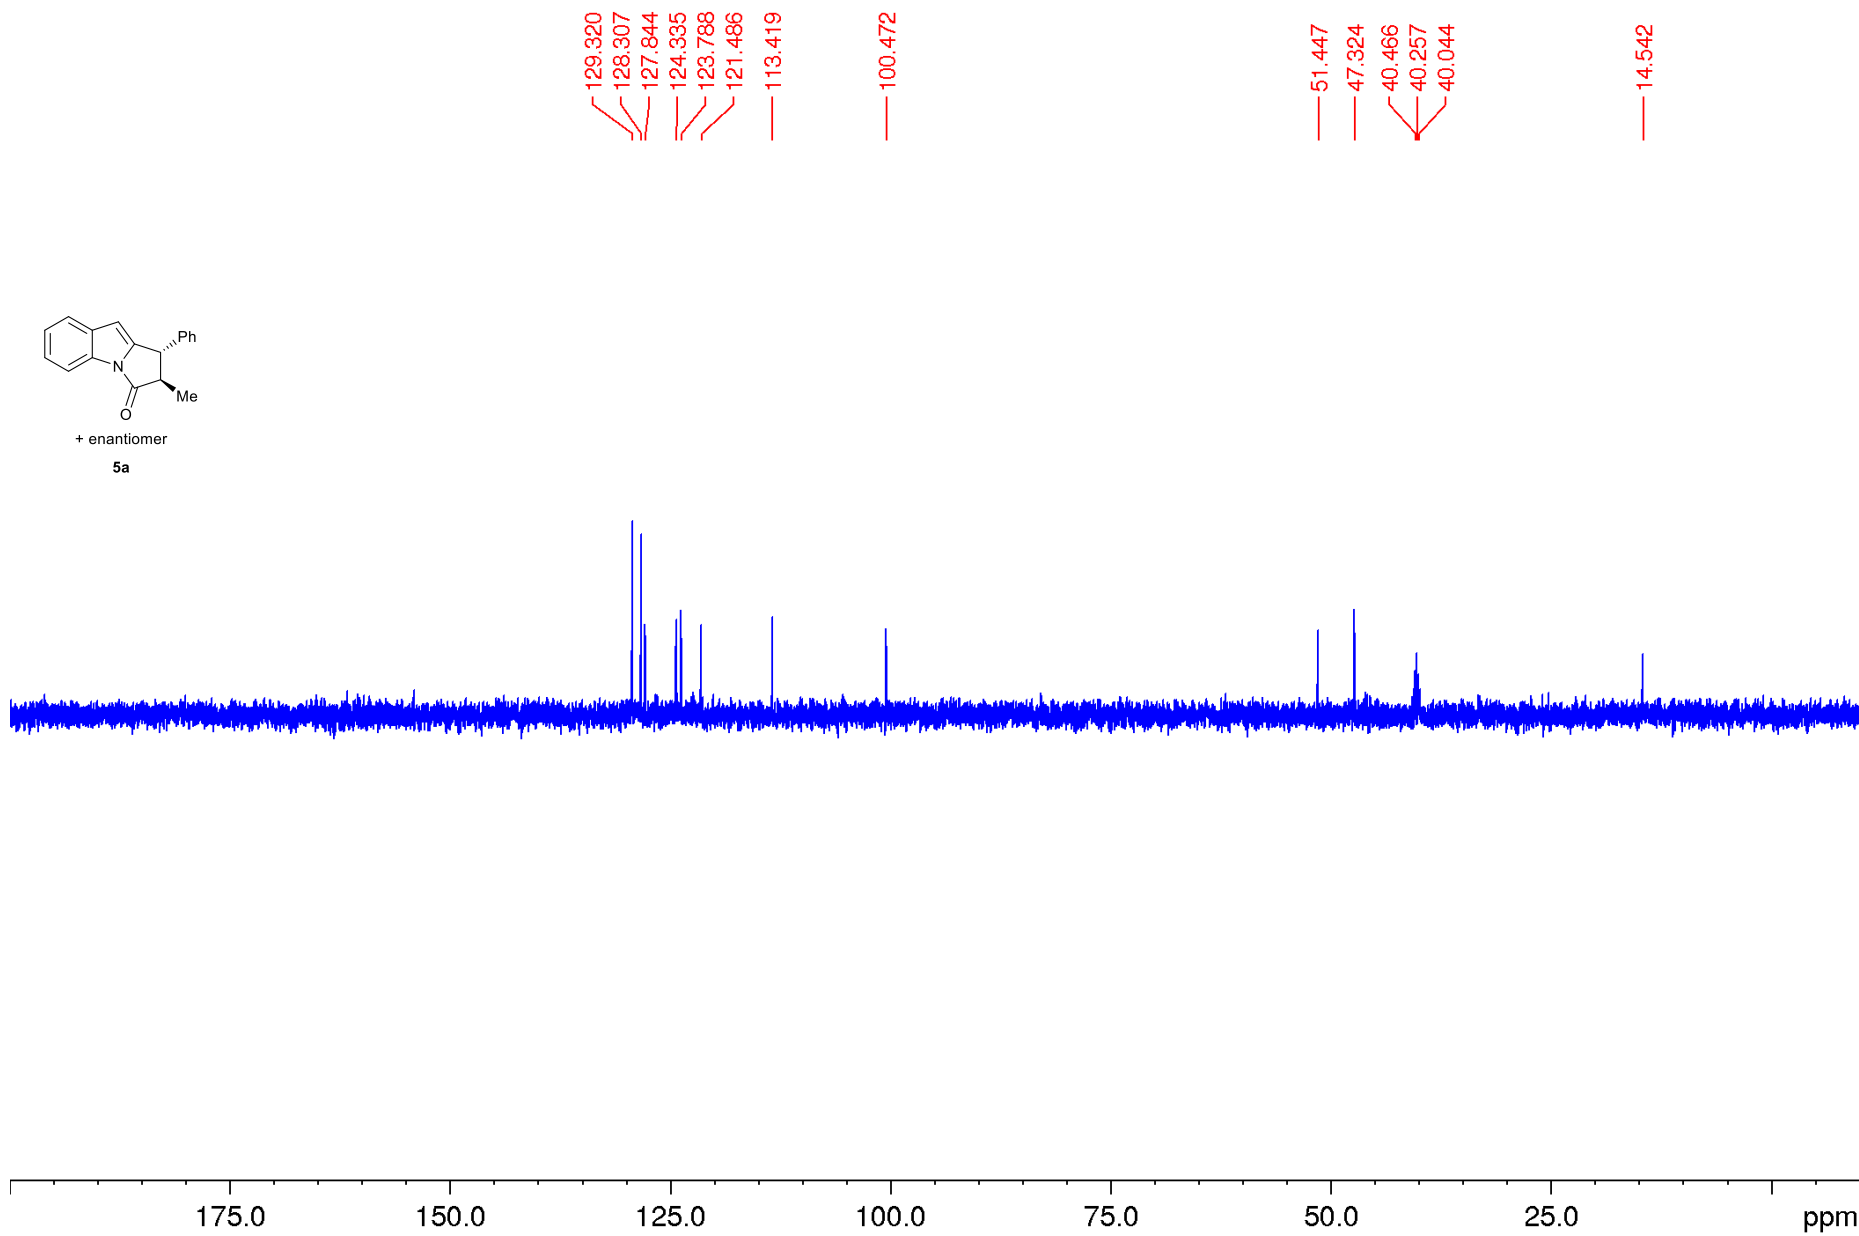

# $^1\text{H}$ NMR-spectrum (400 MHz, $\text{DMSO-}d_6$ )

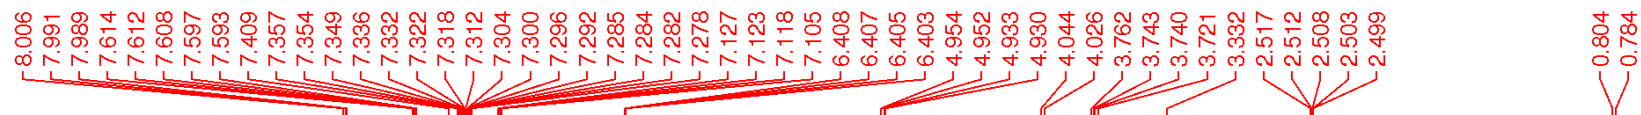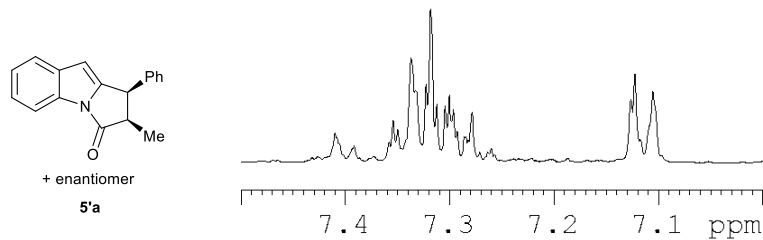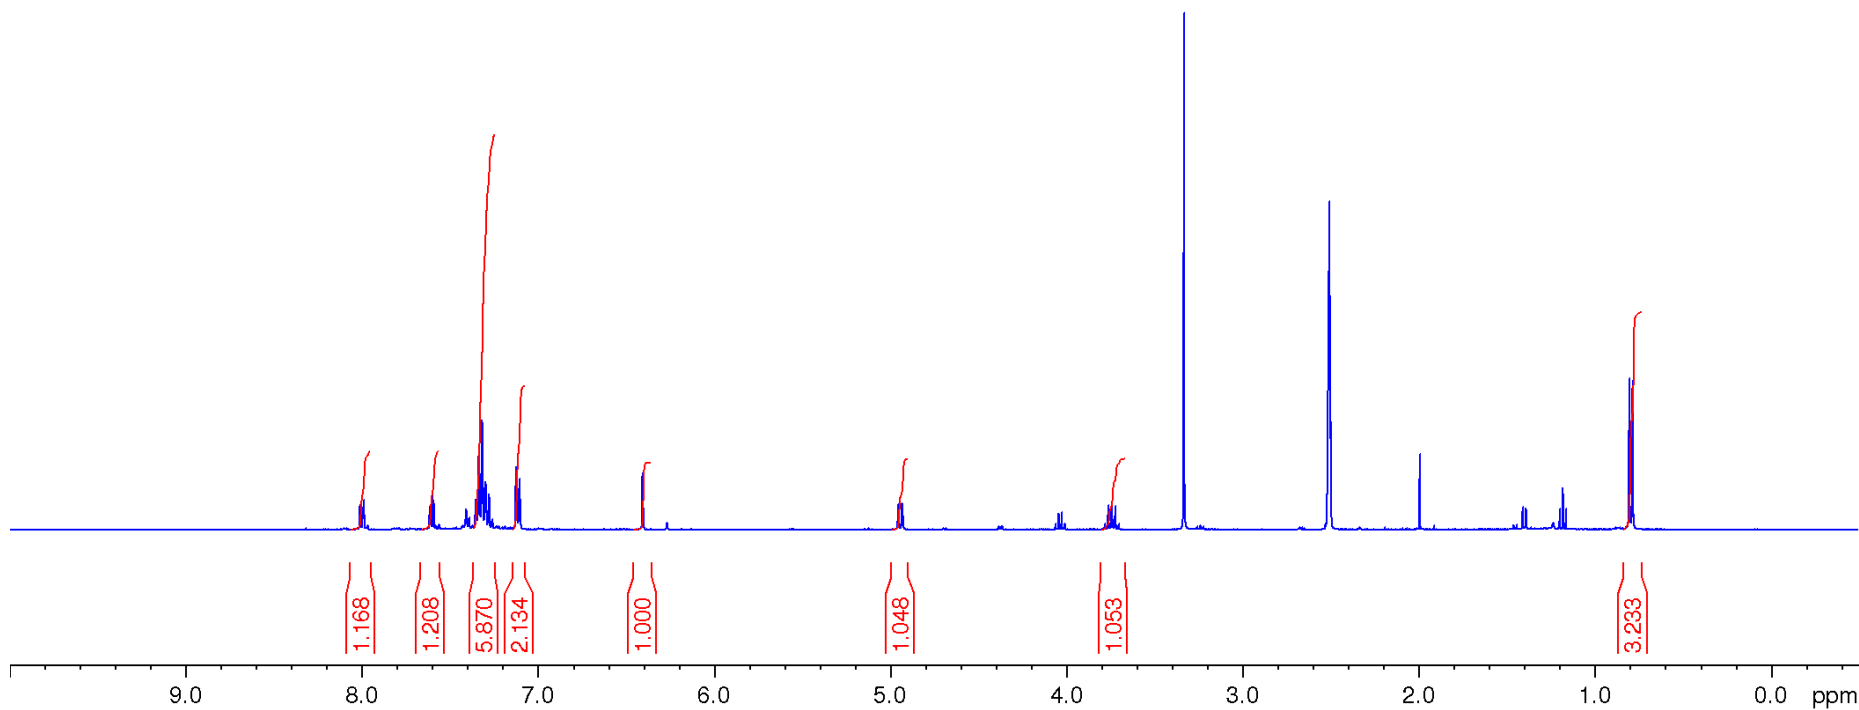

$^{13}\text{C}$  NMR-spectrum (100 MHz,  $\text{DMSO-}d_6$ )

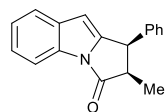

+ enantiomer

**5'a**

173.871

145.987

138.886

134.847

129.575

128.794

128.609

128.422

127.774

127.117

123.901

123.282

121.003

112.929

100.629

45.545

42.372

40.114

39.905

39.696

39.488

39.279

39.070

38.862

12.762

175.0

150.0

125.0

100.0

75.0

50.0

25.0

ppm



# $^1\text{H}$ NMR-spectrum (400 MHz, $\text{CDCl}_3$ )

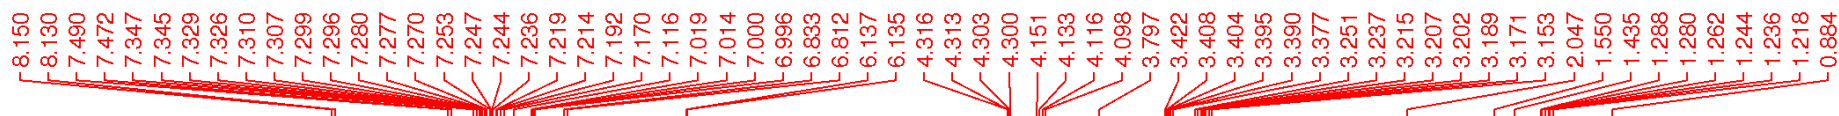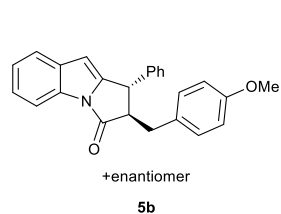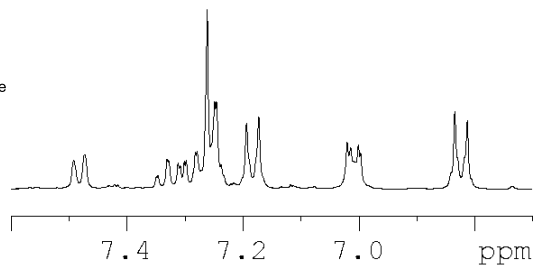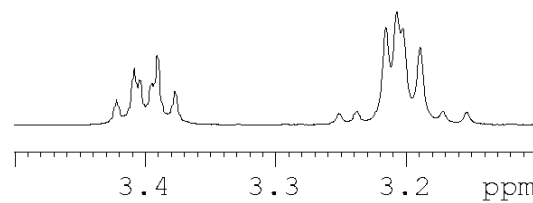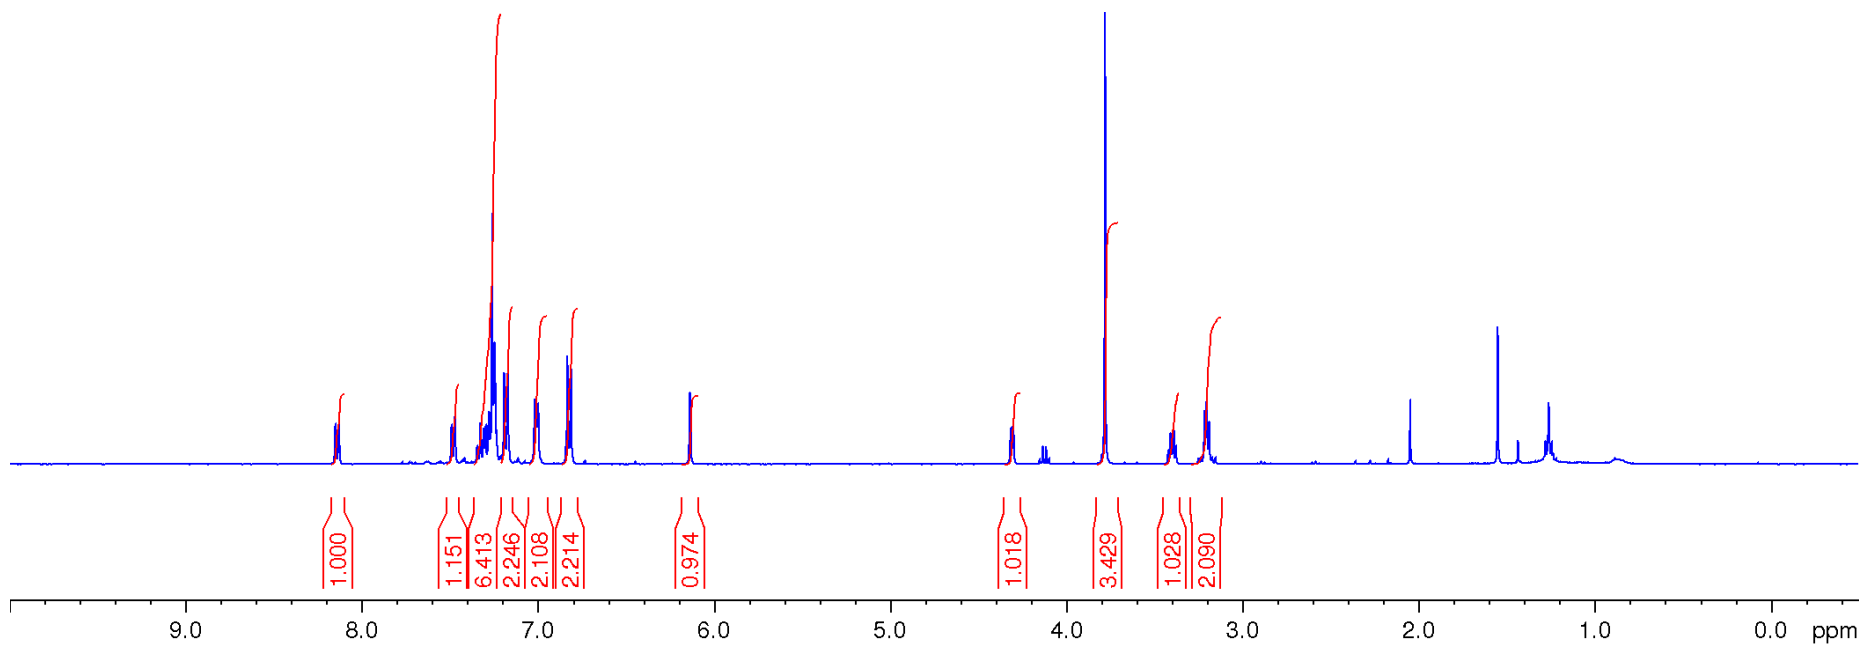

$^{13}\text{C}$  NMR-spectrum (100 MHz,  $\text{CDCl}_3$ )

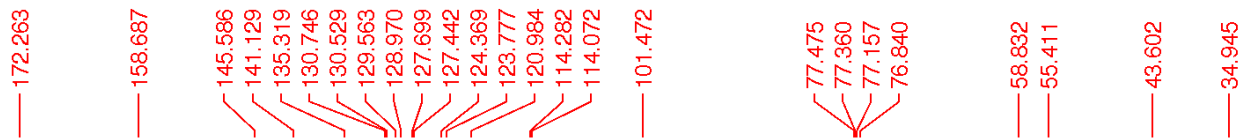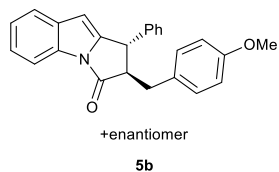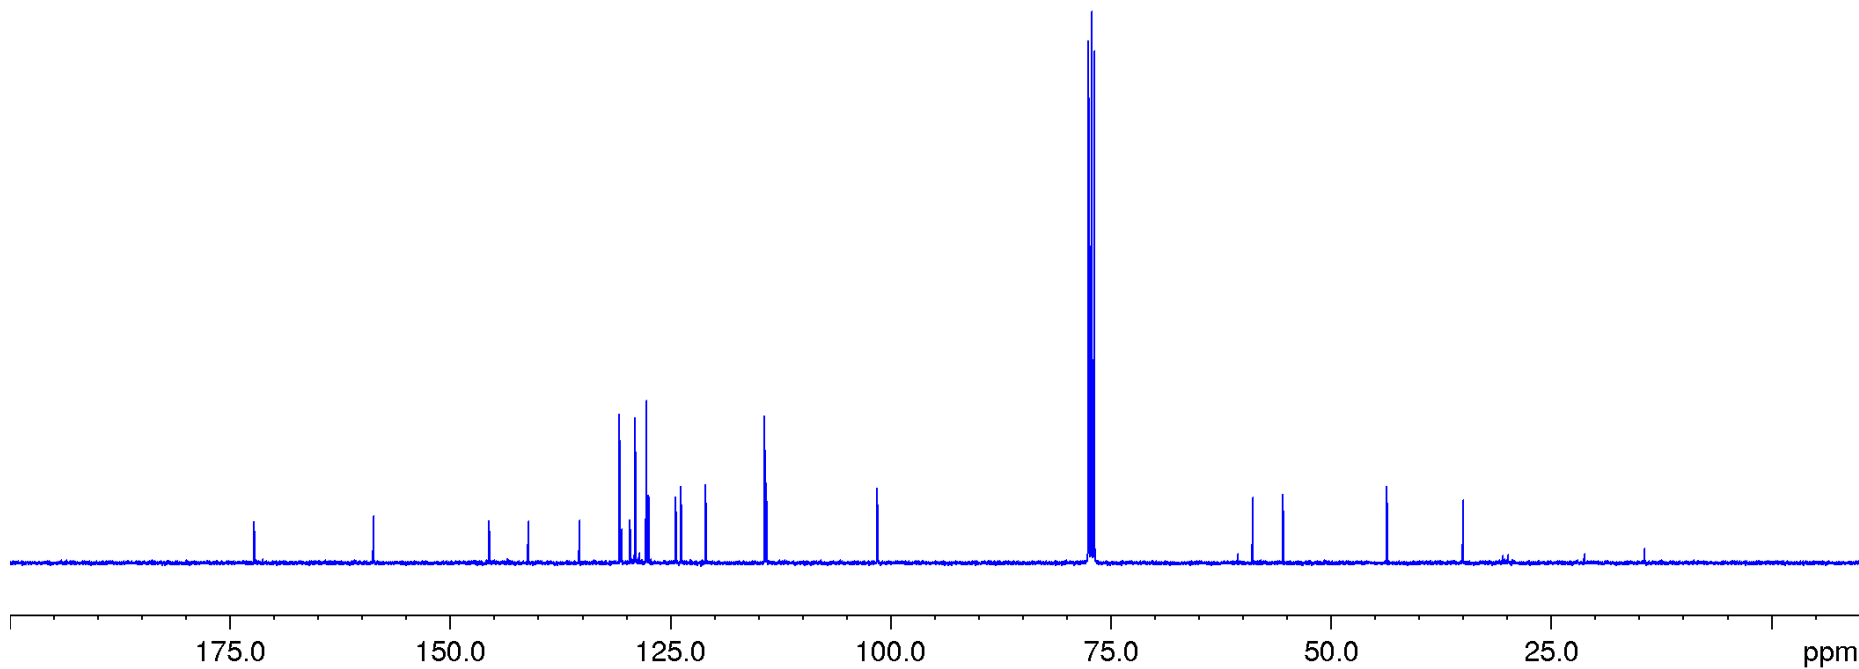

# DEPT 135 NMR-spectrum (CDCl<sub>3</sub>)

130.718  
128.947  
127.671  
127.416  
124.345  
123.755  
120.957  
114.268  
114.052  
101.447

58.808  
55.393  
43.597  
34.941

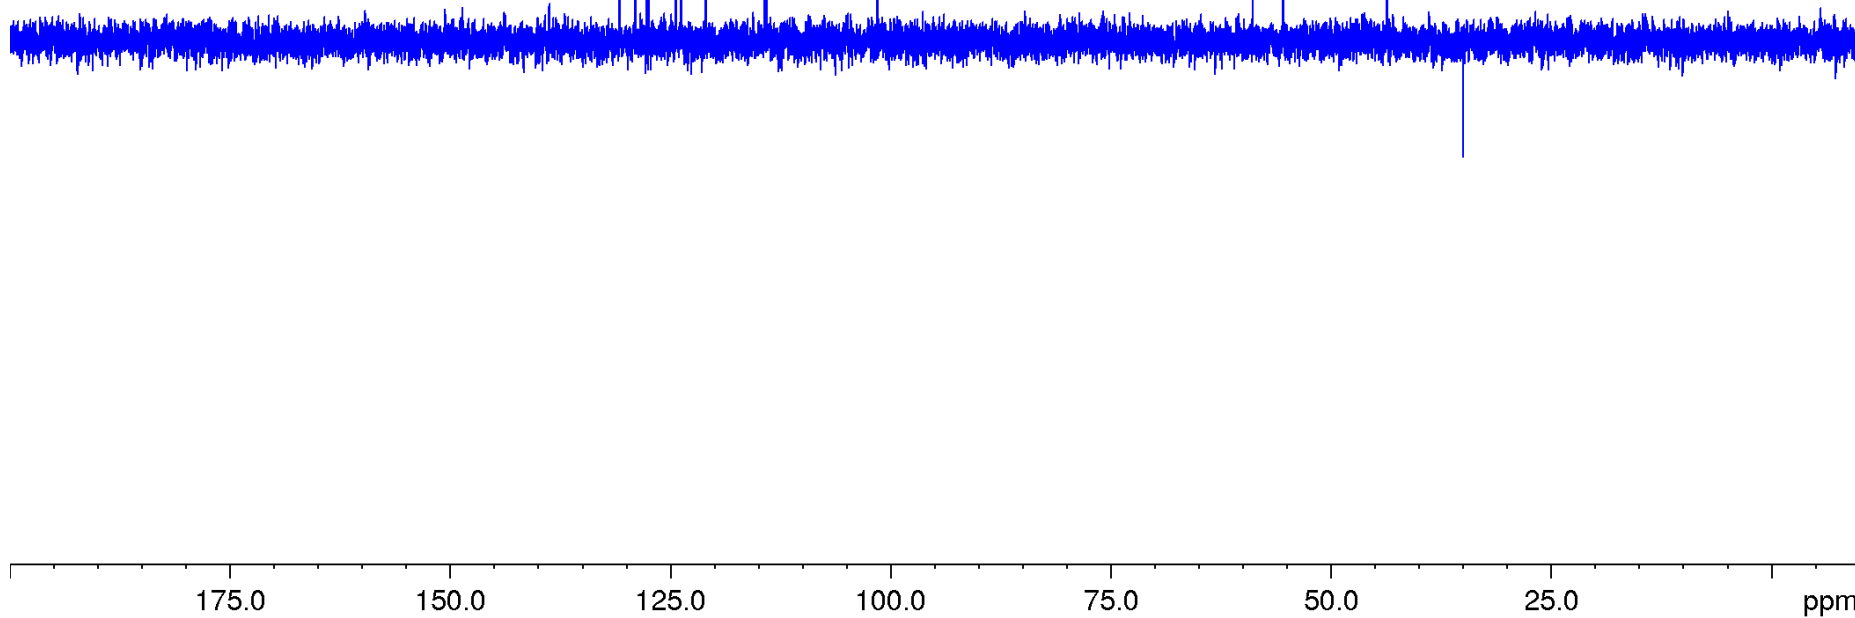

# $^1\text{H}$ NMR-spectrum (400 MHz, $\text{CDCl}_3$ )

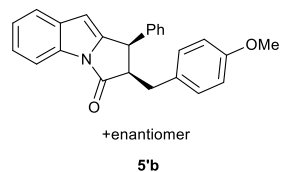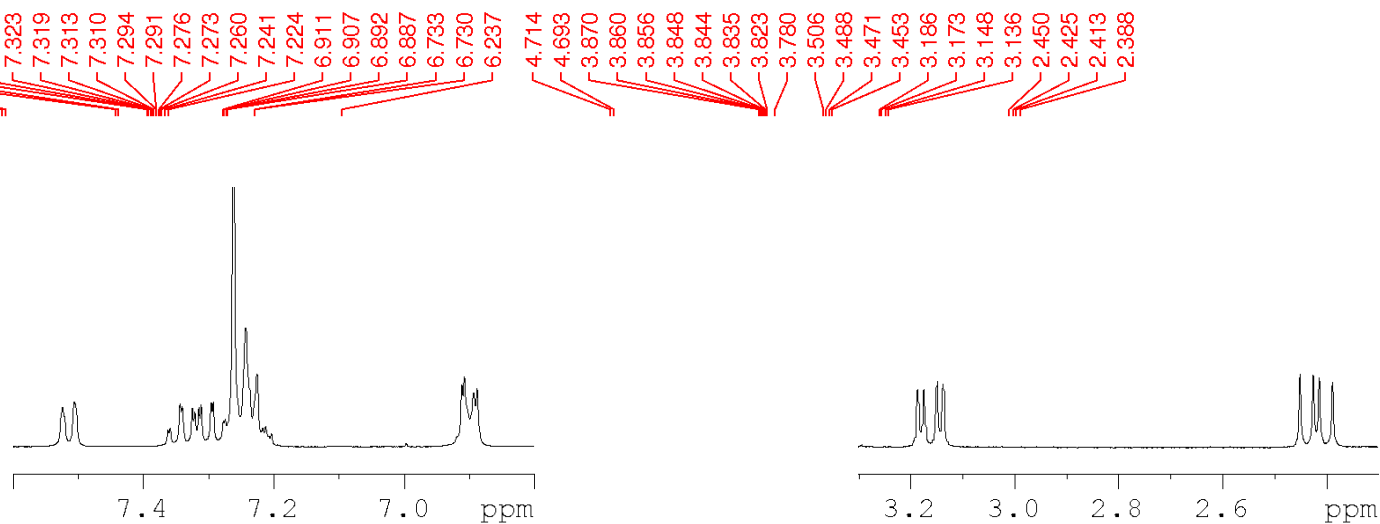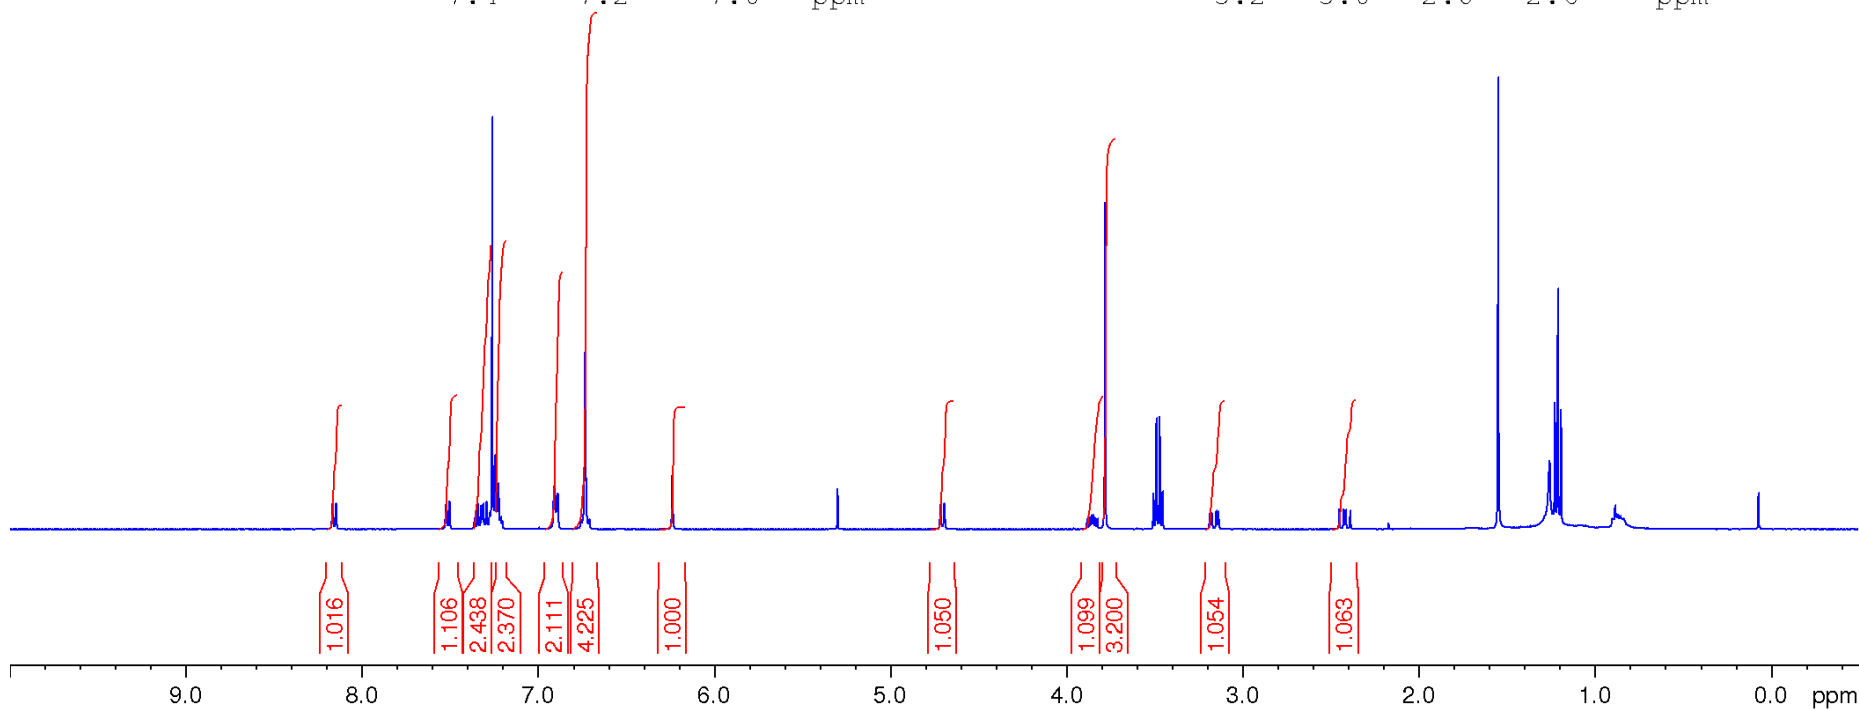

$^{13}\text{C}$  NMR-spectrum (100 MHz,  $\text{CDCl}_3$ )

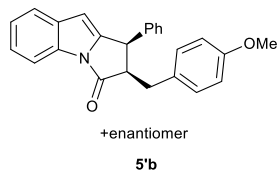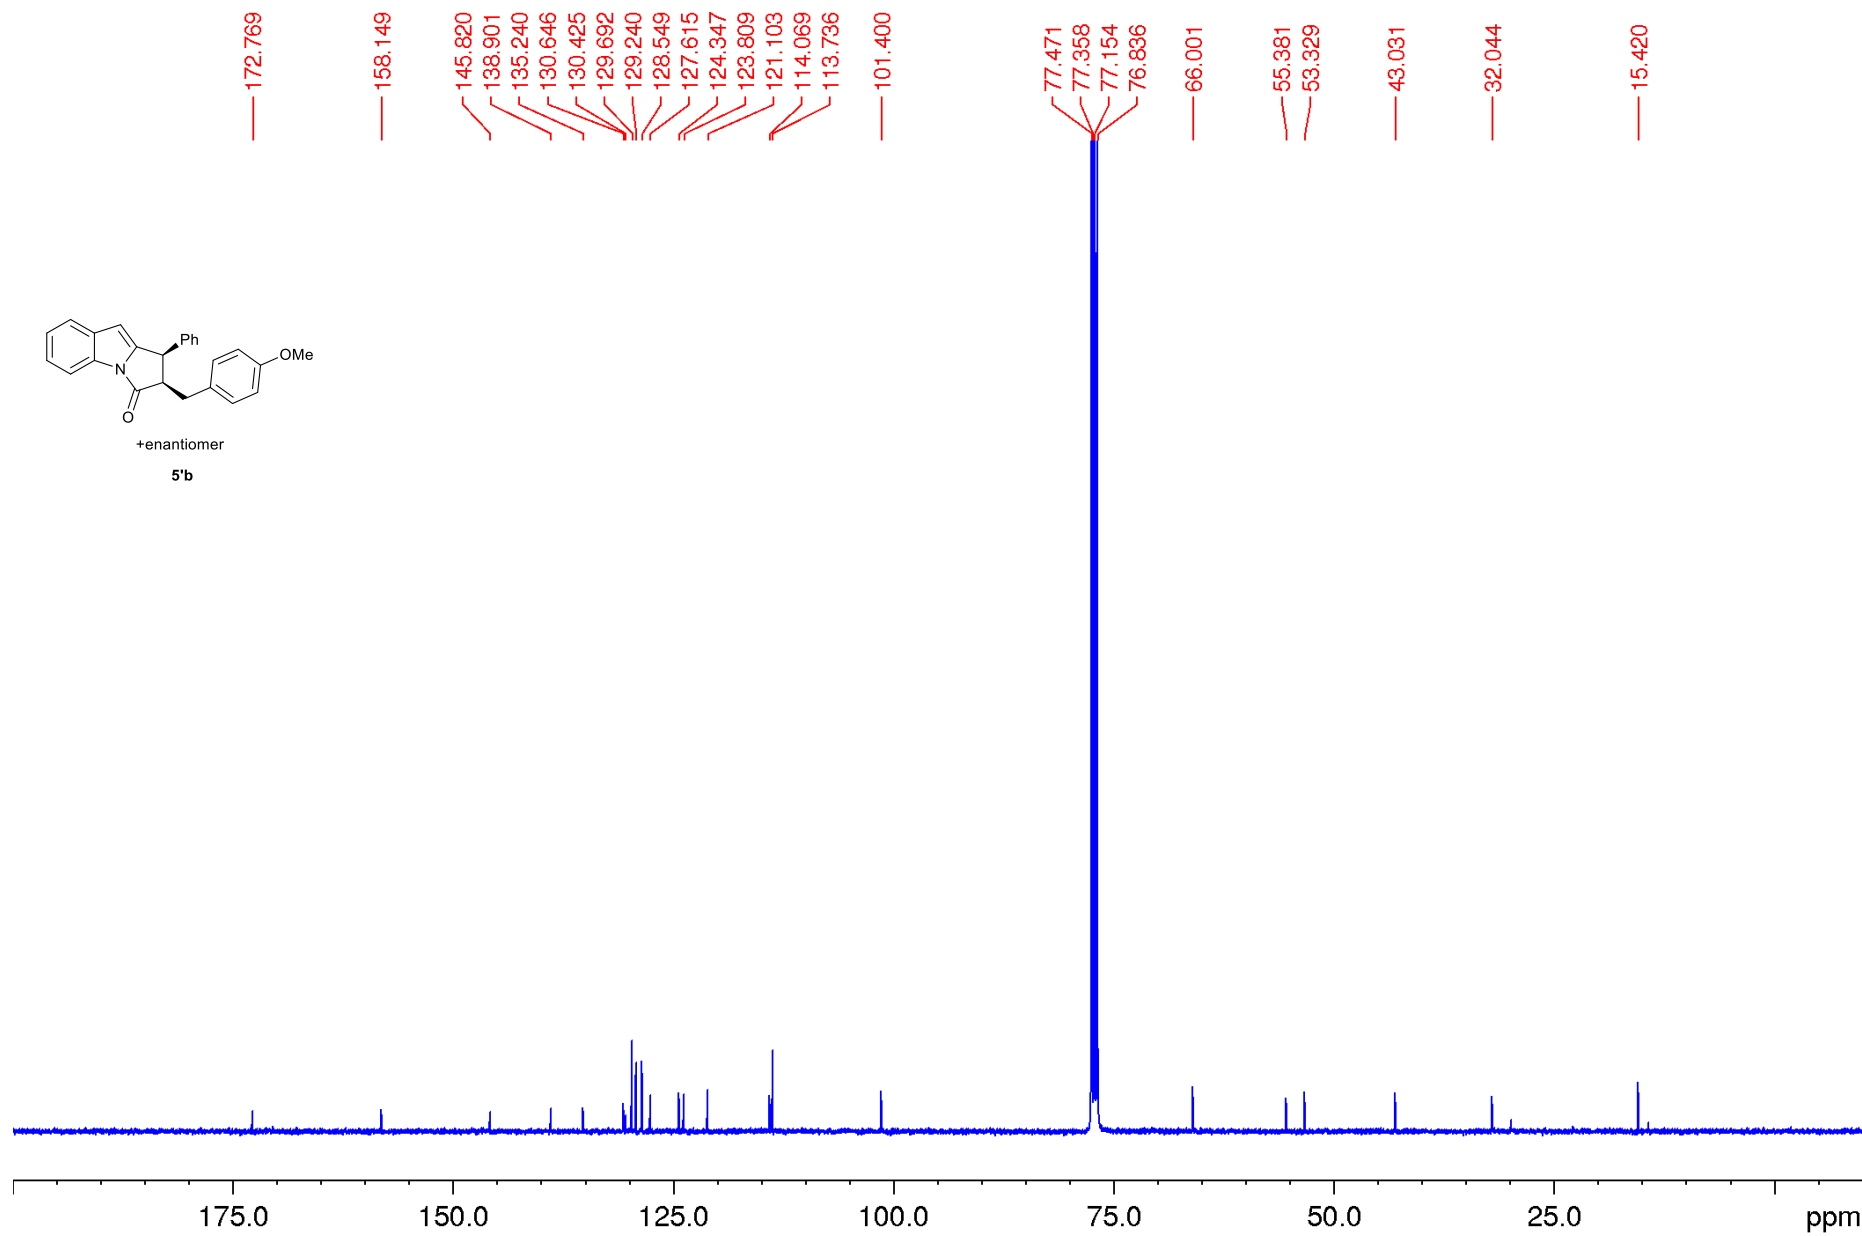

# $^1\text{H}$ NMR-spectrum (400 MHz, $\text{CDCl}_3$ )

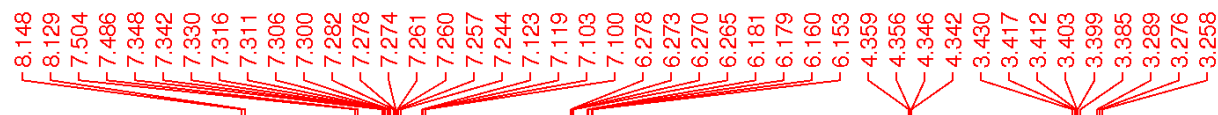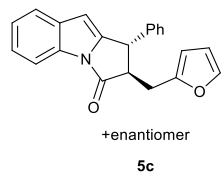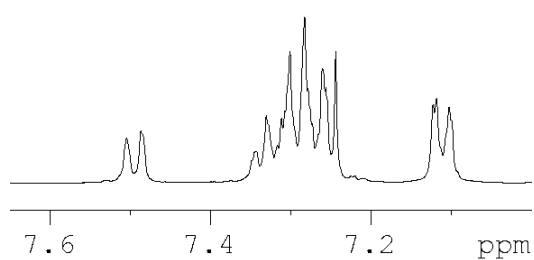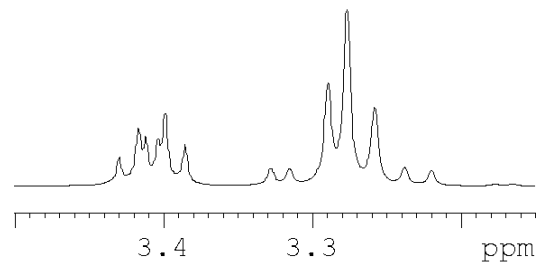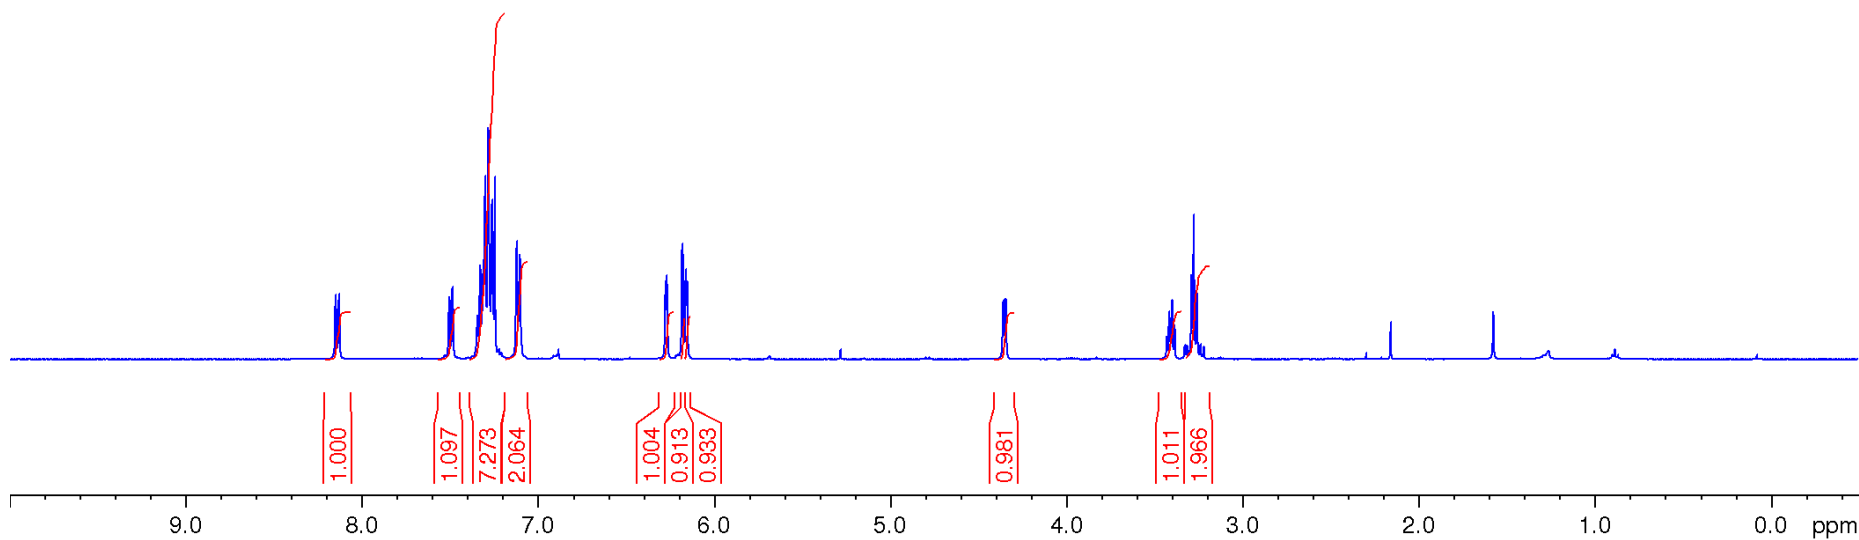

$^{13}\text{C}$  NMR-spectrum (100 MHz,  $\text{CDCl}_3$ )

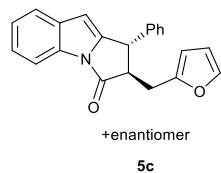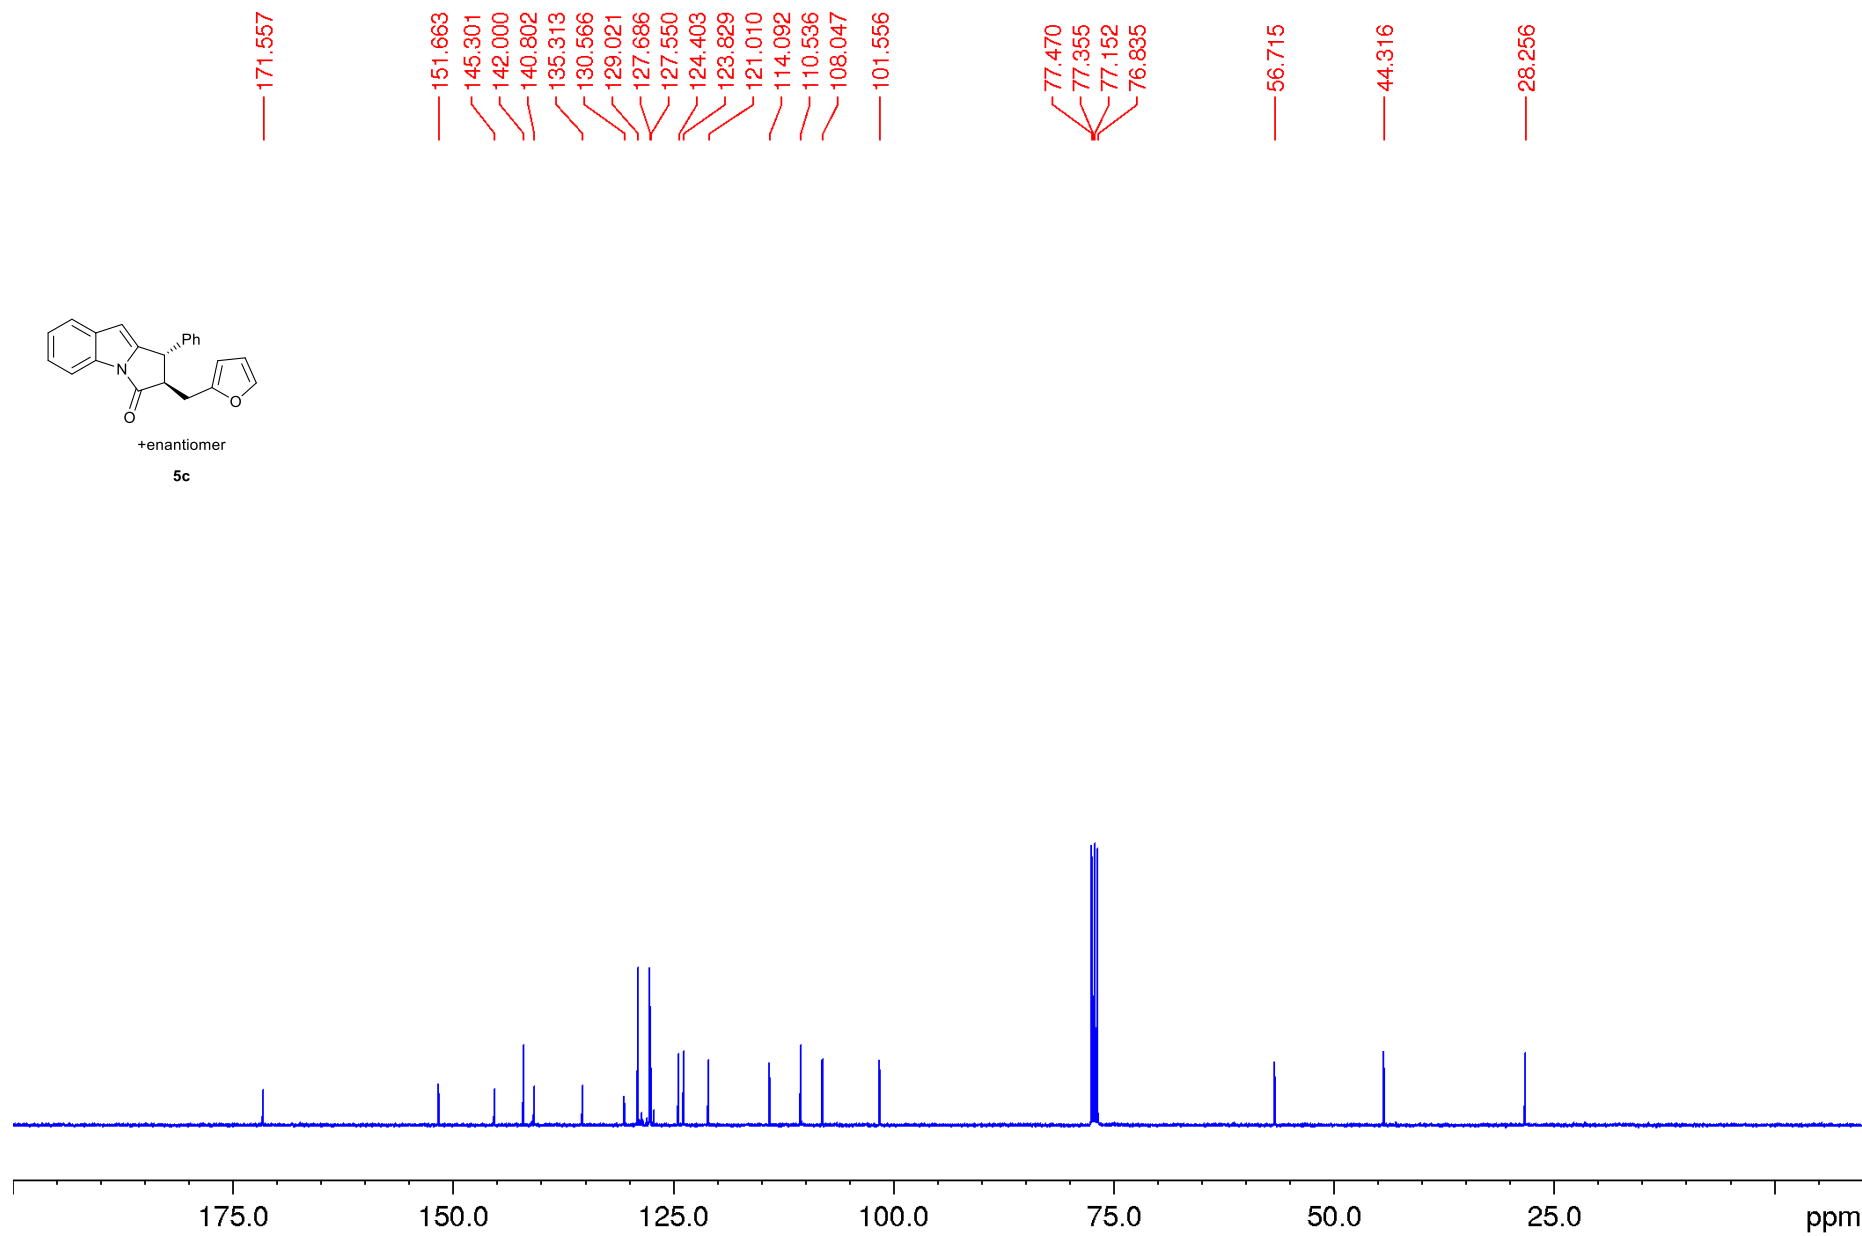

DEPT 135 NMR-spectrum ( $\text{CDCl}_3$ )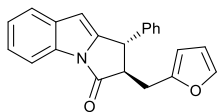

+enantiomer

**5c**

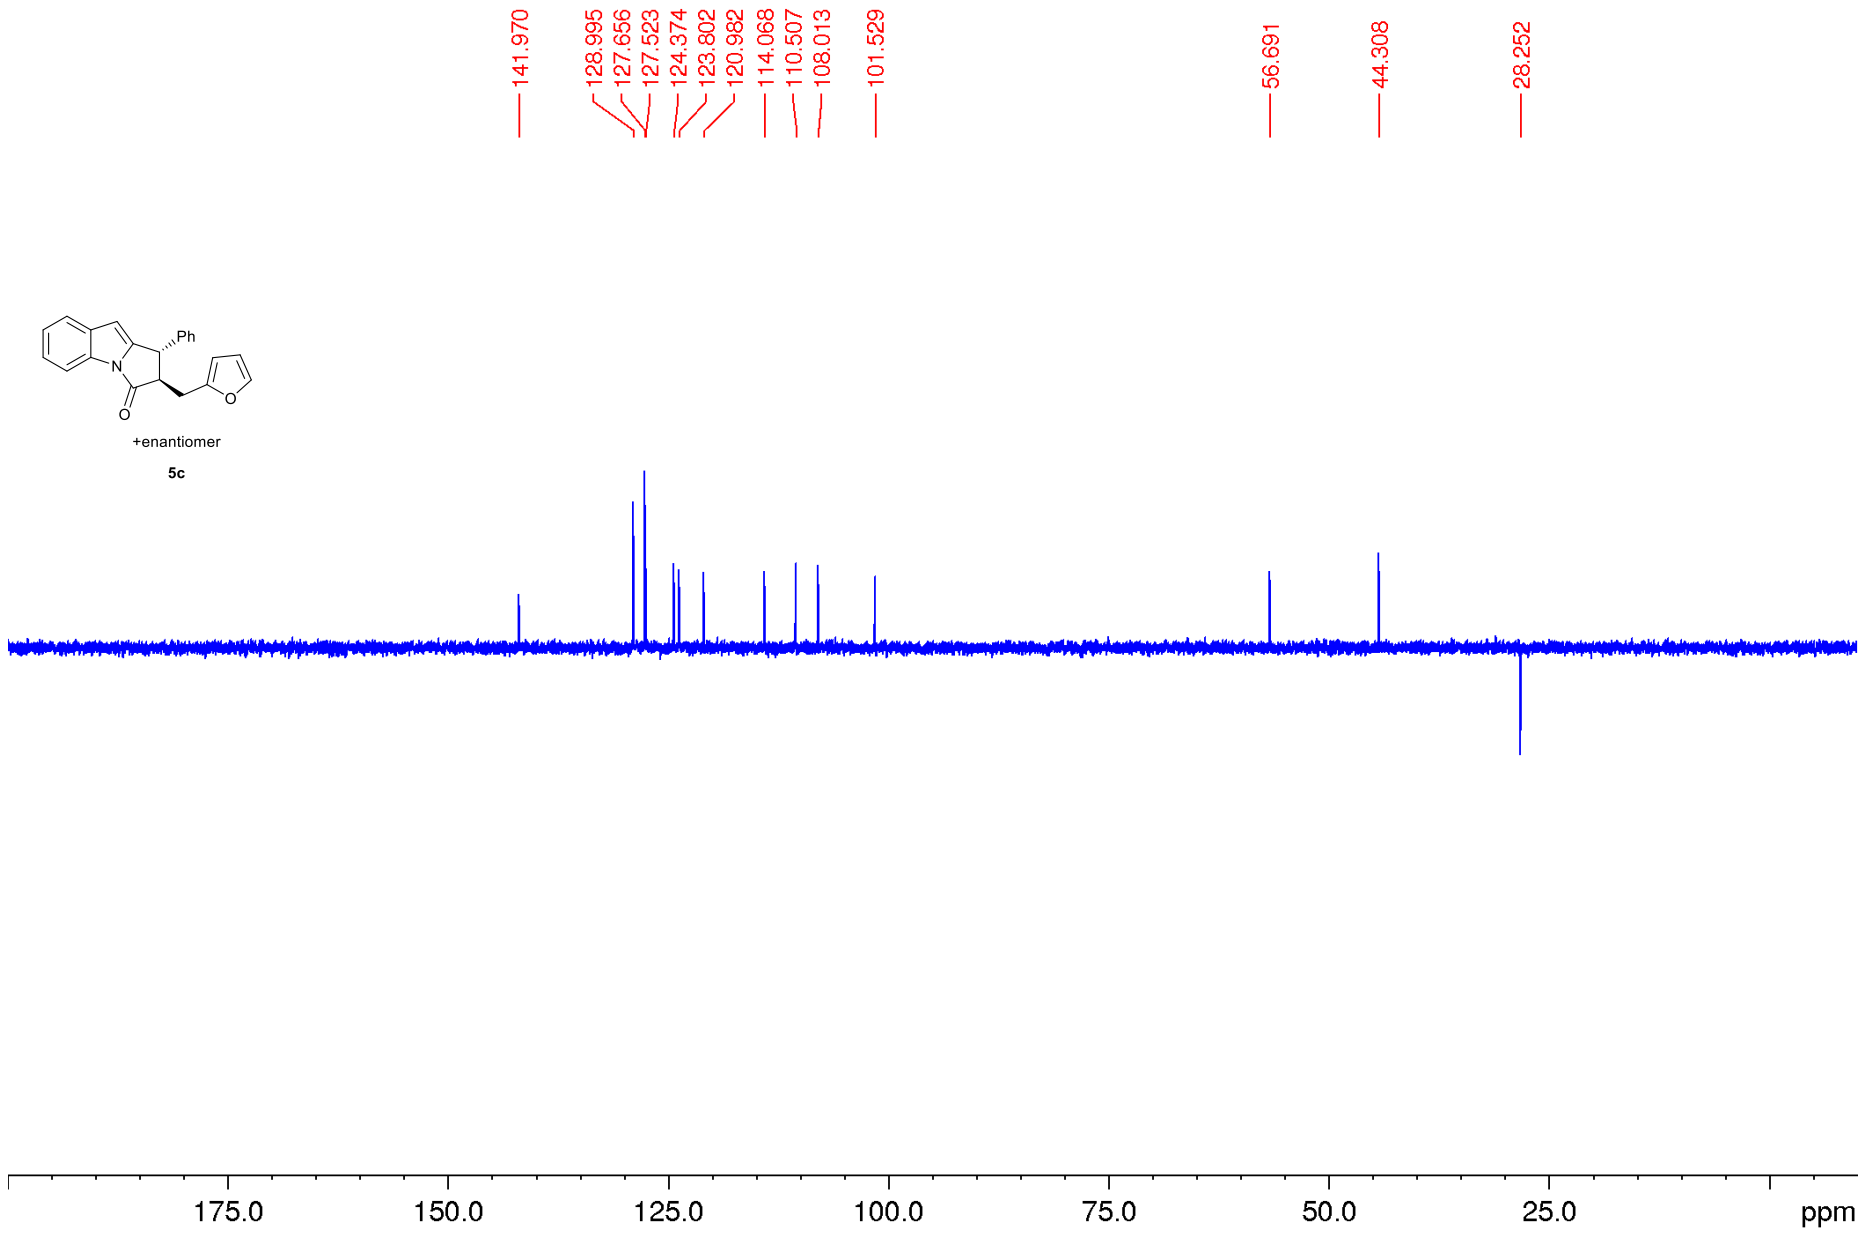



# $^1\text{H}$ NMR-spectrum (400 MHz, $\text{CDCl}_3$ )

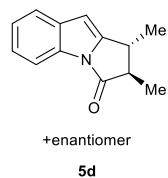

8.052  
8.046  
8.039  
8.031  
8.029  
7.510  
7.508  
7.502  
7.495  
7.489  
7.287  
7.274  
7.268  
7.259  
7.251  
7.245  
7.231  
6.269  
6.267

3.079  
3.075  
3.061  
3.048  
3.044  
2.760  
2.756  
2.742  
2.738  
2.724  
2.719  
1.590  
1.479  
1.461  
1.457  
1.439

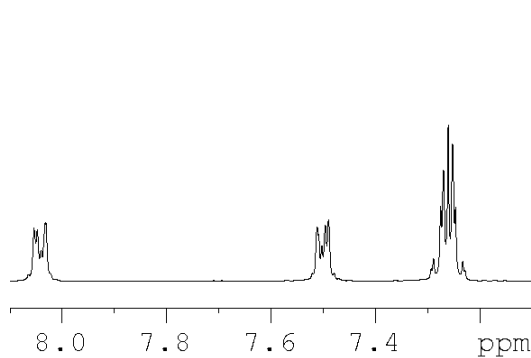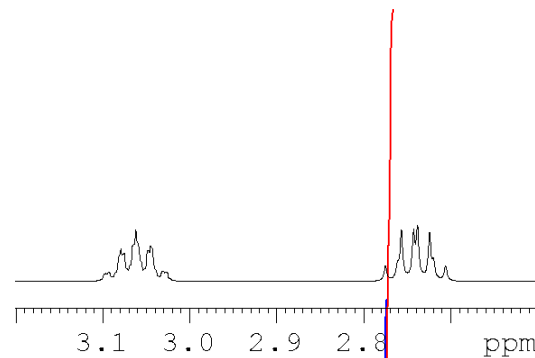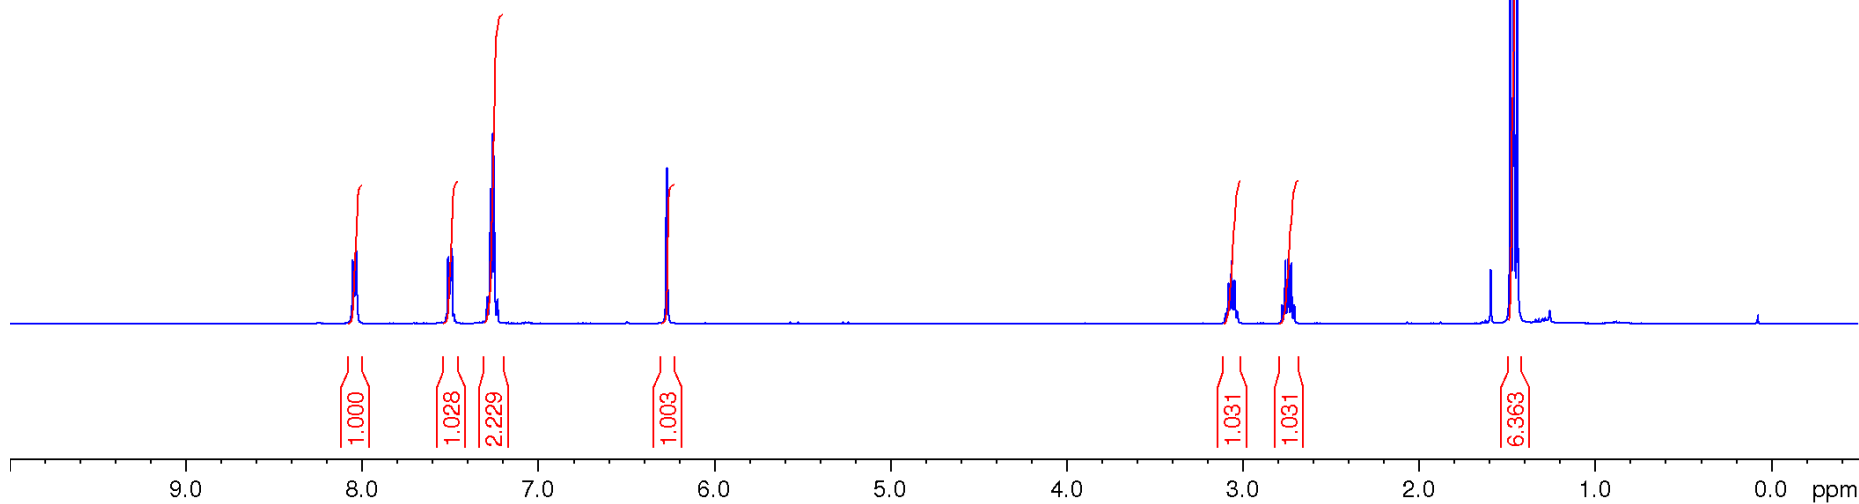

$^{13}\text{C}$  NMR-spectrum (100 MHz,  $\text{CDCl}_3$ )

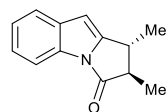

+enantiomer

**5d**

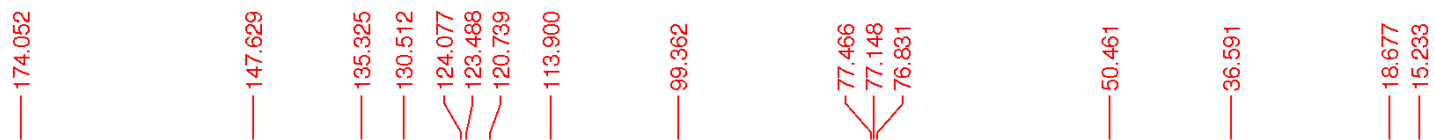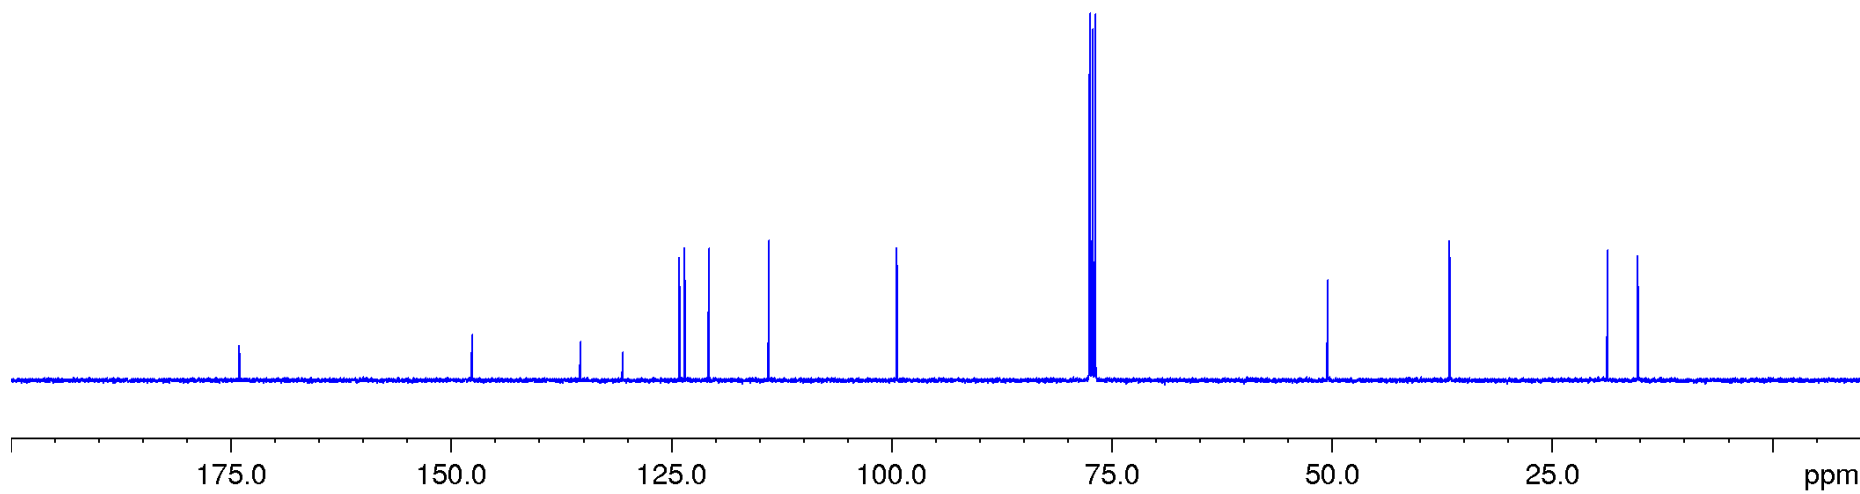

# DEPT 135 NMR-spectrum (CDCl<sub>3</sub>)

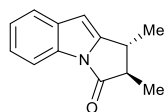

+enantiomer

**5d**

124.086  
123.490  
120.749  
113.900  
99.375  
50.460  
36.586  
18.671  
15.229

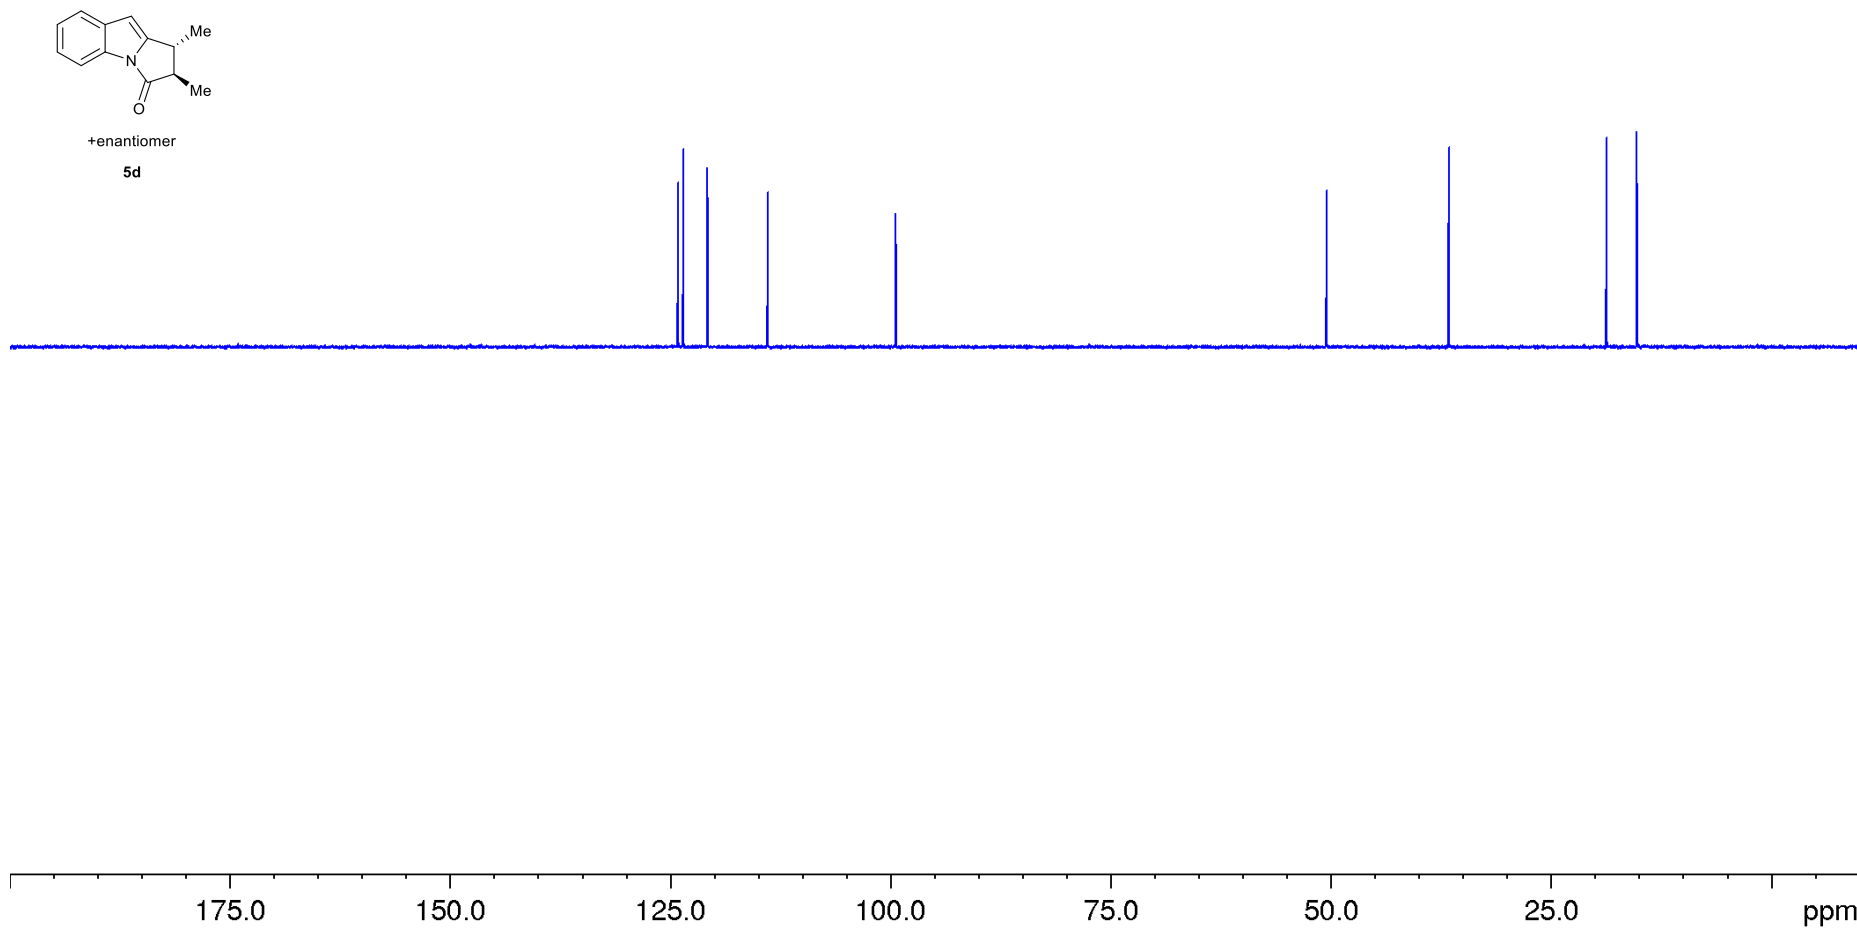

# $^1\text{H}$ NMR-spectrum (400 MHz, $\text{CDCl}_3$ )

8.064  
8.057  
8.043  
8.041  
7.517  
7.514  
7.507  
7.503  
7.501  
7.495  
7.280  
7.275  
7.266  
7.260  
7.257  
7.253  
6.285

3.634  
3.631  
3.613  
3.595  
3.577  
3.558  
3.555  
3.350  
3.330  
3.311  
3.290  
3.271

1.568  
1.344  
1.330  
1.325  
1.312

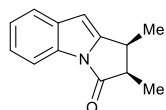

+enantiomer

5'd

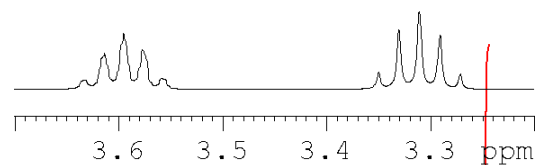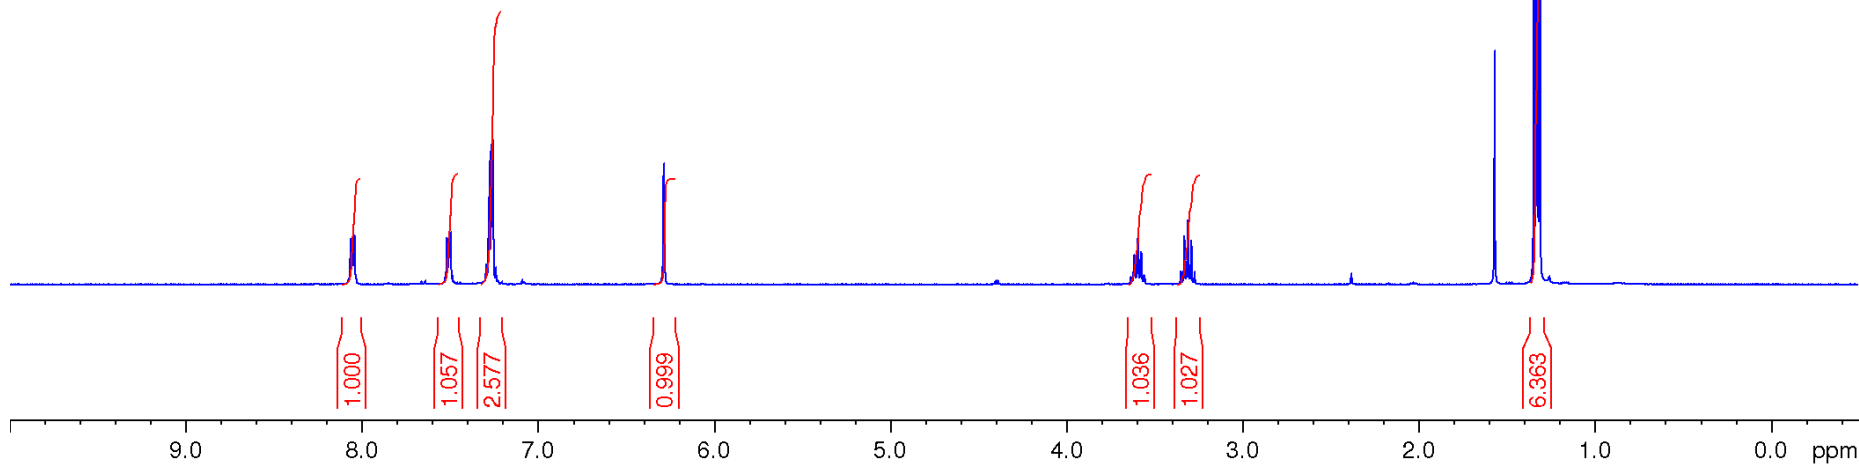

$^{13}\text{C}$  NMR-spectrum (100 MHz,  $\text{CDCl}_3$ )

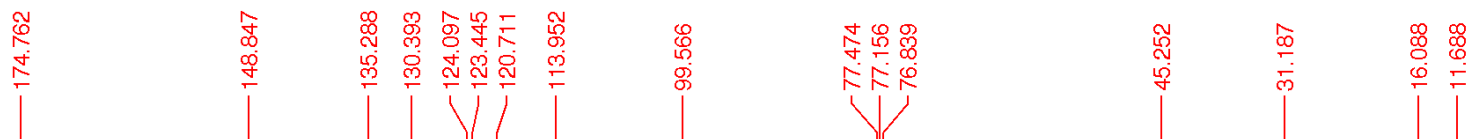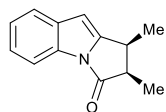

+enantiomer

5'd

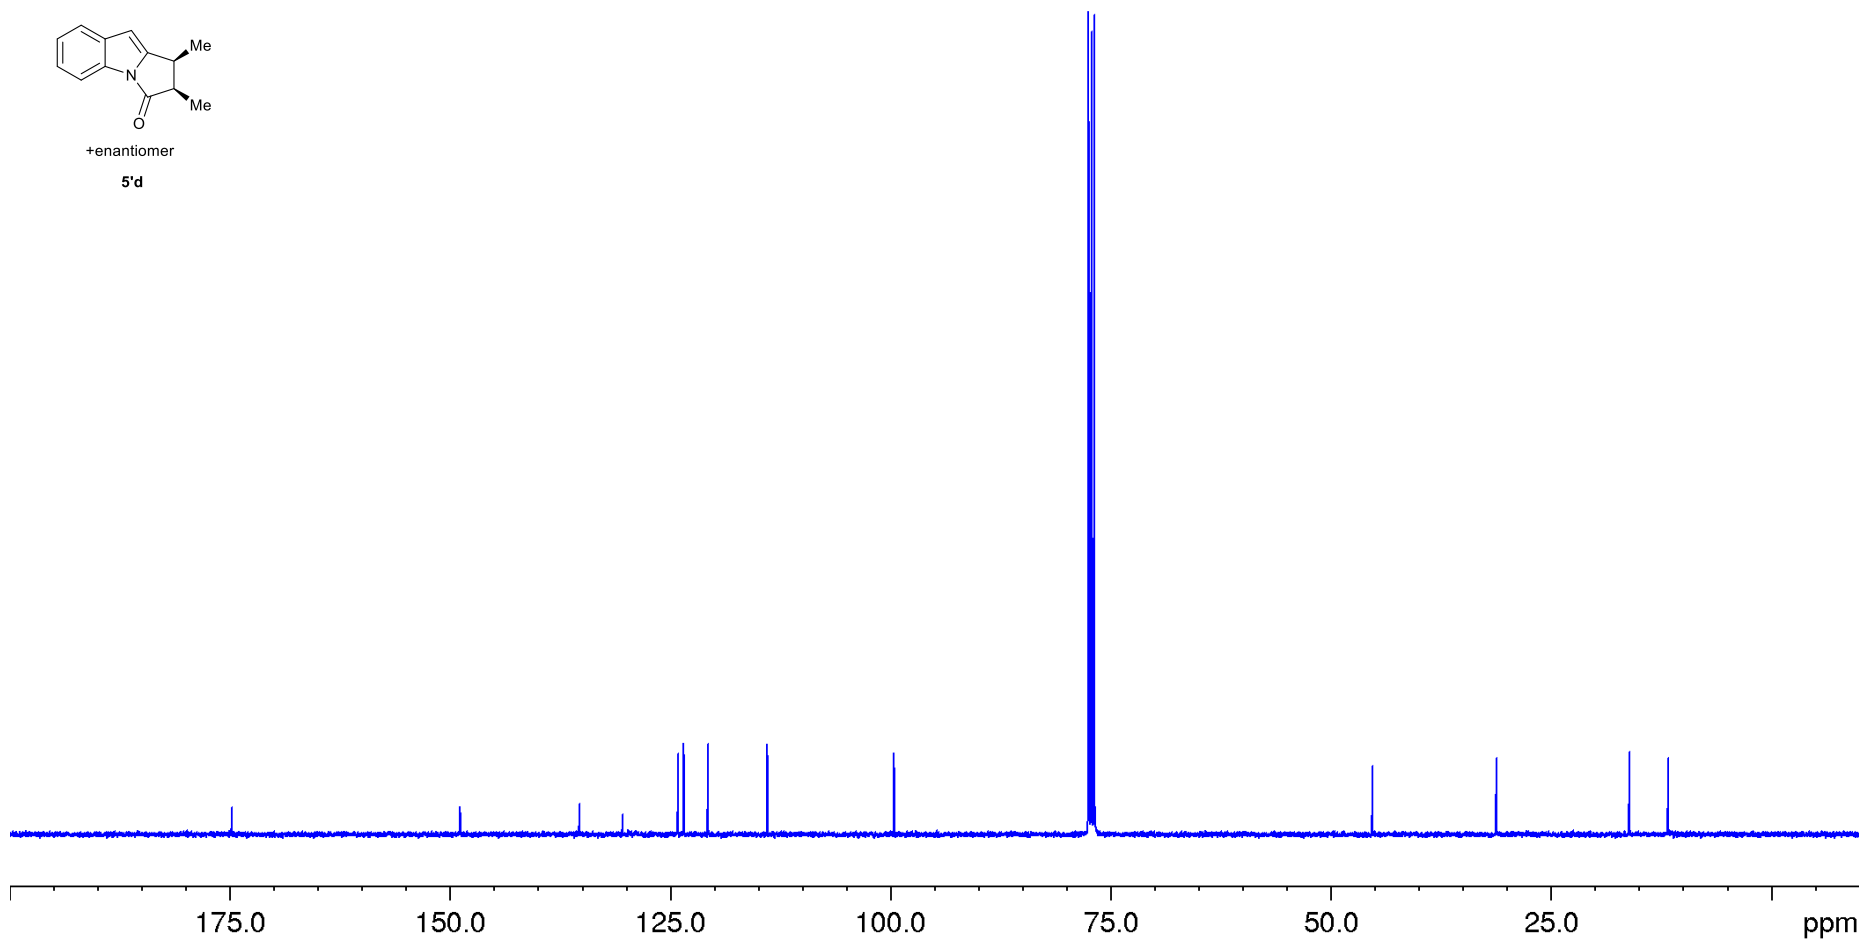

$^1\text{H}$  NMR-spectrum (400 MHz,  $\text{CDCl}_3$ )

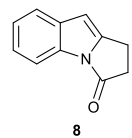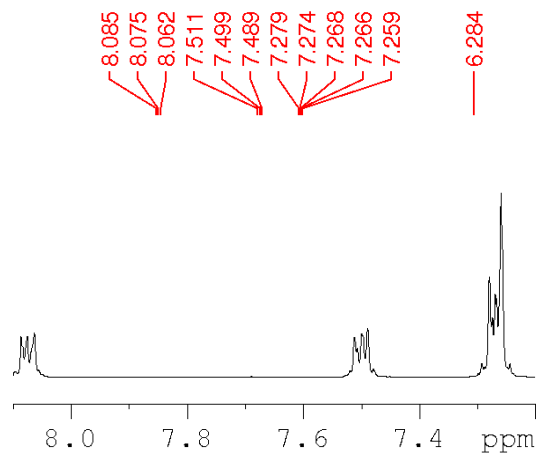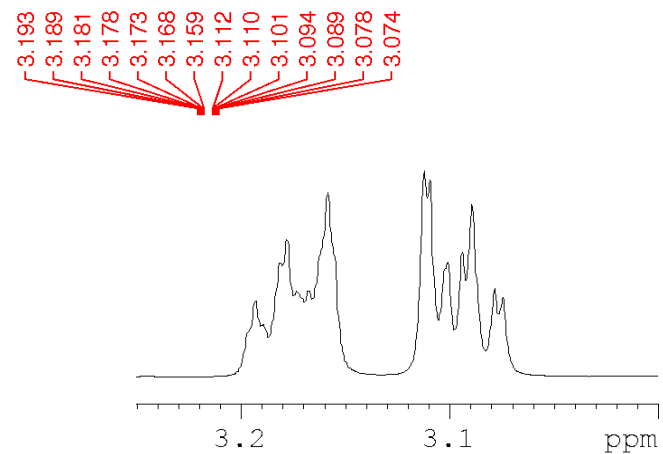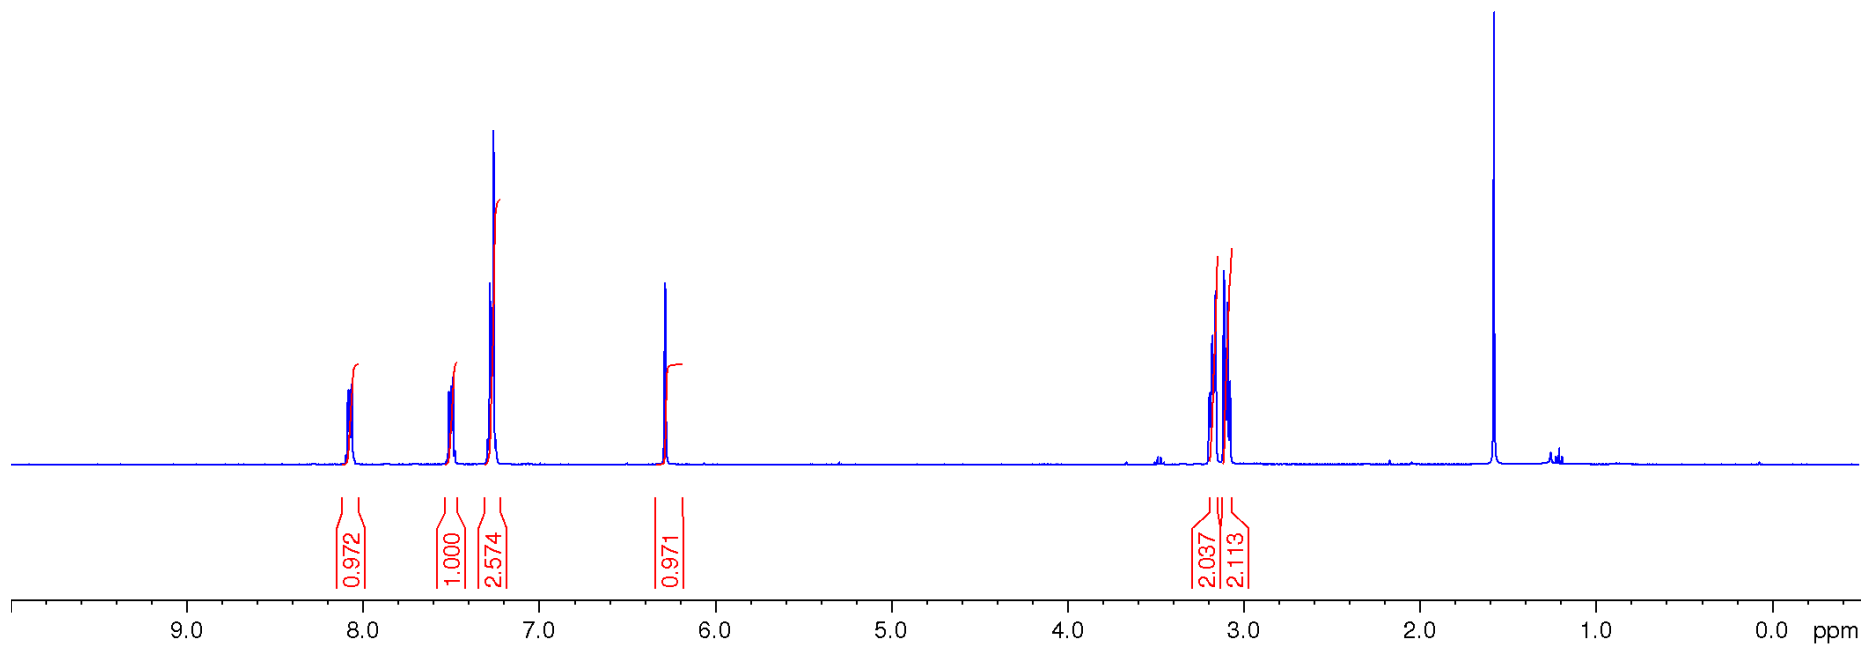

$^{13}\text{C}$  NMR-spectrum (100 MHz,  $\text{CDCl}_3$ )

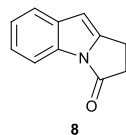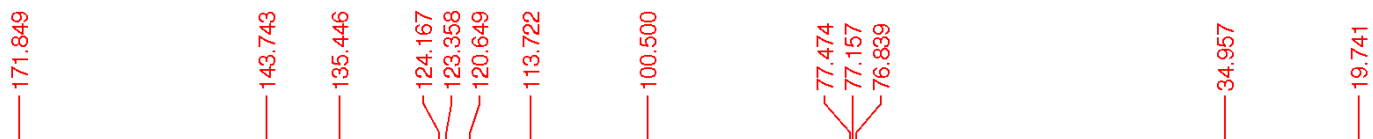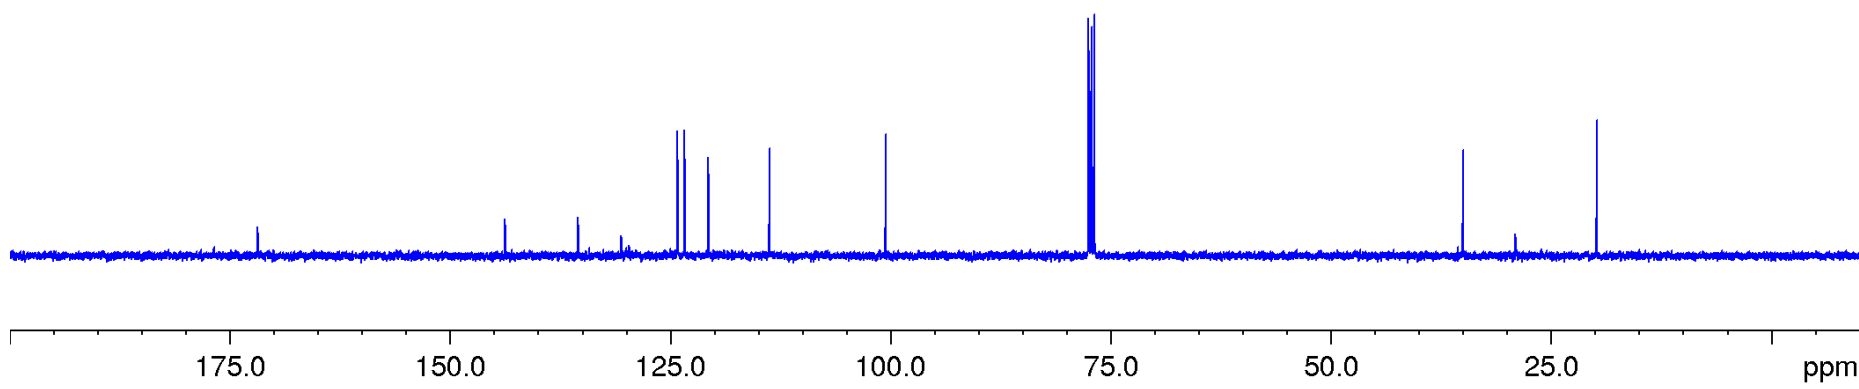

# DEPT 135 NMR-spectrum ( $\text{CDCl}_3$ )

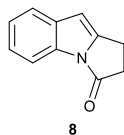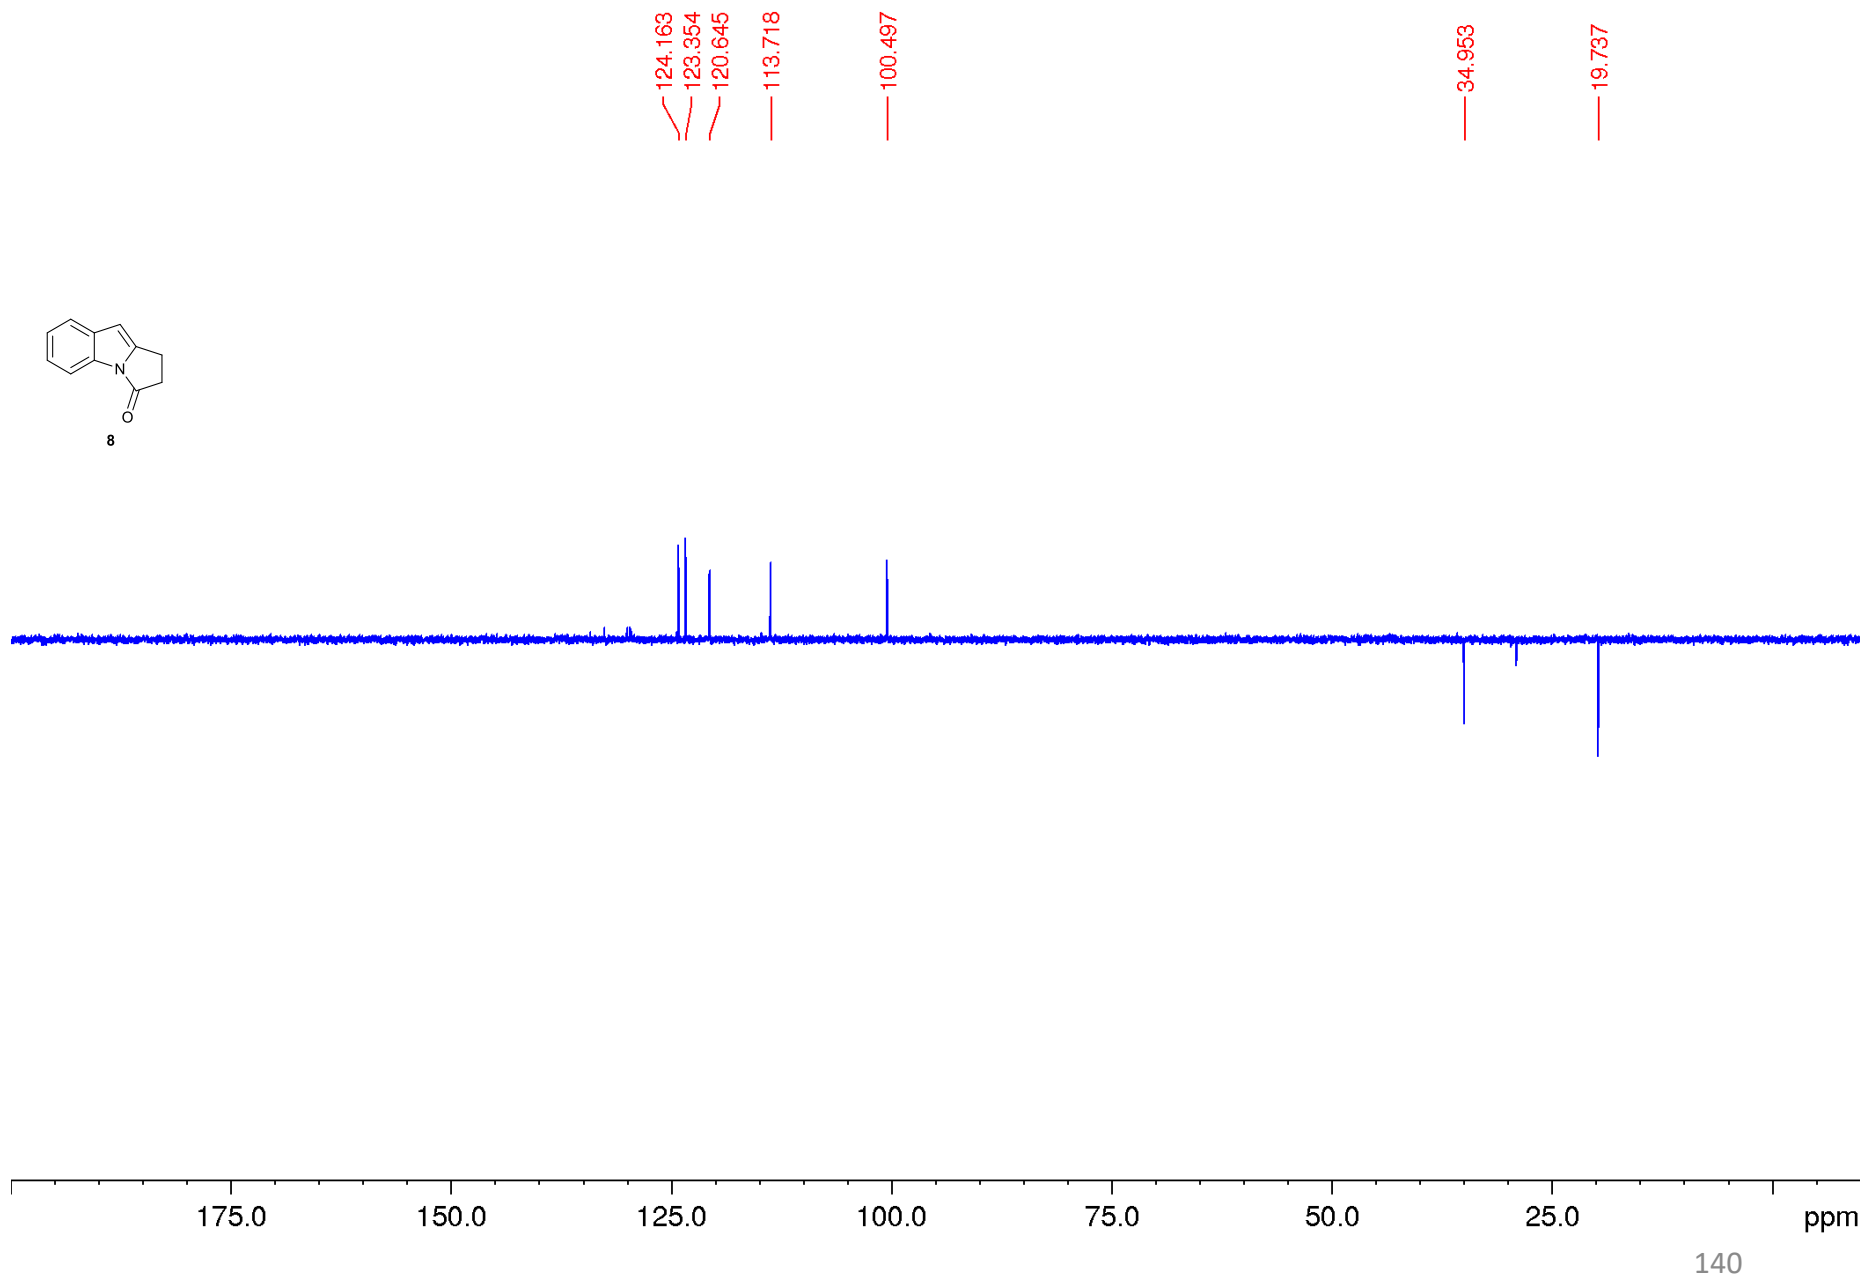



# <sup>1</sup>H NMR-spectrum (400 MHz, CDCl<sub>3</sub>)

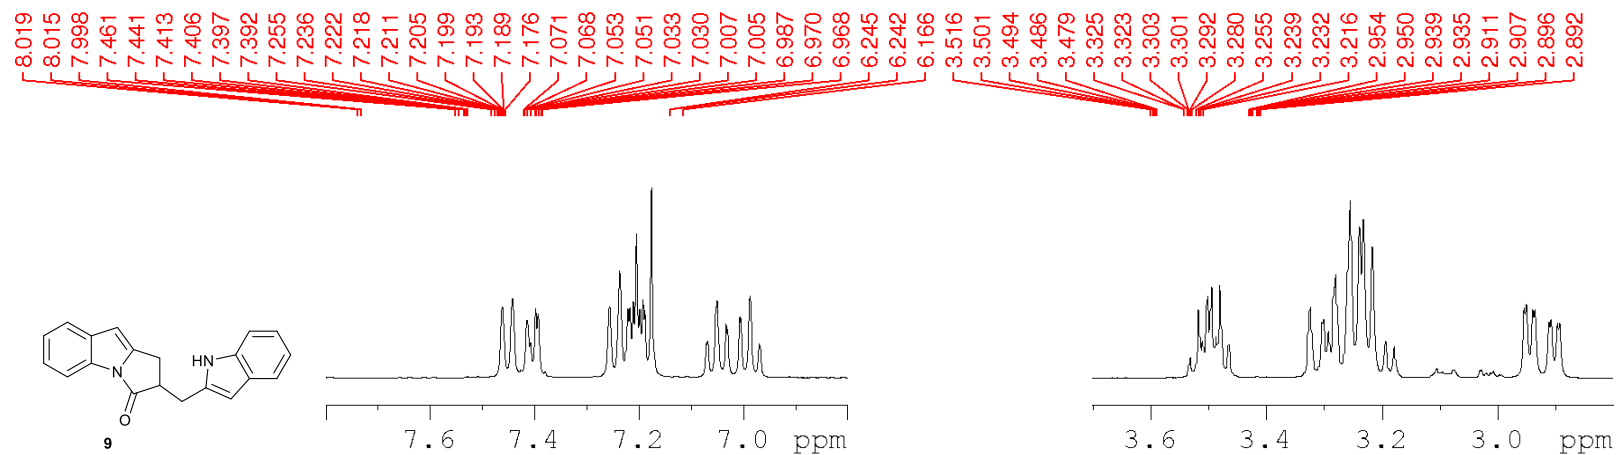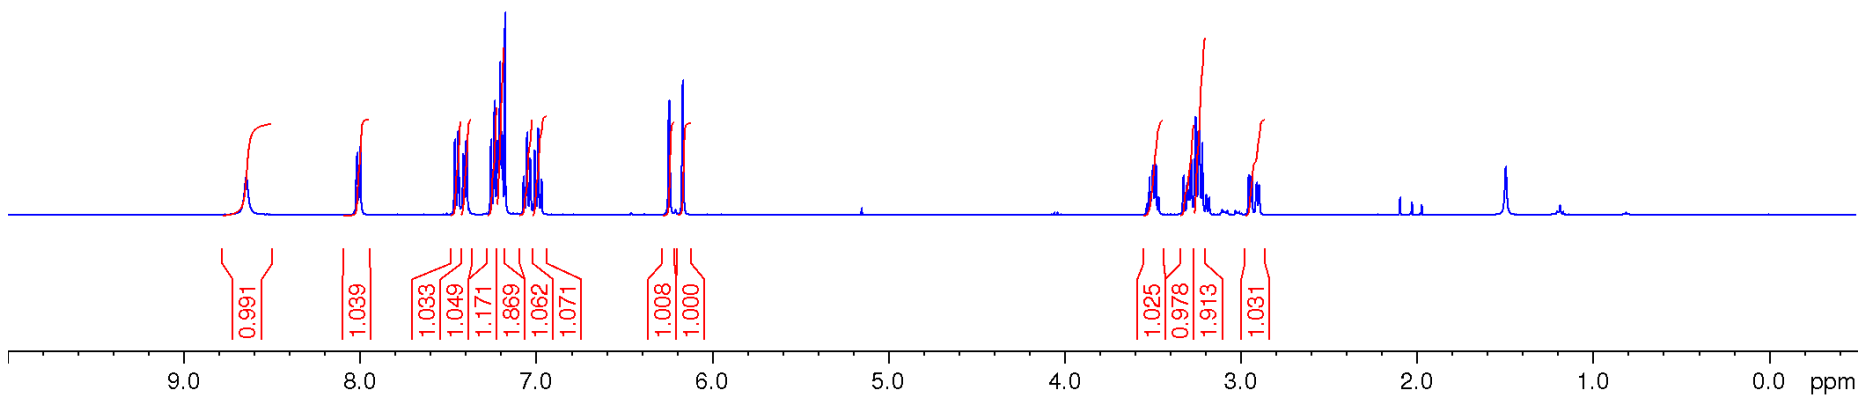

$^{13}\text{C}$  NMR-spectrum (100 MHz,  $\text{CDCl}_3$ )

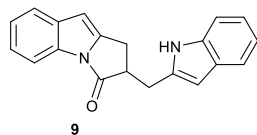

174.072

141.669

136.570

135.463

135.305

130.551

128.424

124.530

123.639

121.738

120.842

120.067

119.897

113.801

110.995

101.852

101.175

47.069

29.567

26.069

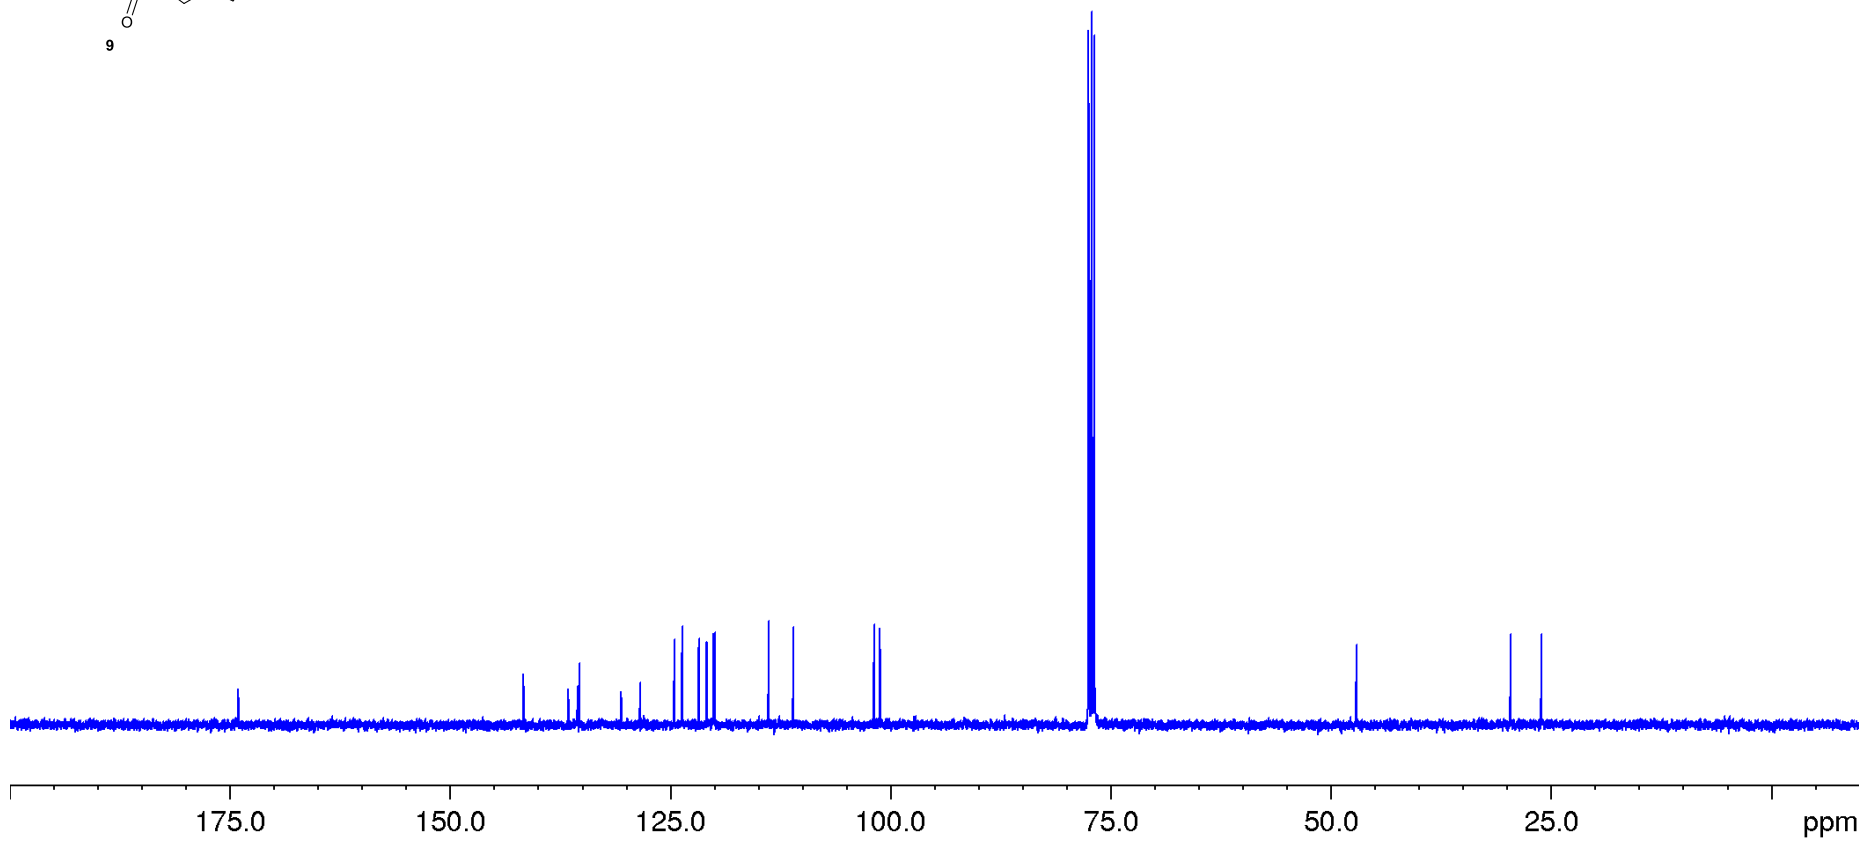

# DEPT 135 NMR-spectrum (CDCl<sub>3</sub>)

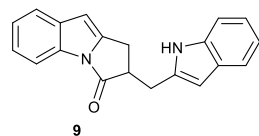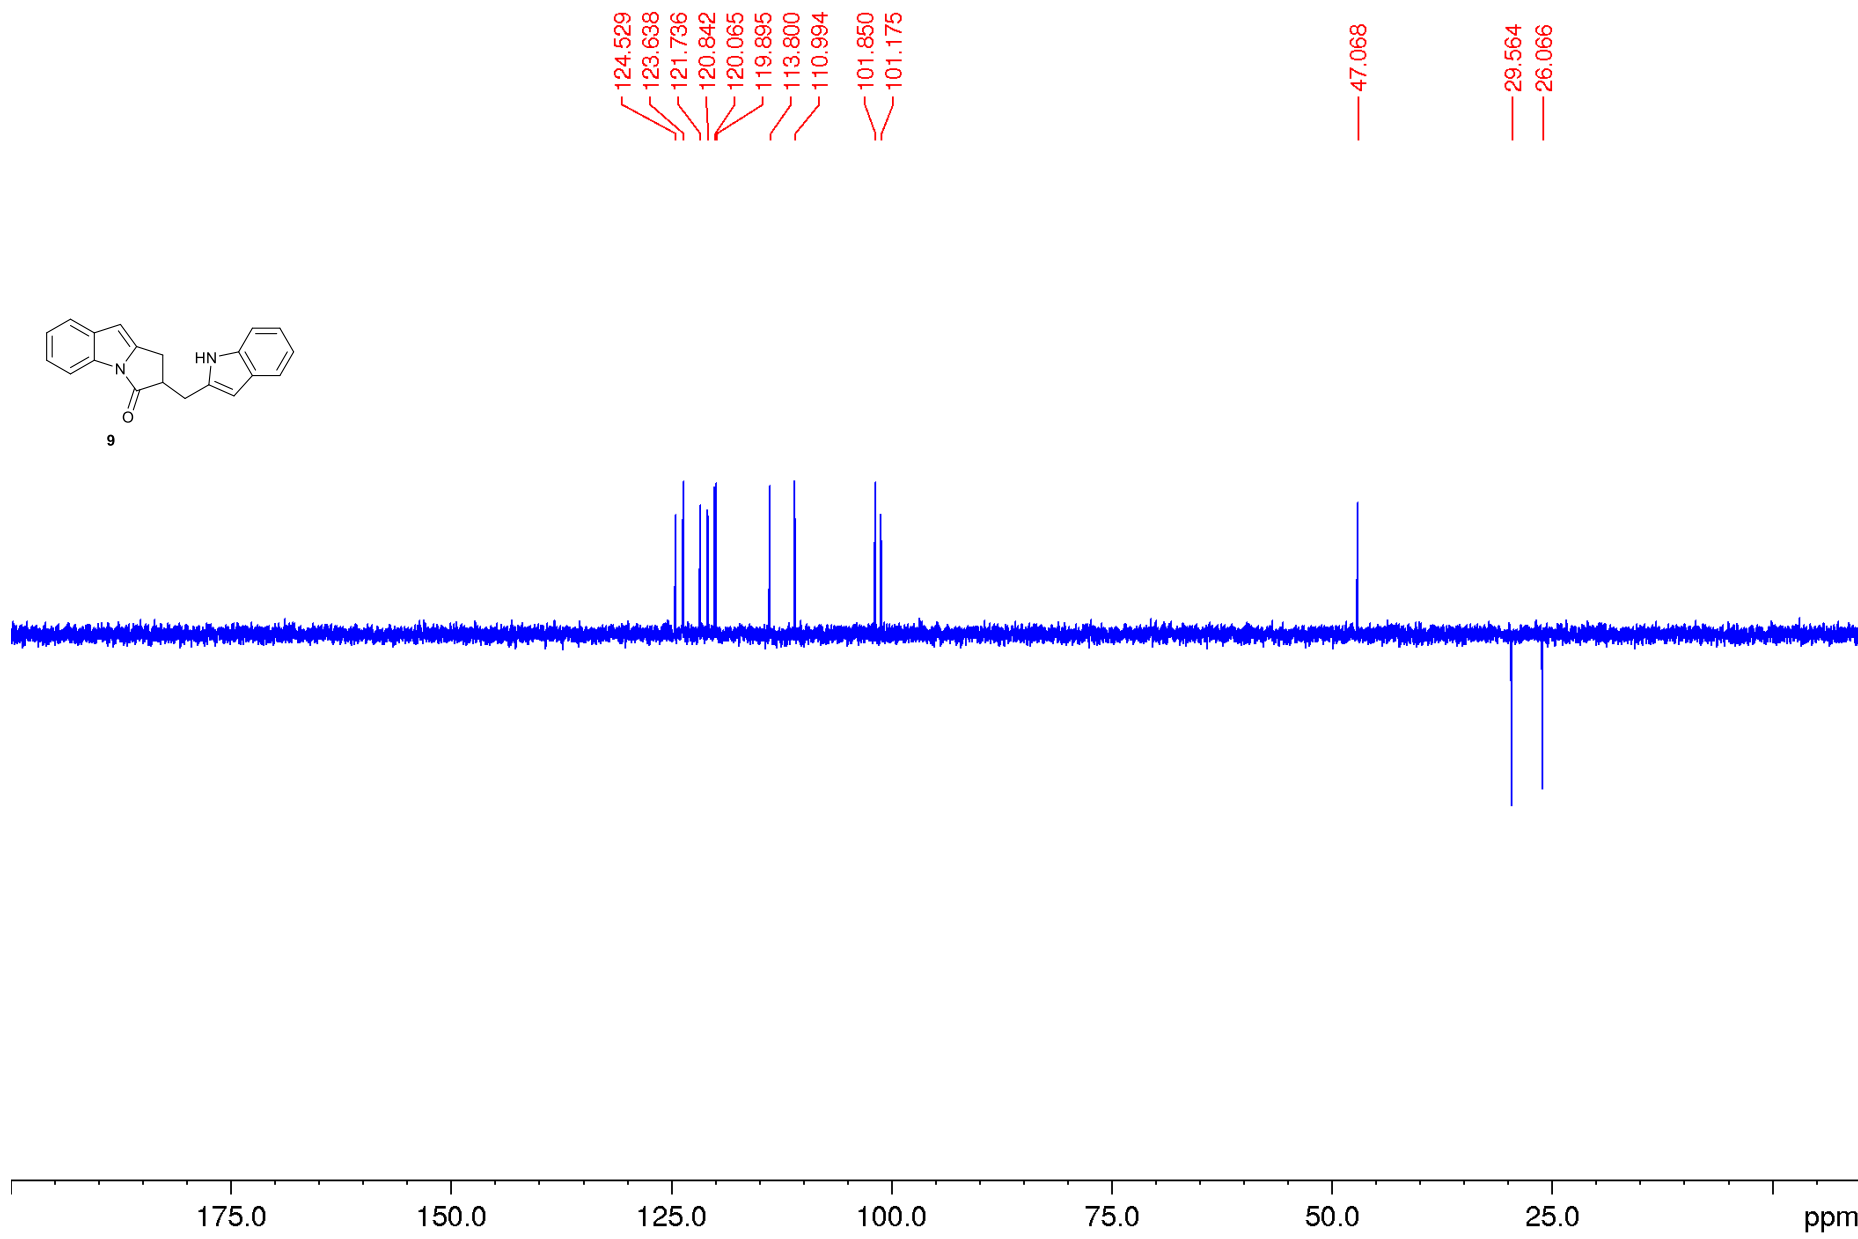

# <sup>1</sup>H NMR-spectrum (400 MHz, CDCl<sub>3</sub>)

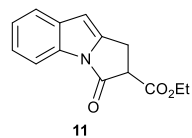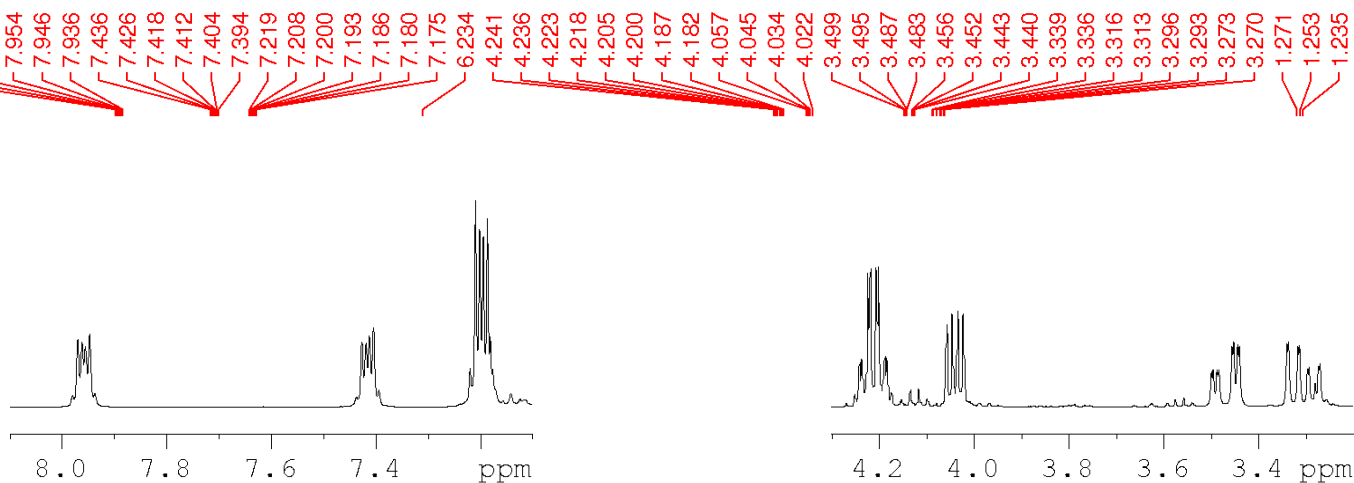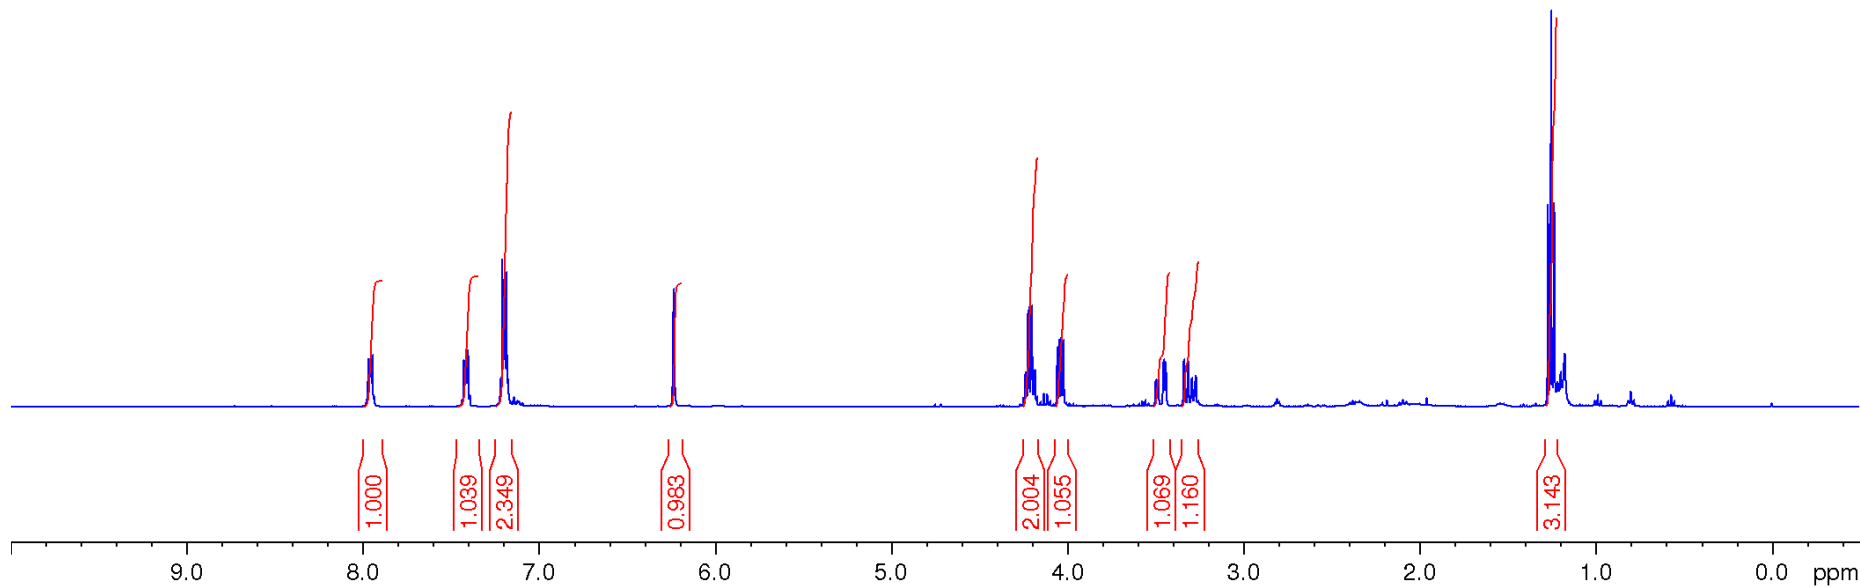

<sup>13</sup>C NMR-spectrum (100 MHz, CDCl<sub>3</sub>)

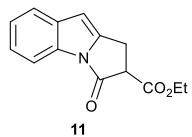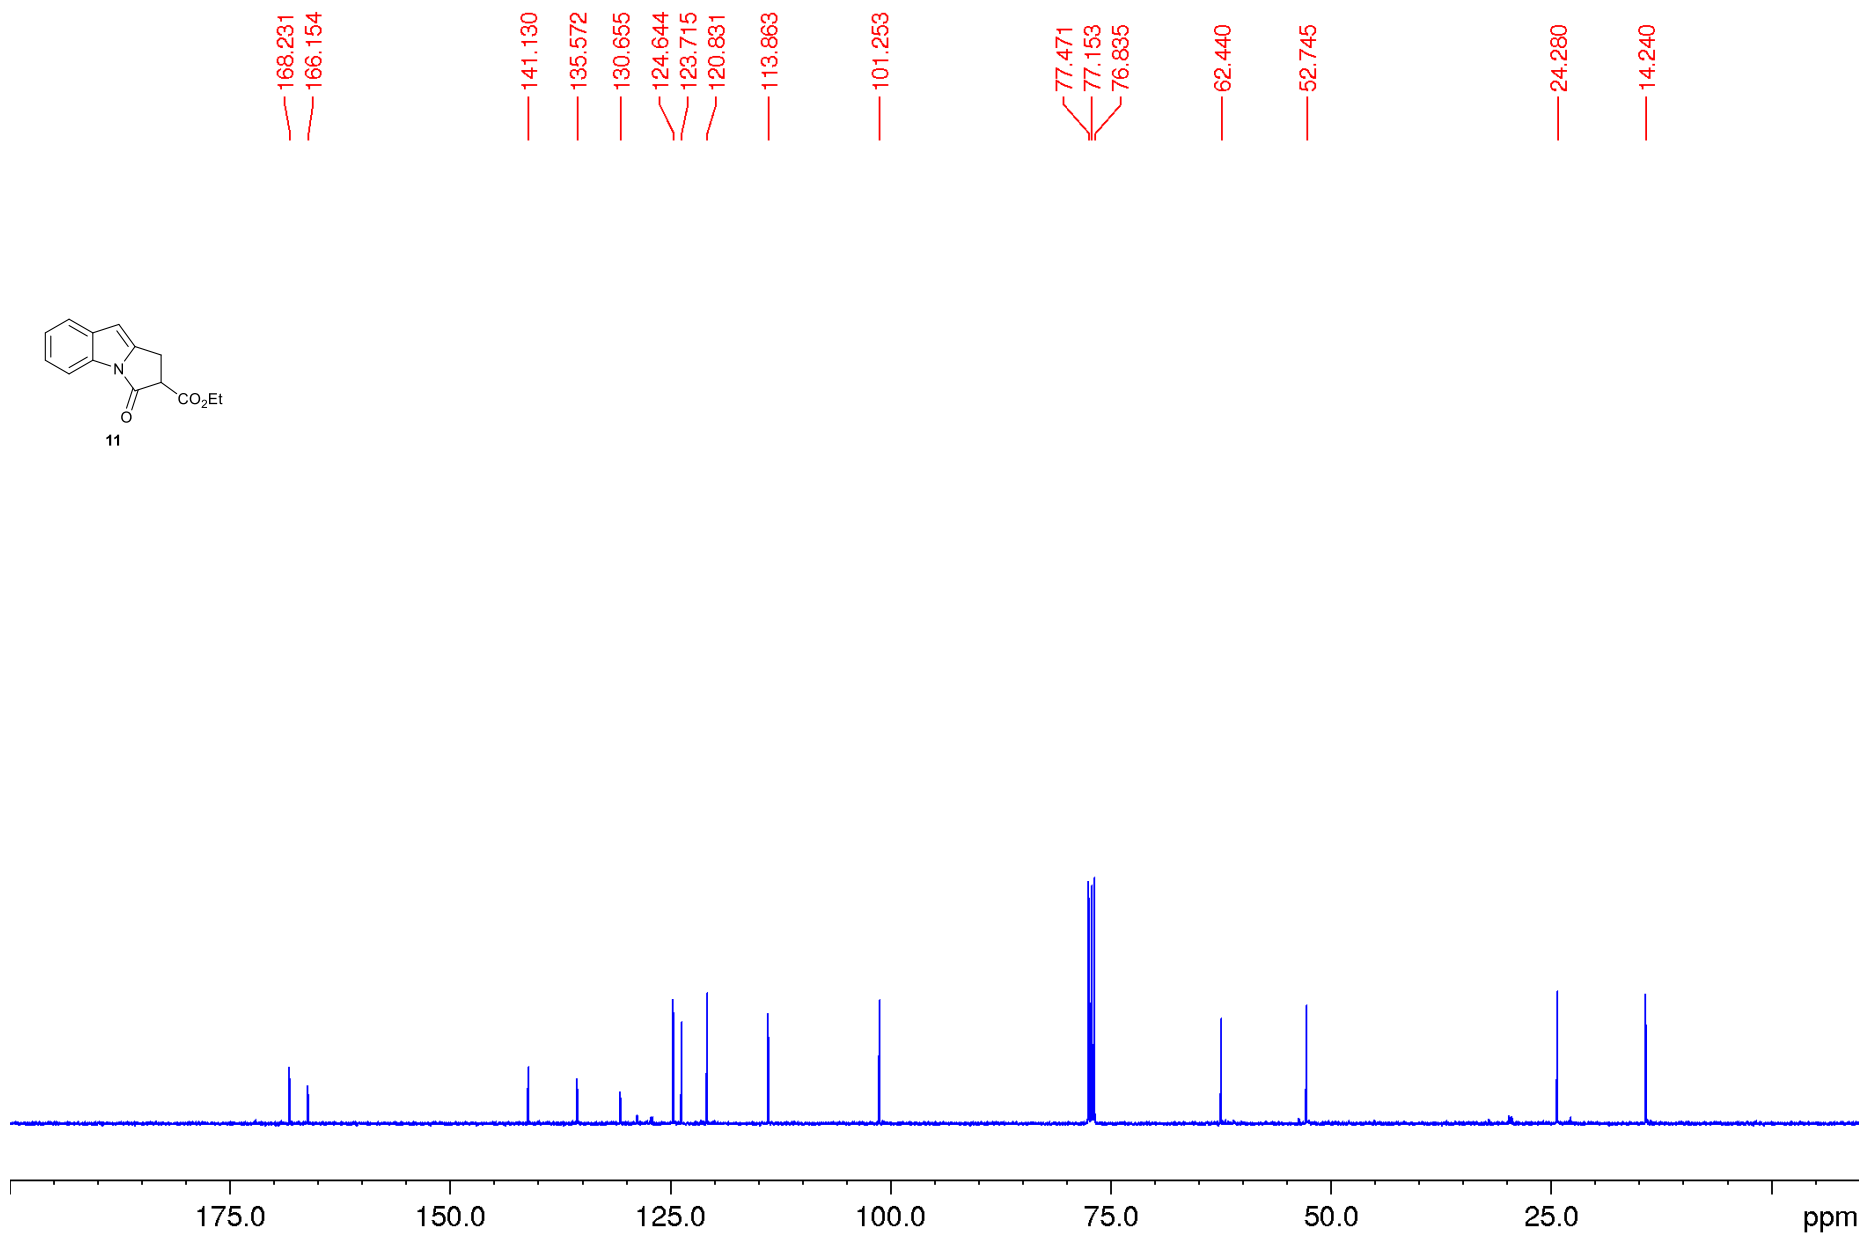

# DEPT 135 NMR-spectrum (CDCl<sub>3</sub>)

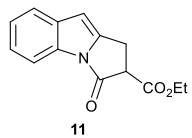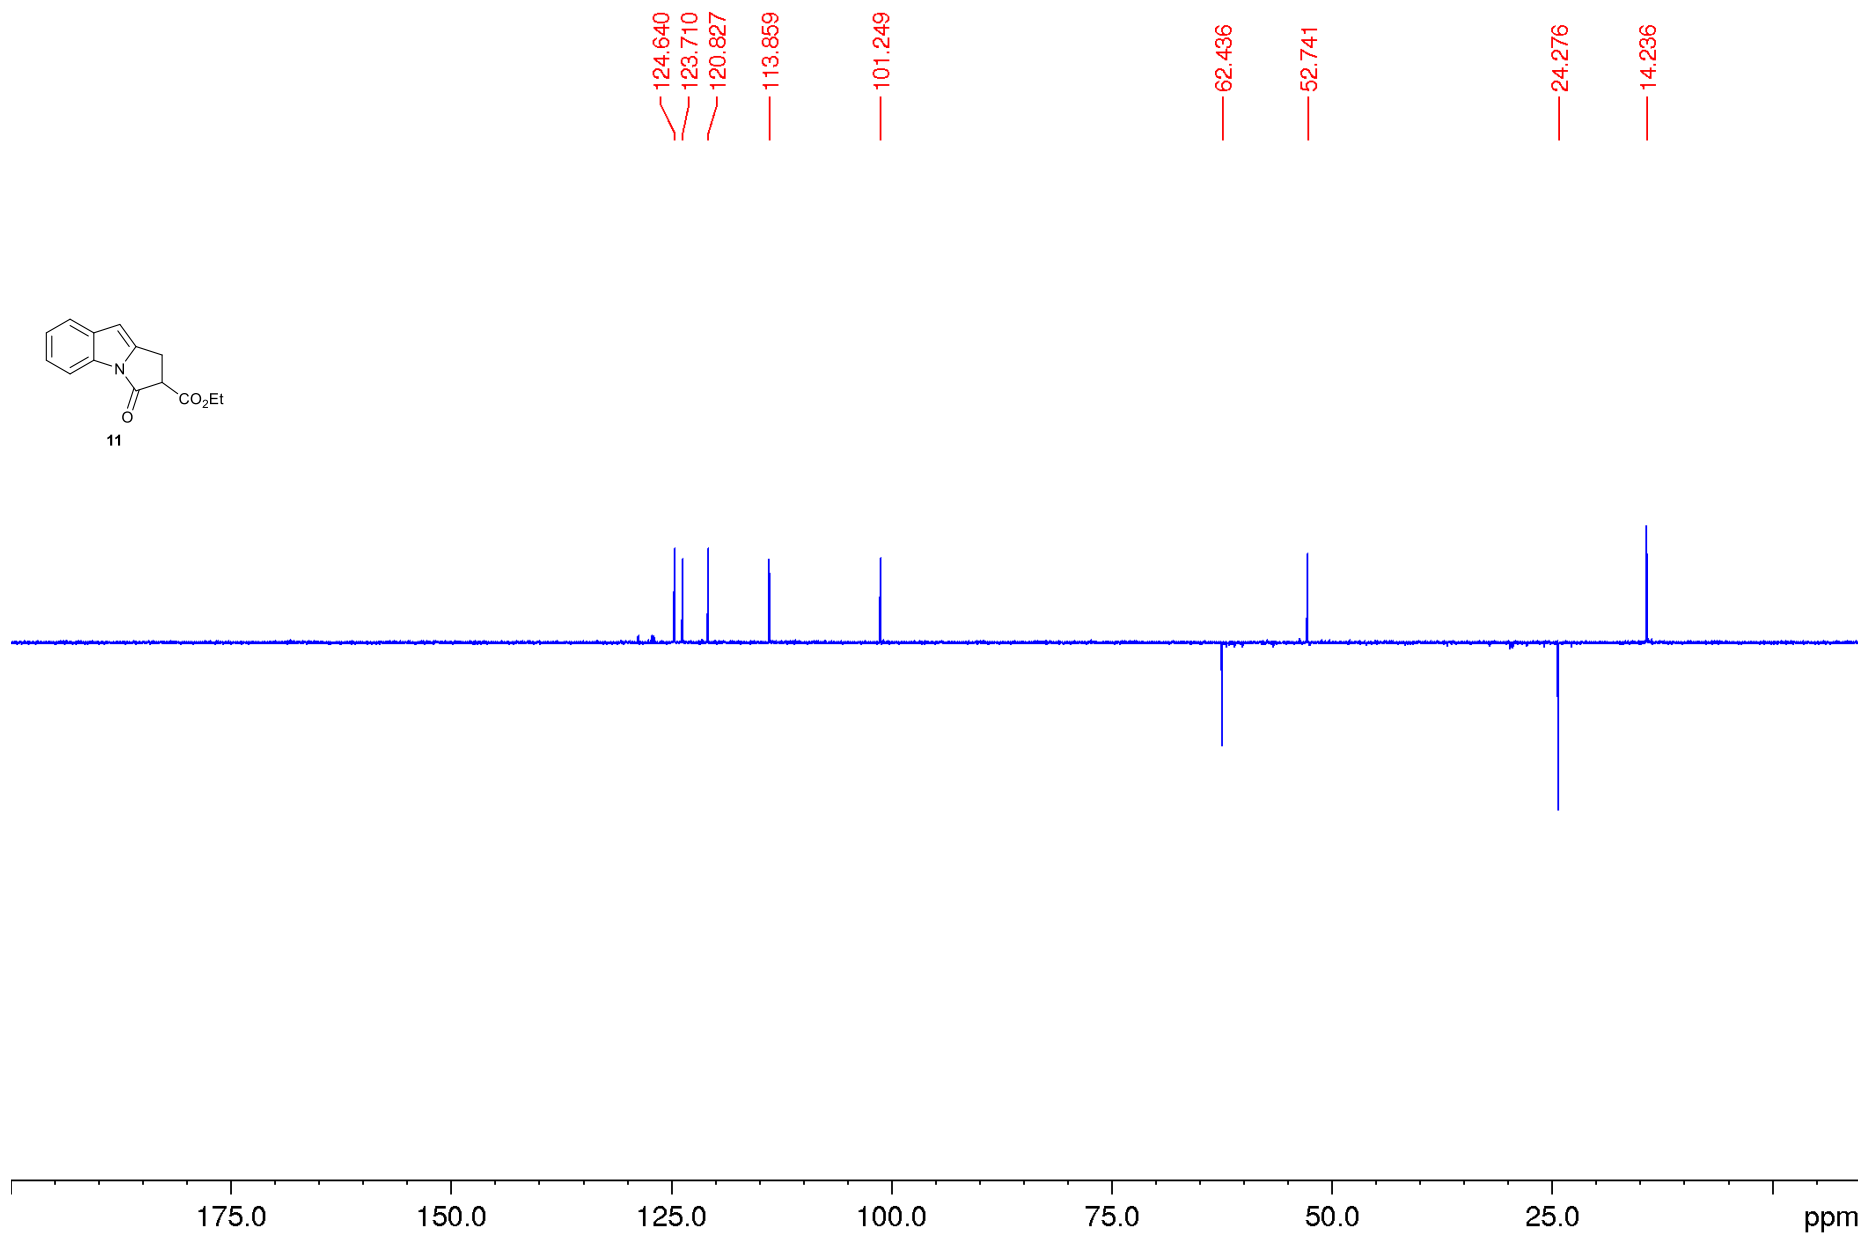

# $^1\text{H}$ NMR-spectrum (400 MHz, $\text{CDCl}_3$ )

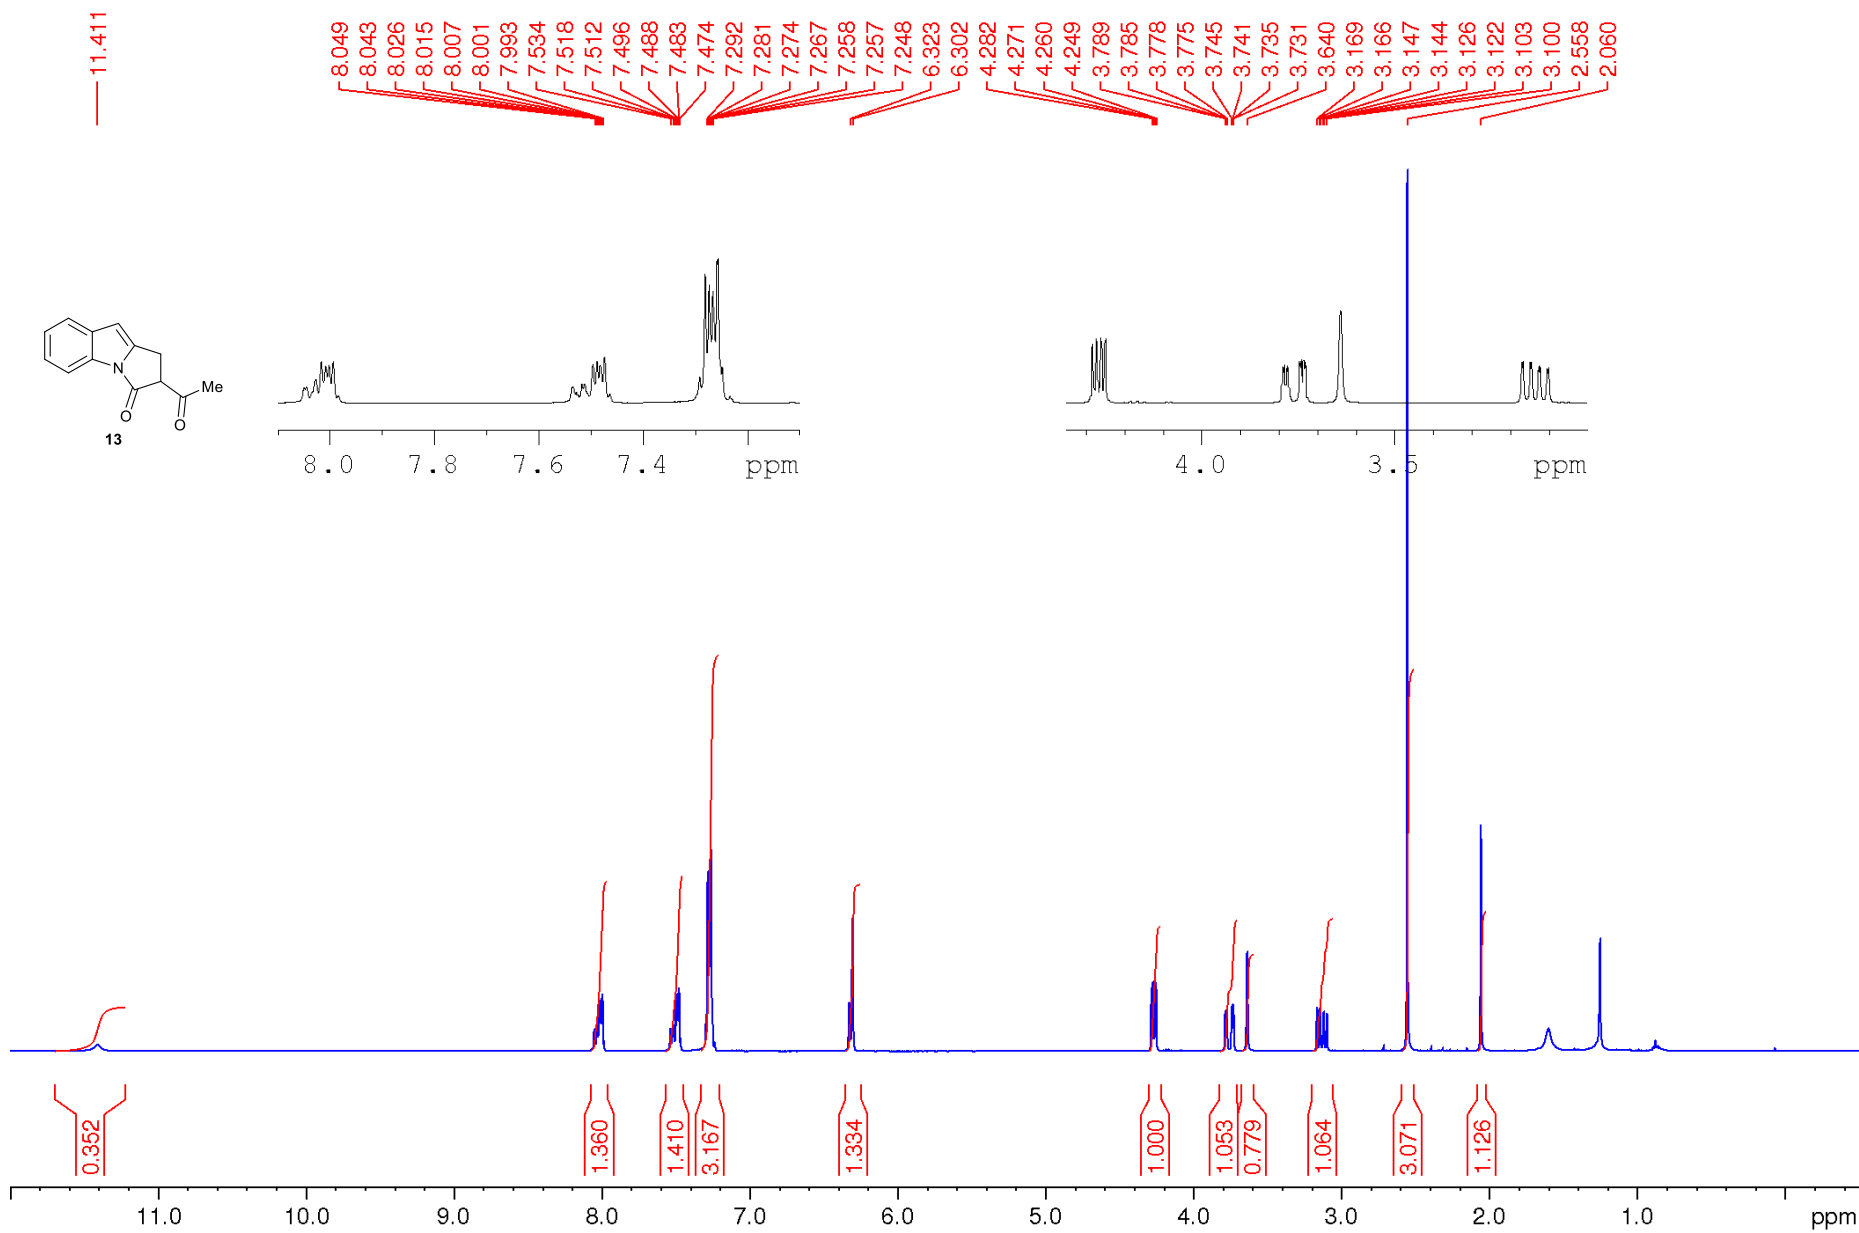

$^{13}\text{C}$  NMR-spectrum (100 MHz,  $\text{CDCl}_3$ )

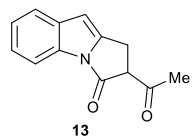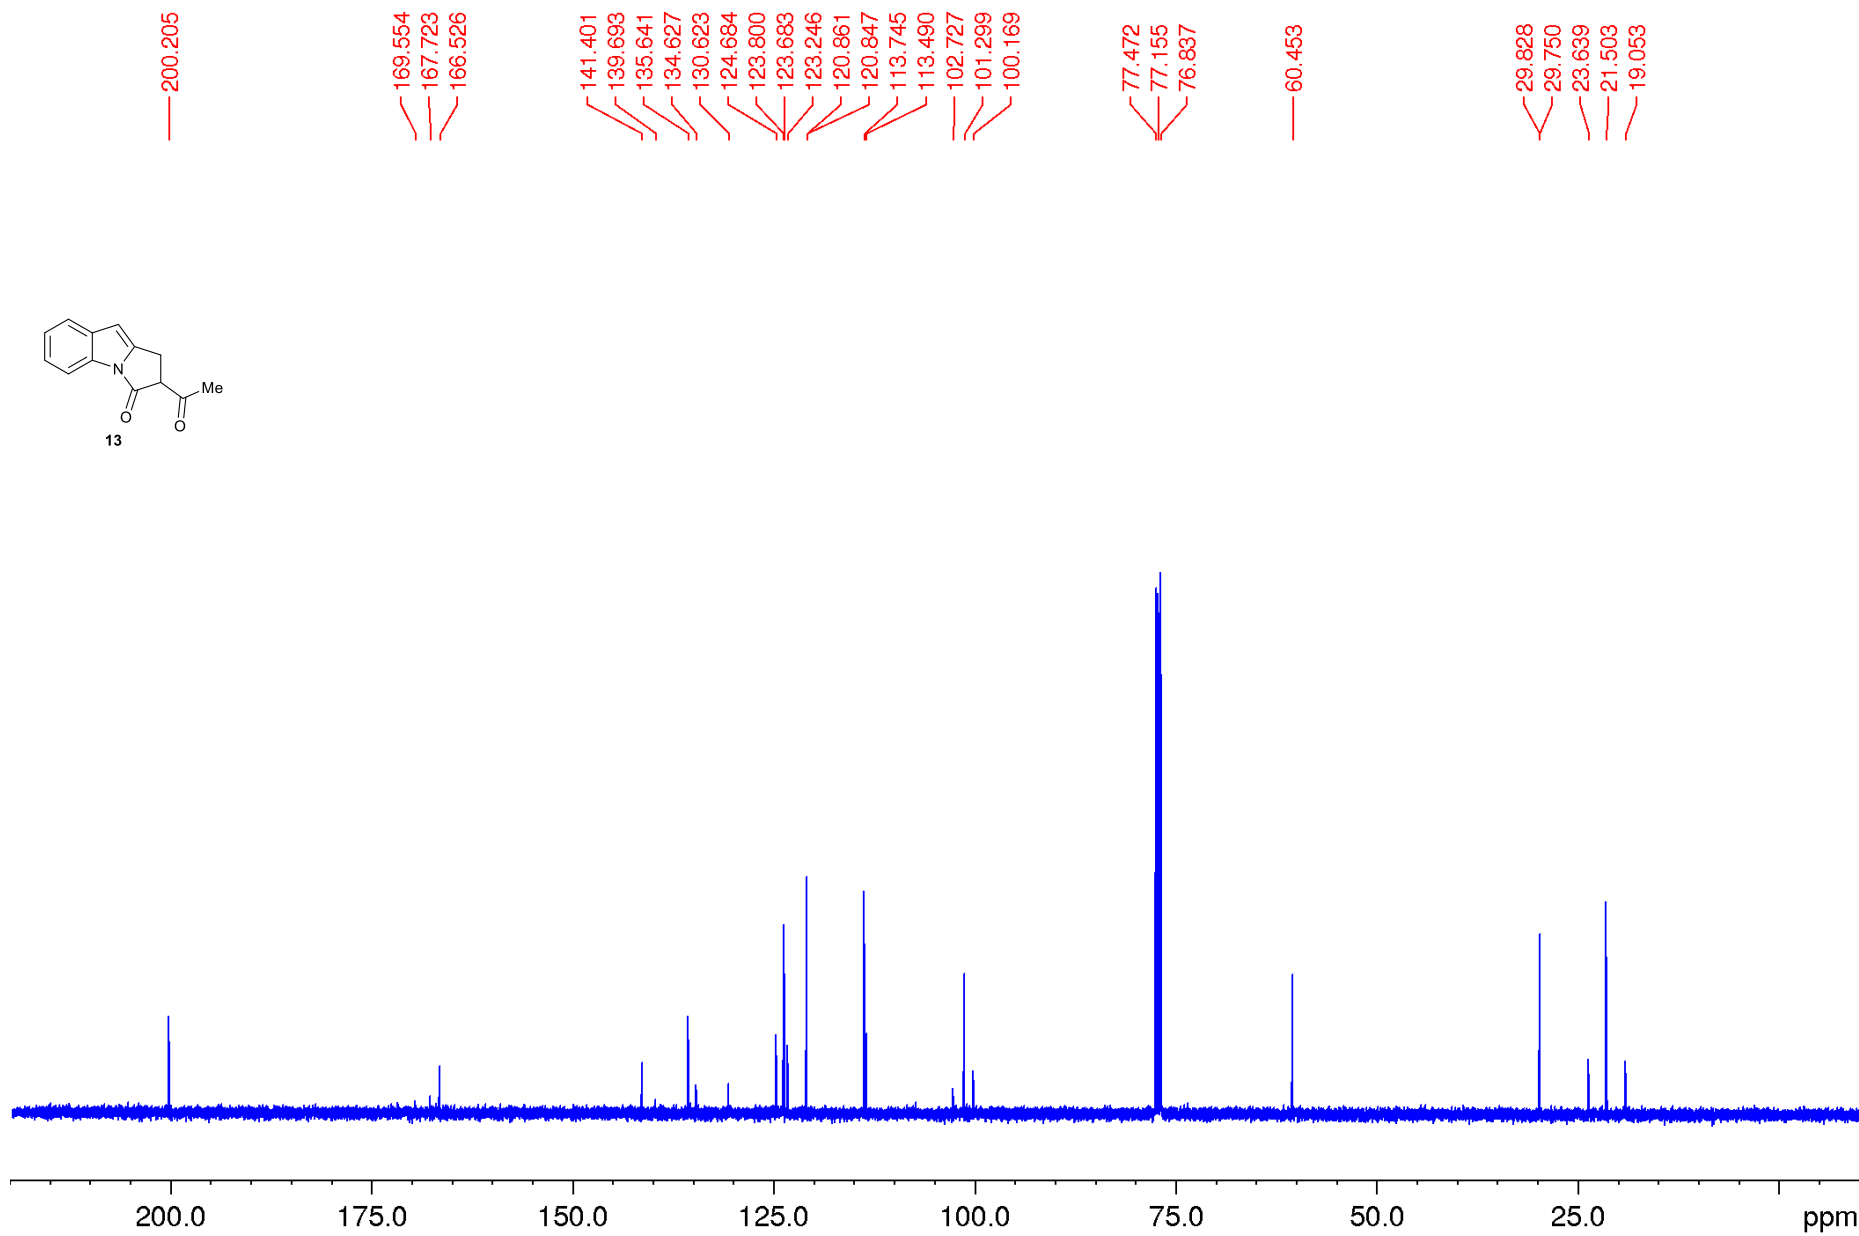



DEPT 135 NMR-spectrum (CDCl<sub>3</sub>)

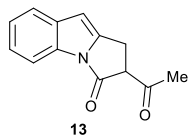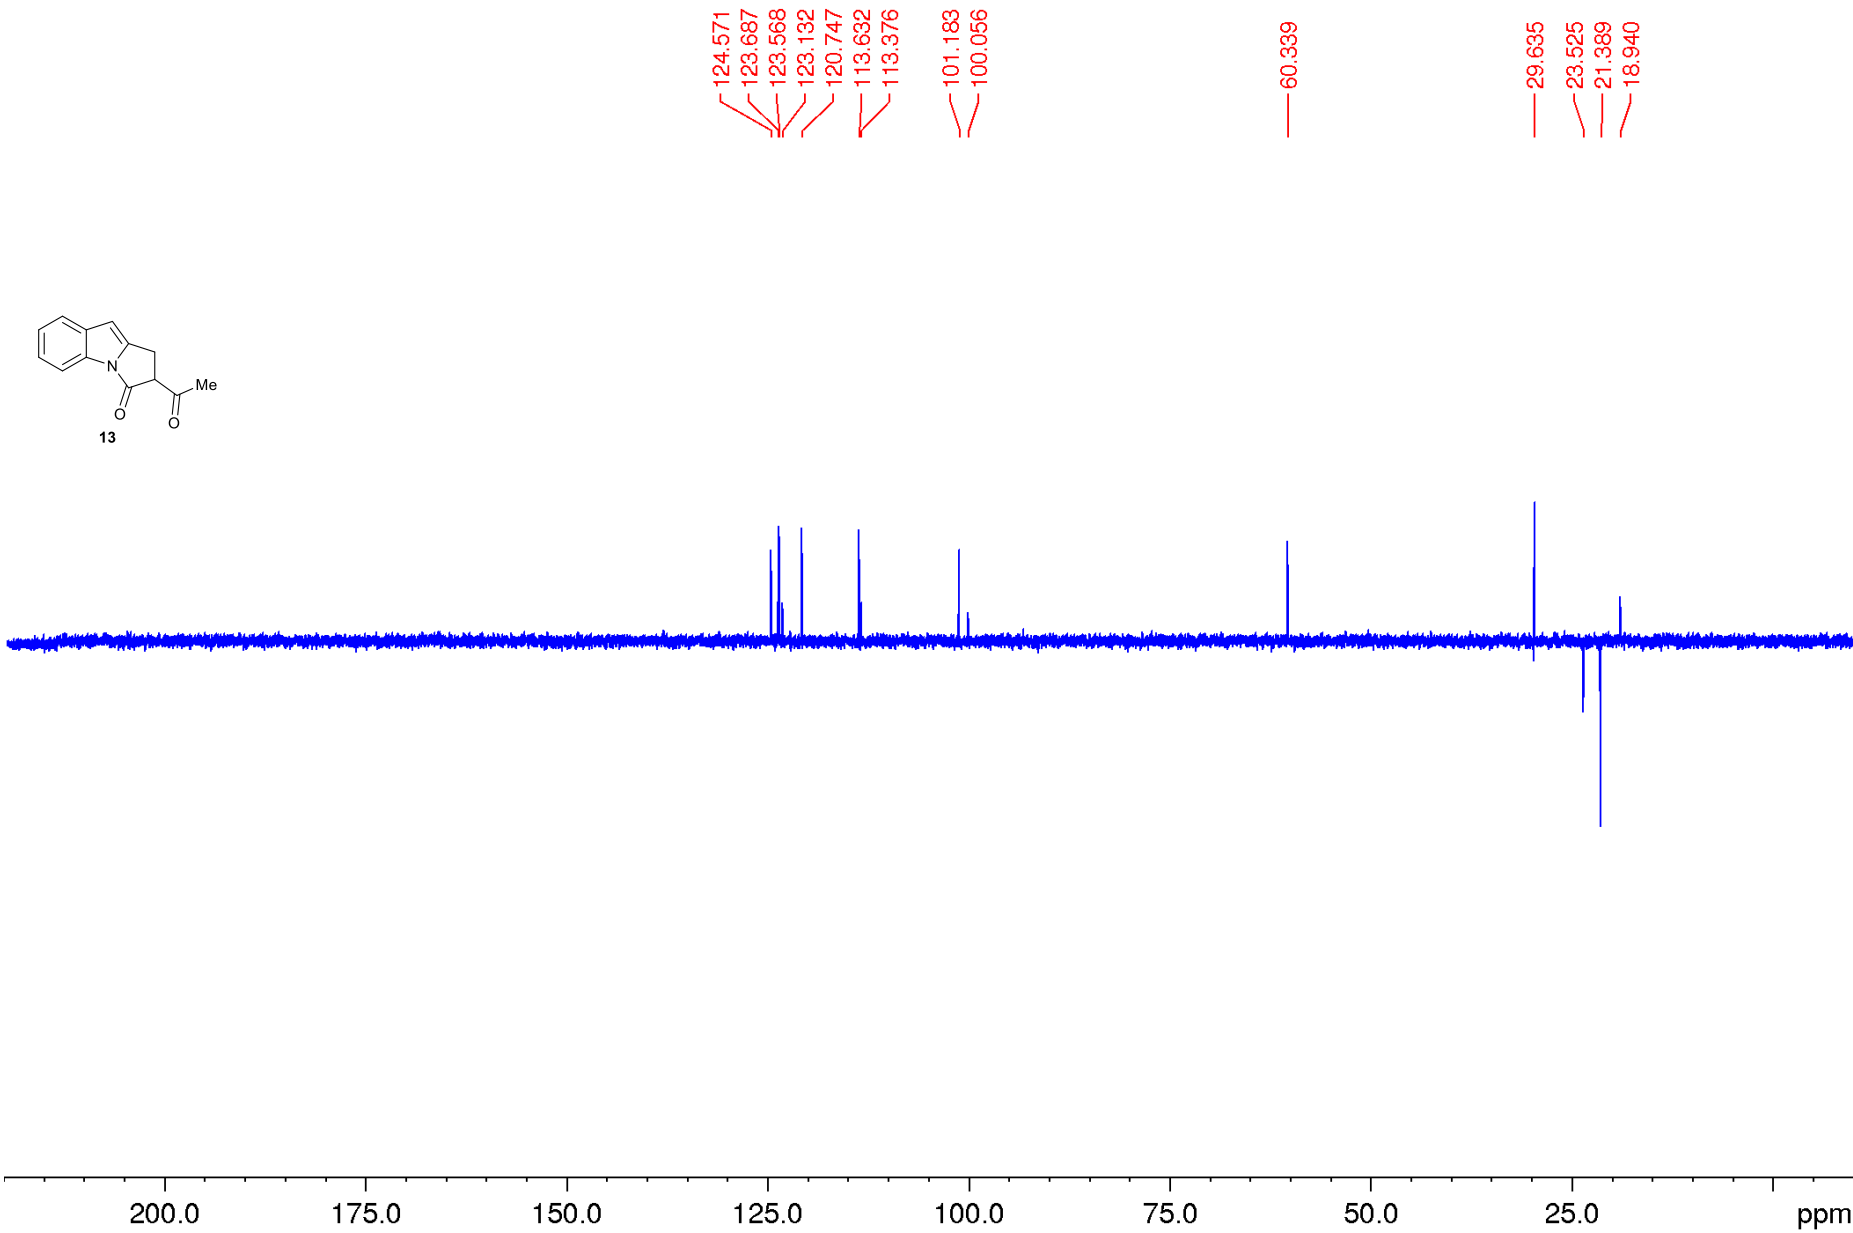

# <sup>1</sup>H NMR-spectrum (400 MHz, CDCl<sub>3</sub>)

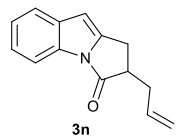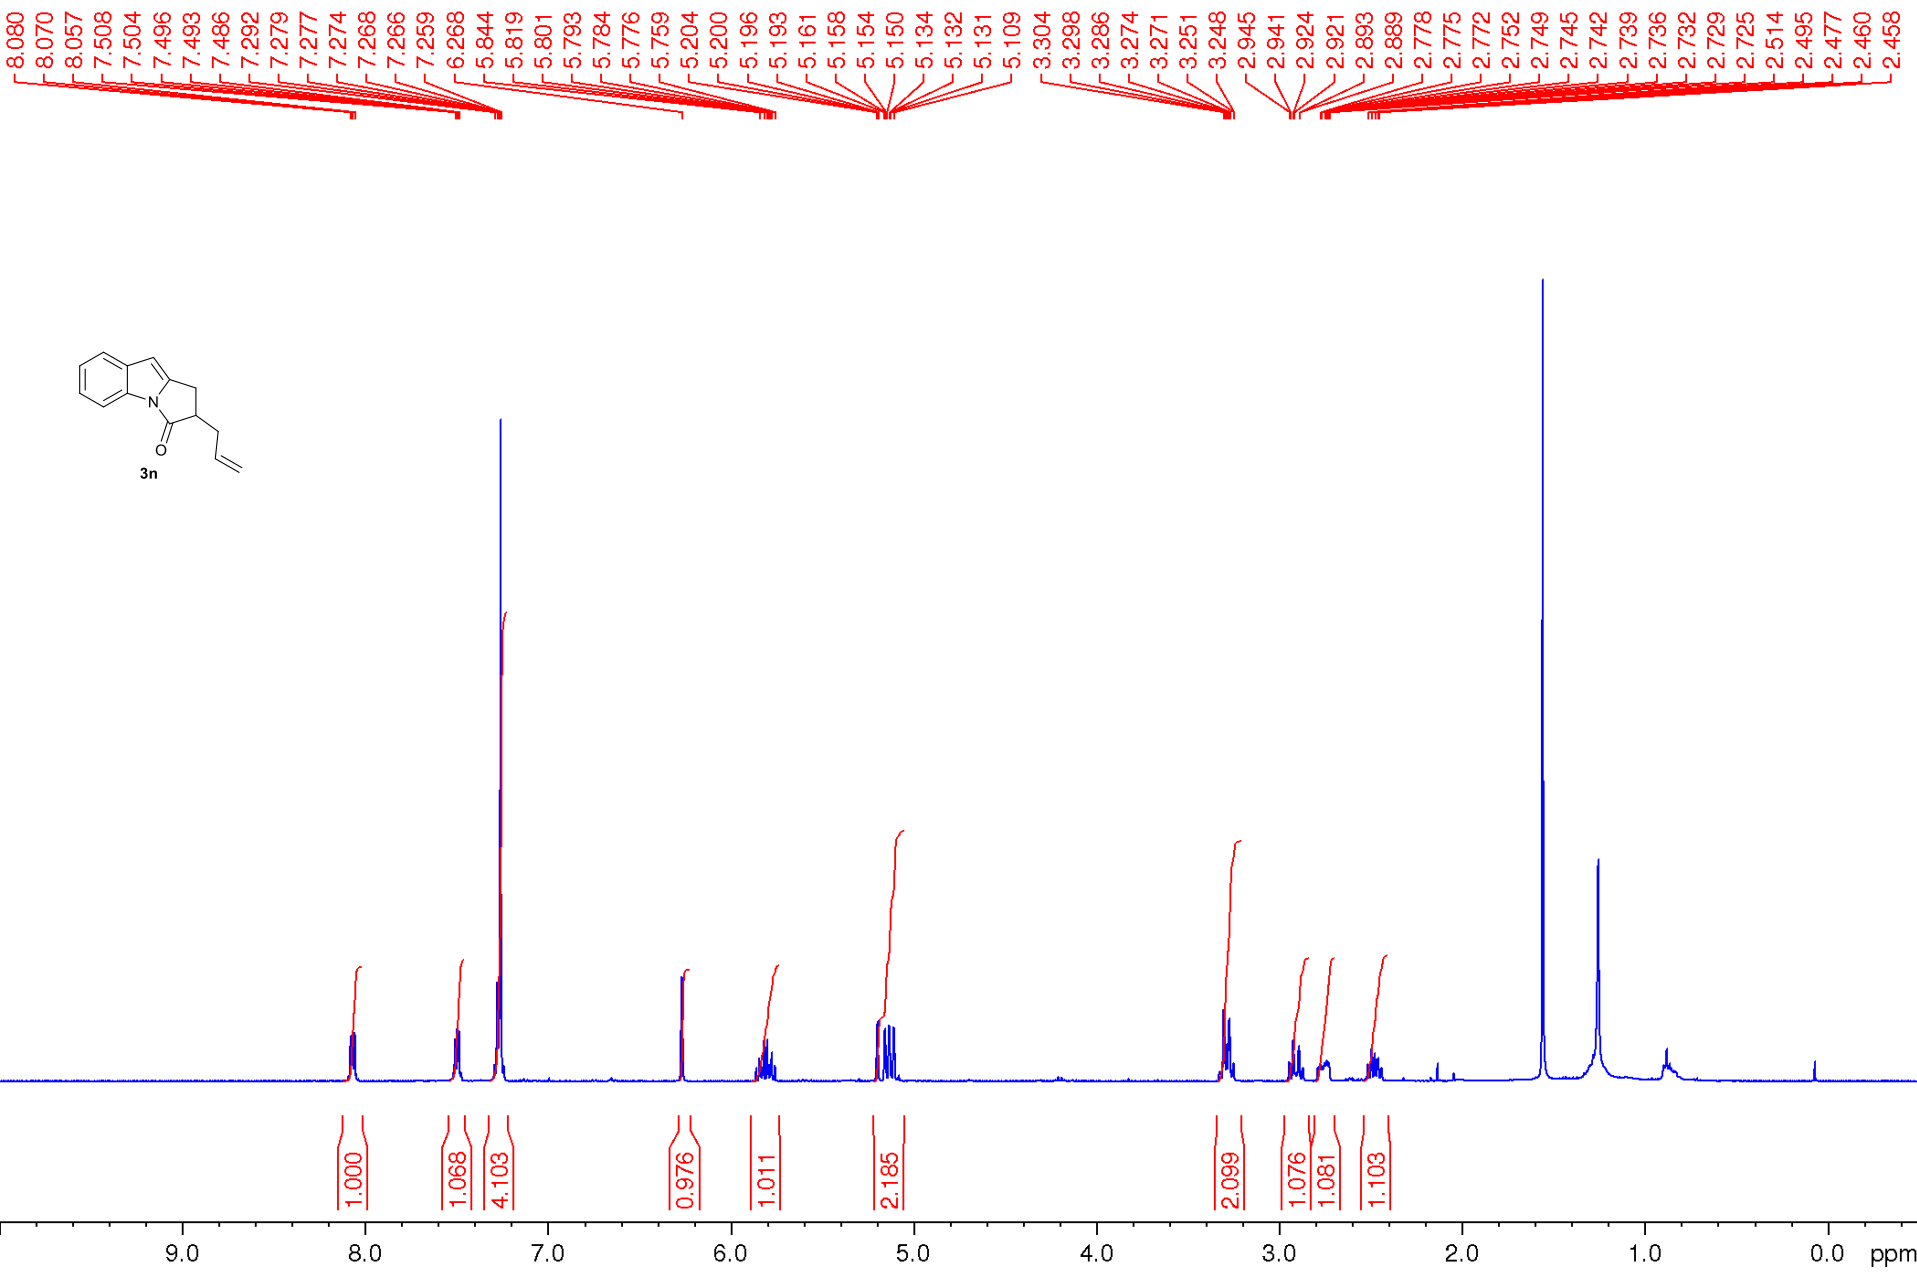

$^{13}\text{C}$  NMR-spectrum (100 MHz,  $\text{CDCl}_3$ )

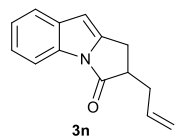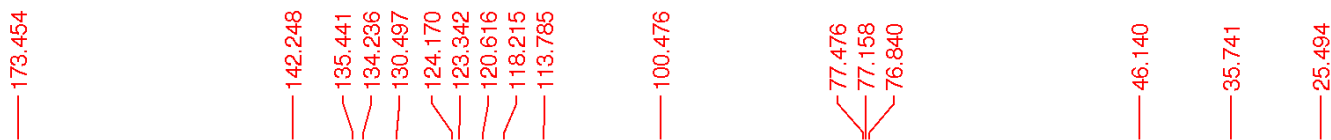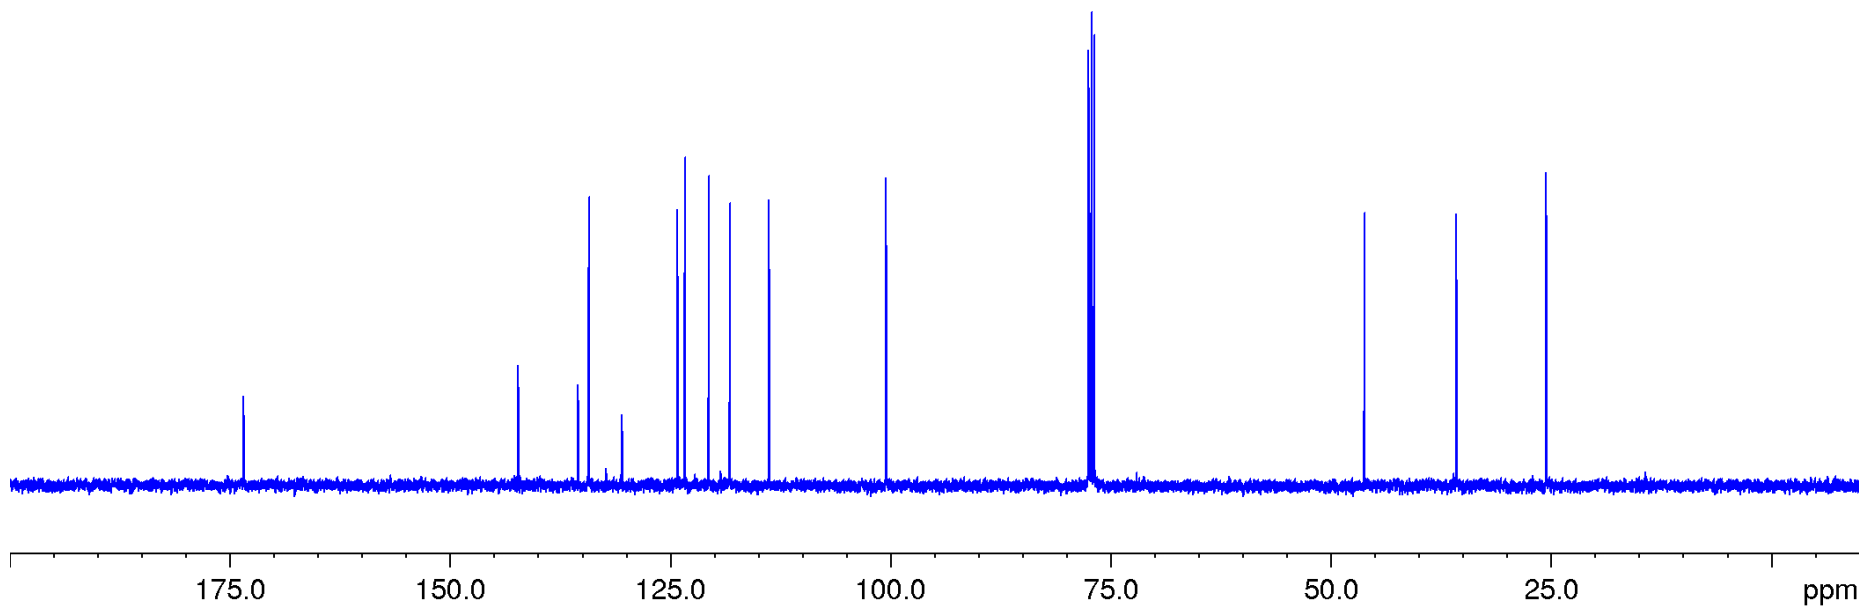

# DEPT 135 NMR-spectrum (CDCl<sub>3</sub>)

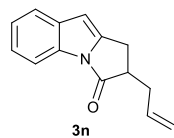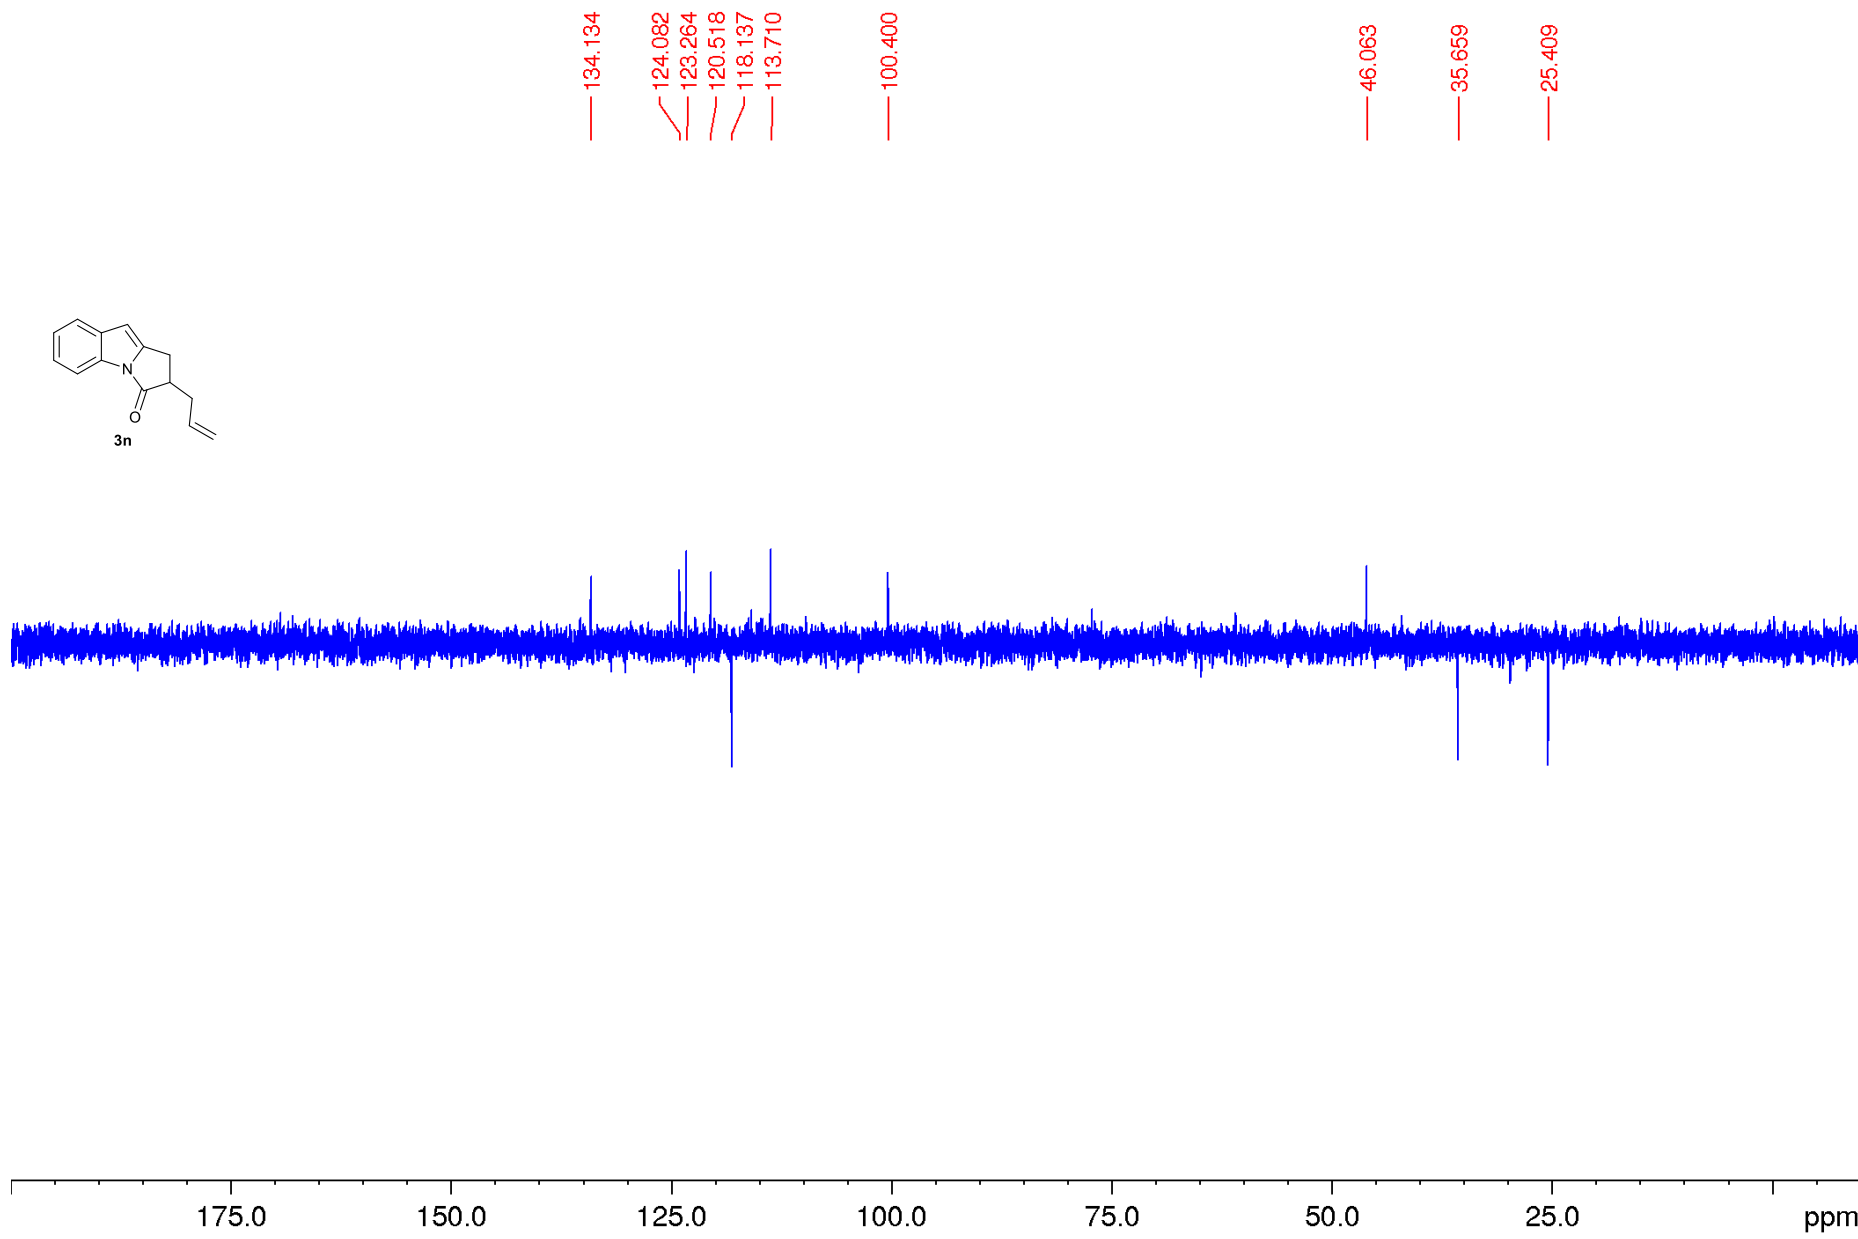

$^1\text{H}$  NMR-spectrum (400 MHz,  $\text{CDCl}_3$ )

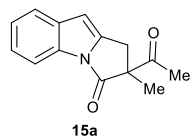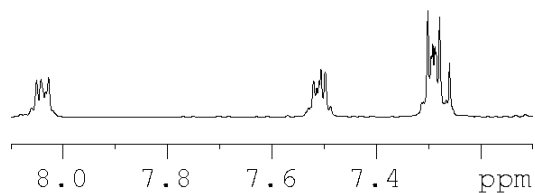

8.049  
8.041  
8.031  
8.027  
7.520  
7.515  
7.510  
7.506  
7.498  
7.301  
7.295  
7.292  
7.288  
7.285  
7.279  
7.260  
6.325

3.857  
3.853  
3.813  
3.810

2.903  
2.899  
2.859  
2.856

2.369

1.697

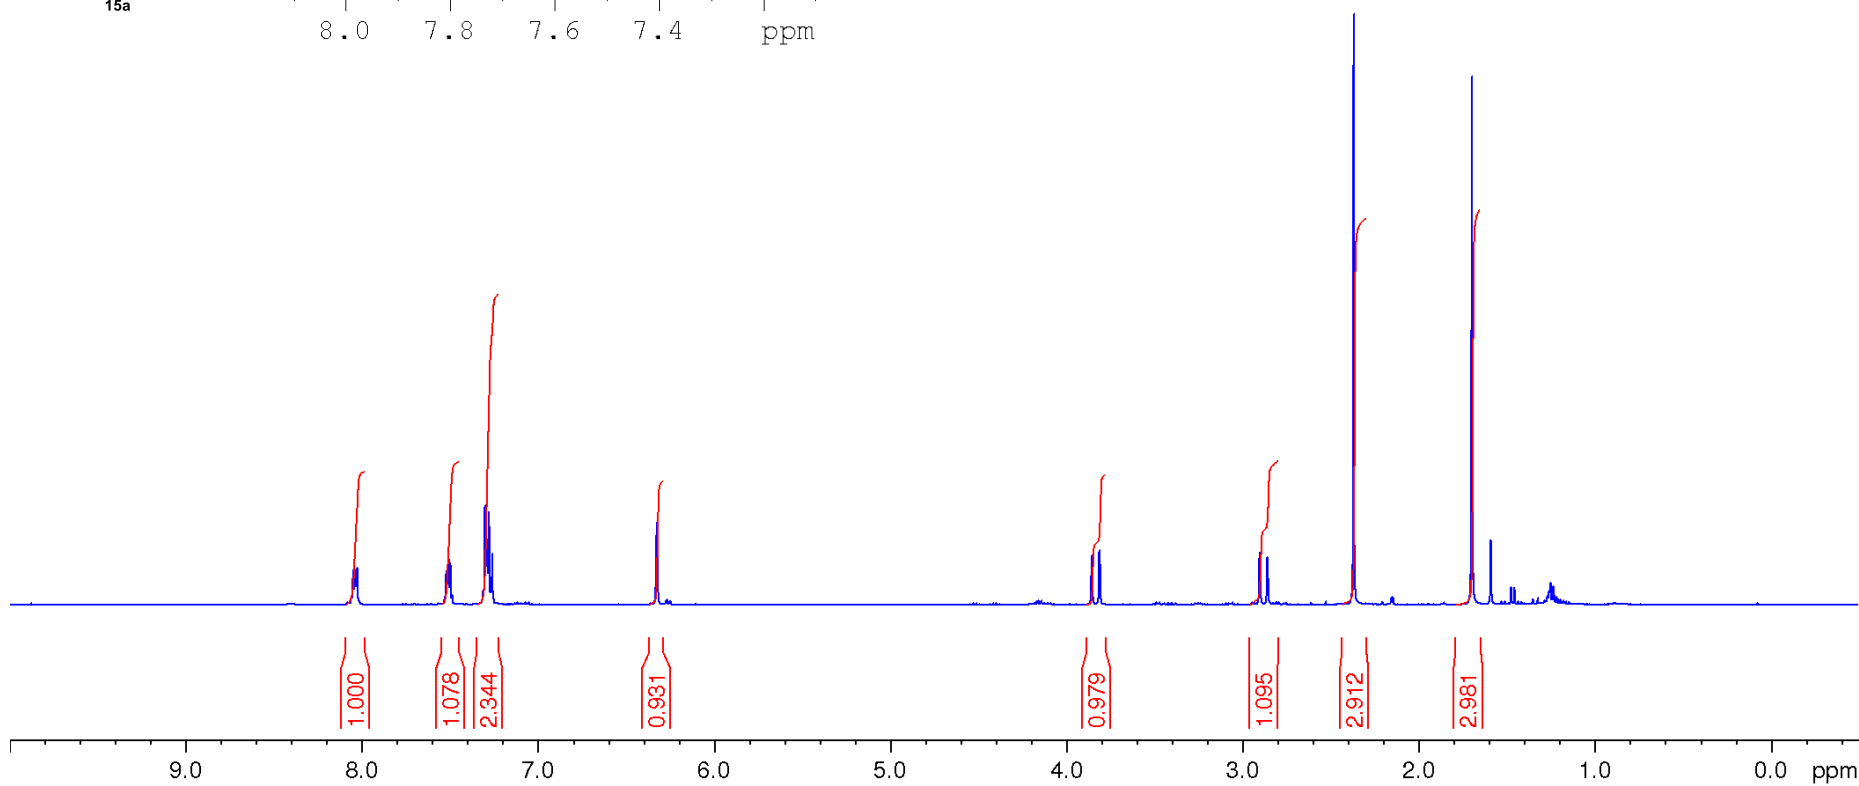

$^{13}\text{C}$  NMR-spectrum (100 MHz,  $\text{CDCl}_3$ )

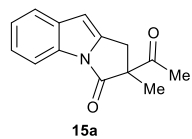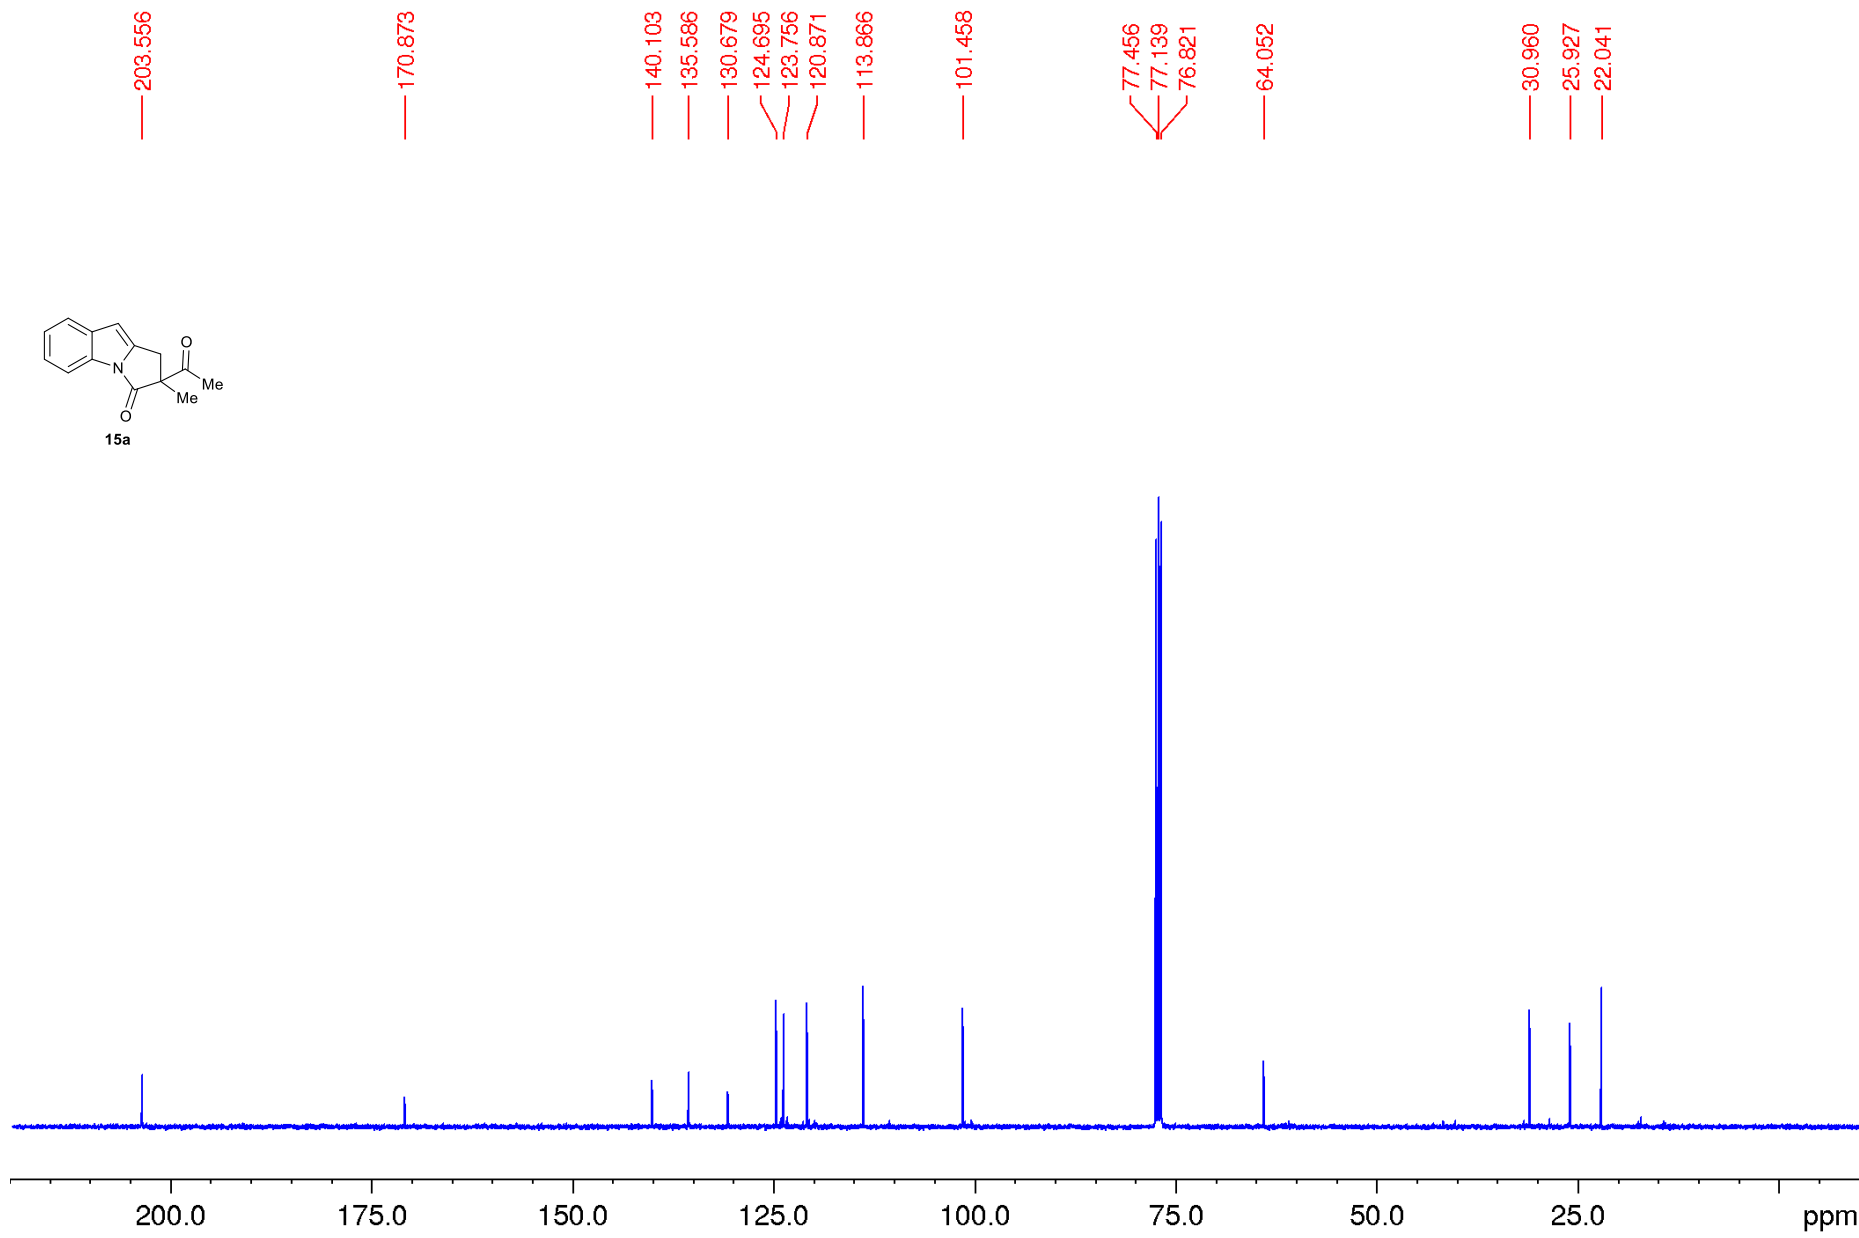

# DEPT 135 NMR-spectrum (CDCl<sub>3</sub>)

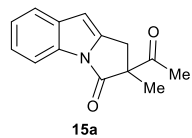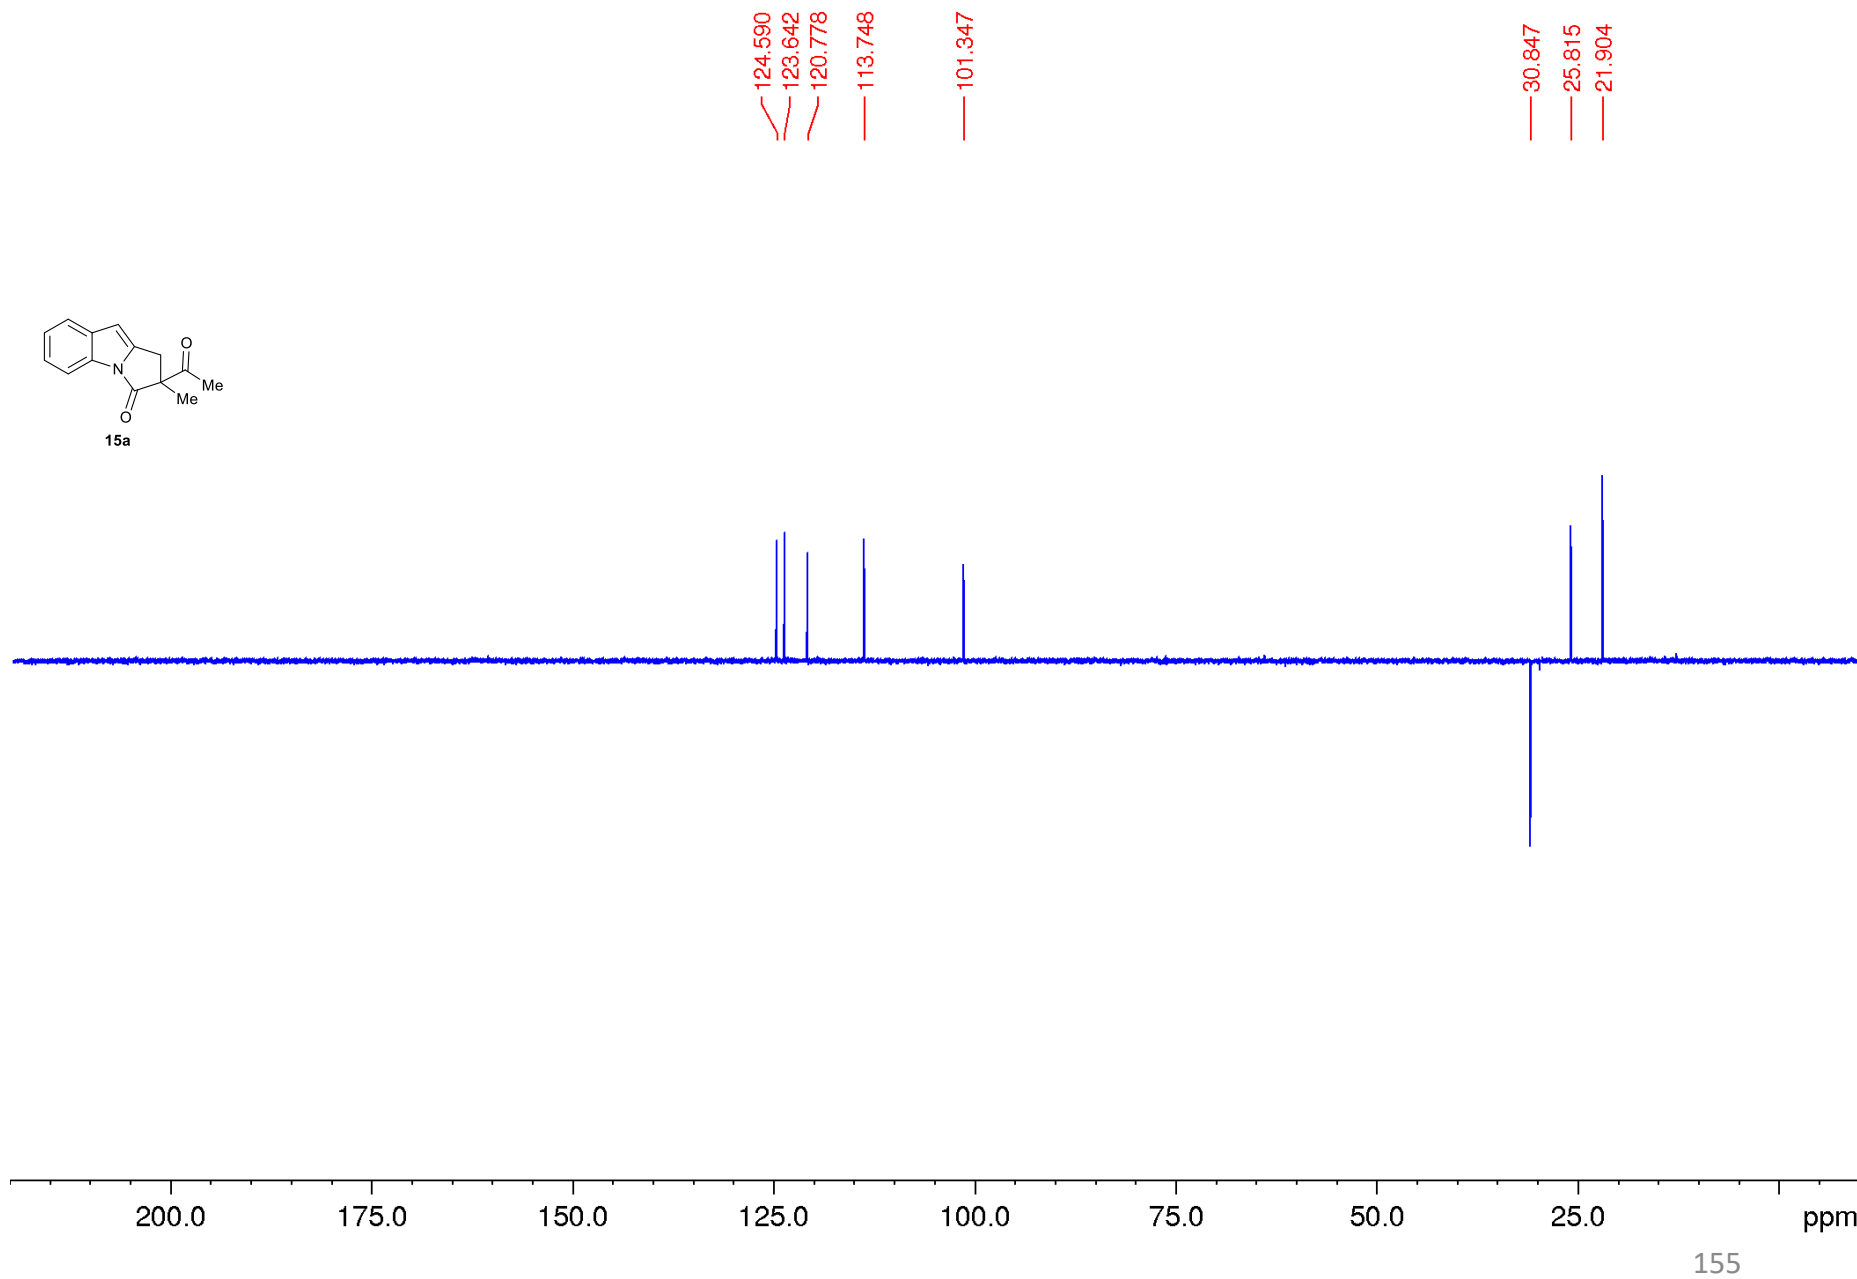

# <sup>1</sup>H NMR-spectrum (400 MHz, CDCl<sub>3</sub>)

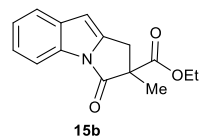

7.979 7.969 7.960 7.954 7.946 7.936 7.936 7.936 7.926 7.918 7.912 7.904 7.894 7.819 7.808 7.800 7.793 7.786 7.780 7.775 6.234 4.241 4.236 4.223 4.218 4.205 4.200 4.187 4.182 4.057 4.045 4.034 4.022 3.499 3.495 3.487 3.483 3.456 3.452 3.443 3.440 3.339 3.336 3.316 3.313 3.296 3.293 3.273 3.270 1.271 1.253 1.235

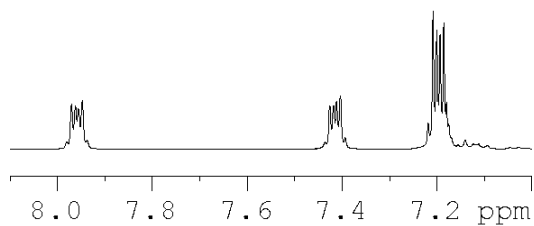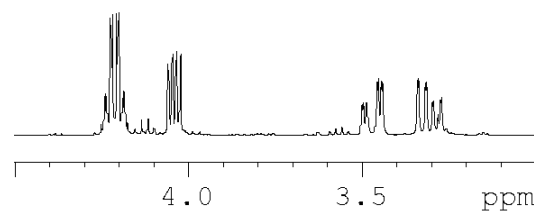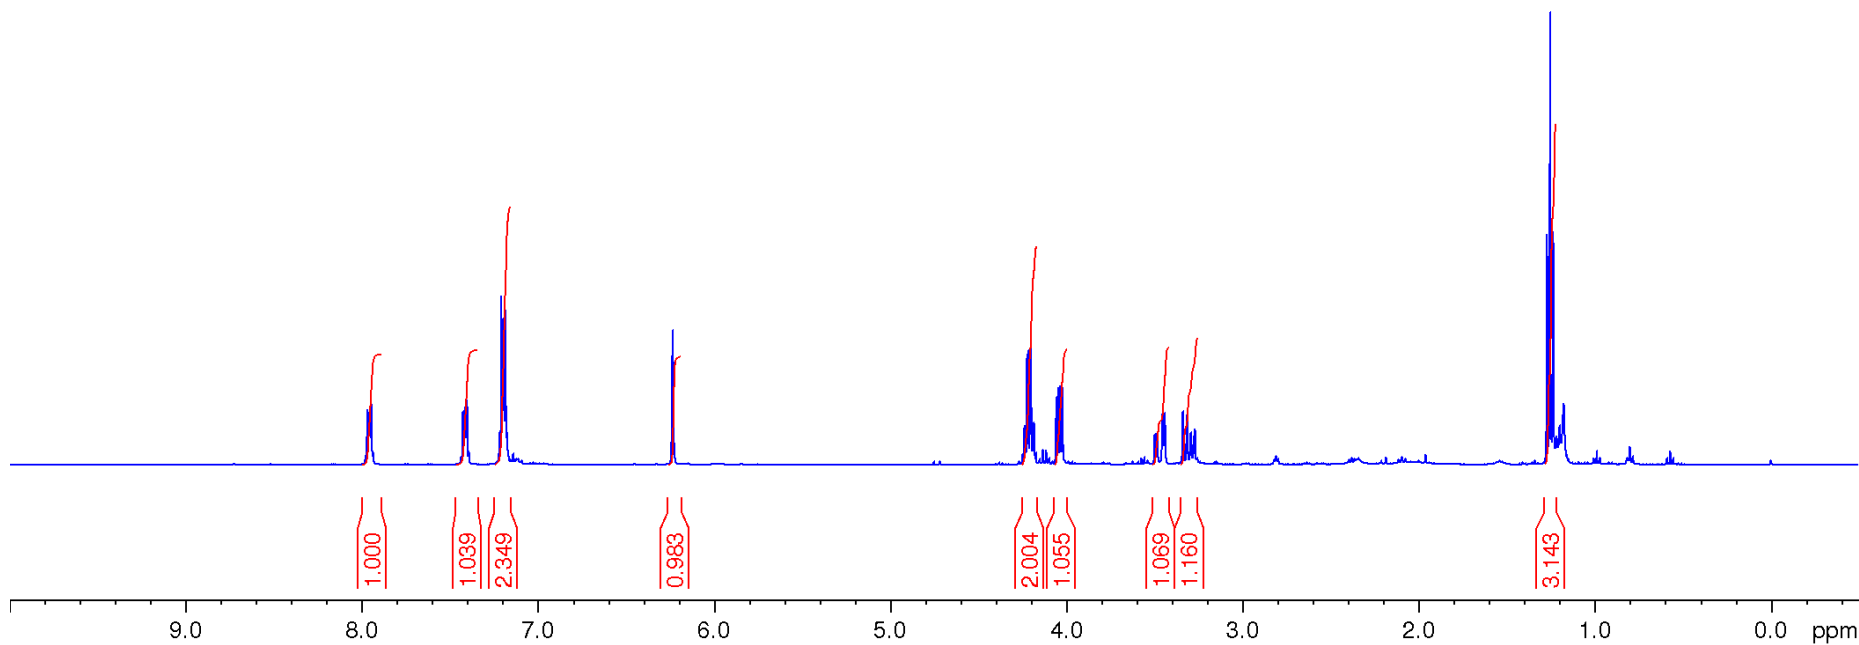



$^{13}\text{C}$  NMR-spectrum (100 MHz,  $\text{CDCl}_3$ )

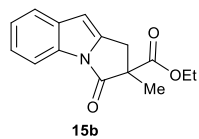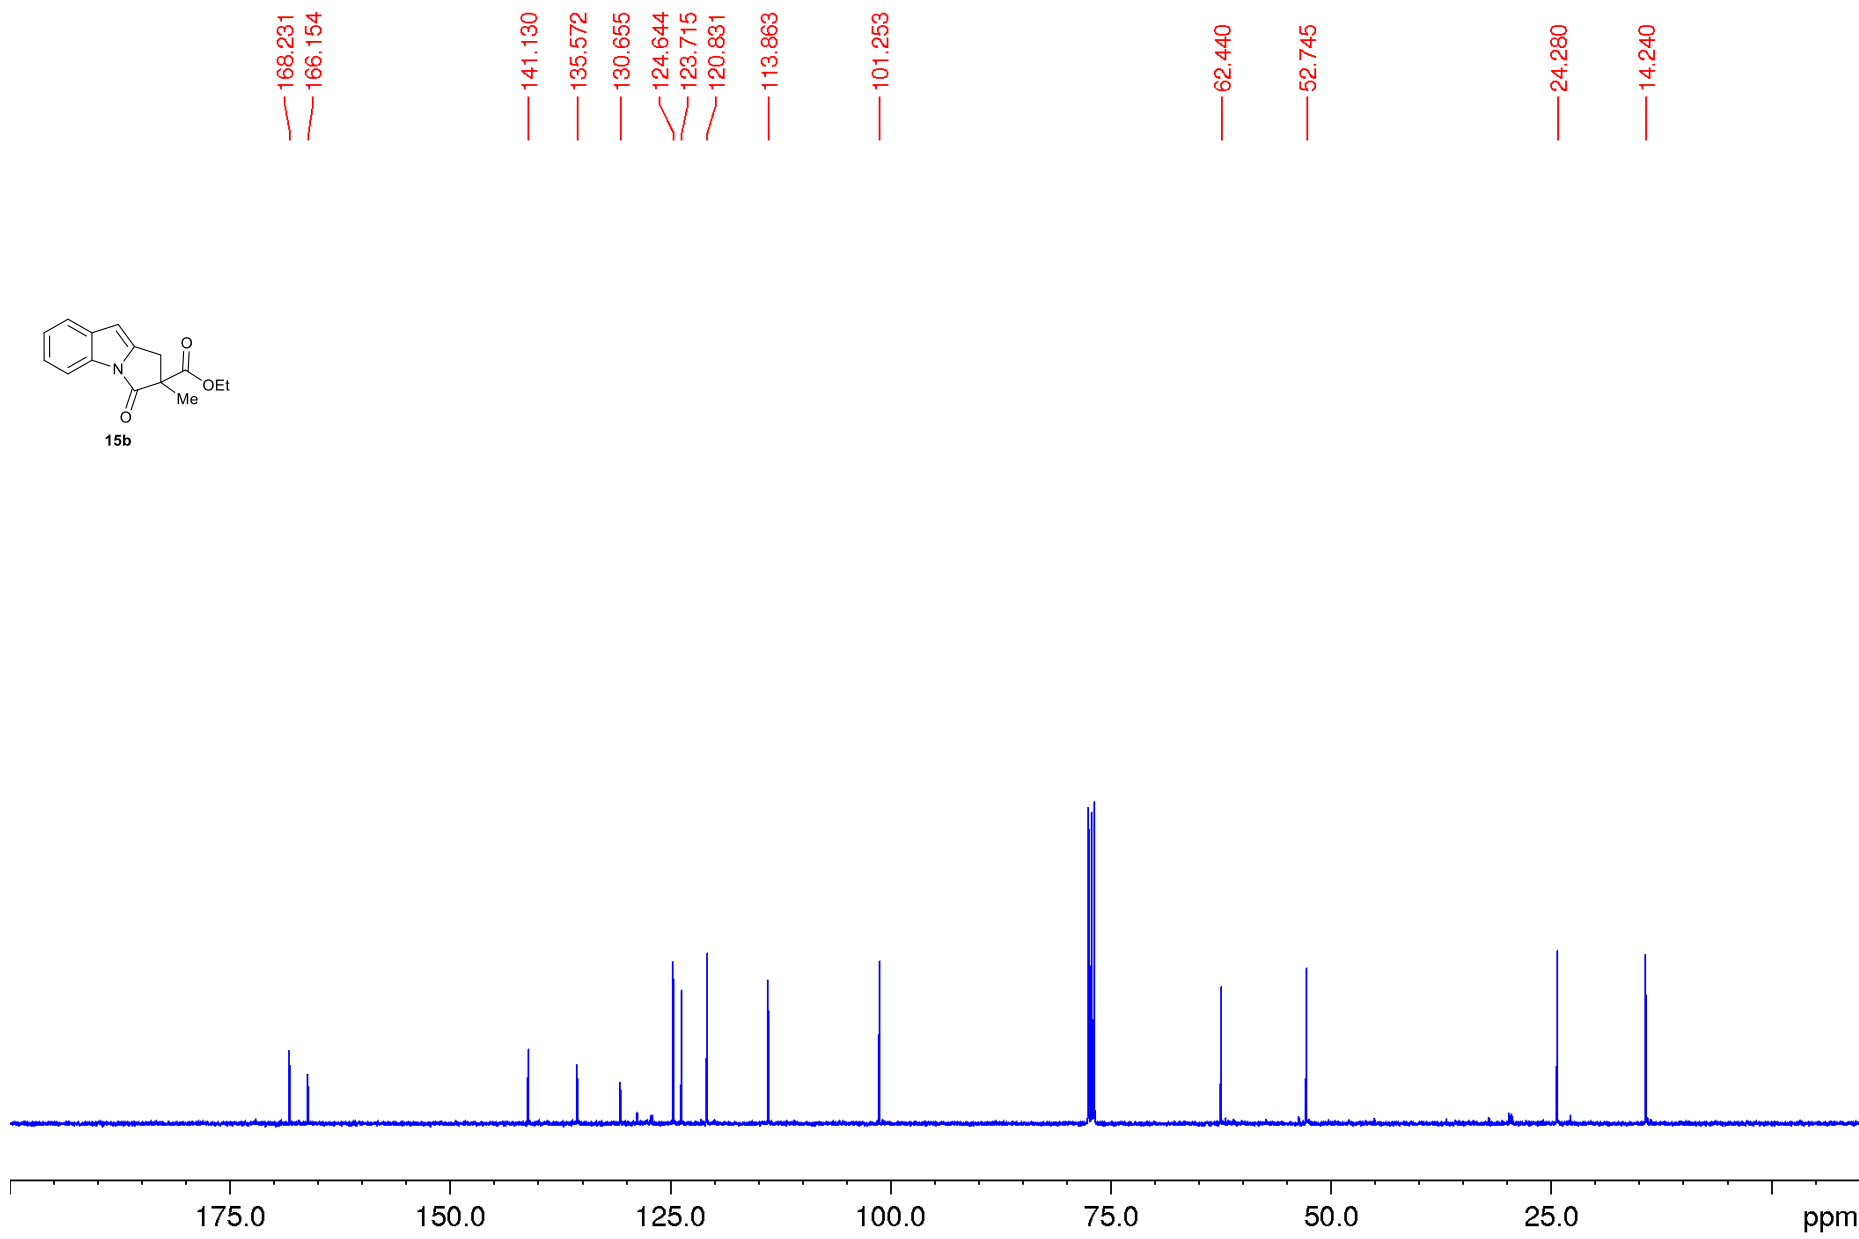

# DEPT 135 NMR-spectrum (CDCl<sub>3</sub>)

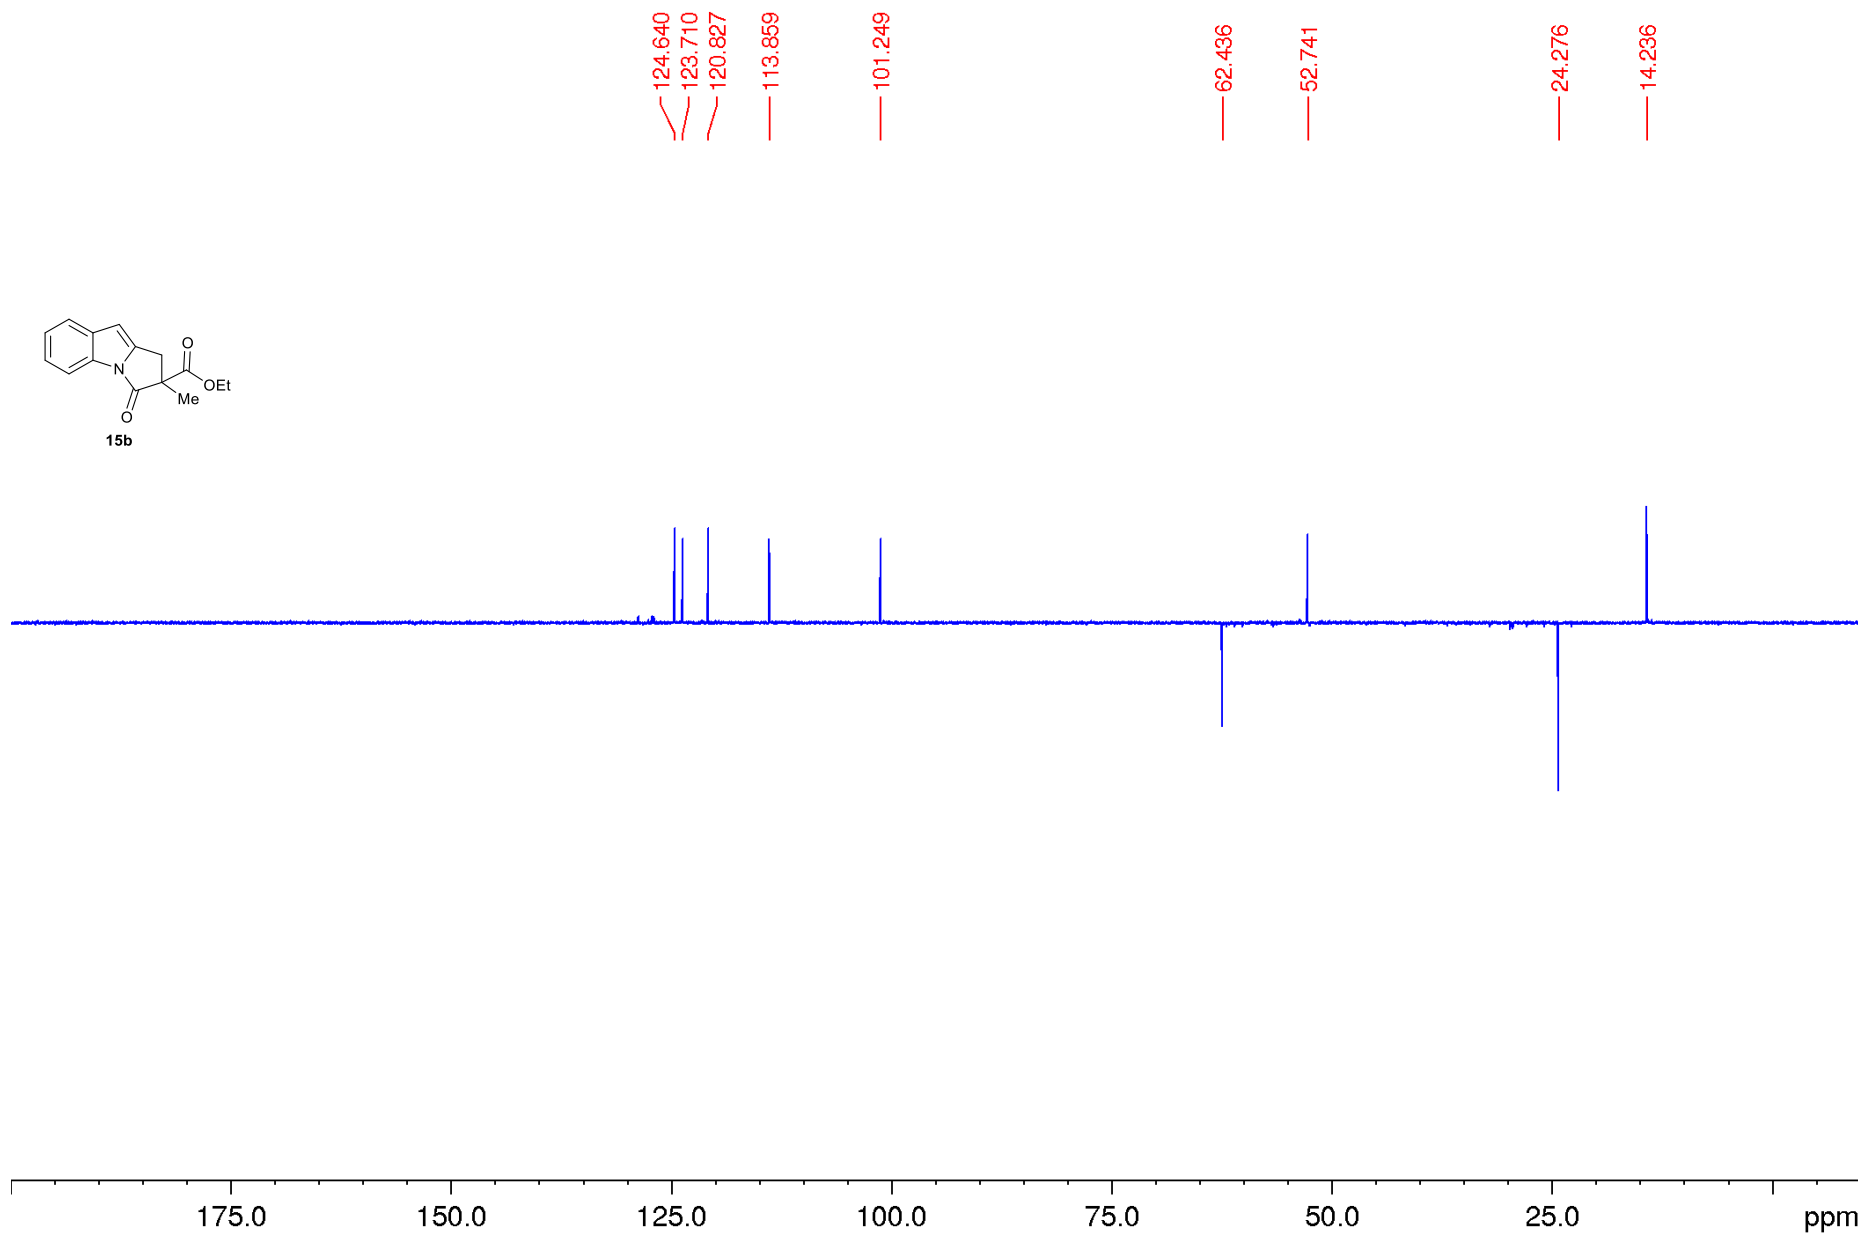

# $^1\text{H}$ NMR-spectrum (400 MHz, $\text{DMSO-}d_6$ )

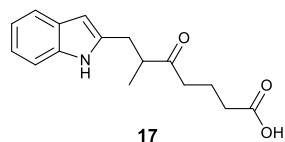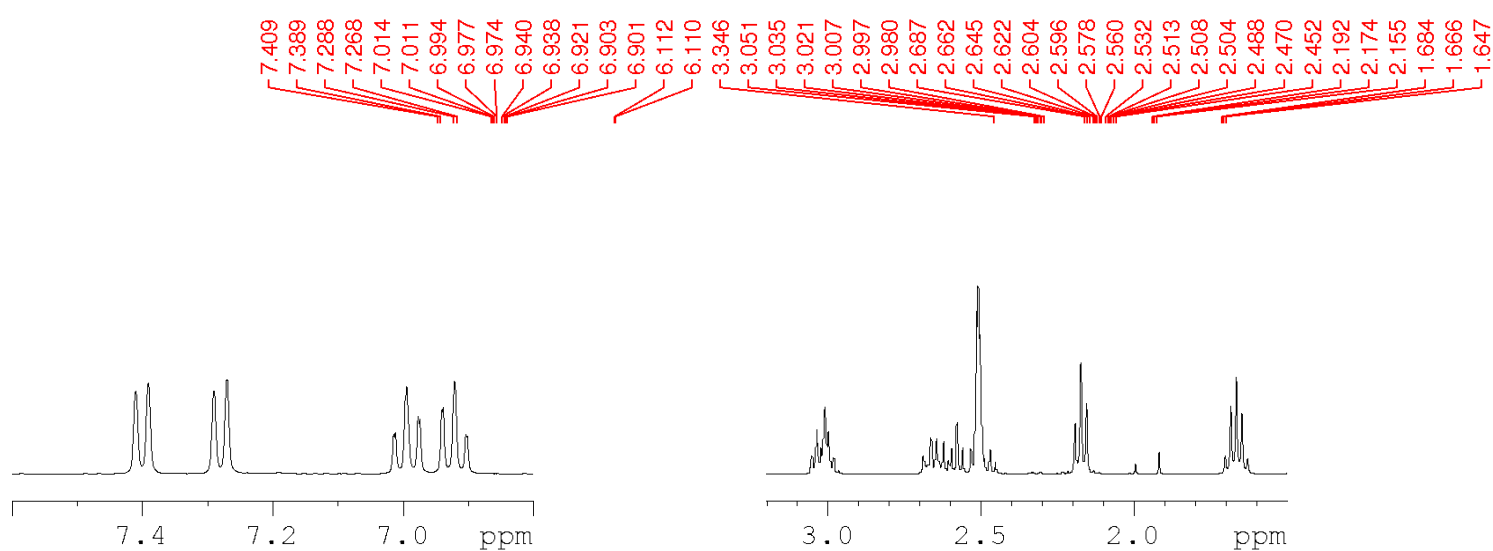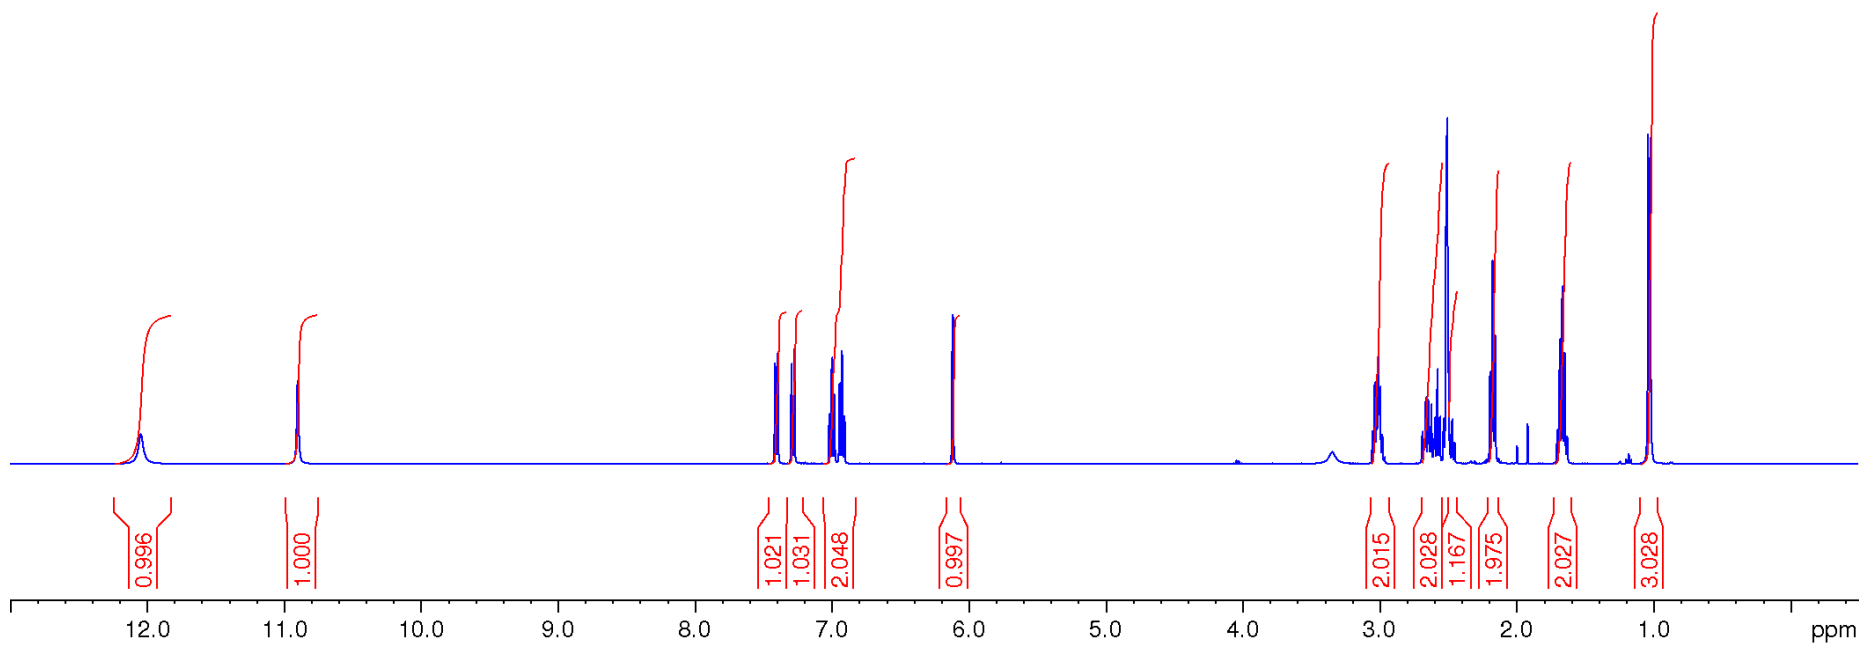

$^{13}\text{C}$  NMR-spectrum (100 MHz,  $\text{DMSO-}d_6$ )

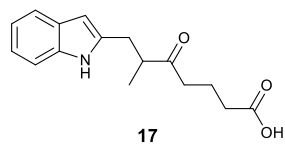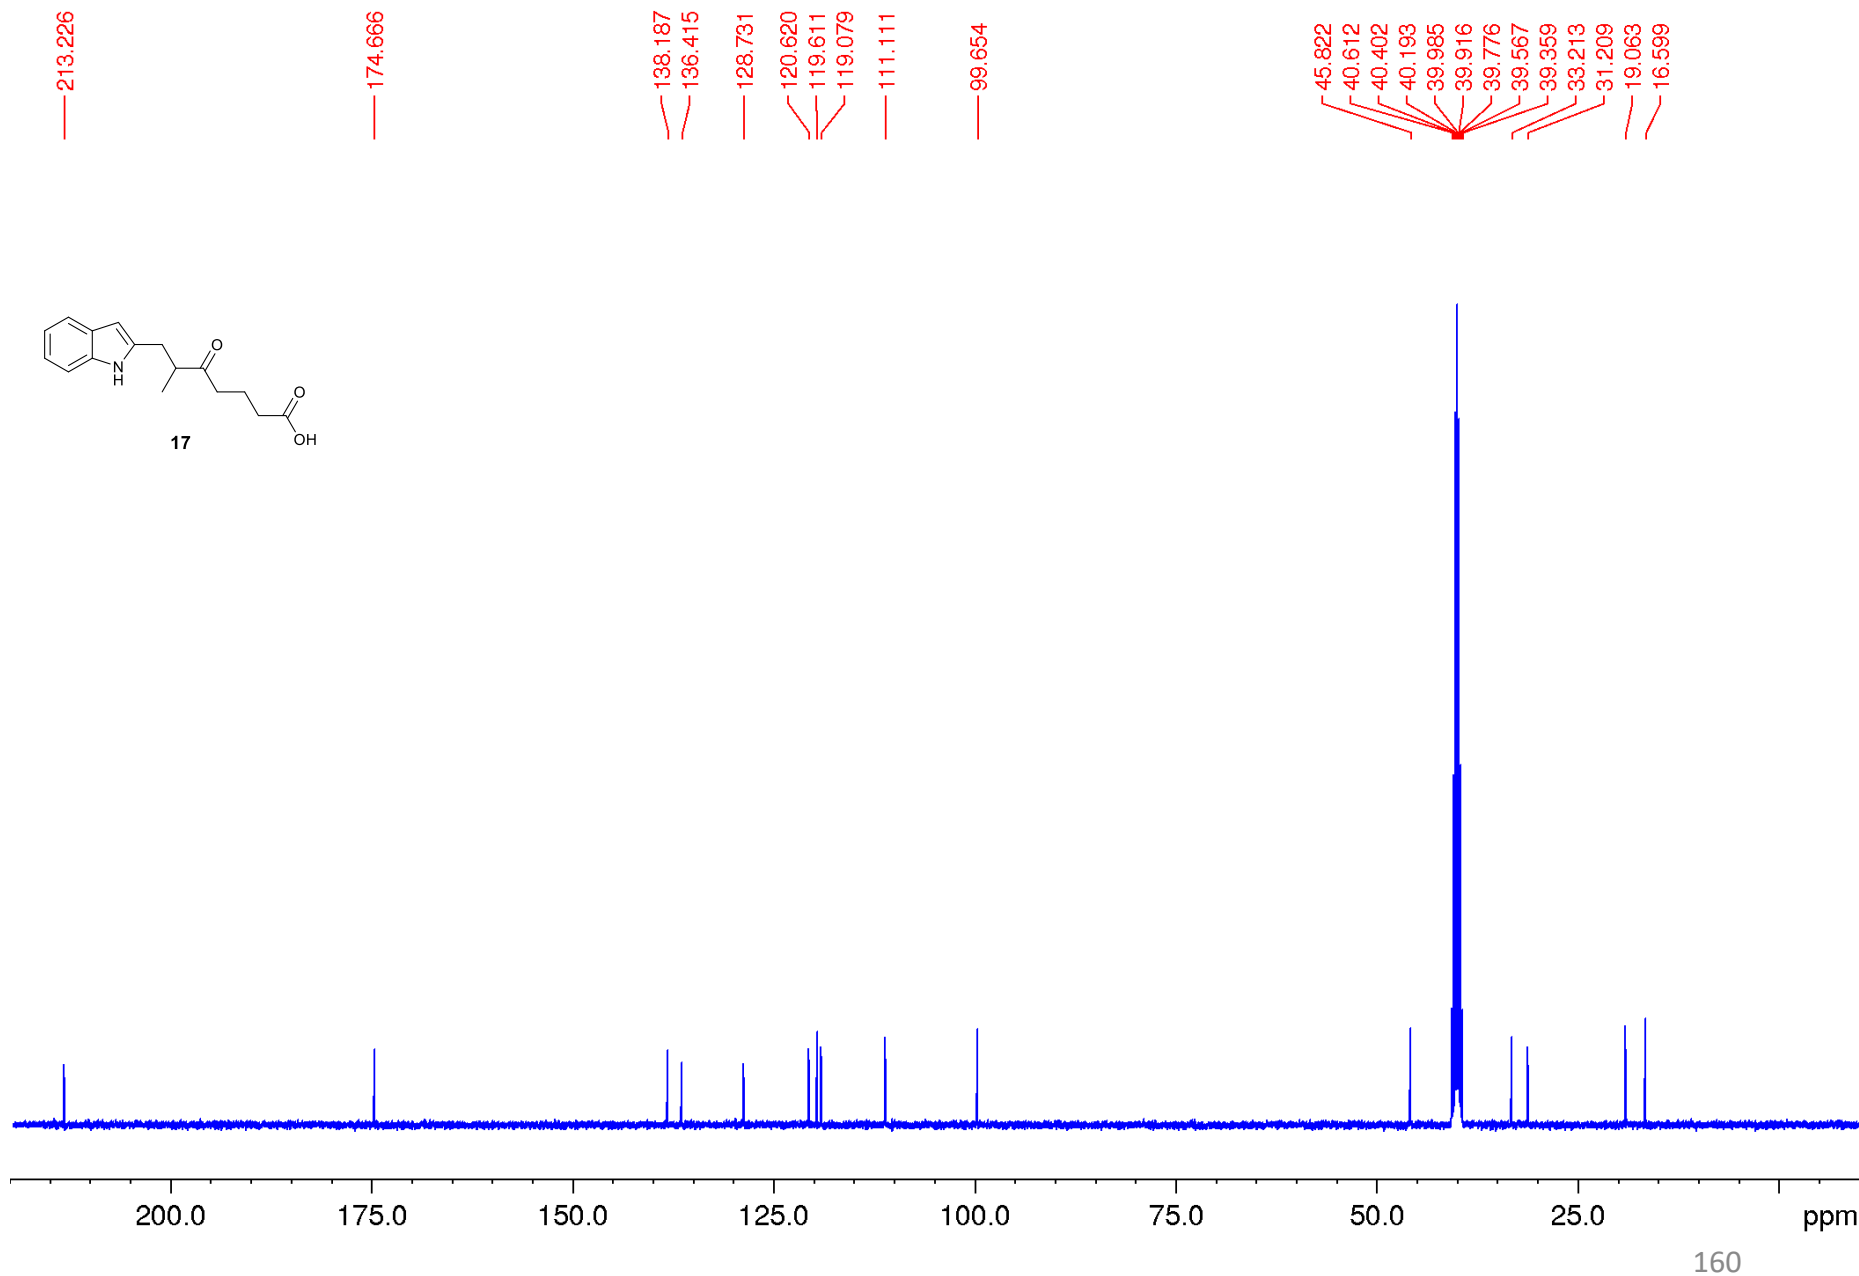

# DEPT 135 NMR-spectrum (DMSO- $d_6$ )

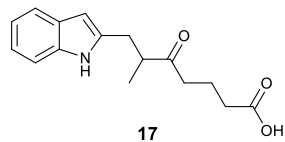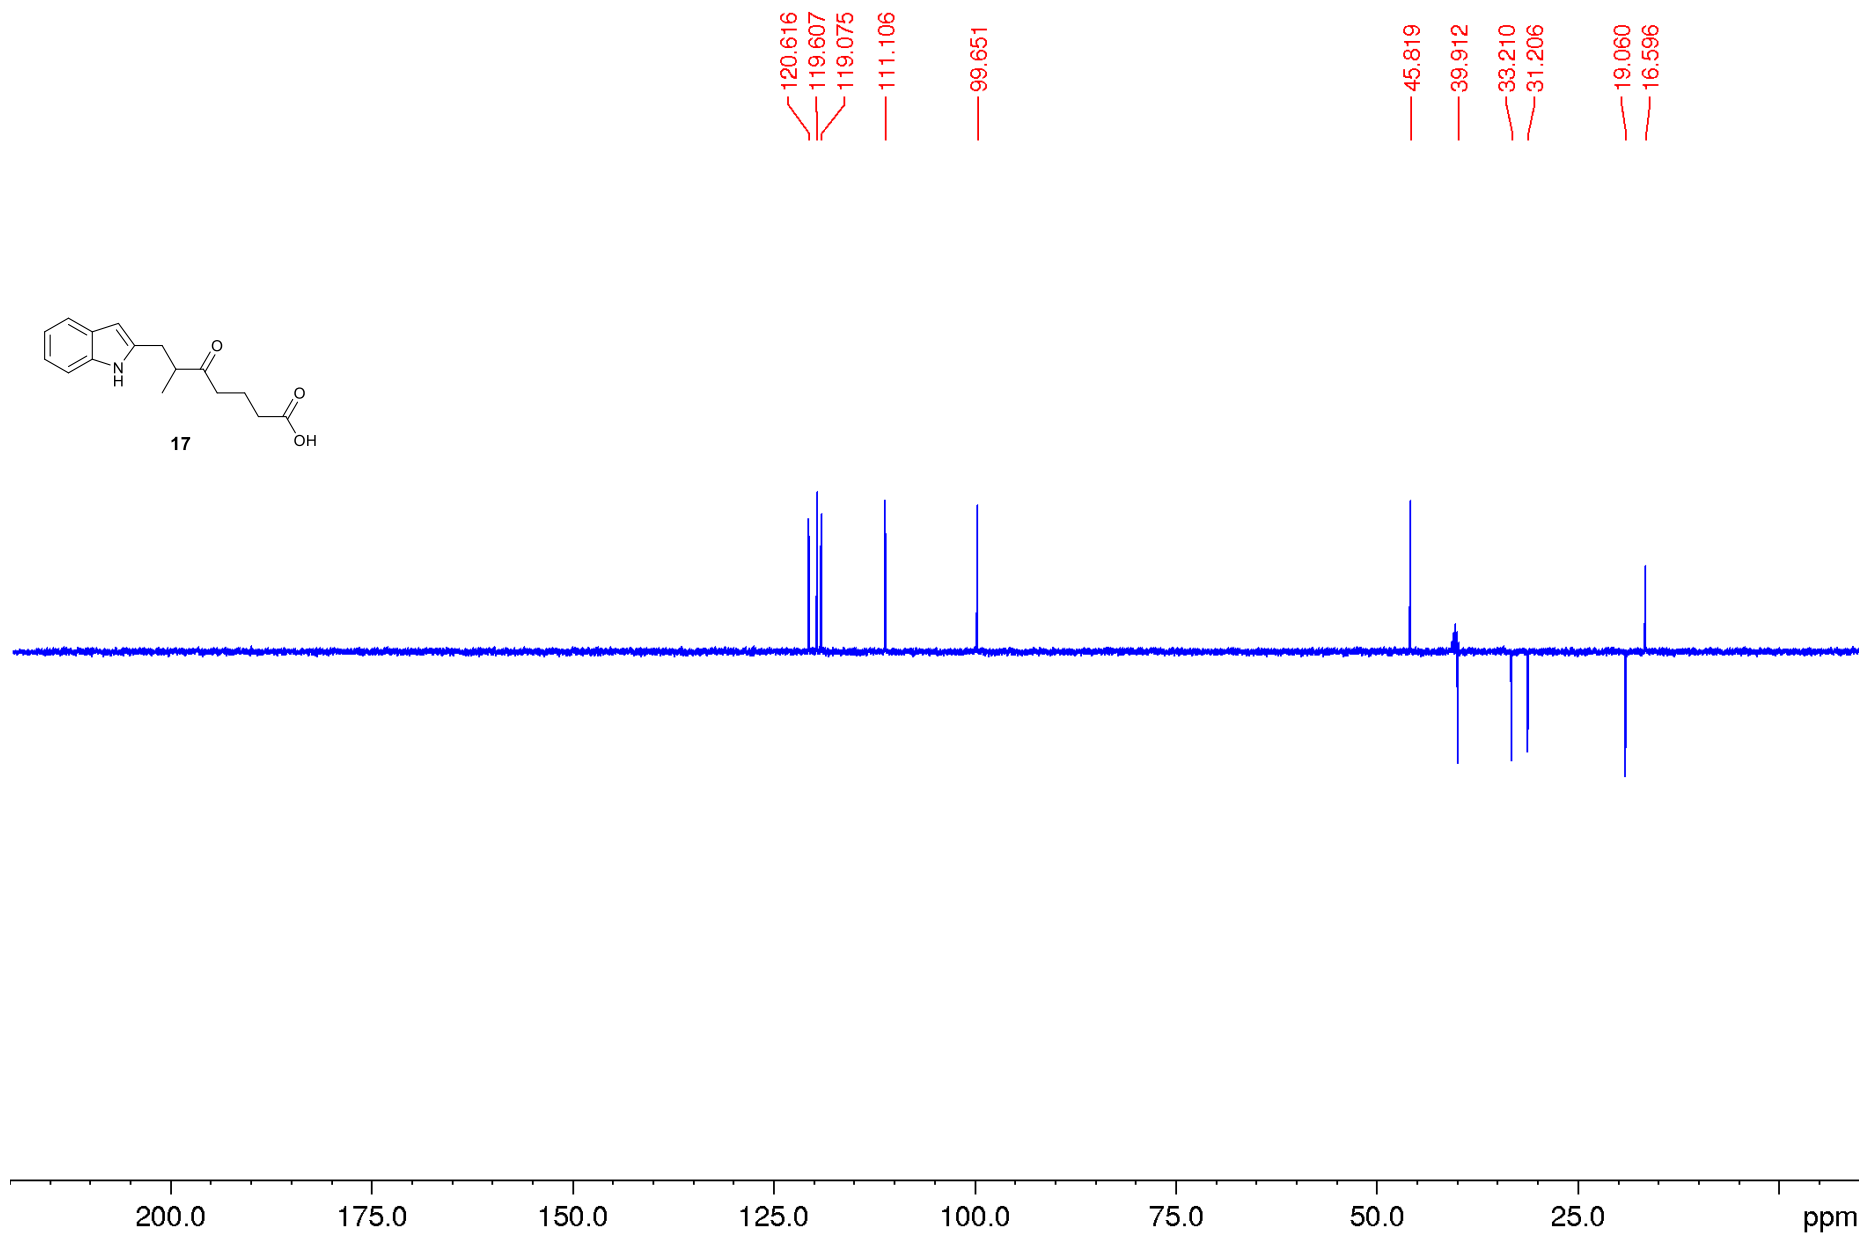

# $^1\text{H}$ NMR-spectrum (400 MHz, $\text{CDCl}_3$ )

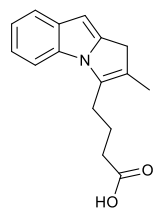

18

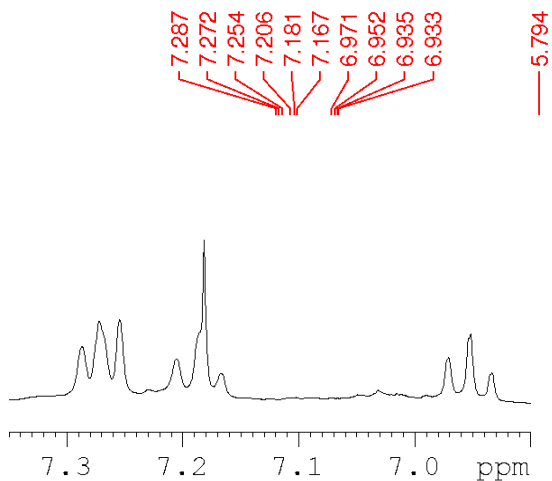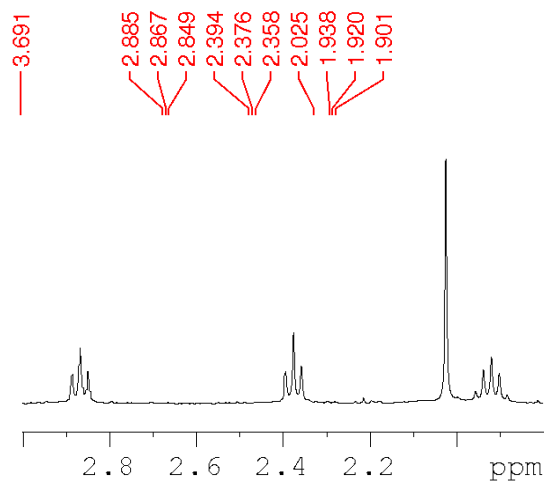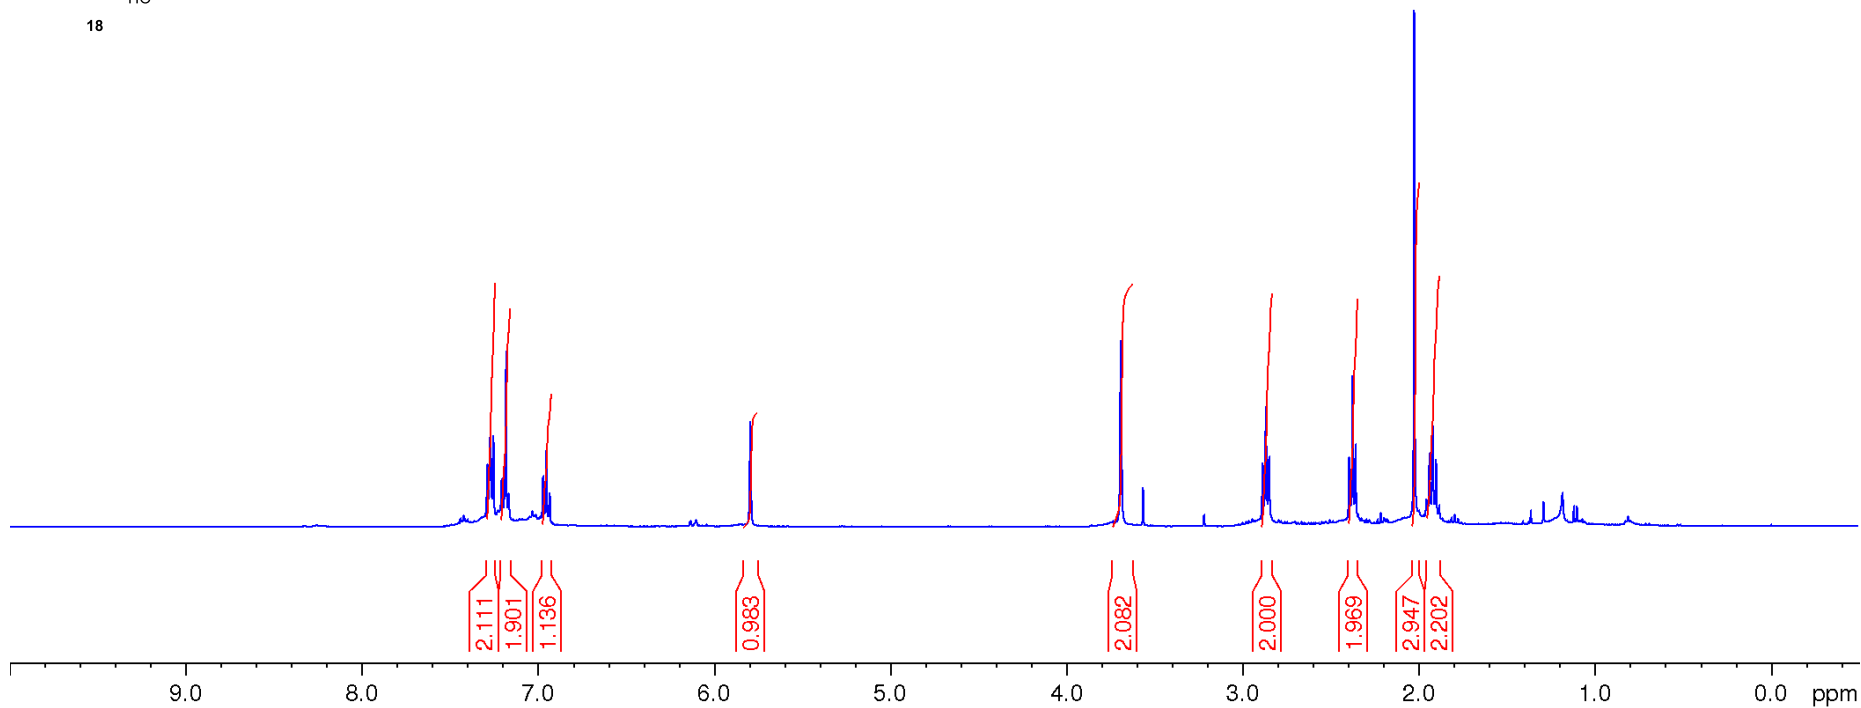

$^{13}\text{C}$  NMR-spectrum (100 MHz,  $\text{CDCl}_3$ )

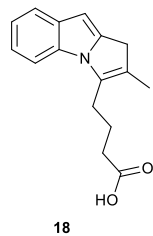

179.139  
142.063  
135.162  
133.958  
127.549  
125.902  
122.285  
122.155  
120.803  
110.297  
102.810  
77.471  
77.153  
76.836  
32.944  
28.840  
25.016  
24.005  
11.675

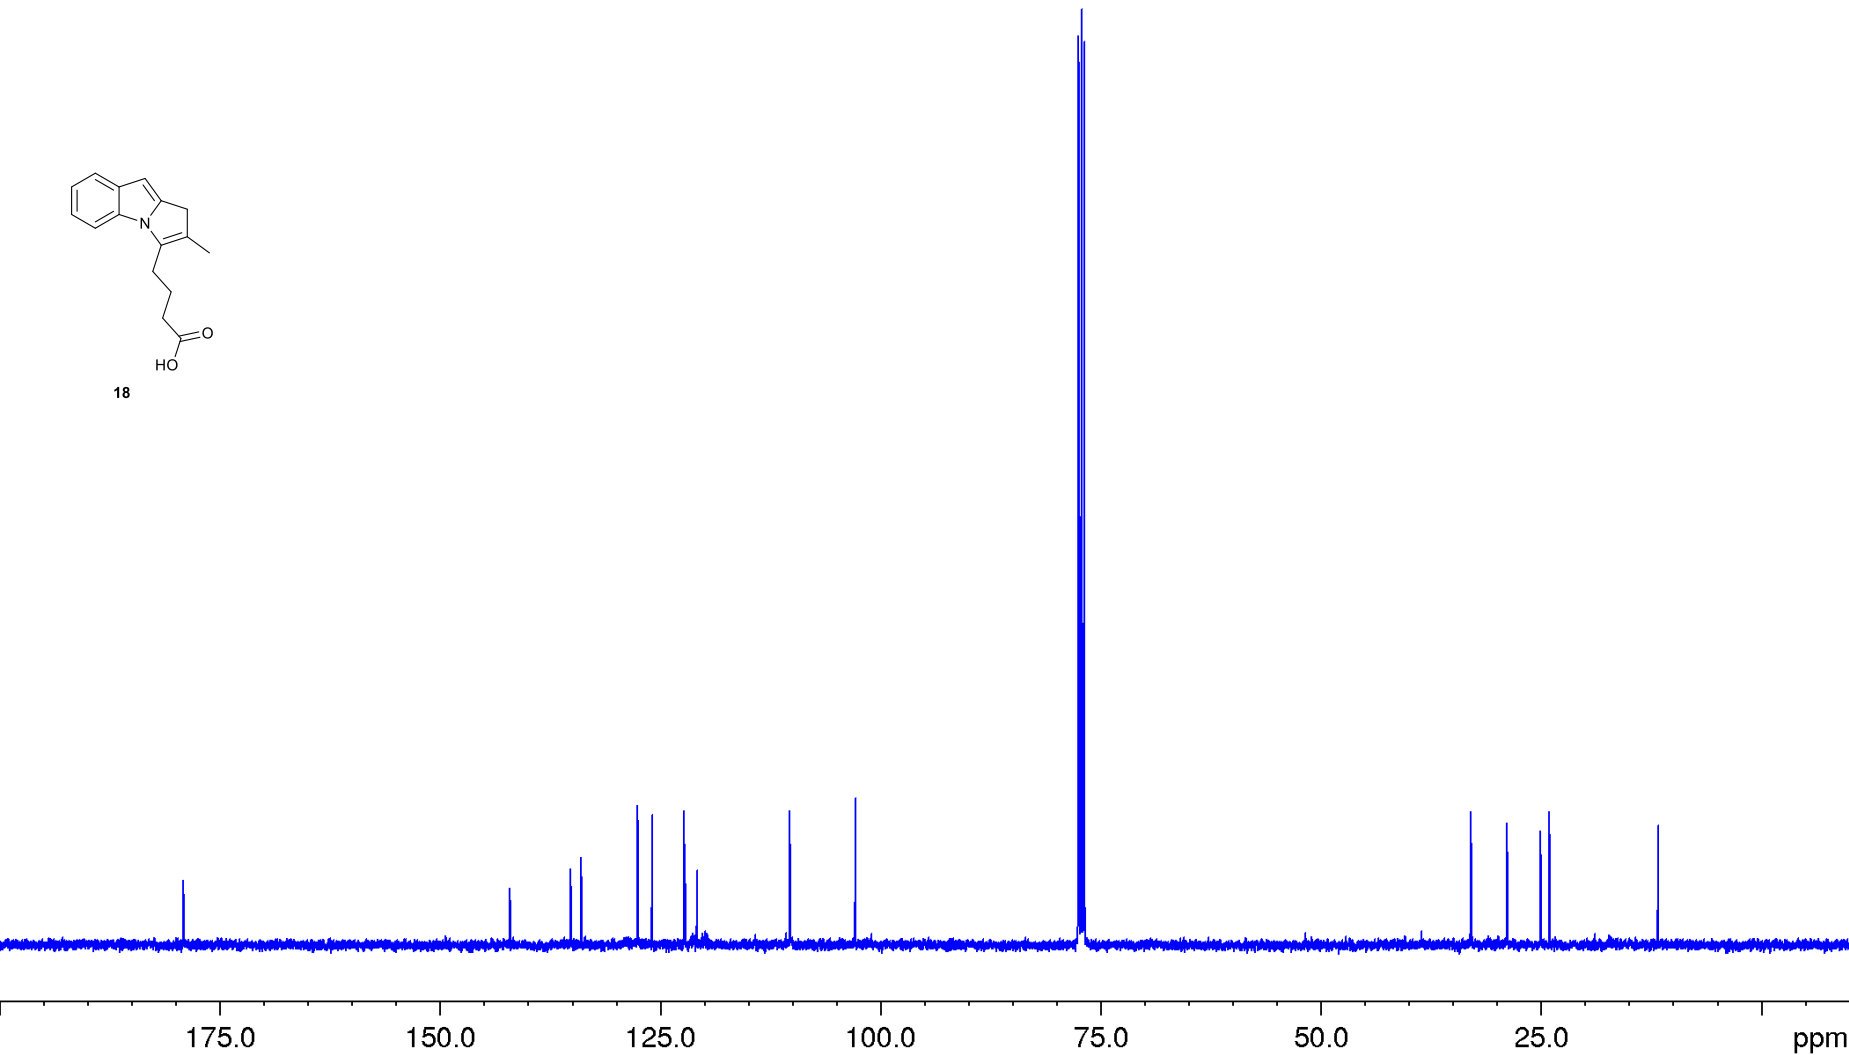

DEPT 135 NMR-spectrum (CDCl<sub>3</sub>)

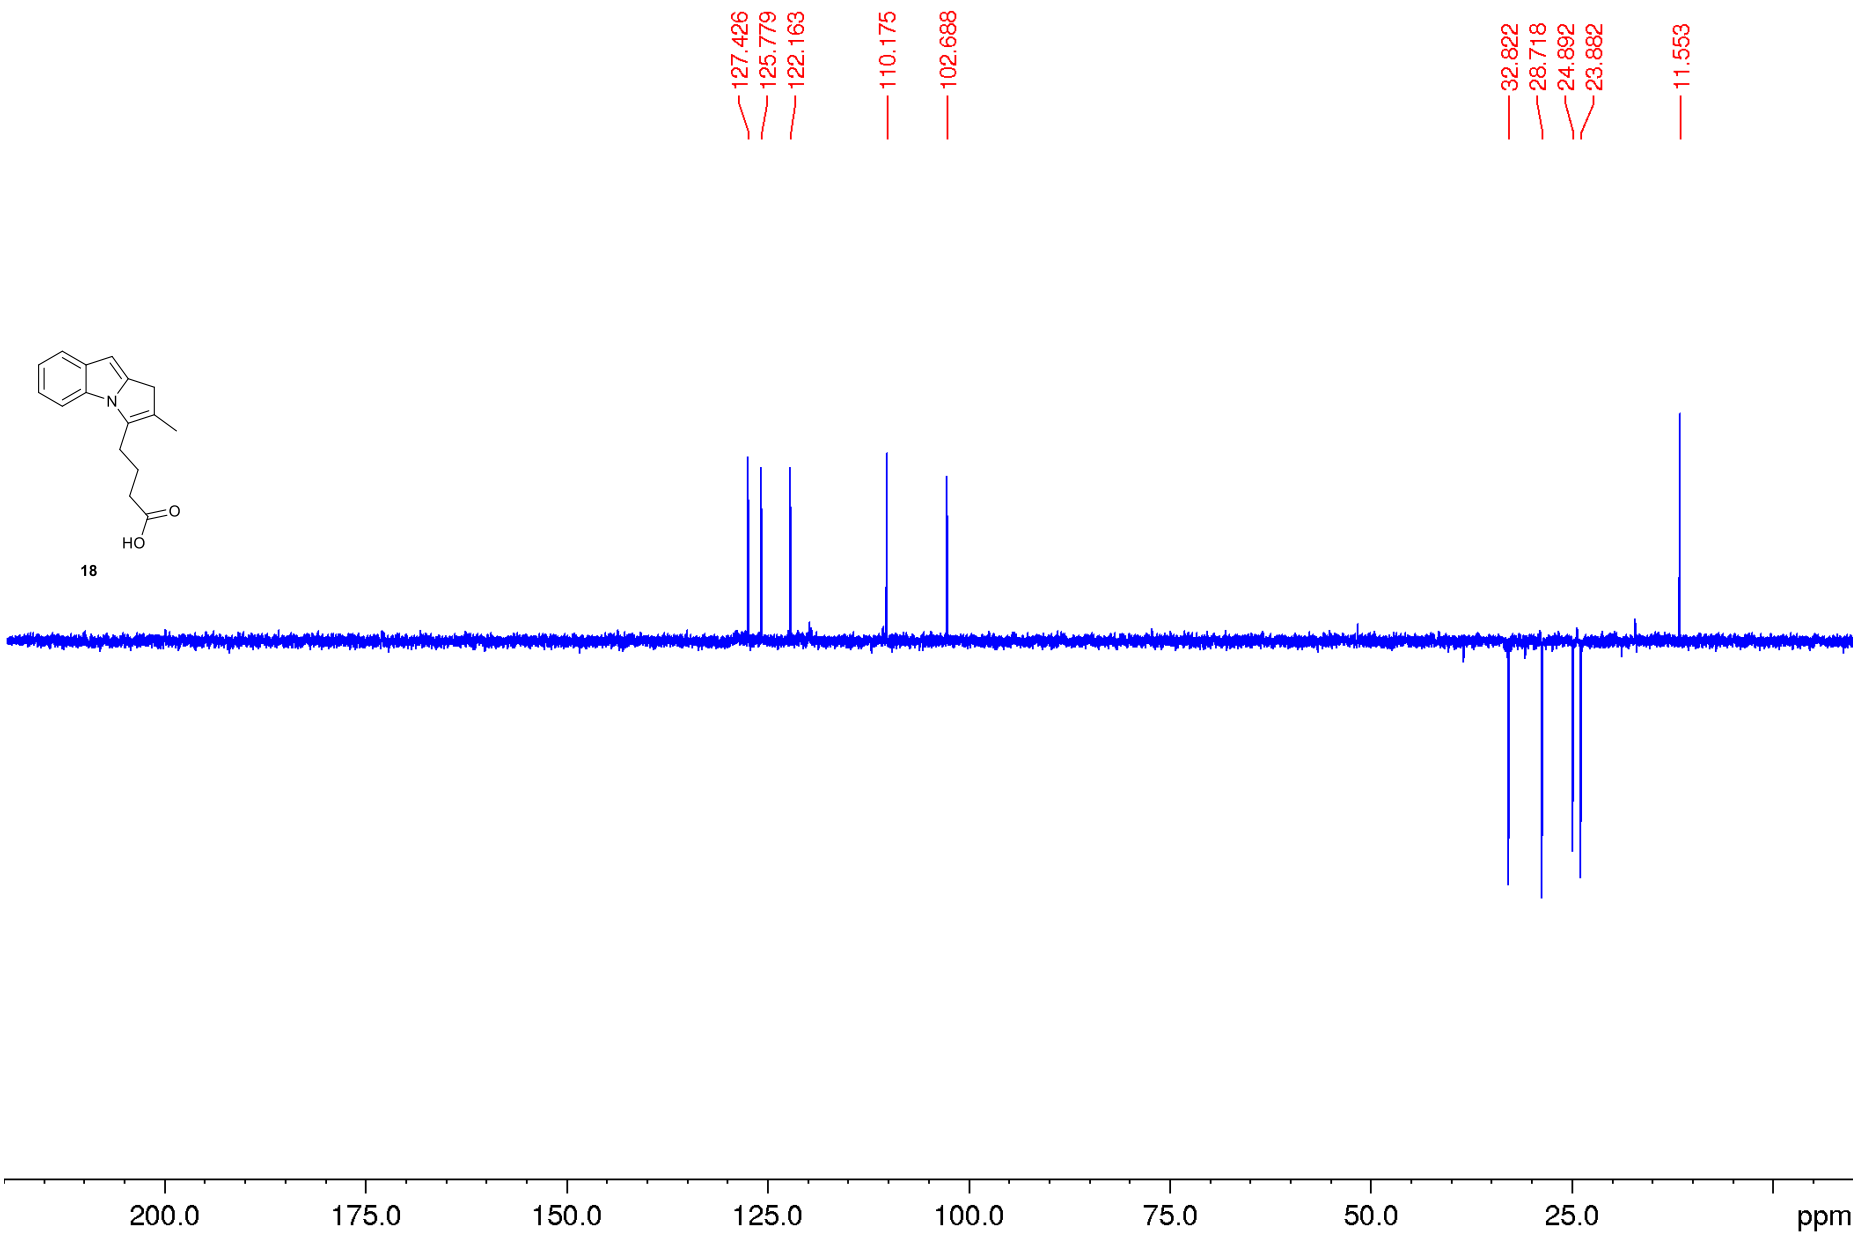

Supplement: s1 [file s1]
